# Supplementary material for: The nuclear matrix protein HNRNPU maintains 3D genome architecture globally in mouse hepatocytes
Source: HighWire-hosted journal article supplement (doi:10.1101/gr.224576.117), 2017-12-22
Supplement: Supplemental_Fig_S1.pdf [file Supplemental_Fig_S1.pdf]

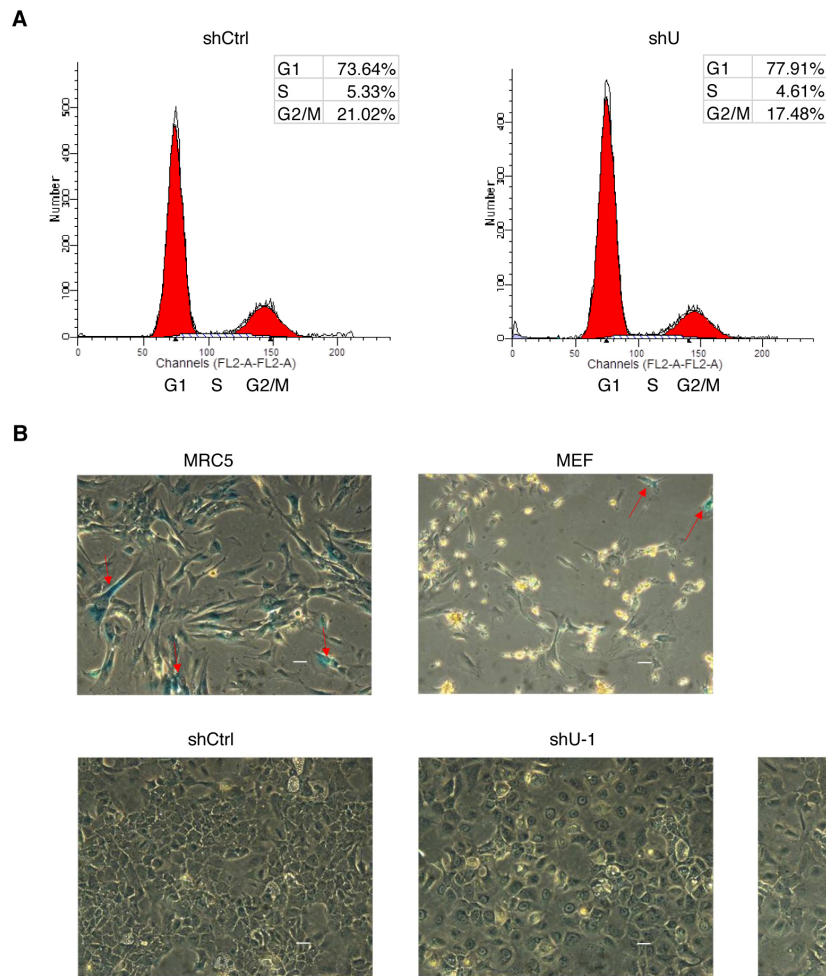

**Supplemental Figure S1. Cell cycle and senescence analysis upon depletion of HNRNPU in AML12 cells.** (A) Cell cycle analysis of shCtrl and shU treated AML12 cells by flow cytometry. (B) Cellular senescence assayed by SA- $\beta$ -gal activity. Late passages of MRC5 and MEF cells were stained as positive controls. The scale bar represents 10  $\mu$ m.
