# Supplementary material for: The nuclear matrix protein HNRNPU maintains 3D genome architecture globally in mouse hepatocytes
Source: HighWire-hosted journal article supplement (doi:10.1101/gr.224576.117), 2017-12-22
Supplement: Supplemental_Fig_S2.pdf [file Supplemental_Fig_S2.pdf]

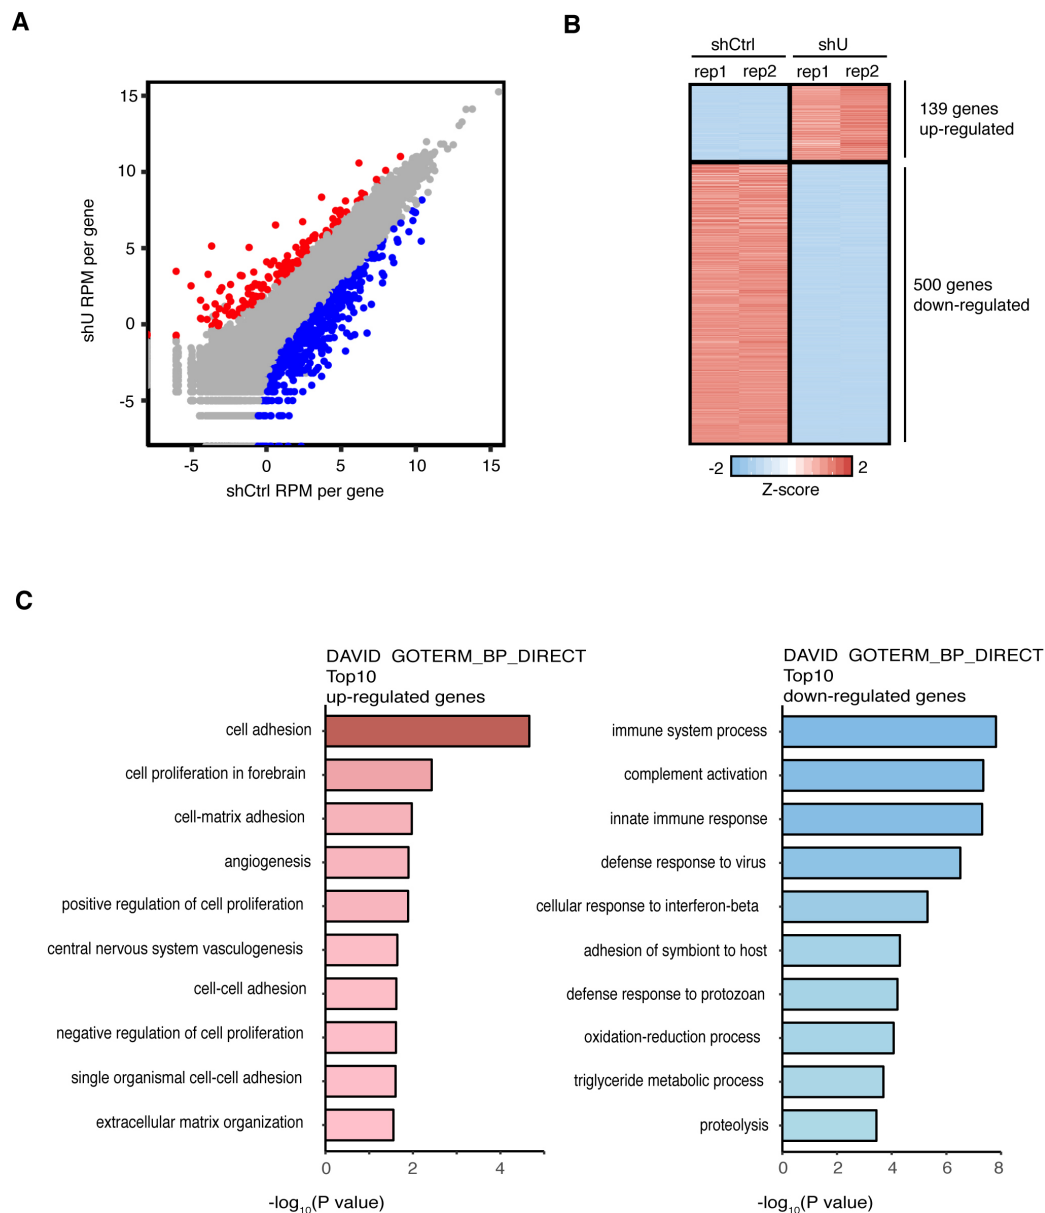

**Supplemental Figure S2. Gene expression changes upon *Hnrnpu* knockdown.** (A) Scatter plot showing gene expressions detected by RNA-seq in shCtrl and shU treated AML12 cells. (B) Heatmap showing differentially expressed genes between the control and knockdown in two biological replicates. Compared with the control, 139 genes were up-regulated and 500 genes were down-regulated significantly. (C) Gene ontology (GO) chart of up-regulated (left) and down-regulated (right) genes. The enriched terms are ranked by  $-\log_{10}(\text{P value})$ .
