# Supplementary material for: The nuclear matrix protein HNRNPU maintains 3D genome architecture globally in mouse hepatocytes
Source: HighWire-hosted journal article supplement (doi:10.1101/gr.224576.117), 2017-12-22
Supplement: Supplemental_Fig_S3.pdf [file Supplemental_Fig_S3.pdf]

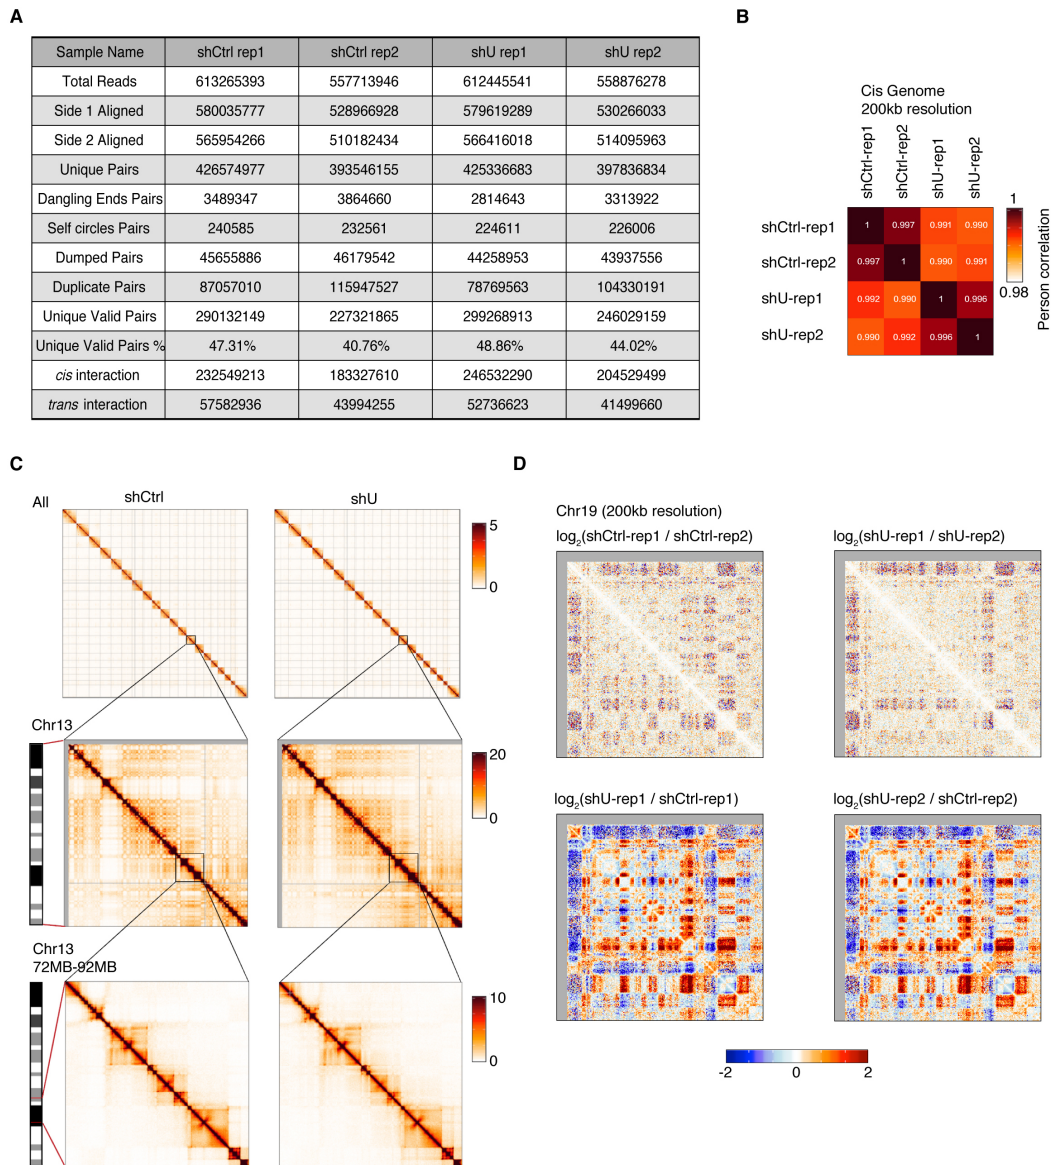

**Supplemental Figure S3. Mapping statistics and the repeatability of Hi-C experiments.** (A) Mapping statistics of Hi-C deep sequencing data of two replicates in the control and *Hnrnp1* knockdown samples. (B) Pearson correlation coefficients from 200 kb binned Hi-C *cis* contact matrices between replicates. (C) Contact matrices in shCtrl (left) and shU (right) treated cells: all chromosomes at 1MB resolution (top); Chr13 at 500 kb resolution (middle); Chr13:72–92 Mb at 40 kb resolution (bottom). (D) Hi-C contact matrices and their changes with *Hnrnp1* knockdown are highly consistent between replicates.
