# Supplementary material for: The nuclear matrix protein HNRNPU maintains 3D genome architecture globally in mouse hepatocytes
Source: HighWire-hosted journal article supplement (doi:10.1101/gr.224576.117), 2017-12-22
Supplement: Supplemental_Fig_S4.pdf [file Supplemental_Fig_S4.pdf]

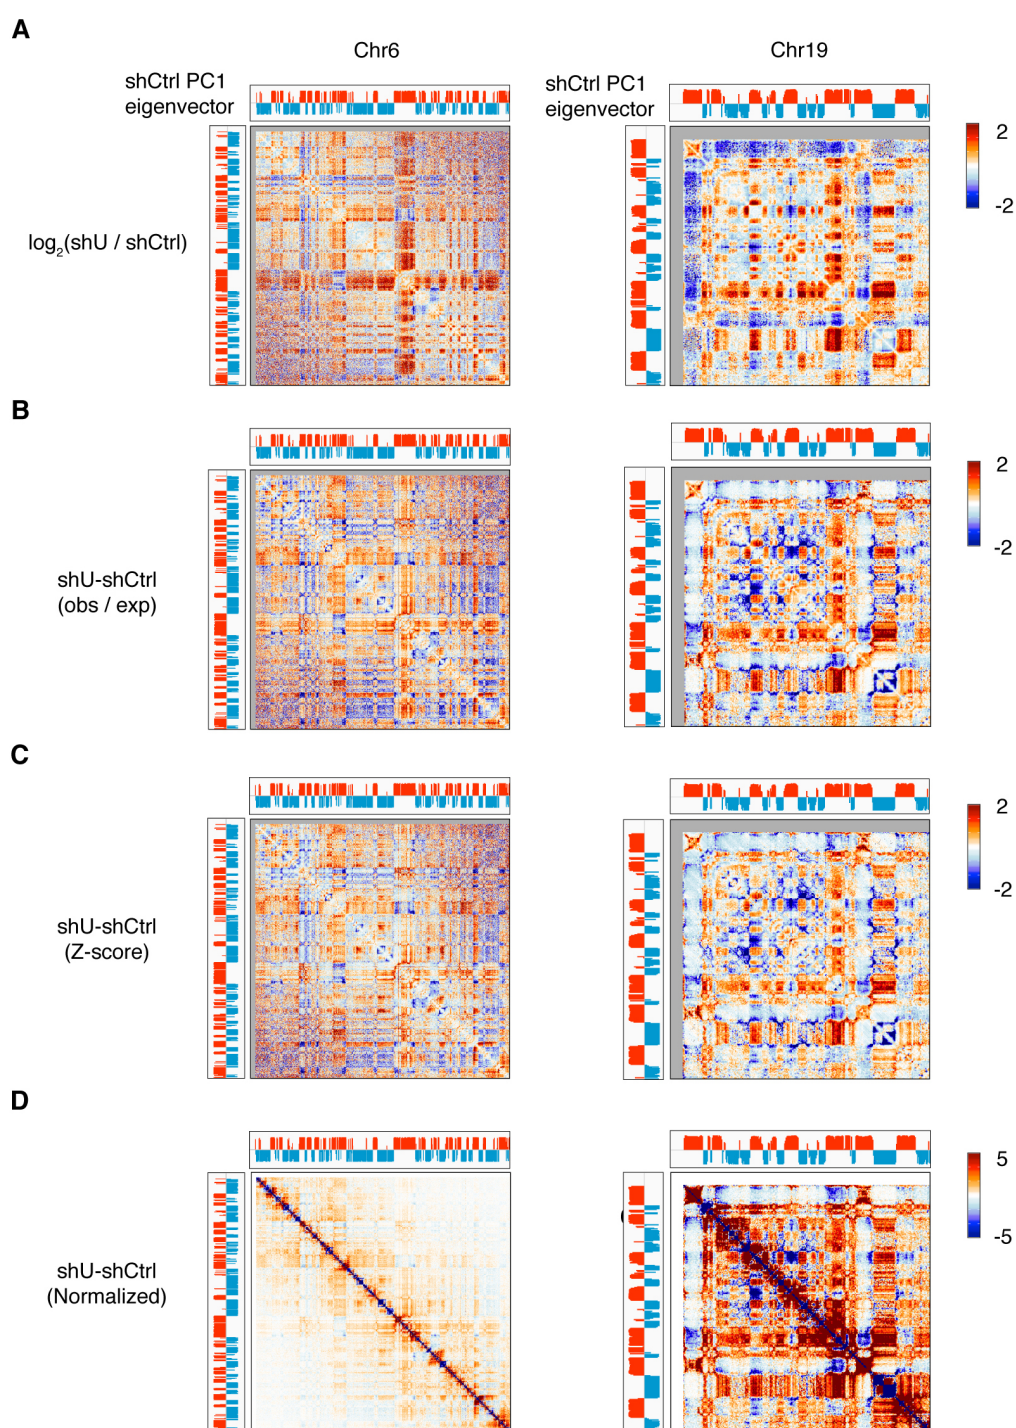

**Supplemental Figure S4. Comparison of statistical methods detecting contact matrix differences.** (A)  $\log_2$  ratio of normalized interaction (shU/shCtrl). (B) Observed interactions/expected interactions. (C) Delta normalized interaction (shU-shCtrl). (D) Z-score difference. Results obtained from all these four methods are similar.
