# Supplementary material for: The nuclear matrix protein HNRNPU maintains 3D genome architecture globally in mouse hepatocytes
Source: HighWire-hosted journal article supplement (doi:10.1101/gr.224576.117), 2017-12-22
Supplement: Supplemental_Fig_S5.pdf [file Supplemental_Fig_S5.pdf]

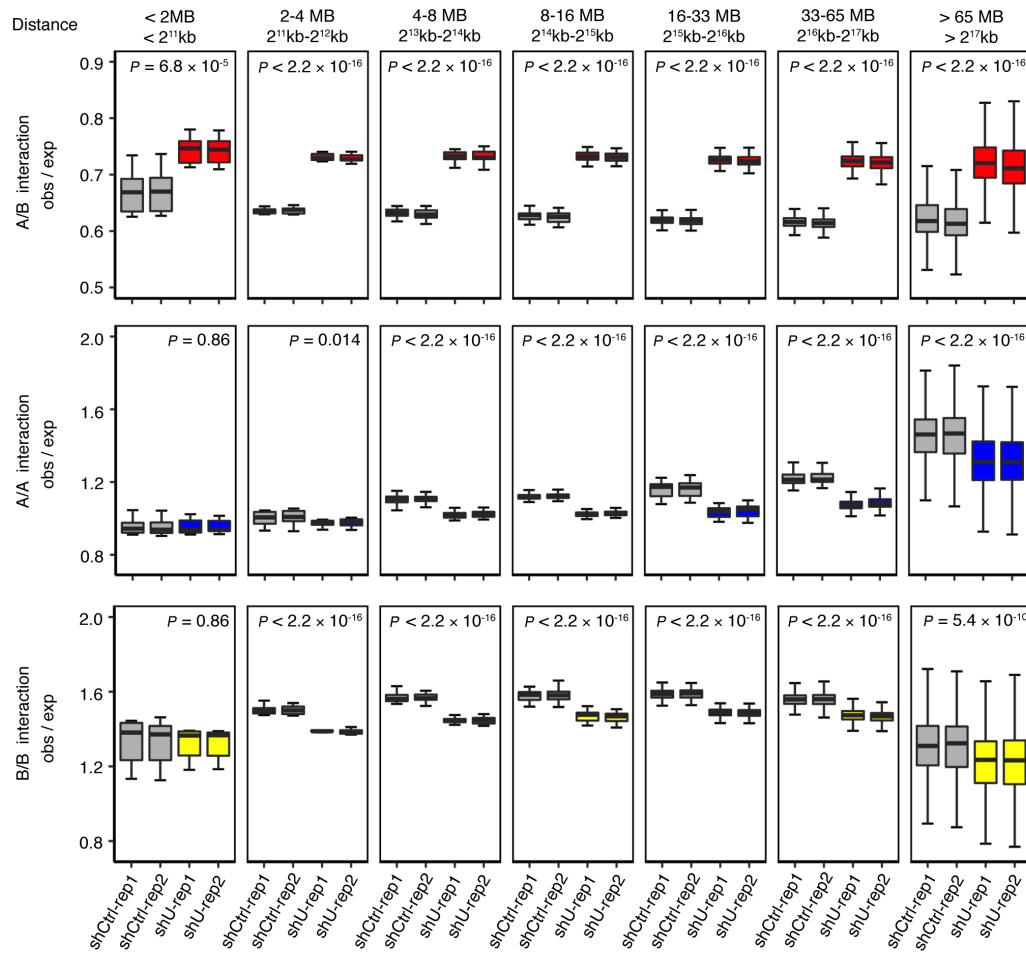

**Supplemental Figure S5. Long-range interactions among compartments in different distance ranges.** Boxplots show interactions of two replicates in control and knockdown. In all distance ranges, interactions between A and B compartments (upper), among A compartments (middle) and among B compartments (lower) were compared. *P* values were obtained by ANOVA.
