# Supplementary material for: The nuclear matrix protein HNRNPU maintains 3D genome architecture globally in mouse hepatocytes
Source: HighWire-hosted journal article supplement (doi:10.1101/gr.224576.117), 2017-12-22
Supplement: Supplemental_Fig_S6.pdf [file Supplemental_Fig_S6.pdf]

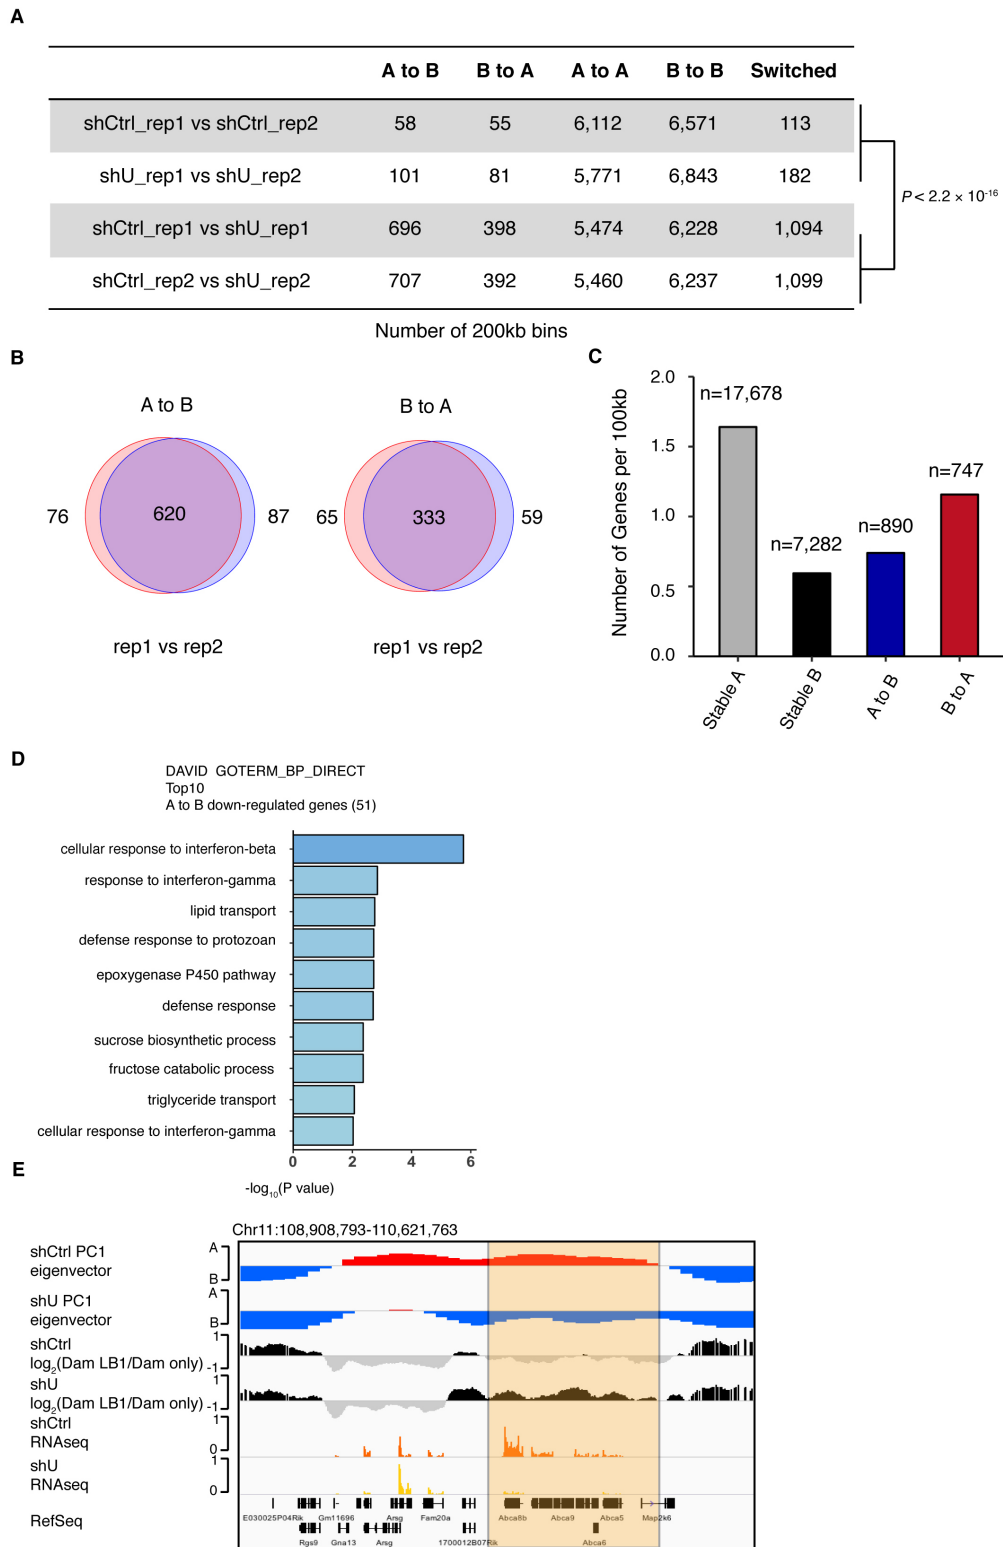

**Supplemental Figure S6. Compartment switching and gene expression changes.** (A) Numbers of switched bins (200 kb) between replicates and conditions. P value was based on generalized linear model with a binomial outcome. (B) Overlaps of switched bins between two replicates. (C) Gene density in unchanged compartment and switched compartments. (D)

GO terms of down-regulated genes paralleled with A-to-B switching. (E) As an example, the *Abca* gene cluster on chromosome 11 (highlighted) displays A-to-B switch and decreases of gene expression.
