# Supplementary material for: The nuclear matrix protein HNRNPU maintains 3D genome architecture globally in mouse hepatocytes
Source: HighWire-hosted journal article supplement (doi:10.1101/gr.224576.117), 2017-12-22
Supplement: Supplemental_Fig_S7.pdf [file Supplemental_Fig_S7.pdf]

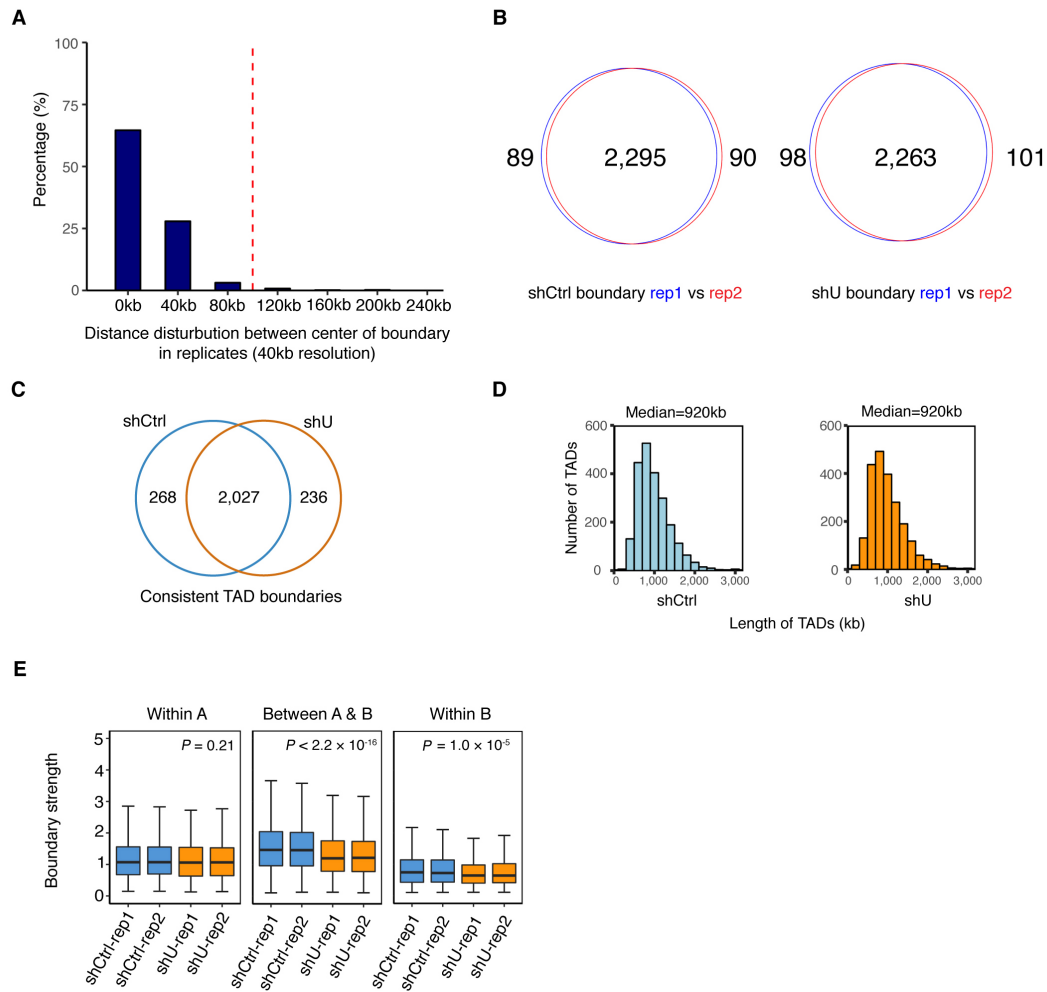

**Supplemental Figure S7. Statistics of TAD boundaries between replicates.** (A) Bar plot shows the distribution of distances among boundaries obtained with biological replicates. Dotted vertical line shows the cutoff to define boundary sharing for replicates. (B) Overlaps of TAD boundaries between replicates in the same condition. (C) The overlap of TAD boundaries between control and knockdown. (D) Distribution of TAD sizes in shCtrl and shU treated AML12 cells. (E) Strengths of TAD boundaries within compartments and between A and B compartments. *P* values were obtained by two-factor ANOVA.
