# Supplementary material for: The nuclear matrix protein HNRNPU maintains 3D genome architecture globally in mouse hepatocytes
Source: HighWire-hosted journal article supplement (doi:10.1101/gr.224576.117), 2017-12-22
Supplement: Supplemental_Fig_S9.pdf [file Supplemental_Fig_S9.pdf]

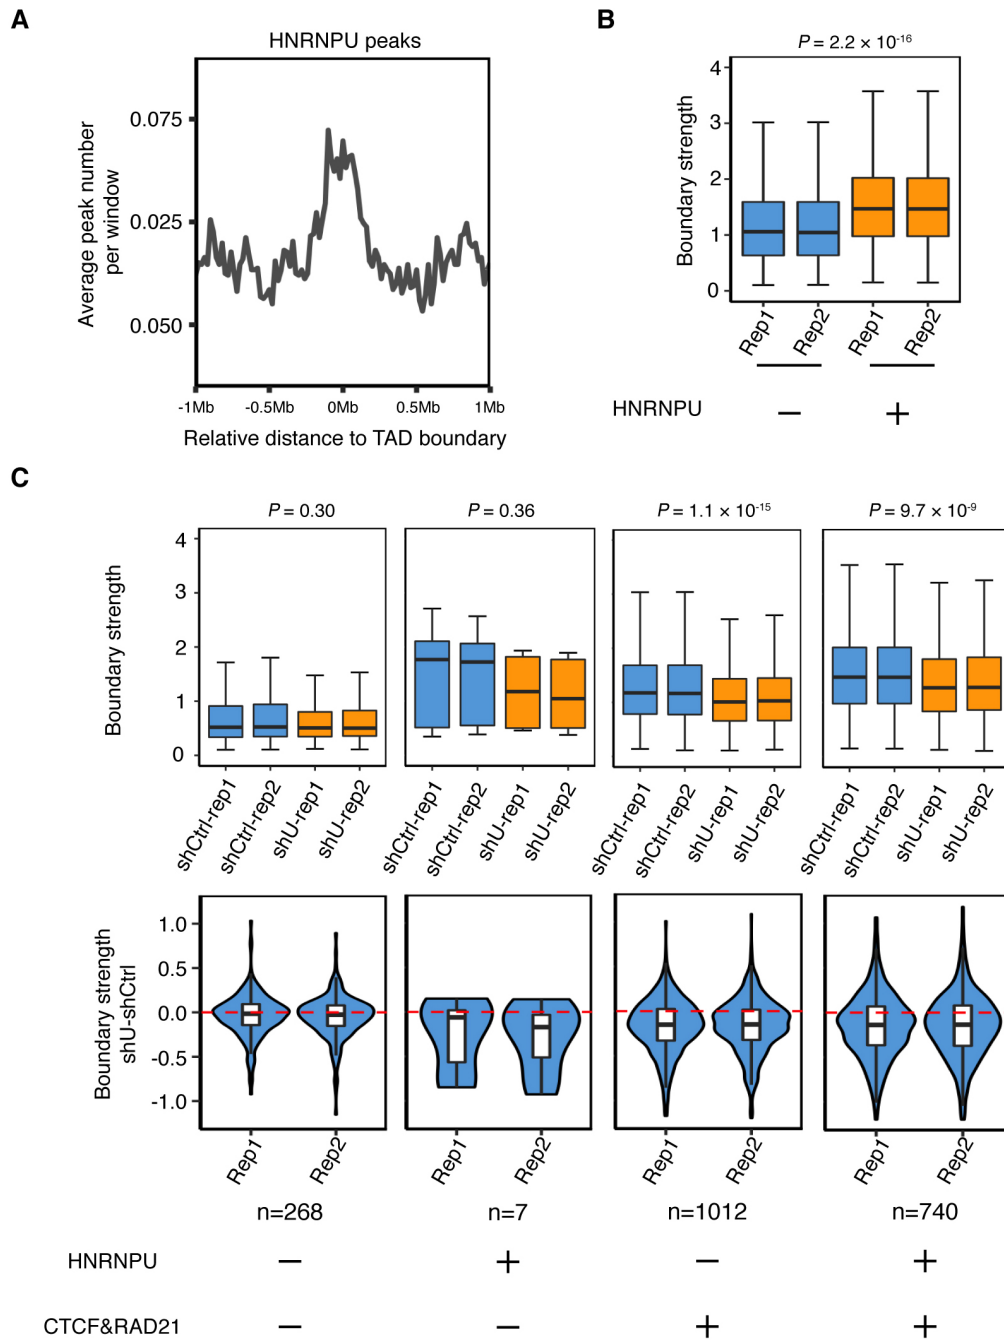

**Supplemental Figure S9. HNRNPU peaks are enriched at TAD boundaries.** (A) Distribution of HNRNPU peaks centered by TAD boundaries. (B) Strengths of boundaries associated or not associated with HNRNPU.  $P$  values were obtained by ANOVA. (C) The boxplots (top) and violin plots (down) show strengths and changes of different group of boundaries according to their association with HNRNPU and /or CTCF&RAD21 peaks.  $P$  values were obtained by ANOVA.
