# Supplementary material for: The nuclear matrix protein HNRNPU maintains 3D genome architecture globally in mouse hepatocytes
Source: HighWire-hosted journal article supplement (doi:10.1101/gr.224576.117), 2017-12-22
Supplement: Supplemental_Fig_S10.pdf [file Supplemental_Fig_S10.pdf]

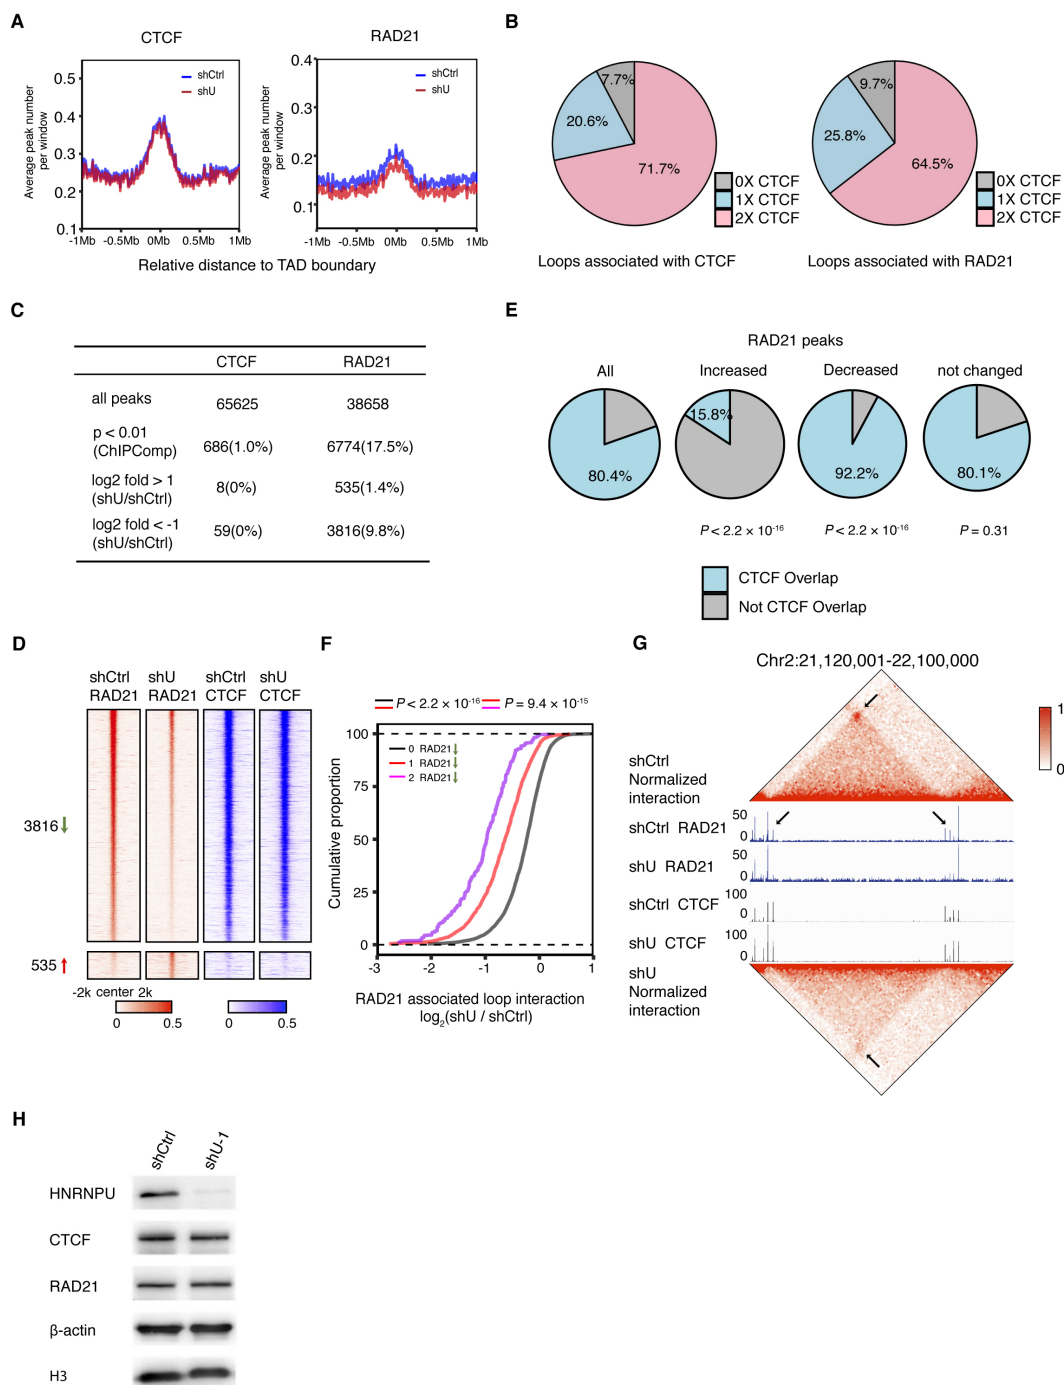

**Supplemental Figure S10. The HNRNPU depletion weakens RAD21 binding.** (A) Distribution of CTCF and RAD21 peaks centered by TAD boundaries. (B) Overlaps of chromatin loops with CTCF or RAD21 binding. 2X: two-side overlap; 1X: one-side overlap; 0X: no overlap. (C) Statistics of differential ChIP-seq peaks of CTCF and RAD21 between the control and *Hnrnpu* knockdown cells. (D) Overlaps of RAD21 peaks with CTCF peaks.  $P$  values were obtained by Chi-square test. (E) Heatmaps showing ChIP-seq signals of RAD21 (red) and CTCF (blue) in differential binding sites of RAD21. (F) Cumulative distribution of interaction differences in RAD21-associated chromatin loops, with or without decreased RAD21 peaks.  $P$  values were obtained by Kolmogorov Smirnov (KS) test. (G) A

representative region showing decreased chromatin loop coincided with reduction of RAD21 binding upon HNRNPU depletion. (H) Western blot analysis with antibodies against specified proteins, Actin and H3 as loading controls.
