# Supplementary material for: The nuclear matrix protein HNRNPU maintains 3D genome architecture globally in mouse hepatocytes
Source: HighWire-hosted journal article supplement (doi:10.1101/gr.224576.117), 2017-12-22
Supplement: Supplemental_Fig_S11.pdf [file Supplemental_Fig_S11.pdf]

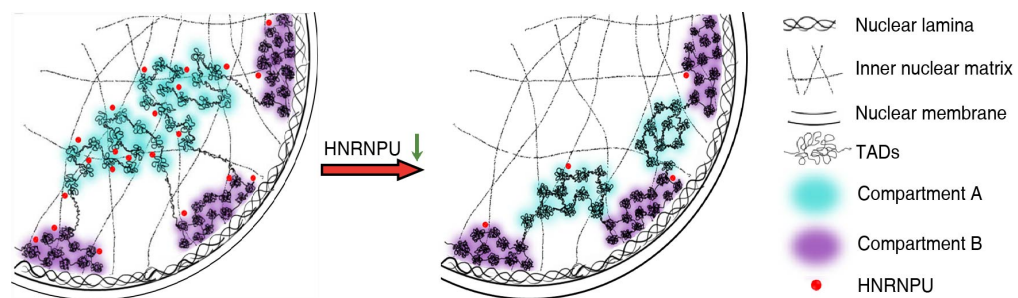

**Supplemental Figure S11.** A hypothetical model for how HNRNPU can maintain 3D genome architectures including compartments and TADs.
