# Supplementary material for: The nuclear matrix protein HNRNPU maintains 3D genome architecture globally in mouse hepatocytes
Source: HighWire-hosted journal article supplement (doi:10.1101/gr.224576.117), 2017-12-22
Supplement: Supplemental_Table_S1.xlsx [file Supplemental_Table_S1.xlsx]

## Sheet: Differential genes
Supplemental Table S1 Differentially expressed genes upon HNRNPU knockdown in AML12 cells.
Gene_ID	Gene_Symbol	baseMean	log2FoldChange	lfcSE	stat	pvalue	padj	shCtrl_rep1_FPKM	shCtrl_rep2_FPKM	shU_rep1_FPKM	shU_rep2_FPKM
ENSMUSG00000000088.6	Cox5a	2595.22	2.09946	0.0925338	22.6886	5.80472e-114	1.04478e-111	46.9632	48.0407	185.048	174.611
ENSMUSG00000000531.4	Grasp	176.684	2.40278	0.242842	9.89444	4.40053e-23	6.04456e-22	0.765126	0.975455	4.48191	4.32813
ENSMUSG00000001946.7	Esam	603.153	2.10991	0.14405	14.647	1.40696e-48	5.48051e-47	2.74928	2.46097	10.2464	9.96325
ENSMUSG00000005397.7	Nid1	5694.51	4.79741	0.109016	44.0067	0	0	2.10291	2.15783	47.9324	59.2885
ENSMUSG00000015090.7	Ptgds	163.859	2.9884	0.263044	11.3608	6.55269e-30	1.28421e-28	0.750879	0.565114	5.33873	5.20804
ENSMUSG00000017491.7	Rarb	197.448	2.13337	0.232396	9.17989	4.31534e-20	5.00918e-19	0.623626	0.788318	3.13795	2.68357
ENSMUSG00000017724.8	Etv4	423.098	3.17329	0.19152	16.569	1.16804e-61	6.80582e-60	1.03131	0.675488	6.94969	7.60862
ENSMUSG00000019194.8	Scn1b	31.8589	2.14669	0.451079	4.75901	1.94541e-06	7.30708e-06	0.13963	0.219823	1.17533	0.98651
ENSMUSG00000019979.6	Apaf1	5592.27	2.18118	0.078601	27.7501	1.73883e-169	6.98163e-167	7.35263	7.61987	29.9561	29.8754
ENSMUSG00000020091.8	Eif4ebp2	248.375	2.00525	0.26092	7.68532	1.52621e-14	1.22145e-13	1.57256	1.90072	4.52718	8.83309
ENSMUSG00000020423.6	Btg2	7655.53	2.1543	0.083576	25.7765	1.62663e-146	4.63116e-144	33.6681	34.7736	141.091	127.55
ENSMUSG00000020542.11	Myocd	79.2067	4.33265	0.417235	10.3842	2.92681e-25	4.53771e-24	0.00454956	0.0300824	0.60198	0.773451
ENSMUSG00000020690.6	Efcab3	50.9659	3.25341	0.422685	7.69702	1.39275e-14	1.11727e-13	0.0626989	0.0690959	0.853372	1.10898
ENSMUSG00000020911.8	Krt19	22385.3	2.30942	0.06918	33.3828	2.43626e-244	2.11941e-241	134.785	136.534	594.814	588.573
ENSMUSG00000020986.7	Sec23a	3172.95	2.66124	0.0886604	30.0162	6.03975e-198	3.26126e-195	5.9464	5.97549	33.8564	32.8905
ENSMUSG00000021061.8	Spnb1	46.7333	2.34623	0.408945	5.73727	9.62141e-09	4.7023e-08	0.0223759	0.041098	0.179903	0.217739
ENSMUSG00000021306.9	Gpr137b	3365.03	3.00853	0.0954431	31.5217	4.38127e-218	2.98288e-215	7.67415	7.64135	51.3073	58.2547
ENSMUSG00000021678.8	F2rl1	258.644	2.7179	0.21433	12.6809	7.54408e-37	1.96234e-35	0.712781	0.845927	4.4889	5.20862
ENSMUSG00000022044.8	Stmn4	189.486	6.2541	0.425307	14.7049	5.99524e-49	2.37069e-47	0.015762	0	6.7455	4.87205
ENSMUSG00000022382.7	Wnt7b	1358.01	2.04541	0.113354	18.0444	8.73687e-73	6.87491e-71	3.80494	4.17806	13.7946	15.4629
ENSMUSG00000023034.6	Nr4a1	61.2394	2.15016	0.361018	5.95582	2.58777e-09	1.34446e-08	0.28076	0.22869	1.19876	1.2703
ENSMUSG00000023484.7	Prph	106.501	4.37866	0.374501	11.692	1.40082e-31	2.92862e-30	0.113351	0.0892257	2.91259	3.63717
ENSMUSG00000024558.5	Mapk4	334.559	2.37762	0.200517	11.8575	1.96869e-32	4.28757e-31	0.618487	0.657027	2.60344	3.55367
ENSMUSG00000024912.5	Fosl1	208.783	2.00884	0.258342	7.7759	7.49133e-15	6.15783e-14	1.66303	1.38428	4.29777	7.45548
ENSMUSG00000025329.3	Padi1	91.5963	4.49592	0.399115	11.2647	1.96006e-29	3.72935e-28	0.0402237	0.0265966	1.37214	1.44225
ENSMUSG00000025473.10	Adam8	1885.27	4.45059	0.123057	36.167	2.00782e-286	2.24575e-283	1.11996	1.184	21.667	24.1858
ENSMUSG00000025921.7	Rdh10	27168.8	4.57095	0.0718902	63.5823	0	0	17.4594	17.5766	373.179	364.987
ENSMUSG00000026249.4	Serpine2	3513.54	2.72999	0.0872572	31.2867	7.08463e-215	4.26686e-212	7.87723	8.13347	47.5692	46.4224
ENSMUSG00000026399.6	Cd55	154.559	2.83224	0.280403	10.1006	5.49081e-24	7.96117e-23	0.161797	0.301746	1.53743	1.80811
ENSMUSG00000026413.6	Pkp1	44.2942	3.58237	0.457925	7.82304	5.15624e-15	4.2743e-14	0.0300557	0.00662444	0.559245	0.445932
ENSMUSG00000026611.9	Spata17	47.6381	2.20512	0.397036	5.55395	2.79287e-08	1.29313e-07	0.136747	0.173883	0.782904	0.899561
ENSMUSG00000026628.8	Atf3	1046.83	2.79238	0.122879	22.7247	2.55305e-114	4.64864e-112	4.58175	4.17692	26.8125	27.6501
ENSMUSG00000026639.11	Lamb3	5217.78	2.98156	0.0807981	36.9014	4.39547e-298	5.73572e-295	8.93892	8.96648	62.5296	62.5388
ENSMUSG00000026679.3	Enkur	35.3571	2.18831	0.444863	4.91907	8.69567e-07	3.40669e-06	0.270852	0.106602	1.19993	1.13621
ENSMUSG00000026712.2	Mrc1	22.927	2.98734	0.50947	5.86363	4.52862e-09	2.29197e-08	0.0101564	0.0055963	0.209977	0.230219
ENSMUSG00000026961.6	Lrrc26	51.5084	4.19747	0.462265	9.08022	1.08352e-19	1.23009e-18	0.0507563	0.0279674	2.38728	2.64095
ENSMUSG00000026976.8	Pax8	324.502	3.71328	0.215542	17.2277	1.6461e-66	1.08761e-64	0.223667	0.235532	2.74881	3.13927
ENSMUSG00000027612.7	Mmp24	319.815	2.49066	0.191461	13.0087	1.09171e-38	3.03105e-37	0.593295	0.732001	3.39315	3.48836
ENSMUSG00000028148.5	Them5	22.4046	2.93271	0.511677	5.73157	9.95064e-09	4.84657e-08	0.0196104	0.0432223	0.709507	0.949649
ENSMUSG00000028262.8	Clca2	273.515	3.64778	0.23052	15.8242	2.12022e-56	1.07794e-54	0.257652	0.369982	3.89018	3.8855
ENSMUSG00000028381.8	Ugcg	1447.7	2.32688	0.111167	20.9314	2.77098e-97	3.3899e-95	3.2622	2.8607	13.2971	14.0536
ENSMUSG00000029093.8	Sorcs2	158.739	4.46171	0.32912	13.5565	7.25321e-42	2.22266e-40	0.0240145	0.0491486	0.914952	1.14525
ENSMUSG00000029648.7	Flt1	113.353	3.01212	0.307174	9.80591	1.06183e-22	1.43214e-21	0.0521454	0.0689587	0.487828	0.558764
ENSMUSG00000030041.8	D6Mm5e	36.0117	3.1273	0.470426	6.6478	2.97515e-11	1.80853e-10	0.0434324	0.0638182	0.71835	1.22317
ENSMUSG00000030093.6	Wnt7a	866.002	2.77458	0.134743	20.5917	3.25868e-94	3.77982e-92	2.09458	2.47615	13.6309	14.5183
ENSMUSG00000030134.8	Rasgef1a	281.743	2.28643	0.198611	11.5121	1.14635e-30	2.31025e-29	1.01269	0.827047	4.05651	4.26683
ENSMUSG00000030607.6	Acan	98.0887	5.25644	0.438427	11.9893	4.04136e-33	9.21159e-32	0.0082121	0	0.725809	0.837661
ENSMUSG00000030616.7	Sytl2	97.8302	2.18576	0.317563	6.88291	5.86429e-12	3.8374e-11	0.113712	0.214077	0.729765	0.79084
ENSMUSG00000031297.8	Slc7a3	189.846	2.6509	0.23916	11.0842	1.49706e-28	2.75469e-27	0.470877	0.378195	2.55752	2.60672
ENSMUSG00000031438.5	Rnf128	13885.6	2.08913	0.0754024	27.7064	5.83991e-169	2.28618e-166	50.6791	51.459	197.647	184.882
ENSMUSG00000031962.4	Cdh15	10.3194	2.33495	0.54437	4.28927	1.79263e-05	5.99292e-05	0	0	0.172848	0.200996
ENSMUSG00000032135.8	Mcam	1575.29	5.95137	0.167067	35.6227	6.24231e-278	6.51655e-275	0.450746	0.456995	27.1459	27.4194
ENSMUSG00000032265.8	Fam46a	267.577	2.02025	0.201814	10.0105	1.37116e-23	1.93258e-22	0.556707	0.692472	2.21075	2.44772
ENSMUSG00000032334.8	Loxl1	190.696	4.10445	0.291223	14.0938	4.14508e-45	1.45208e-43	0.171899	0.159526	2.75896	3.68211
ENSMUSG00000032726.6	Bmp8a	49.2394	2.45742	0.402606	6.10378	1.03591e-09	5.56861e-09	0.200915	0.110707	1.03845	1.09974
ENSMUSG00000032776.7	Mctp2	33.3153	2.11075	0.441004	4.78623	1.69944e-06	6.43069e-06	0.0521859	0.0517592	0.280517	0.306484
ENSMUSG00000033327.9	Tnxb	40.4999	3.0409	0.448297	6.78323	1.1752e-11	7.4685e-11	0.00722891	0.0185884	0.161908	0.196136
ENSMUSG00000033368.8	Trim69	17.0634	2.26187	0.52008	4.34908	1.36712e-05	4.63974e-05	0.0319915	0.0528832	0.446448	0.543873
ENSMUSG00000033949.5	Trim36	46.3053	2.36197	0.415933	5.67871	1.35712e-08	6.51278e-08	0.0435966	0.109816	0.508609	0.481277
ENSMUSG00000034127.7	Tspan8	7868.84	2.42093	0.0803321	30.1365	1.61296e-199	9.02049e-197	54.487	54.2077	266.689	246.803
ENSMUSG00000034586.8	C630004H02Rik	1835.12	2.1877	0.106054	20.6282	1.53195e-94	1.7902e-92	4.88326	4.67892	18.0108	20.6606
ENSMUSG00000035095.11	Fam167a	54.9192	2.78235	0.397045	7.00763	2.42385e-12	1.62897e-11	0.0777257	0.0778689	0.584339	0.793557
ENSMUSG00000035208.9	Slfn8	38.1713	2.37455	0.434145	5.46948	4.51368e-08	2.04869e-07	0.0664385	0.073217	0.564692	0.410724
ENSMUSG00000035775.2	Krt20	6035.02	2.09946	0.0819152	25.6296	7.13158e-145	1.86122e-142	39.2898	39.9651	142.434	157.05
ENSMUSG00000036006.12	Fam65b	480.558	2.36676	0.164101	14.4226	3.73252e-47	1.39161e-45	0.700356	0.593701	2.84815	3.23135
ENSMUSG00000036067.6	Slc2a6	61.5062	2.33035	0.365372	6.37803	1.79385e-10	1.02856e-09	0.150483	0.19693	0.991674	0.959358
ENSMUSG00000036745.8	Ttll7	1133.63	2.19835	0.115661	19.0068	1.49717e-80	1.34736e-78	1.6946	1.59489	6.49936	6.94217
ENSMUSG00000037005.9	Xpnpep2	305.619	3.42838	0.427166	8.02587	1.00805e-15	8.78899e-15	0.29098	0.122809	3.4047	3.61044
ENSMUSG00000037031.8	Tspan15	1130.05	2.77626	0.122541	22.6558	1.22429e-113	2.15407e-111	2.51597	2.73582	16.7454	15.4763
ENSMUSG00000037033.8	Clca4	165.605	2.11411	0.540239	3.91328	9.10494e-05	0.000276253	0	0.0396087	2.13633	3.6384
ENSMUSG00000037071.2	Scd1	980.421	2.5948	0.124223	20.8883	6.84135e-97	8.17777e-95	1.89843	1.89942	9.85093	10.7002
ENSMUSG00000037185.7	Krt80	507.134	2.63995	0.170535	15.4804	4.70599e-54	2.23306e-52	1.14746	0.961974	5.4068	6.67293
ENSMUSG00000037649.9	H2-DMa	245.523	2.28351	0.20925	10.9128	1.00075e-27	1.77071e-26	1.71152	1.54136	6.94374	7.83118
ENSMUSG00000037995.8	Igsf9	262.863	2.05587	0.197786	10.3944	2.62907e-25	4.08825e-24	0.497852	0.498312	1.94052	1.86829
ENSMUSG00000038463.8	Olfml2b	93.434	3.33419	0.341296	9.76921	1.52642e-22	2.03944e-21	0.12685	0.150545	1.54326	1.76945
ENSMUSG00000038831.9	Ralgps1	1260.17	2.10433	0.141654	14.8554	6.41534e-50	2.64363e-48	2.03227	2.06567	6.60018	9.21734
ENSMUSG00000039057.8	Myo16	20.4495	2.42363	0.50686	4.78167	1.73849e-06	6.56766e-06	0.0175505	0.00967055	0.158745	0.167267
ENSMUSG00000039131.9	Gipc2	54.8176	2.1828	0.38148	5.72192	1.05324e-08	5.11084e-08	0.176953	0.120719	0.844915	0.694557
ENSMUSG00000039145.9	Camk1d	638.687	2.69999	0.15143	17.83	4.13567e-71	3.14371e-69	0.711592	0.784194	4.07305	4.74682
ENSMUSG00000039196.2	Orm1	577.681	2.27103	0.147553	15.3913	1.87169e-53	8.67124e-52	8.88464	7.9016	36.7369	36.3356
ENSMUSG00000039234.7	Sec24d	784.34	3.06499	0.149202	20.5426	8.97017e-94	1.02528e-91	1.27661	1.54495	9.86906	11.6201
ENSMUSG00000039309.5	Edaradd	19.1202	2.20974	0.508321	4.34713	1.37931e-05	4.67808e-05	0.0502914	0.0415668	0.454888	0.401582
ENSMUSG00000039384.8	Dusp10	2930.42	2.4274	0.0913352	26.5768	1.25956e-155	4.02521e-153	10.0964	10.0325	45.8936	49.9372
ENSMUSG00000039457.3	Ppl	14841.7	2.00199	0.0700235	28.5903	8.86005e-180	4.08058e-177	31.6867	31.6269	110.719	112.29
ENSMUSG00000039742.8	Fam71f1	110.839	3.06567	0.321604	9.53246	1.53601e-21	1.95548e-20	0.538291	0.245467	3.53053	3.80585
ENSMUSG00000039903.9	4931408A02Rik	22.1312	2.79188	0.507494	5.5013	3.76994e-08	1.72764e-07	0.0158697	0.0174888	0.3445	0.310671
ENSMUSG00000040488.9	Ltbp4	211.4	2.50739	0.238581	10.5096	7.80221e-26	1.25179e-24	0.294383	0.314119	1.39596	1.9258
ENSMUSG00000040703.5	Cyp2s1	620.3	3.20269	0.153142	20.9133	4.05532e-97	4.88479e-95	0.80729	0.781818	6.63815	6.76137
ENSMUSG00000040729.6	AK129341	271.99	3.09111	0.212718	14.5315	7.65423e-48	2.92336e-46	0.480285	0.492784	3.852	4.07829
ENSMUSG00000043822.11	Adamtsl5	99.9622	3.22787	0.329124	9.80745	1.04573e-22	1.41165e-21	0.0895383	0.126866	1.11069	1.19272
ENSMUSG00000044337.5	Cxcr7	33.9496	2.84243	0.46638	6.09467	1.09663e-09	5.88491e-09	0.0180406	0.0695843	0.559468	0.557637
ENSMUSG00000044646.8	Zbtb7c	27.595	2.86783	0.487562	5.88197	4.05413e-09	2.06652e-08	0.0191584	0.021113	0.277261	0.375052
ENSMUSG00000046027.10	Stard5	2400.67	2.6601	0.103592	25.6786	2.02537e-145	5.56407e-143	4.28341	3.69452	23.2276	21.6443
ENSMUSG00000046997.5	Spsb4	340.032	2.86827	0.192638	14.8894	3.85978e-50	1.59895e-48	0.55901	0.601199	3.68994	4.22608
ENSMUSG00000047298.3	Kcnv2	28.4067	2.1913	0.464891	4.71357	2.43414e-06	9.03657e-06	0.0472983	0.039093	0.256689	0.322858
ENSMUSG00000048373.7	Fgfbp1	161.717	4.56966	0.326475	13.9969	1.62708e-44	5.52679e-43	0.314038	0.201879	8.25093	7.79252
ENSMUSG00000049422.6	Chchd10	258.539	2.10049	0.206353	10.1791	2.45772e-24	3.63757e-23	3.60213	3.08356	14.2627	12.294
ENSMUSG00000050192.7	Eif5a2	517.628	2.33326	0.153916	15.1593	6.57399e-52	2.85158e-50	1.09499	1.15337	5.25308	4.98656
ENSMUSG00000050359.6	Sprr1a	69.6131	2.25247	0.349774	6.43979	1.19639e-10	6.92325e-10	0.866084	0.829955	3.8147	4.92737
ENSMUSG00000051379.6	Flrt3	2227.41	2.15013	0.094132	22.8416	1.7706e-115	3.26186e-113	5.48752	5.74639	22.1255	21.9508
ENSMUSG00000052135.7	Foxo6	212.037	2.09306	0.245546	8.5241	1.54006e-17	1.50818e-16	1.13178	0.801803	3.19943	4.66445
ENSMUSG00000052180.7	Serpinb6c	10.8529	2.40703	0.544185	4.42319	9.72562e-06	3.35966e-05	0	0	0.441248	0.461794
ENSMUSG00000055360.7	Prl2c5	10.2848	2.15341	0.543939	3.95892	7.52888e-05	0.000231438	0.0256584	0	0.503949	0.5023
ENSMUSG00000056413.9	Adap1	329.384	2.42317	0.192305	12.6007	2.09384e-36	5.375e-35	0.895091	1.16109	5.28176	4.88982
ENSMUSG00000056457.5	Prl2c3	37.9583	3.59159	0.477082	7.52824	5.1428e-14	3.94761e-13	0.142118	0	2.53419	2.59911
ENSMUSG00000056737.8	Capg	337.394	2.13363	0.195993	10.8863	1.33982e-27	2.35468e-26	1.89869	1.28966	6.64114	6.27491
ENSMUSG00000056758.8	Hmga2	3424.78	2.18654	0.111677	19.5792	2.32586e-85	2.33466e-83	5.93118	6.17265	21.3439	27.6471
ENSMUSG00000057092.6	Fxyd3	10.5516	2.18804	0.543705	4.0243	5.71445e-05	0.000178608	0.00633123	0	0.130894	0.123943
ENSMUSG00000058427.6	Cxcl2	56.7664	2.31365	0.378188	6.11772	9.49211e-10	5.11483e-09	0.247541	0.309169	1.39885	1.76835
ENSMUSG00000059974.4	Ntm	190.602	2.58171	0.250372	10.3115	6.25024e-25	9.61419e-24	0.160738	0.255407	1.10901	1.30565
ENSMUSG00000060924.7	Csmd1	232.061	2.51944	0.218522	11.5294	9.37712e-31	1.89711e-29	0.109437	0.118855	0.573836	0.661837
ENSMUSG00000061119.6	Prcp	335.212	2.15415	0.180315	11.9466	6.7626e-33	1.52368e-31	1.2975	1.40736	5.39667	5.58954
ENSMUSG00000061451.7	Tmem151a	1380.18	2.04231	0.111703	18.2833	1.12306e-74	9.11192e-73	3.68155	3.78022	12.7873	14.4997
ENSMUSG00000062591.5	Tubb4	139.434	2.0755	0.266435	7.78988	6.70702e-15	5.52765e-14	0.772621	0.717009	2.63422	3.43563
ENSMUSG00000063011.6	Msln	42472.3	2.22946	0.0691794	32.2272	7.34651e-228	5.75195e-225	233.871	239.171	991.661	959.758
ENSMUSG00000063415.5	Cyp26b1	71.3648	2.68686	0.356773	7.53101	5.03476e-14	3.86657e-13	0.091873	0.130174	0.766551	0.865464
ENSMUSG00000067219.5	Nipal1	115.975	2.75082	0.304648	9.02948	1.72485e-19	1.93616e-18	0.165184	0.245355	1.26209	1.62796
ENSMUSG00000068699.5	Flnc	14766.3	2.32903	0.0744	31.3042	4.09582e-215	2.56546e-212	17.1586	17.2073	72.9081	79.243
ENSMUSG00000070695.3	Cntnap5a	366.227	2.24534	0.180826	12.4171	2.10961e-35	5.22695e-34	0.716121	0.747958	2.88925	3.46347
ENSMUSG00000071478.4	Hist1h2ad	40.856	2.31538	0.42424	5.45772	4.823e-08	2.18086e-07	0.73916	0.407287	3.43838	3.97112
ENSMUSG00000071537.3	Klrg2	287.83	2.33009	0.201816	11.5456	7.76689e-31	1.5795e-29	1.53514	1.13757	6.34763	6.16324
ENSMUSG00000073738.2	Gm10567	48.9448	2.05031	0.396274	5.17396	2.29181e-07	9.54708e-07	0.137325	0.252226	0.946367	0.896107
ENSMUSG00000074259.4	Gramd2	28.5765	2.39295	0.475498	5.0325	4.84113e-07	1.94877e-06	0.0147605	0.0433772	0.223787	0.273749
ENSMUSG00000074973.3	Gm11382	32.4075	2.47947	0.455173	5.44731	5.11361e-08	2.30561e-07	1.43809	0.990511	9.84863	10.7425
ENSMUSG00000075118.3	Gpr137b-ps	677.25	2.62055	0.149582	17.5192	1.02199e-68	7.18441e-67	1.81381	2.32091	11.1248	11.8671
ENSMUSG00000075602.4	Ly6a	567.289	5.96262	0.264597	22.5347	1.89581e-112	3.26225e-110	0.479365	0.609545	44.5976	35.9412
ENSMUSG00000076867.1	Trdv4	336.908	2.04274	0.179918	11.3537	7.10641e-30	1.38752e-28	12.8678	11.9619	48.23	45.0057
ENSMUSG00000079018.3	Ly6c1	597.947	7.38197	0.354486	20.8244	2.59975e-96	3.06086e-94	0.107857	0.0792409	44.5604	39.0434
ENSMUSG00000079049.2	Serpinb1c	69.2933	2.3426	0.350546	6.68271	2.34565e-11	1.44381e-10	0.401774	0.541157	2.515	2.69075
ENSMUSG00000082307.1	Gm13418	61.4028	3.62149	0.411275	8.80552	1.30243e-18	1.38457e-17	0.127966	0.246788	3.6708	3.65878
ENSMUSG00000085091.1	E230015J15Rik	74.4068	2.96983	0.359479	8.26148	1.43877e-16	1.31599e-15	0.0891951	0.122869	0.922027	1.0492
ENSMUSG00000085747.1	Gm11194	116.753	3.29535	0.309802	10.637	2.00584e-26	3.30974e-25	0.149876	0.174343	1.75587	1.75012
ENSMUSG00000085830.1	E130003G02Rik	10.5822	2.36809	0.544313	4.3506	1.35768e-05	4.60968e-05	0	0	0.194372	0.236788
ENSMUSG00000085976.1	Gm13816	54.2043	2.16039	0.384344	5.62096	1.89894e-08	8.95649e-08	0.886993	0.605113	3.27465	4.35191
ENSMUSG00000087088.1	Gm16638	317.419	2.90024	0.195346	14.8467	7.30454e-50	3.00215e-48	1.31164	1.23131	8.80473	9.0095
ENSMUSG00000087113.1	Gm11714	69.9033	2.3699	0.371578	6.37793	1.79495e-10	1.02881e-09	0.999771	0.379922	4.41903	3.7652
ENSMUSG00000087265.1	Gm12349	17.4736	2.04007	0.519264	3.92877	8.53815e-05	0.000260114	0.275799	0.0506563	1.37798	1.46819
ENSMUSG00000090982.1	9430076C15Rik	73.5798	2.11518	0.341298	6.19746	5.73824e-10	3.15613e-09	1.02954	1.56681	6.08148	5.708
ENSMUSG00000091712.1	Sec14l5	98.8281	2.61849	0.312627	8.37574	5.48778e-17	5.16425e-16	0.323064	0.356025	1.99038	2.39662
ENSMUSG00000000049.5	Apoh	75.4149	-3.11583	0.375631	-8.29491	1.08665e-16	1.00093e-15	3.3345	2.56812	0.137094	0.273291
ENSMUSG00000000142.9	Axin2	81.5888	-2.37588	0.33502	-7.09176	1.32414e-12	9.10214e-12	0.877588	0.846234	0.0963877	0.141283
ENSMUSG00000000202.3	Btbd17	16.8637	-2.28176	0.522818	-4.36435	1.275e-05	4.34217e-05	0.312708	0.355055	0.019591	0.0195269
ENSMUSG00000000416.9	Cttnbp2	1151.81	-2.65875	0.141285	-18.8184	5.336e-79	4.66795e-77	7.40156	7.62136	0.819515	1.19571
ENSMUSG00000000753.8	Serpinf1	141.247	-2.32362	0.26448	-8.78563	1.55485e-18	1.64176e-17	3.35413	3.48472	0.516114	0.553997
ENSMUSG00000000958.4	Slc7a7	564.699	-2.54786	0.152254	-16.7343	7.37529e-63	4.49376e-61	14.6211	14.1335	2.11789	2.02872
ENSMUSG00000001155.7	Ftcd	21.2506	-2.36227	0.504191	-4.68528	2.79577e-06	1.03009e-05	0.454135	0.375352	0.0293405	0.0292445
ENSMUSG00000001168.9	Oas1h	10.9087	-2.14857	0.543464	-3.95347	7.70263e-05	0.000236547	0.361573	0.455387	0.0177983	0
ENSMUSG00000001228.8	Uhrf1	863.419	-2.63059	0.134952	-19.4928	1.26477e-84	1.25349e-82	11.5156	12.0809	1.74453	1.49042
ENSMUSG00000001270.8	Ckb	14.7235	-2.75586	0.539934	-5.10407	3.32428e-07	1.36127e-06	0.756021	0.585461	0	0
ENSMUSG00000001520.6	Nrip2	520.143	-2.18517	0.155675	-14.0367	9.29324e-45	3.19831e-43	8.31715	7.7151	1.39538	1.5895
ENSMUSG00000001663.4	Gstt1	1383.33	-5.12648	0.154863	-33.1033	2.66195e-240	2.19387e-237	58.6014	60.1588	1.20542	1.54766
ENSMUSG00000001665.4	Gstt3	216.963	-2.04419	0.220066	-9.28897	1.55782e-20	1.87501e-19	4.82832	4.23141	0.843738	0.959425
ENSMUSG00000001802.9	Lrp3	42.721	-2.13442	0.446565	-4.77964	1.7561e-06	6.62779e-06	0.583085	0.467962	0.0196547	0.117543
ENSMUSG00000002104.5	Rapsn	33.8571	-2.16886	0.448239	-4.83863	1.3074e-06	5.00553e-06	1.29045	0.923451	0.12127	0.155408
ENSMUSG00000002847.6	Pla1a	1955.84	-2.20792	0.0976961	-22.5998	4.3487e-113	7.56626e-111	54.2895	55.7443	10.2109	10.351
ENSMUSG00000002944.8	Cd36	261.003	-5.68302	0.344778	-16.4831	4.85205e-61	2.78309e-59	4.21431	4.64428	0.0556476	0.0237709
ENSMUSG00000002985.9	Apoe	7309.74	-3.18938	0.0876767	-36.3766	9.97104e-290	1.20105e-286	225.63	223.018	22.6411	19.7226
ENSMUSG00000002992.10	Apoc2	431.71	-4.07974	0.204464	-19.9533	1.40232e-88	1.48372e-86	29.0983	30.1388	1.37334	1.36884
ENSMUSG00000003273.7	Car11	22.403	-2.09857	0.495847	-4.23228	2.31329e-05	7.62607e-05	0.846729	0.552958	0.0810444	0.0646234
ENSMUSG00000003420.7	Fcgrt	519.186	-3.02056	0.16918	-17.8541	2.68521e-71	2.06116e-69	16.9071	19.1108	1.93992	1.73663
ENSMUSG00000003555.7	Cyp17a1	32.4984	-2.41509	0.457455	-5.27941	1.29599e-07	5.55693e-07	0.808679	1.01411	0.0864773	0.0861943
ENSMUSG00000003617.10	Cp	24964	-2.04531	0.0702683	-29.1072	2.91435e-186	1.47212e-183	138.732	144.47	30.0402	29.5841
ENSMUSG00000003824.6	Syce2	92.9358	-2.14611	0.315476	-6.80277	1.02625e-11	6.56191e-11	2.80823	2.51976	0.364848	0.537576
ENSMUSG00000004035.6	Gstm7	337.189	-2.41816	0.186664	-12.9546	2.21173e-38	6.0654e-37	11.6763	12.4103	1.75493	1.98242
ENSMUSG00000004110.7	Cacna1e	77.7835	-2.60844	0.35439	-7.36036	1.83411e-13	1.3427e-12	0.378213	0.353888	0.054096	0.0269595
ENSMUSG00000005220.2	Corin	880.905	-4.74348	0.17149	-27.6604	2.09153e-168	7.9881e-166	11.7068	11.0827	0.34115	0.340033
ENSMUSG00000005373.6	Mlxipl	139.818	-2.44061	0.272241	-8.9649	3.1057e-19	3.41998e-18	1.54684	1.46911	0.180251	0.249207
ENSMUSG00000005628.6	Tmod4	106.804	-2.26006	0.296297	-7.62768	2.39021e-14	1.87987e-13	3.465	3.62468	0.509093	0.616161
ENSMUSG00000006494.5	Pdk1	558.803	-2.28802	0.154491	-14.8101	1.26093e-49	5.10204e-48	4.31317	3.76066	0.698288	0.700003
ENSMUSG00000006529.8	Itih1	18.0236	-3.04629	0.534119	-5.70339	1.17448e-08	5.6728e-08	0.403522	0.333519	0	0
ENSMUSG00000006611.8	Hfe	181.013	-2.08782	0.239976	-8.70012	3.31541e-18	3.3932e-17	2.68858	2.9163	0.603041	0.46169
ENSMUSG00000007646.7	Rad51c	95.8815	-2.51366	0.317456	-7.91812	2.41126e-15	2.04097e-14	1.21241	1.35888	0.142419	0.184539
ENSMUSG00000010651.4	Acaa1b	527.391	-2.06846	0.156084	-13.2522	4.38097e-40	1.26805e-38	15.454	13.9435	3.16638	2.7754
ENSMUSG00000012350.8	Ehf	361.055	-2.44979	0.191964	-12.7617	2.68143e-37	7.04505e-36	3.95914	3.47375	0.643849	0.479912
ENSMUSG00000015083.5	C8g	92.1952	-2.97922	0.337239	-8.83413	1.00877e-18	1.07972e-17	3.74213	3.83414	0.250917	0.395986
ENSMUSG00000015224.9	Cyp2j9	15.4144	-2.45886	0.532415	-4.61831	3.86874e-06	1.40009e-05	0.271501	0.329122	0.0093552	0.00932459
ENSMUSG00000015243.4	Abca1	1223.47	-3.58155	0.126909	-28.2215	3.18784e-175	1.38662e-172	7.24765	7.46362	0.497059	0.540472
ENSMUSG00000015340.4	Cybb	586.216	-6.27209	0.283274	-22.1414	1.2621e-108	2.05867e-106	6.82204	6.6528	0.0430004	0.0589321
ENSMUSG00000015354.8	Pcolce2	224.503	-2.3485	0.219051	-10.7213	8.08814e-27	1.37367e-25	2.81431	2.71287	0.411744	0.470947
ENSMUSG00000015568.8	Lpl	251.848	-2.05822	0.206655	-9.95968	2.28789e-23	3.1902e-22	1.8936	2.16499	0.39424	0.411227
ENSMUSG00000015890.2	Amdhd1	14.7355	-2.38233	0.534712	-4.45534	8.37586e-06	2.91721e-05	0.474019	0.316178	0.0128948	0.0128526
ENSMUSG00000016179.5	Camk1g	76.3584	-2.5552	0.349065	-7.32013	2.47728e-13	1.79841e-12	1.60925	1.28495	0.16934	0.168786
ENSMUSG00000016262.7	Sertad4	129.434	-2.62772	0.281983	-9.31872	1.17755e-20	1.43162e-19	1.9731	1.94417	0.255953	0.223226
ENSMUSG00000016942.4	Tmprss6	33.3173	-2.40876	0.465003	-5.18009	2.21784e-07	9.25862e-07	0.823378	0.448477	0.0684826	0.0487561
ENSMUSG00000017316.6	Ppy	9.9658	-2.02754	0.544226	-3.72555	0.000194887	0.000563362	1.1476	1.46437	0.0624366	0
ENSMUSG00000017344.4	Vtn	507.101	-4.84643	0.223493	-21.6849	2.85061e-104	4.05797e-102	17.1976	15.4766	0.322948	0.521157
ENSMUSG00000017453.4	Pipox	222.949	-4.26488	0.280016	-15.2308	2.2076e-52	9.73767e-51	5.8566	5.82084	0.25278	0.163769
ENSMUSG00000017639.6	Rab11fip4	26.5548	-3.2262	0.508342	-6.34651	2.20256e-10	1.25509e-09	0.20671	0.263534	0.00837962	0
ENSMUSG00000017652.8	Cd40	288.219	-2.70562	0.203211	-13.3143	1.91131e-40	5.61524e-39	5.03629	4.93453	0.650763	0.59382
ENSMUSG00000017718.8	Afmid	689.654	-2.34018	0.138468	-16.9005	4.4636e-64	2.76267e-62	10.3805	10.3754	1.6886	1.79915
ENSMUSG00000017740.9	Slc12a5	34.2535	-2.12308	0.443373	-4.78847	1.68055e-06	6.36261e-06	0.256645	0.301376	0.0434916	0.0303445
ENSMUSG00000017830.8	Dhx58	69.2051	-2.17246	0.350079	-6.20562	5.44805e-10	3.00708e-09	1.21605	1.07017	0.198958	0.162251
ENSMUSG00000018983.8	E2f2	16.1796	-2.06102	0.524823	-3.92708	8.5985e-05	0.00026175	0.191766	0.218148	0.00639457	0.0254946
ENSMUSG00000019122.7	Ccl9	132.123	-4.97693	0.387918	-12.8298	1.11584e-37	2.99194e-36	2.77701	2.98383	0.0307569	0.0408751
ENSMUSG00000019301.5	Hsd17b1	42.5052	-2.8329	0.436203	-6.49446	8.33335e-11	4.87456e-10	2.1652	1.78958	0.163202	0.116192
ENSMUSG00000019564.6	Arid3a	336.354	-2.71515	0.192062	-14.1368	2.25198e-45	7.9602e-44	3.65419	3.47053	0.409733	0.48112
ENSMUSG00000019769.9	Syne1	16913.1	-2.31329	0.0738127	-31.34	1.33163e-215	8.68834e-213	29.4341	31.5035	5.33032	5.30888
ENSMUSG00000019838.9	Slc16a10	128.407	-2.89451	0.295556	-9.79344	1.20137e-22	1.61756e-21	1.2137	1.31587	0.0965095	0.151885
ENSMUSG00000019846.5	Lama4	453.296	-2.57271	0.16819	-15.2964	8.0778e-53	3.61401e-51	2.07706	2.2807	0.30525	0.30683
ENSMUSG00000019866.8	Aim1	291.668	-2.38659	0.200957	-11.8761	1.57523e-32	3.45954e-31	2.10129	2.38749	0.324138	0.381819
ENSMUSG00000019872.7	Smpdl3a	125.541	-2.14223	0.288275	-7.43119	1.07623e-13	8.04037e-13	3.45143	3.36841	0.755891	0.436982
ENSMUSG00000019880.9	Rspo3	71.9023	-2.89811	0.368534	-7.86388	3.72412e-15	3.10852e-14	2.01838	1.66823	0.182563	0.129976
ENSMUSG00000020010.7	Vnn3	18.1313	-2.8685	0.529529	-5.41708	6.05816e-08	2.70655e-07	0.667034	0.661581	0	0.0171818
ENSMUSG00000020051.9	Pah	1073.47	-2.2458	0.126839	-17.706	3.77114e-70	2.77241e-68	26.6188	27.8225	5.3898	4.42497
ENSMUSG00000020053.11	Igf1	139.107	-3.66748	0.308741	-11.8788	1.52492e-32	3.35847e-31	0.864509	0.915811	0.0440536	0.0501823
ENSMUSG00000020176.10	Grb10	86.1977	-2.87691	0.339899	-8.46403	2.58291e-17	2.48346e-16	0.550349	0.595604	0.054506	0.0509322
ENSMUSG00000020182.9	Ddc	1214.96	-3.35615	0.123351	-27.2082	5.20006e-163	1.89367e-160	17.3404	16.9846	1.41249	1.42931
ENSMUSG00000020303.2	Stc2	805.723	-2.62139	0.134617	-19.473	1.86189e-84	1.83367e-82	9.24382	8.86212	1.29096	1.20857
ENSMUSG00000020486.11	42982	928.655	-2.45901	0.13594	-18.0889	3.89583e-73	3.08105e-71	14.8923	14.9266	2.58473	2.02609
ENSMUSG00000020534.8	Shmt1	1190.72	-2.36434	0.11857	-19.9405	1.81344e-88	1.90582e-86	17.2116	17.4763	3.07922	2.69251
ENSMUSG00000020607.6	Fam84a	106.507	-2.77692	0.312075	-8.89825	5.67317e-19	6.16062e-18	1.94839	1.84184	0.230973	0.165756
ENSMUSG00000020620.8	Abca8b	2306.78	-2.5009	0.095917	-26.0736	7.26754e-150	2.10745e-147	17.3926	18.2435	2.70842	2.72052
ENSMUSG00000020774.2	Aspa	928.022	-2.69611	0.127782	-21.0993	8.06518e-99	1.00232e-96	9.72997	9.59772	1.2274	1.31196
ENSMUSG00000021066.8	Atl1	405.593	-2.37149	0.175264	-13.531	1.02633e-41	3.12672e-40	8.30553	8.05457	1.17429	1.46858
ENSMUSG00000021176.4	2610021K21Rik	49.2561	-2.35458	0.398942	-5.90207	3.58973e-09	1.843e-08	1.46715	1.32869	0.180192	0.164636
ENSMUSG00000021280.7	1200009I06Rik	73.758	-2.13883	0.343148	-6.23298	4.57647e-10	2.54124e-09	0.891565	1.0683	0.138976	0.182264
ENSMUSG00000021318.9	Gli3	52.8468	-3.84317	0.450086	-8.53874	1.35689e-17	1.33213e-16	0.324392	0.399138	0.00651127	0.00973495
ENSMUSG00000021336.9	Slc17a4	203.192	-2.79911	0.251382	-11.1349	8.48476e-29	1.5742e-27	4.64528	4.48088	0.363959	0.655323
ENSMUSG00000021364.9	Elovl2	15.4963	-2.44292	0.533463	-4.57936	4.66405e-06	1.66974e-05	0.290083	0.233279	0	0.0161558
ENSMUSG00000021456.7	Fbp2	121.422	-3.87047	0.336755	-11.4934	1.42374e-30	2.86559e-29	5.97162	5.80223	0.306293	0.187871
ENSMUSG00000021591.7	Glrx	2690.48	-2.49297	0.0916421	-27.2033	5.93659e-163	2.11275e-160	116.422	112.735	17.3615	17.7906
ENSMUSG00000021676.8	Iqgap2	126.969	-3.29511	0.306525	-10.7499	5.93261e-27	1.01529e-25	1.45775	1.27827	0.0972196	0.0969015
ENSMUSG00000021708.10	Rasgrf2	322.117	-4.2913	0.244959	-17.5184	1.03647e-68	7.24556e-67	2.33784	2.3837	0.0602396	0.116553
ENSMUSG00000021751.7	Acox2	2929.07	-2.03595	0.0908973	-22.3983	4.08631e-111	6.88038e-109	41.7972	44.0034	8.70032	9.41131
ENSMUSG00000021765.6	Fst	46.9096	-2.56039	0.413652	-6.18972	6.02715e-10	3.30343e-09	1.03402	1.07758	0.127801	0.0810618
ENSMUSG00000021795.8	Sftpd	63.3538	-3.22426	0.398719	-8.08655	6.13804e-16	5.41191e-15	3.21554	2.53799	0.134755	0.201472
ENSMUSG00000021811.6	Dnajc9	976.268	-2.40639	0.129724	-18.5501	8.14157e-77	6.9172e-75	34.4402	33.6281	5.991	4.96027
ENSMUSG00000021998.10	Lcp1	50.5417	-4.191	0.471718	-8.88456	6.41758e-19	6.95452e-18	0.365425	0.343177	0.00328475	0.00327401
ENSMUSG00000022150.9	Dab2	735.283	-3.86623	0.16244	-23.8009	3.26501e-125	7.10093e-123	6.12473	6.54563	0.314649	0.398382
ENSMUSG00000022157.7	Mcpt8	22.3854	-2.2786	0.504085	-4.52028	6.17586e-06	2.17614e-05	1.48351	1.75164	0.0365126	0.218359
ENSMUSG00000022309.8	Angpt1	97.6094	-3.71161	0.356573	-10.4091	2.2531e-25	3.51757e-24	1.48303	1.45449	0.0660161	0.0658001
ENSMUSG00000022324.7	Matn2	320.764	-4.34638	0.242766	-17.9036	1.10611e-71	8.5323e-70	5.84084	5.65291	0.224903	0.18968
ENSMUSG00000022391.8	Rangap1	3756.8	-2.36313	0.0844712	-27.9756	3.22226e-172	1.32782e-169	66.6356	65.4844	11.1612	11.0665
ENSMUSG00000022468.5	Endou	55.4299	-3.17568	0.410849	-7.72954	1.07933e-14	8.74805e-14	1.27778	1.29794	0.0689145	0.0801373
ENSMUSG00000022479.9	Vdr	47.9183	-3.19288	0.432579	-7.38103	1.57067e-13	1.15687e-12	0.566584	0.512471	0.0221014	0.0330437
ENSMUSG00000022583.6	Ly6f	15.8246	-2.17751	0.526999	-4.1319	3.59772e-05	0.000115871	1.20524	1.06257	0.0355967	0.106441
ENSMUSG00000022754.5	Tmem45a	137.202	-3.64671	0.309322	-11.7894	4.42845e-32	9.51236e-31	2.7769	2.91864	0.153231	0.15273
ENSMUSG00000022836.9	Mylk	1429.62	-2.15944	0.112319	-19.2259	2.2478e-82	2.12038e-80	7.3497	7.49218	1.31275	1.54556
ENSMUSG00000022883.9	Robo1	198.8	-3.6786	0.279742	-13.15	1.70174e-39	4.88945e-38	1.22103	1.41533	0.0457794	0.101037
ENSMUSG00000022894.5	Adamts5	63.8749	-2.91245	0.388877	-7.48938	6.92001e-14	5.24748e-13	0.403114	0.571757	0.038584	0.0384577
ENSMUSG00000023033.7	Scn8a	185.925	-2.46704	0.244967	-10.0709	7.42803e-24	1.0681e-22	0.933345	1.01053	0.115665	0.163088
ENSMUSG00000023070.6	Rgn	79.3444	-4.21206	0.417049	-10.0997	5.54212e-24	8.0207e-23	3.55183	2.94084	0.116559	0.0193629
ENSMUSG00000023150.8	Ivns1abp	15847.8	-2.11055	0.0736538	-28.6549	1.39096e-180	6.60033e-178	173.849	170.595	35.6125	33.6366
ENSMUSG00000023206.9	Il15ra	176.068	-2.09776	0.240905	-8.70782	3.09761e-18	3.18069e-17	2.21476	2.52155	0.40937	0.483592
ENSMUSG00000023224.6	Serping1	55.641	-3.39872	0.425645	-7.98486	1.40676e-15	1.21302e-14	1.35088	1.71774	0.0939906	0.0401499
ENSMUSG00000023341.8	Mx2	33.6353	-2.31409	0.449338	-5.14999	2.60499e-07	1.08029e-06	0.799669	0.867486	0.103329	0.0772432
ENSMUSG00000023800.7	Tiam2	270.241	-2.03691	0.198924	-10.2396	1.31747e-24	1.98942e-23	2.0935	2.20069	0.403783	0.46577
ENSMUSG00000023826.7	Park2	32.1864	-2.17469	0.450327	-4.82914	1.37123e-06	5.24222e-06	1.18542	1.18195	0.136155	0.155096
ENSMUSG00000023885.7	Thbs2	89.676	-3.68538	0.37348	-9.86767	5.74834e-23	7.84771e-22	1.00378	0.937735	0.0210685	0.0629988
ENSMUSG00000023918.6	Gpr115	19.4105	-2.33281	0.514562	-4.53359	5.799e-06	2.04935e-05	0.40464	0.391543	0.0102021	0.0406747
ENSMUSG00000024039.8	Cbs	197.213	-3.52031	0.265178	-13.2753	3.22037e-40	9.3558e-39	3.76709	3.63375	0.186768	0.288543
ENSMUSG00000024066.7	Xdh	5435.28	-3.82981	0.0855806	-44.7509	0	0	72.9576	72.9391	4.48447	4.33716
ENSMUSG00000024084.6	Qpct	391.678	-2.38463	0.173577	-13.7382	5.99635e-43	1.92412e-41	11.6311	11.5377	1.89841	1.81134
ENSMUSG00000024109.10	Nrxn1	41.0316	-2.69258	0.438055	-6.14668	7.91236e-10	4.29461e-09	0.171522	0.166784	0.00834379	0.0187121
ENSMUSG00000024112.9	Cacna1h	529.644	-3.56582	0.177318	-20.1097	6.07081e-90	6.60159e-88	3.21191	3.54301	0.213693	0.251142
ENSMUSG00000024155.7	4930528F23Rik	105.215	-4.45284	0.389492	-11.4324	2.87931e-30	5.74359e-29	3.81268	4.31893	0.0366627	0.1279
ENSMUSG00000024164.8	C3	15133	-2.78903	0.0712341	-39.1531	0	0	173.032	174.214	21.8625	21.694
ENSMUSG00000024292.7	Cyp4f14	113.423	-3.88007	0.345279	-11.2375	2.66925e-29	5.04195e-28	3.47616	3.16459	0.127827	0.141566
ENSMUSG00000024338.8	Psmb8	149.164	-3.13035	0.285878	-10.95	6.64718e-28	1.18958e-26	2.98026	3.72224	0.285255	0.272949
ENSMUSG00000024339.6	Tap2	111.765	-2.9586	0.30872	-9.58345	9.3858e-22	1.20667e-20	1.78117	1.82206	0.165132	0.164592
ENSMUSG00000024349.8	Tmem173	75.7226	-2.05646	0.338385	-6.07727	1.22246e-09	6.5489e-09	1.83666	1.85056	0.257666	0.391993
ENSMUSG00000024371.6	C2	362.752	-2.4668	0.18135	-13.6024	3.87569e-42	1.20177e-40	5.11889	5.1492	0.81526	0.728267
ENSMUSG00000024388.10	Myo7b	38.4487	-2.29405	0.436834	-5.25153	1.50841e-07	6.41728e-07	0.278236	0.412182	0.0377203	0.0422965
ENSMUSG00000024621.8	Csf1r	12.3783	-2.13271	0.54015	-3.94837	7.86855e-05	0.000241217	0.190591	0.114565	0.00597022	0.00595069
ENSMUSG00000024694.3	Keg1	268.232	-5.1035	0.301698	-16.9159	3.43325e-64	2.14188e-62	3.06052	3.19062	0.0496053	0.0604304
ENSMUSG00000024897.7	Apba1	15.257	-2.41493	0.534147	-4.52108	6.15238e-06	2.16836e-05	0.162012	0.125462	0.00905272	0
ENSMUSG00000024986.5	Hhex	1153.39	-2.53916	0.117619	-21.588	2.32865e-103	3.22693e-101	16.9255	17.7072	2.57034	2.52951
ENSMUSG00000024998.9	Plce1	196.72	-3.31929	0.257605	-12.8852	5.45237e-38	1.47714e-36	1.23659	1.31745	0.0817318	0.110792
ENSMUSG00000025002.5	Cyp2c55	22.0699	-2.09331	0.494028	-4.23723	2.26299e-05	7.46338e-05	0.711478	0.617245	0.0782413	0.0623883
ENSMUSG00000025004.8	Cyp2c40	22.2949	-2.46315	0.513318	-4.79849	1.59869e-06	6.07053e-06	0.83024	0.555503	0.0766281	0
ENSMUSG00000025026.8	Add3	326.384	-2.55153	0.189555	-13.4607	2.66553e-41	8.0423e-40	3.87132	3.79451	0.537374	0.541918
ENSMUSG00000025059.10	Gyk	1926.93	-3.64566	0.115258	-31.6304	1.41299e-219	1.00573e-216	15.8079	15.2888	1.1531	0.956431
ENSMUSG00000025069.7	Gsto2	56.0649	-2.50759	0.387445	-6.47212	9.66369e-11	5.62751e-10	2.03772	1.82336	0.180036	0.251226
ENSMUSG00000025175.6	Fn3k	55.7736	-2.25044	0.383734	-5.86459	4.50256e-09	2.28174e-08	0.693385	0.779259	0.0780635	0.127322
ENSMUSG00000025196.4	Cpn1	194.766	-4.62443	0.317238	-14.5772	3.92369e-48	1.50961e-46	3.75043	3.16749	0.101578	0.0674971
ENSMUSG00000025227.8	Tmem180	148.191	-2.53581	0.283742	-8.93706	3.99662e-19	4.37338e-18	3.18802	3.0029	0.267204	0.543756
ENSMUSG00000025395.7	Prim1	385.14	-2.53359	0.182005	-13.9204	4.76133e-44	1.58297e-42	6.00248	5.52964	0.735213	0.918023
ENSMUSG00000025422.7	Agap2	79.7706	-3.58435	0.380991	-9.40798	5.05786e-21	6.28081e-20	0.884608	0.927596	0.0277102	0.055239
ENSMUSG00000025431.4	Crisp1	92.4178	-3.15752	0.342343	-9.22327	2.88168e-20	3.38329e-19	4.37217	3.73708	0.286609	0.307646
ENSMUSG00000025498.7	Irf7	41.9236	-2.3893	0.441308	-5.41413	6.1586e-08	2.74908e-07	0.809196	0.858727	0.0309808	0.144104
ENSMUSG00000025574.7	Tk1	706.128	-2.31769	0.136877	-16.9326	2.58668e-64	1.6267e-62	7.65167	7.65122	1.27324	1.3409
ENSMUSG00000025576.10	Rbfox3	13.9114	-2.49128	0.538499	-4.62635	3.72175e-06	1.34905e-05	0.15567	0.160116	0	0.00534642
ENSMUSG00000025887.3	Casp12	154.363	-3.18935	0.281379	-11.3347	8.8309e-30	1.7072e-28	2.57902	2.43863	0.238622	0.164028
ENSMUSG00000025969.9	Nrp2	835.945	-2.9288	0.136442	-21.4656	3.26395e-102	4.36839e-100	5.42132	5.08195	0.581096	0.585739
ENSMUSG00000026072.6	Il1r1	741.871	-2.14496	0.134451	-15.9534	2.69716e-57	1.3985e-55	7.89046	8.29397	1.49423	1.63089
ENSMUSG00000026147.9	Col9a1	43.7591	-3.33865	0.451838	-7.38904	1.47887e-13	1.09183e-12	0.536548	0.565299	0.0121899	0.030375
ENSMUSG00000026149.2	Tm4sf20	74.0136	-3.67604	0.397779	-9.24142	2.43258e-20	2.87702e-19	3.12414	3.20011	0.186316	0.0619022
ENSMUSG00000026208.9	Des	9.56073	-2.16063	0.544158	-3.9706	7.16931e-05	0.000221036	0.201119	0.141848	0	0
ENSMUSG00000026295.5	Spp2	1589.89	-6.80502	0.21386	-31.82	3.4199e-222	2.5501e-219	117.839	111.212	0.740089	0.704137
ENSMUSG00000026348.6	Acmsd	25.5197	-3.17704	0.509789	-6.23205	4.60361e-10	2.5545e-09	0.695006	0.765915	0.027111	0
ENSMUSG00000026360.3	Rgs2	123.148	-2.60264	0.297169	-8.75812	1.98541e-18	2.07264e-17	1.79018	2.22058	0.292645	0.197318
ENSMUSG00000026365.9	Cfh	743.791	-5.89677	0.235064	-25.0858	7.11038e-139	1.76733e-136	7.14892	7.27601	0.0637852	0.104447
ENSMUSG00000026398.8	Nr5a2	188.847	-2.70387	0.251243	-10.7619	5.20577e-27	8.93829e-26	2.88144	2.94984	0.268562	0.429916
ENSMUSG00000026405.8	C4bp	617.418	-3.40068	0.160254	-21.2205	6.17029e-100	7.98518e-98	12.6343	12.2821	0.999148	0.955231
ENSMUSG00000026463.10	Atp2b4	388.072	-3.4732	0.195852	-17.7338	2.29805e-70	1.70546e-68	2.73998	2.6066	0.197124	0.189586
ENSMUSG00000026542.5	Apcs	720.596	-3.24164	0.149222	-21.7236	1.22861e-104	1.76502e-102	43.2262	46.4176	3.93801	3.98844
ENSMUSG00000026655.7	Fam107b	3314.64	-2.11293	0.0863446	-24.4709	3.01468e-132	7.04579e-130	51.0709	49.7232	10.1981	9.98342
ENSMUSG00000026811.10	St6galnac6	853.396	-2.65031	0.138582	-19.1245	1.57846e-81	1.44544e-79	10.3113	10.3611	1.54957	1.24077
ENSMUSG00000026896.7	Ifih1	422.309	-2.10631	0.173125	-12.1664	4.69351e-34	1.10188e-32	3.97815	4.44433	0.905042	0.738579
ENSMUSG00000026986.8	Hnmt	80.7228	-4.71612	0.440283	-10.7116	8.98289e-27	1.5174e-25	3.24364	2.84085	0.0176474	0.0351794
ENSMUSG00000027078.7	Ube2l6	62.158	-3.34884	0.403447	-8.30058	1.03607e-16	9.54903e-16	2.02745	1.93418	0.0782021	0.124714
ENSMUSG00000027188.8	Pamr1	2558.32	-2.68066	0.0940147	-28.5132	8.03721e-179	3.59585e-176	24.2059	25.1783	3.29945	3.34012
ENSMUSG00000027514.8	Zbp1	19.8048	-2.66164	0.517869	-5.1396	2.75325e-07	1.13725e-06	0.376537	0.348938	0.00884621	0.0176345
ENSMUSG00000027562.7	Car2	216.65	-3.09423	0.241957	-12.7884	1.90461e-37	5.03787e-36	7.2588	7.51571	0.558404	0.782687
ENSMUSG00000027570.8	Col9a3	93.9879	-2.29666	0.320327	-7.16973	7.51461e-13	5.26023e-12	1.55193	1.25247	0.170149	0.250351
ENSMUSG00000027574.9	Nkain4	79.2777	-2.47	0.338954	-7.28713	3.16633e-13	2.28381e-12	3.68055	3.84117	0.529124	0.426937
ENSMUSG00000027639.9	Samhd1	356.558	-2.08235	0.177162	-11.754	6.73901e-32	1.43378e-30	2.2104	2.06508	0.416062	0.431697
ENSMUSG00000027750.9	Postn	690.714	-4.76806	0.189922	-25.1054	4.34688e-139	1.09787e-136	5.71018	5.77899	0.151352	0.178646
ENSMUSG00000027820.6	Mme	264.001	-2.71129	0.215475	-12.5829	2.62293e-36	6.71118e-35	3.40689	3.70889	0.491907	0.383711
ENSMUSG00000027831.8	Veph1	175.761	-2.08605	0.45631	-4.57156	4.84096e-06	1.72754e-05	1.52303	1.5877	0.118197	0.296883
ENSMUSG00000027875.6	Hmgcs2	1971.99	-5.41631	0.145449	-37.2385	1.62688e-303	2.31594e-300	37.4517	41.5357	0.749619	0.756624
ENSMUSG00000027950.3	Chrnb2	48.4046	-2.55446	0.40739	-6.27031	3.60327e-10	2.02235e-09	0.516047	0.568698	0.0579835	0.0520144
ENSMUSG00000027955.10	Fam198b	77.9858	-3.69665	0.387675	-9.53544	1.49258e-21	1.90328e-20	0.707779	0.70951	0.0220375	0.0351446
ENSMUSG00000028011.9	Tdo2	8.84205	-2.05283	0.543364	-3.778	0.000158092	0.000463501	0.187821	0.12074	0	0
ENSMUSG00000028015.2	Ctso	1129.95	-4.22434	0.144225	-29.2899	1.39625e-188	7.28796e-186	16.1665	15.5016	0.628052	0.775692
ENSMUSG00000028088.8	Fmo5	70.4216	-2.62777	0.364191	-7.21536	5.379e-13	3.80785e-12	0.808881	0.680285	0.0605112	0.0986944
ENSMUSG00000028158.8	Mttp	111.56	-2.01948	0.28664	-7.04536	1.84978e-12	1.26103e-11	1.47918	1.31314	0.254843	0.282233
ENSMUSG00000028167.9	Bdh2	55.9812	-3.60649	0.431035	-8.36706	5.90759e-17	5.54598e-16	2.7386	3.29489	0.12986	0.077661
ENSMUSG00000028172.4	Tacr3	22.3202	-2.31002	0.49968	-4.623	3.78225e-06	1.37003e-05	0.361052	0.371363	0.0165878	0.0413339
ENSMUSG00000028217.5	Cdh17	1271.21	-3.27156	0.120658	-27.1143	6.67027e-162	2.32111e-159	17.638	17.1241	1.54207	1.51616
ENSMUSG00000028270.6	Gbp2	212.048	-4.51572	0.297836	-15.1618	6.33305e-52	2.7547e-50	5.55747	5.43663	0.186119	0.123673
ENSMUSG00000028307.9	Aldob	3371.35	-4.16348	0.103655	-40.1668	0	0	91.0292	88.9771	4.63315	3.91554
ENSMUSG00000028356.4	Ambp	9260	-2.13415	0.0897049	-23.7908	4.15947e-125	8.92234e-123	360.214	361.912	76.9933	65.302
ENSMUSG00000028399.10	Ptprd	22.0365	-2.02082	0.504165	-4.00826	6.11689e-05	0.000190162	0.0358071	0.0803823	0.00685453	0.00546569
ENSMUSG00000028434.6	Epb4.1l4b	13.7409	-2.65401	0.541493	-4.90128	9.52132e-07	3.70881e-06	0.088643	0.12023	0	0
ENSMUSG00000028517.8	Ppap2b	813.442	-2.05292	0.12883	-15.9351	3.61561e-57	1.86854e-55	13.9767	14.0752	2.75717	3.0338
ENSMUSG00000028553.6	Angptl3	102.832	-4.41983	0.390464	-11.3194	1.05164e-29	2.03054e-28	2.05832	1.71984	0.0523212	0.026075
ENSMUSG00000028766.4	Alpl	305.94	-3.77259	0.22523	-16.7499	5.67022e-63	3.46836e-61	4.78497	4.81104	0.278666	0.262323
ENSMUSG00000029108.7	Pcdh7	582.709	-2.70521	0.152292	-17.7633	1.36021e-70	1.01912e-68	5.54932	5.47176	0.729634	0.692139
ENSMUSG00000029162.9	Khk	724.074	-2.15894	0.138394	-15.5999	7.28955e-55	3.56709e-53	23.7441	24.1737	4.91641	4.22956
ENSMUSG00000029195.7	Klb	987.291	-3.97755	0.145362	-27.3631	7.53948e-165	2.81097e-162	17.9509	18.2451	1.02739	0.880307
ENSMUSG00000029245.9	Epha5	30.8027	-2.179	0.456168	-4.77676	1.78146e-06	6.72191e-06	0.174601	0.189098	0.0217831	0.0217118
ENSMUSG00000029298.8	Gbp9	1539.25	-2.98037	0.112763	-26.4304	6.13557e-154	1.92154e-151	25.2706	25.4945	2.56071	2.93775
ENSMUSG00000029304.8	Spp1	12129.8	-3.24343	0.0815247	-39.7846	0	0	451.882	445.661	43.1714	38.612
ENSMUSG00000029368.9	Alb	3342.66	-4.80311	0.110517	-43.4602	0	0	111.192	101.766	3.28533	3.15274
ENSMUSG00000029369.10	Afm	897.846	-6.0765	0.226227	-26.8602	6.40924e-159	2.13537e-156	19.8716	19.456	0.174691	0.235573
ENSMUSG00000029372.6	Ppbp	17.9776	-2.10304	0.515549	-4.07922	4.51867e-05	0.000143351	1.11852	0.924477	0.115623	0.0576225
ENSMUSG00000029414.7	Kntc1	335.536	-2.03992	0.187047	-10.9059	1.08017e-27	1.90478e-26	2.65513	2.61048	0.600955	0.469357
ENSMUSG00000029561.10	Oasl2	27.4984	-3.65788	0.517289	-7.07123	1.53562e-12	1.05235e-11	0.482453	0.471648	0	0
ENSMUSG00000029716.8	Trfr2	931.987	-3.67796	0.146874	-25.0417	2.14955e-138	5.25934e-136	20.4188	19.4889	1.11989	1.47767
ENSMUSG00000029798.8	Herc6	475.466	-2.66895	0.169901	-15.7088	1.3163e-55	6.5853e-54	4.89458	5.40627	0.733529	0.61599
ENSMUSG00000029859.4	Epha1	134.638	-3.12663	0.29164	-10.7208	8.1266e-27	1.37871e-25	2.5282	2.53193	0.200301	0.218659
ENSMUSG00000029923.4	Rab19	48.5563	-3.10825	0.432119	-7.19304	6.33637e-13	4.45938e-12	2.12838	1.775	0.0594634	0.15805
ENSMUSG00000030020.7	Prickle2	49.87	-3.64993	0.447155	-8.16256	3.28007e-16	2.94173e-15	0.402107	0.350653	0.0108434	0.010808
ENSMUSG00000030107.9	Usp18	37.8503	-2.82618	0.450534	-6.27295	3.54266e-10	1.99119e-09	1.21141	1.46663	0.0881873	0.0878987
ENSMUSG00000030157.5	Clec2d	1706.85	-2.56575	0.108259	-23.7	3.60408e-124	7.42582e-122	79.2718	83.2441	12.4564	11.1074
ENSMUSG00000030513.7	Pcsk6	522.71	-2.49651	0.164862	-15.143	8.42872e-52	3.63596e-50	7.06411	7.2237	0.904448	1.21923
ENSMUSG00000030621.10	Me3	42.1017	-2.58645	0.430733	-6.00475	1.91628e-09	1.00695e-08	0.171403	0.179788	0.0106736	0.0212775
ENSMUSG00000030671.8	Pde3b	159.422	-4.04604	0.308562	-13.1125	2.7908e-39	7.96013e-38	1.45769	1.51958	0.0588256	0.0586331
ENSMUSG00000030761.9	Myo7a	1000.14	-2.37047	0.124274	-19.0745	4.11048e-81	3.72058e-79	6.39146	6.89519	1.05111	1.14623
ENSMUSG00000030834.5	Abcc6	151.728	-5.06599	0.378763	-13.3751	8.45327e-41	2.51176e-39	2.0078	1.68235	0.00571764	0.0398925
ENSMUSG00000030895.8	Hpx	3557.86	-3.04952	0.0904821	-33.703	5.21715e-249	4.80561e-246	147.383	142.289	15.5247	14.6107
ENSMUSG00000030921.9	Trim30a	25.2451	-2.50369	0.489997	-5.1096	3.22837e-07	1.32442e-06	0.180035	0.219511	0.0118791	0.015787
ENSMUSG00000031129.9	Slc9a9	337.519	-2.02066	0.180042	-11.2233	3.13492e-29	5.9002e-28	3.25452	3.21736	0.637669	0.701333
ENSMUSG00000031271.8	Serpina7	17.0724	-2.44151	0.525331	-4.64757	3.35865e-06	1.22395e-05	0.419444	0.475834	0.0255051	0.0127108
ENSMUSG00000031596.9	Slc7a2	35.1636	-2.78113	0.463398	-6.00159	1.9539e-09	1.02603e-08	0.191746	0.291461	0.0136697	0.0170313
ENSMUSG00000031613.8	Hpgd	154.558	-4.06721	0.321659	-12.6445	1.20036e-36	3.09662e-35	5.77999	5.8276	0.326893	0.108608
ENSMUSG00000031645.3	F11	42.9246	-2.00315	0.417455	-4.79848	1.59875e-06	6.07053e-06	1.02282	1.15683	0.111295	0.235728
ENSMUSG00000031722.9	Hp	246.411	-3.79691	0.259498	-14.6318	1.76188e-48	6.82901e-47	13.2898	10.0116	0.58113	0.648736
ENSMUSG00000031762.6	Mt2	1039.41	-2.29682	0.125123	-18.3565	2.93104e-75	2.42842e-73	98.4759	111.456	17.7428	18.804
ENSMUSG00000031778.6	Cx3cl1	23.1928	-2.46607	0.50139	-4.91846	8.72267e-07	3.41641e-06	0.317637	0.466726	0.0336767	0.0167833
ENSMUSG00000031780.1	Ccl17	40.8092	-3.85861	0.485021	-7.95556	1.78325e-15	1.52423e-14	4.47407	6.09831	0.0608544	0.0606553
ENSMUSG00000031790.6	Mmp15	164.218	-2.05946	0.248452	-8.28915	1.14062e-16	1.05003e-15	2.00037	2.16619	0.452335	0.350665
ENSMUSG00000031827.6	Cotl1	603.775	-2.49875	0.15541	-16.0785	3.6126e-58	1.93071e-56	21.0547	21.6082	3.56671	2.79052
ENSMUSG00000031828.8	Klhl36	166.371	-2.37509	0.254887	-9.31822	1.18307e-20	1.43721e-19	4.04829	4.86549	0.74364	0.610406
ENSMUSG00000031842.7	Pde4c	457.952	-2.06498	0.161451	-12.7902	1.86112e-37	4.93119e-36	4.65118	4.38147	0.855758	0.970802
ENSMUSG00000031881.4	Cdh16	378.153	-3.13304	0.190173	-16.4747	5.57967e-61	3.18876e-59	6.76472	7.11377	0.668224	0.619134
ENSMUSG00000031897.8	Psmb10	714.285	-2.03698	0.135323	-15.0527	3.31643e-51	1.41119e-49	29.5342	31.6302	6.41573	6.32123
ENSMUSG00000031910.7	Has3	33.787	-3.29468	0.483972	-6.80758	9.92534e-12	6.34889e-11	0.418877	0.326507	0.0158415	0.00526322
ENSMUSG00000031980.9	Agt	695.484	-2.09774	0.13686	-15.3276	4.99817e-53	2.26859e-51	19.6116	20.7149	3.8961	4.14663
ENSMUSG00000032053.7	Pou2af1	13.1275	-2.40307	0.540153	-4.44887	8.63222e-06	3.00115e-05	0.376617	0.298311	0.0121661	0
ENSMUSG00000032066.9	Bco2	42.7698	-3.01314	0.441473	-6.82519	8.78064e-12	5.65595e-11	1.18347	1.36707	0.0884371	0.0587652
ENSMUSG00000032204.7	Aqp9	18.9045	-2.45088	0.516675	-4.74356	2.0999e-06	7.86095e-06	0.298865	0.281159	0.0150704	0.0150211
ENSMUSG00000032313.5	AI118078	18.5149	-2.38755	0.520685	-4.5854	4.53108e-06	1.62568e-05	0.301103	0.197682	0.00662246	0.0198024
ENSMUSG00000032332.10	Col12a1	2547.44	-2.14475	0.0931197	-23.0321	2.221e-117	4.19019e-115	9.03342	9.37591	1.73025	1.86967
ENSMUSG00000032348.5	Gsta4	704.649	-2.13797	0.136815	-15.6268	4.78397e-55	2.35573e-53	40.74	40.4104	8.22049	7.5108
ENSMUSG00000032377.7	Plscr4	34.4121	-2.06778	0.441086	-4.68794	2.75974e-06	1.01754e-05	0.423151	0.437627	0.0471067	0.0737826
ENSMUSG00000032454.3	Rbp2	189.284	-2.53347	0.239519	-10.5773	3.79779e-26	6.17545e-25	17.0324	15.7491	2.36925	2.12997
ENSMUSG00000032500.8	Dclk3	167.335	-2.71261	0.27281	-9.94324	2.6989e-23	3.74332e-22	2.46055	3.22536	0.401608	0.257967
ENSMUSG00000032596.7	Uba7	766.881	-2.57137	0.135758	-18.9408	5.25971e-80	4.70639e-78	13.7212	14.322	1.98258	2.02525
ENSMUSG00000032607.6	Amt	288.552	-2.72841	0.205345	-13.287	2.75562e-40	8.02048e-39	10.1611	9.81268	1.33584	1.11259
ENSMUSG00000032640.8	Chsy1	927.209	-2.08818	0.125323	-16.6624	2.4594e-62	1.48694e-60	11.8568	12.4914	2.56968	2.33726
ENSMUSG00000032649.8	Glt25d2	613.003	-3.09744	0.158039	-19.5991	1.57229e-85	1.58842e-83	8.40904	9.08667	0.904558	0.798978
ENSMUSG00000032661.8	Oas3	26.2416	-2.66613	0.491714	-5.42212	5.88977e-08	2.63508e-07	0.265774	0.369296	0.0179175	0.0178589
ENSMUSG00000032841.9	Prr5l	22.6884	-2.32663	0.499316	-4.65964	3.16758e-06	1.15836e-05	0.310086	0.254617	0.0314257	0.0125292
ENSMUSG00000033096.7	2310001A20Rik	947.53	-2.55135	0.129317	-19.7294	1.20549e-86	1.24189e-84	22.1525	22.9048	3.51013	3.03729
ENSMUSG00000033152.7	Podxl2	96.5113	-3.05444	0.332545	-9.18503	4.11397e-20	4.78964e-19	1.46104	1.5511	0.102796	0.141867
ENSMUSG00000033208.7	S100b	119.658	-4.816	0.395117	-12.1888	3.5669e-34	8.42444e-33	4.70094	5.98792	0.0841463	0.0629033
ENSMUSG00000033318.6	Gstt2	408.709	-2.7304	0.177465	-15.3856	2.04601e-53	9.42306e-52	18.3404	16.8106	2.14198	2.24854
ENSMUSG00000033355.5	Rtp4	18.2247	-3.05694	0.533932	-5.72534	1.03228e-08	5.01848e-08	0.883153	0.677049	0	0
ENSMUSG00000033377.8	Palmd	1227.73	-3.80652	0.13115	-29.0241	3.26552e-185	1.59796e-182	19.6712	20.9099	1.2448	1.19175
ENSMUSG00000033538.7	Casp4	19.9007	-2.02874	0.504784	-4.01902	5.84418e-05	0.000182517	0.268625	0.376768	0.0336585	0.0335484
ENSMUSG00000033685.5	Ucp2	98.9209	-2.15812	0.319486	-6.75498	1.42859e-11	8.98406e-11	0.833729	0.766453	0.0893099	0.178036
ENSMUSG00000034459.8	Ifit1	193.159	-5.60693	0.379807	-14.7626	2.55284e-49	1.025e-47	5.02575	4.68643	0.0587694	0.0117154
ENSMUSG00000034528.9	Hsd17b13	83.7149	-2.91022	0.346997	-8.38685	4.99326e-17	4.71304e-16	2.47816	2.26812	0.246041	0.173108
ENSMUSG00000034706.9	Dnaic2	78.2712	-3.85782	0.394656	-9.77516	1.43926e-22	1.92792e-21	0.881081	0.935233	0.0279383	0.0334163
ENSMUSG00000035041.8	Creb3l3	228.957	-4.72349	0.299071	-15.7939	3.42989e-56	1.72696e-54	5.00663	4.94362	0.134562	0.10317
ENSMUSG00000035131.8	Fam5c	198.301	-4.82724	0.323246	-14.9336	1.99111e-50	8.38141e-49	2.12197	2.1323	0.0508939	0.0355091
ENSMUSG00000035186.6	Ubd	26.8223	-3.43481	0.511935	-6.70946	1.95341e-11	1.21431e-10	1.94629	1.89463	0.033532	0
ENSMUSG00000035270.9	Impg2	21.1031	-2.4761	0.507413	-4.87985	1.06168e-06	4.10998e-06	0.140011	0.147119	0.0100976	0.00670968
ENSMUSG00000035429.7	Ptprh	11.3773	-2.37518	0.54415	-4.36494	1.27157e-05	4.33141e-05	0.240278	0.140671	0	0
ENSMUSG00000035451.6	Foxa1	173.984	-2.10582	0.242617	-8.67961	3.9714e-18	4.03819e-17	3.0882	2.96482	0.489622	0.644186
ENSMUSG00000035472.7	Slc25a21	31.3909	-2.52037	0.468595	-5.37857	7.50779e-08	3.32197e-07	0.452717	0.353392	0.0194992	0.0453494
ENSMUSG00000035540.7	Gc	20252.9	-4.67502	0.0909979	-51.375	0	0	795.405	781.249	28.8572	23.8507
ENSMUSG00000035692.6	Isg15	20.8431	-2.1856	0.506765	-4.31284	1.61172e-05	5.41936e-05	1.3582	2.02505	0.0825881	0.205795
ENSMUSG00000035811.8	Ugt2b35	471.341	-2.10457	0.170423	-12.3491	4.92517e-35	1.19943e-33	7.84616	7.8031	1.28114	1.78397
ENSMUSG00000035835.7	BC005764	107.98	-3.15246	0.321275	-9.81235	9.96253e-23	1.34718e-21	1.45559	1.61174	0.107476	0.12855
ENSMUSG00000035852.4	9130017N09Rik	22.6064	-2.82775	0.51316	-5.51046	3.57896e-08	1.643e-07	0.6193	0.562047	0	0.0375346
ENSMUSG00000035877.8	Zhx3	455.943	-2.89463	0.177445	-16.3128	7.99854e-60	4.37934e-58	2.4121	2.60608	0.313477	0.243655
ENSMUSG00000036339.10	6720456H20Rik	564.78	-2.6053	0.157696	-16.521	2.5911e-61	1.49169e-59	3.8022	4.21857	0.510838	0.596561
ENSMUSG00000036611.5	Eepd1	599.976	-2.0369	0.143161	-14.228	6.13883e-46	2.20984e-44	11.0613	11.1807	2.36132	2.25817
ENSMUSG00000036813.4	Entpd8	27.2743	-2.73256	0.488082	-5.59856	2.16139e-08	1.01272e-07	0.611111	0.661216	0.045943	0.0228964
ENSMUSG00000036892.6	Prodh2	806.399	-4.30023	0.167495	-25.6738	2.29441e-145	6.1945e-143	21.4679	20.7077	0.723645	1.01232
ENSMUSG00000037053.5	Azgp1	24.8126	-2.2704	0.485473	-4.67666	2.91582e-06	1.071e-05	1.05643	1.24014	0.118701	0.0946499
ENSMUSG00000037106.7	Fer1l6	498.414	-2.30401	0.16334	-14.1056	3.50695e-45	1.23405e-43	3.3451	3.38716	0.639934	0.507288
ENSMUSG00000037108.7	Zcwpw1	263.325	-2.26515	0.213153	-10.6269	2.23499e-26	3.67237e-25	5.69295	5.98564	1.16715	0.820457
ENSMUSG00000037224.8	Zfyve28	37.4533	-2.12702	0.435985	-4.87865	1.06815e-06	4.13401e-06	0.377564	0.370488	0.0320791	0.0692773
ENSMUSG00000037254.11	Itih2	3584.11	-4.4256	0.0999467	-44.2796	0	0	68.4545	69.9035	2.65688	2.82535
ENSMUSG00000037379.4	Spon2	624.669	-2.18547	0.141844	-15.4076	1.45481e-53	6.80026e-52	15.4847	15.4876	2.90273	2.89323
ENSMUSG00000037437.11	Adam32	58.012	-2.27568	0.376822	-6.03912	1.54957e-09	8.21973e-09	1.12671	1.11972	0.12479	0.186573
ENSMUSG00000037780.2	Mbl1	40.3636	-3.70921	0.47782	-7.76278	8.30861e-15	6.80107e-14	3.14106	2.63221	0.0338226	0.067424
ENSMUSG00000037788.7	Vopp1	4064.59	-2.10577	0.083211	-25.3063	2.71978e-141	6.98182e-139	23.1808	22.61	4.6723	4.54812
ENSMUSG00000037798.6	Mat1a	70.3851	-3.61908	0.397331	-9.10849	8.35345e-20	9.54793e-19	1.43092	1.39017	0.0583883	0.0581973
ENSMUSG00000037813.7	D630003M21Rik	525.44	-4.24437	0.195799	-21.6772	3.36541e-104	4.74766e-102	6.55595	6.6771	0.318055	0.231664
ENSMUSG00000037921.8	Ddx60	17.6674	-3.02202	0.534612	-5.65272	1.57926e-08	7.51888e-08	0.165575	0.177666	0	0
ENSMUSG00000037942.3	Crp	2509.75	-2.39132	0.0929501	-25.7269	5.84624e-146	1.63476e-143	84.8196	82.6738	13.9729	13.5973
ENSMUSG00000038065.6	2410066E13Rik	614.959	-2.17274	0.158252	-13.7297	6.74538e-43	2.16004e-41	6.82367	6.32002	1.41436	1.0498
ENSMUSG00000038224.6	Serpinf2	173.485	-3.64275	0.283087	-12.868	6.81779e-38	1.84387e-36	5.04199	4.39644	0.282093	0.254392
ENSMUSG00000038233.7	Fam198a	21.146	-2.72252	0.51723	-5.26366	1.41216e-07	6.02536e-07	0.400424	0.326546	0	0.0247543
ENSMUSG00000038286.9	Bphl	1232.03	-2.23611	0.113989	-19.6169	1.10916e-85	1.12781e-83	55.5416	55.4238	10.5491	9.68449
ENSMUSG00000038298.8	Pdzk1	19.0906	-2.39861	0.52139	-4.60042	4.21633e-06	1.51953e-05	0.373678	0.308852	0.0351162	0
ENSMUSG00000038349.8	Plcl1	43.8785	-2.64594	0.428526	-6.17452	6.63639e-10	3.62214e-09	0.673513	0.806372	0.0429767	0.0856722
ENSMUSG00000038415.8	Foxq1	873.947	-2.56372	0.130663	-19.6209	1.02558e-85	1.04964e-83	18.6418	17.4307	2.51886	2.67726
ENSMUSG00000038521.10	C1s	31.7609	-3.68031	0.503518	-7.3092	2.68738e-13	1.94643e-12	0.614384	0.600778	0.00894507	0
ENSMUSG00000038523.4	1700003F12Rik	48.5315	-2.25306	0.407466	-5.52944	3.21249e-08	1.48128e-07	3.46557	2.35287	0.447803	0.318813
ENSMUSG00000038527.9	C1rl	91.2418	-3.79553	0.370638	-10.2405	1.30496e-24	1.97242e-23	2.04678	1.85755	0.0726007	0.0827007
ENSMUSG00000038578.9	Susd1	193.5	-3.55021	0.264652	-13.4146	4.9653e-41	1.48949e-39	2.57264	2.52786	0.163755	0.156691
ENSMUSG00000038641.8	Akr1d1	289.552	-4.62084	0.266942	-17.3103	3.934e-67	2.63259e-65	6.70535	6.25878	0.203551	0.160172
ENSMUSG00000038663.7	Fsd2	44.343	-2.279	0.416362	-5.47359	4.41003e-08	2.00629e-07	0.583538	0.726591	0.101841	0.0624666
ENSMUSG00000038718.7	Pbx3	320.044	-2.25004	0.194438	-11.572	5.71249e-31	1.17391e-29	2.7609	2.85535	0.414683	0.564068
ENSMUSG00000038884.7	A230050P20Rik	62.1714	-2.5737	0.375257	-6.85851	6.9582e-12	4.51174e-11	2.38657	2.03682	0.259689	0.221862
ENSMUSG00000039058.7	Ak5	31.732	-2.53301	0.468312	-5.40881	6.34437e-08	2.82797e-07	0.768868	0.493372	0.0503034	0.0501388
ENSMUSG00000039114.9	Nrn1	67.5307	-3.78515	0.416286	-9.09267	9.66352e-20	1.09925e-18	2.66772	2.29915	0.123742	0.0352391
ENSMUSG00000039419.10	Cntnap2	386.719	-3.30667	0.192008	-17.2215	1.83029e-66	1.20422e-64	3.3677	3.26186	0.256422	0.285906
ENSMUSG00000039438.6	Ttc36	38.0998	-2.04707	0.427235	-4.79143	1.65593e-06	6.27852e-06	3.12277	2.61371	0.367755	0.488735
ENSMUSG00000039653.3	Baat	24.3415	-2.53832	0.498865	-5.08819	3.61503e-07	1.47685e-06	0.824626	0.754442	0.0160836	0.080155
ENSMUSG00000040134.7	Rdh7	126.027	-2.42845	0.302988	-8.015	1.10134e-15	9.56508e-15	3.84884	4.83337	0.795724	0.405783
ENSMUSG00000040204.6	2810417H13Rik	231.466	-2.71625	0.22312	-12.1739	4.27925e-34	1.00917e-32	2.91772	2.76594	0.330798	0.362041
ENSMUSG00000040253.9	Gbp7	343.278	-4.22463	0.230969	-18.2909	9.77227e-75	8.01172e-73	4.06329	3.89639	0.168687	0.151321
ENSMUSG00000040265.9	Dnm3	118.516	-2.26972	0.285624	-7.94652	1.9182e-15	1.63423e-14	0.423732	0.478082	0.0771749	0.0665275
ENSMUSG00000040405.7	Havcr1	16.3998	-2.37915	0.527434	-4.51081	6.45814e-06	2.27152e-05	0.405106	0.504042	0.0270171	0.0134644
ENSMUSG00000040428.10	Plekha4	46.4469	-2.66118	0.422396	-6.30022	2.97231e-10	1.68087e-09	0.72128	0.635896	0.082016	0.0371581
ENSMUSG00000040466.9	Blvrb	143.803	-2.15543	0.274761	-7.84475	4.33809e-15	3.60946e-14	6.57821	4.82507	0.861042	1.1443
ENSMUSG00000040483.9	Xaf1	114.829	-4.42806	0.373147	-11.8668	1.76122e-32	3.84643e-31	1.681	1.53311	0.0332889	0.0398159
ENSMUSG00000040554.4	Aipl1	16.7365	-2.58151	0.52891	-4.88081	1.05654e-06	4.09169e-06	0.353943	0.337345	0.00988859	0.00985624
ENSMUSG00000040564.7	Apoc1	71.041	-3.63119	0.39705	-9.14541	5.94047e-20	6.84992e-19	8.15456	8.86259	0.348808	0.347667
ENSMUSG00000040690.9	Col16a1	611.985	-2.24226	0.144643	-15.502	3.36248e-54	1.60528e-52	5.21229	4.91575	0.892612	0.92657
ENSMUSG00000040740.7	Slc25a34	48.7702	-2.8048	0.420902	-6.66378	2.66865e-11	1.63491e-10	0.950112	1.30881	0.10523	0.0699239
ENSMUSG00000040891.5	Foxa3	344.81	-2.07133	0.18831	-10.9996	3.83996e-28	6.94187e-27	9.33104	9.2221	2.11286	1.57183
ENSMUSG00000040957.8	Cables1	37.4963	-2.02429	0.427508	-4.7351	2.18952e-06	8.18469e-06	0.648984	0.617225	0.0827096	0.109919
ENSMUSG00000041202.6	Pla2g2d	40.5897	-4.20783	0.499699	-8.42074	3.74127e-17	3.56354e-16	1.13098	1.30573	0	0
ENSMUSG00000041293.5	Gpr110	16.11	-2.52328	0.530628	-4.75526	1.98187e-06	7.44224e-06	0.250817	0.293683	0.00810233	0.00807583
ENSMUSG00000041355.8	Ssr2	1319.04	-2.48792	0.112433	-22.1281	1.69458e-108	2.73562e-106	65.0322	64.509	9.46982	10.3454
ENSMUSG00000041449.9	Serpina3h	104.618	-3.34558	0.335338	-9.97673	1.92709e-23	2.70155e-22	4.92803	4.22397	0.348321	0.238687
ENSMUSG00000041540.9	Sox5	312.23	-3.86419	0.226424	-17.0662	2.65031e-65	1.69393e-63	1.37177	1.38672	0.0694898	0.0757558
ENSMUSG00000041633.8	Kctd12b	89.0955	-4.30586	0.402385	-10.7008	1.00865e-26	1.69469e-25	1.20037	1.18716	0.0127266	0.0380548
ENSMUSG00000041674.10	BC006965	31.455	-2.12407	0.455383	-4.66436	3.09581e-06	1.13397e-05	0.272213	0.369214	0.0432911	0.0377558
ENSMUSG00000041688.10	Amot	1456.22	-2.41268	0.111339	-21.6696	3.97292e-104	5.55463e-102	9.84501	9.85918	1.47508	1.70357
ENSMUSG00000041828.8	Abca8a	696.158	-3.32875	0.152585	-21.8157	1.64507e-105	2.40749e-103	6.92524	6.69967	0.526598	0.604101
ENSMUSG00000041992.8	Rapgef5	42.6333	-4.08721	0.48981	-8.34449	7.15229e-17	6.6586e-16	0.621118	0.8097	0.00783002	0
ENSMUSG00000042155.3	Klhl23	39.0097	-3.64371	0.480989	-7.57546	3.57847e-14	2.78091e-13	0.490558	0.554123	0.0190162	0
ENSMUSG00000042320.8	Prox2	20.7704	-2.09809	0.501406	-4.1844	2.85915e-05	9.32931e-05	0.427889	0.508773	0.0349198	0.0580092
ENSMUSG00000042333.8	Tnfrsf14	97.5914	-2.18099	0.305678	-7.13494	9.68281e-13	6.71791e-12	4.61606	4.91458	0.862682	0.725506
ENSMUSG00000042515.6	Mum1l1	147.199	-2.4429	0.269594	-9.06141	1.28772e-19	1.45486e-18	1.80243	1.7055	0.19917	0.300979
ENSMUSG00000042589.9	Cux2	122.183	-5.17175	0.413773	-12.499	7.56079e-36	1.89735e-34	0.935148	1.1012	0.0116937	0.00388515
ENSMUSG00000042834.8	D0H4S114	1014.36	-3.14474	0.130502	-24.0972	2.67357e-128	6.06745e-126	25.1647	23.8253	2.43485	2.25354
ENSMUSG00000043498.3	9330132A10Rik	37.4585	-2.19486	0.436327	-5.03031	4.89685e-07	1.97019e-06	0.672551	0.508996	0.0586338	0.0918373
ENSMUSG00000044033.8	Ccdc141	50.0882	-3.34737	0.433675	-7.71861	1.17602e-14	9.49203e-14	0.286999	0.342365	0.0122341	0.0152426
ENSMUSG00000044534.6	Ccbp2	10.345	-2.08191	0.543949	-3.82739	0.00012951	0.00038409	0.241198	0.21043	0.0103888	0
ENSMUSG00000044647.8	Csrnp3	144.975	-3.49731	0.299388	-11.6815	1.58425e-31	3.3077e-30	0.7419	0.736644	0.0556837	0.0353191
ENSMUSG00000044749.7	Abca6	355.649	-4.22936	0.229799	-18.4046	1.20642e-75	1.00486e-73	4.41978	4.06304	0.144583	0.195989
ENSMUSG00000045287.6	Rtn4rl1	368.934	-3.09492	0.190408	-16.2541	2.0876e-59	1.13506e-57	6.29702	6.41076	0.611081	0.600255
ENSMUSG00000045867.8	Cradd	127.943	-2.46923	0.278826	-8.85581	8.30767e-19	8.95319e-18	3.09712	3.0293	0.437159	0.410098
ENSMUSG00000045912.7	C2cd4c	120.854	-2.5621	0.289522	-8.8494	8.79879e-19	9.44995e-18	1.02547	1.08075	0.148129	0.119961
ENSMUSG00000046101.9	6030422M02Rik	35.5719	-2.39594	0.446778	-5.36271	8.19817e-08	3.61144e-07	0.371813	0.323485	0.0252862	0.0453662
ENSMUSG00000046169.8	Adamts6	450.045	-2.54856	0.16709	-15.2526	1.58105e-52	7.03341e-51	5.06941	5.30166	0.708659	0.774496
ENSMUSG00000046213.9	Cym	22.4581	-2.67357	0.509657	-5.24582	1.55588e-07	6.61154e-07	0.904045	1.42711	0.050515	0.0503498
ENSMUSG00000046314.8	Stxbp6	812.744	-2.64587	0.138353	-19.124	1.5926e-81	1.44992e-79	9.51719	10.0015	1.196	1.44846
ENSMUSG00000046324.6	Ermp1	6775.62	-2.06495	0.0790483	-26.1226	2.01887e-150	5.9648e-148	38.227	40.7479	8.22748	8.14725
ENSMUSG00000046402.9	Rbp1	2661.05	-2.53781	0.1092	-23.24	1.79515e-119	3.4704e-117	59.3312	57.2923	9.58644	7.6488
ENSMUSG00000046598.8	Bdh1	71.0398	-3.38747	0.393573	-8.60697	7.50143e-18	7.49616e-17	1.08084	1.29621	0.0328614	0.0900731
ENSMUSG00000046743.6	Fat4	13.0381	-2.19516	0.539012	-4.07257	4.64972e-05	0.000147239	0.0457442	0.0523502	0.00363744	0
ENSMUSG00000046805.9	Mpeg1	12.2741	-2.46237	0.543675	-4.52912	5.92292e-06	2.08937e-05	0.250796	0.130514	0	0
ENSMUSG00000047108.3	Dnajb7	25.7439	-2.86588	0.503025	-5.6973	1.21722e-08	5.872e-08	1.40051	1.40309	0	0.104945
ENSMUSG00000047496.5	Rnf152	159.874	-3.23786	0.282307	-11.4693	1.88235e-30	3.77893e-29	1.17557	1.14332	0.113468	0.065669
ENSMUSG00000047669.7	Msl3l2	19.465	-2.00317	0.50559	-3.96204	7.43134e-05	0.000228664	0.578598	0.513215	0.043764	0.0727013
ENSMUSG00000047747.8	Rnf150	156.299	-2.05073	0.251625	-8.14993	3.64131e-16	3.25825e-15	0.901811	0.842221	0.186444	0.151187
ENSMUSG00000047797.8	Gjb1	1327.49	-2.5522	0.115547	-22.088	4.12304e-108	6.52148e-106	46.5649	43.1661	6.21805	6.8904
ENSMUSG00000048003.5	Catsper4	40.9628	-2.62489	0.433145	-6.06008	1.36054e-09	7.25637e-09	1.27929	1.10884	0.0891527	0.118481
ENSMUSG00000048078.9	Odz4	13.981	-2.29437	0.536908	-4.27331	1.92596e-05	6.41401e-05	0.0402092	0.0458942	0.00296893	0
ENSMUSG00000048388.3	Fam171b	1196.75	-2.19541	0.112956	-19.4359	3.83722e-84	3.75544e-82	11.3986	11.6982	2.14137	2.19395
ENSMUSG00000048538.7	Gm9826	34.4036	-2.42362	0.450339	-5.38176	7.37607e-08	3.26645e-07	1.44142	1.76782	0.168228	0.143724
ENSMUSG00000048572.4	E030010A14Rik	127.721	-2.44257	0.278986	-8.75519	2.03756e-18	2.12283e-17	2.91941	3.09561	0.443802	0.404434
ENSMUSG00000048706.3	D4Bwg0951e	3054.11	-2.91614	0.0964855	-30.2236	1.15992e-200	6.72713e-198	60.5576	58.1064	7.15801	6.36328
ENSMUSG00000048960.7	Prex2	3660.82	-2.40751	0.0899297	-26.771	7.02777e-158	2.29266e-155	18.403	19.1877	3.19695	2.9247
ENSMUSG00000049044.9	Rapgef4	217.73	-5.28321	0.340208	-15.5293	2.19655e-54	1.05833e-52	2.12954	2.16857	0.0185768	0.037032
ENSMUSG00000049502.10	Dtx3l	585.476	-2.21258	0.149216	-14.8281	9.64423e-50	3.92257e-48	5.65063	5.73874	0.954438	1.13071
ENSMUSG00000049538.8	Adamts16	124.969	-4.25069	0.356187	-11.9338	7.88419e-33	1.77128e-31	1.07352	1.30963	0.0456675	0.022759
ENSMUSG00000049539.1	Hist1h1a	275.644	-3.03928	0.215914	-14.0763	5.31022e-45	1.85195e-43	22.8016	21.9201	2.38212	1.95778
ENSMUSG00000049556.4	Lingo1	28.84	-3.53528	0.508696	-6.94969	3.66082e-12	2.43005e-11	0.530904	0.449402	0.0079537	0
ENSMUSG00000049608.7	Gpr55	12.7177	-2.1927	0.538651	-4.07072	4.68678e-05	0.000148293	0.343451	0.300183	0.0122425	0.0122024
ENSMUSG00000050014.6	Apol10b	16.9647	-2.57594	0.529605	-4.86389	1.151e-06	4.43491e-06	0.577845	0.536253	0.0314384	0
ENSMUSG00000050071.8	Bex1	1271.88	-2.80845	0.12111	-23.1892	5.85526e-119	1.11814e-116	63.8376	62.9144	8.3705	7.05754
ENSMUSG00000050103.10	Agmo	434.652	-2.33931	0.165893	-14.1014	3.72435e-45	1.30761e-43	3.84285	3.98083	0.65545	0.643407
ENSMUSG00000051177.9	Plcb1	155.116	-3.19509	0.281807	-11.3379	8.52077e-30	1.65542e-28	1.01153	1.19135	0.0970182	0.0787932
ENSMUSG00000051234.5	Rnf7	1080.85	-2.26986	0.120445	-18.8457	3.18684e-79	2.80353e-77	47.216	44.1403	7.71026	8.53109
ENSMUSG00000051335.5	Gfod1	68.8606	-2.53998	0.366473	-6.93088	4.18237e-12	2.76921e-11	0.517403	0.71524	0.0750665	0.0654683
ENSMUSG00000051359.8	Ncald	755.274	-3.74155	0.157836	-23.7053	3.18124e-124	6.642e-122	6.75577	6.8401	0.469146	0.369635
ENSMUSG00000052085.6	Dock8	2365.26	-2.24797	0.0976915	-23.0109	3.62533e-117	6.75822e-115	16.9058	16.8579	2.86601	3.27098
ENSMUSG00000052392.4	Acot4	57.4303	-2.58935	0.389416	-6.6493	2.94494e-11	1.79226e-10	1.20415	1.55259	0.124475	0.161288
ENSMUSG00000052520.7	Cyp2j5	355.963	-3.53205	0.204395	-17.2805	6.59945e-67	4.39748e-65	9.28537	9.66503	0.652323	0.650188
ENSMUSG00000052572.8	Dlg2	29.2535	-2.71955	0.481072	-5.65309	1.57587e-08	7.50689e-08	0.181233	0.154332	0.00567709	0.0141463
ENSMUSG00000052726.9	Kcnt2	135.65	-3.04647	0.289091	-10.5381	5.76606e-26	9.28917e-25	1.27517	1.36816	0.124356	0.109075
ENSMUSG00000052854.9	Nrk	46.9516	-2.99655	0.426463	-7.02653	2.11737e-12	1.43222e-11	0.314788	0.325223	0.0203376	0.0202711
ENSMUSG00000053626.4	Tll1	472.011	-3.51912	0.188786	-18.6407	1.50142e-77	1.2918e-75	5.6625	6.27399	0.348418	0.492504
ENSMUSG00000053765.4	Oas1f	14.5148	-2.543	0.537575	-4.7305	2.23966e-06	8.35018e-06	0.734594	0.562182	0	0.0210244
ENSMUSG00000053964.9	Lgals4	70.5135	-2.59483	0.358234	-7.24338	4.3763e-13	3.12345e-12	1.77122	1.78342	0.223929	0.170679
ENSMUSG00000053985.8	Zfp14	43.302	-2.17291	0.420927	-5.16221	2.44055e-07	1.01559e-06	1.82483	1.52483	0.310939	0.14463
ENSMUSG00000054034.4	Tceal5	148.612	-3.93002	0.315302	-12.4643	1.1688e-35	2.91902e-34	7.65162	7.4573	0.420199	0.22173
ENSMUSG00000054422.7	Fabp1	21.1997	-2.13736	0.498696	-4.28589	1.82006e-05	6.08078e-05	2.23906	2.40732	0.22581	0.225072
ENSMUSG00000054453.5	Sytl5	477.365	-2.65377	0.163811	-16.2001	5.03239e-59	2.71732e-57	12.1272	12.1207	1.64164	1.58218
ENSMUSG00000054588.7	Gbp10	91.7243	-3.94403	0.377042	-10.4605	1.31213e-25	2.06915e-24	1.41912	1.33279	0.0433587	0.0504197
ENSMUSG00000054733.7	Msra	276.532	-2.44421	0.208006	-11.7507	7.00712e-32	1.48678e-30	8.29849	8.82238	1.46336	1.1065
ENSMUSG00000054757.6	Akr1c20	21.332	-2.75596	0.515043	-5.35093	8.75028e-08	3.84134e-07	0.922536	0.671378	0.0359865	0.0179344
ENSMUSG00000054932.3	Afp	40.3436	-2.44815	0.431705	-5.6709	1.42053e-08	6.80038e-08	1.08581	1.24446	0.149656	0.0895
ENSMUSG00000055137.6	5033411D12Rik	93.7863	-2.4954	0.325633	-7.66322	1.81328e-14	1.44279e-13	3.68573	4.72182	0.619127	0.450959
ENSMUSG00000055172.8	C1ra	352.478	-3.85165	0.465386	-8.27625	1.27115e-16	1.1654e-15	7.44685	7.95155	0.270468	0.0933174
ENSMUSG00000055435.6	Maf	1338.28	-3.35337	0.124259	-26.987	2.09841e-160	7.14327e-158	10.5394	9.43391	0.803092	0.853325
ENSMUSG00000055538.6	Zcchc24	765.922	-2.56226	0.141464	-18.1124	2.54301e-73	2.02137e-71	9.75373	10.4978	1.31295	1.59315
ENSMUSG00000055737.6	Ghr	1514.43	-2.68995	0.108656	-24.7565	2.63619e-135	6.35078e-133	9.59408	9.95899	1.2828	1.31641
ENSMUSG00000056144.7	Trim34a	184.66	-3.02151	0.254153	-11.8885	1.35767e-32	2.99855e-31	2.73255	2.54204	0.227442	0.270575
ENSMUSG00000056220.8	Pla2g4a	114.095	-2.0724	0.288455	-7.18448	6.74638e-13	4.74154e-12	0.907702	1.07846	0.200368	0.165615
ENSMUSG00000056423.7	Uts2d	5728.29	-4.24285	0.100207	-42.341	0	0	447.032	431.5	21.8715	17.6635
ENSMUSG00000057346.4	Apol9b	18.5837	-2.90231	0.528554	-5.49104	3.99573e-08	1.82844e-07	0.795734	0.751645	0.0195849	0
ENSMUSG00000057604.8	Lmcd1	754.765	-2.64704	0.140793	-18.8009	7.41955e-79	6.4546e-77	25.6613	25.2206	3.12183	3.75912
ENSMUSG00000057614.5	Gnai1	771.9	-2.57803	0.136523	-18.8835	1.55906e-79	1.37928e-77	14.4899	13.5084	1.9652	2.01724
ENSMUSG00000057766.7	Ankrd29	53.4555	-3.19573	0.417176	-7.66038	1.85381e-14	1.47423e-13	1.04486	1.01005	0.0473722	0.0661041
ENSMUSG00000058624.6	Gda	928.361	-2.71445	0.128051	-21.1981	9.93654e-100	1.26501e-97	9.03784	8.70681	1.12966	1.17161
ENSMUSG00000058773.2	Hist1h1b	469.728	-3.16546	0.178545	-17.7291	2.49848e-70	1.84546e-68	38.8982	38.1636	3.99157	3.05717
ENSMUSG00000058952.7	Cfi	7181.92	-2.96176	0.0854733	-34.6513	4.27379e-263	4.18271e-260	211.284	202.366	24.1773	21.6389
ENSMUSG00000059493.6	Nhs	10.7894	-2.13752	0.543577	-3.93232	8.41306e-05	0.000256503	0.0891766	0.0718163	0	0.00353392
ENSMUSG00000059742.4	Kcnh7	178.033	-3.39286	0.268565	-12.6333	1.38334e-36	3.5628e-35	0.712058	0.745362	0.0512582	0.0510905
ENSMUSG00000060183.6	Cxcl11	41.3295	-2.24051	0.419664	-5.33883	9.3546e-08	4.08488e-07	0.620875	0.657904	0.0905116	0.0738127
ENSMUSG00000060224.3	Pyroxd2	1203.6	-2.24034	0.113337	-19.767	5.73033e-87	5.94247e-85	21.8342	21.1809	3.82347	4.00051
ENSMUSG00000060512.3	0610040J01Rik	227.742	-2.43206	0.222332	-10.9389	7.513e-28	1.34299e-26	7.21893	6.78082	0.918185	1.18142
ENSMUSG00000060675.7	Pla2g16	792.034	-3.73225	0.153436	-24.3244	1.08192e-130	2.49143e-128	7.68693	7.878	0.527138	0.442709
ENSMUSG00000061531.7	Fam23a	27.5144	-3.28941	0.505718	-6.50445	7.79787e-11	4.57329e-10	0.523267	0.475969	0.0171718	0
ENSMUSG00000061740.6	Cyp2d22	611.806	-2.12994	0.146217	-14.5669	4.55955e-48	1.74995e-46	12.0974	12.2267	2.53487	2.1897
ENSMUSG00000061808.3	Ttr	17698.1	-2.43693	0.0870414	-27.9973	1.75066e-172	7.40908e-170	824.789	828.262	142.544	121.325
ENSMUSG00000061825.3	Ces2c	54.5935	-2.09017	0.379534	-5.50721	3.6457e-08	1.67315e-07	1.71695	1.43599	0.237703	0.268515
ENSMUSG00000061947.4	Serpina10	45.2673	-3.39672	0.448368	-7.57574	3.57088e-14	2.77777e-13	1.89571	1.73749	0.0776092	0.0580164
ENSMUSG00000062260.5	AA415398	24.0669	-2.22721	0.487369	-4.56985	4.88073e-06	1.74086e-05	0.733087	0.807881	0.0658961	0.0821007
ENSMUSG00000062309.7	Rpp25	23.1316	-2.26652	0.492918	-4.59818	4.26207e-06	1.53531e-05	0.964784	1.1374	0.0927735	0.09247
ENSMUSG00000062480.5	Acat3	159.455	-2.27842	0.251626	-9.05479	1.36833e-19	1.54371e-18	3.69612	4.01645	0.599072	0.663458
ENSMUSG00000062624.5	Cyp2c67	29.6435	-2.64317	0.4751	-5.56339	2.6459e-08	1.22725e-07	1.06363	1.07607	0.0901221	0.0538963
ENSMUSG00000062646.6	Ganc	786.847	-2.2414	0.130716	-17.147	6.61368e-66	4.27949e-64	4.864	4.78948	0.875183	0.868899
ENSMUSG00000063232.8	Serpina11	31.3563	-2.79255	0.480222	-5.81512	6.05901e-09	3.02738e-08	1.4496	1.19812	0.124873	0.0207441
ENSMUSG00000063445.8	Nmral1	286.2	-2.37297	0.211787	-11.2045	3.87504e-29	7.26698e-28	3.77209	4.61882	0.754181	0.567784
ENSMUSG00000063446.4	E130309F12Rik	56.8606	-2.83082	0.4068	-6.95875	3.43294e-12	2.28362e-11	0.369711	0.595124	0.0386471	0.0385207
ENSMUSG00000063730.6	Hsd3b2	133.592	-2.11956	0.296202	-7.15577	8.32034e-13	5.79832e-12	2.27924	1.69811	0.240587	0.463063
ENSMUSG00000064065.8	Ipcef1	10.0091	-2.21539	0.544334	-4.0699	4.70335e-05	0.000148757	0.0905698	0.0591468	0	0
ENSMUSG00000064215.7	Ifi27l1	36.3665	-2.35944	0.441648	-5.34234	9.17531e-08	4.01508e-07	1.31752	1.65612	0.148962	0.169686
ENSMUSG00000064225.5	Paqr9	72.5789	-3.91433	0.408241	-9.58827	8.95762e-22	1.15257e-20	1.97839	2.12249	0.0541749	0.0674971
ENSMUSG00000066071.5	Cyp4a12a	165.854	-5.12092	0.366945	-13.9555	2.91126e-44	9.82488e-43	4.77431	4.2886	0.038557	0.0768616
ENSMUSG00000066438.6	3830431G21Rik	35.8821	-3.49866	0.488078	-7.16825	7.5965e-13	5.3128e-12	0.49835	0.701279	0	0.0236985
ENSMUSG00000066477.6	Gm16551	1055.18	-2.42636	0.133365	-18.1934	5.82159e-74	4.67489e-72	10.9818	11.2001	1.50824	2.00823
ENSMUSG00000066800.3	Rnasel	117.063	-2.6505	0.304559	-8.70274	3.2398e-18	3.32016e-17	1.38369	1.53885	0.21652	0.124255
ENSMUSG00000066842.11	Hmcn1	46.191	-3.85288	0.475379	-8.10486	5.28051e-16	4.68484e-15	0.112586	0.1759	0	0.0044051
ENSMUSG00000067279.2	Ppp1r3c	69.249	-3.92851	0.417592	-9.40751	5.08021e-21	6.30357e-20	1.72159	1.60347	0.0229631	0.0686638
ENSMUSG00000067610.1	Klri1	12.798	-2.55424	0.542725	-4.70633	2.52214e-06	9.34774e-06	0.864916	1.19145	0	0
ENSMUSG00000067818.6	Myl9	18.4016	-2.88877	0.528982	-5.461	4.73459e-08	2.14274e-07	1.0136	1.08837	0	0.0267781
ENSMUSG00000069805.4	Fbp1	11.3801	-2.20599	0.542903	-4.06332	4.83803e-05	0.000152801	0.390364	0.488854	0.0183421	0
ENSMUSG00000069830.3	Nlrp1a	74.4817	-2.63758	0.354437	-7.4416	9.9473e-14	7.46e-13	0.850784	0.836906	0.0708299	0.111781
ENSMUSG00000069874.5	Irgm2	376.375	-3.30645	0.198872	-16.626	4.51477e-62	2.68809e-60	6.35286	6.99144	0.467151	0.617846
ENSMUSG00000070280.6	Slc22a14	34.6503	-3.33155	0.482341	-6.90703	4.9489e-12	3.26017e-11	0.829118	1.05215	0.0389579	0.0129435
ENSMUSG00000070576.4	Mn1	38.6893	-2.01136	0.424685	-4.73611	2.17859e-06	8.1458e-06	0.282853	0.354871	0.0449831	0.0538032
ENSMUSG00000070704.4	Ugt2b36	473.889	-3.09083	0.185889	-16.6273	4.42016e-62	2.64181e-60	15.2687	12.6562	1.53135	1.14853
ENSMUSG00000071042.4	Rasgrp3	281.824	-3.28752	0.220217	-14.9286	2.14823e-50	8.99441e-49	3.71598	3.33826	0.278904	0.290628
ENSMUSG00000071711.4	Mpst	521.071	-2.397	0.160562	-14.9288	2.13955e-50	8.98212e-49	19.5154	19.6392	3.46183	2.79326
ENSMUSG00000072677.4	Gm10396	19.6764	-2.78882	0.52336	-5.32869	9.89247e-08	4.31133e-07	0.950787	1.18566	0	0.0515595
ENSMUSG00000073102.2	Ccdc164	118.35	-3.59051	0.326335	-11.0025	3.71576e-28	6.73439e-27	3.14634	2.89169	0.150692	0.175232
ENSMUSG00000073418.4	C4b	766.587	-4.14929	0.168329	-24.6499	3.69086e-134	8.75684e-132	8.41039	8.81265	0.460463	0.327826
ENSMUSG00000073424.3	Cyp4f15	62.5658	-3.86884	0.429458	-9.00868	2.08558e-19	2.32442e-18	1.62778	1.95429	0.0684012	0.0272709
ENSMUSG00000074000.2	Gm10606	87.8912	-2.67759	0.330291	-8.10677	5.19832e-16	4.61715e-15	1.45572	1.47442	0.15657	0.164727
ENSMUSG00000074059.3	Fbxw18	14.0243	-2.48724	0.53872	-4.61695	3.8942e-06	1.4083e-05	0.715734	0.503928	0.0205519	0
ENSMUSG00000074218.2	Cox7a1	136.222	-2.06222	0.289954	-7.11221	1.14199e-12	7.89162e-12	22.8159	18.7435	5.06011	2.65
ENSMUSG00000074274.1	D930028M14Rik	241.964	-3.50687	0.24241	-14.4667	1.96649e-47	7.38446e-46	14.6012	15.6911	1.15623	0.872124
ENSMUSG00000074336.4	Apoc4	55.9479	-3.11336	0.407564	-7.63896	2.18979e-14	1.73007e-13	7.48491	7.67476	0.538246	0.402364
ENSMUSG00000074744.1	Gm807	398.817	-2.10868	0.170285	-12.3832	3.22143e-35	7.944e-34	12.4621	13.0189	2.3373	2.63666
ENSMUSG00000074782.3	4833422C13Rik	10.3911	-2.08884	0.543899	-3.8405	0.000122784	0.000365459	0.112324	0.118158	0.00527782	0
ENSMUSG00000074882.3	Cyp2c68	310.058	-4.19277	0.239298	-17.5211	9.88843e-69	7.00647e-67	11.579	11.5635	0.470809	0.469269
ENSMUSG00000075010.3	AW112010	625.481	-5.46353	0.23064	-23.6885	4.73316e-124	9.62553e-122	54.5473	52.2867	1.12934	0.603026
ENSMUSG00000075316.4	Scn9a	90.6949	-2.42471	0.320821	-7.55784	4.09815e-14	3.16747e-13	0.526662	0.45935	0.0669608	0.0667417
ENSMUSG00000075511.1	1700001L05Rik	43.9581	-2.1413	0.420179	-5.09616	3.46613e-07	1.41824e-06	1.25057	0.996969	0.0962679	0.219321
ENSMUSG00000075520.4	Gm13318	54.0435	-2.85584	0.402205	-7.10047	1.24334e-12	8.558e-12	3.57137	3.34883	0.291457	0.258225
ENSMUSG00000078597.2	Cyp4a12b	54.9846	-4.10692	0.466074	-8.81173	1.23231e-18	1.31181e-17	1.86622	1.18117	0	0.0389764
ENSMUSG00000078853.2	Igtp	285.708	-3.05888	0.232978	-13.1295	2.2312e-39	6.38728e-38	8.42374	8.75647	0.540376	1.07722
ENSMUSG00000078921.3	Tgtp2	397.846	-3.65684	0.201343	-18.1622	1.02792e-73	8.21232e-72	8.17188	8.83571	0.595039	0.476592
ENSMUSG00000078922.3	Tgtp1	378.734	-3.89735	0.209903	-18.5674	5.89916e-77	5.04781e-75	7.36861	7.64273	0.38962	0.398054
ENSMUSG00000078952.2	Gm11019	69.2839	-2.70499	0.362769	-7.4565	8.88502e-14	6.68896e-13	1.50778	1.56387	0.148986	0.159921
ENSMUSG00000079014.3	Serpina3i	28.5297	-2.04221	0.46668	-4.37604	1.20855e-05	4.12574e-05	0.665377	0.838016	0.070185	0.12592
ENSMUSG00000079025.2	Gsdmc	25.4576	-3.54496	0.520732	-6.80765	9.92074e-12	6.34855e-11	0.678934	0.748203	0	0
ENSMUSG00000079283.1	2310009B15Rik	180.254	-2.11062	0.240137	-8.78925	1.5056e-18	1.59191e-17	17.1891	17.8355	2.78832	3.7601
ENSMUSG00000079362.2	Gbp6	173.378	-3.99633	0.29934	-13.3505	1.17679e-40	3.47687e-39	2.46416	2.70014	0.0796016	0.137044
ENSMUSG00000079363.2	Gbp4	264.895	-4.47928	0.273456	-16.3803	2.64488e-60	1.47915e-58	3.7201	3.87229	0.158224	0.0754248
ENSMUSG00000079429.3	Heatr7b1	42.9222	-2.48683	0.423191	-5.87638	4.19337e-09	2.13195e-08	0.327178	0.282177	0.0257334	0.0366417
ENSMUSG00000079484.4	Phyhd1	66.2168	-2.72714	0.370202	-7.36664	1.74982e-13	1.28219e-12	1.42685	1.30093	0.137946	0.126918
ENSMUSG00000084897.1	Gm14226	14.8841	-2.3251	0.537159	-4.32851	1.50124e-05	5.06965e-05	0.19556	0.400236	0.0192527	0
ENSMUSG00000085011.1	Gm16880	89.3797	-2.08538	0.314681	-6.62697	3.42653e-11	2.07088e-10	4.18115	4.16362	0.650923	0.830456
ENSMUSG00000085201.1	Gm13507	293.464	-2.79266	0.204517	-13.6549	1.88732e-42	5.93445e-41	22.7725	20.7332	2.49435	2.60272
ENSMUSG00000085455.1	1810059H22Rik	19.457	-2.23456	0.509251	-4.38794	1.1443e-05	3.9192e-05	0.416983	0.413574	0.0323282	0.0322225
ENSMUSG00000085586.1	Gm11613	86.3827	-2.59999	0.336046	-7.73701	1.01782e-14	8.26663e-14	2.35961	2.85364	0.348454	0.252592
ENSMUSG00000085825.1	A930038B10Rik	69.4928	-2.30954	0.360162	-6.41249	1.43163e-10	8.25401e-10	0.605367	0.699411	0.116072	0.0653912
ENSMUSG00000085912.1	Gm16197	338.56	-2.04299	0.198194	-10.308	6.48144e-25	9.96005e-24	6.27293	6.25992	0.992733	1.53686
ENSMUSG00000086281.1	9530082P21Rik	121.417	-3.22716	0.308205	-10.4708	1.1761e-25	1.86215e-24	1.50314	1.60838	0.116053	0.115673
ENSMUSG00000086544.1	Gm13704	29.8211	-2.76381	0.477378	-5.78956	7.05704e-09	3.50147e-08	0.624008	0.611265	0.0307166	0.0408215
ENSMUSG00000086813.1	Gm13657	213.475	-2.0276	0.218387	-9.28442	1.62584e-20	1.95239e-19	5.90294	6.14475	1.27192	1.15542
ENSMUSG00000086897.1	4632428C04Rik	106.644	-2.20054	0.300382	-7.3258	2.37483e-13	1.72644e-12	2.57259	2.39679	0.488187	0.33293
ENSMUSG00000086983.2	Gm16972	26.5561	-2.37939	0.479863	-4.95847	7.105e-07	2.81094e-06	2.85676	2.64226	0.210934	0.262805
ENSMUSG00000087150.1	BC064078	74.2168	-5.05196	0.47181	-10.7076	9.37496e-27	1.57852e-25	1.92921	2.08592	0	0
ENSMUSG00000087275.2	1110002J07Rik	74.412	-2.12656	0.338239	-6.28716	3.23336e-10	1.82061e-09	1.76932	1.99449	0.307157	0.320068
ENSMUSG00000087413.1	Gm11266	44.641	-2.18322	0.41258	-5.29163	1.21232e-07	5.21963e-07	2.04343	2.04243	0.196496	0.367225
ENSMUSG00000087476.1	1810058N05Rik	121.233	-3.12111	0.304542	-10.2485	1.20151e-24	1.81958e-23	16.0938	15.616	1.19306	1.38734
ENSMUSG00000090175.1	Ugt1a9	50.0954	-2.03604	0.38928	-5.23026	1.69268e-07	7.15791e-07	1.40657	1.18536	0.213824	0.213124
ENSMUSG00000090215.1	Trim34b	58.8942	-2.67479	0.391588	-6.83063	8.45423e-12	5.45467e-11	1.47677	2.01803	0.137391	0.197804
ENSMUSG00000091387.1	Gcnt4	34.2269	-2.05477	0.442039	-4.64839	3.34532e-06	1.21938e-05	0.373571	0.405151	0.0674261	0.0427671
ENSMUSG00000091492.1	Gm17025	71.4373	-4.07659	0.420187	-9.70186	2.96055e-22	3.90559e-21	8.69551	7.45958	0.215299	0.160946
ENSMUSG00000091878.1	C430002E04Rik	30.7171	-2.39688	0.467875	-5.12291	3.00852e-07	1.23714e-06	1.8071	1.99147	0.0949847	0.252464
ENSMUSG00000092005.1	C1rb	47.4734	-3.46101	0.446184	-7.75691	8.70216e-15	7.10465e-14	1.42216	1.41361	0.0720644	0.0287314
