# Supplementary material for: The nuclear matrix protein HNRNPU maintains 3D genome architecture globally in mouse hepatocytes
Source: HighWire-hosted journal article supplement (doi:10.1101/gr.224576.117), 2017-12-22
Supplement: Supplemental_Table_S2.xlsx [file Supplemental_Table_S2.xlsx]

## Sheet: shCtrl_LADs
Supplemental Table S2 Coordinates of LADs (mm9) in shCtrl and shU treated AML12 cells.
chr	start	end
chr1	3590730	4598346
chr1	4914652	9452338
chr1	11270846	12460772
chr1	12605782	13090026
chr1	13812440	15888382
chr1	16315226	16482084
chr1	16879796	20019910
chr1	21705838	23001814
chr1	23394278	23859388
chr1	24151634	29954642
chr1	30081566	30713716
chr1	31240096	33687318
chr1	34351170	34877136
chr1	34989676	36023842
chr1	37051686	37910816
chr1	38187938	39455904
chr1	40394568	43043886
chr1	44266768	45752748
chr1	46062372	46193994
chr1	46381956	46914638
chr1	47026310	50746784
chr1	52022290	52198742
chr1	52326138	52555104
chr1	52673010	53691270
chr1	53938078	54771922
chr1	55197388	56534764
chr1	57054496	58278466
chr1	61093262	61362202
chr1	62542440	62678802
chr1	65323176	66171748
chr1	66389612	66701450
chr1	67146016	67569934
chr1	67717198	69317244
chr1	69765616	70753090
chr1	70987478	71524350
chr1	73025124	73603796
chr1	75659708	76854290
chr1	77220362	77343084
chr1	77997414	78196458
chr1	78701729	80071696
chr1	80595874	81409622
chr1	82399752	82737038
chr1	83145852	84723308
chr1	87561172	87689254
chr1	91835946	92015460
chr1	92238248	92734300
chr1	94158386	94468142
chr1	95895775	99533084
chr1	100223458	101740318
chr1	101935696	106937872
chr1	107278632	107476072
chr1	108756708	109518622
chr1	110368838	114101420
chr1	114250654	114845082
chr1	115214078	115790184
chr1	115920948	117487604
chr1	117765394	117899734
chr1	118325770	119471406
chr1	120694176	120949084
chr1	122118497	125379304
chr1	125934756	126059380
chr1	126280568	127230030
chr1	127773550	128566946
chr1	128805936	129629568
chr1	130338580	131073276
chr1	131367414	132537652
chr1	134510406	134819868
chr1	139007480	139370240
chr1	139955264	140168276
chr1	141063952	142930184
chr1	143050454	143772562
chr1	143975740	144422378
chr1	144628820	145342562
chr1	145645176	146772108
chr1	146969042	147256346
chr1	147445652	147550864
chr1	147873796	147995168
chr1	148321552	151664256
chr1	152067442	152835756
chr1	155399366	155763402
chr1	156008826	156829890
chr1	159490026	161128786
chr1	164678688	166352858
chr1	166483544	167884960
chr1	168030536	168140676
chr1	168301722	169113782
chr1	169312091	170100390
chr1	170769392	171606192
chr1	171793696	172109794
chr1	173429844	173939382
chr1	175004642	178611196
chr1	179801990	180163188
chr1	180352796	181449112
chr1	183226102	183850146
chr1	184479248	184890226
chr1	186752906	186953984
chr1	187466104	187663188
chr1	187865042	188031048
chr1	188605504	189010548
chr1	189197838	191489052
chr1	192028928	192656138
chr1	194007854	194199480
chr1	194323320	194475448
chr1	195442266	196379998
chr1	196925250	197158958
chr10	3332524	4314478
chr10	4687170	4969314
chr10	5303894	5857198
chr10	6351502	7208512
chr10	7522640	12105518
chr10	12784966	13120986
chr10	13252132	13488406
chr10	13957182	14083638
chr10	15165928	15347900
chr10	18269064	18445876
chr10	19868230	20985798
chr10	22319946	23417882
chr10	24711738	24895276
chr10	25864704	26113304
chr10	28339014	28932334
chr10	29354060	29519048
chr10	29852748	30265528
chr10	30577676	30972204
chr10	31393118	32446781
chr10	33705482	33892486
chr10	34446565	36774904
chr10	37320006	37817392
chr10	38138718	39657184
chr10	40327506	41047348
chr10	41392336	41515971
chr10	43976584	47135708
chr10	47265216	47674294
chr10	48467892	49236446
chr10	49551312	51498022
chr10	51636818	51801104
chr10	52184164	57564792
chr10	57972566	58542446
chr10	59818112	60166174
chr10	61220260	61629008
chr10	62860634	64179534
chr10	64412382	64576798
chr10	64721482	65315810
chr10	65419318	65551730
chr10	66056148	66264528
chr10	69690336	70182680
chr10	70898496	73967128
chr10	74318272	74459010
chr10	77164574	77324572
chr10	78112082	78953970
chr10	81494596	82062497
chr10	82371626	82889130
chr10	83116542	83758452
chr10	83894426	84073900
chr10	84664596	85200566
chr10	86246878	86893378
chr10	87648494	88830938
chr10	89240210	90505780
chr10	90733904	92469096
chr10	93671830	93816274
chr10	94132082	94415422
chr10	96829910	97456330
chr10	98250498	98392550
chr10	98787128	99264546
chr10	99719048	101924822
chr10	102271774	107312926
chr10	108147352	110710492
chr10	111407140	114658622
chr10	116096460	116272666
chr10	117312332	118253978
chr10	118445890	119587220
chr10	120147770	120877188
chr10	121012508	122490656
chr10	122637628	123539146
chr10	123675772	126300237
chr10	128449493	129164134
chr10	129471702	129817940
chr11	6709786	7165492
chr11	7303212	7448146
chr11	8098870	8206492
chr11	8843196	11684036
chr11	11941200	16375080
chr11	17196811	19642398
chr11	21451866	22089148
chr11	23666528	28665738
chr11	29738894	29975632
chr11	30245734	30621338
chr11	31827612	31996938
chr11	32766040	32951246
chr11	33119710	33494418
chr11	33801798	35588458
chr11	35901168	38548854
chr11	38676020	40151750
chr11	40290426	40554150
chr11	40660442	43277776
chr11	44338828	45597716
chr11	45735456	48541152
chr11	49163810	49378726
chr11	49571446	49768070
chr11	50340068	51366657
chr11	52321400	53038370
chr11	55388318	57256338
chr11	58127158	58682966
chr11	62482682	65022072
chr11	65657782	67615530
chr11	67970842	68605790
chr11	70876118	71778046
chr11	73110428	74194314
chr11	80608934	81750992
chr11	81960486	82551412
chr11	82715494	83075298
chr11	85761404	85970442
chr11	87026374	87139856
chr11	88970092	93684010
chr11	96279844	96549994
chr11	99091936	99219604
chr11	99472266	99915024
chr11	103308518	103947366
chr11	104516989	104904626
chr11	105194552	105793398
chr11	107585894	107896510
chr11	108275946	109147998
chr11	110410546	110719782
chr11	110908826	111274652
chr11	111407444	112479324
chr11	113181866	113427452
chr11	113661354	114453122
chr11	114848500	114951134
chr11	121345524	121809939
chr12	3971968	4113307
chr12	4247832	4530904
chr12	4683128	4800190
chr12	4998144	6897258
chr12	7030046	7849536
chr12	9092108	9695066
chr12	10092250	10907250
chr12	11051336	11991032
chr12	12140914	13628832
chr12	14928194	16491824
chr12	17100976	17237922
chr12	25152018	25274348
chr12	25433648	25598942
chr12	26552802	27976326
chr12	28828618	29304845
chr12	29880184	31825804
chr12	32881516	32998072
chr12	33278992	33546146
chr12	34116388	34770000
chr12	35205240	35584890
chr12	36560218	40633844
chr12	40750386	40874166
chr12	41934726	42293664
chr12	42675716	43837056
chr12	43980698	45881370
chr12	46329344	50354600
chr12	51382314	52601692
chr12	53222194	53373100
chr12	53760120	55200424
chr12	55401064	55687244
chr12	57568878	58314496
chr12	58795754	60011210
chr12	60347516	63785122
chr12	63901956	64196272
chr12	64558382	66015800
chr12	66163924	66567580
chr12	66912572	70213967
chr12	71327404	71517586
chr12	72227718	72866284
chr12	73102530	74113860
chr12	74475174	76498776
chr12	78438988	78545014
chr12	78656436	78810764
chr12	79431758	79713720
chr12	82124046	83171372
chr12	83631960	84246754
chr12	84706925	84873690
chr12	87602836	88110554
chr12	89552614	92811154
chr12	93185956	95922800
chr12	96049470	96453390
chr12	97079566	98286642
chr12	98492668	99854624
chr12	100311850	100459562
chr12	100676674	101350692
chr12	102397022	103434711
chr12	104074966	104954166
chr12	105262462	105980544
chr12	106351614	106819228
chr12	107064948	108471814
chr12	108600888	109293952
chr12	110438128	110596458
chr12	113193156	113478726
chr12	113622906	113731198
chr12	114458498	116304695
chr12	116769382	116885504
chr12	117033112	117427320
chr12	117802330	118898894
chr12	119004362	119883436
chr12	120022860	121257272
chr13	3268004	3412922
chr13	4489618	4617536
chr13	6567480	8773140
chr13	9839898	10841346
chr13	11268724	12433786
chr13	13723784	13974923
chr13	14832894	15682916
chr13	16916874	17561468
chr13	18109484	18709276
chr13	18956386	19314460
chr13	20263676	21833430
chr13	22204070	23328748
chr13	25440516	25652432
chr13	35191350	35419122
chr13	35650680	36151834
chr13	36331686	36693892
chr13	36880994	37519932
chr13	38443584	38742364
chr13	38844212	40876546
chr13	41167622	41358644
chr13	41883328	42071094
chr13	42745336	43244890
chr13	43631748	44728548
chr13	45163640	45682526
chr13	46249594	46759210
chr13	46917432	47023670
chr13	47222388	48562716
chr13	50424714	50611106
chr13	51317014	51739296
chr13	52448256	52708112
chr13	53131245	54077208
chr13	54183430	54574262
chr13	54951622	55055188
chr13	55839304	56489648
chr13	57028614	58205990
chr13	58371206	59510324
chr13	60040590	60484474
chr13	61016540	61730814
chr13	61925614	62047976
chr13	62331568	62561352
chr13	63880558	63989370
chr13	64548882	65409410
chr13	67031318	67267568
chr13	67769472	68013666
chr13	68686328	69560556
chr13	69769018	70374360
chr13	71144390	73537138
chr13	74040176	74510462
chr13	76230454	78835826
chr13	79002930	80969262
chr13	81117942	85324692
chr13	85798352	89690124
chr13	93459758	94722306
chr13	95358552	97086090
chr13	100618776	100770888
chr13	100913700	101321022
chr13	101611576	102176280
chr13	103413054	104448176
chr13	105573158	106034310
chr13	106150684	107734498
chr13	107849484	108383218
chr13	108771778	108916994
chr13	109127380	110029488
chr13	110524172	111187670
chr13	112330900	112484412
chr13	112683948	113005756
chr13	113291836	114963534
chr13	116005232	117705578
chr13	117929468	120156474
chr14	9313696	12287304
chr14	12690164	14741080
chr14	15043590	15346476
chr14	15666458	16968624
chr14	18285024	18507756
chr14	18792466	18966756
chr14	19579946	19960685
chr14	20113272	20232350
chr14	20445406	20872484
chr14	22768262	24849730
chr14	25147898	25809382
chr14	27561136	27787856
chr14	28327370	31306334
chr14	33442663	34033008
chr14	34307168	34748485
chr14	35620534	37264480
chr14	37465418	37613466
chr14	38035594	41730730
chr14	45367120	45906790
chr14	46386830	46541384
chr14	48503272	48617994
chr14	48998554	49642580
chr14	49795574	51405630
chr14	51653955	52169422
chr14	52376912	52512270
chr14	52958462	53344348
chr14	54320804	54622396
chr14	55402348	55535308
chr14	55748074	55997456
chr14	56891986	57158880
chr14	57653444	57899976
chr14	58630756	60036822
chr14	60184470	61199266
chr14	61520070	61949016
chr14	62438568	63288496
chr14	63882742	64558304
chr14	67779258	69802912
chr14	71209400	72095834
chr14	72298760	73531420
chr14	74088636	74330708
chr14	75482084	76081644
chr14	76596956	76787862
chr14	77441548	79178988
chr14	79614484	79716792
chr14	80024240	80292280
chr14	80507144	80879914
chr14	81209692	83192312
chr14	83478810	84762602
chr14	84950262	85115816
chr14	85266688	92171638
chr14	92517864	92969002
chr14	94291114	96929856
chr14	97133478	98311676
chr14	98676164	99476732
chr14	100247274	102023604
chr14	102432096	103471106
chr14	103859148	105480824
chr14	106333160	108364876
chr14	108561800	111577200
chr14	111857080	116602726
chr14	117467688	118892482
chr14	119414724	120564356
chr14	120883068	121199614
chr14	123060678	123187828
chr14	123641440	125178164
chr15	3950176	5045420
chr15	5693952	5888044
chr15	6799882	8055620
chr15	8468018	8952220
chr15	9122210	10617580
chr15	10743792	11514926
chr15	12307940	12864730
chr15	14003202	16086596
chr15	16889578	17499244
chr15	17622606	20502478
chr15	20612580	20720794
chr15	20990918	24967114
chr15	25967900	27292738
chr15	28056224	31038592
chr15	31615406	33425004
chr15	34491164	36048476
chr15	38716100	40719252
chr15	40835472	41140026
chr15	41803096	42095496
chr15	42547148	49746196
chr15	49899362	51535830
chr15	51770798	52664726
chr15	53556538	54234968
chr15	54549022	54810876
chr15	55084494	55924772
chr15	56025364	57455300
chr15	64518708	65074304
chr15	65180366	66338252
chr15	67314102	68002398
chr15	68258638	68755818
chr15	69414116	72825834
chr15	73590634	74441622
chr15	74646760	74763742
chr15	82187412	82635460
chr15	83476112	84497452
chr15	84955580	85059002
chr15	86110370	86732278
chr15	86833638	88417982
chr15	89337238	90044362
chr15	90503234	95556872
chr15	96360922	97401776
chr15	98035622	98333886
chr15	100535190	100783846
chr15	101357397	101554680
chr15	102592932	102953840
chr15	103273788	103465474
chr16	5232224	6774688
chr16	6999712	7488038
chr16	7603556	8551560
chr16	8948670	9146940
chr16	9370680	10464732
chr16	11543956	11786948
chr16	12174572	13054736
chr16	14363778	14592156
chr16	15552518	15803990
chr16	18989532	20082180
chr16	20818686	21332924
chr16	21573914	21778220
chr16	22298530	22725102
chr16	23710776	23891910
chr16	25608502	25961172
chr16	26268216	27287934
chr16	27488178	29582494
chr16	35136588	35768192
chr16	36099408	37728842
chr16	38555948	38827736
chr16	39227750	42792326
chr16	44246338	44675110
chr16	46233256	46501664
chr16	47238428	49583594
chr16	50461752	51939800
chr16	52775634	53443896
chr16	53563028	55178210
chr16	56126522	57136612
chr16	57238348	57395042
chr16	57632878	58257922
chr16	58655956	64711488
chr16	64866468	65854936
chr16	65966178	71258524
chr16	72176090	72432878
chr16	72621146	74445086
chr16	74799894	75682924
chr16	75788386	76117790
chr16	76609188	76923390
chr16	77772716	78181130
chr16	78416290	79941038
chr16	80140742	83325704
chr16	83442680	84605376
chr16	85429434	85625680
chr16	87534222	88362040
chr16	88597584	90176590
chr16	90379586	91371314
chr16	92888218	93581776
chr16	95014838	95844102
chr16	96044058	96162424
chr16	96392854	97337884
chr16	97551678	97658692
chr17	3555682	4787156
chr17	5437556	5805290
chr17	7339990	7940406
chr17	8566746	10161452
chr17	10543866	10818328
chr17	11037848	12290794
chr17	12587576	12847064
chr17	14392058	14861090
chr17	15275472	15417960
chr17	15980590	17112300
chr17	18024942	21241444
chr17	21361826	21521852
chr17	21830490	22321383
chr17	22484188	23104546
chr17	23292506	23622780
chr17	30674568	31501986
chr17	33203922	33360094
chr17	33463260	33673234
chr17	34389460	34591316
chr17	36475040	36918685
chr17	37186536	39481134
chr17	39855796	40139700
chr17	40337136	42866324
chr17	43514334	44489664
chr17	44972654	45361174
chr17	47235016	47361594
chr17	48163612	50535906
chr17	50759396	53616952
chr17	54294380	56046932
chr17	57443404	59239092
chr17	59418422	61087320
chr17	61285260	62010972
chr17	63234580	63623882
chr17	64680456	65891950
chr17	67020428	68488158
chr17	68616906	71032626
chr17	71973116	73004572
chr17	76577340	77875954
chr17	78104652	78545500
chr17	78899546	79041606
chr17	79497604	79962076
chr17	80648580	80869286
chr17	81481054	82103198
chr17	82252852	82353894
chr17	82814028	83613980
chr17	83953274	84176900
chr17	85507874	86825934
chr17	86936050	87076810
chr17	88529226	88782820
chr17	89039531	91000512
chr17	91990142	95254942
chr18	3181162	3288734
chr18	3601028	3733470
chr18	6833672	7517072
chr18	9526018	9860982
chr18	12491966	13382000
chr18	13549380	16364302
chr18	17182996	19734402
chr18	20110894	20234502
chr18	21198500	21313080
chr18	21521252	24021274
chr18	24512630	24617400
chr18	25398120	25687722
chr18	26192478	26297644
chr18	26471400	27819132
chr18	27985724	31683600
chr18	32600874	33358262
chr18	33545376	34395512
chr18	37037190	37952344
chr18	40361044	42379038
chr18	43642112	44528130
chr18	45003154	46063982
chr18	46991726	49968484
chr18	50266494	51190576
chr18	51658482	53279030
chr18	53563213	53821512
chr18	54245576	54910860
chr18	55596988	56447950
chr18	57309198	57488358
chr18	58060520	59319286
chr18	59551214	60554874
chr18	61926467	63732134
chr18	66866954	67370354
chr18	67648234	67765572
chr18	68029538	70065222
chr18	70313966	70530136
chr18	70839706	73712068
chr18	74234724	75147260
chr18	75944202	76365687
chr18	76515792	76632632
chr18	76772354	77859176
chr18	78060487	78163918
chr18	78282548	78866912
chr18	79035128	80207564
chr18	81227128	82549566
chr18	83228966	84496666
chr18	84838648	84943024
chr18	85127948	85459800
chr18	85709818	87132828
chr18	87431402	87755446
chr18	88401794	88960952
chr18	89157790	89852000
chr18	90040144	90254342
chr18	90612636	90762170
chr19	7676057	7929242
chr19	8128958	8304390
chr19	8448019	8708316
chr19	11136352	11366742
chr19	12073154	12473604
chr19	12993710	14539896
chr19	14824162	16091788
chr19	16500132	17237866
chr19	17464412	18636440
chr19	20879464	21122890
chr19	21384576	21583362
chr19	21987388	22992540
chr19	23341612	23590442
chr19	23717816	23946254
chr19	25053530	26833590
chr19	30340968	32166990
chr19	33001702	33725006
chr19	33918982	34255962
chr19	34944160	36692474
chr19	38418782	38785450
chr19	39522320	39657438
chr19	40731198	41248016
chr19	42885068	43477036
chr19	47869878	53368324
chr19	57644626	59708646
chr19	60170288	60531776
chr19	60964896	61337230
chr2	4617192	4785944
chr2	7171248	9050056
chr2	9217910	9603854
chr2	10052586	11264850
chr2	11468306	12672028
chr2	12841140	13104642
chr2	13755922	13923516
chr2	14227308	15005297
chr2	15127146	15419992
chr2	15589878	16226070
chr2	16824690	17861620
chr2	18255400	18820072
chr2	19196712	19450848
chr2	19685282	20224904
chr2	21259476	22752459
chr2	23027662	24162462
chr2	24415740	24663654
chr2	27710304	28307378
chr2	29192670	29315780
chr2	35615574	35799002
chr2	36222868	37170168
chr2	39182248	44723880
chr2	45046132	45513140
chr2	45704674	47379752
chr2	47526566	48152058
chr2	48380354	48591960
chr2	49635966	50137796
chr2	51115742	52218694
chr2	52386406	52599080
chr2	53097776	57000222
chr2	57223628	58280502
chr2	58534964	58807182
chr2	61250560	62485529
chr2	63245842	64906064
chr2	65191242	66325408
chr2	66609458	68622558
chr2	68977980	69477718
chr2	69890334	70502262
chr2	71774832	71893330
chr2	73158212	73569140
chr2	73759940	75034150
chr2	75161478	75322804
chr2	75790022	77296120
chr2	77409008	77958190
chr2	78770052	79340272
chr2	79468598	80347092
chr2	80472558	81853580
chr2	82186628	83194776
chr2	83777840	84159174
chr2	85049044	87741962
chr2	88113950	90138954
chr2	92381008	92490916
chr2	92689386	93240848
chr2	94325752	94674834
chr2	94861976	95116610
chr2	96112606	96455892
chr2	96566874	96906112
chr2	97325838	100256852
chr2	100711326	101458042
chr2	103972947	104173642
chr2	105014642	106786656
chr2	108945456	109174142
chr2	110062974	112016696
chr2	112326366	113108318
chr2	113365060	115259018
chr2	115837260	116851220
chr2	117216768	117329472
chr2	121358486	121468574
chr2	121602982	121785896
chr2	122072974	122519762
chr2	122636242	124469204
chr2	124953248	125578002
chr2	125774134	125995380
chr2	126163646	126479292
chr2	127209904	127820194
chr2	128584386	130221298
chr2	132172224	132581968
chr2	132852198	133243324
chr2	133359894	133475652
chr2	133689032	134551618
chr2	134889464	136678834
chr2	137726820	137930992
chr2	138059202	140502304
chr2	141199038	142614744
chr2	142849954	143707838
chr2	143868360	143987931
chr2	144202070	145461996
chr2	146483264	146868640
chr2	146974594	147156264
chr2	148565768	149329044
chr2	149752588	150632596
chr2	150770256	150886662
chr2	151403362	152002026
chr2	152245263	152449846
chr2	153552067	154160890
chr2	158341462	159203246
chr2	159314200	160394662
chr2	160858652	161246406
chr2	162274164	162593362
chr2	162898146	163124392
chr2	163665654	163774076
chr2	163999424	164175030
chr2	166011254	166566572
chr2	168448270	169877258
chr2	170324068	172984276
chr2	173215288	173414852
chr2	173741372	174775610
chr2	177829784	179609880
chr3	3267768	3756110
chr3	3890296	4806510
chr3	5670194	7248260
chr3	7740140	7985632
chr3	8101772	8831678
chr3	10502398	11714386
chr3	11823998	12644938
chr3	12828986	13905918
chr3	15225902	15340402
chr3	15795276	15983664
chr3	16193696	19033822
chr3	19320728	19763570
chr3	20010286	20663734
chr3	20789662	21016698
chr3	22255634	23036604
chr3	23213850	25197180
chr3	25308422	26297754
chr3	26423658	26955010
chr3	27178153	27289414
chr3	28855655	29639850
chr3	31090794	31452928
chr3	31624596	32168130
chr3	32399806	33866000
chr3	34049480	36221166
chr3	36592422	37381688
chr3	38575892	40087488
chr3	40253736	40449040
chr3	41461812	41836468
chr3	42024508	42360016
chr3	42802246	44039266
chr3	44177922	47350034
chr3	47508258	50178896
chr3	50313334	50863784
chr3	52148514	54189844
chr3	54583658	56682072
chr3	57534269	57761932
chr3	58496680	59779470
chr3	60509694	60992742
chr3	61276134	62029270
chr3	62353498	62966210
chr3	66121162	68235456
chr3	68630954	68748562
chr3	69126796	69452706
chr3	69690358	75168686
chr3	75823622	78768870
chr3	79434736	79625086
chr3	79862168	80751382
chr3	81537200	83641506
chr3	84708904	85382431
chr3	86410718	86819206
chr3	87035276	87322100
chr3	90535482	90682412
chr3	90793710	91354862
chr3	91744864	91963974
chr3	92725376	93282070
chr3	98785490	100494928
chr3	100679346	101113298
chr3	105055778	105482156
chr3	105657230	106283560
chr3	106446930	107003222
chr3	107212634	107389682
chr3	109550910	113029328
chr3	113236178	115539086
chr3	116934110	117511916
chr3	117678424	119344732
chr3	119825074	121003236
chr3	121620620	121758758
chr3	122395476	122597316
chr3	123079258	124466494
chr3	124581356	124730670
chr3	125100042	125593214
chr3	126693818	127484686
chr3	127702500	128131052
chr3	128261960	129590778
chr3	129794724	130937834
chr3	131328488	131682380
chr3	131878824	132201688
chr3	133264360	133720330
chr3	133887178	134287872
chr3	135421348	136266520
chr3	136437608	137156562
chr3	137689680	138081350
chr3	138359284	139180043
chr3	139349340	139673482
chr3	139777378	140130676
chr3	140480496	140637722
chr3	141230398	141483336
chr3	141593602	141883260
chr3	142627374	143431502
chr3	143880514	144019392
chr3	145616272	145762302
chr3	146528306	150999178
chr3	151152220	151686682
chr3	152450386	154370982
chr3	154568593	155386390
chr3	155818026	157478456
chr3	157802232	159408790
chr4	3745754	6170622
chr4	7923690	8156664
chr4	8710186	10808650
chr4	11231798	11406150
chr4	12157470	13035446
chr4	13157038	15995836
chr4	16879456	17578028
chr4	17699966	20618456
chr4	20825098	21576664
chr4	21836390	22250234
chr4	22388194	24931612
chr4	25044634	26284982
chr4	29770770	29882254
chr4	32408244	33224300
chr4	33496344	34409760
chr4	35247056	39841982
chr4	40273562	40570298
chr4	44286458	44749096
chr4	45116126	45301544
chr4	45636150	45923394
chr4	46649678	47008098
chr4	47781526	48150064
chr4	48566346	49078498
chr4	49624028	51473338
chr4	51681686	53356716
chr4	53570634	53672258
chr4	53783048	54800004
chr4	56536004	56650610
chr4	56933108	57275928
chr4	57407974	57686736
chr4	57941760	58766882
chr4	61575427	61759374
chr4	63292644	63623182
chr4	64487204	66433700
chr4	66972402	70066946
chr4	70276728	71695474
chr4	71943274	80465198
chr4	81028180	81327116
chr4	82250848	82842778
chr4	83208924	86136902
chr4	86532439	87344264
chr4	88173268	88357490
chr4	89239638	92369130
chr4	92488910	92613798
chr4	92869608	93176410
chr4	94017394	94125838
chr4	94301764	94632410
chr4	95633256	97390534
chr4	97914556	98022566
chr4	98247972	98576960
chr4	98921972	99498550
chr4	100563570	100757542
chr4	101046306	102766794
chr4	102978608	104728920
chr4	105715750	105824792
chr4	109565210	112995824
chr4	113149968	113875894
chr4	114125666	114553260
chr4	117036776	117185916
chr4	121649452	121786360
chr4	122229794	122450146
chr4	124888062	125547978
chr4	126776306	126982420
chr4	127100640	128351758
chr4	130431318	131352580
chr4	139524712	139728042
chr4	141676706	142634036
chr4	142812868	143094680
chr4	143256814	143519875
chr4	143733892	144375698
chr4	144867482	145147820
chr4	146793838	146986828
chr4	147558146	147719150
chr4	150441242	151226808
chr4	151775594	154337846
chr5	4169570	4531554
chr5	5059828	5191154
chr5	5788338	8674470
chr5	8804778	9919786
chr5	10020480	10608484
chr5	11940376	12517036
chr5	12939788	13278662
chr5	14306584	14896823
chr5	15830126	16356998
chr5	17980138	20337636
chr5	20792422	21981166
chr5	22112140	22801616
chr5	23485686	23653534
chr5	24683554	24899228
chr5	25095442	25414474
chr5	26469862	28246438
chr5	28428082	28575072
chr5	28920813	29714468
chr5	37218494	38331042
chr5	38479014	39967274
chr5	40383428	40966210
chr5	41093804	44019744
chr5	44348756	45230114
chr5	45399652	46191046
chr5	46682552	47876238
chr5	47985382	51477944
chr5	52171726	52454652
chr5	52664074	52921252
chr5	54552038	58102110
chr5	58535786	63093770
chr5	63253016	64135888
chr5	67066464	68640134
chr5	69204954	72674120
chr5	73795888	74426532
chr5	74635458	74887626
chr5	75007636	75265660
chr5	75470923	76538018
chr5	76808740	77665026
chr5	77914664	78103344
chr5	78248416	81223046
chr5	82115778	82314270
chr5	82463336	82608270
chr5	82710606	83233616
chr5	83589262	85310496
chr5	85652442	86161612
chr5	86366544	86470418
chr5	86700440	86954354
chr5	87941510	88930870
chr5	90276192	90493266
chr5	97849316	98143436
chr5	98658100	99454612
chr5	99990412	100743006
chr5	101326218	101553596
chr5	101836996	102284322
chr5	102560410	103168854
chr5	103275816	104085092
chr5	104494390	104765976
chr5	105131215	106062430
chr5	106459610	107039392
chr5	107207848	108048438
chr5	109162708	109274510
chr5	109412928	110004403
chr5	111932596	112277644
chr5	112825106	113498322
chr5	113679080	114178779
chr5	116188430	116819878
chr5	116929468	117455106
chr5	117921316	118416712
chr5	119301478	119508530
chr5	119740060	120503158
chr5	121373000	121517820
chr5	126036656	129920244
chr5	130103073	130261696
chr5	130774122	134420320
chr5	138661060	139068158
chr5	141343466	142785604
chr5	145202864	145440742
chr5	146050718	146232494
chr5	146550026	146932980
chr5	147090042	147483848
chr5	148401205	149221398
chr5	149846990	151329100
chr5	152153344	152534892
chr6	3320678	5264880
chr6	5579814	11762626
chr6	12065630	12202326
chr6	13125390	13246908
chr6	14273660	15562482
chr6	15862744	16932040
chr6	18789689	22320274
chr6	22612096	24122754
chr6	24236248	24504354
chr6	24685288	28360884
chr6	31611222	32761258
chr6	34008716	34147366
chr6	35584560	37226352
chr6	39549488	42155666
chr6	42586258	42859228
chr6	43013332	43144848
chr6	43722886	45811930
chr6	46093544	47074992
chr6	48112370	49065354
chr6	49301022	49451444
chr6	49691724	50088670
chr6	50718360	51353624
chr6	51659666	51951088
chr6	52058502	52435170
chr6	52751068	53108564
chr6	54348432	54477404
chr6	55337717	56587010
chr6	56886652	57628466
chr6	57849950	58475884
chr6	58859898	59763652
chr6	59893662	60683478
chr6	60831746	62507538
chr6	62634720	66754122
chr6	67209664	67557226
chr6	68132786	68919350
chr6	69641624	70267556
chr6	70373346	70647100
chr6	70918342	71107382
chr6	71644688	71748012
chr6	72967628	73143380
chr6	73277294	78691856
chr6	78858420	82722276
chr6	85469946	85605824
chr6	87119718	87656122
chr6	88141304	88383212
chr6	88548378	88732630
chr6	89921910	90178352
chr6	91842202	91985187
chr6	92243738	92444568
chr6	92545640	92705308
chr6	95017988	95565710
chr6	95744018	97073270
chr6	97454330	97675472
chr6	97877828	98436110
chr6	99496772	99921934
chr6	100314292	100679762
chr6	100874358	104053472
chr6	104272840	105665822
chr6	106108094	106584542
chr6	107106864	108301578
chr6	108853352	112085716
chr6	112373240	112860576
chr6	113702986	114261964
chr6	116393022	117690050
chr6	118247318	119229746
chr6	121208802	122088476
chr6	122195452	122694884
chr6	122802206	123292970
chr6	123612526	124507068
chr6	125528180	126397668
chr6	126500588	127834172
chr6	128450262	128752034
chr6	129201900	129378514
chr6	129648340	130020082
chr6	131397880	132050754
chr6	132283992	133125932
chr6	133238418	133390522
chr6	133490632	133888794
chr6	135455022	140285168
chr6	140680654	141978642
chr6	142297246	143368562
chr6	143552426	144373390
chr6	144829106	145557474
chr6	147111144	147633436
chr6	147781126	148836798
chr7	3314846	3507142
chr7	3855103	3977874
chr7	4190508	4393036
chr7	5119822	5342426
chr7	5921208	6579636
chr7	6853400	7248296
chr7	10709990	11351078
chr7	12223094	13454954
chr7	13687748	14273864
chr7	14394790	14541690
chr7	14710132	15240925
chr7	17703580	17807554
chr7	18221446	18997874
chr7	19191574	19364416
chr7	24083566	24428112
chr7	24553660	25072198
chr7	26762906	27604854
chr7	27717756	27885278
chr7	31644040	32148410
chr7	34389334	34822798
chr7	35224035	35367444
chr7	36514208	38667826
chr7	46680444	48377442
chr7	48571258	49965190
chr7	50790892	51647572
chr7	53317350	53561992
chr7	54484836	55033870
chr7	55141902	55964276
chr7	57010850	59039886
chr7	59224786	60884782
chr7	61216178	61415742
chr7	61781366	63033334
chr7	63496032	65508110
chr7	66247718	66511936
chr7	67067136	67734148
chr7	67958652	68714568
chr7	69227850	69725902
chr7	69827782	70966946
chr7	71575208	72386728
chr7	73955704	74257342
chr7	75445970	76974990
chr7	77552754	78592498
chr7	78699778	79584250
chr7	79927374	80172570
chr7	80275656	80505446
chr7	80804896	81264516
chr7	82290462	82486872
chr7	83114936	84105106
chr7	84430966	84910844
chr7	85225862	85969430
chr7	88549684	90960442
chr7	91455396	91693554
chr7	91923690	95365942
chr7	95715304	96245984
chr7	97792142	98717440
chr7	100087106	100400334
chr7	101175586	101431234
chr7	101684994	101878936
chr7	102082074	104127264
chr7	109609624	112632488
chr7	113385118	115097902
chr7	115713670	116651866
chr7	116917462	117031576
chr7	118316094	119078632
chr7	120106954	120239634
chr7	120980672	121106412
chr7	121484324	122660308
chr7	122868674	123194072
chr7	123736668	125159502
chr7	125778346	125885688
chr7	126202890	127979098
chr7	128197470	129114672
chr7	129245916	130049264
chr7	130624618	132685147
chr7	135964640	136766732
chr7	138196278	139429168
chr7	142335514	142688209
chr7	142850788	144409704
chr7	144613444	146369320
chr7	146777138	147161578
chr7	147289492	147991156
chr7	149693176	150098818
chr8	3840808	4146084
chr8	4392362	4838616
chr8	5436018	6031952
chr8	6540990	6721092
chr8	7201702	7578858
chr8	8775928	8990562
chr8	9190462	10111274
chr8	10241530	10432062
chr8	11921596	12495208
chr8	13794946	14905344
chr8	15010488	17570028
chr8	17843912	18073464
chr8	18276596	19543342
chr8	22905210	23509588
chr8	24418396	25438516
chr8	25702832	25952896
chr8	26489068	26637522
chr8	28378531	32181673
chr8	33227048	33495050
chr8	33639194	34432446
chr8	36118148	36339098
chr8	36630640	40002484
chr8	40514018	41357462
chr8	41698004	42103382
chr8	42585926	42977172
chr8	43441312	45717166
chr8	46163478	46345784
chr8	48054196	48635654
chr8	49126716	50170096
chr8	50371554	55475644
chr8	55623446	56192124
chr8	58084802	58578006
chr8	59055630	63272776
chr8	64167466	66042852
chr8	66212450	66421130
chr8	67477968	70169688
chr8	70882082	71162402
chr8	71414354	71757872
chr8	75981876	81488000
chr8	82350738	83245142
chr8	83362218	84190964
chr8	84491474	84645304
chr8	85463646	86021324
chr8	89506278	90555374
chr8	90873850	91528538
chr8	91630452	93254468
chr8	93698990	93823274
chr8	94332574	96411500
chr8	98458204	100793690
chr8	100910684	104248674
chr8	104374840	106808546
chr8	110149994	112117654
chr8	112543766	113126026
chr8	114576348	118198546
chr8	118662918	119438934
chr8	120008654	120169930
chr8	120356242	120723986
chr8	120901156	121864452
chr8	123412288	123621298
chr8	123735850	124010442
chr8	126888106	127057892
chr8	127690852	128968212
chr8	131313982	131708518
chr9	3326554	5132192
chr9	5401744	5845356
chr9	6684562	7542862
chr9	8090328	9001888
chr9	9353310	10123954
chr9	10290248	13131778
chr9	14521950	15016722
chr9	15147488	20219368
chr9	22295558	24873678
chr9	25468262	28752488
chr9	29246132	30149286
chr9	31200614	31491920
chr9	31608156	32387956
chr9	32656328	33282074
chr9	34253418	34661946
chr9	35393778	37172338
chr9	37602478	39984298
chr9	40128370	41800694
chr9	42006490	42725906
chr9	43049320	43508638
chr9	46191566	46803034
chr9	47732856	48429062
chr9	48722152	49320654
chr9	50029038	50177192
chr9	51179582	51730422
chr9	52333796	52970516
chr9	53511960	54367146
chr9	55473006	55790096
chr9	59637776	60573922
chr9	67171098	69082082
chr9	73046914	73555630
chr9	75435828	76261890
chr9	76724710	77289440
chr9	81648408	82742378
chr9	82935216	83420382
chr9	83547062	84217486
chr9	84368730	86367880
chr9	86649980	88230046
chr9	89111035	89733818
chr9	90153462	92049174
chr9	92368382	93737766
chr9	94531756	95309414
chr9	97114298	98023770
chr9	98501316	98888876
chr9	99119972	99237662
chr9	99685476	100260026
chr9	100641868	100971214
chr9	101129424	102515792
chr9	103319124	106065278
chr9	106760272	107166202
chr9	109060915	109166558
chr9	109279760	109732412
chr9	111186515	111846900
chr9	112091428	113517274
chr9	113690768	114034146
chr9	114886334	115110390
chr9	115322140	116037244
chr9	116235788	118823482
chr9	119360186	119768126
chr9	120042522	120485790
chr9	122300726	122981928
chr9	123834244	124061552
chrX	4973136	5080496
chrX	5185694	5909270
chrX	6087418	6761774
chrX	8417314	8695616
chrX	9528820	9702682
chrX	13551948	15955200
chrX	17953338	18241252
chrX	19059480	19181944
chrX	19589560	19892880
chrX	20717698	23183064
chrX	23408074	23665886
chrX	33249014	33432142
chrX	33745107	33961682
chrX	35085944	35502612
chrX	36071972	39108820
chrX	39860620	40618714
chrX	40946190	41465120
chrX	41578028	42865376
chrX	42969750	45297334
chrX	45989154	46468068
chrX	47399240	50246840
chrX	50621628	51079892
chrX	53404674	53906970
chrX	54068678	54792388
chrX	54917834	55154942
chrX	55507930	55829540
chrX	55969666	59869158
chrX	59980252	61618006
chrX	61782134	63003306
chrX	63874810	63987592
chrX	64717806	65360806
chrX	65502142	65740188
chrX	66558896	67463776
chrX	67861858	67966932
chrX	68310878	68527076
chrX	70005728	70113378
chrX	71754240	71874466
chrX	72439266	72617384
chrX	73384610	74461398
chrX	75018762	82328858
chrX	82576622	82920175
chrX	83227022	83921976
chrX	84484998	85362186
chrX	85468036	86695042
chrX	86798836	88195498
chrX	89224054	90103868
chrX	90216138	90682896
chrX	91564856	93165242
chrX	93414084	94465825
chrX	94632208	95791838
chrX	97547524	98271746
chrX	100009280	100234032
chrX	100868915	101061206
chrX	101278888	101442766
chrX	102205668	102910070
chrX	103556822	103754916
chrX	103936922	105761258
chrX	106082400	106209946
chrX	106486018	107784196
chrX	107902742	110170342
chrX	110327778	112114250
chrX	112287328	113317856
chrX	113462244	115656354
chrX	116736504	118845230
chrX	119011198	120107164
chrX	122880204	124028272
chrX	124382982	126000800
chrX	127304452	127438958
chrX	127562636	131887554
chrX	132100704	132678242
chrX	132984084	133419526
chrX	133654082	134202310
chrX	134446670	134735396
chrX	136480602	136928602
chrX	140145616	141861538
chrX	142037970	142412848
chrX	142618348	143562870
chrX	143894962	144167280
chrX	146574334	146891022
chrX	147248390	147365080
chrX	149311504	149730500
chrX	150195562	150417312
chrX	150604084	151358602
chrX	151863848	153362348
chrX	153654733	155610840
chrX	155736848	156613183
chrX	157486064	159137508
chrX	159333250	161354340
chrX	162037514	162510902
chrX	163816048	164238240
chrX	164931738	165357656
chrY	249450	391110
chrY	543272	687990
chrY	1126885	1794530
chrY	2543737	2680472

## Sheet: shU_LADs
chr	start	end
chr1	3119380	3377272
chr1	3549532	4690186
chr1	4874586	6099406
chr1	6317438	9667016
chr1	10322408	13194314
chr1	13718752	15988626
chr1	16336332	16507928
chr1	16788326	20870248
chr1	21285570	24686318
chr1	24888074	30762066
chr1	31100082	31885474
chr1	32049330	34058854
chr1	34351170	34813040
chr1	35029162	36039452
chr1	36720682	36886130
chr1	37015378	37939456
chr1	38205036	39819183
chr1	40147164	43124719
chr1	43640378	43871632
chr1	44299530	45829488
chr1	46013836	51218048
chr1	51631558	54968478
chr1	55200236	58363368
chr1	60567096	63088918
chr1	63263490	63655338
chr1	64994146	66751944
chr1	66959266	71826762
chr1	71957180	72260828
chr1	72501896	73752822
chr1	75459608	77435176
chr1	77631604	79711958
chr1	79892384	80170082
chr1	80511118	82751358
chr1	83103040	84707064
chr1	88598546	88929668
chr1	91828373	92030234
chr1	92247066	92701760
chr1	94128688	94703376
chr1	95895775	99549338
chr1	99678416	99855166
chr1	100127446	107514038
chr1	108166864	114547276
chr1	114732938	119424058
chr1	120612062	121062494
chr1	121549020	121870344
chr1	122020692	125497686
chr1	125731390	127233838
chr1	127689816	130028434
chr1	130136192	132563198
chr1	132728050	132883106
chr1	134373456	134816340
chr1	138306619	140287532
chr1	141073484	144430018
chr1	144659714	145391992
chr1	145631668	148277924
chr1	148476114	153094656
chr1	153332476	153628308
chr1	154196254	154557774
chr1	155329566	156818918
chr1	157070112	157819328
chr1	158108756	158392524
chr1	159293028	161153698
chr1	161304068	162752026
chr1	163038764	169097112
chr1	169295792	170217690
chr1	170583116	172970450
chr1	173424266	173928584
chr1	174266738	178567088
chr1	178852678	179025982
chr1	179790076	181660884
chr1	182411776	182577172
chr1	183210910	183957992
chr1	184157460	184305318
chr1	184469904	184920319
chr1	186752906	186970356
chr1	187256282	191504808
chr1	191838342	192929878
chr1	193959328	195004120
chr1	195263750	196372078
chr1	196930130	197158958
chr10	3290776	4350054
chr10	4543182	5859998
chr10	6367570	7309176
chr10	7518306	12378782
chr10	12703554	13676686
chr10	13791596	15836690
chr10	15988594	16164548
chr10	17458756	18589708
chr10	18969436	19186972
chr10	19373142	21065306
chr10	21825290	22090748
chr10	22319946	24037690
chr10	24426860	25002852
chr10	25275704	26384902
chr10	26625860	26878168
chr10	27473136	27636114
chr10	28297034	31179744
chr10	31371228	34049284
chr10	34371922	35020136
chr10	35163328	36892796
chr10	37213440	39911312
chr10	40232288	41106598
chr10	41340652	41846422
chr10	42044874	42389484
chr10	42599218	43063172
chr10	43458034	44758882
chr10	44935156	46514558
chr10	46706678	47813742
chr10	48598372	49138064
chr10	49408976	50215620
chr10	50465144	55328130
chr10	55463158	57564792
chr10	58009930	58667134
chr10	59534328	59641926
chr10	59853285	60101590
chr10	61170688	61625028
chr10	62350416	64204168
chr10	64405316	66296302
chr10	66875182	67517146
chr10	67821864	68477484
chr10	68698890	70285394
chr10	70795714	74453502
chr10	75845424	76092540
chr10	76219342	76359208
chr10	77157342	77467564
chr10	78000320	78971038
chr10	81481262	82227616
chr10	82373811	85200566
chr10	85335924	85989132
chr10	86153440	88841756
chr10	89248130	90500502
chr10	90723460	92484428
chr10	93120423	93372118
chr10	93611968	94905584
chr10	95130328	95262782
chr10	95461582	96085458
chr10	96412398	97756072
chr10	98147348	101945700
chr10	102222288	107272340
chr10	108071492	110870446
chr10	111187886	114595026
chr10	114898862	115943528
chr10	116096460	117130100
chr10	117283798	119685414
chr10	120399676	126340976
chr10	128443918	129958146
chr11	6596132	7649942
chr11	7769541	8248416
chr11	8829460	11720192
chr11	11878476	16406900
chr11	16869394	17016990
chr11	17217764	19710406
chr11	21329220	22078984
chr11	22254440	22410928
chr11	23534950	27710738
chr11	27834326	28664336
chr11	28848226	28992228
chr11	29250542	29494538
chr11	29719268	29949528
chr11	30245734	30621338
chr11	30737058	32028452
chr11	32721950	35532410
chr11	35851826	38452856
chr11	38555360	40111262
chr11	40320722	40454794
chr11	40660442	43937974
chr11	44094536	45640060
chr11	45745250	48517854
chr11	48884264	49378726
chr11	49602090	49871056
chr11	50286130	51338542
chr11	52321400	53048956
chr11	55374120	57234448
chr11	58085350	58699190
chr11	61030334	61231040
chr11	62454220	68627723
chr11	70889832	71778046
chr11	73086172	74187866
chr11	80342668	81793126
chr11	81949230	83092352
chr11	84029778	84155172
chr11	85166054	86017952
chr11	86960396	87185452
chr11	87583672	87763408
chr11	88981666	93654316
chr11	96225934	96589308
chr11	99067598	99229010
chr11	99516578	99865488
chr11	103319444	104109024
chr11	104454424	104947462
chr11	105191044	105771132
chr11	107111382	107236146
chr11	107473132	107920996
chr11	108256412	109139294
chr11	109559764	112706992
chr11	113153716	113489806
chr11	113666357	114532835
chr11	114814501	115014071
chr11	118493018	118782096
chr11	121248178	121809939
chr12	3549378	3747398
chr12	3932860	4819608
chr12	4975318	7939838
chr12	8086474	8195074
chr12	9092108	12805076
chr12	12951386	16728190
chr12	17091994	17401382
chr12	25152018	25270234
chr12	25452750	25701926
chr12	25984002	28102524
chr12	28440536	28703418
chr12	28884570	29345720
chr12	29467028	33831624
chr12	34009070	35663672
chr12	35983990	36117786
chr12	36598466	40869498
chr12	41360630	42293664
chr12	42675716	50354600
chr12	50593886	51037530
chr12	51157022	52625290
chr12	53090042	53500022
chr12	53749656	55269136
chr12	55417596	55668488
chr12	56663012	57286472
chr12	57408482	60028046
chr12	60397619	60853844
chr12	61064416	63408304
chr12	63586088	64247205
chr12	64439394	65986224
chr12	66182258	69591780
chr12	69714906	70195106
chr12	71202346	71511766
chr12	72213316	72856352
chr12	73056230	74095740
chr12	74525742	76524252
chr12	76754490	77367618
chr12	77733870	79796272
chr12	82137088	83171372
chr12	83375670	84246754
chr12	84706925	84860004
chr12	85842032	86119158
chr12	87051534	87162366
chr12	87469690	88055772
chr12	88356032	88550420
chr12	89493318	92810000
chr12	93185956	93648722
chr12	93748795	96423622
chr12	96562812	96687512
chr12	96928660	99889910
chr12	100033430	100478018
chr12	100729010	101350692
chr12	101765708	102017496
chr12	102386946	103442948
chr12	104064038	104549002
chr12	104675066	104954166
chr12	105224760	106125306
chr12	106351614	106951316
chr12	107164032	109312470
chr12	109822452	109945834
chr12	110173934	110573152
chr12	110813212	111035284
chr12	113190734	113664568
chr12	114489636	116304695
chr12	116769382	116885504
chr12	117033112	117451744
chr12	117621156	121257272
chr13	3268004	3412922
chr13	3906498	4647084
chr13	4836382	4958386
chr13	5118046	5415262
chr13	6442588	8867970
chr13	9478090	9700314
chr13	9803344	11018168
chr13	11175582	12487998
chr13	13672224	13988862
chr13	14318926	16526802
chr13	16866856	17717308
chr13	18004814	18744250
chr13	18898780	19314460
chr13	19451908	21220302
chr13	21343440	21850858
chr13	22184046	23422762
chr13	23979930	24257828
chr13	25229588	26211790
chr13	26339488	26580998
chr13	26695876	26953898
chr13	27278332	27646790
chr13	29139228	29321100
chr13	29429404	29549700
chr13	30186362	30710666
chr13	30877368	31268102
chr13	31758660	32853002
chr13	35043176	37583000
chr13	38324184	40876546
chr13	41094140	41349374
chr13	41599076	42131902
chr13	42518006	44899986
chr13	45104112	48571308
chr13	48735812	48870608
chr13	50424714	50611106
chr13	51321462	51787952
chr13	52306244	52673336
chr13	52915870	54611986
chr13	54901172	55086262
chr13	55905540	56120922
chr13	56296642	56721104
chr13	56909140	58209474
chr13	58352472	60612806
chr13	60892108	61730814
chr13	62331568	62561352
chr13	62781802	63127142
chr13	63496354	64249222
chr13	64564540	65409410
chr13	67026220	68007308
chr13	68686328	69529316
chr13	69836126	70682932
chr13	71080414	73816248
chr13	74000938	74631824
chr13	74766812	74910114
chr13	75107234	75879312
chr13	75990540	78759326
chr13	78877166	80986248
chr13	81099674	85406904
chr13	85594252	90394632
chr13	90686858	92136214
chr13	92791912	95093224
chr13	95342030	97214146
chr13	97520582	97902300
chr13	99146816	99302538
chr13	100266992	101397540
chr13	101569064	102382500
chr13	102619484	104462116
chr13	104935948	108501684
chr13	108720632	111216342
chr13	111803124	112029158
chr13	112330900	112494764
chr13	112665550	115600350
chr13	115748464	117705578
chr13	117885826	120190580
chr14	9243924	12303324
chr14	12614982	15442902
chr14	15543594	17141690
chr14	17509456	18966756
chr14	19307262	19960685
chr14	20113272	20232350
chr14	20445406	20880113
chr14	22738280	24899360
chr14	25157028	26017948
chr14	27599148	27823908
chr14	28324240	31277560
chr14	33124142	34009514
chr14	34277190	34912740
chr14	35620534	37440564
chr14	37763206	42017672
chr14	45361240	45876800
chr14	46192026	47269532
chr14	48446888	49666588
chr14	49831972	52169422
chr14	52376912	52525246
chr14	52951172	53385268
chr14	54156355	54646714
chr14	55351709	55657820
chr14	55760766	56109202
chr14	56615836	57211898
chr14	57636286	58188086
chr14	58567106	63267368
chr14	63453568	63716528
chr14	63900364	64541908
chr14	64717414	66434492
chr14	67037574	67554282
chr14	67773898	69886442
chr14	71189626	73647380
chr14	73918672	76091270
chr14	76611586	76785618
chr14	77423946	79783256
chr14	80012316	83410788
chr14	83562360	84127096
chr14	84576810	87741036
chr14	87842482	91629688
chr14	92675164	93278636
chr14	93767298	93951134
chr14	94357742	94612130
chr14	94754894	97133478
chr14	97237296	99424676
chr14	100161636	102094678
chr14	102418164	105473952
chr14	105773556	105981112
chr14	106287346	108276414
chr14	108477688	110110720
chr14	110297260	111515506
chr14	112204764	112981708
chr14	113150268	113951940
chr14	114081738	118819576
chr14	119222578	120594464
chr14	120858064	121336348
chr14	122334844	122453852
chr14	122615676	125178164
chr15	3114828	5045420
chr15	5250934	8172314
chr15	8468018	11978994
chr15	12252478	12973740
chr15	13563970	14290780
chr15	14468414	15236802
chr15	15419598	16153150
chr15	16653556	17403894
chr15	17596438	20151744
chr15	20288452	20423728
chr15	20602908	20724026
chr15	21082660	23440602
chr15	23686196	25182406
chr15	25967900	27337952
chr15	28049440	31055880
chr15	31606514	33930768
chr15	34474467	36435588
chr15	37197582	37814006
chr15	38716100	41520274
chr15	41650658	43007394
chr15	43250386	51547584
chr15	51772614	52841886
chr15	53224092	57570034
chr15	57845618	58116660
chr15	58390454	58622820
chr15	59711610	60132720
chr15	60344216	60547326
chr15	60668960	60839984
chr15	64464868	66405142
chr15	67093166	72822220
chr15	73592214	74726668
chr15	74908475	75487494
chr15	77344740	77503616
chr15	77871846	78210722
chr15	80241502	80445800
chr15	82139660	82698381
chr15	83493764	84480036
chr15	84784512	85089790
chr15	86177602	87394268
chr15	87566340	88462554
chr15	89238296	93031370
chr15	93191810	95556872
chr15	95924948	96072970
chr15	96319986	97444796
chr15	97768476	98304864
chr15	100472778	100872288
chr15	101357397	101735180
chr15	102557306	102923714
chr15	103239230	103465474
chr16	3591274	3739054
chr16	5315934	6845966
chr16	6997628	8620242
chr16	8948670	10490726
chr16	11296786	13007852
chr16	13931252	14241518
chr16	14486490	16885300
chr16	19002292	20106596
chr16	20799488	21938686
chr16	22262192	23123476
chr16	23577290	23890142
chr16	25203140	25312876
chr16	25671948	29612556
chr16	34010482	34860328
chr16	34982192	38006610
chr16	38361744	38818334
chr16	39134666	43112766
chr16	43829782	45659718
chr16	46060004	49849614
chr16	50038526	51939800
chr16	52529640	53555062
chr16	53659146	55436080
chr16	56118392	60613932
chr16	60749186	64064322
chr16	64233942	69010420
chr16	69189740	69475982
chr16	69791236	71390278
chr16	71532618	71641106
chr16	71844536	72012458
chr16	72194520	76134802
chr16	76469728	78181130
chr16	78420628	82234194
chr16	82380250	83310262
chr16	83512126	84966964
chr16	85248332	86362536
chr16	86499564	86665224
chr16	86806026	87341038
chr16	87543552	88438828
chr16	88589498	91401196
chr16	91938192	92280240
chr16	92491406	93657148
chr16	93862928	94088904
chr16	94929990	95852064
chr16	96023380	96211882
chr16	96337818	97749118
chr16	98090686	98280274
chr17	3307570	4851510
chr17	5364392	5805290
chr17	7339990	7940406
chr17	8317321	10147710
chr17	10547148	12389330
chr17	12544508	12837156
chr17	14297769	15536540
chr17	15978666	17112300
chr17	17468210	17650052
chr17	18007938	18951134
chr17	19120306	21241444
chr17	21361826	21542982
chr17	21725876	22321383
chr17	22468060	23104546
chr17	23292506	23573468
chr17	30567838	31615964
chr17	32603616	33693424
chr17	34375624	34653252
chr17	36378312	36939542
chr17	37193524	39481134
chr17	40337136	42879720
chr17	43328072	44535534
chr17	44941026	45580040
chr17	47246542	47480716
chr17	48148350	53620404
chr17	53834918	54063948
chr17	54280540	56038018
chr17	57466798	61586966
chr17	61694496	61904642
chr17	62445592	62653714
chr17	63161386	64089684
chr17	64228268	65885422
chr17	66836822	71021308
chr17	71754972	71892712
chr17	72016394	73116510
chr17	73298548	73636954
chr17	73789320	74490760
chr17	75181544	75500508
chr17	76043544	76195974
chr17	76406230	78616694
chr17	78811884	79286774
chr17	79488336	80361750
chr17	80468034	81070208
chr17	81205710	83651980
chr17	83852003	84291110
chr17	84656916	85342362
chr17	85484180	87332776
chr17	88057051	88323822
chr17	88507750	88912979
chr17	89029982	95254942
chr18	3181162	4677306
chr18	5153840	5383258
chr18	5764172	5915832
chr18	6539020	7775904
chr18	8005930	9277812
chr18	9489308	9972172
chr18	10248612	10508702
chr18	11275402	12222156
chr18	12438928	16639440
chr18	17091466	19785584
chr18	19978948	20517086
chr18	21141596	24131764
chr18	24466718	24741062
chr18	25199316	25939312
chr18	26119886	31818732
chr18	32608388	34424682
chr18	37037190	37960786
chr18	40061658	42379038
chr18	43195974	44579596
chr18	44788988	46202214
chr18	46320544	53325750
chr18	53530078	53829176
chr18	54177870	54938886
chr18	55287167	56764974
chr18	57126990	60554874
chr18	61485820	61631960
chr18	61897390	63746328
chr18	65617024	66137158
chr18	66747836	67794390
chr18	67984316	70640336
chr18	70859164	73636392
chr18	74267402	75308820
chr18	75877770	76632632
chr18	76772354	77859176
chr18	77994376	79395514
chr18	79512640	80578644
chr18	80978112	82601648
chr18	82763348	82989234
chr18	83236184	84970416
chr18	85157910	87943724
chr18	88121044	88998748
chr18	89101810	90762170
chr19	7627226	7929242
chr19	8128958	8304390
chr19	8500276	8722334
chr19	11074409	11933700
chr19	12118658	12474820
chr19	12629380	14635630
chr19	14831558	16168102
chr19	16464310	19718532
chr19	19889752	20436792
chr19	20538374	23062318
chr19	23333172	23903846
chr19	24008626	24114384
chr19	24754868	27289084
chr19	27572464	28241682
chr19	28829948	29037526
chr19	30330370	32172366
chr19	32526188	32743440
chr19	32971864	33725006
chr19	33918982	36834284
chr19	37748218	37899534
chr19	38219210	39751094
chr19	40000830	40452985
chr19	40636380	41272984
chr19	42345420	42544930
chr19	42897630	43499880
chr19	45255100	45527334
chr19	47789042	53342316
chr19	54186270	54791734
chr19	54922586	55044262
chr19	55938842	56908600
chr19	57499280	60551382
chr19	60707762	61337230
chr2	3008004	3546648
chr2	3769696	4300508
chr2	4579072	4881193
chr2	6423188	9947962
chr2	10057670	11289724
chr2	11459406	13239194
chr2	13547910	13932468
chr2	14132464	15033728
chr2	15138305	17880908
chr2	18315370	20778312
chr2	20961520	22752459
chr2	22994650	24176410
chr2	24438398	24638686
chr2	25565876	25670764
chr2	26585362	26687390
chr2	27721122	28296990
chr2	28591996	28721024
chr2	28907022	29383066
chr2	33420906	34489940
chr2	34784044	34938320
chr2	35612602	35891804
chr2	36163372	37160452
chr2	38916270	44715880
chr2	44926316	46278494
chr2	46404284	48668416
chr2	48968512	49219000
chr2	49559534	50718998
chr2	50990390	52624670
chr2	53063246	56985438
chr2	57192692	58325590
chr2	58480248	58907810
chr2	61234910	61475108
chr2	61719018	63045310
chr2	63230674	68608262
chr2	68857592	69688820
chr2	69861210	70508146
chr2	71165636	71403190
chr2	71673242	72093568
chr2	72239884	72708464
chr2	72882022	75384602
chr2	75757416	80313718
chr2	80472558	81956030
chr2	82186628	83418078
chr2	83714399	84194662
chr2	84960928	87840646
chr2	88021776	90138954
chr2	92365194	93245575
chr2	93378744	93620518
chr2	94303948	100204150
chr2	100623470	101772616
chr2	101902480	102056696
chr2	103721072	104233950
chr2	104698080	107851554
chr2	107973924	109467406
chr2	109839936	112031306
chr2	112321500	117490816
chr2	117738376	118264206
chr2	121346050	121831422
chr2	121980820	126518158
chr2	127172130	127960678
chr2	128488592	130215060
chr2	131350720	131980580
chr2	132146178	136343152
chr2	136523698	136798538
chr2	137590086	140515926
chr2	140741086	143702358
chr2	143904044	146031418
chr2	146429588	147705384
chr2	148464170	151038792
chr2	151392120	152002026
chr2	152228030	152458500
chr2	153418711	154174422
chr2	156684498	157062554
chr2	158276702	161260210
chr2	161468956	163189746
chr2	163549534	163741708
chr2	163966368	164209052
chr2	164403782	164565372
chr2	164909506	165127624
chr2	165265762	165603748
chr2	165923646	166602950
chr2	168127940	168275385
chr2	168485702	169886992
chr2	170070424	170204492
chr2	170336825	172992097
chr2	173191622	173402546
chr2	173674770	174775610
chr2	177829784	179617152
chr2	180145098	180338660
chr2	181419794	181722056
chr3	3267768	4525696
chr3	4757372	4950214
chr3	5323272	8901124
chr3	9131280	9402690
chr3	9680238	10321794
chr3	10502398	12636580
chr3	12835512	13677886
chr3	13856954	15340402
chr3	15795276	15998270
chr3	16227550	17272694
chr3	17564626	19002479
chr3	19254772	19765994
chr3	19949208	21567326
chr3	22139180	27313064
chr3	28729714	30683664
chr3	31056020	31502056
chr3	31624596	32201950
chr3	32414364	33839040
chr3	34034222	36292130
chr3	36469362	37383916
chr3	37975066	38265362
chr3	38423654	40397302
chr3	40690061	44890066
chr3	45076746	46343074
chr3	46451566	47313418
chr3	47467404	47799332
chr3	47936960	48295156
chr3	48422970	50934068
chr3	51484890	51702844
chr3	52033456	56715526
chr3	57482534	57989640
chr3	58376140	59939564
chr3	60509694	61049960
chr3	61268692	62000178
chr3	62353498	63698480
chr3	63856140	64178784
chr3	64538290	64837846
chr3	65207520	68270426
chr3	68441692	68813236
chr3	69057306	71678628
chr3	71827834	75128094
chr3	75402296	75633014
chr3	75807226	77173152
chr3	77322868	77571612
chr3	77673396	78782322
chr3	79445129	80772152
chr3	81306236	83623462
chr3	84413954	85689718
chr3	85976998	86832820
chr3	87054940	87325490
chr3	90543490	90682412
chr3	90793710	91178912
chr3	91744864	92001520
chr3	92110253	92217322
chr3	92515692	93294654
chr3	96681102	97456014
chr3	98379538	101177972
chr3	101489812	101964688
chr3	102065834	102188358
chr3	102413162	102757486
chr3	103285376	103417254
chr3	104949355	107415232
chr3	108377206	108506424
chr3	109124354	113029328
chr3	113245968	115671114
chr3	116779786	119313906
chr3	119581150	121058556
chr3	121578032	121835535
chr3	122376090	126228076
chr3	126621382	127502844
chr3	127685768	135057026
chr3	135428332	136240274
chr3	136432924	138106874
chr3	138242636	141986096
chr3	142109678	144034356
chr3	144881164	145228756
chr3	145605268	146046442
chr3	146555910	151703572
chr3	152160832	159538982
chr4	3347033	6201278
chr4	6537732	6703670
chr4	7213696	8382252
chr4	8663992	10854962
chr4	11193950	15454764
chr4	15642688	16480060
chr4	16668520	17119918
chr4	17316282	19464176
chr4	19649126	20604330
chr4	20818786	27913646
chr4	28672130	29556824
chr4	29970608	30568800
chr4	30887984	31381250
chr4	31664240	32042350
chr4	32284186	34425672
chr4	34897022	37366412
chr4	37489754	40041700
chr4	40241008	40570298
chr4	43160088	43302536
chr4	43711436	43887649
chr4	44266954	44751703
chr4	44970152	45333829
chr4	45623012	46101554
chr4	46268972	46396312
chr4	46654278	47073432
chr4	47514516	49340458
chr4	49591984	51445826
chr4	51668058	54917590
chr4	55132092	55269516
chr4	56001386	56619116
chr4	56916966	57719300
chr4	57931022	58797080
chr4	58992728	59111702
chr4	59898770	60011380
chr4	61476813	61856303
chr4	62190510	62533614
chr4	63168622	63661254
chr4	63930122	66429814
chr4	66639864	72656920
chr4	72877238	73936698
chr4	74037470	79318202
chr4	79503400	81995702
chr4	82232018	82845056
chr4	83181164	86240628
chr4	86517918	87377058
chr4	87714254	88374166
chr4	89243356	91677888
chr4	91790270	92496656
chr4	92687634	95023260
chr4	95186994	97397938
chr4	97765216	99712668
chr4	99913838	100839368
chr4	101011586	104850304
chr4	105028030	105935450
chr4	109553988	113001612
chr4	113149968	113875894
chr4	113978200	115322036
chr4	116954848	117436116
chr4	118086754	118709928
chr4	119023760	119129600
chr4	119396732	119701120
chr4	120961368	121394993
chr4	122229794	122457564
chr4	123396764	123539670
chr4	123713388	124182112
chr4	124895468	125689034
chr4	126042886	126343888
chr4	126799816	128368228
chr4	130477660	131337052
chr4	136308628	136497244
chr4	138136610	138518576
chr4	139726894	139992326
chr4	141705207	142660112
chr4	142810614	143094680
chr4	143256814	143445384
chr4	143733892	144404470
chr4	144884268	145192900
chr4	146793838	146986828
chr4	147523051	147830820
chr4	150437970	151267084
chr4	151863270	153502960
chr4	153651368	154255590
chr5	4034098	5562468
chr5	5832612	10655216
chr5	11940376	12705878
chr5	12872084	13064538
chr5	13450708	13793164
chr5	14318586	14896823
chr5	15224260	15407426
chr5	15948696	16586562
chr5	17197956	20357620
chr5	20707952	22801616
chr5	23325684	23818660
chr5	24611272	24872994
chr5	25095442	25414474
chr5	26469862	28600572
chr5	28785938	29916482
chr5	30192832	30998892
chr5	33335504	33578884
chr5	35070906	35372414
chr5	35486146	35847182
chr5	37231144	40482494
chr5	40606928	44070616
chr5	44268518	47541804
chr5	47985382	52461808
chr5	52636290	53194027
chr5	54095130	54336006
chr5	54500312	56414298
chr5	56606966	59689980
chr5	59897768	62936860
chr5	63253016	64257998
chr5	67073088	70561312
chr5	70668270	73199890
chr5	73729975	76470926
chr5	76786462	77624548
chr5	77899244	78103344
chr5	78208627	81201354
chr5	81399988	81565264
chr5	82127388	82853752
chr5	82999418	87247218
chr5	87437856	89027282
chr5	89368536	89588312
chr5	89845662	90564798
chr5	92915488	93180490
chr5	96258426	97244502
chr5	97347510	100386920
chr5	100491752	100827848
chr5	101098450	102342058
chr5	102587706	104104116
chr5	104323310	105030101
chr5	105131215	106103910
chr5	106384884	108145926
chr5	108655670	108824516
chr5	109159574	109274510
chr5	109390488	110281464
chr5	110932836	111055073
chr5	111285476	111675576
chr5	111809440	112614533
chr5	112816223	113493702
chr5	113708970	114169560
chr5	114559712	114715404
chr5	116161634	117500923
chr5	117855162	118416712
chr5	119301478	120848228
chr5	121209254	121522682
chr5	126059948	130261696
chr5	130806778	134539934
chr5	135230302	135360258
chr5	138659570	139099592
chr5	141336500	142819614
chr5	144573442	144782008
chr5	145198492	145428812
chr5	146079588	146232494
chr5	146550026	146932980
chr5	147105222	147488162
chr5	147976204	148198366
chr5	148405910	149175362
chr5	149452164	151413284
chr5	151526204	151815018
chr5	152103762	152534892
chr6	3272686	10336842
chr6	10552426	11762626
chr6	11982362	13486988
chr6	14092780	15547766
chr6	15803398	16932040
chr6	17714706	24537944
chr6	24645382	28351154
chr6	30482894	30901786
chr6	31558700	32894312
chr6	33015486	33150041
chr6	33839432	34375052
chr6	35357832	37248496
chr6	37451772	38247448
chr6	39519864	42207968
chr6	42467716	43181654
chr6	43380610	47074992
chr6	48026554	49067428
chr6	49289708	50242898
chr6	50502052	51351014
chr6	51591866	53352730
chr6	53711722	53945212
chr6	54305990	54679284
chr6	55389480	56601174
chr6	56893986	59763652
chr6	59893662	66756654
chr6	67200740	67557226
chr6	67711376	68919350
chr6	69641624	70267556
chr6	70373346	70700670
chr6	70916504	71086712
chr6	71202576	71393060
chr6	72941520	73125032
chr6	73311598	75670144
chr6	75791234	78740372
chr6	78897812	82644404
chr6	84676730	84862834
chr6	85424261	85605824
chr6	87055916	87670678
chr6	88193566	88747690
chr6	89061954	89189226
chr6	89514468	90250818
chr6	91795774	93674240
chr6	94325414	94490140
chr6	94729178	97072038
chr6	97353498	98866506
chr6	99422688	100073366
chr6	100306212	106650146
chr6	106862482	108388632
chr6	108840338	112906148
chr6	113710163	114355330
chr6	114979278	115432118
chr6	116279800	117726470
chr6	117998609	119249779
chr6	119445530	119683746
chr6	121220006	122088476
chr6	122195452	123292970
chr6	123612526	124536614
chr6	125495826	127045222
chr6	127175016	127870636
chr6	128415594	130020082
chr6	130180344	130427650
chr6	131083098	131232312
chr6	131413244	132050754
chr6	132283992	133125932
chr6	133238418	133390522
chr6	133490632	133888794
chr6	135391982	140421012
chr6	140609234	145713368
chr6	146024776	146427552
chr6	147064074	149083194
chr6	149298784	149516428
chr7	3129138	3541472
chr7	3855103	3980712
chr7	4190508	4377264
chr7	5214898	5342426
chr7	5837324	6024344
chr7	6184496	6626758
chr7	6823092	7252153
chr7	10709990	11351078
chr7	12223094	13438330
chr7	13679940	14162981
chr7	14394790	14541690
chr7	14656922	15240925
chr7	17705892	17807554
chr7	18221446	18997874
chr7	19104472	19380513
chr7	24083566	24428112
chr7	24553660	25111676
chr7	25436654	25667468
chr7	26723024	27604854
chr7	27717756	27879706
chr7	31499478	32148410
chr7	34389334	34837652
chr7	35221570	35387674
chr7	36212789	39037288
chr7	46680444	48377442
chr7	48571258	49838860
chr7	50515044	51681024
chr7	53227334	53985720
chr7	54466810	55033870
chr7	55141902	56046668
chr7	56881852	63003028
chr7	63457704	65896918
chr7	66263054	66511936
chr7	67067136	67664910
chr7	67958652	70960652
chr7	71190764	72375898
chr7	72714328	73119814
chr7	73838752	74336290
chr7	74872592	74992296
chr7	75407732	77344992
chr7	77536066	80507054
chr7	80789526	81415576
chr7	81800844	82512856
chr7	83096192	85987876
chr7	86712458	86995156
chr7	88324280	91122956
chr7	91398300	93485388
chr7	93764018	96311458
chr7	97706606	99755210
chr7	99995002	100738856
chr7	100911796	104448284
chr7	104993504	105189846
chr7	106824192	106947016
chr7	109640008	112677630
chr7	113385118	116667414
chr7	116871750	117010804
chr7	118267584	119090634
chr7	120099498	120576764
chr7	120836978	121138730
chr7	121455425	123245392
chr7	123688020	125159502
chr7	125450140	125976910
chr7	126180128	127884672
chr7	128170670	130042650
chr7	130415746	132682436
chr7	135210948	135418422
chr7	135968400	137182352
chr7	137477540	137660948
chr7	138179784	139429168
chr7	139690262	139818634
chr7	140420618	140801070
chr7	141006584	141865088
chr7	141968628	146350987
chr7	146762874	147167442
chr7	147342180	147998682
chr7	149337376	149468518
chr7	149812716	150157220
chr7	150363944	150605026
chr8	3675538	4129544
chr8	4383142	6325988
chr8	6435664	7026422
chr8	7143028	8181138
chr8	8729938	10413858
chr8	11896534	12139676
chr8	12268128	12662720
chr8	12922220	13114284
chr8	13224733	13521804
chr8	13648262	14859916
chr8	15030302	19654632
chr8	22091004	22233146
chr8	22866802	23523734
chr8	24405152	25414934
chr8	25690928	26647538
chr8	26944150	27056932
chr8	27320570	27847286
chr8	28391450	32199528
chr8	33197124	34639290
chr8	35278068	35550522
chr8	36098156	40029674
chr8	40243238	42230722
chr8	42617864	45902796
chr8	46168056	46365788
chr8	47048706	47757106
chr8	47958628	48927004
chr8	49130940	53564846
chr8	53698870	55365862
chr8	55550010	56192124
chr8	58084802	58697066
chr8	58875350	63358028
chr8	63470954	63642628
chr8	64048318	66782346
chr8	67447306	70313824
chr8	70815274	71928128
chr8	74406490	74586540
chr8	75289086	75438078
chr8	75969284	77512646
chr8	77721482	81805656
chr8	82294168	85193592
chr8	85306800	86083180
chr8	87766588	87928862
chr8	88112030	88955492
chr8	89482898	90669138
chr8	90842689	93264290
chr8	93602962	96387708
chr8	97951490	98151198
chr8	98470472	106836954
chr8	107060608	107610178
chr8	110143034	112140400
chr8	112422578	113161356
chr8	114585430	118243606
chr8	118444278	119664768
chr8	120016107	120139880
chr8	120375908	121873428
chr8	123244538	124001774
chr8	126504250	126702074
chr8	126948530	127068224
chr8	127690852	128992872
chr8	129780372	131133968
chr8	131317114	131708518
chr9	3102795	6069220
chr9	6657194	7785128
chr9	8061252	9041207
chr9	9343170	13136176
chr9	14501970	14989948
chr9	15172772	20311460
chr9	20419098	20615782
chr9	22235120	24954370
chr9	25389710	29038606
chr9	29238740	30384624
chr9	30720598	30888230
chr9	31176344	32407180
chr9	32623770	33940034
chr9	34107296	34748150
chr9	35351450	42750756
chr9	43028655	43534803
chr9	45037512	45513578
chr9	46191566	47226286
chr9	47515858	48495628
chr9	48658874	49499602
chr9	49923030	50361444
chr9	50831372	51782716
chr9	52032888	53010810
chr9	53170782	54642294
chr9	54812990	55938362
chr9	59619566	61038238
chr9	61983286	62088954
chr9	62412396	62519066
chr9	67070854	69204062
chr9	69430916	69764024
chr9	71045036	71186892
chr9	72696066	73672438
chr9	73957174	74612896
chr9	75394880	76268630
chr9	76476248	77347182
chr9	78461766	79864806
chr9	80328408	80489604
chr9	80761424	82738196
chr9	82906904	86349070
chr9	86659238	88274582
chr9	89111035	89978102
chr9	90110650	92042708
chr9	92271022	94184176
chr9	94286942	95385636
chr9	95510792	96406894
chr9	97012250	99489626
chr9	99669925	100306444
chr9	100539088	102520144
chr9	103236592	106070926
chr9	106424338	107141222
chr9	109279760	109715050
chr9	111129208	113517274
chr9	113686060	114034146
chr9	114258838	114459928
chr9	114846548	116027706
chr9	116295124	118875962
chr9	119414774	119824337
chr9	120028338	120635740
chr9	120973006	121184850
chr9	121307564	121599680
chr9	121738230	123025216
chr9	123468530	124061552
chrX	4973136	5080496
chrX	5185694	7134990
chrX	8417314	9138130
chrX	9395318	10200012
chrX	13171768	17018370
chrX	17403944	17663216
chrX	17953338	18628026
chrX	18856568	19191172
chrX	19292942	19958500
chrX	20596336	21745466
chrX	21845916	23175694
chrX	23408074	23665886
chrX	33249014	34269652
chrX	35085944	35666892
chrX	36047748	39096688
chrX	39966498	40773788
chrX	40974270	42450838
chrX	42598788	45331806
chrX	45957918	50251640
chrX	50516076	51079892
chrX	53102132	53264949
chrX	53469450	59770916
chrX	59980252	60400862
chrX	60584508	61008236
chrX	61112966	63266866
chrX	63827362	64261178
chrX	64534814	64933476
chrX	65048890	65502142
chrX	65676978	65827164
chrX	65928852	68652636
chrX	68988802	69235980
chrX	69444512	70658232
chrX	71754240	71874466
chrX	72376894	72915580
chrX	73399785	74600188
chrX	74999280	82391576
chrX	82608392	84755014
chrX	85107882	86556434
chrX	86915652	88555330
chrX	88785864	88946658
chrX	89166516	91190452
chrX	91477320	93158392
chrX	93421916	94456650
chrX	94648370	95922886
chrX	96146669	96623880
chrX	96803422	97326830
chrX	97469740	98327720
chrX	99407580	101084098
chrX	101203316	101484246
chrX	101778554	102953714
chrX	103509624	106239424
chrX	106494558	108688972
chrX	108904346	110147388
chrX	110354278	110924938
chrX	111029504	111967528
chrX	112137562	114471502
chrX	114654232	114902436
chrX	115235412	115516712
chrX	115750484	116009640
chrX	116134472	120066696
chrX	122758996	125411200
chrX	125659002	126082804
chrX	126878650	127049754
chrX	127160038	127416344
chrX	127517480	131887554
chrX	132100704	135883344
chrX	136417568	136972824
chrX	137188400	138712678
chrX	138945054	139090992
chrX	139279960	144127211
chrX	146574334	146894452
chrX	147075852	147370412
chrX	147537322	147911278
chrX	149329144	150417312
chrX	150604084	151577364
chrX	151900826	153418360
chrX	153521256	156764786
chrX	156970530	166019744
chrY	249450	801942
chrY	966264	1846558
chrY	2517698	2680472
