# Supplementary material for: The nuclear matrix protein HNRNPU maintains 3D genome architecture globally in mouse hepatocytes
Source: HighWire-hosted journal article supplement (doi:10.1101/gr.224576.117), 2017-12-22
Supplement: Supplemental_Table_S3.xlsx [file Supplemental_Table_S3.xlsx]

## Sheet: Compartment switching
Supplemental Table S3 Regions with compartment switching (mm9).
chr	start	end	Comparment Switching
chr1	21800001	22000000	A to B
chr1	22400001	22600000	A to B
chr1	22600001	22800000	A to B
chr1	61000001	61200000	A to B
chr1	61200001	61400000	A to B
chr1	66400001	66600000	A to B
chr1	68400001	68600000	A to B
chr1	68600001	68800000	A to B
chr1	68800001	69000000	A to B
chr1	69000001	69200000	A to B
chr1	69200001	69400000	A to B
chr1	69800001	70000000	A to B
chr1	70000001	70200000	A to B
chr1	70200001	70400000	A to B
chr1	70400001	70600000	A to B
chr1	70800001	71000000	A to B
chr1	71200001	71400000	A to B
chr1	76800001	77000000	A to B
chr1	77200001	77400000	A to B
chr1	78000001	78200000	A to B
chr1	78600001	78800000	A to B
chr1	80600001	80800000	A to B
chr1	81400001	81600000	A to B
chr1	110200001	110400000	A to B
chr1	110400001	110600000	A to B
chr1	114800001	115000000	A to B
chr1	117600001	117800000	A to B
chr1	139000001	139200000	A to B
chr1	139200001	139400000	A to B
chr1	142000001	142200000	A to B
chr1	142200001	142400000	A to B
chr1	143800001	144000000	A to B
chr1	144000001	144200000	A to B
chr1	145600001	145800000	A to B
chr1	147200001	147400000	A to B
chr1	147400001	147600000	A to B
chr1	155400001	155600000	A to B
chr1	156000001	156200000	A to B
chr1	156200001	156400000	A to B
chr1	156400001	156600000	A to B
chr1	165200001	165400000	A to B
chr1	165600001	165800000	A to B
chr1	166000001	166200000	A to B
chr1	166400001	166600000	A to B
chr1	166600001	166800000	A to B
chr1	167600001	167800000	A to B
chr1	192000001	192200000	A to B
chr2	9000001	9200000	A to B
chr2	12600001	12800000	A to B
chr2	12800001	13000000	A to B
chr2	13600001	13800000	A to B
chr2	13800001	14000000	A to B
chr2	14400001	14600000	A to B
chr2	14600001	14800000	A to B
chr2	14800001	15000000	A to B
chr2	18800001	19000000	A to B
chr2	20200001	20400000	A to B
chr2	21000001	21200000	A to B
chr2	50200001	50400000	A to B
chr2	50400001	50600000	A to B
chr2	51800001	52000000	A to B
chr2	52200001	52400000	A to B
chr2	58600001	58800000	A to B
chr2	62600001	62800000	A to B
chr2	62800001	63000000	A to B
chr2	63000001	63200000	A to B
chr2	65000001	65200000	A to B
chr2	69000001	69200000	A to B
chr2	69200001	69400000	A to B
chr2	69800001	70000000	A to B
chr2	72400001	72600000	A to B
chr2	73200001	73400000	A to B
chr2	73400001	73600000	A to B
chr2	77200001	77400000	A to B
chr2	78000001	78200000	A to B
chr2	78200001	78400000	A to B
chr2	78400001	78600000	A to B
chr2	83600001	83800000	A to B
chr2	83800001	84000000	A to B
chr2	84000001	84200000	A to B
chr2	95200001	95400000	A to B
chr2	95400001	95600000	A to B
chr2	95600001	95800000	A to B
chr2	106800001	107000000	A to B
chr2	107000001	107200000	A to B
chr2	107200001	107400000	A to B
chr2	107400001	107600000	A to B
chr2	107600001	107800000	A to B
chr2	108000001	108200000	A to B
chr2	108600001	108800000	A to B
chr2	108800001	109000000	A to B
chr2	109000001	109200000	A to B
chr2	109200001	109400000	A to B
chr2	113200001	113400000	A to B
chr2	115200001	115400000	A to B
chr2	115400001	115600000	A to B
chr2	115600001	115800000	A to B
chr2	117200001	117400000	A to B
chr2	122000001	122200000	A to B
chr2	125400001	125600000	A to B
chr2	125800001	126000000	A to B
chr2	137600001	137800000	A to B
chr2	140800001	141000000	A to B
chr2	141000001	141200000	A to B
chr2	147000001	147200000	A to B
chr2	161000001	161200000	A to B
chr2	162400001	162600000	A to B
chr2	162600001	162800000	A to B
chr2	163000001	163200000	A to B
chr3	4400001	4600000	A to B
chr3	62800001	63000000	A to B
chr3	66000001	66200000	A to B
chr3	79800001	80000000	A to B
chr3	80600001	80800000	A to B
chr3	87000001	87200000	A to B
chr3	123400001	123600000	A to B
chr3	123600001	123800000	A to B
chr3	123800001	124000000	A to B
chr3	124000001	124200000	A to B
chr3	124200001	124400000	A to B
chr3	124400001	124600000	A to B
chr3	125200001	125400000	A to B
chr3	126600001	126800000	A to B
chr3	130800001	131000000	A to B
chr3	131400001	131600000	A to B
chr3	132000001	132200000	A to B
chr3	133200001	133400000	A to B
chr3	133400001	133600000	A to B
chr3	134000001	134200000	A to B
chr3	137000001	137200000	A to B
chr3	137800001	138000000	A to B
chr3	138800001	139000000	A to B
chr3	139000001	139200000	A to B
chr3	141200001	141400000	A to B
chr3	141400001	141600000	A to B
chr3	141600001	141800000	A to B
chr4	8200001	8400000	A to B
chr4	15400001	15600000	A to B
chr4	15600001	15800000	A to B
chr4	16000001	16200000	A to B
chr4	31800001	32000000	A to B
chr4	48600001	48800000	A to B
chr4	48800001	49000000	A to B
chr4	53000001	53200000	A to B
chr4	53200001	53400000	A to B
chr4	57000001	57200000	A to B
chr4	71600001	71800000	A to B
chr4	80800001	81000000	A to B
chr4	81000001	81200000	A to B
chr4	88200001	88400000	A to B
chr4	92200001	92400000	A to B
chr4	92400001	92600000	A to B
chr4	92600001	92800000	A to B
chr4	92800001	93000000	A to B
chr4	93200001	93400000	A to B
chr4	93400001	93600000	A to B
chr4	93600001	93800000	A to B
chr4	93800001	94000000	A to B
chr4	94000001	94200000	A to B
chr4	100200001	100400000	A to B
chr4	100600001	100800000	A to B
chr4	105400001	105600000	A to B
chr4	105600001	105800000	A to B
chr4	121600001	121800000	A to B
chr4	121800001	122000000	A to B
chr4	122200001	122400000	A to B
chr5	4400001	4600000	A to B
chr5	4600001	4800000	A to B
chr5	4800001	5000000	A to B
chr5	5000001	5200000	A to B
chr5	8800001	9000000	A to B
chr5	10600001	10800000	A to B
chr5	11000001	11200000	A to B
chr5	11200001	11400000	A to B
chr5	11400001	11600000	A to B
chr5	12000001	12200000	A to B
chr5	12200001	12400000	A to B
chr5	12400001	12600000	A to B
chr5	13000001	13200000	A to B
chr5	13200001	13400000	A to B
chr5	17600001	17800000	A to B
chr5	17800001	18000000	A to B
chr5	20800001	21000000	A to B
chr5	29000001	29200000	A to B
chr5	29200001	29400000	A to B
chr5	46200001	46400000	A to B
chr5	46400001	46600000	A to B
chr5	46600001	46800000	A to B
chr5	51600001	51800000	A to B
chr5	52800001	53000000	A to B
chr5	81000001	81200000	A to B
chr5	81200001	81400000	A to B
chr5	82600001	82800000	A to B
chr5	83200001	83400000	A to B
chr5	83400001	83600000	A to B
chr5	85000001	85200000	A to B
chr5	85200001	85400000	A to B
chr5	85600001	85800000	A to B
chr5	86600001	86800000	A to B
chr5	86800001	87000000	A to B
chr5	87000001	87200000	A to B
chr5	87600001	87800000	A to B
chr5	96200001	96400000	A to B
chr5	97600001	97800000	A to B
chr5	97800001	98000000	A to B
chr5	98000001	98200000	A to B
chr5	98600001	98800000	A to B
chr5	98800001	99000000	A to B
chr5	99000001	99200000	A to B
chr5	99200001	99400000	A to B
chr5	99400001	99600000	A to B
chr5	100000001	100200000	A to B
chr5	100200001	100400000	A to B
chr5	100400001	100600000	A to B
chr5	100600001	100800000	A to B
chr5	101200001	101400000	A to B
chr5	101600001	101800000	A to B
chr5	102800001	103000000	A to B
chr5	103200001	103400000	A to B
chr5	103800001	104000000	A to B
chr5	104400001	104600000	A to B
chr5	104600001	104800000	A to B
chr5	105400001	105600000	A to B
chr5	105600001	105800000	A to B
chr5	105800001	106000000	A to B
chr5	107200001	107400000	A to B
chr5	149400001	149600000	A to B
chr5	149600001	149800000	A to B
chr5	149800001	150000000	A to B
chr6	14200001	14400000	A to B
chr6	15800001	16000000	A to B
chr6	40800001	41000000	A to B
chr6	42800001	43000000	A to B
chr6	45600001	45800000	A to B
chr6	48200001	48400000	A to B
chr6	51200001	51400000	A to B
chr6	52000001	52200000	A to B
chr6	52800001	53000000	A to B
chr6	59000001	59200000	A to B
chr6	98600001	98800000	A to B
chr6	104600001	104800000	A to B
chr6	106200001	106400000	A to B
chr6	106400001	106600000	A to B
chr6	128600001	128800000	A to B
chr6	129200001	129400000	A to B
chr6	130800001	131000000	A to B
chr6	131000001	131200000	A to B
chr6	144200001	144400000	A to B
chr6	144800001	145000000	A to B
chr6	148000001	148200000	A to B
chr7	3000001	3200000	A to B
chr7	3400001	3600000	A to B
chr7	3800001	4000000	A to B
chr7	4200001	4400000	A to B
chr7	53400001	53600000	A to B
chr7	61000001	61200000	A to B
chr7	61200001	61400000	A to B
chr7	61400001	61600000	A to B
chr7	68600001	68800000	A to B
chr7	78600001	78800000	A to B
chr7	79800001	80000000	A to B
chr7	80000001	80200000	A to B
chr7	80200001	80400000	A to B
chr7	80800001	81000000	A to B
chr7	81000001	81200000	A to B
chr7	81200001	81400000	A to B
chr7	84400001	84600000	A to B
chr7	84800001	85000000	A to B
chr7	85000001	85200000	A to B
chr7	91400001	91600000	A to B
chr7	95600001	95800000	A to B
chr7	97800001	98000000	A to B
chr7	98000001	98200000	A to B
chr7	98200001	98400000	A to B
chr7	98400001	98600000	A to B
chr7	98600001	98800000	A to B
chr7	100000001	100200000	A to B
chr7	100200001	100400000	A to B
chr7	100400001	100600000	A to B
chr7	101200001	101400000	A to B
chr7	101800001	102000000	A to B
chr7	102000001	102200000	A to B
chr7	102200001	102400000	A to B
chr7	115000001	115200000	A to B
chr7	121400001	121600000	A to B
chr7	123000001	123200000	A to B
chr7	125400001	125600000	A to B
chr7	149800001	150000000	A to B
chr8	4400001	4600000	A to B
chr8	5200001	5400000	A to B
chr8	5400001	5600000	A to B
chr8	5600001	5800000	A to B
chr8	5800001	6000000	A to B
chr8	8800001	9000000	A to B
chr8	10200001	10400000	A to B
chr8	18000001	18200000	A to B
chr8	25800001	26000000	A to B
chr8	27400001	27600000	A to B
chr8	27600001	27800000	A to B
chr8	33400001	33600000	A to B
chr8	36200001	36400000	A to B
chr8	41800001	42000000	A to B
chr8	43000001	43200000	A to B
chr8	66400001	66600000	A to B
chr8	83400001	83600000	A to B
chr8	84000001	84200000	A to B
chr8	85400001	85600000	A to B
chr8	85600001	85800000	A to B
chr8	85800001	86000000	A to B
chr8	130200001	130400000	A to B
chr9	4400001	4600000	A to B
chr9	5600001	5800000	A to B
chr9	42000001	42200000	A to B
chr9	42600001	42800000	A to B
chr9	43200001	43400000	A to B
chr9	43400001	43600000	A to B
chr9	43600001	43800000	A to B
chr9	47000001	47200000	A to B
chr9	49000001	49200000	A to B
chr9	50000001	50200000	A to B
chr9	51000001	51200000	A to B
chr9	52000001	52200000	A to B
chr9	52200001	52400000	A to B
chr9	52400001	52600000	A to B
chr9	52600001	52800000	A to B
chr9	52800001	53000000	A to B
chr9	54200001	54400000	A to B
chr9	59800001	60000000	A to B
chr9	60400001	60600000	A to B
chr9	67400001	67600000	A to B
chr9	69000001	69200000	A to B
chr9	69400001	69600000	A to B
chr9	75400001	75600000	A to B
chr9	75600001	75800000	A to B
chr9	75800001	76000000	A to B
chr9	76000001	76200000	A to B
chr9	76400001	76600000	A to B
chr9	76600001	76800000	A to B
chr9	76800001	77000000	A to B
chr9	78600001	78800000	A to B
chr9	78800001	79000000	A to B
chr9	79600001	79800000	A to B
chr9	81600001	81800000	A to B
chr9	84200001	84400000	A to B
chr9	84600001	84800000	A to B
chr9	84800001	85000000	A to B
chr9	85000001	85200000	A to B
chr9	103800001	104000000	A to B
chr9	114000001	114200000	A to B
chr9	120000001	120200000	A to B
chr9	121400001	121600000	A to B
chr10	4600001	4800000	A to B
chr10	4800001	5000000	A to B
chr10	12800001	13000000	A to B
chr10	26200001	26400000	A to B
chr10	28400001	28600000	A to B
chr10	28600001	28800000	A to B
chr10	28800001	29000000	A to B
chr10	29200001	29400000	A to B
chr10	29400001	29600000	A to B
chr10	29600001	29800000	A to B
chr10	29800001	30000000	A to B
chr10	30000001	30200000	A to B
chr10	32200001	32400000	A to B
chr10	33400001	33600000	A to B
chr10	33600001	33800000	A to B
chr10	33800001	34000000	A to B
chr10	37400001	37600000	A to B
chr10	37600001	37800000	A to B
chr10	37800001	38000000	A to B
chr10	38000001	38200000	A to B
chr10	63600001	63800000	A to B
chr10	63800001	64000000	A to B
chr10	64000001	64200000	A to B
chr10	64600001	64800000	A to B
chr10	64800001	65000000	A to B
chr10	65000001	65200000	A to B
chr10	65200001	65400000	A to B
chr10	65400001	65600000	A to B
chr10	66000001	66200000	A to B
chr10	69800001	70000000	A to B
chr10	70000001	70200000	A to B
chr10	86400001	86600000	A to B
chr10	86600001	86800000	A to B
chr10	86800001	87000000	A to B
chr10	97000001	97200000	A to B
chr10	97200001	97400000	A to B
chr10	97400001	97600000	A to B
chr11	7600001	7800000	A to B
chr11	8600001	8800000	A to B
chr11	21400001	21600000	A to B
chr11	21600001	21800000	A to B
chr11	21800001	22000000	A to B
chr11	31000001	31200000	A to B
chr11	31200001	31400000	A to B
chr11	31400001	31600000	A to B
chr11	31600001	31800000	A to B
chr11	31800001	32000000	A to B
chr11	32000001	32200000	A to B
chr11	43400001	43600000	A to B
chr11	43600001	43800000	A to B
chr11	43800001	44000000	A to B
chr11	48800001	49000000	A to B
chr11	49400001	49600000	A to B
chr11	58000001	58200000	A to B
chr11	58600001	58800000	A to B
chr11	67600001	67800000	A to B
chr11	67800001	68000000	A to B
chr11	99600001	99800000	A to B
chr11	103600001	103800000	A to B
chr11	103800001	104000000	A to B
chr11	104400001	104600000	A to B
chr11	104600001	104800000	A to B
chr11	104800001	105000000	A to B
chr11	108200001	108400000	A to B
chr11	108600001	108800000	A to B
chr11	109600001	109800000	A to B
chr11	109800001	110000000	A to B
chr11	110000001	110200000	A to B
chr11	110200001	110400000	A to B
chr11	112600001	112800000	A to B
chr11	113000001	113200000	A to B
chr11	114600001	114800000	A to B
chr11	114800001	115000000	A to B
chr11	121400001	121600000	A to B
chr12	14400001	14600000	A to B
chr12	34200001	34400000	A to B
chr12	34400001	34600000	A to B
chr12	35200001	35400000	A to B
chr12	36600001	36800000	A to B
chr12	45800001	46000000	A to B
chr12	57600001	57800000	A to B
chr12	66800001	67000000	A to B
chr12	98000001	98200000	A to B
chr12	98200001	98400000	A to B
chr12	100800001	101000000	A to B
chr13	17000001	17200000	A to B
chr13	17200001	17400000	A to B
chr13	18400001	18600000	A to B
chr13	18600001	18800000	A to B
chr13	20000001	20200000	A to B
chr13	20200001	20400000	A to B
chr13	35200001	35400000	A to B
chr13	35600001	35800000	A to B
chr13	37200001	37400000	A to B
chr13	41200001	41400000	A to B
chr13	41800001	42000000	A to B
chr13	42600001	42800000	A to B
chr13	42800001	43000000	A to B
chr13	52600001	52800000	A to B
chr13	54400001	54600000	A to B
chr13	60000001	60200000	A to B
chr13	60400001	60600000	A to B
chr13	62800001	63000000	A to B
chr13	71000001	71200000	A to B
chr13	74200001	74400000	A to B
chr13	93400001	93600000	A to B
chr13	93800001	94000000	A to B
chr13	94200001	94400000	A to B
chr13	94400001	94600000	A to B
chr13	100400001	100600000	A to B
chr13	101600001	101800000	A to B
chr13	101800001	102000000	A to B
chr13	102000001	102200000	A to B
chr13	108200001	108400000	A to B
chr13	109600001	109800000	A to B
chr13	109800001	110000000	A to B
chr13	111000001	111200000	A to B
chr13	113400001	113600000	A to B
chr13	114800001	115000000	A to B
chr14	42400001	42600000	A to B
chr14	42800001	43000000	A to B
chr14	44200001	44400000	A to B
chr14	44400001	44600000	A to B
chr14	44600001	44800000	A to B
chr14	45000001	45200000	A to B
chr14	45200001	45400000	A to B
chr14	45400001	45600000	A to B
chr14	45600001	45800000	A to B
chr14	54400001	54600000	A to B
chr14	56800001	57000000	A to B
chr14	61000001	61200000	A to B
chr14	62400001	62600000	A to B
chr14	62600001	62800000	A to B
chr14	62800001	63000000	A to B
chr14	63000001	63200000	A to B
chr14	75400001	75600000	A to B
chr14	80400001	80600000	A to B
chr14	82400001	82600000	A to B
chr14	82800001	83000000	A to B
chr14	83800001	84000000	A to B
chr14	106600001	106800000	A to B
chr14	106800001	107000000	A to B
chr14	107000001	107200000	A to B
chr14	107400001	107600000	A to B
chr14	115600001	115800000	A to B
chr15	35800001	36000000	A to B
chr15	40000001	40200000	A to B
chr15	40200001	40400000	A to B
chr15	40400001	40600000	A to B
chr15	40600001	40800000	A to B
chr15	40800001	41000000	A to B
chr15	41000001	41200000	A to B
chr15	42000001	42200000	A to B
chr15	42200001	42400000	A to B
chr15	42400001	42600000	A to B
chr15	50400001	50600000	A to B
chr15	50800001	51000000	A to B
chr15	51200001	51400000	A to B
chr15	54400001	54600000	A to B
chr15	64600001	64800000	A to B
chr15	64800001	65000000	A to B
chr15	65000001	65200000	A to B
chr15	65200001	65400000	A to B
chr15	65400001	65600000	A to B
chr15	65600001	65800000	A to B
chr15	67400001	67600000	A to B
chr15	67600001	67800000	A to B
chr15	67800001	68000000	A to B
chr15	82200001	82400000	A to B
chr15	82400001	82600000	A to B
chr15	102600001	102800000	A to B
chr16	21600001	21800000	A to B
chr16	22400001	22600000	A to B
chr16	22600001	22800000	A to B
chr16	25600001	25800000	A to B
chr16	25800001	26000000	A to B
chr16	35400001	35600000	A to B
chr16	37000001	37200000	A to B
chr16	37400001	37600000	A to B
chr16	37600001	37800000	A to B
chr16	44800001	45000000	A to B
chr16	46400001	46600000	A to B
chr16	46600001	46800000	A to B
chr16	47000001	47200000	A to B
chr16	56600001	56800000	A to B
chr16	56800001	57000000	A to B
chr16	72200001	72400000	A to B
chr16	72600001	72800000	A to B
chr16	72800001	73000000	A to B
chr16	74200001	74400000	A to B
chr16	76800001	77000000	A to B
chr16	80000001	80200000	A to B
chr16	93200001	93400000	A to B
chr16	93400001	93600000	A to B
chr16	96600001	96800000	A to B
chr16	97000001	97200000	A to B
chr16	97200001	97400000	A to B
chr16	97400001	97600000	A to B
chr17	14200001	14400000	A to B
chr17	15200001	15400000	A to B
chr17	43800001	44000000	A to B
chr17	45200001	45400000	A to B
chr17	78800001	79000000	A to B
chr17	79600001	79800000	A to B
chr17	81400001	81600000	A to B
chr17	82000001	82200000	A to B
chr17	82200001	82400000	A to B
chr17	82800001	83000000	A to B
chr17	83400001	83600000	A to B
chr17	92200001	92400000	A to B
chr18	9600001	9800000	A to B
chr18	33800001	34000000	A to B
chr18	43800001	44000000	A to B
chr18	44000001	44200000	A to B
chr18	53600001	53800000	A to B
chr18	54200001	54400000	A to B
chr18	54400001	54600000	A to B
chr18	55800001	56000000	A to B
chr18	56000001	56200000	A to B
chr18	57200001	57400000	A to B
chr18	78800001	79000000	A to B
chr18	79000001	79200000	A to B
chr18	79200001	79400000	A to B
chr18	86800001	87000000	A to B
chr18	87000001	87200000	A to B
chr18	89200001	89400000	A to B
chr18	89400001	89600000	A to B
chr18	89600001	89800000	A to B
chr18	89800001	90000000	A to B
chr18	90000001	90200000	A to B
chr19	11200001	11400000	A to B
chr19	11600001	11800000	A to B
chr19	12600001	12800000	A to B
chr19	12800001	13000000	A to B
chr19	19400001	19600000	A to B
chr19	20800001	21000000	A to B
chr19	21000001	21200000	A to B
chr19	21400001	21600000	A to B
chr19	21600001	21800000	A to B
chr19	23600001	23800000	A to B
chr19	23800001	24000000	A to B
chr19	26800001	27000000	A to B
chr19	27000001	27200000	A to B
chr19	34800001	35000000	A to B
chr19	36600001	36800000	A to B
chr19	38400001	38600000	A to B
chr19	38600001	38800000	A to B
chr19	39400001	39600000	A to B
chr19	39600001	39800000	A to B
chr19	39800001	40000000	A to B
chr19	40000001	40200000	A to B
chr19	40200001	40400000	A to B
chr19	41000001	41200000	A to B
chrX	29600001	29800000	A to B
chrX	33200001	33400000	A to B
chrX	65400001	65600000	A to B
chrX	81200001	81400000	A to B
chrX	81800001	82000000	A to B
chrX	84600001	84800000	A to B
chrX	90000001	90200000	A to B
chrX	100000001	100200000	A to B
chrX	101200001	101400000	A to B
chrX	102000001	102200000	A to B
chrX	116600001	116800000	A to B
chrX	141000001	141200000	A to B
chrX	142200001	142400000	A to B
chrX	162000001	162200000	A to B
chrX	164000001	164200000	A to B
chrX	164800001	165000000	A to B
chr1	4600001	4800000	B to A
chr1	5000001	5200000	B to A
chr1	6200001	6400000	B to A
chr1	7000001	7200000	B to A
chr1	13000001	13200000	B to A
chr1	24600001	24800000	B to A
chr1	34800001	35000000	B to A
chr1	40400001	40600000	B to A
chr1	43000001	43200000	B to A
chr1	84600001	84800000	B to A
chr1	84800001	85000000	B to A
chr1	92200001	92400000	B to A
chr1	123200001	123400000	B to A
chr1	125200001	125400000	B to A
chr1	128400001	128600000	B to A
chr1	131200001	131400000	B to A
chr1	169200001	169400000	B to A
chr1	175800001	176000000	B to A
chr1	180000001	180200000	B to A
chr1	181200001	181400000	B to A
chr1	189000001	189200000	B to A
chr2	6400001	6600000	B to A
chr2	15000001	15200000	B to A
chr2	18200001	18400000	B to A
chr2	27800001	28000000	B to A
chr2	28000001	28200000	B to A
chr2	112000001	112200000	B to A
chr2	130000001	130200000	B to A
chr2	168000001	168200000	B to A
chr2	173000001	173200000	B to A
chr3	7200001	7400000	B to A
chr3	8000001	8200000	B to A
chr3	10400001	10600000	B to A
chr3	16000001	16200000	B to A
chr3	19600001	19800000	B to A
chr3	20000001	20200000	B to A
chr3	22800001	23000000	B to A
chr3	31000001	31200000	B to A
chr3	32400001	32600000	B to A
chr3	33800001	34000000	B to A
chr3	50200001	50400000	B to A
chr3	50400001	50600000	B to A
chr3	52200001	52400000	B to A
chr3	56600001	56800000	B to A
chr3	56800001	57000000	B to A
chr3	57600001	57800000	B to A
chr3	61200001	61400000	B to A
chr3	67200001	67400000	B to A
chr3	70000001	70200000	B to A
chr3	91800001	92000000	B to A
chr3	98800001	99000000	B to A
chr3	100000001	100200000	B to A
chr3	105000001	105200000	B to A
chr3	106400001	106600000	B to A
chr3	109400001	109600000	B to A
chr3	113200001	113400000	B to A
chr3	115200001	115400000	B to A
chr3	116800001	117000000	B to A
chr3	117400001	117600000	B to A
chr3	129200001	129400000	B to A
chr3	151600001	151800000	B to A
chr3	152400001	152600000	B to A
chr3	153400001	153600000	B to A
chr3	154200001	154400000	B to A
chr3	154400001	154600000	B to A
chr3	154600001	154800000	B to A
chr3	157200001	157400000	B to A
chr3	159000001	159200000	B to A
chr4	19400001	19600000	B to A
chr4	20600001	20800000	B to A
chr4	41600001	41800000	B to A
chr4	42800001	43000000	B to A
chr4	44600001	44800000	B to A
chr4	54800001	55000000	B to A
chr4	59800001	60000000	B to A
chr4	71800001	72000000	B to A
chr4	76800001	77000000	B to A
chr4	77800001	78000000	B to A
chr4	82800001	83000000	B to A
chr4	141600001	141800000	B to A
chr4	150400001	150600000	B to A
chr5	3000001	3200000	B to A
chr5	38400001	38600000	B to A
chr5	38800001	39000000	B to A
chr5	42000001	42200000	B to A
chr5	43400001	43600000	B to A
chr5	63000001	63200000	B to A
chr5	67000001	67200000	B to A
chr5	77800001	78000000	B to A
chr5	113400001	113600000	B to A
chr5	116400001	116600000	B to A
chr5	130000001	130200000	B to A
chr5	145200001	145400000	B to A
chr5	148400001	148600000	B to A
chr6	3400001	3600000	B to A
chr6	7600001	7800000	B to A
chr6	8200001	8400000	B to A
chr6	32600001	32800000	B to A
chr6	35400001	35600000	B to A
chr6	40200001	40400000	B to A
chr6	56800001	57000000	B to A
chr6	57400001	57600000	B to A
chr6	58400001	58600000	B to A
chr6	60600001	60800000	B to A
chr6	65000001	65200000	B to A
chr6	67200001	67400000	B to A
chr6	67800001	68000000	B to A
chr6	95600001	95800000	B to A
chr6	114200001	114400000	B to A
chr6	122600001	122800000	B to A
chr6	125800001	126000000	B to A
chr6	127000001	127200000	B to A
chr6	127200001	127400000	B to A
chr6	136400001	136600000	B to A
chr6	136600001	136800000	B to A
chr6	137600001	137800000	B to A
chr6	138000001	138200000	B to A
chr6	139400001	139600000	B to A
chr7	5000001	5200000	B to A
chr7	17600001	17800000	B to A
chr7	26600001	26800000	B to A
chr7	27800001	28000000	B to A
chr7	34800001	35000000	B to A
chr7	57000001	57200000	B to A
chr7	59000001	59200000	B to A
chr7	66400001	66600000	B to A
chr7	69200001	69400000	B to A
chr7	109600001	109800000	B to A
chr7	119000001	119200000	B to A
chr7	129200001	129400000	B to A
chr7	144200001	144400000	B to A
chr8	14800001	15000000	B to A
chr8	22800001	23000000	B to A
chr8	23000001	23200000	B to A
chr8	48800001	49000000	B to A
chr8	49000001	49200000	B to A
chr8	55400001	55600000	B to A
chr8	55600001	55800000	B to A
chr8	59800001	60000000	B to A
chr8	60000001	60200000	B to A
chr8	77600001	77800000	B to A
chr8	80000001	80200000	B to A
chr8	82200001	82400000	B to A
chr8	89400001	89600000	B to A
chr8	90800001	91000000	B to A
chr8	91200001	91400000	B to A
chr8	120000001	120200000	B to A
chr8	120800001	121000000	B to A
chr9	15000001	15200000	B to A
chr9	40000001	40200000	B to A
chr9	82800001	83000000	B to A
chr9	89800001	90000000	B to A
chr9	92000001	92200000	B to A
chr9	98400001	98600000	B to A
chr9	101000001	101200000	B to A
chr9	111800001	112000000	B to A
chr9	114800001	115000000	B to A
chr9	115000001	115200000	B to A
chr9	116000001	116200000	B to A
chr10	3200001	3400000	B to A
chr10	7200001	7400000	B to A
chr10	12000001	12200000	B to A
chr10	34200001	34400000	B to A
chr10	39200001	39400000	B to A
chr10	49200001	49400000	B to A
chr10	50400001	50600000	B to A
chr10	53000001	53200000	B to A
chr10	53600001	53800000	B to A
chr10	82000001	82200000	B to A
chr10	83000001	83200000	B to A
chr10	83800001	84000000	B to A
chr10	85200001	85400000	B to A
chr10	90400001	90600000	B to A
chr10	90600001	90800000	B to A
chr10	92400001	92600000	B to A
chr10	107200001	107400000	B to A
chr10	117200001	117400000	B to A
chr10	118200001	118400000	B to A
chr10	121000001	121200000	B to A
chr10	122400001	122600000	B to A
chr10	123400001	123600000	B to A
chr10	123600001	123800000	B to A
chr10	126200001	126400000	B to A
chr10	128400001	128600000	B to A
chr11	55200001	55400000	B to A
chr12	5000001	5200000	B to A
chr12	10200001	10400000	B to A
chr12	10800001	11000000	B to A
chr12	11000001	11200000	B to A
chr12	16400001	16600000	B to A
chr12	17800001	18000000	B to A
chr12	29800001	30000000	B to A
chr12	31400001	31600000	B to A
chr12	45200001	45400000	B to A
chr12	54000001	54200000	B to A
chr12	59800001	60000000	B to A
chr12	82800001	83000000	B to A
chr12	89600001	89800000	B to A
chr12	92200001	92400000	B to A
chr12	92600001	92800000	B to A
chr12	104600001	104800000	B to A
chr12	105800001	106000000	B to A
chr12	106200001	106400000	B to A
chr12	109200001	109400000	B to A
chr12	117200001	117400000	B to A
chr12	120600001	120800000	B to A
chr13	3400001	3600000	B to A
chr13	12400001	12600000	B to A
chr13	12800001	13000000	B to A
chr13	13000001	13200000	B to A
chr13	21200001	21400000	B to A
chr13	40800001	41000000	B to A
chr13	51200001	51400000	B to A
chr13	56800001	57000000	B to A
chr13	67000001	67200000	B to A
chr13	69600001	69800000	B to A
chr13	70400001	70600000	B to A
chr13	77200001	77400000	B to A
chr13	77800001	78000000	B to A
chr13	78000001	78200000	B to A
chr13	78200001	78400000	B to A
chr13	78600001	78800000	B to A
chr13	79000001	79200000	B to A
chr13	81000001	81200000	B to A
chr13	81800001	82000000	B to A
chr13	85200001	85400000	B to A
chr13	87000001	87200000	B to A
chr13	89600001	89800000	B to A
chr13	104400001	104600000	B to A
chr13	120200001	120284312	B to A
chr14	9400001	9600000	B to A
chr14	12000001	12200000	B to A
chr14	13000001	13200000	B to A
chr14	24800001	25000000	B to A
chr14	34200001	34400000	B to A
chr14	34800001	35000000	B to A
chr14	37400001	37600000	B to A
chr14	37800001	38000000	B to A
chr14	49800001	50000000	B to A
chr14	58800001	59000000	B to A
chr14	72800001	73000000	B to A
chr14	87200001	87400000	B to A
chr14	87800001	88000000	B to A
chr14	102400001	102600000	B to A
chr14	116400001	116600000	B to A
chr14	120400001	120600000	B to A
chr15	9000001	9200000	B to A
chr15	12200001	12400000	B to A
chr15	23400001	23600000	B to A
chr15	31000001	31200000	B to A
chr15	31200001	31400000	B to A
chr15	72400001	72600000	B to A
chr15	72600001	72800000	B to A
chr15	74000001	74200000	B to A
chr15	83400001	83600000	B to A
chr15	86200001	86400000	B to A
chr15	87400001	87600000	B to A
chr15	93000001	93200000	B to A
chr15	93200001	93400000	B to A
chr16	3600001	3800000	B to A
chr16	5200001	5400000	B to A
chr16	39000001	39200000	B to A
chr16	42400001	42600000	B to A
chr16	64800001	65000000	B to A
chr16	83400001	83600000	B to A
chr16	87600001	87800000	B to A
chr16	90200001	90400000	B to A
chr17	8200001	8400000	B to A
chr17	10000001	10200000	B to A
chr17	12200001	12400000	B to A
chr17	13600001	13800000	B to A
chr17	22400001	22600000	B to A
chr17	49800001	50000000	B to A
chr17	51200001	51400000	B to A
chr17	61800001	62000000	B to A
chr17	73000001	73200000	B to A
chr17	95200001	95272651	B to A
chr18	14800001	15000000	B to A
chr18	15000001	15200000	B to A
chr18	19600001	19800000	B to A
chr18	21200001	21400000	B to A
chr18	23800001	24000000	B to A
chr18	25800001	26000000	B to A
chr18	31600001	31800000	B to A
chr18	37800001	38000000	B to A
chr18	46200001	46400000	B to A
chr18	47000001	47200000	B to A
chr18	53200001	53400000	B to A
chr18	62600001	62800000	B to A
chr18	69600001	69800000	B to A
chr18	73600001	73800000	B to A
chr18	76200001	76400000	B to A
chr18	76400001	76600000	B to A
chr18	77200001	77400000	B to A
chr18	84000001	84200000	B to A
chr19	47800001	48000000	B to A
chrX	8400001	8600000	B to A
chrX	23000001	23200000	B to A
chrX	23800001	24000000	B to A
chrX	24200001	24400000	B to A
chrX	24600001	24800000	B to A
chrX	25800001	26000000	B to A
chrX	29200001	29400000	B to A
chrX	36000001	36200000	B to A
chrX	48200001	48400000	B to A
chrX	49000001	49200000	B to A
chrX	49600001	49800000	B to A
chrX	50800001	51000000	B to A
chrX	53600001	53800000	B to A
chrX	56200001	56400000	B to A
chrX	57400001	57600000	B to A
chrX	57600001	57800000	B to A
chrX	74000001	74200000	B to A
chrX	75000001	75200000	B to A
chrX	75600001	75800000	B to A
chrX	75800001	76000000	B to A
chrX	76600001	76800000	B to A
chrX	85000001	85200000	B to A
chrX	93000001	93200000	B to A
chrX	103400001	103600000	B to A
chrX	103800001	104000000	B to A
chrX	108600001	108800000	B to A
chrX	109400001	109600000	B to A
chrX	110000001	110200000	B to A
chrX	120200001	120400000	B to A
chrX	124000001	124200000	B to A
chrX	124400001	124600000	B to A
chrX	132200001	132400000	B to A
chrX	153800001	154000000	B to A
chrX	154000001	154200000	B to A
chrX	159000001	159200000	B to A
chrX	159400001	159600000	B to A
chrX	160200001	160400000	B to A
