# Supplementary material for: The nuclear matrix protein HNRNPU maintains 3D genome architecture globally in mouse hepatocytes
Source: HighWire-hosted journal article supplement (doi:10.1101/gr.224576.117), 2017-12-22
Supplement: Supplemental_Table_S4.xlsx [file Supplemental_Table_S4.xlsx]

## Sheet: boundary
Supplemental Table S4 Coordinates (mm9) of TAD boundaries and their strengths in each sample.
chr	start	end	shCtrl_rep1	shCtrl_rep2	shU_rep1	shU_rep2
chr1	3640001	3720000	1.09509	1.12753	0.865396	0.89818
chr1	4480001	4560000	0.693535	0.720622	NA	NA
chr1	5040001	5200000	0.71906	0.711632	0.420452	0.617362
chr1	6240001	6320000	0.86519	0.858096	0.576907	0.702206
chr1	7280001	7400000	1.05632	1.02417	0.696771	0.718926
chr1	8080001	8200000	0.274533	0.314431	NA	NA
chr1	9560001	9640000	3.25037	3.13308	1.96516	1.96066
chr1	10800001	10880000	0.146317	0.234093	0.406958	0.414693
chr1	11520001	11600000	0.910991	1.05251	0.832918	0.879942
chr1	13000001	13040000	1.54991	1.53808	1.78475	1.75874
chr1	13680001	13760000	1.77125	1.75205	1.35519	1.32595
chr1	14800001	14880000	1.43869	1.44901	1.291	1.38047
chr1	15760001	15840000	0.904364	1.01583	0.745292	0.888234
chr1	16520001	16560000	NA	NA	0.380823	0.375402
chr1	17000001	17080000	0.525792	0.531832	0.61957	0.637312
chr1	18160001	18200000	1.2347	1.2575	0.951644	1.02049
chr1	19120001	19160000	2.51464	2.46182	1.58916	1.64879
chr1	20120001	20240000	1.42128	1.45545	1.68583	1.73447
chr1	21200001	21280000	1.12638	0.999523	0.868544	0.844032
chr1	22400001	22480000	0.774499	0.829089	1.05395	1.00068
chr1	24200001	24280000	1.03826	1.0915	1.0491	1.15452
chr1	25040001	25200000	0.257724	0.22142	0.32736	0.313034
chr1	25760001	25840000	0.655306	0.683887	0.263047	0.415432
chr1	26880001	27000000	0.295048	0.362578	0.401578	0.35808
chr1	28200001	28360000	0.594194	0.706766	0.737183	0.649808
chr1	29400001	29480000	0.381393	0.433079	0.441591	0.482212
chr1	30680001	30760000	2.13856	2.2431	1.66329	1.66528
chr1	31320001	31400000	1.6898	1.74561	1.31516	1.28578
chr1	32040001	32160000	0.203813	0.151344	NA	NA
chr1	32840001	32880000	NA	NA	0.318413	0.329126
chr1	32960001	33000000	0.300876	0.263743	NA	NA
chr1	33800001	33880000	1.05285	0.900993	0.670183	0.58258
chr1	34360001	34440000	0.38734	0.530725	0.385181	0.321406
chr1	34840001	35000000	NA	NA	0.42773	0.431812
chr1	36240001	36280000	1.41745	1.52841	0.91627	0.958503
chr1	38200001	38320000	1.69162	1.60246	1.39217	1.39097
chr1	38960001	39040000	0.847986	0.783812	0.453478	0.56781
chr1	39600001	39640000	1.02849	0.957658	0.980561	1.03554
chr1	40800001	40880000	1.14197	1.13639	1.23579	1.26018
chr1	42040001	42120000	0.446381	0.548576	NA	NA
chr1	43000001	43120000	2.39502	2.37863	1.65917	1.73676
chr1	44200001	44320000	2.92974	2.84299	1.95953	2.06356
chr1	45800001	45880000	0.897339	0.832205	0.857823	0.82089
chr1	46560001	46680000	0.699228	0.615229	0.478922	0.606011
chr1	47720001	47920000	0.190986	0.305261	0.135108	0.264246
chr1	48680001	48720000	0.164011	0.158224	NA	NA
chr1	49920001	50040000	0.186562	0.228775	NA	NA
chr1	50880001	51000000	0.724856	0.795803	0.511805	0.475582
chr1	51600001	51680000	0.875483	0.910362	0.721506	0.757479
chr1	52200001	52240000	1.08736	1.02971	0.961048	1.17113
chr1	52960001	53040000	0.935731	0.928785	0.904512	0.889929
chr1	53560001	53640000	NA	NA	0.326704	0.335189
chr1	54560001	54640000	1.08341	1.09422	0.88517	0.963441
chr1	55200001	55280000	1.80031	1.56735	1.27307	1.26754
chr1	55960001	56040000	1.26957	1.23522	1.05464	0.897387
chr1	57320001	57440000	1.56209	1.48436	1.73779	1.86252
chr1	58480001	58560000	1.51591	1.44571	1.65643	1.63841
chr1	59800001	59880000	1.00003	0.976269	0.940663	0.867952
chr1	60320001	60440000	0.462058	0.568956	0.470559	0.548402
chr1	61040001	61080000	1.36059	1.33746	0.756705	0.934101
chr1	61840001	61960000	0.349953	0.387144	NA	NA
chr1	63160001	63200000	1.4971	1.35167	1.74227	1.79359
chr1	64640001	64720000	1.35598	1.41376	1.20377	1.15455
chr1	65240001	65280000	2.90163	2.90971	2.31867	2.45369
chr1	66040001	66120000	1.14009	1.22677	0.905651	0.840858
chr1	67000001	67080000	1.70819	1.62298	1.39114	1.25616
chr1	68160001	68240000	0.466791	0.516684	0.54935	0.538736
chr1	69240001	69280000	2.00865	1.99279	1.99627	1.94747
chr1	69840001	69920000	1.20131	1.13491	1.13866	1.14162
chr1	71560001	71600000	1.38367	1.57905	1.15896	1.2391
chr1	72280001	72360000	2.21114	2.22813	1.87492	1.89095
chr1	73960001	74000000	NA	NA	1.68444	1.6423
chr1	74160001	74200000	1.29987	1.37842	NA	NA
chr1	75480001	75560000	2.44487	2.47088	2.11358	2.21668
chr1	76560001	76600000	0.317286	0.400832	0.346837	0.382353
chr1	77920001	77960000	0.528051	0.474013	0.906771	0.812983
chr1	78560001	78640000	1.52469	1.66414	1.22566	1.25953
chr1	79680001	79760000	1.34109	1.25633	1.28111	1.35848
chr1	80640001	80720000	0.796203	0.798222	0.461102	0.379619
chr1	81320001	81400000	2.02053	2.01666	1.62356	1.6974
chr1	82480001	82560000	1.65146	1.67897	1.49241	1.57854
chr1	83080001	83120000	0.695491	0.712986	NA	NA
chr1	83680001	83760000	0.66907	0.665992	0.815009	0.743091
chr1	89160001	89200000	0.957399	1.13902	0.979604	0.919932
chr1	89960001	90160000	0.902447	0.916068	0.958521	0.932377
chr1	91640001	91840000	1.18988	1.26075	1.42739	1.54663
chr1	92800001	92880000	1.0958	1.24148	0.983699	1.09025
chr1	93160001	93320000	0.71038	0.766511	0.60795	0.67374
chr1	94880001	94920000	0.986485	1.00749	0.833925	0.778173
chr1	95800001	95880000	2.26106	2.17182	2.03976	2.06681
chr1	96880001	96960000	0.372459	0.368482	0.260871	0.286495
chr1	97800001	97880000	0.855324	0.781666	0.760066	0.756828
chr1	98720001	98800000	1.08894	1.18866	0.812754	0.965352
chr1	99600001	99640000	1.30682	1.44607	0.929294	1.05982
chr1	100400001	100440000	1.22561	1.31691	1.09667	1.0089
chr1	101440001	101600000	1.11312	1.05093	0.766212	0.767502
chr1	102320001	102400000	0.631407	0.639143	0.667135	0.713837
chr1	105680001	105760000	1.17018	1.16442	0.62065	0.531404
chr1	106760001	106840000	1.97507	1.82581	1.4484	1.4012
chr1	107600001	107680000	1.83257	1.84152	1.97444	1.92036
chr1	108760001	108840000	2.82736	2.50367	2.32438	2.48335
chr1	109440001	109520000	2.5773	2.63471	1.68503	1.65662
chr1	110760001	110840000	0.676044	0.697076	NA	NA
chr1	111840001	111920000	0.137697	0.12761	NA	NA
chr1	112000001	112040000	NA	NA	0.157786	0.222314
chr1	113520001	113600000	1.25649	1.20852	1.28708	1.25689
chr1	114400001	114480000	2.32899	2.40937	2.35481	2.34004
chr1	115560001	115640000	0.334432	0.311221	0.328466	0.311761
chr1	116400001	116480000	0.259877	0.280868	0.563317	0.59085
chr1	117480001	117560000	1.05909	1.06624	0.90694	0.911077
chr1	118400001	118440000	0.86893	0.961567	NA	NA
chr1	119440001	119520000	0.831456	0.790224	0.424848	0.482103
chr1	120160001	120240000	2.20804	2.09536	1.52885	1.61519
chr1	121320001	121400000	NA	NA	0.387908	0.42077
chr1	121960001	122040000	1.10333	1.13842	0.656246	0.746767
chr1	123400001	123520000	1.71925	1.65088	1.50044	1.51212
chr1	124320001	124400000	0.270979	0.345357	0.237739	0.326758
chr1	125080001	125240000	0.981806	0.879399	0.444525	0.525639
chr1	125960001	126040000	0.666553	0.690395	0.759112	0.795195
chr1	126560001	126680000	1.06673	1.14233	0.589018	0.465689
chr1	127200001	127280000	1.58431	1.53447	1.61473	1.5841
chr1	128200001	128360000	0.43275	0.366976	0.321716	0.398495
chr1	128880001	128960000	1.15133	1.26262	1.36499	1.29637
chr1	129640001	129760000	0.435712	0.389421	0.390496	0.468042
chr1	130240001	130280000	1.443	1.25252	1.11442	1.24526
chr1	130680001	130840000	0.493977	0.505062	NA	NA
chr1	132440001	132480000	1.61576	1.55453	1.35356	1.3957
chr1	133000001	133120000	1.0233	1.19425	1.27669	1.33964
chr1	133760001	133840000	0.172581	0.260759	NA	NA
chr1	134280001	134320000	NA	NA	0.308725	0.402739
chr1	134920001	135000000	1.36924	1.4938	1.26404	1.32957
chr1	136080001	136160000	NA	NA	0.653892	0.577786
chr1	136240001	136280000	0.322646	0.406329	NA	NA
chr1	136960001	137080000	0.152168	0.222634	0.405522	0.388149
chr1	137720001	137800000	0.279398	0.272126	0.416928	0.526808
chr1	138280001	138400000	1.1309	1.24801	1.02698	1.07939
chr1	139160001	139200000	1.52869	1.51948	1.12268	1.24216
chr1	140000001	140040000	2.08672	2.05939	1.80358	1.73454
chr1	141240001	141320000	2.20134	2.37877	1.98916	2.18236
chr1	141920001	141960000	0.649293	0.629672	NA	NA
chr1	142560001	142640000	1.51383	1.51155	1.05547	1.1431
chr1	143560001	143640000	NA	NA	0.364019	0.336956
chr1	143760001	143840000	0.603321	0.648429	NA	NA
chr1	144760001	144880000	0.730514	0.666811	0.480518	0.542589
chr1	145560001	145640000	1.84735	1.76029	1.30728	1.39861
chr1	146080001	146240000	0.703984	0.707464	0.402097	0.340325
chr1	146960001	147040000	0.160873	0.14449	NA	NA
chr1	148760001	148920000	0.507611	0.363208	0.500384	0.415867
chr1	149760001	149920000	0.312188	0.288193	0.164097	0.127718
chr1	150960001	151000000	0.202492	0.304793	NA	NA
chr1	151560001	151640000	1.32402	1.30019	0.833977	0.846225
chr1	152240001	152280000	1.248	1.21112	1.26522	1.31128
chr1	153400001	153520000	1.11747	1.14985	1.47834	1.55795
chr1	154360001	154520000	0.920268	1.02475	0.472998	0.459334
chr1	155320001	155360000	2.15311	2.18604	2.97157	3.06919
chr1	156000001	156080000	0.661304	0.593892	NA	NA
chr1	156800001	156920000	0.865519	0.873545	0.882188	0.739933
chr1	157760001	157840000	0.581221	0.75126	0.939134	0.859379
chr1	158600001	158640000	1.00655	1.21515	0.843522	0.862201
chr1	159320001	159440000	1.53645	1.56153	1.08606	1.16354
chr1	161120001	161200000	3.79524	3.92681	2.85829	2.83032
chr1	162120001	162200000	1.72504	1.76709	1.7095	1.65529
chr1	163000001	163080000	1.13115	1.20189	0.943769	0.967157
chr1	163800001	163840000	0.912454	0.930605	1.12128	1.12059
chr1	164600001	164720000	1.33077	1.38372	0.984605	0.925041
chr1	166040001	166120000	2.28822	2.32468	1.88228	1.9342
chr1	167200001	167280000	1.60176	1.64842	1.77857	1.82004
chr1	168320001	168440000	1.38232	1.28552	1.24735	1.25332
chr1	169400001	169480000	NA	NA	0.531931	0.505031
chr1	169960001	170040000	1.46773	1.54816	1.26467	1.2644
chr1	171400001	171440000	1.64413	1.75696	1.9454	1.7701
chr1	172080001	172120000	1.46474	1.43865	1.05301	0.810155
chr1	173400001	173480000	1.80795	1.55235	1.3441	1.29951
chr1	173920001	174040000	0.289826	0.127271	NA	NA
chr1	174360001	174400000	NA	NA	1.10308	1.00571
chr1	175320001	175400000	2.33682	2.41545	2.63565	2.49674
chr1	176440001	176480000	0.63855	0.61824	0.981973	0.918919
chr1	177800001	177840000	1.13406	1.15445	1.19507	1.1823
chr1	178640001	178720000	3.35931	3.32716	2.6353	2.56618
chr1	179720001	179760000	2.26918	2.35686	1.79071	1.72616
chr1	180440001	180480000	0.99803	1.05471	0.747447	0.948905
chr1	181560001	181600000	2.08859	2.03774	1.7751	1.83303
chr1	182920001	183080000	1.12517	1.072	1.03678	1.08425
chr1	183560001	183640000	NA	NA	0.237061	0.305974
chr1	186000001	186160000	0.742998	0.786455	0.812516	0.83156
chr1	187280001	187320000	1.7842	1.94646	2.14012	2.04424
chr1	188600001	188640000	2.22494	2.09159	1.9262	1.91564
chr1	189360001	189400000	NA	NA	0.178682	0.204547
chr1	190640001	190720000	1.25586	1.19131	1.22853	1.39914
chr1	191480001	191520000	2.29061	2.42887	1.60021	1.54205
chr1	192760001	192800000	2.72813	2.65277	2.58256	2.74632
chr1	193840001	193920000	1.12496	1.24916	1.11462	0.987452
chr1	195040001	195120000	1.31061	1.42728	1.16743	1.03206
chr1	196400001	196440000	NA	NA	0.719017	0.630219
chr10	4520001	4680000	1.45093	1.46657	0.754989	0.748594
chr10	5320001	5360000	0.67701	0.700915	0.377653	0.514474
chr10	5880001	5920000	1.88365	1.84402	2.59627	2.42916
chr10	6400001	6480000	2.27336	2.11921	2.76394	2.71411
chr10	7240001	7320000	4.12795	4.32166	3.93586	3.7794
chr10	8120001	8240000	NA	NA	0.552625	0.462727
chr10	9520001	9600000	1.35956	1.33129	1.366	1.29595
chr10	11040001	11120000	0.703749	0.726661	NA	NA
chr10	11200001	11240000	NA	NA	0.256682	0.319773
chr10	11680001	11760000	0.344286	0.20804	NA	NA
chr10	12480001	12560000	1.34704	1.22564	0.907236	0.915415
chr10	13160001	13280000	0.596236	0.667291	0.612999	0.615481
chr10	14120001	14160000	1.30262	1.36413	1.27911	1.26197
chr10	14960001	15000000	0.70609	0.729724	0.760353	0.695599
chr10	16320001	16360000	0.54824	0.562529	0.307944	0.353525
chr10	17560001	17600000	1.29814	1.21217	1.26872	1.31174
chr10	18440001	18480000	NA	NA	0.789527	0.875317
chr10	19920001	20000000	2.09157	2.01865	1.55705	1.48271
chr10	21000001	21040000	2.55593	2.70532	2.80778	2.8926
chr10	21840001	21880000	1.02189	1.01478	0.879463	0.878271
chr10	22280001	22320000	NA	NA	0.241461	0.188818
chr10	23560001	23640000	1.75537	1.71608	1.247	1.16901
chr10	24520001	24600000	1.53939	1.53158	1.44592	1.41982
chr10	25200001	25280000	0.897872	0.804843	0.492075	0.528756
chr10	26040001	26080000	1.32494	1.34238	1.43865	1.32585
chr10	26680001	26760000	1.39969	1.35507	1.09791	1.06909
chr10	27560001	27640000	0.642587	0.523597	0.582522	0.546423
chr10	28520001	28640000	0.516896	0.49799	1.18012	1.21688
chr10	29080001	29120000	1.17901	1.06936	NA	NA
chr10	30280001	30400000	1.40566	1.47027	1.08015	1.0512
chr10	31120001	31240000	1.00574	1.05441	0.242294	0.236964
chr10	32520001	32600000	0.517148	0.577646	0.243998	0.230319
chr10	33720001	33800000	NA	NA	1.53312	1.54186
chr10	33960001	34080000	1.0802	1.85075	NA	NA
chr10	35680001	35760000	0.331593	0.316016	0.459086	0.469661
chr10	36720001	36760000	3.86728	3.96693	3.4631	3.47399
chr10	37560001	37640000	0.263305	0.258313	NA	NA
chr10	38760001	38840000	0.975024	0.999875	0.700256	0.69276
chr10	39560001	39680000	0.683133	0.674883	0.589166	0.543311
chr10	40280001	40320000	0.872299	0.872325	NA	NA
chr10	41400001	41480000	0.913563	0.764965	0.758321	0.676395
chr10	42520001	42600000	1.03533	1.20737	0.633429	0.644089
chr10	43200001	43280000	0.981896	0.9355	1.00708	0.950251
chr10	43880001	43960000	2.08418	2.16228	1.81042	1.73489
chr10	45000001	45120000	0.634036	0.645539	0.584506	0.601517
chr10	45680001	45760000	0.791607	0.938743	0.62912	0.488966
chr10	46880001	47000000	0.360967	0.375167	0.267675	0.203045
chr10	48560001	48640000	NA	NA	0.141218	0.158283
chr10	49520001	49600000	0.376195	0.428079	NA	NA
chr10	50240001	50360000	1.085	1.07154	0.616898	0.582611
chr10	51200001	51280000	1.43126	1.41628	0.968113	0.887883
chr10	52160001	52240000	1.94463	1.74193	1.61608	1.47631
chr10	53360001	53400000	1.57238	1.64734	1.24442	1.34332
chr10	54200001	54360000	0.185674	0.113018	0.108879	0.124701
chr10	54800001	54960000	0.103012	0.106368	0.139684	0.109055
chr10	55760001	55840000	NA	NA	1.38145	1.38628
chr10	55960001	56040000	1.2199	1.15059	NA	NA
chr10	57920001	58000000	0.842839	0.779302	0.597856	0.557847
chr10	58680001	58720000	2.31043	2.21654	2.49441	2.61468
chr10	59520001	59560000	2.27254	2.11324	2.24643	2.31518
chr10	61120001	61240000	0.640735	0.632933	0.659599	0.621988
chr10	61920001	62000000	1.3541	1.3105	1.20053	0.877989
chr10	62840001	62920000	1.79515	1.8774	1.44214	1.32917
chr10	63560001	63640000	0.677856	0.813785	0.582451	0.570567
chr10	64240001	64280000	0.347482	0.435333	NA	NA
chr10	65160001	65240000	0.690324	0.671007	0.5157	0.500785
chr10	66280001	66360000	2.04528	2.1152	2.35899	2.29047
chr10	67520001	67560000	1.36476	1.36124	1.15765	1.19718
chr10	68840001	68880000	1.40533	1.28801	1.01048	0.959082
chr10	69520001	69600000	0.556773	0.555796	0.409881	0.37593
chr10	70800001	70880000	3.06134	2.98479	2.91027	2.79157
chr10	71920001	71960000	NA	NA	0.219023	0.260742
chr10	72560001	72680000	0.326686	0.26688	0.449514	0.448387
chr10	74600001	74720000	1.0886	1.09423	1.34803	1.23812
chr10	75760001	75840000	0.433694	0.359569	NA	NA
chr10	76200001	76240000	NA	NA	0.463996	0.28473
chr10	76960001	77040000	0.406442	0.371912	0.534573	0.331041
chr10	77960001	78040000	1.70973	1.71	1.34887	1.42352
chr10	79120001	79160000	2.75356	2.75881	3.77222	3.44998
chr10	80960001	81040000	3.11227	5.94012	4.65923	5.43203
chr10	82120001	82280000	0.961924	1.03132	0.93055	0.664708
chr10	83200001	83240000	1.33217	1.29313	1.23476	1.24364
chr10	84040001	84080000	1.57322	1.41718	1.25807	1.22714
chr10	84600001	84680000	1.35222	1.39206	0.630663	0.674498
chr10	85320001	85400000	2.09629	2.19667	1.36053	1.37243
chr10	86200001	86320000	1.20226	1.2167	1.18891	1.25041
chr10	87000001	87080000	1.85224	1.96529	1.35762	1.30294
chr10	87840001	87960000	1.71477	1.71891	1.18239	1.17248
chr10	88720001	88800000	0.729266	0.614293	0.535603	0.404567
chr10	89360001	89400000	1.77291	1.69672	1.37988	1.18619
chr10	90320001	90360000	NA	NA	0.807509	0.817846
chr10	90680001	90800000	1.1433	1.03526	0.789179	0.851881
chr10	92480001	92560000	1.77292	1.76726	1.52989	1.40099
chr10	93400001	93480000	0.76208	0.883541	NA	NA
chr10	93560001	93640000	NA	NA	0.926816	1.00964
chr10	94920001	94960000	0.362238	0.312426	0.535875	0.545224
chr10	95520001	95560000	1.71418	1.56536	1.16253	1.28787
chr10	96800001	96880000	1.44625	1.49904	1.27371	1.21186
chr10	98560001	98600000	1.46643	1.33776	1.32094	1.28432
chr10	99000001	99080000	0.643202	0.654144	NA	NA
chr10	100000001	100080000	2.84816	2.98844	2.37208	2.40527
chr10	100840001	101000000	0.317272	0.264249	0.298849	0.299538
chr10	101880001	101960000	0.821095	0.894836	0.913121	0.827669
chr10	102480001	102520000	0.763818	0.978234	0.465359	0.377311
chr10	104160001	104280000	0.304306	0.276623	0.381514	0.359122
chr10	105200001	105280000	1.82973	1.63997	1.52176	1.47111
chr10	105960001	106040000	0.892829	0.996165	0.881879	0.977727
chr10	107240001	107280000	1.16274	1.24024	0.704644	0.640691
chr10	107920001	108000000	0.8052	0.881369	0.697106	0.606459
chr10	109280001	109400000	1.49854	1.49698	1.41145	1.32883
chr10	110560001	110680000	1.56111	1.48613	0.912761	1.1365
chr10	111480001	111520000	2.30205	2.34422	1.39424	1.28707
chr10	112280001	112320000	0.914281	1.01147	0.709339	0.716594
chr10	113400001	113480000	NA	NA	0.11216	0.139558
chr10	114560001	114680000	3.1194	2.9715	2.40659	2.28003
chr10	115680001	115760000	0.917413	0.86654	0.905295	0.93415
chr10	116560001	116680000	0.871587	0.932753	0.734038	0.620106
chr10	117240001	117360000	1.30595	1.60897	0.49035	0.565147
chr10	118680001	118880000	0.624746	0.810032	0.625749	0.616701
chr10	119560001	119640000	2.61007	2.53382	2.26328	2.07782
chr10	120360001	120440000	0.920968	0.80681	0.890507	0.764036
chr10	120920001	121040000	1.01082	1.05303	1.04621	1.10915
chr10	122680001	122720000	1.60894	1.60775	1.28288	1.30608
chr10	124240001	124320000	0.553696	0.593719	0.679305	0.649163
chr10	125040001	125120000	0.853317	0.86612	0.616404	0.645691
chr10	126400001	126480000	3.87396	3.84361	3.79602	3.75944
chr10	128320001	128400000	3.18828	3.18053	3.43193	3.33875
chr11	3880001	3960000	0.93314	0.930079	0.530104	0.581756
chr11	4880001	4960000	1.58178	1.65735	1.49583	1.50562
chr11	6440001	6520000	2.14513	2.27922	2.38275	2.28678
chr11	7000001	7120000	0.967933	0.910947	NA	NA
chr11	8280001	8360000	1.64332	1.71392	1.60016	1.55157
chr11	9040001	9120000	1.50417	1.77446	1.18391	1.13677
chr11	11520001	11600000	0.768753	0.77392	0.399941	0.405152
chr11	12440001	12600000	1.50722	1.39873	1.09222	1.12934
chr11	16320001	16360000	2.44365	2.34916	1.90828	1.88121
chr11	17000001	17040000	1.03902	1.12167	1.09411	1.23447
chr11	18360001	18400000	NA	NA	0.169996	0.191788
chr11	19040001	19080000	0.179634	0.227472	NA	NA
chr11	19680001	19800000	2.6096	2.46914	2.22572	2.32196
chr11	20560001	20720000	0.151035	0.203968	0.126718	0.209681
chr11	21320001	21400000	1.43903	1.32675	1.15573	1.28656
chr11	22040001	22200000	0.314955	0.329552	0.422662	0.478657
chr11	23680001	23760000	1.71886	1.77432	1.60772	1.52177
chr11	25080001	25120000	0.268339	0.30148	NA	NA
chr11	26040001	26160000	0.494188	0.538638	0.421984	0.421502
chr11	26920001	27000000	1.98905	1.96929	1.23685	1.11409
chr11	28360001	28440000	0.852285	0.811568	0.748171	0.78643
chr11	29120001	29160000	1.66083	1.65435	1.55818	1.5263
chr11	29840001	29920000	0.614697	0.684128	0.805659	0.785876
chr11	30720001	30760000	1.51373	1.51658	1.19236	1.19667
chr11	32160001	32200000	NA	NA	0.889798	1.07807
chr11	32400001	32440000	1.42348	1.21291	NA	NA
chr11	34000001	34080000	0.765494	0.563071	0.461491	0.336733
chr11	34600001	34640000	0.834612	0.74657	0.733594	0.757739
chr11	35520001	35560000	NA	NA	1.10205	1.01359
chr11	35880001	35960000	0.754483	0.766081	0.752265	0.670123
chr11	36600001	36720000	0.427093	0.436266	0.187277	0.207188
chr11	37520001	37560000	0.396772	0.434421	0.435398	0.495047
chr11	38200001	38280000	NA	NA	0.321775	0.332515
chr11	38360001	38480000	0.157571	0.119185	NA	NA
chr11	39040001	39080000	NA	NA	0.413527	0.378512
chr11	39240001	39280000	0.318955	0.345515	NA	NA
chr11	40520001	40600000	2.03176	2.08633	1.82802	1.90422
chr11	42080001	42160000	0.273321	0.256731	NA	NA
chr11	42440001	42560000	NA	NA	0.120242	0.121938
chr11	43240001	43320000	2.39386	2.43591	1.72607	1.63693
chr11	44280001	44320000	1.96531	1.90391	1.69308	1.76821
chr11	44920001	45080000	0.243002	0.200501	0.224945	0.23459
chr11	45840001	45880000	0.290963	0.560808	0.539478	0.436583
chr11	47440001	47520000	0.535513	0.534065	0.586028	0.543757
chr11	48520001	48600000	2.15368	2.31017	1.59881	1.55116
chr11	49040001	49200000	0.169471	0.161065	0.28925	0.370765
chr11	50200001	50280000	1.19485	1.29392	0.788893	0.840792
chr11	51440001	51480000	4.07527	4.10156	4.45484	4.60662
chr11	52160001	52200000	3.23949	3.50493	3.89985	3.89485
chr11	53080001	53160000	2.87335	2.97112	2.81842	2.88133
chr11	55200001	55280000	1.82142	1.81463	1.39825	1.52603
chr11	55960001	56000000	0.434393	0.496147	0.196643	0.28425
chr11	57360001	57400000	1.64713	1.68212	1.62912	1.57689
chr11	58040001	58080000	1.82431	1.91735	1.18789	1.27828
chr11	58800001	58960000	0.770156	1.0459	0.718292	1.05569
chr11	60240001	60360000	0.542907	0.762253	1.09251	1.02096
chr11	61560001	61640000	1.11832	1.21275	1.47881	1.45788
chr11	62400001	62480000	3.01605	3.06558	3.19393	3.1213
chr11	62960001	63080000	0.701302	0.665978	NA	NA
chr11	64040001	64120000	0.257678	0.306466	0.244617	0.283505
chr11	64760001	64840000	1.67634	1.6495	1.4263	1.47477
chr11	65680001	65800000	1.47252	1.55791	0.954628	1.10659
chr11	66680001	66800000	0.670772	0.497045	0.630699	0.599428
chr11	67600001	67640000	1.24812	1.18703	1.43167	1.28306
chr11	68760001	68840000	2.29326	2.31615	2.65094	2.86273
chr11	69800001	69840000	0.29219	0.253163	NA	NA
chr11	70880001	70920000	2.8348	3.16645	3.30815	3.16124
chr11	71920001	72000000	2.32924	2.2839	2.21823	2.26498
chr11	72920001	73000000	2.96474	2.87133	2.67785	2.59547
chr11	74400001	74480000	2.20899	2.06195	2.31732	2.31567
chr11	75440001	75480000	1.4511	1.52554	1.62911	1.64118
chr11	76360001	76480000	0.542194	0.567428	0.474694	0.324502
chr11	77560001	77640000	NA	NA	0.699329	0.741098
chr11	78200001	78240000	1.01276	1.03509	1.03223	1.18175
chr11	79240001	79320000	0.493903	0.368591	0.259152	0.384873
chr11	80040001	80160000	1.22358	1.21487	1.46692	1.5098
chr11	81480001	81520000	1.03494	0.973739	1.05258	1.03843
chr11	82120001	82160000	NA	NA	0.539977	0.482913
chr11	83160001	83200000	1.9566	2.08689	2.3666	2.23318
chr11	83960001	84040000	1.46443	1.56237	1.20951	1.50429
chr11	84800001	84840000	1.2999	1.33937	1.15202	1.12099
chr11	86240001	86280000	1.07081	1.06685	1.08163	1.05604
chr11	86920001	87000000	1.35835	1.22001	1.35392	1.40449
chr11	87640001	87760000	0.746597	0.89701	0.297234	0.658732
chr11	88840001	88920000	4.80576	4.97634	4.50309	4.65491
chr11	89800001	89880000	0.543338	0.499184	0.448675	0.467086
chr11	90520001	90600000	1.70655	1.61355	1.43377	1.38814
chr11	91960001	92080000	0.39489	0.465358	0.441855	0.460585
chr11	92840001	92960000	0.54251	0.58527	0.644672	0.709253
chr11	93760001	93800000	4.59024	4.66878	5.6373	5.36714
chr11	94400001	94480000	0.270902	0.423184	0.460555	0.344531
chr11	95640001	95680000	0.567985	0.57295	NA	NA
chr11	96880001	96920000	1.36106	1.11325	1.4692	1.55758
chr11	97920001	97960000	NA	NA	0.172546	0.114873
chr11	98520001	98600000	NA	NA	0.335433	0.441761
chr11	98720001	98800000	1.34792	1.3696	NA	NA
chr11	99000001	99040000	NA	NA	1.08094	1.18698
chr11	100200001	100240000	2.78503	3.04352	3.01013	2.99517
chr11	101440001	101480000	0.883592	1.05094	0.987594	0.856098
chr11	103040001	103120000	0.998883	1.03924	1.19134	1.21394
chr11	104080001	104200000	1.14534	1.21053	0.580181	0.525939
chr11	105120001	105200000	1.10712	1.11428	0.834929	0.827629
chr11	105920001	106000000	1.65453	1.67317	1.94286	2.03664
chr11	106960001	107040000	0.598298	0.541407	NA	NA
chr11	107320001	107480000	0.455344	0.683976	NA	NA
chr11	108320001	108360000	1.63221	1.67469	1.61098	1.65768
chr11	109200001	109280000	1.71334	1.70621	1.15525	1.23963
chr11	110240001	110320000	2.40206	2.5323	1.71091	1.63856
chr11	111280001	111400000	1.11131	1.01937	1.0257	0.927253
chr11	112040001	112120000	0.124299	0.130934	NA	NA
chr11	113040001	113080000	0.49166	0.390069	0.714932	0.612117
chr11	113640001	113760000	1.84513	1.82488	1.46288	1.4052
chr11	114480001	114600000	1.58999	1.53675	1.23582	1.07994
chr11	115200001	115280000	1.06818	1.1636	1.59343	1.42731
chr11	118040001	118240000	0.355529	0.327299	0.800312	0.878825
chr11	119000001	119120000	1.43704	1.41823	1.429	1.49859
chr11	120440001	120520000	0.35757	0.868956	0.677437	0.638578
chr11	121080001	121160000	0.299119	0.553771	0.386922	0.506848
chr12	5040001	5120000	2.27653	2.35227	1.93981	1.88606
chr12	6320001	6360000	0.44932	0.515352	NA	NA
chr12	7240001	7400000	0.345072	0.395837	0.506294	0.442122
chr12	7920001	7960000	1.0112	0.979162	NA	NA
chr12	8080001	8120000	NA	NA	0.442159	0.728953
chr12	9000001	9040000	2.64712	2.59788	2.81188	2.83495
chr12	10520001	10600000	1.33442	1.40998	1.48671	1.46727
chr12	11360001	11440000	1.12799	1.30129	0.952705	1.11679
chr12	12200001	12320000	1.1963	1.31018	0.775733	0.666847
chr12	13320001	13360000	2.17936	2.16967	2.1571	1.93956
chr12	15520001	15560000	1.83373	1.76199	1.35202	1.47758
chr12	16600001	16680000	1.70467	1.77323	1.58194	1.60364
chr12	18120001	18200000	1.39682	1.64193	1.59057	1.55263
chr12	20160001	20280000	0.787186	0.598251	0.245943	0.522626
chr12	21040001	21080000	2.09941	2.66772	2.6412	2.36931
chr12	25600001	25680000	1.4414	1.42328	1.5258	1.5547
chr12	26920001	27040000	1.47222	1.51216	1.25398	1.34479
chr12	27800001	27840000	NA	NA	0.610935	0.558785
chr12	27920001	27960000	0.623189	0.687234	NA	NA
chr12	29240001	29280000	2.61551	2.60822	2.62014	2.56023
chr12	29960001	30000000	0.256666	0.371076	NA	NA
chr12	30640001	30720000	0.202939	0.346318	NA	NA
chr12	31200001	31240000	NA	NA	0.582294	0.54306
chr12	31680001	31840000	0.346091	0.324124	0.150805	0.170922
chr12	32680001	32800000	0.738914	0.772663	0.862562	0.774188
chr12	34040001	34120000	1.66583	1.68519	1.77511	1.53043
chr12	35240001	35320000	0.689753	0.699553	0.811935	0.85238
chr12	35880001	35920000	1.41355	1.38188	1.18171	1.30327
chr12	36720001	36800000	1.92435	1.89928	1.18426	1.1412
chr12	37440001	37520000	0.515756	0.519371	NA	NA
chr12	38680001	38800000	0.527683	0.49751	0.478351	1.02113
chr12	40240001	40320000	0.767436	0.79552	0.786446	0.873834
chr12	40880001	40920000	1.75965	1.7306	1.60055	1.47464
chr12	41520001	41560000	1.16802	1.30255	1.21163	1.24737
chr12	43360001	43560000	0.396395	0.45391	0.659269	0.562694
chr12	45200001	45240000	NA	NA	0.378713	0.320869
chr12	45520001	45640000	0.763722	0.795164	0.343212	0.363942
chr12	46440001	46520000	1.64668	1.72054	1.17748	1.25332
chr12	50320001	50440000	3.0141	3.07137	2.06017	2.16296
chr12	51400001	51480000	1.71036	1.74703	0.931062	0.949239
chr12	52520001	52640000	1.23357	1.31737	1.29707	1.2442
chr12	53960001	54000000	2.00437	1.93404	1.8182	1.69624
chr12	55080001	55160000	0.821045	0.787349	0.664825	0.7114
chr12	55880001	55960000	3.19225	3.12451	3.26763	3.31114
chr12	56800001	56840000	1.76879	1.7825	1.90183	1.98192
chr12	57680001	57760000	1.45457	1.46988	1.23021	1.18494
chr12	58240001	58320000	1.02951	1.09621	0.874534	0.995355
chr12	58880001	59000000	1.05598	0.816991	0.622804	0.678987
chr12	60280001	60360000	2.74718	2.78177	2.16427	2.22829
chr12	60960001	61000000	0.485926	0.514491	0.598292	0.572827
chr12	61800001	61920000	0.708535	0.662272	0.603802	0.458756
chr12	62920001	63000000	0.522554	0.481027	NA	NA
chr12	63320001	63400000	NA	NA	0.128971	0.208548
chr12	63920001	64000000	0.29719	0.285999	NA	NA
chr12	64880001	65000000	NA	NA	0.494087	0.606494
chr12	66000001	66080000	3.07975	2.92795	2.37842	2.50104
chr12	67120001	67200000	0.445529	0.466683	0.395224	0.420146
chr12	68440001	68560000	0.431178	0.52922	0.358554	0.445656
chr12	69400001	69440000	NA	NA	0.127819	0.17168
chr12	70280001	70360000	3.73452	3.66931	3.66436	3.61547
chr12	70960001	71080000	0.522083	0.480926	0.522056	0.553727
chr12	72200001	72280000	3.03377	2.74049	2.98327	2.96698
chr12	72840001	72920000	NA	NA	0.168328	0.152802
chr12	73880001	73960000	0.858507	0.925824	0.903446	0.875792
chr12	74640001	74720000	1.12435	1.13967	1.16934	1.27311
chr12	75320001	75400000	0.858117	0.804415	0.836175	0.908978
chr12	76560001	76640000	1.70562	1.55617	1.06302	1.02738
chr12	77360001	77440000	0.52005	0.444279	0.201558	0.233701
chr12	77960001	78000000	1.40227	1.30254	1.24172	1.13556
chr12	79240001	79320000	1.04635	0.92892	1.25428	1.37311
chr12	80240001	80320000	2.07188	2.10309	2.031	2.26168
chr12	81960001	82040000	1.38799	1.46682	1.77306	1.8755
chr12	82920001	83000000	1.19459	1.12113	1.07337	1.11602
chr12	83640001	83760000	0.428916	0.303456	0.434016	0.391915
chr12	85680001	85760000	0.980943	0.974483	1.04237	1.05449
chr12	86400001	86480000	0.595843	0.49059	0.385175	0.445086
chr12	87080001	87160000	0.293607	0.382586	0.205539	0.393497
chr12	88680001	88760000	2.1643	2.51843	1.8257	1.98733
chr12	89560001	89680000	2.25076	2.13672	1.59423	1.61459
chr12	90640001	90680000	2.38105	2.24162	2.31701	2.29723
chr12	91760001	91800000	1.01898	0.977857	0.80297	0.932592
chr12	93120001	93160000	1.34342	1.26319	1.34444	1.32291
chr12	94600001	94720000	0.446894	0.387575	0.26469	0.169183
chr12	95880001	96000000	0.218529	0.220079	NA	NA
chr12	97040001	97160000	1.24388	1.24464	0.809074	0.780045
chr12	98600001	98680000	1.05211	1.12324	0.675999	0.637304
chr12	99800001	100000000	1.36378	1.31882	1.05758	1.08581
chr12	101280001	101360000	1.5908	1.63705	1.77486	1.61187
chr12	102280001	102360000	2.69926	2.72692	2.40346	2.35134
chr12	103120001	103200000	1.63492	1.6003	1.7594	1.58023
chr12	104040001	104080000	1.17955	1.07433	0.796417	0.81703
chr12	104640001	104720000	0.601009	0.602705	NA	NA
chr12	105760001	105840000	0.443094	0.407901	0.701308	0.555892
chr12	106400001	106520000	0.607529	0.585759	0.397207	0.44244
chr12	106640001	106840000	NA	NA	0.140891	0.226108
chr12	107320001	107440000	0.863988	1.02717	0.969324	0.857855
chr12	109360001	109440000	2.46644	2.70825	1.684	1.57064
chr12	110000001	110080000	1.63541	1.77287	1.47268	1.50937
chr12	111680001	111800000	0.932854	0.935612	1.41273	1.40866
chr12	113040001	113080000	1.80633	1.69877	2.25559	2.13264
chr12	113840001	113920000	2.1013	2.08777	2.69046	2.29106
chr12	114400001	114440000	3.14706	3.16988	3.03382	2.9753
chr12	115560001	115640000	0.900805	0.825986	0.792656	0.720324
chr12	116320001	116400000	0.397212	0.396791	0.318071	0.458526
chr12	117240001	117320000	1.59303	1.69067	1.10584	1.11258
chr12	117880001	117960000	1.24123	1.15436	0.877086	0.778673
chr12	118520001	118640000	0.83489	0.858005	0.265335	0.37479
chr12	119080001	119120000	0.905667	0.792594	0.88958	0.930309
chr12	120120001	120200000	1.57355	1.7279	1.81339	1.81627
chr13	4600001	4680000	1.61697	1.44419	1.76073	1.74659
chr13	5800001	5880000	0.611127	0.657397	0.680834	0.647817
chr13	6600001	6640000	4.46677	4.2129	2.81438	3.015
chr13	8800001	8880000	2.8718	2.85571	2.36489	2.32624
chr13	9840001	9880000	2.3274	2.39427	2.02711	2.17197
chr13	10560001	10640000	0.370414	0.39184	0.495025	0.62342
chr13	11600001	11760000	0.647255	0.628036	0.839823	0.78051
chr13	12520001	12640000	1.57224	1.55586	2.07618	2.03571
chr13	13680001	13760000	1.17518	1.1698	1.44873	1.47479
chr13	14720001	14800000	2.008	1.98851	1.38914	1.49001
chr13	15960001	16040000	2.28481	2.24948	1.41304	1.49945
chr13	16960001	17000000	1.32366	1.31303	1.34685	1.30429
chr13	17840001	17920000	2.67584	2.69744	2.3288	2.33381
chr13	19080001	19160000	0.906217	0.907668	0.995308	0.907906
chr13	19720001	19800000	NA	NA	0.236722	0.227746
chr13	20400001	20480000	0.977834	1.15164	0.673803	0.669495
chr13	21320001	21400000	0.764893	0.727941	0.688071	0.677951
chr13	22200001	22240000	1.50054	1.38195	1.24479	1.04441
chr13	23600001	23680000	3.51931	3.52516	3.16271	3.14842
chr13	25120001	25320000	0.968347	0.868269	1.20557	1.09016
chr13	26760001	26840000	NA	NA	0.302625	0.155561
chr13	28440001	28600000	0.219078	0.154026	0.292862	0.2891
chr13	29000001	29080000	1.19116	1.26872	0.696242	0.733712
chr13	29960001	30040000	1.47363	1.32933	1.60323	1.68749
chr13	31000001	31080000	1.03977	1.06907	1.00183	0.987696
chr13	31800001	31840000	2.85029	2.82787	2.4515	2.51638
chr13	32880001	32920000	2.99166	2.90898	2.69359	2.70945
chr13	34080001	34120000	2.96645	3.00687	3.00262	2.88957
chr13	35000001	35040000	2.20661	2.18318	2.38389	2.30413
chr13	36080001	36120000	1.95781	1.94328	1.77886	1.78732
chr13	37520001	37560000	2.06797	1.92727	1.72414	1.60452
chr13	38160001	38200000	0.777856	0.708367	0.977956	0.941143
chr13	38760001	38800000	1.51744	1.42651	1.05132	1.05535
chr13	39440001	39480000	NA	NA	0.210623	0.284663
chr13	40880001	40960000	1.37838	1.45377	1.13032	1.17143
chr13	41560001	41600000	0.820267	0.74941	NA	NA
chr13	41680001	41720000	NA	NA	1.02632	0.981162
chr13	43000001	43120000	0.582458	0.581625	0.889047	0.926032
chr13	43760001	43840000	1.44963	1.32541	1.14476	1.15064
chr13	45080001	45200000	0.651702	0.626916	0.330081	0.335069
chr13	45600001	45680000	1.20332	1.21176	0.92585	0.913802
chr13	46320001	46400000	0.870367	0.900546	0.674323	0.711337
chr13	47280001	47360000	1.05546	1.01295	0.780853	0.638259
chr13	48600001	48680000	1.91668	2.0457	1.94964	2.18221
chr13	49800001	49880000	1.73642	1.58971	1.48183	1.5795
chr13	50920001	51000000	1.52798	1.51273	1.42708	1.52941
chr13	51800001	51840000	2.52371	2.58979	1.9327	1.98004
chr13	52640001	52720000	0.381244	0.44257	0.477827	0.379521
chr13	53280001	53360000	0.577016	0.593478	0.617499	0.478896
chr13	54680001	54800000	0.705569	0.627457	0.688462	0.585807
chr13	55800001	55840000	2.58937	2.71674	2.7426	2.67446
chr13	58040001	58080000	1.35429	1.16774	1.45493	1.4202
chr13	58680001	58720000	1.03133	1.05589	0.951414	0.913098
chr13	59720001	59840000	2.33396	2.3432	2.00205	1.91917
chr13	60680001	60720000	NA	NA	0.710513	0.719074
chr13	61080001	61120000	0.851319	0.869748	NA	NA
chr13	62880001	63000000	0.875329	0.765651	0.840744	0.813797
chr13	63480001	63560000	1.15121	1.17807	1.051	1.06517
chr13	64400001	64480000	2.80088	2.79391	1.43625	1.50995
chr13	65440001	65560000	1.45455	1.59598	1.2317	1.39397
chr13	67000001	67040000	2.4181	2.34102	2.56694	2.49349
chr13	67880001	68000000	0.901944	0.979903	0.954836	0.800229
chr13	68720001	68840000	1.1453	1.33212	1.41782	1.25933
chr13	69800001	69880000	1.25449	1.29671	1.11944	1.05419
chr13	71080001	71120000	NA	NA	0.637719	0.620675
chr13	71200001	71240000	1.29085	1.34365	NA	NA
chr13	72640001	72720000	NA	NA	0.157288	0.226667
chr13	73640001	73720000	0.943575	0.997323	0.649492	0.728026
chr13	74440001	74560000	0.5282	0.544542	0.694207	0.78402
chr13	76200001	76360000	2.0906	2.0815	1.01293	1.23124
chr13	76840001	76880000	NA	NA	0.978129	0.862897
chr13	78200001	78360000	0.715232	0.705572	0.9255	0.894412
chr13	79360001	79440000	0.81885	0.835622	0.788445	0.810284
chr13	80920001	80960000	1.8353	1.80512	1.69019	1.59822
chr13	82000001	82080000	0.60925	0.705773	0.51758	0.601738
chr13	82600001	82680000	0.436067	0.457584	0.294497	0.294779
chr13	83760001	83840000	1.85479	1.79479	0.99601	1.05598
chr13	85200001	85320000	1.19092	1.14672	1.11141	1.10215
chr13	86600001	86720000	0.6015	0.685951	0.788272	0.745995
chr13	87560001	87640000	0.571759	0.643089	0.745121	0.82749
chr13	89760001	89800000	3.10141	2.92757	2.23065	2.16247
chr13	91040001	91080000	3.48063	3.42187	3.32955	3.26659
chr13	94480001	94560000	1.27059	1.34235	1.19409	1.08635
chr13	95200001	95280000	1.54702	1.56252	1.15322	1.15074
chr13	96240001	96360000	0.529588	0.52281	0.208772	0.126572
chr13	97200001	97280000	1.68872	1.69759	1.57065	1.3834
chr13	97920001	97960000	2.81007	2.79025	2.48614	2.39412
chr13	98880001	98960000	1.423	1.50399	1.33305	1.38608
chr13	99480001	99600000	0.487739	0.621292	0.42459	0.470324
chr13	100000001	100120000	1.00235	1.0922	1.24939	1.10042
chr13	100760001	100880000	0.774654	0.762126	0.694969	0.66228
chr13	101560001	101640000	2.86392	2.91304	2.02902	2.06918
chr13	102440001	102480000	2.26068	2.23142	1.4519	1.39124
chr13	103560001	103600000	2.10016	2.15709	1.66835	1.6272
chr13	104520001	104560000	2.90771	2.81219	2.13198	2.20912
chr13	105640001	105680000	1.08591	1.03817	1.07506	0.927262
chr13	106280001	106400000	0.790947	0.787215	0.535979	0.510654
chr13	107560001	107640000	NA	NA	0.399655	1.00531
chr13	107800001	107840000	1.53832	1.40761	NA	NA
chr13	109000001	109040000	2.22795	2.2844	2.07483	2.11599
chr13	110040001	110160000	1.05625	0.973929	1.02914	1.05195
chr13	111120001	111160000	2.23478	2.20715	2.2439	2.23017
chr13	112280001	112320000	1.38784	1.49237	1.55131	1.51789
chr13	113800001	113880000	0.926305	1.03166	0.999319	1.02314
chr13	114560001	114640000	0.818857	0.730165	0.653776	0.628773
chr13	115760001	115880000	1.79843	1.70459	1.22416	1.15606
chr13	117480001	117560000	1.4098	1.31064	1.15085	1.1804
chr13	118120001	118200000	NA	NA	0.977036	0.959176
chr13	119200001	119240000	1.72187	1.68669	1.62802	1.53767
chr14	7360001	7480000	0.346826	0.359006	NA	NA
chr14	8480001	8560000	2.75937	5.4052	2.97164	2.61009
chr14	10200001	10280000	0.78873	0.778234	0.475818	0.499966
chr14	11000001	11080000	0.267362	0.197169	0.124654	0.22149
chr14	12040001	12120000	NA	NA	0.523286	0.536349
chr14	12200001	12240000	0.986327	1.0735	NA	NA
chr14	13120001	13200000	1.60538	1.62552	1.97136	2.05417
chr14	14120001	14200000	1.77646	1.73752	1.37944	1.35177
chr14	14960001	15000000	1.09709	1.23666	1.08604	1.01351
chr14	15840001	15880000	1.54089	1.55373	1.18618	1.31562
chr14	17160001	17200000	2.27013	2.30664	1.27019	1.33909
chr14	18200001	18280000	1.33691	1.36492	1.32208	1.38745
chr14	19040001	19120000	2.42931	2.40199	1.88413	1.93977
chr14	20240001	20320000	5.78248	5.62995	6.06412	4.2911
chr14	21160001	21200000	1.52414	1.31947	1.44265	1.55564
chr14	22640001	22680000	3.26415	3.46176	3.45945	3.25342
chr14	23760001	23840000	0.356598	0.349121	NA	NA
chr14	24320001	24440000	0.635345	0.443328	0.441435	0.514815
chr14	25240001	25320000	1.17032	0.970388	1.36619	1.33201
chr14	28400001	28480000	1.65745	1.52158	1.76903	1.7096
chr14	30640001	30760000	0.2736	0.345558	0.294089	0.200927
chr14	31440001	31520000	1.90459	1.7795	1.15185	1.29376
chr14	33120001	33200000	1.51629	1.58813	1.61296	1.69804
chr14	33920001	34040000	0.181762	0.281618	NA	NA
chr14	34920001	35000000	1.35909	1.38401	1.2282	1.09591
chr14	35600001	35680000	2.21211	2.3571	1.86831	1.78055
chr14	36880001	37000000	0.155451	0.23502	NA	NA
chr14	37880001	37960000	1.66716	1.60696	1.32454	1.20225
chr14	39000001	39120000	0.306255	0.38346	NA	NA
chr14	40240001	40280000	0.866698	0.77852	NA	NA
chr14	41120001	41200000	0.396974	0.345888	0.37977	0.403274
chr14	41960001	42040000	2.27933	2.18577	1.63351	1.58082
chr14	43280001	43320000	0.133352	0.430913	NA	NA
chr14	43720001	43760000	0.307217	0.288627	NA	NA
chr14	44160001	44240000	0.439219	0.405138	0.305137	0.33958
chr14	47400001	47480000	1.9433	1.97911	2.46347	2.36574
chr14	48160001	48240000	2.04419	2.12474	2.33125	2.54432
chr14	49040001	49120000	1.33762	1.29489	0.849179	0.821131
chr14	49760001	49840000	0.751306	0.726316	0.651425	0.552241
chr14	50400001	50560000	0.434613	0.638066	0.420656	0.385709
chr14	51280001	51400000	0.839421	0.905111	0.83836	0.99081
chr14	51840001	51880000	0.264623	0.445834	NA	NA
chr14	52400001	52480000	1.30953	1.59729	1.21604	1.15966
chr14	54440001	54560000	1.94052	2.1153	1.65959	1.70137
chr14	55320001	55400000	1.35589	1.20858	1.0123	1.04121
chr14	56240001	56320000	1.19848	1.1576	0.668682	0.743519
chr14	57040001	57120000	0.282984	0.291501	0.564635	0.662826
chr14	57440001	57600000	0.494612	0.432262	0.22038	0.222525
chr14	58520001	58600000	1.79686	2.10037	1.43787	1.42062
chr14	59760001	59840000	0.973092	1.09721	0.624628	0.711244
chr14	60200001	60240000	NA	NA	0.26431	0.292921
chr14	60800001	60840000	0.380713	0.429571	NA	NA
chr14	61320001	61400000	NA	NA	0.221678	0.111404
chr14	62040001	62120000	1.44068	1.4665	1.07854	1.03126
chr14	63080001	63240000	0.597367	0.753071	0.734003	0.697383
chr14	63640001	63760000	0.169479	0.330247	NA	NA
chr14	64480001	64640000	0.621848	0.667202	0.567814	0.41988
chr14	65360001	65560000	0.875413	0.309506	0.361821	0.328577
chr14	66840001	66920000	0.925828	0.956001	0.732423	0.708892
chr14	67600001	67680000	1.55747	1.46182	0.889564	0.983627
chr14	68680001	68720000	0.387567	0.466753	NA	NA
chr14	68800001	68880000	NA	NA	0.588318	0.316383
chr14	69160001	69240000	0.238162	0.295396	NA	NA
chr14	69960001	70040000	1.47096	1.67314	1.60729	1.5412
chr14	71080001	71120000	3.2861	3.39175	3.16355	2.96929
chr14	71760001	71880000	0.521646	0.553329	0.559814	0.518761
chr14	72720001	72800000	1.585	1.50486	1.17633	1.2035
chr14	73760001	73920000	2.40249	2.39463	1.7875	1.86588
chr14	75360001	75440000	2.35751	2.26053	1.48019	1.48899
chr14	76120001	76160000	1.26891	1.1646	0.994435	0.993324
chr14	76800001	76840000	0.626336	0.663437	0.703388	0.772526
chr14	77480001	77520000	4.01249	4.02802	3.38057	3.2135
chr14	78920001	79000000	1.11832	1.07656	0.791815	0.753439
chr14	79840001	79920000	1.39568	1.47604	1.24328	1.23771
chr14	80640001	80720000	1.61835	1.64426	1.47794	1.41934
chr14	81400001	81520000	0.730075	0.68204	0.441149	0.474932
chr14	82200001	82280000	0.202163	0.243909	0.411015	0.36967
chr14	82880001	82960000	0.333096	0.360708	0.221604	0.21978
chr14	83720001	83760000	0.189433	0.194082	0.220753	0.321473
chr14	84680001	84760000	1.6279	1.69498	1.75822	1.80921
chr14	86000001	86160000	0.365135	0.284872	0.119463	0.442562
chr14	86960001	87080000	0.520186	0.538505	0.54026	0.631012
chr14	87880001	88000000	1.06971	1.22428	1.01283	0.972517
chr14	89400001	89480000	1.22728	1.22392	0.640026	0.690877
chr14	90760001	90800000	0.330608	0.291792	NA	NA
chr14	91320001	91400000	0.398065	0.482962	0.328978	0.267402
chr14	92960001	93040000	0.358676	0.431523	0.564911	0.63763
chr14	93680001	93760000	0.492867	0.413055	0.213225	0.354144
chr14	94360001	94440000	2.44464	2.45157	1.79159	1.97868
chr14	96280001	96360000	1.48155	1.42239	0.905545	0.83543
chr14	97360001	97400000	1.72694	1.68538	1.54821	1.52719
chr14	97920001	97960000	0.314009	0.354285	NA	NA
chr14	98680001	98720000	1.0713	1.09584	0.982857	0.956744
chr14	99480001	99520000	4.41591	4.57695	3.79724	3.73085
chr14	100320001	100360000	3.12629	3.31263	2.76665	2.80562
chr14	101000001	101040000	0.269118	0.306251	0.269562	0.268766
chr14	101960001	102040000	1.79624	1.74955	1.57301	1.62019
chr14	103400001	103440000	1.98553	2.14425	1.75777	1.65009
chr14	104000001	104080000	0.827749	0.809468	0.998647	1.00806
chr14	105520001	105560000	2.14463	2.06402	1.50928	1.49178
chr14	106840001	106920000	1.10462	1.0774	0.909234	0.967015
chr14	108120001	108280000	0.153759	0.14818	0.310262	0.389545
chr14	110160001	110240000	1.70953	1.68347	1.38598	1.46609
chr14	111320001	111360000	2.04545	2.15684	1.75519	1.75146
chr14	112200001	112320000	0.866153	0.926695	0.702631	0.71722
chr14	113400001	113440000	0.881535	0.90902	NA	NA
chr14	113560001	113600000	NA	NA	0.477774	0.458248
chr14	115280001	115360000	1.38528	1.24824	0.707216	0.839069
chr14	115960001	116040000	0.44684	0.471003	0.521499	0.538085
chr14	117240001	117280000	0.654252	0.674402	0.583995	0.642551
chr14	118440001	118480000	1.75766	1.76836	1.34761	1.17566
chr14	119440001	119480000	2.02607	2.06958	1.83867	1.79583
chr14	120360001	120440000	1.73399	1.74961	1.68085	1.83873
chr14	121280001	121360000	1.9411	1.68822	1.75257	1.62348
chr14	121920001	122040000	NA	NA	0.136088	0.240934
chr14	122360001	122480000	0.963524	0.994464	0.921982	1.00598
chr14	123320001	123360000	NA	NA	1.15061	1.18361
chr14	123720001	123840000	1.48821	1.46525	0.742224	0.718523
chr15	3960001	4040000	2.71898	2.58863	1.483	1.42454
chr15	5000001	5080000	3.65089	3.57825	2.45198	2.37899
chr15	6640001	6720000	1.45595	1.36644	1.14408	1.08263
chr15	7400001	7480000	0.274592	0.218779	0.197921	0.322952
chr15	8000001	8080000	1.00095	0.889773	0.484267	0.618187
chr15	8360001	8440000	1.07402	1.18473	0.959535	0.958774
chr15	9080001	9120000	NA	NA	0.314293	0.355918
chr15	9200001	9240000	0.523365	0.506717	NA	NA
chr15	10280001	10400000	1.23719	1.15406	0.923366	0.904793
chr15	11320001	11360000	1.08791	1.16164	0.813012	0.771816
chr15	12080001	12200000	0.888643	0.78534	0.588603	0.59966
chr15	12840001	12880000	2.53198	2.60703	2.79902	2.94694
chr15	14080001	14120000	1.42476	1.44897	NA	NA
chr15	14280001	14360000	NA	NA	0.732128	0.660901
chr15	15160001	15200000	1.8438	1.76908	1.48448	1.37689
chr15	16040001	16120000	1.01883	0.906382	0.391495	0.366933
chr15	17040001	17120000	1.9331	1.8183	0.917534	0.917429
chr15	18960001	19040000	0.698755	0.670607	0.460215	0.44868
chr15	20240001	20360000	0.770917	0.786057	0.66131	0.591651
chr15	21440001	21520000	1.8948	1.87171	1.71252	1.73812
chr15	22240001	22280000	0.429418	0.351335	NA	NA
chr15	23040001	23120000	NA	NA	0.389944	0.400925
chr15	23280001	23320000	0.367736	0.330081	NA	NA
chr15	24440001	24520000	2.16526	2.18253	1.96998	1.96921
chr15	25840001	25920000	1.49034	1.43518	0.897673	0.876729
chr15	27160001	27240000	1.53201	1.37438	1.12503	1.18807
chr15	28120001	28200000	0.956249	1.05825	0.833185	0.810855
chr15	28960001	29000000	0.160366	0.127798	NA	NA
chr15	29640001	29720000	NA	NA	0.285695	0.358989
chr15	29840001	29920000	0.337253	0.243985	NA	NA
chr15	30680001	30760000	0.228311	0.21598	NA	NA
chr15	31560001	31600000	1.11281	0.984815	0.797341	0.775467
chr15	32680001	32760000	2.30664	2.31864	1.30999	1.31233
chr15	34400001	34480000	2.00469	2.0033	1.38261	1.40511
chr15	35320001	35400000	0.313884	0.225538	NA	NA
chr15	35960001	36000000	NA	NA	0.584868	0.47568
chr15	36080001	36160000	0.522183	0.506386	NA	NA
chr15	36520001	36600000	0.579397	0.656121	0.532206	0.456623
chr15	37040001	37080000	NA	NA	0.536783	0.58131
chr15	37960001	38000000	NA	NA	0.865607	0.700382
chr15	38080001	38160000	0.763493	0.720074	NA	NA
chr15	38520001	38600000	0.799919	0.663521	0.483549	0.395982
chr15	38960001	39160000	0.484009	0.616269	0.78683	0.862757
chr15	39920001	40000000	1.63091	1.63123	1.30163	1.20985
chr15	40960001	41040000	2.64947	2.58615	2.53758	2.58695
chr15	41720001	41800000	2.27321	2.28917	1.93411	2.07628
chr15	42720001	42800000	2.27844	2.22923	1.79786	1.83906
chr15	43640001	43720000	1.21703	1.25353	1.13019	1.05882
chr15	44720001	44760000	0.568683	0.627986	0.877437	0.978386
chr15	46360001	46440000	0.195278	0.230179	0.156389	0.179763
chr15	47800001	47840000	0.299523	0.37431	NA	NA
chr15	48600001	48640000	0.872651	0.794885	0.371171	0.343911
chr15	49240001	49440000	0.323126	0.421748	0.402867	0.370632
chr15	50080001	50120000	0.231215	0.205329	NA	NA
chr15	50240001	50320000	NA	NA	0.380959	0.426219
chr15	51600001	51680000	0.783371	0.769742	NA	NA
chr15	52360001	52480000	1.35574	1.41905	1.33118	1.31727
chr15	53600001	53680000	1.74143	1.69233	1.38639	1.41482
chr15	54840001	54880000	0.613453	0.746328	0.993811	0.943169
chr15	55240001	55320000	0.19247	0.255968	NA	NA
chr15	55680001	55760000	0.46896	0.478746	0.637219	0.615009
chr15	57440001	57480000	NA	NA	1.40903	1.30136
chr15	57840001	57960000	1.0149	1.00595	0.634116	0.692029
chr15	58760001	58800000	0.408864	0.476425	0.40497	0.446937
chr15	59200001	59320000	NA	NA	0.220017	0.16737
chr15	60920001	61000000	1.96228	1.94369	2.46263	2.53884
chr15	61840001	61920000	1.77747	1.80009	1.70044	1.78056
chr15	62640001	62680000	0.477418	0.561528	NA	NA
chr15	63760001	63840000	2.06091	2.06909	1.93155	1.97601
chr15	64480001	64560000	1.0639	1.06885	0.769528	0.776074
chr15	65680001	65800000	1.49161	1.54756	1.3902	1.34628
chr15	66400001	66440000	2.05083	2.06953	1.45137	1.25032
chr15	66960001	67000000	0.504494	0.487161	NA	NA
chr15	67080001	67120000	NA	NA	0.504657	0.499509
chr15	68240001	68320000	1.30719	1.19316	NA	NA
chr15	68640001	68720000	1.23951	1.27539	1.52001	1.5292
chr15	69560001	69680000	0.707127	0.845265	0.689721	0.637388
chr15	71160001	71200000	0.495258	0.43807	0.430337	0.545536
chr15	72880001	72960000	1.23092	1.14394	1.31666	1.20066
chr15	73480001	73560000	2.54671	2.57516	2.03422	2.08284
chr15	74560001	74640000	1.87932	1.93933	1.71394	1.80608
chr15	75640001	75720000	1.52687	1.48741	2.10639	2.05527
chr15	76440001	76600000	0.403936	0.434665	0.686476	0.625559
chr15	77280001	77320000	NA	NA	0.724481	0.724588
chr15	77920001	78040000	0.36737	0.442749	0.245698	0.27627
chr15	78720001	78840000	1.76205	1.61301	1.46167	1.37092
chr15	79680001	79760000	NA	NA	0.522765	0.549608
chr15	79920001	80000000	1.53025	1.11381	0.429321	0.461457
chr15	80680001	80800000	1.01409	0.995005	1.25553	1.26065
chr15	81880001	81960000	1.81869	1.9251	1.78066	1.84017
chr15	82920001	83000000	NA	NA	0.244381	0.232666
chr15	83440001	83560000	1.47808	1.35938	1.11765	1.15275
chr15	84720001	84760000	1.08542	1.04095	NA	NA
chr15	85080001	85120000	NA	NA	0.702917	0.68216
chr15	86080001	86160000	2.31226	2.32185	1.8291	1.9689
chr15	87080001	87200000	0.53413	0.596177	0.536006	0.54717
chr15	88520001	88560000	3.20831	3.32737	2.34735	2.28896
chr15	89320001	89360000	2.89524	2.78565	2.16502	2.14333
chr15	90000001	90040000	1.62136	1.50822	1.38497	1.32594
chr15	90760001	90840000	0.528995	0.466893	0.524241	0.486261
chr15	91920001	92040000	0.697138	0.641548	0.661329	0.711702
chr15	93000001	93080000	0.92518	1.21654	0.88452	0.958919
chr15	94400001	94480000	1.79352	1.85481	1.75784	1.85172
chr15	95520001	95560000	3.24193	3.2335	2.79318	2.75598
chr15	96320001	96360000	2.87676	2.97785	2.22718	2.31207
chr15	97520001	97560000	0.922806	0.976953	NA	NA
chr15	97640001	97680000	NA	NA	0.419574	0.47742
chr15	98440001	98480000	2.42619	2.40057	2.74256	2.96767
chr15	100240001	100320000	0.538462	0.419631	0.724144	0.610646
chr15	100920001	101040000	1.12543	1.17254	0.586479	0.551043
chr15	101920001	102000000	2.21244	2.32177	2.35179	2.44395
chr15	102400001	102480000	1.75546	1.57532	2.34756	2.15314
chr16	3880001	3920000	NA	NA	0.926722	1.07975
chr16	5160001	5280000	2.46981	2.36335	3.31215	3.13931
chr16	6520001	6560000	1.66878	1.73182	1.50793	1.47941
chr16	7240001	7280000	NA	NA	0.209579	0.241824
chr16	8400001	8480000	1.02947	1.02186	1.37769	1.27433
chr16	10440001	10520000	2.00547	2.23325	2.0579	1.91983
chr16	11320001	11360000	1.18983	1.21199	0.985518	1.04584
chr16	12240001	12320000	0.698751	0.745727	0.500855	0.425358
chr16	13080001	13160000	1.90533	1.91649	1.92462	2.02772
chr16	13720001	13840000	0.659714	0.726965	0.706838	0.708661
chr16	14560001	14600000	1.60348	1.63721	1.61159	1.47042
chr16	15720001	15800000	1.00342	1.00186	1.04716	1.00385
chr16	16240001	16280000	0.745056	0.667126	0.392661	0.546351
chr16	17040001	17080000	1.45229	1.51028	1.57078	1.60143
chr16	18240001	18320000	0.327133	0.360036	0.492093	0.4897
chr16	18920001	19080000	1.53836	1.60876	1.33917	1.26029
chr16	20160001	20280000	0.554125	0.516934	0.500296	0.709469
chr16	20720001	20760000	1.60646	1.64237	1.4946	1.50046
chr16	21680001	21720000	NA	NA	0.514623	0.735238
chr16	22160001	22200000	0.637764	0.564306	NA	NA
chr16	23000001	23040000	1.10553	1.10416	1.1332	0.979725
chr16	23960001	24040000	2.96299	2.93263	2.89991	2.85407
chr16	25240001	25320000	0.934832	1.02405	1.09936	0.929268
chr16	25960001	26040000	0.552402	0.68319	0.683635	0.66393
chr16	27480001	27600000	0.522268	0.486979	0.711708	0.777175
chr16	28560001	28600000	2.33125	2.25434	1.94499	1.92076
chr16	29600001	29640000	5.08327	4.81475	4.29997	4.40374
chr16	30440001	30480000	1.77228	1.73668	1.2604	1.21506
chr16	31320001	31400000	0.488524	0.570568	0.567286	0.561674
chr16	31920001	31960000	1.37431	1.2527	1.28014	1.37418
chr16	33160001	33240000	0.884877	0.796352	1.1513	1.11457
chr16	34000001	34120000	0.645687	0.845181	0.926355	0.790537
chr16	35000001	35040000	1.51825	1.40834	1.54317	1.57423
chr16	35920001	36000000	1.88475	1.93294	1.35551	1.19077
chr16	36960001	37040000	1.49046	1.48706	1.54832	1.38217
chr16	37720001	37880000	0.766375	0.633392	0.655985	0.584453
chr16	38480001	38520000	1.12039	1.05427	0.911773	0.864598
chr16	39120001	39160000	0.903312	0.941234	0.656188	0.717044
chr16	40440001	40520000	0.781479	0.71702	0.257156	0.292089
chr16	41120001	41240000	0.744403	0.697792	0.794513	0.753404
chr16	42120001	42160000	1.4885	1.53418	1.56616	1.54224
chr16	42840001	42920000	1.29283	1.49259	1.43516	1.44507
chr16	44120001	44200000	1.11182	1.05847	1.01233	0.933183
chr16	45120001	45200000	0.467044	0.521459	0.282693	0.158072
chr16	46000001	46080000	0.366196	0.808112	NA	NA
chr16	46160001	46240000	NA	NA	0.917614	0.911583
chr16	47840001	48000000	0.409639	0.343586	0.276123	0.227838
chr16	49000001	49120000	1.2013	1.1661	1.16827	1.14401
chr16	50760001	50920000	0.901142	0.725514	0.630397	0.605346
chr16	52200001	52240000	1.65512	1.52442	0.983919	0.88497
chr16	53320001	53400000	1.0702	1.0238	0.792209	0.913062
chr16	55280001	55440000	0.513116	0.527316	0.412144	0.44339
chr16	56040001	56120000	2.20533	2.39823	2.05717	2.03585
chr16	57120001	57200000	0.892875	0.90496	0.8145	0.696212
chr16	57600001	57680000	1.17852	0.994727	0.976004	0.994284
chr16	58760001	58880000	1.0864	0.910215	0.685947	0.781346
chr16	59400001	59560000	1.50413	1.50923	0.723371	0.730194
chr16	62800001	62920000	2.03918	1.9929	1.36317	1.44643
chr16	63840001	63920000	0.782142	0.692615	0.526024	0.46695
chr16	64680001	64800000	1.29363	1.27177	0.95916	0.99271
chr16	65480001	65640000	0.565541	0.465366	0.468605	0.562731
chr16	66120001	66200000	1.37794	1.2168	1.62549	1.61497
chr16	67120001	67200000	0.512414	0.461907	0.179255	0.192555
chr16	67880001	67960000	0.766475	0.745534	NA	NA
chr16	68560001	68640000	0.485323	0.523881	0.367661	0.344335
chr16	71120001	71240000	2.65881	2.57892	1.40934	1.43883
chr16	72240001	72280000	1.49799	1.51185	1.46169	1.44623
chr16	73040001	73080000	1.33021	1.45794	1.01557	0.90136
chr16	74120001	74240000	0.449538	0.445064	0.184697	0.131804
chr16	74880001	75000000	0.86645	0.774853	0.595503	0.536194
chr16	75560001	75640000	1.86549	1.89278	1.60011	1.56677
chr16	77000001	77040000	2.39517	2.37227	2.46206	2.57857
chr16	78160001	78240000	0.792934	0.697102	0.935897	0.905809
chr16	78880001	79040000	0.689714	0.58301	1.13263	1.24498
chr16	79880001	79960000	1.05604	1.00336	0.632592	0.699594
chr16	81160001	81240000	1.63378	1.52809	1.0353	1.0488
chr16	82640001	82760000	0.788417	0.760769	1.02928	1.0796
chr16	83880001	83960000	0.642128	0.680976	0.741632	0.749414
chr16	84680001	84800000	2.41603	2.41533	1.75621	1.81695
chr16	85720001	85800000	2.41674	2.56123	1.76385	1.751
chr16	86560001	86640000	0.494514	0.476508	0.351887	0.353367
chr16	87440001	87520000	4.16349	4.38577	2.86565	2.81522
chr16	88200001	88240000	0.718932	0.77102	0.822509	0.825942
chr16	88840001	88960000	0.764913	0.786623	0.611889	0.626724
chr16	89880001	89960000	NA	NA	0.979174	1.01804
chr16	90040001	90080000	0.399002	0.488806	NA	NA
chr16	90880001	90920000	0.657896	0.824696	0.712716	0.669133
chr16	91600001	91680000	1.73612	1.68545	1.36617	1.32699
chr16	92440001	92520000	1.90886	2.01454	1.42666	1.40321
chr16	93800001	93880000	2.93808	2.88852	2.72095	2.15852
chr16	94640001	94760000	1.16429	1.26679	0.75622	1.1072
chr16	95760001	95840000	0.78196	0.76433	0.552002	0.701135
chr16	96400001	96480000	1.14933	1.00954	1.05939	0.894197
chr16	97720001	97800000	NA	NA	0.461396	0.488253
chr17	4760001	4880000	0.485946	0.521038	0.373954	0.437981
chr17	5360001	5400000	1.32729	1.39267	1.40605	1.25849
chr17	6440001	6520000	3.28372	2.91988	3.04241	3.58802
chr17	6960001	7040000	3.8856	2.99163	3.25688	2.97289
chr17	8120001	8200000	0.787213	0.952783	0.673236	0.879868
chr17	8720001	8760000	0.328578	0.449112	NA	NA
chr17	9200001	9280000	0.688018	0.716437	0.704791	0.861041
chr17	9920001	9960000	0.578144	0.620355	NA	NA
chr17	10600001	10680000	0.547328	0.497282	0.52785	0.581262
chr17	11480001	11520000	0.165937	0.204404	NA	NA
chr17	12240001	12360000	1.1178	1.14601	0.887528	0.857301
chr17	13360001	13520000	1.3761	1.33562	1.81694	1.72013
chr17	14200001	14280000	1.20583	1.20228	1.54671	1.53523
chr17	15120001	15200000	0.961559	0.975068	0.436359	0.501641
chr17	15760001	15840000	1.80943	1.89622	1.13281	1.2111
chr17	17080001	17160000	2.21829	2.26463	1.84077	1.76837
chr17	17960001	18080000	1.31958	1.21763	0.553412	0.496906
chr17	18880001	19000000	0.205292	0.225294	NA	NA
chr17	20200001	20240000	0.29527	0.211202	NA	NA
chr17	21840001	21920000	0.791327	0.660404	1.09739	1.19895
chr17	22600001	22720000	0.569396	0.650962	0.508472	0.480385
chr17	23800001	23880000	2.4581	2.32886	2.1035	1.97662
chr17	24480001	24600000	0.251129	0.287013	NA	NA
chr17	26160001	26240000	1.09462	1.03725	0.94732	1.06787
chr17	27080001	27160000	0.913819	0.783346	0.784983	0.857822
chr17	28320001	28400000	0.53763	0.514982	0.621094	0.656987
chr17	29480001	29560000	0.62338	0.714875	0.751873	0.725239
chr17	30680001	30720000	1.89147	1.86774	2.1269	2.03398
chr17	31560001	31680000	2.06396	2.02617	1.8493	2.06262
chr17	32480001	32560000	1.56195	1.51182	1.82749	1.94093
chr17	34120001	34200000	1.97116	2.08048	1.45819	1.31724
chr17	34960001	35040000	NA	NA	0.81699	0.727965
chr17	35160001	35280000	1.09762	0.301903	NA	NA
chr17	35360001	35400000	NA	NA	0.233711	0.158629
chr17	36200001	36280000	2.07892	2.39042	1.93102	2.32568
chr17	37080001	37120000	0.788651	0.897685	NA	NA
chr17	37280001	37320000	NA	NA	0.455104	0.625646
chr17	38120001	38160000	0.373088	0.256255	NA	NA
chr17	38280001	38320000	NA	NA	0.338494	0.200799
chr17	39240001	39440000	0.167361	0.146406	0.320449	0.229529
chr17	40080001	40200000	0.499754	0.433577	0.469503	0.433206
chr17	40960001	41040000	1.20343	1.1414	0.974909	0.892398
chr17	42000001	42040000	0.355667	0.383367	0.493319	0.518146
chr17	42800001	42920000	2.23266	2.10309	1.47281	1.40433
chr17	43800001	43920000	0.597327	0.570168	0.340282	0.333231
chr17	44160001	44280000	NA	NA	0.730079	0.742069
chr17	45600001	45680000	3.09285	3.16161	3.20837	3.03282
chr17	46960001	47040000	0.931067	0.983087	0.660922	0.786733
chr17	47800001	47880000	1.26013	1.23648	1.00532	1.32756
chr17	49440001	49520000	0.9322	0.891336	0.711684	0.801251
chr17	50160001	50280000	0.976812	0.994516	1.09438	1.07422
chr17	50960001	51040000	0.366612	0.434004	0.6892	0.679667
chr17	51560001	51600000	0.128607	0.144826	NA	NA
chr17	51680001	51760000	NA	NA	0.201231	0.197474
chr17	52560001	52640000	1.22053	1.23337	1.07999	1.01973
chr17	53520001	53600000	1.70253	1.56295	1.07736	1.06642
chr17	54520001	54640000	0.578463	0.581935	0.487249	0.554435
chr17	56080001	56160000	2.56843	2.62097	3.0166	3.00485
chr17	57440001	57480000	2.3225	2.35398	1.64553	1.68352
chr17	59040001	59120000	2.01881	2.12095	1.77247	1.75082
chr17	59800001	59920000	0.388419	0.338092	0.406374	0.41771
chr17	60600001	60760000	0.25456	0.374601	0.296563	0.349409
chr17	61840001	62000000	1.36963	0.894491	0.242735	3.47888
chr17	62400001	62520000	1.1894	0.887526	0.426669	0.584521
chr17	63320001	63400000	NA	NA	1.08403	1.01844
chr17	63680001	63800000	1.10187	0.960963	0.777482	0.822936
chr17	64840001	65000000	0.477035	0.481798	0.172434	0.172455
chr17	65920001	65960000	2.95535	3.04548	2.05345	1.89115
chr17	66880001	66960000	1.63534	1.63623	1.03434	1.18391
chr17	68040001	68120000	0.727092	0.89877	0.775224	0.871156
chr17	69480001	69560000	1.18078	1.14955	1.30624	1.02688
chr17	70960001	71080000	1.77358	1.30997	1.0249	0.996768
chr17	71920001	71960000	2.71711	2.50352	2.29839	2.13808
chr17	73040001	73160000	1.45401	1.49034	1.00948	1.04244
chr17	74920001	74960000	1.48572	1.36916	NA	NA
chr17	75040001	75080000	NA	NA	1.15393	1.19515
chr17	75960001	76000000	1.85154	1.62767	1.46441	1.53235
chr17	77520001	77600000	0.286475	0.245469	0.404315	0.316925
chr17	79200001	79320000	1.81839	1.79885	1.6504	1.5346
chr17	80720001	80760000	0.765904	0.824705	0.705501	0.818992
chr17	81480001	81520000	2.01117	1.90797	1.38636	1.47641
chr17	82040001	82120000	0.524071	0.484114	NA	NA
chr17	83400001	83480000	1.54985	1.67954	1.7169	1.62115
chr17	84200001	84240000	1.5196	1.53389	1.57223	1.63459
chr17	84960001	85080000	1.33756	1.28473	1.488	1.5691
chr17	86480001	86560000	1.40976	1.38125	1.19067	1.21541
chr17	87440001	87600000	0.275181	0.433121	0.323092	0.232289
chr17	88160001	88200000	0.853377	1.18244	0.863488	0.636136
chr17	89080001	89200000	0.846487	0.854664	0.572787	0.485731
chr17	89960001	90040000	0.530913	0.542862	0.189785	0.287603
chr17	90920001	91000000	2.21123	2.08777	1.30678	1.32833
chr17	92440001	92560000	0.478503	0.535613	0.547261	0.502935
chr17	93480001	93560000	1.51354	1.41722	1.27758	1.33436
chr17	94200001	94280000	0.46677	0.518856	0.361328	0.374051
chr18	4320001	4360000	1.41159	1.24607	1.41141	1.37655
chr18	5080001	5120000	1.90924	1.89596	1.81251	1.873
chr18	6240001	6400000	1.9509	1.82847	1.66839	1.70493
chr18	7840001	7880000	2.83242	2.75708	2.32287	2.30807
chr18	8640001	8680000	0.143308	0.166903	NA	NA
chr18	9280001	9360000	1.81673	1.76191	1.05359	1.06509
chr18	9960001	10000000	0.811157	0.819294	0.855226	0.908792
chr18	10720001	10800000	2.00455	2.03256	2.00039	1.9535
chr18	11760001	11840000	1.01712	1.14293	0.954929	1.07545
chr18	12280001	12320000	0.246345	0.187898	NA	NA
chr18	13080001	13160000	1.43899	1.42741	1.27895	1.28021
chr18	14760001	14880000	1.54833	1.55117	1.14133	1.03156
chr18	15440001	15640000	0.236824	0.140377	0.165386	0.209238
chr18	16320001	16360000	1.19901	1.16332	1.04046	1.13774
chr18	17000001	17080000	0.568863	0.608634	0.337474	0.369733
chr18	18000001	18200000	0.320783	0.317965	0.253432	0.244846
chr18	20080001	20120000	1.33444	1.28356	1.00309	1.09428
chr18	21160001	21240000	1.3122	1.19449	0.861083	0.910347
chr18	22760001	22880000	0.507074	0.508628	0.388888	0.430452
chr18	23920001	24000000	1.01993	1.14074	1.13514	1.17342
chr18	24760001	24840000	0.359521	0.456458	0.543761	0.495897
chr18	25360001	25440000	0.618121	0.618285	0.751886	0.789587
chr18	27360001	27440000	0.337256	0.324098	0.53448	0.474117
chr18	28280001	28320000	0.46383	0.494908	0.475495	0.491386
chr18	30320001	30480000	1.71022	1.68488	1.22664	1.09531
chr18	31760001	31840000	3.27656	3.25335	2.73577	2.72614
chr18	32520001	32600000	1.52381	1.46566	1.18381	1.1765
chr18	33200001	33280000	0.616647	0.600837	NA	NA
chr18	34680001	34720000	NA	NA	1.88902	1.93531
chr18	34840001	34920000	1.5001	1.44558	NA	NA
chr18	35840001	35920000	1.75909	1.93927	1.84987	1.69644
chr18	36960001	37040000	3.27442	3.32944	4.09178	4.12702
chr18	38000001	38080000	3.05799	3.04712	3.20296	3.10438
chr18	39160001	39240000	0.772433	0.771115	0.749747	0.682197
chr18	40400001	40480000	3.87119	3.79788	2.73231	2.6665
chr18	42480001	42560000	1.93793	1.9817	1.74367	1.79017
chr18	43520001	43600000	1.12225	1.06797	1.13384	1.13925
chr18	45040001	45080000	3.28449	3.44139	2.63223	2.57873
chr18	46360001	46440000	1.17247	1.09161	0.813158	0.720538
chr18	47040001	47120000	1.00014	0.906181	0.523504	0.501548
chr18	49840001	49920000	1.45038	1.27404	1.07439	1.00291
chr18	50320001	50360000	1.40443	1.45108	1.09101	1.01886
chr18	51120001	51160000	0.329552	0.39756	NA	NA
chr18	51920001	51960000	0.276177	0.298011	0.323428	0.324791
chr18	52920001	53040000	1.71557	1.67335	1.53913	1.57268
chr18	54040001	54120000	2.50514	2.43904	2.15894	2.17855
chr18	54840001	55040000	0.384135	0.398057	0.189139	0.239029
chr18	55880001	55960000	0.187537	0.182184	NA	NA
chr18	56520001	56600000	2.13466	2.22271	2.05784	2.01036
chr18	57480001	57560000	1.54085	1.43316	1.59076	1.63402
chr18	58120001	58280000	1.0106	1.03101	0.705294	0.652828
chr18	59200001	59240000	1.51229	1.69433	1.72851	1.63877
chr18	60640001	60760000	1.46204	1.36774	1.23939	1.16891
chr18	61880001	61960000	1.80086	1.85641	0.958604	1.05528
chr18	63160001	63200000	0.441381	0.381785	NA	NA
chr18	63840001	63880000	6.35498	6.24141	4.60521	4.40779
chr18	64680001	64720000	2.22574	2.07004	1.75285	1.81344
chr18	65480001	65560000	0.4472	0.422738	0.727517	0.575979
chr18	66120001	66200000	0.568574	0.66783	0.869681	0.843463
chr18	66600001	66640000	0.398597	0.377033	NA	NA
chr18	66720001	66760000	NA	NA	0.660812	0.601121
chr18	67400001	67480000	0.988551	0.788008	0.712048	0.786613
chr18	67880001	67960000	0.397495	0.484038	0.380006	0.392137
chr18	68560001	68640000	1.01822	0.918008	1.00505	0.984969
chr18	69960001	70000000	0.806702	0.774619	0.637674	0.675664
chr18	70640001	70720000	0.572232	0.476634	0.59436	0.53355
chr18	71440001	71480000	1.54821	1.43653	1.32639	1.20237
chr18	72200001	72360000	0.468905	0.541822	0.351273	0.444723
chr18	73760001	73800000	1.1566	1.0639	1.06812	1.07782
chr18	74400001	74480000	NA	NA	0.335853	0.306215
chr18	75160001	75200000	2.03444	1.97537	1.83888	1.84572
chr18	75880001	75920000	1.64831	1.71433	1.50723	1.47656
chr18	76520001	76560000	0.317016	0.267347	0.271411	0.207317
chr18	77120001	77280000	0.163634	0.259945	0.287638	0.416294
chr18	78080001	78160000	1.53653	1.43668	1.39561	1.35295
chr18	80360001	80440000	0.893366	0.867995	0.936705	0.90705
chr18	81080001	81160000	1.03713	1.00543	1.05708	1.1161
chr18	82520001	82680000	0.637507	0.554544	0.738033	0.673721
chr18	83200001	83240000	1.51334	1.63205	1.04672	1.22497
chr18	84800001	84880000	1.59467	1.49384	1.54987	1.58048
chr18	86000001	86040000	NA	NA	0.143285	0.109015
chr18	86720001	86800000	1.67952	1.93427	1.36865	1.43377
chr18	87800001	87880000	0.190913	0.162669	0.18278	0.200366
chr18	89000001	89080000	1.50444	1.52734	1.32204	1.2306
chr18	89920001	90000000	0.384694	0.332506	0.171871	0.192335
chr19	4120001	4200000	0.711052	0.65601	NA	NA
chr19	5400001	5560000	0.336381	0.349915	0.386936	0.499617
chr19	6360001	6480000	1.24097	1.05259	0.590653	0.585871
chr19	7040001	7120000	1.1522	0.927541	0.871544	0.944151
chr19	7600001	7680000	2.41133	2.18128	2.81235	2.64298
chr19	8720001	8760000	2.15632	2.01243	2.38116	2.44511
chr19	9240001	9280000	NA	NA	1.32822	1.28506
chr19	9920001	10000000	2.161	2.09824	2.6485	2.59474
chr19	10880001	11000000	NA	NA	0.464237	0.56876
chr19	12080001	12120000	0.990049	0.966553	0.909888	0.969888
chr19	13960001	14040000	2.48726	2.45857	2.30789	2.40165
chr19	15080001	15120000	1.11177	0.973431	0.88836	0.994003
chr19	16000001	16040000	1.94287	1.81909	1.67291	1.6911
chr19	16800001	16840000	0.952757	0.894756	1.3255	1.25509
chr19	17520001	17600000	0.979981	0.934539	0.801651	0.87001
chr19	18760001	18880000	2.84619	2.80414	1.49369	1.44157
chr19	20440001	20520000	0.924719	0.925506	0.88609	0.98326
chr19	21760001	21800000	1.03886	0.969561	0.586571	0.587514
chr19	22920001	23000000	0.80887	0.939613	0.899587	0.983958
chr19	24160001	24320000	0.86649	0.935161	0.627302	0.601851
chr19	25000001	25120000	1.28448	1.25083	1.22555	1.17267
chr19	25680001	25720000	NA	NA	0.246488	0.325242
chr19	26680001	26800000	1.99184	2.05391	1.19218	1.18053
chr19	27520001	27560000	1.979	2.0095	1.85754	1.72291
chr19	28200001	28280000	1.0241	0.908464	1.22097	1.18512
chr19	28920001	28960000	1.42541	1.36249	1.16424	1.17575
chr19	29680001	29760000	0.600615	0.692588	0.460043	0.453217
chr19	30280001	30320000	1.53838	1.58308	1.57138	1.51781
chr19	32000001	32080000	1.81647	1.8336	2.20859	2.15283
chr19	32720001	32760000	0.97105	1.09092	1.27015	1.23458
chr19	33400001	33480000	0.943587	1.15223	0.812346	0.825899
chr19	34200001	34280000	1.97987	1.96858	1.24904	1.26385
chr19	35040001	35080000	2.09404	2.19305	1.55777	1.64717
chr19	36160001	36200000	NA	NA	0.924879	0.977435
chr19	36800001	36920000	0.748194	0.702861	0.830289	0.937125
chr19	37560001	37680000	0.506355	0.447554	0.342652	0.35905
chr19	38280001	38360000	0.288039	0.244806	0.337353	0.292599
chr19	38960001	39000000	2.90674	2.8574	2.17661	2.23565
chr19	40360001	40480000	1.4036	1.36952	1.24197	1.26233
chr19	41200001	41280000	1.26614	1.12696	1.86927	1.83632
chr19	42160001	42240000	1.60675	1.66995	1.81357	1.83448
chr19	42880001	42920000	0.854319	0.893049	0.715196	0.661778
chr19	43680001	43720000	2.34995	2.44189	2.29598	2.19289
chr19	45120001	45200000	1.48254	1.49243	1.15874	1.21303
chr19	46480001	46600000	0.513091	0.418089	0.208742	0.255878
chr19	47200001	47280000	1.28707	1.10895	1.62777	1.80489
chr19	47920001	48040000	1.39403	1.25286	0.848552	0.881378
chr19	49320001	49400000	0.371442	0.401685	0.461073	0.37182
chr19	50240001	50320000	1.54336	1.58295	0.89944	0.886899
chr19	51080001	51200000	0.509373	0.500392	0.529291	0.520262
chr19	52080001	52160000	0.383365	0.413192	NA	NA
chr19	53320001	53400000	1.62242	1.89385	1.05168	1.09953
chr19	55320001	55400000	2.62509	2.61631	2.44611	2.47952
chr19	56440001	56520000	1.09447	1.00096	0.542068	0.51802
chr19	57080001	57160000	NA	NA	0.525453	0.505057
chr19	57520001	57600000	1.23059	1.28741	1.21018	1.1305
chr19	58800001	58920000	1.42066	1.37458	1.22243	1.27637
chr19	59400001	59480000	0.740942	0.765491	NA	NA
chr19	60520001	60640000	NA	NA	0.849278	0.865398
chr2	4840001	4920000	1.852	1.87434	2.02233	1.90858
chr2	5920001	6000000	1.76562	1.71723	1.27046	1.29105
chr2	7720001	7760000	0.257448	0.227801	NA	NA
chr2	8520001	8600000	2.7379	2.70293	1.8869	1.90054
chr2	10120001	10160000	1.83069	1.99193	1.68971	1.66656
chr2	11160001	11280000	0.645291	0.671165	0.46114	0.367768
chr2	11680001	11760000	0.622432	0.688387	0.587941	0.578236
chr2	12320001	12400000	1.60028	1.67584	1.06695	1.06819
chr2	13160001	13200000	1.72509	1.77417	1.64889	1.63579
chr2	13920001	14040000	NA	NA	0.221567	0.271646
chr2	14880001	14960000	1.92888	1.91654	1.84627	1.84366
chr2	16200001	16280000	1.54522	1.46082	1.08725	1.09278
chr2	17320001	17400000	1.07592	1.01253	0.977818	1.09363
chr2	18480001	18600000	0.494812	0.418613	0.313509	0.390486
chr2	19320001	19400000	1.35216	1.28451	1.22075	1.29287
chr2	21080001	21160000	0.935026	0.842753	NA	NA
chr2	21680001	21880000	0.854737	0.80968	0.652485	0.730099
chr2	23000001	23080000	2.31149	1.17398	0.958339	1.06224
chr2	24040001	24080000	NA	NA	0.305542	0.400913
chr2	24160001	24200000	0.531803	0.557794	NA	NA
chr2	24800001	24840000	2.45703	2.27655	2.02421	2.02571
chr2	25200001	25360000	0.896806	0.915074	0.831772	0.935909
chr2	26600001	26680000	0.319901	0.215106	NA	NA
chr2	27360001	27480000	1.15402	1.24135	0.949225	0.986748
chr2	28360001	28440000	1.31153	1.36434	1.1573	1.19247
chr2	29640001	29680000	1.48424	1.74692	1.73204	1.63836
chr2	30800001	30840000	1.06901	0.989703	0.951905	0.878083
chr2	32160001	32200000	0.769193	0.644583	0.865298	0.797479
chr2	32680001	32720000	0.676611	0.722119	0.383345	0.36135
chr2	33400001	33480000	0.963493	0.920177	0.975507	1.06624
chr2	35080001	35160000	0.95058	0.964281	0.917234	1.02096
chr2	35960001	36040000	1.1163	1.04678	0.666453	0.631266
chr2	37200001	37280000	3.65878	3.54715	3.57047	3.61615
chr2	39000001	39080000	1.79564	1.88277	2.41126	2.17892
chr2	40960001	41040000	0.400531	0.393257	NA	NA
chr2	41840001	41920000	0.181658	0.241121	NA	NA
chr2	42560001	42680000	0.498915	0.498759	0.266959	0.243201
chr2	43560001	43640000	1.7004	1.60547	1.0865	1.12631
chr2	45000001	45120000	0.452876	0.450256	0.456365	0.374401
chr2	46000001	46040000	NA	NA	0.469793	0.390824
chr2	46400001	46480000	0.386588	0.297036	NA	NA
chr2	47200001	47360000	0.827499	0.852453	0.482776	0.539139
chr2	48760001	48800000	2.19965	2.06866	2.20136	2.12469
chr2	49600001	49640000	1.16682	1.08462	1.26019	1.23139
chr2	50160001	50200000	1.8033	1.69556	1.27448	1.33673
chr2	51080001	51160000	1.22372	1.09013	1.04654	0.860887
chr2	51920001	51960000	1.0125	1.00586	0.831666	0.872831
chr2	52520001	52600000	0.531016	0.488825	0.758298	0.76264
chr2	53080001	53160000	2.18901	2.15303	1.83482	1.80456
chr2	54040001	54120000	0.64546	0.713682	0.523042	0.458054
chr2	54800001	54880000	1.05991	0.97618	0.481937	0.449767
chr2	55880001	55960000	1.92281	1.95173	1.31238	1.25597
chr2	56680001	56800000	0.372098	0.382341	0.304072	0.354201
chr2	57800001	57880000	1.07766	1.01534	0.936227	1.04064
chr2	58440001	58520000	1.32676	1.44671	0.858209	0.889637
chr2	59320001	59400000	1.57495	1.56512	1.37322	1.3743
chr2	60280001	60360000	0.864248	0.96507	0.642462	0.678916
chr2	61400001	61440000	2.45039	2.38369	2.24474	2.33257
chr2	62400001	62480000	3.03542	3.03868	1.86113	1.89702
chr2	63320001	63400000	2.7692	2.69391	1.86649	1.88427
chr2	64040001	64160000	0.332254	0.29569	0.460754	0.461533
chr2	64800001	64840000	1.28794	1.20705	1.01433	1.036
chr2	65320001	65400000	0.471466	0.434405	0.485519	0.469842
chr2	66200001	66240000	0.556778	0.730426	0.497231	0.557164
chr2	66680001	66720000	0.673434	0.592319	0.794995	0.796869
chr2	67520001	67680000	0.518844	0.523516	0.507593	0.462771
chr2	68480001	68560000	1.54355	1.70938	1.28431	1.48769
chr2	69800001	69840000	1.01171	1.2349	NA	NA
chr2	69960001	70000000	NA	NA	0.383413	0.338339
chr2	70480001	70560000	1.33266	1.26338	1.77102	1.51383
chr2	70960001	71080000	0.339874	0.27186	NA	NA
chr2	71760001	71840000	0.396181	0.319552	0.586129	0.663294
chr2	72280001	72360000	1.30033	1.21939	0.810191	0.839594
chr2	73240001	73320000	1.68598	1.6444	1.55113	1.63199
chr2	73720001	73800000	0.944564	1.03415	0.442325	0.38814
chr2	74480001	74560000	0.614321	0.747704	0.471281	0.445638
chr2	75360001	75480000	0.862878	0.812974	0.822236	0.900756
chr2	75880001	75960000	1.31292	1.36758	1.42105	1.3202
chr2	76720001	76800000	1.0099	1.06177	0.715588	0.609312
chr2	77760001	77840000	2.17192	2.13255	2.57684	2.44489
chr2	78760001	78880000	1.52938	1.46886	0.708821	0.727005
chr2	79600001	79760000	0.539324	0.428391	0.296621	0.384274
chr2	80480001	80560000	1.69277	1.57845	1.34032	1.3312
chr2	81240001	81320000	NA	NA	0.201728	0.177208
chr2	81720001	81800000	0.383362	0.416484	NA	NA
chr2	82400001	82480000	0.454283	0.577334	0.324978	0.31719
chr2	83320001	83440000	1.966	1.95478	1.36974	1.3885
chr2	84360001	84440000	NA	NA	0.606576	0.612617
chr2	84760001	84960000	1.14613	1.1814	0.309557	0.228618
chr2	85400001	85560000	1.5325	1.51399	1.02216	1.11664
chr2	86480001	86560000	0.455426	0.416403	0.336228	0.36904
chr2	87240001	87320000	NA	NA	0.44942	0.467033
chr2	87520001	87600000	0.683929	0.880542	NA	NA
chr2	88240001	88320000	0.777238	0.915797	0.862622	0.801207
chr2	89400001	89520000	0.283481	0.327175	0.166341	0.1744
chr2	90280001	90400000	2.797	3.01947	2.90171	2.87779
chr2	91480001	91560000	0.324624	0.21573	0.220406	0.16892
chr2	92240001	92320000	1.2937	1.22497	1.71797	1.80291
chr2	94200001	94240000	2.39601	2.50108	2.21907	2.29077
chr2	95040001	95120000	1.57422	1.63576	1.30535	1.22396
chr2	96160001	96280000	1.66531	1.66369	1.38487	1.39773
chr2	97360001	97440000	1.06094	0.985046	0.782061	0.705698
chr2	99040001	99160000	0.4815	0.469673	0.167461	0.204594
chr2	100000001	100120000	0.355913	0.371934	0.257326	0.475883
chr2	100760001	100840000	NA	NA	0.210718	0.564172
chr2	101480001	101520000	3.53411	3.57409	2.54999	2.3693
chr2	102440001	102520000	0.958001	1.04571	0.75935	0.740584
chr2	103680001	103720000	1.01301	0.913554	1.05458	1.02203
chr2	104560001	104680000	0.958245	0.995393	0.954874	0.928822
chr2	106040001	106120000	1.58873	1.54906	1.48842	1.54293
chr2	106840001	106880000	2.11652	1.90966	1.32708	1.28228
chr2	107760001	107800000	2.9162	2.99251	2.66134	2.70406
chr2	108600001	108840000	0.435622	0.402045	0.193722	0.197029
chr2	109720001	109800000	1.632	1.5569	0.965942	0.920718
chr2	110920001	111000000	1.15601	1.11279	1.03488	1.05036
chr2	111960001	112040000	1.32432	1.17319	1.26721	1.25323
chr2	112320001	112440000	0.875816	0.761795	0.592939	0.722668
chr2	113320001	113360000	NA	NA	0.413485	0.467209
chr2	113960001	114040000	1.03015	0.942034	1.2445	1.12073
chr2	115320001	115400000	NA	NA	0.19749	0.199148
chr2	115960001	116040000	1.67769	1.68842	0.799292	0.930577
chr2	116640001	116720000	1.12539	1.2027	0.876901	0.889526
chr2	117240001	117280000	1.63869	1.62549	1.58446	1.56021
chr2	118200001	118280000	1.74542	1.62357	1.66933	1.62841
chr2	118920001	119000000	0.58776	0.568701	0.263546	0.437382
chr2	119440001	119480000	0.549729	0.498159	NA	NA
chr2	120160001	120240000	0.53862	0.421034	0.418245	0.413582
chr2	121240001	121280000	1.4079	1.29789	1.65128	1.75225
chr2	121960001	122000000	1.02186	1.18112	0.68496	0.742948
chr2	122920001	123080000	0.360075	0.33593	0.714522	0.721759
chr2	123960001	124120000	0.262831	0.275412	0.256413	0.253018
chr2	125440001	125480000	1.07566	1.14561	1.09019	1.21702
chr2	126480001	126520000	2.54737	2.63268	2.29037	2.63724
chr2	127000001	127080000	0.519094	0.5101	0.647096	0.816712
chr2	128520001	128600000	1.77584	1.8227	1.69587	1.81242
chr2	129120001	129240000	0.821083	0.753104	0.934168	0.744603
chr2	130200001	130280000	2.25597	2.38098	2.25965	2.38594
chr2	131120001	131200000	NA	NA	0.324407	0.379143
chr2	132720001	132800000	1.84353	1.88185	1.178	1.22291
chr2	134320001	134400000	1.36865	1.4159	1.22639	1.26183
chr2	135160001	135240000	1.69121	1.71588	1.55961	1.72805
chr2	135880001	135960000	1.15622	1.08938	1.15312	1.27465
chr2	136760001	136840000	2.28498	2.23478	1.47877	1.49549
chr2	137760001	137800000	2.5879	2.68395	2.00475	2.0637
chr2	139200001	139280000	1.10035	0.876984	1.21807	1.11261
chr2	140160001	140240000	1.85073	1.68239	1.66745	1.57191
chr2	141240001	141440000	0.864532	0.813271	0.348594	0.37702
chr2	142920001	143000000	1.43193	1.31166	0.904877	0.88725
chr2	143560001	143680000	1.37119	1.35127	1.03832	1.06881
chr2	144400001	144440000	2.16482	2.01407	1.93033	1.98941
chr2	145600001	145680000	2.25229	1.82506	1.54642	1.63795
chr2	146320001	146360000	NA	NA	0.600646	0.61724
chr2	147080001	147160000	0.747038	0.715258	0.58732	0.590127
chr2	147640001	147720000	0.667087	0.539629	0.740614	0.639706
chr2	148640001	148720000	2.89718	2.79968	2.30269	2.20368
chr2	149960001	150040000	1.09824	1.19472	NA	NA
chr2	150400001	150480000	0.349651	0.354962	0.443803	0.3281
chr2	151200001	151400000	0.462237	0.451014	0.4393	0.389175
chr2	152360001	152440000	0.523718	0.48942	0.725417	0.914919
chr2	153440001	153520000	0.898959	0.641078	0.791923	0.938781
chr2	154200001	154280000	1.56318	1.61284	1.78907	1.73275
chr2	154880001	155000000	0.182962	0.148099	0.219139	0.311547
chr2	155880001	155920000	0.194767	0.308866	NA	NA
chr2	156200001	156280000	NA	NA	0.196065	0.455503
chr2	156960001	157000000	0.782748	0.826602	0.337143	0.357287
chr2	158320001	158400000	2.15004	1.69118	1.96712	1.63145
chr2	160400001	160440000	NA	NA	0.717051	0.638551
chr2	160800001	160960000	1.40947	1.34771	1.41193	1.44029
chr2	162640001	162680000	1.20773	1.16047	1.4214	1.34729
chr2	163200001	163280000	0.370422	0.355767	0.452051	0.320862
chr2	163640001	163760000	0.342074	0.392449	0.36088	0.37669
chr2	164600001	164680000	1.02723	1.16613	0.750749	0.704176
chr2	165880001	166000000	1.86865	1.86682	1.20368	1.27899
chr2	166640001	166720000	2.04483	1.83677	1.96314	1.94392
chr2	167280001	167400000	0.440857	0.201195	0.286112	0.180201
chr2	167960001	168000000	2.73846	2.47615	2.68468	2.7147
chr2	168680001	168760000	0.809979	0.784138	0.802821	0.874057
chr2	170320001	170440000	0.835705	0.774442	0.509154	0.52095
chr2	171880001	172080000	0.588429	0.417602	0.583139	0.627116
chr2	172800001	172920000	0.399889	0.204534	0.432205	0.399901
chr2	173400001	173480000	0.465501	0.462628	0.430827	0.308309
chr2	174040001	174080000	0.853132	0.800353	0.711997	0.706165
chr2	177680001	177800000	0.566472	0.707836	0.813165	0.578906
chr2	179600001	179640000	NA	NA	1.85583	1.80262
chr2	179720001	179760000	2.53891	2.52132	NA	NA
chr3	4560001	4640000	0.483852	0.471966	0.455811	0.481722
chr3	6160001	6240000	0.931871	0.919796	0.4138	0.548242
chr3	7240001	7320000	1.72518	1.69292	1.39314	1.41492
chr3	8600001	8720000	1.07665	0.910673	1.08605	1.12716
chr3	10400001	10480000	2.61248	2.66227	1.32472	1.33437
chr3	11720001	11800000	0.205508	0.22471	0.384816	0.406187
chr3	13120001	13200000	0.700219	0.591217	0.556456	0.675221
chr3	13800001	13880000	1.83703	1.70052	1.0147	0.991724
chr3	14600001	14680000	0.89731	0.947923	0.801307	0.756068
chr3	15320001	15400000	1.65335	1.75016	0.977482	1.00614
chr3	15960001	16000000	NA	NA	0.307756	0.331704
chr3	16160001	16240000	1.45108	1.58209	NA	NA
chr3	16880001	17000000	0.33766	0.309705	0.287392	0.381711
chr3	17800001	17840000	2.37033	2.27907	1.91302	1.94181
chr3	19000001	19080000	1.97068	1.86345	1.6902	1.68578
chr3	20240001	20320000	1.83576	1.80339	1.77782	1.80024
chr3	22160001	22240000	3.08536	2.93602	2.25075	2.28021
chr3	22640001	22760000	0.433836	0.386244	NA	NA
chr3	23840001	24040000	0.152242	0.146981	0.238651	0.281823
chr3	25000001	25160000	0.716198	0.713031	0.501869	0.47722
chr3	25960001	26040000	0.695526	0.809847	0.814455	0.775866
chr3	27200001	27280000	1.70263	1.71881	2.05019	2.08714
chr3	27920001	28000000	0.870581	0.719412	0.574273	0.514349
chr3	28760001	28800000	2.45194	2.41002	2.78756	2.7528
chr3	29640001	29680000	1.69346	1.64641	1.15656	1.22175
chr3	30600001	30640000	NA	NA	0.990311	0.901331
chr3	31000001	31120000	1.10514	0.888395	0.236353	0.249931
chr3	31560001	31680000	0.458919	0.32185	0.526135	0.574126
chr3	32640001	32720000	1.14879	1.03323	1.29994	1.34213
chr3	33680001	33800000	1.18325	1.19586	0.852393	0.992099
chr3	35520001	35560000	1.70494	1.84143	1.38363	1.45769
chr3	36480001	36600000	0.44627	0.473712	0.268321	0.140789
chr3	37280001	37320000	2.35285	2.30765	1.80977	1.86908
chr3	38080001	38160000	1.32947	1.38493	1.09563	1.32362
chr3	38760001	38800000	1.52767	1.68731	1.2465	1.31289
chr3	39720001	39760000	0.259623	0.238946	NA	NA
chr3	40400001	40520000	2.35411	2.36565	1.80728	1.866
chr3	41600001	41720000	1.87568	2.35248	2.05671	2.08438
chr3	43160001	43200000	0.265554	0.300492	NA	NA
chr3	43400001	43440000	NA	NA	0.241008	0.321802
chr3	44960001	45120000	1.30323	1.32664	1.03208	1.18195
chr3	45840001	45920000	0.215768	0.214246	NA	NA
chr3	46960001	47040000	0.246861	0.291953	NA	NA
chr3	47440001	47480000	NA	NA	0.169758	0.233705
chr3	48640001	48800000	0.851939	0.976749	0.42433	0.472451
chr3	50000001	50080000	0.880098	0.910507	0.557166	0.603468
chr3	51080001	51120000	2.77565	2.68379	2.50937	2.43572
chr3	52080001	52120000	2.50362	2.37225	2.3007	2.33445
chr3	52760001	52880000	0.841445	0.71351	0.546471	0.569649
chr3	53360001	53440000	0.86939	0.892492	0.832462	0.714193
chr3	54040001	54160000	0.834066	0.746219	0.358947	0.466172
chr3	54640001	54760000	0.761263	0.680683	0.357261	0.277029
chr3	55040001	55120000	NA	NA	0.679919	0.514592
chr3	55720001	55840000	0.531068	0.592589	0.595612	0.526343
chr3	57440001	57520000	0.91329	0.810653	0.842924	0.877375
chr3	58560001	58640000	1.40794	1.11535	1.07978	1.12123
chr3	59760001	59800000	1.30883	1.3668	0.827022	0.836984
chr3	60560001	60600000	1.15547	1.11374	NA	NA
chr3	60720001	60840000	NA	NA	1.51848	1.4516
chr3	61920001	62000000	0.804818	0.750733	0.650323	0.687793
chr3	62480001	62640000	1.14349	1.27997	0.988649	1.00318
chr3	63760001	63800000	2.31227	2.41154	1.96608	2.00554
chr3	64680001	64760000	1.65556	1.78521	1.37785	1.36126
chr3	65960001	66080000	1.81543	1.8568	0.839538	0.81223
chr3	67280001	67360000	1.4962	1.57879	1.49218	1.41622
chr3	67800001	67920000	0.337367	0.412334	NA	NA
chr3	68800001	68880000	1.03629	1.17604	1.26417	1.3113
chr3	69720001	69800000	2.01271	1.96492	2.13789	2.11566
chr3	71000001	71080000	0.244869	0.299731	0.24901	0.232968
chr3	71840001	71920000	0.297838	0.260005	0.193522	0.200869
chr3	72880001	72960000	1.60887	1.58816	0.858095	0.826768
chr3	73640001	73680000	0.254707	0.262324	NA	NA
chr3	73880001	73960000	NA	NA	0.15241	0.146193
chr3	74920001	75000000	1.53871	1.53982	1.17901	1.11362
chr3	75800001	75880000	1.80723	1.76341	1.57717	1.52827
chr3	76680001	76720000	0.114137	0.156609	NA	NA
chr3	77160001	77240000	0.356836	0.306021	0.362641	0.280574
chr3	78720001	78800000	2.84689	2.6314	2.66439	2.80341
chr3	79480001	79560000	1.27231	1.33005	1.1788	1.26921
chr3	80640001	80720000	1.9923	1.94947	1.26604	1.29107
chr3	81800001	81880000	0.760975	0.7911	0.709805	0.777744
chr3	82880001	82920000	0.358114	0.358587	0.373265	0.301998
chr3	83600001	83720000	1.8947	1.93384	1.38392	1.48127
chr3	84480001	84560000	0.987277	0.820308	0.674744	0.72758
chr3	85960001	86000000	1.63153	1.48939	1.59977	1.46859
chr3	86720001	86760000	1.22143	1.11028	1.00606	1.12373
chr3	87560001	87640000	1.17653	1.17663	1.21007	1.21724
chr3	89040001	89120000	1.15588	1.10406	1.31454	1.19467
chr3	90400001	90520000	2.35236	2.24659	2.34895	2.4437
chr3	91840001	91880000	2.70201	2.71606	1.70574	1.85499
chr3	92760001	92880000	0.951081	0.989573	0.999093	0.99942
chr3	94200001	94240000	1.68401	1.96169	2.15151	2.43196
chr3	94800001	94880000	1.05349	1.07033	1.24486	1.44634
chr3	95920001	95960000	0.21484	0.318635	NA	NA
chr3	96440001	96560000	1.17026	1.07194	0.842626	0.887797
chr3	97480001	97520000	1.65196	1.72128	1.6874	1.66673
chr3	98120001	98280000	0.263219	0.422444	0.530914	0.765604
chr3	98680001	98760000	0.742237	0.846754	NA	NA
chr3	99880001	99960000	1.3291	1.21166	1.42828	1.44071
chr3	100600001	100680000	0.670533	0.613346	0.762566	0.782939
chr3	101760001	101840000	0.702496	0.757766	0.638717	0.672168
chr3	102800001	102880000	1.07386	0.979588	1.00805	0.994497
chr3	103680001	103720000	1.7924	1.82271	2.15843	2.0202
chr3	104680001	104760000	1.7219	1.64933	1.54693	1.61378
chr3	105680001	105760000	0.803879	0.741061	1.05307	0.935533
chr3	107400001	107480000	1.03815	1.23622	0.705846	0.85932
chr3	108760001	108880000	0.780067	0.693505	0.630601	0.480508
chr3	109320001	109360000	NA	NA	0.737144	0.659111
chr3	110440001	110480000	NA	NA	0.225432	0.218052
chr3	111120001	111240000	0.419097	0.500614	0.320747	0.27102
chr3	112960001	113120000	1.03136	1.21926	1.2832	1.20768
chr3	113800001	113880000	1.00291	1.00623	0.686243	0.638113
chr3	114720001	114760000	0.506441	0.436146	NA	NA
chr3	115480001	115640000	1.46269	1.45198	1.40745	1.40833
chr3	116600001	116640000	1.78025	1.74494	1.91955	1.78335
chr3	118000001	118120000	0.597046	0.531987	0.485646	0.479805
chr3	119040001	119160000	NA	NA	0.611985	0.527318
chr3	119240001	119320000	0.654277	0.639031	NA	NA
chr3	120080001	120120000	0.683541	0.712593	NA	NA
chr3	120200001	120240000	NA	NA	0.618352	0.606231
chr3	120920001	120960000	1.94286	1.87963	1.48313	1.41969
chr3	122280001	122360000	0.154393	0.220686	NA	NA
chr3	123080001	123160000	1.80898	1.78433	1.61592	1.63748
chr3	124240001	124320000	0.889585	0.926722	0.861784	0.838952
chr3	125480001	125560000	0.77603	0.826905	1.21261	1.26055
chr3	126720001	126800000	1.32033	1.25829	1.42689	1.44424
chr3	127640001	127760000	0.441945	0.524134	0.698412	0.677902
chr3	129480001	129520000	0.987279	0.942691	NA	NA
chr3	129680001	129720000	NA	NA	0.408992	0.590509
chr3	130320001	130360000	NA	NA	0.200583	0.323888
chr3	131000001	131080000	1.02285	1.09796	0.901474	1.04193
chr3	132360001	132440000	1.28972	1.49819	1.39005	1.46644
chr3	132800001	132960000	NA	NA	0.218519	0.225563
chr3	134280001	134360000	1.41834	1.36022	0.943168	0.89962
chr3	135440001	135520000	1.75776	1.72061	1.48277	1.52583
chr3	136800001	136920000	0.247627	0.190311	0.574224	0.514583
chr3	137520001	137560000	0.874456	0.840977	0.462469	0.509085
chr3	138040001	138080000	0.714965	0.6048	NA	NA
chr3	138880001	139000000	1.89731	1.79616	2.0214	2.08471
chr3	139840001	139920000	NA	NA	0.191491	0.210076
chr3	140320001	140360000	0.53833	0.49427	NA	NA
chr3	141480001	141560000	1.07596	1.00971	1.09379	1.21139
chr3	142400001	142440000	1.62736	1.62371	1.14867	1.29377
chr3	144080001	144200000	1.99824	1.88755	1.82499	1.85317
chr3	145000001	145040000	0.124832	0.106169	NA	NA
chr3	145640001	145680000	1.44013	1.40345	1.42296	1.40425
chr3	146640001	146720000	2.81813	2.68091	2.54966	2.456
chr3	147680001	147760000	0.298172	0.326027	0.303032	0.382656
chr3	149240001	149360000	0.358612	0.387886	0.40152	0.414057
chr3	149880001	149920000	0.366426	0.388837	NA	NA
chr3	151360001	151440000	0.710702	0.759839	0.938817	0.893084
chr3	151840001	151880000	0.377291	0.469263	NA	NA
chr3	152360001	152440000	0.986175	1.0001	0.649191	0.681151
chr3	153440001	153520000	0.781258	0.846158	0.62219	0.639594
chr3	154200001	154280000	1.3637	1.22911	1.57722	1.59126
chr3	155040001	155120000	0.749553	0.68133	0.955765	0.960475
chr3	156400001	156440000	0.296445	0.238013	NA	NA
chr3	157240001	157280000	0.968837	1.02962	0.508152	0.529782
chr3	157800001	157840000	0.635436	0.594948	0.63576	0.651023
chr4	3840001	3920000	1.01979	0.996248	0.850114	0.77636
chr4	4720001	4800000	0.486365	0.427818	NA	NA
chr4	5320001	5440000	0.552445	0.378213	0.756982	0.737219
chr4	6280001	6360000	2.30624	2.23629	1.89461	1.84917
chr4	8240001	8400000	0.447985	0.368183	0.370086	0.352924
chr4	8960001	9040000	0.312682	0.402814	0.637585	0.541838
chr4	9640001	9760000	0.676971	0.727764	0.549307	0.652588
chr4	10760001	10840000	2.39463	2.58625	2.01624	1.85061
chr4	11320001	11400000	NA	NA	0.616749	0.70733
chr4	12120001	12240000	1.81533	1.88794	1.05407	0.977263
chr4	13680001	13760000	1.2154	1.25683	1.00659	0.98577
chr4	14480001	14520000	1.36475	1.29674	1.4769	1.38041
chr4	15080001	15240000	0.657127	0.608144	0.498778	0.403364
chr4	16000001	16040000	1.57893	1.74233	1.45941	1.46484
chr4	16960001	17040000	0.251095	0.262369	0.257862	0.217993
chr4	17760001	17880000	0.224965	0.206192	NA	NA
chr4	18600001	18640000	0.230562	0.150893	NA	NA
chr4	19360001	19480000	1.19738	1.27581	1.07573	1.09681
chr4	19840001	19880000	NA	NA	0.825375	0.828442
chr4	21480001	21600000	1.58255	1.60845	0.607949	0.855912
chr4	22640001	22680000	0.298894	0.165985	NA	NA
chr4	23320001	23440000	0.450255	0.458528	0.350314	0.357323
chr4	24600001	24720000	0.432806	0.189986	0.405518	0.415267
chr4	25200001	25320000	0.762638	0.766708	0.839645	0.816159
chr4	26480001	26560000	1.53708	1.50802	0.924189	0.882227
chr4	27800001	27920000	0.627807	0.569007	0.556598	0.580052
chr4	28800001	28840000	1.1642	1.15895	0.908556	0.846681
chr4	30360001	30440000	0.656323	0.482419	0.269173	0.340823
chr4	31280001	31360000	2.56203	2.84665	2.28405	2.60663
chr4	31800001	31880000	4.31581	5.75164	5.12204	2.97285
chr4	32680001	32720000	0.44326	0.586218	0.642273	0.743734
chr4	33400001	33480000	2.11861	2.27899	1.9433	1.89775
chr4	34560001	34680000	1.68252	1.82193	1.53789	1.75711
chr4	35160001	35280000	1.23883	1.1264	0.562278	0.522675
chr4	36160001	36200000	NA	NA	0.484437	0.533554
chr4	36320001	36400000	0.327211	0.313862	NA	NA
chr4	37320001	37440000	0.301271	0.456268	NA	NA
chr4	37520001	37640000	NA	NA	0.421081	0.21745
chr4	40080001	40160000	NA	NA	0.841301	0.798259
chr4	40680001	40760000	2.48857	2.44737	2.79477	2.37523
chr4	44200001	44280000	1.08976	1.14951	0.815081	0.923777
chr4	45040001	45120000	0.781156	0.913743	0.636361	0.635217
chr4	46160001	46320000	0.748373	0.856924	0.768651	0.796372
chr4	47480001	47520000	1.59615	1.63705	1.67945	1.55762
chr4	48520001	48600000	1.38856	1.54847	1.23669	1.20545
chr4	49680001	49720000	2.99529	3.252	1.89619	1.72392
chr4	50960001	51040000	NA	NA	0.426021	0.484319
chr4	52080001	52200000	0.584792	0.554476	0.723191	0.672263
chr4	53000001	53040000	1.68466	1.71283	0.905115	0.813088
chr4	53800001	53880000	2.17189	2.21016	1.97691	2.02479
chr4	55400001	55440000	2.1013	2.17589	1.48967	1.49327
chr4	56800001	56920000	1.52636	1.53651	1.40969	1.44571
chr4	58080001	58200000	0.810194	0.917462	0.80233	0.61037
chr4	58840001	58920000	2.34648	2.43327	1.63592	1.44308
chr4	59920001	60000000	3.37088	3.02971	2.38595	2.55006
chr4	60840001	60880000	NA	NA	0.396658	0.771394
chr4	61920001	62040000	1.26517	1.03309	1.15879	1.01547
chr4	63040001	63120000	1.84908	2.01253	1.26652	1.13659
chr4	64160001	64200000	1.40078	1.40866	1.39254	1.55019
chr4	65320001	65480000	1.00535	0.925998	0.609549	0.605268
chr4	66280001	66360000	1.6979	1.60954	1.55322	1.54092
chr4	67240001	67320000	0.144553	0.203211	NA	NA
chr4	68720001	68800000	0.628785	0.604666	0.499794	0.4652
chr4	70280001	70360000	1.06167	0.864474	0.568018	0.623032
chr4	71200001	71240000	0.345343	0.339768	NA	NA
chr4	72040001	72200000	0.910565	0.989801	0.749948	0.860751
chr4	73680001	73720000	NA	NA	0.344551	0.270421
chr4	74160001	74240000	0.787184	0.659018	0.665084	0.774352
chr4	75320001	75400000	0.600111	0.490357	0.439419	0.566156
chr4	76520001	76640000	0.64967	0.697105	0.507169	0.465564
chr4	77280001	77360000	1.67837	1.53201	1.61147	1.53069
chr4	80360001	80480000	1.71481	1.64095	0.834848	0.893794
chr4	81080001	81120000	0.816162	0.958584	1.24228	1.29562
chr4	82440001	82480000	0.748066	0.694072	NA	NA
chr4	82600001	82640000	NA	NA	0.729811	0.712391
chr4	83320001	83440000	1.40974	1.33643	1.28413	1.26333
chr4	84800001	84920000	0.81854	0.756195	0.51279	0.448816
chr4	85600001	85680000	0.510521	0.374809	0.491629	0.451646
chr4	86120001	86200000	0.926199	0.843991	0.480386	0.550101
chr4	86640001	86720000	1.51537	1.49354	1.27691	1.34737
chr4	88400001	88440000	2.10324	2.09345	2.3806	2.45383
chr4	89280001	89360000	1.46468	1.71131	1.21982	1.25695
chr4	90520001	90600000	0.248413	0.276271	0.299297	0.322892
chr4	91240001	91320000	0.361054	0.393078	0.51235	0.464206
chr4	91920001	92040000	0.248393	0.303963	0.175901	0.18269
chr4	92960001	93080000	0.402786	0.550355	0.206955	0.230794
chr4	94400001	94520000	NA	NA	2.35395	2.28648
chr4	94600001	94680000	2.21073	2.18642	NA	NA
chr4	95640001	95680000	3.8156	4.0314	3.51658	3.20588
chr4	96480001	96560000	0.803334	0.85806	0.802196	0.786953
chr4	97280001	97320000	2.03772	2.10856	1.7543	1.80945
chr4	98080001	98160000	1.15189	1.16025	0.930059	1.11021
chr4	98840001	98880000	0.822857	0.981035	1.20484	1.34369
chr4	99560001	99600000	2.09273	2.12602	1.67906	1.70828
chr4	100240001	100320000	0.833653	0.845585	0.640762	0.700646
chr4	101000001	101040000	0.863244	0.731935	0.547846	0.560074
chr4	101760001	101840000	0.33701	0.520395	0.697307	0.679151
chr4	102640001	102720000	0.502048	0.481952	0.579421	0.557264
chr4	104640001	104720000	3.01583	2.97945	2.04191	1.84081
chr4	106120001	106200000	1.97827	1.93697	2.49557	2.6645
chr4	106920001	107000000	0.556538	0.524289	0.62993	0.766563
chr4	107560001	107600000	0.321139	0.257306	NA	NA
chr4	107720001	107800000	NA	NA	0.105665	0.175543
chr4	109000001	109040000	0.461756	0.57802	NA	NA
chr4	109600001	109680000	1.34512	1.15487	1.59856	1.75969
chr4	111360001	111440000	1.42858	1.33054	1.24362	1.18241
chr4	112440001	112520000	0.57821	0.715572	0.368796	0.414078
chr4	113160001	113200000	0.531797	0.707706	0.327999	0.350917
chr4	113920001	114000000	1.02379	1.21737	1.1568	1.10493
chr4	114640001	114720000	3.17765	3.35598	2.03497	2.07883
chr4	115680001	115760000	1.77678	1.89845	1.61005	1.51949
chr4	116440001	116520000	0.874212	0.826744	1.0763	1.09369
chr4	117400001	117520000	0.26158	0.316345	0.375856	0.340403
chr4	118040001	118120000	0.698806	0.69626	0.816598	0.811236
chr4	118840001	118960000	1.4549	1.37261	0.931424	0.874634
chr4	120680001	120760000	1.03786	1.00982	0.995743	0.872342
chr4	122800001	122880000	0.335433	0.440272	NA	NA
chr4	123400001	123520000	1.37329	1.37558	1.54213	1.49233
chr4	124560001	124680000	3.18904	3.31151	2.137	2.1573
chr4	125720001	125760000	3.47378	3.38588	2.79656	2.83892
chr4	126840001	126920000	2.35688	2.37154	1.96693	1.92167
chr4	128560001	128680000	1.24045	1.30108	NA	NA
chr4	128800001	128840000	NA	NA	1.21981	0.736922
chr4	130360001	130440000	2.85277	2.76952	2.88433	2.72018
chr4	131480001	131600000	2.5138	2.32817	2.337	2.30516
chr4	133040001	133120000	0.582243	0.627748	0.693642	0.790857
chr4	135440001	135600000	0.539077	0.692993	0.72447	0.691952
chr4	137120001	137200000	0.782809	0.780338	0.495092	0.589054
chr4	137880001	137920000	1.31825	1.39426	1.85202	1.68466
chr4	138760001	138800000	NA	NA	0.691911	0.662331
chr4	138960001	139080000	1.50106	1.49697	NA	NA
chr4	140560001	140640000	0.99259	1.06	1.15413	1.15435
chr4	141480001	141560000	2.28089	2.26962	2.12913	2.33019
chr4	143000001	143120000	0.677221	0.535099	0.880391	0.694997
chr4	143960001	144040000	0.653899	0.578809	NA	NA
chr4	144200001	144240000	NA	NA	0.2539	0.237781
chr4	145040001	145160000	2.72956	2.97611	2.1374	2.86323
chr4	147120001	147240000	1.76671	1.72193	1.80035	1.73182
chr4	147920001	148000000	0.839553	1.00951	0.941196	0.987945
chr4	148880001	149000000	NA	NA	0.278634	0.187272
chr4	149520001	149680000	0.613811	0.435616	0.560574	0.415142
chr4	150400001	150440000	5.03326	4.67908	5.12295	4.66126
chr4	151280001	151320000	1.62892	1.67266	1.20836	1.32791
chr4	151760001	151800000	1.16325	1.17161	0.731146	0.900375
chr4	153160001	153280000	0.31732	0.43027	0.373764	0.380645
chr4	154360001	154440000	1.90569	1.88983	2.2477	2.32259
chr5	3680001	3800000	0.291467	0.435453	0.557569	0.306465
chr5	4000001	4120000	NA	NA	1.04042	0.936924
chr5	4920001	5000000	1.22537	1.07444	1.28135	1.14915
chr5	5760001	5840000	1.54042	1.4508	1.18034	1.09326
chr5	6520001	6720000	0.233551	0.199958	0.145251	0.193907
chr5	7160001	7200000	0.393879	0.313283	0.429634	0.32289
chr5	8240001	8320000	1.56731	1.45604	1.59486	1.64248
chr5	9240001	9360000	0.822942	0.923322	0.763045	0.712167
chr5	10560001	10640000	3.29292	3.31954	1.50993	1.61414
chr5	11800001	12000000	0.182202	0.309733	0.437238	0.413908
chr5	12480001	12560000	1.6286	1.70088	1.19732	1.22455
chr5	13600001	13640000	0.737964	0.7331	1.02654	0.961084
chr5	14320001	14400000	1.7476	1.78383	0.988242	1.0157
chr5	15120001	15200000	2.89851	2.92982	3.02406	2.9946
chr5	15840001	15960000	0.611379	0.655849	0.558073	0.560846
chr5	16440001	16480000	3.65055	3.66686	2.33582	2.36483
chr5	17320001	17400000	1.06967	1.065	1.37844	1.35107
chr5	17960001	18040000	1.22894	1.25387	0.54945	0.656908
chr5	18960001	19080000	1.40847	1.34294	0.675357	0.675913
chr5	20280001	20360000	1.46646	1.53392	1.08452	1.16106
chr5	21240001	21320000	1.36393	1.48101	1.24377	1.24839
chr5	22040001	22120000	1.1026	1.04303	0.926051	0.918198
chr5	22840001	22920000	2.32462	2.44459	1.91593	1.8895
chr5	23920001	24040000	0.528912	0.579566	0.369658	0.383178
chr5	24640001	24760000	0.438163	0.495514	0.537915	0.519935
chr5	27280001	27360000	0.397694	0.380304	0.263601	0.184913
chr5	28040001	28160000	0.968656	0.854653	0.873633	0.80108
chr5	29760001	29840000	1.96738	1.71499	1.94301	1.81944
chr5	30520001	30560000	0.468985	0.310222	NA	NA
chr5	31400001	31440000	1.48094	1.47034	1.09722	1.00191
chr5	33160001	33240000	0.935234	0.993043	1.17472	1.30277
chr5	33920001	34080000	0.37472	0.393329	0.485252	0.47927
chr5	35120001	35200000	0.791035	0.908125	1.12359	1.04906
chr5	35960001	36120000	0.60475	0.578866	0.691383	0.594085
chr5	37240001	37320000	1.71839	1.88469	1.89646	2.13757
chr5	39040001	39120000	1.50366	1.53327	1.30393	1.32692
chr5	39840001	39880000	NA	NA	0.225114	0.248919
chr5	39960001	40000000	0.494518	0.476048	NA	NA
chr5	40520001	40600000	0.535346	0.524745	0.484363	0.5919
chr5	41400001	41440000	1.49478	1.51563	0.694438	0.729625
chr5	42200001	42280000	1.88602	1.78023	1.5707	1.59515
chr5	42920001	43000000	0.233188	0.225157	0.541751	0.458146
chr5	43920001	44000000	1.5031	1.38953	1.48204	1.51358
chr5	44560001	44680000	0.770242	0.741124	0.887001	0.967855
chr5	45880001	45960000	2.3122	2.32916	2.11962	2.0961
chr5	46800001	46880000	2.06023	2.00676	1.44583	1.47171
chr5	47440001	47520000	0.987324	1.0238	0.836252	0.951206
chr5	48640001	48800000	1.41168	1.46863	0.973776	1.07081
chr5	49520001	49720000	0.703054	0.761558	0.5798	0.693692
chr5	50920001	51080000	0.581325	0.554174	0.541693	0.510586
chr5	52520001	52600000	0.83665	0.931446	0.674606	0.716364
chr5	53200001	53240000	1.14754	1.18719	1.18504	1.2767
chr5	54520001	54600000	1.96131	1.87534	1.33317	1.39591
chr5	55440001	55520000	0.275164	0.241425	0.404193	0.397246
chr5	56400001	56480000	0.374227	0.363189	0.309903	0.269439
chr5	57960001	58040000	1.67248	1.94153	1.66345	1.52428
chr5	59240001	59400000	0.684651	0.727369	0.511464	0.467987
chr5	60400001	60480000	0.195496	0.120218	NA	NA
chr5	62800001	62920000	0.652632	0.636042	0.859062	0.853418
chr5	63440001	63560000	NA	NA	0.431944	0.34756
chr5	64280001	64360000	2.18435	2.2721	1.87405	1.84161
chr5	65480001	65600000	0.865373	0.801895	0.971898	0.959522
chr5	67000001	67080000	1.00063	1.00719	1.23637	1.22232
chr5	67840001	68000000	0.425479	0.372631	0.312565	0.264014
chr5	68480001	68560000	1.74119	1.8883	1.81858	1.68144
chr5	70000001	70080000	1.63835	1.64706	1.07723	1.16904
chr5	71640001	71720000	NA	NA	0.489967	0.446605
chr5	71800001	71880000	0.83197	0.867554	NA	NA
chr5	72600001	72680000	1.73859	1.55534	1.19588	1.24107
chr5	73840001	73880000	1.09787	1.0852	0.886875	1.17527
chr5	74760001	74840000	0.557028	0.549885	0.517981	0.506883
chr5	75600001	75680000	1.32366	1.30344	0.988035	1.08782
chr5	76360001	76440000	0.572429	0.511059	0.442748	0.46101
chr5	77000001	77080000	0.608372	0.650686	0.788918	0.665922
chr5	77680001	77760000	1.14178	0.759652	1.253	1.1463
chr5	79000001	79120000	0.183349	0.15829	NA	NA
chr5	80840001	80920000	0.467651	0.403234	NA	NA
chr5	81840001	81880000	0.284835	0.284161	NA	NA
chr5	82760001	82880000	1.05375	1.06365	0.537314	0.543209
chr5	83920001	84000000	2.34145	2.40996	1.86304	1.73835
chr5	84960001	85000000	0.239048	0.232655	0.245292	0.256515
chr5	86480001	86520000	2.0682	1.99353	1.98412	1.82395
chr5	87120001	87200000	0.582811	0.607126	0.618738	0.538421
chr5	88080001	88120000	1.26224	1.13068	NA	NA
chr5	88240001	88280000	NA	NA	0.211787	0.181586
chr5	88960001	89000000	3.61044	3.76301	3.04925	3.22069
chr5	89920001	89960000	1.60201	1.5535	1.60189	1.51551
chr5	90640001	90720000	1.41493	1.3652	1.0001	0.960658
chr5	91320001	91400000	0.348546	0.603689	0.269516	0.283985
chr5	92720001	92800000	1.78765	1.77919	1.40842	1.41648
chr5	95800001	95880000	3.866	1.04401	3.70984	4.93277
chr5	96240001	96320000	2.63811	3.96603	1.47941	1.05089
chr5	97440001	97480000	1.98204	2.03773	2.10467	1.98063
chr5	98680001	98720000	1.63828	1.61822	1.42526	1.38844
chr5	99560001	99600000	0.824831	0.88198	0.83309	0.801503
chr5	101080001	101160000	2.11707	2.19092	1.78992	1.7975
chr5	102400001	102440000	NA	NA	2.04819	2.11379
chr5	104400001	104440000	1.31466	1.27201	0.781886	0.806531
chr5	104960001	105040000	NA	NA	0.460214	0.515068
chr5	105840001	105920000	NA	NA	0.536653	0.444008
chr5	106360001	106440000	1.52188	1.4939	1.29962	1.33712
chr5	107240001	107280000	1.40164	1.2919	1.05215	1.11849
chr5	108040001	108120000	1.18752	1.24411	1.43841	1.5567
chr5	109160001	109240000	2.72553	2.66225	2.05439	2.12543
chr5	109880001	110000000	0.355166	0.369146	0.28432	0.317653
chr5	110640001	110680000	2.03111	2.01235	1.69387	1.89482
chr5	111800001	111880000	2.395	2.26368	1.79549	1.65439
chr5	112760001	112920000	0.476327	0.346534	0.396586	0.54343
chr5	114280001	114360000	1.44121	1.18647	0.946545	0.84965
chr5	115040001	115120000	NA	NA	0.656119	0.482592
chr5	116040001	116120000	1.60447	1.6893	2.58315	2.39841
chr5	117480001	117520000	0.982411	0.957616	1.0093	1.07822
chr5	117880001	117960000	0.300006	0.358626	0.205081	0.107132
chr5	118480001	118560000	2.04563	1.85934	1.81946	1.94122
chr5	119240001	119280000	2.59003	2.4754	2.43469	2.36318
chr5	120840001	120960000	1.11742	1.09539	0.373902	0.501018
chr5	121680001	121800000	1.002	1.04134	1.61036	1.63069
chr5	122720001	122800000	0.509749	0.500222	0.255392	0.360069
chr5	123120001	123240000	NA	NA	0.229015	0.209973
chr5	123320001	123400000	0.392778	0.425614	NA	NA
chr5	124080001	124120000	NA	NA	0.120487	0.10506
chr5	124960001	125040000	1.3781	1.43805	1.5542	1.48654
chr5	125960001	126000000	4.53204	4.34301	5.03026	4.54512
chr5	127680001	127720000	NA	NA	1.01103	0.924646
chr5	127800001	127840000	0.276687	0.325931	NA	NA
chr5	128680001	128760000	NA	NA	0.38567	0.36405
chr5	129400001	129480000	0.485656	0.536587	0.566871	0.731755
chr5	130200001	130240000	1.69085	1.73885	1.50742	1.58963
chr5	130760001	130800000	2.50542	2.42362	1.95646	1.90644
chr5	131400001	131480000	0.254488	0.26293	0.137039	0.204321
chr5	131920001	131960000	1.23586	1.17902	1.25246	1.21173
chr5	132640001	132720000	0.469239	0.481185	NA	NA
chr5	133480001	133560000	0.248457	0.282804	0.250942	0.194662
chr5	134560001	134640000	3.27503	3.39751	2.6848	2.5936
chr5	136520001	136560000	1.34295	1.19426	1.12491	0.923009
chr5	137320001	137360000	NA	NA	0.783357	0.814442
chr5	137440001	137520000	0.851927	0.936062	NA	NA
chr5	138560001	138600000	1.88589	2.11886	1.86708	1.85838
chr5	139240001	139280000	0.563394	0.520254	0.778073	0.683732
chr5	139800001	139880000	0.840736	0.693316	0.830171	0.91732
chr5	141240001	141280000	3.05288	3.12524	2.599	2.78813
chr5	143120001	143160000	0.901995	1.09037	1.25831	1.3775
chr5	143640001	143680000	2.71764	2.43707	1.55203	2.55556
chr5	144840001	144920000	1.11541	1.20908	0.830604	0.930332
chr5	145960001	146040000	2.3217	1.875	1.98265	2.256
chr5	146840001	146920000	NA	NA	0.111629	0.183088
chr5	147400001	147480000	1.58707	1.51688	0.818845	0.865073
chr5	148240001	148360000	0.572498	0.594451	0.469082	0.646449
chr5	149000001	149160000	0.868105	0.885263	0.7639	0.934436
chr5	149600001	149760000	0.138207	0.132489	0.271497	0.316589
chr5	150280001	150400000	0.374943	0.405912	0.313057	0.210555
chr5	151360001	151400000	1.89112	1.7907	1.07368	1.0579
chr6	4440001	4480000	0.594115	0.532922	NA	NA
chr6	4560001	4600000	NA	NA	0.380307	0.392761
chr6	5640001	5720000	1.44432	1.52288	1.34293	1.36648
chr6	6880001	6960000	0.820358	0.812823	0.674215	0.569715
chr6	7600001	7680000	0.83652	0.716044	0.828783	0.906572
chr6	8800001	8880000	1.76283	1.78821	1.7544	1.61708
chr6	9920001	10040000	0.747567	0.766162	0.789906	0.82985
chr6	11200001	11280000	NA	NA	0.576527	0.552999
chr6	11440001	11520000	0.268847	0.236934	0.3453	0.293656
chr6	12240001	12280000	2.16106	2.17293	1.75184	1.75436
chr6	13160001	13240000	1.28165	1.23818	1.32393	1.21053
chr6	14520001	14600000	1.83723	1.72892	1.85121	1.71327
chr6	16120001	16200000	0.730856	0.811299	0.613679	0.68285
chr6	16920001	17000000	3.17707	3.29086	2.34496	2.47323
chr6	17600001	17680000	0.855796	0.931265	0.860642	0.819225
chr6	18840001	18960000	2.73021	2.70653	1.2044	1.23748
chr6	19560001	19680000	0.884956	0.775631	0.738898	0.782731
chr6	20600001	20680000	0.492348	0.463998	0.535467	0.542815
chr6	21600001	21720000	0.892029	0.842625	0.578837	0.658935
chr6	23000001	23120000	1.06952	1.14615	0.856467	0.809896
chr6	24480001	24520000	1.64479	1.59185	1.37046	1.36064
chr6	25800001	25840000	1.21759	1.18684	0.675458	0.711875
chr6	27440001	27520000	0.200918	0.285875	NA	NA
chr6	28240001	28320000	2.27875	2.20577	2.20426	2.2023
chr6	29200001	29240000	2.22263	2.10511	1.54001	1.56515
chr6	30280001	30360000	0.753813	0.797748	0.316774	0.303465
chr6	31520001	31560000	3.07998	3.05636	2.94835	3.07238
chr6	32440001	32600000	0.43022	0.430555	0.307549	0.306083
chr6	33160001	33240000	0.900042	0.941241	0.926705	0.882685
chr6	34320001	34360000	1.7484	1.72711	1.10022	1.04583
chr6	35160001	35200000	1.69082	1.74833	1.66485	1.64239
chr6	36160001	36240000	0.255106	0.193858	0.134578	0.229279
chr6	37080001	37120000	NA	NA	0.835074	0.894928
chr6	37240001	37320000	0.984826	1.09121	NA	NA
chr6	38360001	38400000	1.68092	1.70435	1.98359	2.05873
chr6	39600001	39640000	1.5484	1.33553	1.62597	1.7164
chr6	40560001	40720000	0.300157	0.341935	0.523799	0.512908
chr6	41640001	41680000	0.530922	0.617305	NA	NA
chr6	42120001	42200000	0.59486	0.726257	0.568687	0.598096
chr6	43200001	43280000	1.02301	1.07093	0.640579	0.63804
chr6	45000001	45040000	0.838274	0.810323	0.680253	0.770888
chr6	46320001	46360000	0.18172	0.180053	NA	NA
chr6	46440001	46520000	NA	NA	0.392231	0.375847
chr6	47800001	47880000	1.99812	1.89291	1.64687	1.75973
chr6	49360001	49440000	1.20743	1.20139	1.23809	1.21065
chr6	50680001	50760000	0.857876	0.918008	0.791482	0.84754
chr6	52120001	52160000	0.704825	0.684147	0.597001	0.521182
chr6	52960001	53040000	1.62961	1.616	1.54243	1.53964
chr6	53720001	53800000	0.740116	0.779747	0.959827	1.02183
chr6	54440001	54520000	1.03101	1.11552	0.952385	1.03461
chr6	55240001	55320000	1.41847	1.45877	0.821828	0.842474
chr6	56000001	56040000	0.18041	0.179069	NA	NA
chr6	56560001	56600000	1.13675	1.01813	1.01882	1.14459
chr6	57440001	57480000	0.322584	0.255161	NA	NA
chr6	57960001	58000000	0.356365	0.38963	0.585341	0.577597
chr6	58520001	58560000	0.414082	0.499291	NA	NA
chr6	59200001	59280000	0.998859	1.06494	0.751522	0.767485
chr6	60160001	60240000	0.33944	0.355888	NA	NA
chr6	61200001	61280000	0.606711	0.701355	0.704532	0.732441
chr6	61880001	61960000	0.104142	0.206998	NA	NA
chr6	62360001	62400000	0.527279	0.429523	NA	NA
chr6	63200001	63280000	0.324149	0.268018	0.377207	0.346298
chr6	64720001	64760000	1.65276	1.67608	1.51189	1.67757
chr6	65400001	65440000	0.513821	0.524953	NA	NA
chr6	66560001	66640000	1.27235	1.26623	1.08129	1.03492
chr6	67520001	67680000	1.0615	1.13882	0.67697	0.857956
chr6	68640001	68720000	0.448088	0.372626	0.351814	0.371095
chr6	69560001	69640000	0.631508	0.691171	0.389485	0.39269
chr6	70720001	70760000	1.31449	1.2715	1.00196	0.994076
chr6	71800001	71840000	NA	NA	0.827417	0.880424
chr6	72520001	72560000	0.705483	0.859825	1.11198	1.05398
chr6	73240001	73320000	1.34551	1.29149	1.18201	1.18144
chr6	74520001	74640000	NA	NA	0.103817	0.141457
chr6	76280001	76440000	0.59762	0.600743	0.535467	0.581598
chr6	77440001	77560000	1.49908	1.51087	1.20267	1.22631
chr6	78440001	78480000	2.07061	1.99607	2.17692	2.03207
chr6	80640001	80760000	0.403661	0.460233	0.469363	0.431141
chr6	81840001	81880000	1.74971	1.88492	1.60592	1.55312
chr6	82960001	83000000	1.17989	1.3487	0.959265	1.02393
chr6	83560001	83720000	NA	NA	0.577313	0.537635
chr6	85120001	85280000	1.29045	1.23008	1.20551	1.1831
chr6	86360001	86440000	NA	NA	0.308788	0.190725
chr6	86920001	87000000	1.2663	1.08904	2.13365	2.00842
chr6	87720001	87760000	0.722802	0.776963	0.466108	0.501896
chr6	88600001	88800000	0.889464	0.906496	0.637199	0.67221
chr6	89600001	89640000	2.14859	2.10223	2.06291	2.05566
chr6	90520001	90560000	1.98689	2.05122	2.29213	2.19301
chr6	91400001	91480000	0.590418	0.602309	0.858134	0.898114
chr6	92720001	92800000	1.80839	1.77235	1.59711	1.63515
chr6	93680001	93800000	1.19703	1.06616	1.11924	1.10177
chr6	94480001	94520000	0.29427	0.315954	NA	NA
chr6	95000001	95040000	2.19519	2.19355	1.70235	1.56445
chr6	96000001	96120000	0.370098	0.434422	0.46405	0.471425
chr6	97000001	97040000	2.13239	2.1063	1.70751	1.66524
chr6	98080001	98200000	0.583121	0.538822	0.66896	0.651183
chr6	98760001	98840000	NA	NA	0.52031	0.483629
chr6	99560001	99600000	2.61689	2.54445	2.83187	2.83688
chr6	100600001	100680000	1.04841	1.01525	NA	NA
chr6	100920001	101000000	NA	NA	0.944951	0.935527
chr6	101600001	101640000	0.956681	1.03894	0.782191	0.822055
chr6	103200001	103240000	0.66378	0.677926	0.468736	0.437006
chr6	103760001	103840000	1.46631	1.46113	1.47239	1.52313
chr6	104920001	105000000	NA	NA	0.415381	0.422672
chr6	105080001	105120000	0.207702	0.218065	NA	NA
chr6	105520001	105600000	0.660548	0.668636	0.564263	0.563185
chr6	106640001	106680000	2.22487	2.1768	1.88512	1.84791
chr6	108040001	108080000	2.02973	2.01289	1.9453	2.00401
chr6	108760001	108840000	2.36253	2.33798	1.3159	1.40545
chr6	109600001	109720000	0.211388	0.193614	0.388776	0.259217
chr6	110640001	110840000	0.334182	0.419313	0.345734	0.277658
chr6	112120001	112160000	0.576267	0.614088	NA	NA
chr6	113600001	113680000	2.04331	2.18373	1.94183	1.86561
chr6	114600001	114640000	1.28771	1.37087	NA	NA
chr6	114840001	114880000	NA	NA	0.569024	0.737352
chr6	115760001	115800000	NA	NA	0.777201	0.762232
chr6	116360001	116400000	NA	NA	0.664145	0.591349
chr6	117720001	117800000	1.08797	1.08424	1.17247	1.1198
chr6	118480001	118520000	0.657707	0.58436	0.761354	0.760498
chr6	119360001	119440000	1.67427	1.76972	1.77743	1.81398
chr6	121120001	121240000	1.56361	1.48798	1.42736	1.43027
chr6	122520001	122560000	0.66522	0.735974	0.75639	0.681371
chr6	124520001	124600000	1.7327	1.6593	1.19241	1.14879
chr6	125320001	125360000	1.75919	1.63979	1.30461	1.42094
chr6	126720001	126760000	1.02009	1.06508	1.16332	1.16409
chr6	127960001	128080000	1.46717	1.21544	0.808181	0.724833
chr6	128520001	128560000	NA	NA	0.801976	0.840487
chr6	129400001	129480000	1.51199	1.63096	1.2374	1.09296
chr6	130400001	130480000	0.361967	0.363093	0.242735	0.324044
chr6	131400001	131480000	2.71804	2.8009	2.00392	1.90791
chr6	132440001	132560000	0.493458	0.607882	0.428304	0.352569
chr6	133160001	133280000	0.309593	0.395371	0.414675	0.338776
chr6	133840001	133880000	1.4365	1.5691	1.93398	1.96052
chr6	135040001	135080000	0.763009	0.77514	0.892496	1.0053
chr6	136800001	136880000	0.867257	0.90188	0.932224	0.963072
chr6	137600001	137720000	0.630657	0.723288	0.730587	0.827938
chr6	138320001	138480000	0.173163	0.191602	0.369792	0.43878
chr6	139480001	139520000	1.18269	1.26731	0.946446	1.02052
[truncated: 533 more rows]
