# Supplementary material for: The nuclear matrix protein HNRNPU maintains 3D genome architecture globally in mouse hepatocytes
Source: HighWire-hosted journal article supplement (doi:10.1101/gr.224576.117), 2017-12-22
Supplement: Supplemental_Table_S5.xlsx [file Supplemental_Table_S5.xlsx]

## Sheet: loops
Supplemental Table S5 Statistics of loops and their neighboring regions generated with HiCCUPS.
loop location (mm9)							shCtrl										shU
index	chr_1	start_1	end_1	chr_2	start_2	end_2	shCtrl_observed	shCtrl_expectedBL	shCtrl_expectedDonut	shCtrl_expectedH	shCtrl_expectedV	shCtrl_BL_fold	shCtrl_Dount_fold	shCtrl_H_fold	shCtrl_V_fold	shCtrl_obs／exp	shU_observed	shU_expectedBL	shU_expectedDonut	shU_expectedH	shU_expectedV	shU_BL_fold	shU_Dount_fold	shU_H_fold	shU_V_fold	shU_obs_exp
all_loops_1	chr1	101670000	101680000	chr1	102110000	102120000	75	15.7163	19.8903	26.4158	21.1495	4.74827	3.75682	2.83227	3.53421	10.7265	48	15.9091	18.9053	22.6352	19.6965	3.00454	2.53087	2.11566	2.42973	7.12005
all_loops_2	chr1	101760000	101770000	chr1	151190000	151200000	19	0.408706	0.252708	1.82094	0.29894	37.5462	54.1525	9.94303	47.8769	135.385	28	0.223591	0.253544	1.05488	0.133598	86.8379	79.4809	24.3315	120.292	151.979
all_loops_3	chr1	10210000	10220000	chr1	10420000	10430000	135	49.7667	43.1309	51.6284	51.3391	2.70922	3.12508	2.61172	2.62641	6.21225	80	39.6848	37.5828	45.1583	40.8927	2.01333	2.12564	1.76984	1.95401	3.90138
all_loops_4	chr1	10210000	10220000	chr1	10750000	10760000	71	27.6954	25.9818	27.4999	35.1252	2.55798	2.72604	2.57609	2.01844	6.93796	69	29.3331	25.0782	27.4377	40.961	2.3477	2.74444	2.50928	1.68286	6.63289
all_loops_5	chr1	105070000	105080000	chr1	113350000	113360000	18	0.43291	0.443416	1.19898	0.0255831	33.9645	33.3078	13.934	144.128	106.258	25	0.593235	0.562581	1.30831	0.983552	36.2071	37.8822	17.8228	23.1646	104.876
all_loops_6	chr1	105690000	105700000	chr1	106870000	106880000	79	21.4409	11.7317	18.3316	12.4181	3.67208	6.68544	4.29155	6.31885	29.7131	33	9.81539	6.86886	10.8339	6.63863	3.33825	4.7497	3.02728	4.91198	11.3172
all_loops_7	chr1	105690000	105700000	chr1	107530000	107540000	22	4.83644	3.42538	5.01424	3.85299	4.47691	6.26883	4.32127	5.5907	17.3278	6	3.5444	2.61733	4.99221	2.49055	1.6738	2.24485	1.19791	2.35471	3.9074
all_loops_8	chr1	106880000	106890000	chr1	106980000	106990000	80	42.1889	33.3282	36.5448	27.9817	1.89411	2.39618	2.18585	2.85239	1.97597	29	30.2525	26.799	26.4382	25.9622	0.958734	1.08182	1.09653	1.11656	0.890996
all_loops_9	chr1	106880000	106890000	chr1	107250000	107260000	59	19.2559	20.0282	23.6048	22.2933	3.05334	2.93618	2.49316	2.63918	5.4819	30	21.6346	20.0717	22.3485	20.1486	1.38489	1.49219	1.34085	1.48652	3.21534
all_loops_10	chr1	106880000	106890000	chr1	107520000	107530000	125	25.0435	17.9739	25.9208	22.2038	4.97544	6.92159	4.80769	5.6089	19.9936	98	19.8985	16.5943	25.7125	23.9911	4.90536	5.87625	3.80049	4.07204	15.9844
all_loops_11	chr1	106980000	106990000	chr1	107520000	107530000	51	14.3941	15.7663	17.768	17.9747	3.52558	3.22065	2.85987	2.82716	7.00857	19	14.3526	12.532	13.6595	16.8259	1.32156	1.51204	1.38813	1.12845	2.76443
all_loops_12	chr1	106990000	107000000	chr1	107250000	107260000	68	26.8048	28.844	36.5256	32.3991	2.53114	2.35282	1.85936	2.09544	4.73061	41	21.6338	24.6553	27.2425	26.9983	1.89106	1.66025	1.50315	1.5167	3.35473
all_loops_13	chr1	107640000	107650000	chr1	107910000	107920000	61	24.1785	27.5576	29.7734	37.0979	2.51663	2.20916	2.0453	1.64257	3.82866	46	25.6503	29.9568	30.5691	39.5771	1.79027	1.53377	1.50314	1.16188	2.80627
all_loops_14	chr1	107780000	107790000	chr1	107890000	107900000	117	54.5055	54.1092	76.4378	54.4187	2.14447	2.16015	1.52996	2.14789	3.49074	103	48.5719	50.6144	77.1949	47.2393	2.11826	2.03295	1.33385	2.17789	3.42255
all_loops_15	chr1	107960000	107970000	chr1	108290000	108300000	127	44.8859	30.3615	39.8051	38.179	2.82533	4.17248	3.18506	3.32036	10.7403	122	42.065	28.6774	35.9299	34.0621	2.89577	4.24291	3.38886	3.57414	10.7577
all_loops_16	chr1	108060000	108070000	chr1	108270000	108280000	134	64.3508	59.7089	71.8698	76.5398	2.08066	2.24214	1.86328	1.74974	4.80552	125	61.319	58.6556	69.1956	72.788	2.03683	2.12916	1.80531	1.71633	4.71494
all_loops_17	chr1	10820000	10830000	chr1	11120000	11130000	116	29.1751	24.868	35.3326	28.1112	3.96582	4.64994	3.27665	4.11539	10.9694	94	23.5593	20.9126	27.9676	23.1651	3.97729	4.47825	3.35262	4.04468	9.48024
all_loops_18	chr1	108320000	108330000	chr1	108610000	108620000	101	21.09	19.9816	26.8722	24.8724	4.77112	5.03445	3.7483	4.04847	9.50651	103	19.5627	22.0123	26.6536	28.9439	5.24344	4.66257	3.85368	3.5498	10.0711
all_loops_19	chr1	108400000	108410000	chr1	108610000	108620000	144	43.611	40.3558	36.6568	64.4958	3.29665	3.56191	3.92036	2.23079	7.72194	115	40.6951	37.7964	36.0966	57.2205	2.82141	3.03723	3.17986	2.00801	6.84835
all_loops_20	chr1	108520000	108530000	chr1	108600000	108610000	175	77.39	76.6527	78.9162	93.7741	2.25965	2.28135	2.216	1.86526	3.0058	118	74.0078	71.3771	68.5215	81.5183	1.59363	1.65228	1.72103	1.44698	2.33133
all_loops_21	chr1	109000000	109010000	chr1	109110000	109120000	65	18.0888	17.7791	16.1123	18.2302	3.57913	3.64112	4.01546	3.55152	2.88624	71	20.2323	18.9555	15.3199	19.1291	3.49689	3.73121	4.61091	3.69752	2.96118
all_loops_22	chr1	109020000	109030000	chr1	109370000	109380000	28	9.42998	8.28282	8.90463	9.55727	2.94859	3.35209	3.12062	2.90973	4.40025	15	8.53478	7.59921	7.24157	7.73575	1.74874	1.96124	2.05678	1.92707	2.17273
all_loops_23	chr1	109030000	109040000	chr1	109140000	109150000	37	14.4974	15.2733	15.3394	12.24	2.54154	2.41328	2.40294	3.00648	2.12919	25	14.4913	14.3855	13.2914	10.8695	1.72021	1.73276	1.87433	2.28816	1.49753
all_loops_24	chr1	109140000	109150000	chr1	109370000	109380000	96	20.5817	20.7666	25.2167	23.7292	4.64662	4.60545	3.79591	4.03287	6.7285	65	18.3789	18.154	23.0191	18.1525	3.52293	3.56635	2.81585	3.56664	4.35398
all_loops_25	chr1	109530000	109540000	chr1	110720000	110730000	118	26.9889	25.4203	29.7929	30.1283	4.35972	4.62769	3.95078	3.90693	28.9375	42	16.1644	15.2995	18.051	15.0324	2.58848	2.73386	2.31943	2.78212	10.6397
all_loops_26	chr1	109530000	109540000	chr1	112380000	112390000	27	6.04447	6.81758	6.84702	8.68999	4.41047	3.91756	3.90095	3.08305	29.2604	15	6.0975	6.45771	5.56946	8.01056	2.43647	2.30263	2.66339	1.86177	13.5966
all_loops_27	chr1	109610000	109620000	chr1	110720000	110730000	46	12.0748	15.0127	14.2218	18.0557	3.78652	3.05042	3.21887	2.53915	14.054	17	9.52538	10.3928	9.8049	9.416	1.77655	1.62969	1.72642	1.79697	5.61389
all_loops_28	chr1	11050000	11060000	chr1	11120000	11130000	81	41.3239	39.7864	41.6339	44.9002	1.95781	2.03327	1.94327	1.80221	2.32367	43	34.0742	33.9428	31.4979	34.9129	1.26119	1.26605	1.36401	1.23098	1.38624
all_loops_29	chr1	113550000	113560000	chr1	113750000	113760000	71	26.7456	21.5689	24.7372	19.6644	2.64848	3.28119	2.86264	3.59737	3.1923	51	21.7786	17.5505	20.7199	14.9387	2.33562	2.8951	2.45438	3.39791	2.23065
all_loops_30	chr1	113550000	113560000	chr1	114270000	114280000	106	15.8629	18.4569	25.0786	20.439	6.64666	5.71755	4.21389	5.16578	19.2514	75	13.5126	15.5162	19.0992	16.8443	5.51693	4.80912	3.91163	4.43218	12.7722
all_loops_31	chr1	113760000	113770000	chr1	114270000	114280000	153	29.5428	29.1959	33.1645	36.0395	5.16482	5.226	4.6025	4.23637	19.4157	115	25.5064	25.5745	27.3936	33.2147	4.49496	4.48304	4.18642	3.45494	14.5514
all_loops_32	chr1	114280000	114290000	chr1	114340000	114350000	73	33.6533	27.5101	25.9995	30.9619	2.16571	2.64758	2.80082	2.35336	1.82156	34	31.8598	25.1335	21.0481	26.5085	1.06696	1.35138	1.61244	1.28155	0.896414
all_loops_33	chr1	11640000	11650000	chr1	12820000	12830000	46	6.91367	6.79584	8.04526	8.73135	6.57288	6.68519	5.65973	5.22004	46.5675	30	5.32711	5.54881	6.17289	7.34179	5.54623	5.32855	4.79843	4.04472	29.9206
all_loops_34	chr1	117210000	117220000	chr1	117270000	117280000	99	47.8287	43.4936	43.5944	41.0941	2.06766	2.27327	2.26803	2.40568	1.81591	76	51.5613	47.6979	48.3734	45.1558	1.47306	1.59212	1.56993	1.68155	1.3955
all_loops_35	chr1	117580000	117590000	chr1	118200000	118210000	68	23.588	21.9931	29.2998	24.7586	2.87487	3.0824	2.31634	2.73949	8.70377	40	16.9705	17.0112	19.6299	18.7523	2.34909	2.3435	2.03245	2.12706	5.01419
all_loops_36	chr1	117580000	117590000	chr1	118370000	118380000	52	15.1792	14.9187	19.6841	17.0149	3.40987	3.46901	2.63342	3.04413	11.3771	26	12.267	12.1916	15.2318	11.1191	2.11046	2.1234	1.70235	2.32639	5.49415
all_loops_37	chr1	118690000	118700000	chr1	173740000	173750000	20	0.0593772	0.0499116	0.62129	0.0460293	126.116	134.079	27.8667	137.644	613.808	18	0.0578019	0.0506843	0.727954	0.0422294	114.701	120.119	21.8611	127.259	491.064
all_loops_38	chr1	120230000	120240000	chr1	120390000	120400000	61	25.8107	18.9495	26.0559	19.161	2.3581	3.20744	2.33599	3.17221	4.69759	55	28.1722	22.3708	30.7116	26.0308	1.94891	2.45208	1.78829	2.10862	4.18513
all_loops_39	chr1	120460000	120470000	chr1	120650000	120660000	119	25.5857	20.716	22.4556	33.2927	4.63682	5.72155	5.28029	3.56665	7.80572	86	25.5879	19.7945	21.2495	35.3507	3.35177	4.32782	4.03289	2.42873	5.80524
all_loops_40	chr1	120660000	120670000	chr1	120970000	120980000	114	26.4593	19.6771	18.7272	22.9272	4.29604	5.76929	6.06039	4.95502	11.7273	76	23.538	16.2684	17.795	20.2451	3.21939	4.64921	4.2526	3.74045	8.33721
all_loops_41	chr1	120980000	120990000	chr1	121320000	121330000	74	14.7726	13.2981	23.8262	16.5092	4.98232	5.53065	3.09702	4.46139	13.3547	58	16.0189	13.5605	24.1258	16.7032	3.60445	4.25313	2.39827	3.45767	9.74165
all_loops_42	chr1	121450000	121460000	chr1	121560000	121570000	113	49.1151	51.7514	65.0409	60.9358	2.29808	2.18123	1.73624	1.85301	3.24366	109	48.0359	50.9039	65.6868	61.7071	2.2665	2.13905	1.65839	1.76517	3.32018
all_loops_43	chr1	121700000	121710000	chr1	121900000	121910000	58	28.6884	25.3412	26.7519	28.5629	2.01817	2.2837	2.16372	2.02701	2.20098	30	28.1423	24.613	25.6376	29.3248	1.06578	1.21798	1.1695	1.02295	1.26014
all_loops_44	chr1	121710000	121720000	chr1	121780000	121790000	136	59.581	61.9597	65.9905	76.5324	2.28046	2.19305	2.0593	1.77601	2.94045	56	44.2499	49.4921	52.4597	59.1438	1.26494	1.13123	1.06736	0.946934	1.28441
all_loops_45	chr1	121710000	121720000	chr1	121820000	121830000	103	50.3322	46.3186	58.2791	43.2379	2.04433	2.22109	1.76604	2.37898	3.01648	78	41.0745	38.7623	40.4522	38.2979	1.8968	2.00966	1.92591	2.03397	2.37901
all_loops_46	chr1	121920000	121930000	chr1	121980000	121990000	157	68.4507	64.8102	80.4472	74.8767	2.29173	2.42027	1.95041	2.09532	3.03015	161	55.2649	54.7178	68.222	61.8594	2.90979	2.93883	2.35795	2.60009	3.44519
all_loops_47	chr1	121920000	121930000	chr1	122040000	122050000	77	33.1355	29.6794	46.8608	35.0268	2.31981	2.58904	1.6418	2.1949	2.75338	56	31.1244	26.4667	41.1231	27.6187	1.79667	2.11167	1.36089	2.0239	2.28239
all_loops_48	chr1	121990000	122000000	chr1	122040000	122050000	123	61.348	49.2298	52.6051	63.3926	2.00332	2.49545	2.33564	1.93881	2.63517	107	49.7151	42.9645	43.5215	51.3975	2.14995	2.48697	2.45521	2.07971	2.48185
all_loops_49	chr1	122070000	122080000	chr1	122440000	122450000	49	17.9888	12.6401	13.8503	22.8636	2.71439	3.85399	3.51963	2.13816	5.83339	56	19.3578	14.5035	16.4251	25.3034	2.88316	3.84156	3.39484	2.20837	6.14712
all_loops_50	chr1	122120000	122130000	chr1	122180000	122190000	110	49.2044	50.7885	49.6138	62.3092	2.23307	2.16355	2.21467	1.76416	2.34623	98	48.9114	51.8693	56.1081	57.4565	2.00158	1.88765	1.7453	1.70441	2.11266
all_loops_51	chr1	122220000	122230000	chr1	122440000	122450000	109	20.8158	19.4719	21.2763	27.5663	5.21615	5.57431	5.10379	3.94343	8.56137	58	19.7053	17.6879	20.9666	21.3173	2.93357	3.26626	2.75792	2.71276	4.72979
all_loops_52	chr1	122480000	122490000	chr1	123070000	123080000	77	13.3626	16.0259	21.6161	17.3158	5.72696	4.78114	3.55036	4.42703	19.7891	83	14.0519	13.9223	19.7286	18.0516	5.87198	5.92626	4.19092	4.57812	19.7113
all_loops_53	chr1	122480000	122490000	chr1	123290000	123300000	36	8.19836	8.13963	9.36234	10.397	4.35026	4.38127	3.81513	3.43907	12.4078	33	10.2264	8.39233	11.1701	10.2991	3.20537	3.89763	2.93697	3.18298	10.2977
all_loops_54	chr1	122490000	122500000	chr1	122580000	122590000	67	26.0975	24.293	28.1597	28.8845	2.56131	2.75078	2.3744	2.31503	2.64131	81	26.1717	26.3679	31.2728	32.4805	3.08698	3.06409	2.58504	2.48922	3.15321
all_loops_55	chr1	123140000	123150000	chr1	123290000	123300000	131	25.4746	24.2794	26.3141	32.2354	5.12617	5.3775	4.96326	4.05438	6.46678	92	22.6718	23.0954	22.5849	36.7663	4.04448	3.97062	4.05998	2.49821	4.61545
all_loops_56	chr1	126190000	126200000	chr1	126410000	126420000	57	25.469	25.0471	24.1682	30.5013	2.23317	2.27064	2.35287	1.86593	3.4803	21	16.7639	18.1126	17.39	20.4597	1.25119	1.15854	1.20641	1.02628	1.44106
all_loops_57	chr1	127320000	127330000	chr1	127460000	127470000	79	34.2477	36.8612	45.0621	48.2297	2.30292	2.14008	1.75147	1.63667	2.55235	72	34.1565	37.7657	46.3672	48.9292	2.10471	1.9041	1.55163	1.47055	2.35467
all_loops_58	chr1	127410000	127420000	chr1	127460000	127470000	184	68.8802	62.2227	70.0777	68.1362	2.66888	2.95398	2.62334	2.69798	2.855	185	65.3734	60.7735	69.3353	66.5858	2.8271	3.04073	2.66579	2.7757	3.06108
all_loops_59	chr1	127410000	127420000	chr1	127570000	127580000	61	15.3416	18.742	19.009	26.9463	3.95686	3.24276	3.19744	2.25909	2.40964	32	12.0338	16.6456	19.3794	21.6452	2.64549	1.91693	1.64789	1.47619	1.45739
all_loops_60	chr1	127500000	127510000	chr1	127570000	127580000	110	52.908	48.2269	55.2499	46.8479	2.07704	2.27823	1.98916	2.34515	2.34029	97	49.153	44.1267	51.5278	41.7417	1.97145	2.19551	1.88077	2.32065	2.29865
all_loops_61	chr1	127500000	127510000	chr1	128330000	128340000	38	12.1422	9.19583	12.6577	10.2761	3.11219	4.09861	2.98643	3.6719	14.2939	23	11.688	9.23492	11.248	10.7401	1.95961	2.47458	2.03561	2.13097	7.89713
all_loops_62	chr1	127680000	127690000	chr1	128820000	128830000	24	5.71455	6.29877	6.05219	7.63706	4.14478	3.76635	3.9173	3.11488	11.1542	17	6.48957	6.66219	6.85284	10.9021	2.59501	2.52877	2.45943	1.55424	6.76274
all_loops_63	chr1	128620000	128630000	chr1	128820000	128830000	41	15.3621	16.5959	17.7785	17.9698	2.65812	2.46168	2.29885	2.27451	2.48978	31	17.38	18.3737	19.9922	19.5803	1.77917	1.68347	1.54786	1.58026	1.8308
all_loops_64	chr1	129090000	129100000	chr1	129350000	129360000	115	37.9719	31.2852	45.1347	32.749	3.02322	3.66733	2.54451	3.50391	7.18667	126	33.9931	28.6926	40.8891	31.5848	3.6987	4.37961	3.07643	3.97982	8.48542
all_loops_65	chr1	129100000	129110000	chr1	129300000	129310000	81	28.9733	33.007	47.8108	31.4206	2.7895	2.44963	1.69273	2.57292	4.74754	62	28.1408	32.8327	53.4	28.4129	2.19895	1.88567	1.16075	2.17796	3.95918
all_loops_66	chr1	129390000	129400000	chr1	129650000	129660000	95	21.3604	15.1807	23.4912	16.973	4.43143	6.22353	4.03116	5.57021	8.70628	57	18.6473	13.1816	17.2968	17.2919	3.04576	4.29917	3.28222	3.28314	5.67356
all_loops_67	chr1	129600000	129610000	chr1	129650000	129660000	121	68.0713	54.2223	59.6966	63.5162	1.77641	2.22929	2.0252	1.9036	2.08311	56	49.9566	42.9408	45.9071	47.9898	1.12073	1.30341	1.21938	1.16657	1.12937
all_loops_68	chr1	129720000	129730000	chr1	130040000	130050000	70	31.6804	32.0209	36.1269	34.0943	2.20577	2.18238	1.93502	2.05005	4.73249	73	35.0461	38.2912	43.5347	40.1582	2.07989	1.90408	1.67527	1.81578	4.77951
all_loops_69	chr1	130260000	130270000	chr1	130720000	130730000	144	19.6573	16.3555	18.5985	29.132	7.29349	8.75697	7.7065	4.92954	17.7182	103	14.6244	14.4082	17.716	26.7881	7.00198	7.10633	5.78692	3.83441	12.4438
all_loops_70	chr1	13040000	13050000	chr1	13120000	13130000	130	35.0687	29.9418	35.2069	33.4372	3.69931	4.33063	3.68483	3.87927	4.63402	125	34.7304	28.5124	36.5592	34.636	3.59169	4.37223	3.41251	3.60145	4.89764
all_loops_71	chr1	130770000	130780000	chr1	132260000	132270000	23	5.00935	4.35463	5.71213	4.52438	4.52113	5.18561	3.97445	4.99526	29.1403	17	6.84819	5.09821	7.39387	5.86794	2.46107	3.28959	2.28187	2.86531	17.214
all_loops_72	chr1	131380000	131390000	chr1	131720000	131730000	54	16.1882	14.5083	16.7377	16.1377	3.32141	3.70338	3.21303	3.33175	6.37292	22	11.8583	12.1966	13.0356	13.6903	1.84809	1.79725	1.68245	1.60257	2.45173
all_loops_73	chr1	131380000	131390000	chr1	132080000	132090000	34	10.3289	9.36256	10.4863	9.81638	3.26977	3.60368	3.22115	3.43876	8.62426	22	9.2675	8.62324	9.57459	9.30739	2.35922	2.53346	2.28433	2.34922	5.03216
all_loops_74	chr1	131390000	131400000	chr1	132240000	132250000	36	10.7342	11.2606	13.0522	12.7918	3.33204	3.17764	2.74478	2.80023	8.68689	27	11.0369	10.949	13.1074	12.5705	2.43335	2.45272	2.05189	2.13882	5.93329
all_loops_75	chr1	13140000	13150000	chr1	13510000	13520000	67	17.8774	18.4783	24.8068	21.4521	3.73246	3.61175	2.69404	3.11339	10.1322	49	16.6094	18.9267	26.3242	20.2845	2.93846	2.58058	1.85815	2.40869	7.12093
all_loops_76	chr1	132470000	132480000	chr1	132680000	132690000	40	10.3426	14.072	14.9216	18.7051	3.84003	2.82953	2.66949	2.1324	2.34516	31	8.83281	12.0386	12.8797	17.3928	3.48155	2.56207	2.39605	1.77787	1.89383
all_loops_77	chr1	132590000	132600000	chr1	132670000	132680000	111	46.6558	42.2315	44.3903	58.2963	2.37618	2.62452	2.49717	1.90252	3.39175	82	49.6323	44.413	40.9835	53.9102	1.65084	1.8444	1.99837	1.52008	2.6276
all_loops_78	chr1	132680000	132690000	chr1	132870000	132880000	70	27.7538	24.3625	31.2483	27.292	2.51672	2.86561	2.23617	2.55915	3.62985	41	22.8745	21.4246	23.6485	24.8654	1.78894	1.90944	1.73063	1.64628	2.27143
all_loops_79	chr1	132770000	132780000	chr1	132870000	132880000	136	42.2662	45.9374	54.9981	47.3316	3.21246	2.95629	2.47014	2.86939	4.62102	120	37.7817	42.6783	50.8432	45.0932	3.1704	2.8075	2.35753	2.65748	4.18493
all_loops_80	chr1	132770000	132780000	chr1	132950000	132960000	75	31.0363	26.978	35.5879	30.6884	2.41198	2.77347	2.10435	2.43923	4.2414	92	29.5581	26.8637	36.2094	24.8986	3.10539	3.4157	2.53654	3.6842	5.14753
all_loops_81	chr1	133180000	133190000	chr1	133450000	133460000	125	45.2606	34.2267	39.1751	49.9136	2.7579	3.6444	3.18522	2.50132	7.8566	102	57.4847	38.6422	36.8502	59.6879	1.77304	2.63537	2.76318	1.7077	6.25603
all_loops_82	chr1	133250000	133260000	chr1	133440000	133450000	129	63.687	62.1296	58.7552	85.9786	2.02392	2.07457	2.19352	1.49979	4.99752	174	78.208	72.2986	63.8525	105.138	2.22327	2.40474	2.72233	1.65434	6.93336
all_loops_83	chr1	133500000	133510000	chr1	133550000	133560000	124	32.3437	50.5405	65.0087	43.8506	3.82509	2.45061	1.90604	2.82362	2.73161	99	39.9422	52.3781	56.5119	46.6938	2.47489	1.88841	1.75052	2.1178	2.28084
all_loops_84	chr1	133510000	133520000	chr1	133570000	133580000	32	4.89367	11.6514	10.8118	10.6524	6.42813	2.73159	2.94178	2.98538	1.51233	46	9.35556	15.0138	17.1532	18.5017	4.87544	3.0502	2.67196	2.47827	2.12428
all_loops_85	chr1	133600000	133610000	chr1	133660000	133670000	133	40.8383	41.8193	42.2255	49.6789	3.25124	3.17515	3.14468	2.67382	4.56654	126	41.4638	40.2882	43.2033	49.9128	3.03389	3.1222	2.91202	2.52135	4.43606
all_loops_86	chr1	133600000	133610000	chr1	133780000	133790000	47	18.1822	15.4509	18.445	16.8889	2.57628	3.02877	2.53977	2.7724	4.07626	27	16.8837	16.3219	20.4151	17.1813	1.59565	1.65024	1.32098	1.56817	2.29584
all_loops_87	chr1	133830000	133840000	chr1	133880000	133890000	90	43.8713	42.0245	46.6131	40.1939	2.04906	2.1389	1.92879	2.23607	2.91095	64	36.1088	35.3824	38.5967	34.1272	1.77029	1.80653	1.65647	1.87278	2.34648
all_loops_88	chr1	133890000	133900000	chr1	133940000	133950000	215	96.0321	95.2799	104.471	96.8561	2.23755	2.25519	2.05697	2.21853	3.63417	200	97.3455	98.5161	99.8679	104.669	2.05346	2.02908	2.00164	1.90991	3.49885
all_loops_89	chr1	133890000	133900000	chr1	134000000	134010000	160	45.8027	46.8344	63.9222	60.4904	3.48781	3.41114	2.5007	2.64233	5.78014	174	49.6886	49.1939	68.3525	58.9621	3.49678	3.53188	2.54337	2.94775	6.57573
all_loops_90	chr1	133940000	133950000	chr1	134000000	134010000	147	75.1371	72.7636	68.046	86.6833	1.95515	2.01884	2.1586	1.69503	3.29495	140	70.4846	73.8691	78.4896	87.3856	1.98485	1.89404	1.78268	1.60141	3.34503
all_loops_91	chr1	134050000	134060000	chr1	134200000	134210000	144	61.0765	57.1457	69.844	58.8768	2.35548	2.51722	2.06022	2.44333	4.75491	131	60.8787	59.4667	81.0543	61.806	2.14993	2.20089	1.61544	2.11773	4.61459
all_loops_92	chr1	134060000	134070000	chr1	134110000	134120000	170	87.9557	84.2237	99.3971	82.9531	1.93173	2.01723	1.7096	2.04809	2.91027	131	70.6539	74.1428	85.149	75.489	1.8529	1.76583	1.53785	1.73438	2.41066
all_loops_93	chr1	134200000	134210000	chr1	134250000	134260000	214	97.5164	69.1733	77.3281	78.524	2.19328	3.09066	2.76514	2.72309	4.24299	173	92.0965	67.858	71.3689	78.2445	1.87751	2.54716	2.42203	2.20947	3.6776
all_loops_94	chr1	134260000	134270000	chr1	134360000	134370000	79	32.9476	29.474	43.3292	29.511	2.39352	2.67465	1.82135	2.6713	3.94533	52	26.5919	23.2234	33.6091	23.1011	1.95191	2.2338	1.54558	2.24558	2.77289
all_loops_95	chr1	134260000	134270000	chr1	134410000	134420000	57	23.8342	17.3216	28.1996	16.2585	2.38571	3.27754	2.01769	3.49053	4.42474	21	17.6822	12.8239	20.0309	10.3846	1.18658	1.63264	1.04814	2.01247	1.8247
all_loops_96	chr1	134420000	134430000	chr1	134490000	134500000	235	57.3075	55.1283	69.7487	59.7765	4.09529	4.25688	3.36585	3.92642	6.27557	185	51.7048	47.17	58.3879	53.5275	3.57303	3.9158	3.16476	3.45159	5.54535
all_loops_97	chr1	134650000	134660000	chr1	134860000	134870000	126	29.1174	27.368	32.5273	31.6313	4.31592	4.59079	3.86486	3.97399	10.845	31	19.2185	17.3441	18.8668	20.9581	1.60986	1.78284	1.63971	1.47686	2.7424
all_loops_98	chr1	134930000	134940000	chr1	134980000	134990000	222	70.1833	64.5434	76.243	71.3325	3.16007	3.43577	2.90924	3.10923	5.73203	205	64.5365	57.7338	67.8294	62.956	3.17313	3.54637	3.01931	3.25266	5.68025
all_loops_99	chr1	135050000	135060000	chr1	135500000	135510000	32	11.6278	10.9561	15.1625	12.6425	2.73708	2.90337	2.1032	2.51913	3.8512	40	14.9568	15.1218	19.8601	18.7318	2.66325	2.63438	2.00901	2.12938	4.72179
all_loops_100	chr1	135070000	135080000	chr1	135200000	135210000	242	67.7821	65.1397	101.048	69.9971	3.56648	3.71093	2.39351	3.45378	9.95205	227	71.5504	67.4262	102.946	76.9673	3.16956	3.36314	2.20387	2.94678	9.34398
all_loops_101	chr1	135070000	135080000	chr1	135250000	135260000	101	39.7921	38.5833	57.4697	39.7926	2.53434	2.61353	1.75613	2.5343	5.41423	123	46.5549	43.6716	70.5936	45.7127	2.63852	2.81233	1.74132	2.68703	6.53046
all_loops_102	chr1	135270000	135280000	chr1	135500000	135510000	167	70.3223	46.309	52.5241	60.1064	2.37283	3.6006	3.17535	2.77545	11.2358	172	61.6198	42.1863	46.155	60.3706	2.78841	4.06987	3.72068	2.84601	11.842
all_loops_103	chr1	135530000	135540000	chr1	135790000	135800000	47	19.5113	16.4371	18.5804	22.1902	2.40167	2.84815	2.52135	2.11304	4.19713	45	22.4703	18.5932	20.4918	24.4433	1.9982	2.41265	2.19019	1.83756	4.3127
all_loops_104	chr1	135540000	135550000	chr1	135590000	135600000	197	96.0638	97.2585	87.2959	111.352	2.04963	2.02448	2.25526	1.76848	3.32366	148	100.619	95.9432	89.0913	101.567	1.47042	1.54202	1.66048	1.45671	2.58846
all_loops_105	chr1	135630000	135640000	chr1	135790000	135800000	231	56.8875	49.5423	59.791	68.6564	4.05528	4.65531	3.85868	3.36114	10.9674	173	53.4261	48.1212	57.7147	63.3545	3.23394	3.58971	2.99405	2.72794	9.25449
all_loops_106	chr1	135630000	135640000	chr1	135940000	135950000	82	22.8023	21.8993	24.493	30.1171	3.58479	3.73194	3.33835	2.717	7.79485	65	22.3499	23.1443	26.291	26.7866	2.8998	2.80068	2.46675	2.42128	6.50144
all_loops_107	chr1	135800000	135810000	chr1	135940000	135950000	160	42.6658	36.6055	41.6474	59.8569	3.74365	4.36175	3.83497	2.67025	7.83448	139	39.3225	35.5869	38.0748	53.5963	3.52845	3.89779	3.64377	2.59049	7.53139
all_loops_108	chr1	135860000	135870000	chr1	135930000	135940000	185	65.1351	67.5671	73.1519	100.062	2.83743	2.73545	2.5269	1.84801	4.77037	140	50.9926	55.7019	59.833	78.4126	2.74208	2.51067	2.33761	1.78443	3.96824
all_loops_109	chr1	135950000	135960000	chr1	136000000	136010000	232	81.5506	56.5579	70.7261	69.9831	2.8426	4.09652	3.27704	3.31178	4.82708	212	81.8236	59.5999	78.2405	69.6705	2.589	3.55277	2.70741	3.03997	4.50976
all_loops_110	chr1	136040000	136050000	chr1	136140000	136150000	117	33.5744	39.5648	49.1426	49.8773	3.47742	2.95224	2.37802	2.34307	5.8904	114	31.5892	35.1586	40.1807	43.9338	3.60059	3.23609	2.83262	2.59119	5.87207
all_loops_111	chr1	136040000	136050000	chr1	136220000	136230000	88	28.3096	23.2014	28.581	30.7732	3.10106	3.78089	3.07173	2.85361	9.09654	76	25.062	20.8204	24.5429	28.12	3.0244	3.63759	3.08811	2.69667	7.791
all_loops_112	chr1	136410000	136420000	chr1	136500000	136510000	113	47.5802	47.5663	60.5345	55.6705	2.37205	2.37274	1.86528	2.02795	4.20692	79	43.0635	49.5916	56.6433	61.1877	1.83257	1.59182	1.394	1.29063	3.15898
all_loops_113	chr1	136640000	136650000	chr1	136720000	136730000	127	47.6501	54.8168	56.845	61.0972	2.66177	2.31441	2.23198	2.07689	5.53142	96	41.1068	49.0343	51.3935	59.6294	2.33214	1.95587	1.86626	1.60892	4.52178
all_loops_114	chr1	136880000	136890000	chr1	137000000	137010000	169	43.7215	41.0979	52.1257	53.19	3.85883	4.10458	3.23787	3.1732	8.73609	173	41.7876	40.7148	55.4688	48.983	4.13249	4.24111	3.11506	3.52668	9.38156
all_loops_115	chr1	137060000	137070000	chr1	137260000	137270000	73	21.2129	17.3233	23.208	20.9195	3.42984	4.19553	3.13626	3.47772	7.7452	63	22.4186	18.8399	23.5357	22.3463	2.80212	3.3316	2.66969	2.81115	6.8844
all_loops_116	chr1	137160000	137170000	chr1	137260000	137270000	94	34.834	32.4966	34.6324	42.1616	2.69365	2.88681	2.70929	2.22661	4.91212	81	31.8287	34.2723	34.2186	47.5376	2.54004	2.35945	2.36315	1.70244	4.24049
all_loops_117	chr1	137350000	137360000	chr1	137430000	137440000	112	45.2025	39.7381	43.3944	39.6793	2.47448	2.81389	2.57735	2.81805	4.95214	102	40.4599	37.5604	44.2664	43.166	2.51726	2.71107	2.30129	2.35982	4.6665
all_loops_118	chr1	137360000	137370000	chr1	137570000	137580000	46	21.1713	19.3591	19.7566	24.2232	2.16724	2.36907	2.32165	1.89531	5.1258	54	23.4488	20.9806	22.145	27.9863	2.29735	2.56634	2.432	1.92621	5.75724
all_loops_119	chr1	137440000	137450000	chr1	137560000	137570000	106	28.322	28.3703	35.0651	34.8141	3.73303	3.72669	3.0172	3.03888	7.68523	108	28.2075	29.9181	38.8472	38.5956	3.81878	3.60116	2.77555	2.7936	7.78832
all_loops_120	chr1	137610000	137620000	chr1	137670000	137680000	151	55.1385	56.006	88.429	66.147	2.73541	2.69312	1.70679	2.28086	4.79433	143	50.6455	52.4454	79.3619	57.3651	2.81996	2.72336	1.80086	2.49021	4.93994
all_loops_121	chr1	137760000	137770000	chr1	137840000	137850000	212	69.7898	62.0245	68.4422	68.7758	3.03478	3.41411	3.09444	3.07946	6.1822	228	67.3938	60.3684	68.3584	67.283	3.37957	3.77222	3.33195	3.38513	6.68823
all_loops_122	chr1	13780000	13790000	chr1	14710000	14720000	71	21.419	16.6041	21.9168	21.3666	3.30405	4.25643	3.22936	3.31212	20.3369	56	19.2208	17.2022	22.3742	18.103	2.90361	3.24237	2.49619	3.08191	14.2205
all_loops_123	chr1	13780000	13790000	chr1	14850000	14860000	46	14.4356	14.0966	18.1218	14.9315	3.17152	3.24727	2.52993	3.06689	12.8435	45	18.4328	16.7428	15.8539	17.5386	2.43352	2.6777	2.82689	2.55689	11.336
all_loops_124	chr1	138060000	138070000	chr1	138350000	138360000	72	25.2805	23.0835	21.9041	33.3416	2.84077	3.10996	3.27667	2.156	5.58278	94	29.8832	24.4068	24.0129	35.1609	3.13842	3.83975	3.90248	2.66868	7.17155
all_loops_125	chr1	138180000	138190000	chr1	138350000	138360000	179	58.9711	46.8526	54.1512	58.9625	3.03194	3.81448	3.30131	3.03238	9.19479	155	47.8296	37.6056	43.398	50.7236	3.236	4.11345	3.56568	3.05173	8.1062
all_loops_126	chr1	138200000	138210000	chr1	138320000	138330000	128	56.3504	63.6555	67.9526	71.0887	2.26925	2.00924	1.88237	1.79944	4.59526	103	43.715	53.0678	59.6132	61.5484	2.35307	1.93914	1.72659	1.67239	3.84417
all_loops_127	chr1	138440000	138450000	chr1	138630000	138640000	127	33.6115	30.4883	38.3668	37.4803	3.77023	4.15519	3.30415	3.38209	7.47872	100	26.7318	25.3983	30.2528	31.4823	3.73064	3.92575	3.29789	3.16949	6.20387
all_loops_128	chr1	138440000	138450000	chr1	139120000	139130000	54	14.621	12.5137	14.2369	14.5189	3.67501	4.289	3.77348	3.70069	13.8382	49	16.8051	13.2715	15.0116	15.1222	2.90445	3.67199	3.24916	3.22556	12.7993
all_loops_129	chr1	138520000	138530000	chr1	138590000	138600000	140	66.7751	73.4817	88.353	81.1793	2.09495	1.90401	1.58389	1.72369	3.03733	103	57.8124	63.9101	75.999	68.8956	1.78027	1.61068	1.35481	1.4943	2.33801
all_loops_130	chr1	139230000	139240000	chr1	139940000	139950000	34	10.1294	9.76954	9.71382	14.6421	3.33353	3.45508	3.47469	2.3131	15.0114	36	8.85874	8.59352	9.11737	11.2359	4.02958	4.15252	3.91652	3.18456	15.0347
all_loops_131	chr1	140020000	140030000	chr1	140210000	140220000	72	37.8693	29.271	37.5125	32.3558	1.8989	2.4548	1.91691	2.22148	3.3828	52	29.5003	23.0656	29.2652	23.9684	1.76012	2.24902	1.77421	2.16466	2.43249
all_loops_132	chr1	140020000	140030000	chr1	141160000	141170000	35	10.2896	9.98735	10.1872	9.70688	3.37838	3.47961	3.41201	3.57912	10.6518	29	15.0433	14.467	14.4268	15.3014	1.92164	1.99766	2.0032	1.88944	7.85678
all_loops_133	chr1	140220000	140230000	chr1	140380000	140390000	144	51.0054	47.5183	54.5668	58.4627	2.81966	3.02615	2.63597	2.46061	5.05935	103	52.568	47.4814	59.5304	53.0993	1.95754	2.16681	1.72898	1.938	3.77603
all_loops_134	chr1	140220000	140230000	chr1	140510000	140520000	62	19.3422	22.3557	30.6305	19.4123	3.19409	2.76544	2.02079	3.18261	4.83839	53	25.1201	24.1574	31.9729	23.5242	2.10546	2.18902	1.6556	2.2477	4.25834
all_loops_135	chr1	140730000	140740000	chr1	140970000	140980000	119	39.9255	35.5056	49.4292	38.3274	2.9756	3.34498	2.40464	3.09935	7.68205	129	39.4823	33.7538	53.1253	36.4356	3.26156	3.81346	2.42554	3.53354	8.099
all_loops_136	chr1	140730000	140740000	chr1	141050000	141060000	81	25.4901	20.2577	30.3483	17.9237	3.16919	3.98375	2.66353	4.49964	8.57322	75	24.9178	20.5114	28.6595	20.569	3.00186	3.64362	2.61131	3.63346	8.08316
all_loops_137	chr1	140730000	140740000	chr1	141160000	141170000	75	13.1516	14.8235	17.3137	15.2642	5.66723	5.03232	4.3127	4.88798	7.44247	39	12.4763	14.7586	13.9832	18.4592	3.10903	2.63147	2.77636	2.10677	3.75705
all_loops_138	chr1	141730000	141740000	chr1	142040000	142050000	90	29.5639	21.8223	20.5992	25.1975	3.03737	4.10997	4.35283	3.56162	5.9027	97	23.0118	18.4722	17.3012	20.5087	4.20131	5.22824	5.58008	4.7116	5.91202
all_loops_139	chr1	142060000	142070000	chr1	142420000	142430000	203	53.8793	38.8456	53.5258	46.9412	3.76256	5.21497	3.78736	4.31749	13.0306	161	43.0927	34.2285	48.3242	39.6619	3.7298	4.69289	3.32685	4.05162	10.6502
all_loops_140	chr1	142060000	142070000	chr1	142550000	142560000	73	15.785	20.218	25.2935	20.902	4.60183	3.5978	2.87869	3.48062	6.13541	55	20.4892	22.8229	25.5001	24.8313	2.67616	2.40371	2.15234	2.21007	4.5888
all_loops_141	chr1	142440000	142450000	chr1	142550000	142560000	105	31.9543	27.2574	32.9219	30.3068	3.27881	3.84174	3.18273	3.45646	3.38579	62	27.5981	24.9103	26.8182	27.1774	2.24203	2.48298	2.30699	2.27661	2.04393
all_loops_142	chr1	143850000	143860000	chr1	144640000	144650000	50	15.3937	16.8451	20.4834	19.6375	3.23356	2.9566	2.434	2.53831	9.64945	29	14.5919	15.2194	17.6794	16.0821	1.98069	1.89955	1.63673	1.79828	5.37833
all_loops_143	chr1	145650000	145660000	chr1	145850000	145860000	180	45.0219	37.5719	45.9401	45.6642	3.99141	4.78076	3.91181	3.93539	7.27226	103	35.064	30.4571	31.7099	34.1226	2.93198	3.37401	3.24112	3.01263	4.36602
all_loops_144	chr1	145650000	145660000	chr1	146220000	146230000	76	17.2467	13.2713	15.485	16.1505	4.38701	5.69128	4.88288	4.68292	8.9514	72	14.4726	14.0796	18.4687	18.2873	4.94765	5.08477	3.88288	3.9212	7.9057
all_loops_145	chr1	146040000	146050000	chr1	146220000	146230000	87	32.0683	23.4616	19.5351	43.4356	2.70763	3.69669	4.43593	2.00066	4.78912	59	25.0847	19.8109	17.0404	37.5851	2.34666	2.96823	3.44799	1.56826	3.37054
all_loops_146	chr1	146090000	146100000	chr1	146220000	146230000	105	25.8212	23.0136	27.1048	34.3561	4.05459	4.54711	3.86329	3.05026	5.41471	110	25.4687	21.5982	24.2219	31.3204	4.30604	5.07415	4.52679	3.50409	5.66873
all_loops_147	chr1	146270000	146280000	chr1	146550000	146560000	57	21.2497	18.8577	25.0626	20.3798	2.67451	3.01197	2.26924	2.78811	3.77531	56	21.3929	19.439	21.7625	22.4518	2.61017	2.87119	2.56604	2.48761	3.56105
all_loops_148	chr1	14730000	14740000	chr1	14850000	14860000	134	31.9174	28.567	37.8793	33.347	4.18835	4.67786	3.53087	4.00932	5.27458	96	29.9659	27.5366	33.4764	28.4525	3.19631	3.47728	2.86213	3.36573	4.06762
all_loops_149	chr1	14990000	15000000	chr1	15610000	15620000	103	18.3401	20.9549	31.7985	22.2255	5.59108	4.89673	3.23213	4.61804	18.1555	46	14.9606	17.6808	23.008	19.8093	3.06097	2.59268	1.99498	2.3155	7.51621
all_loops_150	chr1	15000000	15010000	chr1	15890000	15900000	27	10.2752	10.201	12.1394	11.3427	2.612	2.63082	2.21417	2.36832	6.17609	34	10.1998	10.5758	13.8349	11.8074	3.31074	3.19415	2.44709	2.86376	7.60031
all_loops_151	chr1	151680000	151690000	chr1	152100000	152110000	126	31.4606	28.957	43.9027	30.5744	3.99549	4.33975	2.86574	4.11092	13.9875	115	32.3955	30.8832	42.0384	36.0362	3.54203	3.71491	2.73148	3.18517	11.8598
all_loops_152	chr1	151680000	151690000	chr1	152220000	152230000	26	6.12794	5.78876	6.69861	5.66119	4.19079	4.43217	3.83902	4.53032	7.52375	18	5.63443	5.69712	6.8883	5.48952	3.15638	3.12224	2.59004	3.23821	4.64874
all_loops_153	chr1	152380000	152390000	chr1	152850000	152860000	60	14.2812	10.5145	13.7051	15.1475	4.17908	5.66205	4.35348	3.94163	12.8033	64	11.3245	10.0789	11.996	14.9043	5.61077	6.29732	5.29928	4.2721	12.732
all_loops_154	chr1	152620000	152630000	chr1	152850000	152860000	39	13.9965	11.7488	11.7191	14.9604	2.77374	3.29993	3.3082	2.59621	4.27816	19	12.9465	10.8043	10.69	15.6188	1.464	1.75161	1.77016	1.2151	1.98195
all_loops_155	chr1	152880000	152890000	chr1	153200000	153210000	102	50.2001	36.9098	43.3852	50.1805	2.02982	2.75873	2.34793	2.03061	9.96738	54	43.8532	31.3335	36.8816	38.1594	1.23085	1.72109	1.46289	1.41403	5.26568
all_loops_156	chr1	152920000	152930000	chr1	153020000	153030000	88	46.237	43.701	54.258	43.3309	1.90129	2.01137	1.62074	2.02851	3.17784	55	33.3984	33.3814	38.0968	31.1452	1.64485	1.64569	1.44253	1.76347	2.24373
all_loops_157	chr1	152920000	152930000	chr1	153190000	153200000	126	30.5438	37.2541	46.1718	48.5925	4.11503	3.3758	2.7252	2.58972	12.3654	74	27.4715	29.434	38.5859	32.8298	2.68755	2.50897	1.91543	2.25024	7.69177
all_loops_158	chr1	153020000	153030000	chr1	153190000	153200000	96	42.8741	40.9155	38.9016	55.6733	2.23623	2.34302	2.464	1.72305	4.62592	58	34.9331	32.4106	35.0113	42.7645	1.65843	1.78711	1.65474	1.35543	3.09302
all_loops_159	chr1	153330000	153340000	chr1	153400000	153410000	66	23.04	24.3376	26.6268	30.1407	2.85653	2.70485	2.47317	2.1858	2.76162	31	16.9522	19.3676	21.8026	26.9213	1.82381	1.59753	1.41992	1.15094	1.29134
all_loops_160	chr1	153330000	153340000	chr1	153550000	153560000	87	32.1185	31.9443	31.9142	43.1423	2.70341	2.71811	2.72067	2.01423	6.38907	75	23.2452	22.658	21.9847	33.2657	3.21693	3.29993	3.40055	2.25081	5.65144
all_loops_161	chr1	153410000	153420000	chr1	153550000	153560000	161	39.7673	39.9138	46.2707	49.7123	4.04091	4.02611	3.47418	3.23414	8.45988	150	29.9208	28.5745	32.1295	36.3733	4.99986	5.23462	4.65723	4.11533	8.71724
all_loops_162	chr1	153660000	153670000	chr1	154130000	154140000	47	15.4749	14.9285	20.4767	17.0334	3.02409	3.13405	2.289	2.74901	12.3067	37	14.8795	14.6259	20.9113	15.075	2.47672	2.51938	1.76572	2.44481	9.1654
all_loops_163	chr1	153660000	153670000	chr1	154210000	154220000	56	16.685	15.5242	20.499	19.191	3.34227	3.59057	2.72343	2.9081	15.3221	72	20.3184	18.2508	22.713	23.448	3.53113	3.92899	3.16049	3.06183	17.5922
all_loops_164	chr1	154230000	154240000	chr1	154350000	154360000	99	45.3315	35.6487	43.6915	46.1855	2.1813	2.77213	2.26299	2.14106	3.75134	57	36.3535	30.2129	32.6414	36.2381	1.56638	1.88369	1.74397	1.57135	2.41741
all_loops_165	chr1	154370000	154380000	chr1	154590000	154600000	138	31.9168	22.9493	32.4867	26.871	4.31336	5.99151	4.23792	5.12032	12.5221	125	29.2382	24.2213	29.5096	30.7046	4.26407	5.14364	4.22498	4.06108	11.2577
all_loops_166	chr1	154630000	154640000	chr1	154750000	154760000	82	39.0659	35.2313	45.2576	37.7698	2.09621	2.32372	1.81006	2.16795	3.23957	69	36.2986	32.7333	41.902	33.3436	1.89843	2.10457	1.64516	2.06616	2.92284
all_loops_167	chr1	154940000	154950000	chr1	155230000	155240000	100	31.6411	32.3388	31.7612	43.9337	3.15364	3.08581	3.14175	2.27326	8.19351	69	30.4593	31.6656	30.4145	47.4053	2.26118	2.17531	2.26449	1.45458	5.94725
all_loops_168	chr1	155110000	155120000	chr1	155170000	155180000	141	67.5575	69.9857	84.2044	83.5547	2.0855	2.01325	1.6737	1.68669	3.08361	122	61.3306	65.5418	83.0002	74.7124	1.98761	1.8601	1.46931	1.63208	3.05537
all_loops_169	chr1	155180000	155190000	chr1	155230000	155240000	136	70.2172	63.1546	69.8744	69.8612	1.93551	2.15162	1.945	1.94536	2.57509	103	66.0528	60.5286	62.3359	66.7525	1.55851	1.70052	1.65129	1.5422	2.07702
all_loops_170	chr1	155400000	155410000	chr1	155590000	155600000	236	41.0004	37.4259	45.7878	39.5402	5.74447	6.29165	5.14516	5.95608	13.0252	183	32.9322	29.4467	38.2987	33.4042	5.54307	6.19698	4.76839	5.46499	10.5117
all_loops_171	chr1	155740000	155750000	chr1	155880000	155890000	140	56.4661	51.9627	74.8331	48.9711	2.47675	2.69098	1.86967	2.85504	4.65268	114	52.7695	46.9564	64.8451	45.085	2.15815	2.42475	1.75687	2.52518	3.94668
all_loops_172	chr1	155740000	155750000	chr1	155960000	155970000	181	46.1956	49.5537	83.5559	47.3282	3.91182	3.64726	2.16482	3.8184	8.65925	189	44.3108	44.2998	70.8523	41.1335	4.25797	4.25903	2.66517	4.58607	9.12329
all_loops_173	chr1	155740000	155750000	chr1	156020000	156030000	203	42.8257	43.213	63.6543	50.583	4.73143	4.68913	3.18567	4.00726	11.8899	185	36.7041	38.7525	56.6596	45.444	5.02933	4.76418	3.26112	4.0642	10.9167
all_loops_174	chr1	155960000	155970000	chr1	156020000	156030000	159	79.9806	77.0195	80.4394	92.8297	1.98675	2.06303	1.97543	1.71205	2.24909	142	69.3598	67.4563	83.2747	80.9085	2.04579	2.10343	1.70435	1.75414	2.10731
all_loops_175	chr1	156130000	156140000	chr1	156570000	156580000	110	24.7151	32.5584	37.8301	47.3061	4.43681	3.37126	2.90271	2.32249	12.1671	76	19.4929	23.0821	22.0035	28.356	3.88405	3.28271	3.44289	2.6743	9.29914
all_loops_176	chr1	156630000	156640000	chr1	156850000	156860000	147	32.1324	21.0617	24.9753	25.608	4.56373	6.95124	5.86632	5.72194	12.1018	90	21.9854	14.3471	18.0363	15.9397	4.07962	6.23653	4.96794	5.61732	8.53129
all_loops_177	chr1	156630000	156640000	chr1	157050000	157060000	30	6.17625	9.12386	12.0693	7.55004	4.79585	3.26328	2.47344	3.93462	4.68798	11	5.11587	7.65417	10.4267	6.25146	2.12812	1.43149	1.05446	1.74763	1.68702
all_loops_178	chr1	156870000	156880000	chr1	157120000	157130000	77	25.657	20.0897	41.5269	15.1388	2.99336	3.81878	1.85217	5.05945	5.75509	62	24.789	20.5227	41.2954	16.8818	2.49508	3.01125	1.50017	3.65685	4.83704
all_loops_179	chr1	156880000	156890000	chr1	157060000	157070000	193	52.1621	47.4351	78.6097	55.6352	3.69484	4.06226	2.45332	3.4646	7.67605	159	48.0212	43.6276	68.0273	52.2715	3.30624	3.63844	2.33533	3.03791	6.7642
all_loops_180	chr1	156880000	156890000	chr1	157380000	157390000	30	8.12486	8.63679	11.2087	11.403	3.65964	3.4452	2.66166	2.61671	3.94046	23	7.6099	10.1678	11.6443	12.532	2.99615	2.24976	1.96692	1.82868	2.98776
all_loops_181	chr1	156890000	156900000	chr1	156940000	156950000	201	96.0714	83.0425	106.032	80.115	2.09106	2.41874	1.89481	2.50701	3.21276	173	87.2832	77.8066	94.1013	75.6777	1.98093	2.22189	1.83755	2.28431	2.88881
all_loops_182	chr1	156890000	156900000	chr1	156980000	156990000	173	67.6146	71.9747	113.995	70.2425	2.55632	2.40168	1.51715	2.46082	3.78358	146	59.6841	66.6397	100.983	62.1344	2.44379	2.1891	1.44535	2.34758	3.289
all_loops_183	chr1	157130000	157140000	chr1	157380000	157390000	171	42.5577	30.1225	34.2635	42.3911	4.011	5.66134	4.97913	4.02673	12.302	143	36.5875	29.74	35.5291	38.6726	3.90051	4.79558	4.01638	3.69075	10.0301
all_loops_184	chr1	157140000	157150000	chr1	157250000	157260000	126	55.4613	52.3783	62.9121	61.9299	2.26957	2.4029	2.0012	2.03289	3.57958	71	45.7221	45.9981	56.7967	51.3971	1.55165	1.54236	1.24963	1.38066	2.0507
all_loops_185	chr1	157420000	157430000	chr1	157630000	157640000	93	29.7009	23.4949	35.6558	21.3645	3.12407	3.94576	2.60378	4.3374	7.07846	70	21.9266	18.4004	27.404	18.0459	3.18251	3.7891	2.54872	3.86314	5.34199
all_loops_186	chr1	157440000	157450000	chr1	157560000	157570000	102	40.9181	47.2225	60.3303	49.9377	2.48915	2.15754	1.68955	2.04046	3.86021	51	31.2814	34.5469	43.2377	30.3791	1.62835	1.47488	1.17911	1.67656	1.99762
all_loops_187	chr1	158170000	158180000	chr1	158560000	158570000	49	18.0045	14.5645	18.1515	14.695	2.71204	3.34822	2.69019	3.3187	4.68621	29	18.4184	16.9068	21.505	16.4463	1.57141	1.71108	1.34691	1.75871	2.67981
all_loops_188	chr1	158190000	158200000	chr1	158340000	158350000	115	51.8469	50.5213	63.3528	51.5948	2.21572	2.27375	1.81395	2.22653	4.21227	89	48.2055	46.5741	57.7711	49.039	1.84451	1.90898	1.53963	1.81322	3.48513
all_loops_189	chr1	158190000	158200000	chr1	158460000	158470000	117	34.2269	36.4224	42.6892	49.6445	3.41132	3.20625	2.73667	2.35403	7.43388	101	37.8554	38.3696	40.8446	53.257	2.66365	2.62805	2.46919	1.89478	6.49379
all_loops_190	chr1	158340000	158350000	chr1	158460000	158470000	129	47.2652	47.1493	50.4509	62.4298	2.72563	2.73231	2.55386	2.06461	3.92428	82	43.5875	46.2111	47.4351	56.7719	1.87926	1.77279	1.72714	1.4436	2.63517
all_loops_191	chr1	158670000	158680000	chr1	158830000	158840000	106	37.5569	33.2278	49.8202	33.7941	2.81755	3.18353	2.12539	3.13034	5.10353	85	33.1238	31.7105	41.9025	33.3288	2.56141	2.67521	2.02607	2.54571	4.12014
all_loops_192	chr1	158670000	158680000	chr1	159000000	159010000	125	20.8472	22.2223	28.3923	24.5261	5.97215	5.60425	4.39066	5.07997	10.3508	84	20.42	25.8836	34.698	30.137	4.09844	3.23666	2.41681	2.78136	6.87606
all_loops_193	chr1	158670000	158680000	chr1	159210000	159220000	40	11.1824	8.48848	10.6834	8.57425	3.55421	4.66905	3.71867	4.62288	6.03457	51	12.9031	11.2068	14.0255	12.4097	3.92983	4.51942	3.61758	4.08483	7.49084
all_loops_194	chr1	158840000	158850000	chr1	159000000	159010000	191	60.7077	43.2922	44.8267	63.045	3.14269	4.40402	4.2536	3.02637	7.73573	162	60.4923	46.6704	51.0434	64.2043	2.67526	3.46587	3.16952	2.52083	6.73893
all_loops_195	chr1	159010000	159020000	chr1	159210000	159220000	109	33.2612	20.6551	26.2585	27.7921	3.27026	5.25654	4.13909	3.9115	6.57446	102	30.4181	19.7968	22.8925	27.508	3.34555	5.13148	4.44057	3.6982	6.24764
all_loops_196	chr1	159100000	159110000	chr1	159200000	159210000	93	43.3063	45.7167	42.3535	60.9295	2.14485	2.03201	2.19299	1.52549	2.71848	87	45.982	45.1003	45.1063	63.8397	1.89011	1.92698	1.92672	1.36222	2.54723
all_loops_197	chr1	159230000	159240000	chr1	159370000	159380000	87	35.7183	30.7528	49.6124	25.7349	2.43172	2.82309	1.75208	3.37141	3.98805	75	37.2012	30.0687	48.8154	25.9795	2.01334	2.48934	1.5353	2.87965	3.43699
all_loops_198	chr1	159230000	159240000	chr1	159460000	159470000	100	23.3932	17.0227	24.718	24.6057	4.26081	5.84603	4.03336	4.0517	5.70269	114	25.0581	17.9974	26.9223	25.6331	4.53532	6.30479	4.22244	4.43398	6.32691
all_loops_199	chr1	159340000	159350000	chr1	159460000	159470000	80	38.599	30.4891	26.4718	47.687	2.06982	2.61858	3.01448	1.67619	2.44978	64	35.7015	30.0593	29.5719	44.2748	1.79043	2.12538	2.16029	1.44451	1.9704
all_loops_200	chr1	159480000	159490000	chr1	160580000	160590000	60	10.804	8.53066	11.0236	13.5852	5.51174	6.96355	5.40293	4.3916	33.7199	40	7.59689	6.71671	9.27902	8.59322	5.20989	5.88261	4.2755	4.61279	20.2832
all_loops_201	chr1	159480000	159490000	chr1	160880000	160890000	23	5.76209	4.38301	4.37204	4.59038	3.94057	5.15278	5.16543	4.92498	17.7573	28	5.19068	4.35149	4.89417	4.92674	5.31122	6.31249	5.62656	5.5901	17.8063
all_loops_202	chr1	159670000	159680000	chr1	160580000	160590000	49	10.1747	9.42972	11.1725	9.99928	4.77874	5.1523	4.35572	4.86173	21.3038	13	6.6813	6.25214	6.05428	7.39391	1.93178	2.0623	2.1286	1.74808	5.5502
all_loops_203	chr1	160600000	160610000	chr1	160880000	160890000	61	17.7218	17.0911	18.1464	22.6588	3.42839	3.55417	3.3486	2.68468	5.64114	27	13.5949	13.0089	13.1186	14.645	1.97883	2.06729	2.05014	1.83792	2.45474
all_loops_204	chr1	160600000	160610000	chr1	161060000	161070000	83	21.463	19.0337	22.9317	22.5256	3.85383	4.34312	3.60808	3.67283	8.20992	45	14.0046	13.6639	15.4182	16.1534	3.19755	3.27669	2.90626	2.7748	4.39058
all_loops_205	chr1	16090000	16100000	chr1	16290000	16300000	102	37.3832	32.6444	32.1584	36.3911	2.72389	3.11809	3.16506	2.79794	4.95001	122	51.2616	41.4612	44.4657	51.0842	2.37726	2.93784	2.73978	2.3855	5.87665
all_loops_206	chr1	16090000	16100000	chr1	16410000	16420000	79	35.0874	28.5998	33.4745	36.5427	2.24796	2.75612	2.35595	2.15868	4.93892	61	26.4841	24.9548	24.517	30.952	2.29837	2.43866	2.48202	1.96767	3.9129
all_loops_207	chr1	16100000	16110000	chr1	16210000	16220000	81	37.3228	37.5445	43.3967	37.9273	2.16713	2.15437	1.86451	2.13268	2.55602	69	46.9046	44.799	55.1111	49.2204	1.47007	1.53901	1.25156	1.40104	2.35937
all_loops_208	chr1	161220000	161230000	chr1	162110000	162120000	49	19.6411	12.6818	13.2243	19.2434	2.4872	3.84139	3.68499	2.53834	11.2109	20	14.984	12.7056	11.5545	17.5098	1.33254	1.56963	1.72466	1.14141	4.38313
all_loops_209	chr1	161310000	161320000	chr1	162000000	162010000	47	16.1302	19.0177	21.4311	21.744	2.902	2.46369	2.18753	2.1562	12.0214	35	14.9213	18.4189	21.3454	23.348	2.33669	1.89536	1.63671	1.49693	8.40515
all_loops_210	chr1	161320000	161330000	chr1	161730000	161740000	49	19.5645	17.943	23.0128	18.4627	2.49688	2.72127	2.12436	2.64509	8.54905	13	16.3915	15.2541	19.3489	15.3921	0.79435	0.853191	0.673561	0.845595	2.37124
all_loops_211	chr1	162020000	162030000	chr1	162110000	162120000	69	38.4223	29.8192	33.5046	29.4606	1.79377	2.30956	2.05627	2.33757	2.14306	31	28.2003	21.6685	23.1086	19.8291	1.09893	1.42867	1.34002	1.56053	1.08475
all_loops_212	chr1	162120000	162130000	chr1	162300000	162310000	163	74.536	51.1098	40.7238	88.0809	2.18527	3.18494	3.99522	1.84961	4.94	160	74.1615	49.2901	40.7456	85.536	2.1559	3.24154	3.91964	1.86954	5.03867
all_loops_213	chr1	162150000	162160000	chr1	162300000	162310000	265	87.5389	69.2564	79.1216	106.469	3.02491	3.82229	3.34631	2.48758	6.11482	252	86.9678	67.9899	75.404	100.665	2.89544	3.70246	3.33889	2.50187	6.13611
all_loops_214	chr1	162330000	162340000	chr1	162490000	162500000	160	64.5509	54.4182	70.6975	56.1147	2.47638	2.93663	2.26138	2.84801	5.03641	112	58.0917	53.4291	72.6687	52.2365	1.92639	2.09419	1.5405	2.14191	3.60152
all_loops_215	chr1	162330000	162340000	chr1	162650000	162660000	204	63.2529	45.0796	62.365	52.5468	3.22164	4.51753	3.26743	3.87678	11.3825	202	68.7023	48.1749	64.1266	55.223	2.9374	4.18644	3.14667	3.65309	11.1125
all_loops_216	chr1	162490000	162500000	chr1	162640000	162650000	145	38.6582	32.5106	36.5395	44.4734	3.74373	4.44948	3.96021	3.25531	7.20493	100	35.7416	32.3964	34.6904	42.144	2.79284	3.08034	2.87723	2.36957	4.84317
all_loops_217	chr1	162670000	162680000	chr1	162860000	162870000	97	37.3886	27.9786	38.2154	28.7542	2.59012	3.45815	2.53423	3.36519	5.14679	102	37.5594	29.9039	40.6589	32.0749	2.71114	3.4029	2.50497	3.17328	5.44083
all_loops_218	chr1	162780000	162790000	chr1	162860000	162870000	151	67.2489	62.9648	65.8913	62.0026	2.24354	2.39595	2.28969	2.43307	3.0795	114	56.4394	53.7907	57.2005	53.1956	2.01806	2.11725	1.99126	2.14089	2.45098
all_loops_219	chr1	163210000	163220000	chr1	163660000	163670000	68	32.5135	25.1104	25.704	31.8957	2.08809	2.70126	2.63913	2.12841	8.30244	46	28.5851	22.975	21.4638	27.7018	1.60711	1.99784	2.13784	1.65817	5.40653
all_loops_220	chr1	163330000	163340000	chr1	163610000	163620000	170	42.9631	49.068	69.1473	49.7019	3.95002	3.45957	2.45641	3.41553	11.7951	134	39.8201	46.4652	64.1712	46.3682	3.35921	2.87983	2.08647	2.88585	9.03831
all_loops_221	chr1	163330000	163340000	chr1	163660000	163670000	142	48.0931	48.5522	77.5044	47.7839	2.94855	2.92073	1.83108	2.9676	9.75366	162	50.1669	47.892	68.7712	48.9718	3.22478	3.37764	2.35367	3.30332	10.6608
all_loops_222	chr1	163680000	163690000	chr1	163890000	163900000	69	30.3455	22.5765	25.0472	24.6953	2.26963	3.04721	2.74782	2.78682	3.30157	35	19.9014	14.9685	13.9755	18.3856	1.75488	2.32937	2.4937	1.89877	1.74822
all_loops_223	chr1	163800000	163810000	chr1	163890000	163900000	96	51.9682	42.4309	42.4025	48.0735	1.84566	2.25953	2.26105	1.99487	2.67665	55	39.488	33.3354	31.4454	35.4024	1.39184	1.64796	1.74669	1.55201	1.59189
all_loops_224	chr1	163920000	163930000	chr1	164240000	164250000	169	53.1817	39.9171	66.3219	39.7435	3.1737	4.22569	2.54585	4.24411	15.0816	134	43.1856	34.3288	48.6113	40.6198	3.09803	3.895	2.75295	3.29324	12.2717
all_loops_225	chr1	163930000	163940000	chr1	164200000	164210000	119	30.7967	36.0813	54.9865	36.612	3.85478	3.29176	2.16206	3.24417	11.9583	73	23.5779	29.9025	49.3316	24.5403	3.08727	2.43646	1.47881	2.96669	8.05335
all_loops_226	chr1	164290000	164300000	chr1	164450000	164460000	120	47.1192	42.0486	63.3229	42.8481	2.54346	2.84944	1.89364	2.7964	5.13143	92	37.9705	33.3296	53.2965	35.3851	2.41919	2.75504	1.72483	2.59546	4.1369
all_loops_227	chr1	164290000	164300000	chr1	164590000	164600000	64	19.8071	16.3437	23.1067	16.9464	3.21995	3.89815	2.76213	3.76033	4.84649	71	22.6038	18.4211	24.5409	18.867	3.13163	3.83887	2.88544	3.74861	5.45417
all_loops_228	chr1	16430000	16440000	chr1	16720000	16730000	48	19.3112	18.5728	22.5685	22.832	2.47796	2.57594	2.12189	2.09751	3.75542	49	17.7744	17.8573	24.0868	19.9681	2.74694	2.73426	2.03004	2.44667	3.85688
all_loops_229	chr1	16430000	16440000	chr1	17110000	17120000	31	7.69906	6.83788	7.6849	9.17454	3.98766	4.48263	3.99492	3.35327	6.88266	31	9.86856	7.70632	8.96272	9.23719	3.11981	3.98395	3.43164	3.33077	6.63466
all_loops_230	chr1	164480000	164490000	chr1	164590000	164600000	158	52.1799	50.0668	53.1725	74.6031	3.02411	3.15148	2.96776	2.11638	4.5266	152	41.8354	43.3952	42.6557	63.3245	3.62701	3.49694	3.55742	2.39813	4.49484
all_loops_231	chr1	164510000	164520000	chr1	164590000	164600000	147	53.1844	56.5119	60.2673	75.9884	2.76066	2.59839	2.43675	1.93328	4.2603	100	43.9299	45.2268	45.1086	64.5066	2.27346	2.20841	2.21418	1.54938	2.98481
all_loops_232	chr1	164820000	164830000	chr1	164980000	164990000	117	40.2228	41.9475	42.0269	54.4596	2.90406	2.78494	2.7797	2.14628	4.79033	68	32.3223	30.6845	34.5342	37.9605	2.10041	2.21215	1.96626	1.78926	2.90824
all_loops_233	chr1	165070000	165080000	chr1	165770000	165780000	59	23.6556	21.3612	29.7532	22.4058	2.48783	2.7538	1.97969	2.626	13.3186	28	20.3928	19.3667	26.5531	17.8494	1.37121	1.44349	1.05429	1.56551	5.15159
all_loops_234	chr1	165070000	165080000	chr1	165840000	165850000	51	19.5324	17.8489	23.2017	20.4911	2.60283	2.84697	2.19297	2.48166	12.0893	45	18.2534	16.5139	21.7743	18.8939	2.45731	2.71459	2.06178	2.37445	9.25148
all_loops_235	chr1	165770000	165780000	chr1	165830000	165840000	74	35.1805	35.1808	38.0552	38.2272	2.10031	2.10029	1.94207	1.93335	2.33467	40	34.2229	37.2255	40.8501	38.2184	1.16832	1.07433	0.979241	1.04649	1.20754
all_loops_236	chr1	165930000	165940000	chr1	166060000	166070000	75	26.4729	24.261	24.8118	30.23	2.82619	3.0828	3.01464	2.47609	4.04014	55	25.8651	23.4579	22.3489	30.4378	2.12208	2.33892	2.45446	1.80432	2.95378
all_loops_237	chr1	165990000	166000000	chr1	166060000	166070000	98	47.804	50.477	52.0499	55.6962	2.04785	1.93962	1.88112	1.75819	2.56999	71	46.1386	52.166	53.0483	55.3219	1.53768	1.36035	1.33777	1.28289	1.84355
all_loops_238	chr1	166250000	166260000	chr1	167050000	167060000	53	26.0017	20.7364	29.1104	27.9059	2.03435	2.54843	1.81784	1.89603	14.8017	53	21.0604	17.545	18.4075	22.2662	2.5094	3.00935	2.8691	2.37412	13.9456
all_loops_239	chr1	166290000	166300000	chr1	166830000	166840000	54	15.2605	17.2581	19.5596	21.4427	3.52202	3.1167	2.75184	2.51129	11.2338	36	13.0481	13.8219	15.4384	16.2585	2.74565	2.59304	2.32327	2.20681	7.17115
all_loops_240	chr1	166830000	166840000	chr1	167050000	167060000	47	20.0298	18.784	19.3185	22.1321	2.33982	2.49418	2.42552	2.11855	3.77179	20	21.1027	19.1405	18.187	23.2678	0.947993	1.04467	1.09914	0.860159	1.70363
all_loops_241	chr1	167180000	167190000	chr1	167250000	167260000	139	60.5921	56.1052	65.0776	65.1327	2.2919	2.47486	2.13417	2.13237	3.21759	111	47.6208	44.5503	52.0531	56.3721	2.32813	2.48822	2.13026	1.96734	2.88857
all_loops_242	chr1	167310000	167320000	chr1	167430000	167440000	124	46.3523	44.6228	58.1333	47.9893	2.67156	2.77487	2.13108	2.58062	4.29597	73	37.681	35.4952	41.1714	35.383	1.93483	2.05365	1.7712	2.06014	2.65396
all_loops_243	chr1	167510000	167520000	chr1	167660000	167670000	76	17.3299	18.224	18.8285	24.339	4.36605	4.15303	4.02039	3.11387	4.00318	73	14.9682	16.455	20.4024	19.4934	4.85126	4.41558	3.56544	3.73084	4.03265
all_loops_244	chr1	167590000	167600000	chr1	167660000	167670000	203	53.8047	49.4439	56.2632	54.5124	3.76776	4.09939	3.60342	3.71893	5.03453	97	49.9846	44.2524	56.8834	39.6829	1.93872	2.18929	1.704	2.44075	2.52418
all_loops_245	chr1	167700000	167710000	chr1	167900000	167910000	89	25.5639	20.6563	33.6188	23.0107	3.47181	4.29267	2.64244	3.85536	5.31415	68	23.4937	20.4006	30.7892	24.0658	2.88637	3.32186	2.20466	2.81803	4.36592
all_loops_246	chr1	167700000	167710000	chr1	168080000	168090000	81	18.4726	14.9851	15.4119	18.2995	4.36665	5.37616	5.22824	4.40773	10.9496	67	17.7331	16.5675	15.3809	20.6277	3.76266	4.0258	4.33438	3.23722	9.28076
all_loops_247	chr1	167710000	167720000	chr1	167780000	167790000	131	40.0925	35.8538	48.4653	35.7286	3.2618	3.64635	2.69946	3.65909	4.36573	55	29.7824	29.1429	31.147	27.0091	1.8439	1.88422	1.76337	2.03253	2.15834
all_loops_248	chr1	167790000	167800000	chr1	167900000	167910000	67	32.8356	29.4599	29.9579	38.3144	2.03731	2.26997	2.23236	1.74674	2.992	38	27.2912	25.6316	26.1654	32.4584	1.39096	1.48067	1.45058	1.1702	1.78484
all_loops_249	chr1	16790000	16800000	chr1	17110000	17120000	48	19.089	16.5612	16.3829	19.7683	2.50664	2.88695	2.91818	2.42094	4.40563	35	13.8156	13.7391	12.7753	16.6821	2.52235	2.53629	2.72615	2.09152	3.28989
all_loops_250	chr1	167920000	167930000	chr1	168080000	168090000	71	33.6127	24.4316	26.0615	36.9022	2.109	2.8983	2.71773	1.92151	3.57346	68	33.3745	24.7962	23.0101	37.5941	2.03439	2.73535	2.94676	1.80665	3.61836
all_loops_251	chr1	167980000	167990000	chr1	168080000	168090000	67	37.957	31.3902	33.229	37.7466	1.76315	2.13082	2.01326	1.77295	2.67461	66	33.1981	30.0091	30.8267	37.0905	1.9851	2.19535	2.13731	1.77733	2.78569
all_loops_252	chr1	168090000	168100000	chr1	168250000	168260000	65	22.0788	22.6892	30.5814	29.4161	2.93524	2.85662	2.12181	2.20557	5.31272	64	20.102	20.1943	25.3636	25.105	3.17295	3.15852	2.51732	2.54315	5.29869
all_loops_253	chr1	168140000	168150000	chr1	168240000	168250000	72	25.3249	31.5976	34.0859	38.8716	2.83581	2.27462	2.10906	1.85007	4.05969	58	25.4947	30.3837	32.0659	39.3312	2.27	1.90593	1.80626	1.47345	3.12134
all_loops_254	chr1	168710000	168720000	chr1	169140000	169150000	92	27.964	27.5112	29.3729	39.1053	3.28179	3.3356	3.12491	2.34917	10.015	124	28.1584	28.5838	31.9524	39.5789	4.39161	4.32648	3.87179	3.12761	12.5487
all_loops_255	chr1	168710000	168720000	chr1	169260000	169270000	42	12.1441	14.6386	17.1288	17.2869	3.43838	2.85645	2.44358	2.42136	5.23044	51	14.0495	18.0904	18.5655	24.123	3.61145	2.80917	2.73768	2.10956	5.74302
all_loops_256	chr1	169150000	169160000	chr1	169200000	169210000	118	52.4763	50.6392	56.8069	53.5265	2.24626	2.32759	2.07532	2.20227	2.31572	91	54.1552	53.8874	65.1388	52.9582	1.6791	1.68743	1.39641	1.71698	1.85482
all_loops_257	chr1	169150000	169160000	chr1	169260000	169270000	137	38.9669	32.5141	58.0646	30.7544	3.50937	4.2037	2.3571	4.44345	4.70394	163	40.907	35.1068	64.209	36.7494	3.97737	4.63263	2.53619	4.42612	5.62895
all_loops_258	chr1	169340000	169350000	chr1	169570000	169580000	95	26.4199	21.8069	25.7049	30.8233	3.58598	4.34109	3.68535	3.07535	7.23183	78	26.6964	22.1471	23.5959	28.1405	2.91457	3.51057	3.29593	2.76554	5.48878
all_loops_259	chr1	169870000	169880000	chr1	171390000	171400000	36	13.353	11.1424	14.3821	9.93725	2.68342	3.21105	2.49272	3.5966	25.5883	30	14.9011	13.0667	14.4125	14.7213	2.00653	2.28607	2.07408	2.03086	18.7749
all_loops_260	chr1	170140000	170150000	chr1	170240000	170250000	91	45.1401	47.342	54.8338	50.857	2.0137	1.92024	1.65836	1.78778	2.33097	55	48.3158	50.7258	59.1914	55.4597	1.13806	1.0841	0.929309	0.991726	1.64882
all_loops_261	chr1	171460000	171470000	chr1	171590000	171600000	57	25.5414	18.8438	22.64	20.5426	2.22687	3.01418	2.51099	2.76612	2.9571	50	21.0573	16.3744	18.6529	18.2597	2.36798	3.04108	2.67159	2.7288	2.84392
all_loops_262	chr1	171460000	171470000	chr1	171860000	171870000	83	26.6732	19.0486	22.7402	21.1334	3.10386	4.33973	3.63833	3.91365	12.0134	64	23.7267	16.887	24.0065	18.9736	2.69026	3.77347	2.65904	3.36067	9.35673
all_loops_263	chr1	17150000	17160000	chr1	17610000	17620000	73	16.1503	14.2119	19.1487	16.4172	4.49839	5.10765	3.79767	4.42568	16.1385	56	14.2611	13.8594	16.1022	15.3383	3.90639	4.0188	3.46249	3.63381	10.5296
all_loops_264	chr1	171600000	171610000	chr1	171850000	171860000	87	20.1331	21.9604	25.8112	25.9722	4.30482	3.94824	3.36147	3.34072	8.56344	78	18.4075	18.9132	23.1209	22.8139	4.21991	4.10766	3.36335	3.4084	8.87074
all_loops_265	chr1	171870000	171880000	chr1	172070000	172080000	52	27.75	20.997	24.1664	23.4728	1.87074	2.46954	2.147	2.21017	3.92731	29	22.4789	19.2217	19.3059	19.8799	1.28881	1.50608	1.49954	1.45646	2.28475
all_loops_266	chr1	172220000	172230000	chr1	172540000	172550000	178	36.5415	33.5066	39.9114	46.167	4.86061	5.29955	4.45123	3.84939	18.472	131	32.79	27.8693	33.7989	36.1401	3.98601	4.68729	3.86738	3.61754	15.5004
all_loops_267	chr1	172550000	172560000	chr1	172760000	172770000	88	33.2572	24.5102	29.9107	35.1411	2.64111	3.57982	2.93562	2.49992	5.38987	66	30.4948	23.5929	26.5129	29.7639	2.1605	2.78987	2.48376	2.21338	4.03363
all_loops_268	chr1	172820000	172830000	chr1	172920000	172930000	144	44.4302	35.3748	38.6047	39.6016	3.23601	4.06204	3.72306	3.62958	6.70459	141	36.2463	28.7016	33.9538	29.5998	3.8821	4.89903	4.14344	4.75087	7.22978
all_loops_269	chr1	172970000	172980000	chr1	173030000	173040000	83	29.2818	26.8475	32.3948	28.0417	2.82828	3.08377	2.55733	2.95291	2.93863	51	28.4026	23.172	19.6109	22.4305	1.79282	2.19578	2.59247	2.26804	1.84524
all_loops_270	chr1	173050000	173060000	chr1	173140000	173150000	119	52.687	50.8655	69.0331	55.3365	2.25624	2.33687	1.72276	2.1484	4.04732	110	39.4577	40.538	58.6781	48.0991	2.78328	2.70929	1.87315	2.28427	4.07165
all_loops_271	chr1	173280000	173290000	chr1	173400000	173410000	163	47.5393	47.8051	45.3826	74.0688	3.42364	3.40465	3.58598	2.19904	5.495	146	51.1134	51.7963	53.2082	81.6544	2.85277	2.81523	2.74067	1.78706	5.08046
all_loops_272	chr1	173640000	173650000	chr1	175890000	175900000	26	1.31598	1.54212	3.97562	2.03479	18.4324	15.8941	6.40394	12.226	22.5615	39	1.81489	1.98415	2.85912	1.37912	20.4189	18.7606	13.2134	26.4347	26.9412
all_loops_273	chr1	173750000	173760000	chr1	173920000	173930000	87	26.1871	23.0255	33.6046	25.7503	3.31341	3.76641	2.58422	3.3694	5.66689	56	20.6553	20.1324	28.3505	21.7852	2.70293	2.77278	1.97185	2.56337	3.88078
all_loops_274	chr1	174070000	174080000	chr1	174240000	174250000	135	41.8151	38.4957	40.6812	62.3054	3.22318	3.50039	3.3128	2.16488	6.67386	119	40.1927	35.8244	36.2007	57.9757	2.95587	3.31529	3.28093	2.05077	6.10731
all_loops_275	chr1	174140000	174150000	chr1	174230000	174240000	112	47.2001	42.416	41.1676	59.804	2.36997	2.63665	2.71642	1.87133	4.25012	80	41.9059	37.9621	35.337	54.1338	1.90687	2.10445	2.26035	1.47694	3.29462
all_loops_276	chr1	174340000	174350000	chr1	174410000	174420000	149	42.3245	39.8457	44.539	46.7199	3.51448	3.73257	3.34013	3.18455	4.89902	146	37.943	37.0393	46.6408	43.1337	3.84039	3.93384	3.12575	3.37931	4.77352
all_loops_277	chr1	174340000	174350000	chr1	175330000	175340000	27	8.27005	5.66824	6.6543	8.09075	3.23773	4.69814	4.01226	3.30861	15.216	21	10.3032	7.76803	9.51048	10.9543	2.02822	2.68174	2.19552	1.90876	10.5551
all_loops_278	chr1	174550000	174560000	chr1	175320000	175330000	38	15.9388	13.8642	13.7791	19.2399	2.37549	2.72841	2.74514	1.97002	15.4262	33	13.4219	13.3113	11.6165	19.0228	2.44789	2.46807	2.82509	1.73091	11.9087
all_loops_279	chr1	175160000	175170000	chr1	176280000	176290000	53	12.5496	5.56609	3.62912	5.05477	4.19776	9.37154	14.2393	10.3011	37.8951	47	10.7017	5.5447	4.2738	5.32893	4.36044	8.34411	10.7687	8.67574	29.9538
all_loops_280	chr1	175200000	175210000	chr1	176260000	176270000	56	8.01509	5.12969	4.41756	6.08652	6.91305	10.7272	12.4182	9.06811	42.032	40	7.57859	5.78572	4.55533	7.30111	5.22231	6.8131	8.61378	5.41811	28.1774
all_loops_281	chr1	175220000	175230000	chr1	176230000	176240000	55	4.25583	7.01762	7.45276	3.02493	12.6497	7.74136	7.29534	17.6324	33.232	39	4.23499	6.69473	6.36049	2.79023	9.01964	5.75446	6.05217	13.5283	21.3432
all_loops_282	chr1	175380000	175390000	chr1	175890000	175900000	41	14.9737	13.8108	19.5181	13.742	2.7266	2.95455	2.095	2.96922	6.19856	24	14.4815	12.7334	22.5073	12.6501	1.65278	1.87792	1.06603	1.89017	3.31129
all_loops_283	chr1	175380000	175390000	chr1	176390000	176400000	29	6.19313	4.45309	5.45283	5.35495	4.62409	6.39126	5.24057	5.3346	30.4961	35	6.90803	5.73979	6.99505	6.32808	5.00854	6.01049	4.94711	5.46042	31.9537
all_loops_284	chr1	175450000	175460000	chr1	175560000	175570000	62	22.5237	28.4707	32.8325	26.0663	2.74491	2.17356	1.88567	2.37328	2.59354	53	24.5323	30.8293	30.3751	30.9207	2.1557	1.71682	1.74241	1.71176	2.10442
all_loops_285	chr1	175520000	175530000	chr1	175600000	175610000	79	26.9411	30.2383	30.1961	33.2011	2.92517	2.60726	2.6109	2.3753	2.85522	58	29.3155	32.4559	33.5841	29.1741	1.97515	1.78462	1.72485	1.98469	2.02918
all_loops_286	chr1	175690000	175700000	chr1	175840000	175850000	131	17.7974	26.7625	27.1772	32.8005	7.3251	4.88042	4.80621	3.98475	8.69074	117	20.1128	29.1773	32.6745	35.7361	5.79337	3.99969	3.5729	3.26766	7.4616
all_loops_287	chr1	175710000	175720000	chr1	175850000	175860000	147	23.1023	42.9073	42.869	43.6676	6.33988	3.42035	3.4234	3.36093	6.32062	121	29.1324	47.6273	41.8487	48.4896	4.14266	2.53733	2.88686	2.4923	5.03487
all_loops_288	chr1	175730000	175740000	chr1	175800000	175810000	46	17.9184	19.2076	18.8142	20.8083	2.5585	2.38767	2.43733	2.20486	2.13493	56	18.8697	23.3413	26.7466	23.9564	2.95735	2.39321	2.08965	2.33202	2.41246
all_loops_289	chr1	175730000	175740000	chr1	175870000	175880000	133	12.8031	32.6127	25.9856	33.85	10.3154	4.06875	5.10243	3.92047	7.96634	124	18.1432	37.6331	29.2665	40.2472	6.80254	3.28889	4.2259	3.0758	6.90883
all_loops_290	chr1	175770000	175780000	chr1	175910000	175920000	236	57.3259	106.629	70.7649	95.2447	4.11139	2.21215	3.33169	2.47628	5.2494	274	63.4804	114.26	80.1251	119.353	4.31108	2.39683	3.41664	2.29462	5.84037
all_loops_291	chr1	175790000	175800000	chr1	176030000	176040000	42	12.0558	13.6508	16.7593	15.7577	3.46337	3.06165	2.49714	2.65487	4.83431	33	16.9278	17.1943	18.7994	18.4505	1.94387	1.91393	1.75138	1.78432	3.62506
all_loops_292	chr1	175800000	175810000	chr1	175880000	175890000	73	20.366	39.6887	40.7565	40.5579	3.57178	1.8372	1.78919	1.79793	1.85735	90	24.7717	49.3523	47.9171	51.6159	3.6226	1.82196	1.87642	1.74221	2.18617
all_loops_293	chr1	175810000	175820000	chr1	175920000	175930000	43	6.0123	10.0447	17.6841	11.6901	7.05135	4.24853	2.42351	3.6556	5.10614	50	6.71541	11.3414	16.9674	14.2178	7.35099	4.37885	2.93542	3.49914	5.73886
all_loops_294	chr1	175860000	175870000	chr1	175910000	175920000	91	29.5206	40.3181	36.9542	40.7296	3.07556	2.25394	2.45856	2.23123	1.40412	84	36.1328	47.7381	40.1437	44.707	2.3211	1.75801	2.08977	1.87694	1.22771
all_loops_295	chr1	175880000	175890000	chr1	176030000	176040000	54	18.9451	19.0945	20.0465	21.8161	2.84062	2.81852	2.68533	2.4685	2.64609	44	26.4428	22.8575	20.972	28.8664	1.66147	1.92094	2.09282	1.52245	2.12984
all_loops_296	chr1	176980000	176990000	chr1	177590000	177600000	45	12.8691	12.3238	14.902	13.4534	3.47751	3.63013	3.00627	3.32759	11.2681	33	11.2835	11.6011	14.8219	13.6164	2.90771	2.8288	2.21822	2.41318	8.2214
all_loops_297	chr1	176980000	176990000	chr1	177850000	177860000	37	8.79535	8.95041	11.062	11.1392	4.17072	4.09926	3.32378	3.30094	13.6588	26	7.93391	8.66654	9.34252	10.1384	3.24873	2.97723	2.76409	2.54923	9.1565
all_loops_298	chr1	177600000	177610000	chr1	177850000	177860000	69	25.3632	20.7973	23.5183	26.0668	2.71372	3.30664	2.92569	2.64075	4.66866	27	20.5286	17.6319	15.4188	19.2576	1.31371	1.52832	1.74627	1.39997	1.88336
all_loops_299	chr1	177870000	177880000	chr1	178630000	178640000	46	16.1672	11.9303	14.353	14.8751	2.83393	3.832	3.18966	3.07845	11.762	30	11.4824	8.16969	9.04542	8.66795	2.59876	3.6398	3.29126	3.43296	7.27931
all_loops_300	chr1	178150000	178160000	chr1	178630000	178640000	27	8.93681	8.83909	10.2201	9.72086	2.99885	3.03163	2.62595	2.75943	4.7551	11	7.85827	6.37373	7.51036	6.12951	1.39478	1.71462	1.45854	1.78184	1.78902
all_loops_301	chr1	178660000	178670000	chr1	178790000	178800000	72	33.6608	26.2315	23.7868	42.1729	2.13561	2.73817	3.0184	1.70558	3.35089	73	40.385	32.1978	35.0645	46.9431	1.80561	2.26331	2.0788	1.5539	3.1712
all_loops_302	chr1	178720000	178730000	chr1	178780000	178790000	148	55.2761	57.8382	52.982	72.2137	2.67444	2.55617	2.79003	2.04802	3.09564	133	62.1463	62.4584	60.6064	68.3138	2.13828	2.12761	2.19252	1.94551	2.98238
all_loops_303	chr1	178800000	178810000	chr1	179610000	179620000	50	11.5259	13.0316	11.3276	19.2189	4.30936	3.81522	4.38413	2.59331	11.2857	42	12.0377	14.0535	16.0624	18.8779	3.46855	2.97453	2.6048	2.21836	9.06738
all_loops_304	chr1	178810000	178820000	chr1	179120000	179130000	54	27.7579	21.4558	27.9834	24.2326	1.942	2.50976	1.9264	2.22335	3.83861	37	32.0822	24.1702	29.9345	26.4788	1.15281	1.52862	1.23525	1.39585	2.57141
all_loops_305	chr1	178810000	178820000	chr1	179630000	179640000	52	15.2694	13.1594	14.1294	17.2071	3.38984	3.92927	3.66143	3.01033	12.1051	30	18.8937	15.6801	15.5906	19.594	1.58473	1.90746	1.91835	1.52839	6.32531
all_loops_306	chr1	179120000	179130000	chr1	179610000	179620000	139	33.5691	31.7529	29.9906	50.7855	4.13139	4.36695	4.6227	2.73359	12.722	130	36.7154	31.6291	33.7634	45.4765	3.53384	4.10033	3.8419	2.85454	11.6736
all_loops_307	chr1	179190000	179200000	chr1	179360000	179370000	67	31.8502	30.9423	32.7973	37.2947	2.10015	2.16156	2.03968	1.79437	3.97812	64	31.5111	30.6991	31.4995	36.4389	2.02777	2.08123	2.02851	1.7543	3.85948
all_loops_308	chr1	179400000	179410000	chr1	179610000	179620000	153	72.7599	62.2236	69.1569	92.6011	2.10129	2.45653	2.21061	1.65154	5.2356	164	70.9349	58.7074	67.6529	79.1938	2.31013	2.79046	2.42204	2.06952	5.99353
all_loops_309	chr1	179630000	179640000	chr1	179690000	179700000	110	59.55	51.1089	58.7476	49.7507	1.84577	2.15002	1.87094	2.20859	2.35108	93	61.6819	54.1648	67.372	51.5462	1.50691	1.71566	1.37983	1.80265	2.0976
all_loops_310	chr1	17970000	17980000	chr1	18090000	18100000	54	17.5559	17.2901	17.8359	18.1878	3.06414	3.11097	3.01629	2.95825	2.90638	22	16.388	15.7142	17.4886	15.9106	1.34037	1.39748	1.25649	1.38033	1.28134
all_loops_311	chr1	179870000	179880000	chr1	180390000	180400000	38	10.929	10.7596	12.7257	11.4309	3.45452	3.50842	2.97059	3.30417	6.27211	29	13.7171	12.1665	13.8058	14.4093	2.10609	2.37232	2.09265	2.0056	4.46231
all_loops_312	chr1	180070000	180080000	chr1	180230000	180240000	87	25.5899	22.4065	30.4956	28.5027	3.39044	3.86999	2.84682	3.04516	5.39432	73	26.6903	22.574	27.667	25.0428	2.7286	3.22396	2.63262	2.9074	4.83341
all_loops_313	chr1	180070000	180080000	chr1	180390000	180400000	92	21.9617	20.2065	23.3384	27.0778	4.17466	4.53549	3.92944	3.3888	7.88169	103	27.6727	24.9501	30.3185	31.5209	3.71227	4.11575	3.38938	3.2605	8.69586
all_loops_314	chr1	180390000	180400000	chr1	181400000	181410000	47	21.4237	14.7861	13.4615	22.7362	2.18828	3.16402	3.47307	2.06252	13.4706	59	23.3998	16.7969	15.0954	24.3388	2.51492	3.49768	3.88934	2.41829	14.9561
all_loops_315	chr1	180450000	180460000	chr1	181070000	181080000	61	17.6047	20.9486	23.7703	24.9982	3.45107	2.90281	2.55966	2.43443	12.5495	26	14.2795	14.6746	15.8041	16.1453	1.81508	1.76654	1.64109	1.60661	5.37488
all_loops_316	chr1	180450000	180460000	chr1	181160000	181170000	42	15.6578	14.6655	19.1055	13.1491	2.67169	2.85125	2.19208	3.17758	11.3705	15	11.0789	11.3987	11.4781	11.8647	1.35076	1.31319	1.30419	1.26204	3.92152
all_loops_317	chr1	180450000	180460000	chr1	181400000	181410000	57	16.7437	13.3845	16.0204	20.1738	3.38999	4.23449	3.54209	2.81645	19.231	47	14.786	13.8881	14.2174	23.0779	3.16404	3.36715	3.28971	2.03211	14.8299
all_loops_318	chr1	181160000	181170000	chr1	181400000	181410000	54	21.3587	17.6377	16.637	20.4564	2.52112	3.05001	3.23236	2.63178	4.24944	27	21.0973	18.0145	17.3922	22.2392	1.27846	1.49604	1.54926	1.21312	2.07833
all_loops_319	chr1	181430000	181440000	chr1	181550000	181560000	106	34.7502	26.7083	31.5038	31.2458	3.04446	3.95772	3.35719	3.38483	4.4505	107	32.5767	25.4705	30.4242	30.0961	3.27756	4.18842	3.5087	3.54682	4.80082
all_loops_320	chr1	181570000	181580000	chr1	181660000	181670000	63	32.7116	29.2583	30.3639	32.9346	1.9231	2.14931	2.0713	1.91012	2.44487	44	31.131	29.0094	32.1437	29.8748	1.41206	1.51498	1.36771	1.47123	1.68749
all_loops_321	chr1	181660000	181670000	chr1	181770000	181780000	85	47.6218	37.5858	38.5668	44.1502	1.78325	2.25815	2.20086	1.92316	2.22278	62	45.7651	36.1747	37.8731	37.9091	1.35397	1.71194	1.63537	1.63382	1.71367
all_loops_322	chr1	181720000	181730000	chr1	181770000	181780000	192	94.5756	71.2675	70.0844	97.6312	2.02903	2.6917	2.73707	1.9656	2.56849	162	80.8349	67.7573	59.0044	85.7184	2.00284	2.38884	2.7426	1.88887	2.39846
all_loops_323	chr1	181780000	181790000	chr1	182040000	182050000	97	31.9059	30.0141	44.8252	32.0653	3.03382	3.2244	2.16137	3.01879	8.81175	97	35.1625	32.164	47.8566	32.8086	2.75364	3.00955	2.02475	2.95059	8.97448
all_loops_324	chr1	181780000	181790000	chr1	182140000	182150000	63	25.3049	23.7328	34.3693	28.0032	2.48377	2.64761	1.83061	2.2453	5.31448	59	29.1257	25.1485	30.1612	26.5091	2.02219	2.34074	1.95299	2.22105	5.33265
all_loops_325	chr1	182100000	182110000	chr1	182150000	182160000	111	44.1662	41.0045	47.3959	41.7984	2.50982	2.70287	2.33915	2.65165	3.60273	89	37.873	35.113	38.3726	36.8993	2.3464	2.53032	2.31593	2.40815	3.302
all_loops_326	chr1	182190000	182200000	chr1	182330000	182340000	183	47.7861	34.7816	43.4167	47.1535	3.82366	5.24919	4.20758	3.87484	9.99115	160	39.853	30.8687	39.6116	38.4085	4.00721	5.16974	4.03157	4.15753	10.2046
all_loops_327	chr1	182360000	182370000	chr1	182470000	182480000	154	44.4278	39.2485	48.8388	47.1618	3.46076	3.91628	3.14883	3.26056	5.90098	95	36.9189	34.891	41.6775	41.902	2.56896	2.71784	2.27634	2.26418	3.94346
all_loops_328	chr1	182640000	182650000	chr1	182690000	182700000	181	83.7778	77.564	76.8527	80.4317	2.15909	2.33184	2.35339	2.2488	3.54692	148	74.7076	66.0725	70.4763	71.9248	1.97975	2.23809	2.09844	2.05624	3.10401
all_loops_329	chr1	182830000	182840000	chr1	182900000	182910000	214	72.0975	77.4524	83.3786	106.491	2.96548	2.76072	2.56473	2.00861	4.89927	224	78.6413	77.9614	101.739	108.368	2.84603	2.87082	2.20054	2.06605	5.35629
all_loops_330	chr1	183200000	183210000	chr1	183470000	183480000	100	24.5582	21.1111	24.4648	24.8975	4.05951	4.71922	4.07493	4.0044	10.5339	78	22.8863	20.3692	22.1945	25.6867	3.39768	3.81549	3.50311	3.02869	8.06115
all_loops_331	chr1	183200000	183210000	chr1	183540000	183550000	56	26.5353	18.5462	23.5512	18.0658	2.10623	3.00866	2.37197	3.08823	6.31364	53	25.3449	19.3432	20.5507	21.6413	2.08686	2.73104	2.57134	2.44236	5.6665
all_loops_332	chr1	183320000	183330000	chr1	183470000	183480000	62	22.4135	26.433	29.9239	28.5354	2.75835	2.34048	2.06835	2.16865	4.44662	41	19.9416	22.894	22.9866	25.4725	2.05073	1.78742	1.78025	1.60719	3.02692
all_loops_333	chr1	18350000	18360000	chr1	18960000	18970000	49	11.2842	12.3645	13.5743	14.6558	4.31298	3.93918	3.59068	3.32751	14.2195	15	7.05625	7.4512	8.63371	7.56542	2.11005	1.99968	1.72893	1.96989	3.84794
all_loops_334	chr1	18350000	18360000	chr1	19160000	19170000	48	12.6189	9.21578	11.5959	11.996	3.78178	5.16328	4.11254	3.97653	13.0504	42	11.6774	8.92628	9.97326	10.4486	3.57463	4.66416	4.17938	3.99103	9.88096
all_loops_335	chr1	184300000	184310000	chr1	184470000	184480000	74	25.6514	20.1908	20.8497	25.9623	2.87752	3.65191	3.53705	2.84319	5.17381	64	22.6237	19.4429	20.1607	25.9666	2.82084	3.27996	3.16376	2.45908	4.71558
all_loops_336	chr1	184410000	184420000	chr1	184460000	184470000	104	54.8684	47.0378	53.8517	52.7862	1.89382	2.20842	1.9295	1.96838	2.70709	105	50.9252	45.156	52.8754	45.66	2.05977	2.32234	1.98394	2.29677	2.86505
all_loops_337	chr1	184480000	184490000	chr1	184580000	184590000	67	30.9916	25.1164	28.4861	26.2478	2.15814	2.66096	2.34729	2.5467	2.923	25	29.8586	23.764	24.0111	24.5739	0.837823	1.05179	1.04101	1.01727	1.14162
all_loops_338	chr1	185860000	185870000	chr1	186050000	186060000	84	40.8411	32.4027	38.338	39.5616	2.05417	2.58748	2.18794	2.12044	4.49648	67	37.5464	34.7074	34.948	44.6452	1.78237	1.92775	1.91452	1.4996	3.57903
all_loops_339	chr1	186080000	186090000	chr1	186560000	186570000	111	30.7844	29.7627	44.0189	35.7175	3.59729	3.72036	2.5182	3.10184	13.5797	113	34.6609	36.2037	52.3297	41.2492	3.25365	3.11539	2.15717	2.73524	12.7296
all_loops_340	chr1	186090000	186100000	chr1	186210000	186220000	76	30.9194	29.3023	37.8383	29.8568	2.4533	2.58824	2.00589	2.54032	3.6152	63	32.7087	30.8551	37.9561	33.408	1.92327	2.03843	1.65808	1.88313	2.89847
all_loops_341	chr1	186090000	186100000	chr1	186260000	186270000	93	41.9799	33.3269	47.9207	31.301	2.21246	2.78518	1.93875	2.96488	3.94167	80	41.6305	35.4868	49.2203	31.9757	1.91946	2.25084	1.62408	2.49722	3.49894
all_loops_342	chr1	186270000	186280000	chr1	186560000	186570000	90	40.4304	37.1925	47.7482	42.6375	2.22302	2.41604	1.88304	2.10822	7.69745	73	38.7669	37.6614	46.2668	45.0361	1.88078	1.93584	1.57656	1.61955	6.01855
all_loops_343	chr1	186500000	186510000	chr1	186550000	186560000	108	57.2895	53.3565	59.5307	54.4253	1.88362	2.0222	1.81282	1.98257	2.27715	98	56.9275	49.863	51.9057	56.4815	1.72022	1.96345	1.88633	1.73378	2.28904
all_loops_344	chr1	186790000	186800000	chr1	187010000	187020000	77	25.8254	21.2727	20.5518	27.9424	2.97391	3.60741	3.73333	2.7494	7.40175	48	22.2713	18.9917	20.6315	23.7096	2.15008	2.51942	2.32015	2.0202	4.5535
all_loops_345	chr1	187360000	187370000	chr1	188540000	188550000	23	4.15204	5.23883	5.87984	5.05105	5.43268	4.32679	3.86298	4.48452	15.2488	16	4.17079	5.49557	6.95702	6.66635	3.7698	2.87728	2.28142	2.37942	8.56998
all_loops_346	chr1	187500000	187510000	chr1	188000000	188010000	48	18.1469	14.4097	18.1225	13.0201	2.63606	3.31503	2.63959	3.66614	6.93967	37	19.3836	15.9903	20.7193	12.9455	1.90416	2.30573	1.782	2.8439	5.19166
all_loops_347	chr1	187500000	187510000	chr1	188540000	188550000	65	4.79173	7.75755	8.91927	11.6608	13.3082	8.28503	7.21788	5.53536	38.6261	52	6.44492	8.30339	10.3877	9.49711	7.96037	6.19988	4.96771	5.42872	24.8041
all_loops_348	chr1	188000000	188010000	chr1	188210000	188220000	94	46.2586	44.1407	53.316	44.6459	2.02983	2.127	1.76164	2.10299	3.55447	73	39.5655	38.7494	43.6257	38.6424	1.84291	1.88163	1.67178	1.88682	2.97443
all_loops_349	chr1	188000000	188010000	chr1	188530000	188540000	124	26.1118	25.5863	31.9302	33.9272	4.73451	4.83137	3.87447	3.64708	15.765	131	28.331	27.653	36.1812	36.216	4.61117	4.72382	3.61344	3.60998	17.1691
all_loops_350	chr1	188210000	188220000	chr1	188530000	188540000	70	28.0412	22.9759	23.6931	29.576	2.49101	3.0378	2.94623	2.36218	6.02174	53	26.7027	23.4337	22.413	31.6069	1.98114	2.25634	2.35864	1.67471	4.64291
all_loops_351	chr1	188430000	188440000	chr1	188520000	188530000	85	41.4976	40.0404	45.391	46.7914	2.04579	2.12006	1.8707	1.81483	2.65701	34	35.4452	37.017	45.1858	42.0874	0.959341	0.918715	0.752996	0.808298	1.21925
all_loops_352	chr1	188650000	188660000	chr1	188780000	188790000	103	38.2054	36.7192	45.5188	39.5675	2.69153	2.80017	2.26003	2.59911	3.33197	94	40.966	39.0306	45.7422	41.3257	2.29143	2.40477	2.05269	2.27154	2.93458
all_loops_353	chr1	190840000	190850000	chr1	191400000	191410000	63	21.575	20.9807	29.5769	21.4214	2.91119	2.99326	2.12623	2.93197	11.5906	32	17.5695	18.9013	24.9441	18.4938	1.81669	1.68936	1.28174	1.72638	5.33463
all_loops_354	chr1	191530000	191540000	chr1	191690000	191700000	103	44.3792	37.0921	54.7646	33.2301	2.31794	2.77209	1.87917	3.0933	5.03464	82	47.9646	38.8819	55.7621	37.6175	1.70812	2.10611	1.46969	2.17671	4.46156
all_loops_355	chr1	191710000	191720000	chr1	191790000	191800000	150	42.9048	42.2465	48.3772	60.0366	3.49031	3.54456	3.0963	2.49598	3.72847	135	33.9087	32.7765	42.7438	56.1014	3.97251	4.10932	3.15331	2.40385	3.68335
all_loops_356	chr1	191860000	191870000	chr1	192620000	192630000	51	14.9781	14.9328	17.9968	19.2595	3.38901	3.39923	2.8237	2.63953	13.83	29	10.9072	10.0821	9.05521	13.5516	2.64373	2.85795	3.17852	2.13161	8.72748
all_loops_357	chr1	19190000	19200000	chr1	19770000	19780000	48	23.2411	19.1793	22.8568	21.1834	2.06075	2.4949	2.09524	2.25998	8.49577	29	16.394	15.4914	16.3751	17.5134	1.76428	1.86642	1.7663	1.65215	5.10847
all_loops_358	chr1	19190000	19200000	chr1	19960000	19970000	134	25.1119	18.3827	24.4808	22.0903	5.31891	7.25545	5.45547	6.04318	36.3432	82	20.2428	17.2806	24.3567	18.1283	4.03582	4.72367	3.35696	4.504	21.4796
all_loops_359	chr1	192650000	192660000	chr1	192700000	192710000	232	89.5134	78.2639	87.7228	77.2622	2.59001	2.96182	2.64282	3.00017	3.54698	176	77.1659	75.8224	81.9643	75.1707	2.27914	2.31947	2.14588	2.33956	3.02898
all_loops_360	chr1	192760000	192770000	chr1	192900000	192910000	84	41.3826	30.593	41.5059	32.0011	2.02736	2.74004	2.02135	2.61985	3.74879	76	40.5679	30.4462	40.0856	28.6805	1.87126	2.49131	1.89371	2.64415	3.39347
all_loops_361	chr1	192910000	192920000	chr1	193090000	193100000	72	24.6102	20.6884	24.9109	28.9971	2.91783	3.46828	2.88275	2.47791	4.90716	52	26.12	22.9277	28.1069	29.3974	1.98703	2.2625	1.84707	1.76625	3.48818
all_loops_362	chr1	193000000	193010000	chr1	193100000	193110000	129	64.5981	56.4566	62.7404	73.1185	1.99542	2.28267	2.05441	1.76321	3.86356	136	60.5612	57.0368	60.4693	69.9694	2.24361	2.382	2.24701	1.94236	4.12339
all_loops_363	chr1	193170000	193180000	chr1	193390000	193400000	201	94.5877	61.0664	57.3304	109.338	2.12382	3.28775	3.50163	1.83758	9.94386	168	83.7401	56.7123	53.3719	110.59	2.00501	2.95887	3.1437	1.51866	8.51023
all_loops_364	chr1	193210000	193220000	chr1	193380000	193390000	259	61.69	56.8749	60.5706	91.5812	4.19324	4.54762	4.2706	2.8261	11.5867	241	61.3336	54.4146	52.5585	88.0541	3.92456	4.42267	4.57855	2.73498	11.1424
all_loops_365	chr1	193410000	193420000	chr1	193630000	193640000	148	48.0903	32.2825	57.6757	38.3439	3.07323	4.57345	2.56336	3.85236	10.231	151	50.0515	34.091	54.0783	38.6803	3.01287	4.41929	2.78894	3.8963	10.3284
all_loops_366	chr1	193550000	193560000	chr1	193630000	193640000	79	41.0608	32.8284	36.4494	40.7114	1.92173	2.40218	2.16419	1.93819	3.01947	50	44.0496	35.9512	32.8747	43.8834	1.13478	1.38969	1.51935	1.13907	1.96016
all_loops_367	chr1	193660000	193670000	chr1	193730000	193740000	156	60.9518	61.011	82.5954	54.867	2.55685	2.55437	1.88765	2.83989	4.37716	115	49.8053	49.474	58.1665	43.3697	2.30637	2.32178	1.97541	2.64782	3.68097
all_loops_368	chr1	193660000	193670000	chr1	193920000	193930000	78	25.9574	22.3662	28.5805	28.0507	2.99723	3.47633	2.72311	2.77435	6.34541	58	19.9677	19.4357	29.9064	21.2346	2.89519	2.97405	1.93625	2.72327	5.12024
all_loops_369	chr1	194010000	194020000	chr1	194420000	194430000	85	26.3912	28.6166	38.8464	30.3752	3.21239	2.96344	2.18505	2.79244	12.9823	77	25.8724	25.8969	30.4912	26.8713	2.96854	2.96574	2.52033	2.85859	12.0797
all_loops_370	chr1	194010000	194020000	chr1	194530000	194540000	79	17.1602	17.3127	20.4205	21.0355	4.58281	4.54265	3.85469	3.74252	19.7123	61	17.6931	17.1213	19.855	19.0699	3.43391	3.54793	3.06188	3.18729	15.5156
all_loops_371	chr1	194420000	194430000	chr1	194530000	194540000	92	33.1741	31.2498	32.4929	42.7111	2.76792	2.93782	2.82577	2.15131	3.45293	77	31.5196	28.3824	29.2226	36.8292	2.43836	2.70693	2.62937	2.08778	3.16714
all_loops_372	chr1	194480000	194490000	chr1	194530000	194540000	124	57.0684	54.7968	57.8193	59.0843	2.17078	2.26061	2.14264	2.09684	2.49808	52	42.2443	43.4419	43.5502	46.0335	1.23039	1.19655	1.19358	1.12933	1.23509
all_loops_373	chr1	194550000	194560000	chr1	194730000	194740000	59	28.8535	21.513	22.6807	30.4153	2.04121	2.73446	2.5943	1.93673	4.78104	49	27.9071	21.2734	22.4116	28.7248	1.75312	2.29725	2.1811	1.70339	4.04264
all_loops_374	chr1	194610000	194620000	chr1	194730000	194740000	138	50.8496	57.1936	72.3968	69.1412	2.71052	2.41039	1.90491	1.99448	4.41261	108	49.3209	52.8713	63.6793	60.8384	2.18733	2.04073	1.69491	1.77392	3.6809
all_loops_375	chr1	194820000	194830000	chr1	194940000	194950000	124	44.3008	41.2224	54.4118	46.2925	2.79499	3.00321	2.27657	2.675	5.16438	88	36.7892	36.4603	46.9319	40.0611	2.38823	2.40972	1.8732	2.19366	3.79534
all_loops_376	chr1	195030000	195040000	chr1	195080000	195090000	186	98.1943	83.593	92.7286	81.8056	1.89329	2.2236	2.00477	2.27213	2.83952	87	65.1141	60.6675	63.9971	55.9945	1.3356	1.43333	1.35888	1.55274	1.6342
all_loops_377	chr1	195030000	195040000	chr1	195150000	195160000	123	47.7787	50.0511	54.9125	72.3492	2.57108	2.45458	2.23767	1.69912	3.99336	65	38.481	41.2236	37.4339	56.5598	1.68736	1.57537	1.73443	1.14896	2.39946
all_loops_378	chr1	195080000	195090000	chr1	195140000	195150000	187	76.6401	73.2301	79.3445	87.7743	2.4381	2.55148	2.3551	2.12918	3.85572	132	58.7541	58.4953	65.9198	67.2609	2.24453	2.25445	2.00092	1.96108	3.0927
all_loops_379	chr1	195080000	195090000	chr1	195190000	195200000	108	43.0103	43.2784	68.8293	45.0433	2.50752	2.49202	1.56827	2.3946	3.8604	83	37.6296	37.0529	56.8624	39.1826	2.20252	2.2367	1.45886	2.11544	3.37093
all_loops_380	chr1	195150000	195160000	chr1	195200000	195210000	173	61.2775	46.0048	55.924	50.0086	2.82025	3.75449	3.08975	3.4545	4.15084	155	49.2694	41.7472	45.4457	45.7698	3.14162	3.70634	3.40537	3.38131	4.08471
all_loops_381	chr1	195210000	195220000	chr1	195260000	195270000	130	67.416	52.3972	62.5493	61.9724	1.92695	2.47823	2.07664	2.09594	2.56895	94	54.5709	48.2909	56.6064	54.1244	1.72121	1.94458	1.65943	1.73538	2.08985
all_loops_382	chr1	195210000	195220000	chr1	195330000	195340000	65	22.4893	25.0513	35.9703	24.2408	2.8819	2.58833	1.80481	2.67452	2.57526	55	23.8643	24.4879	33.3317	26.9219	2.29925	2.24094	1.64814	2.03909	2.41722
all_loops_383	chr1	195210000	195220000	chr1	195400000	195410000	61	20.3934	18.2764	22.4736	26.1404	2.98144	3.32492	2.70671	2.32847	4.35506	45	16.1832	16.3127	19.4035	21.7249	2.76972	2.74787	2.3124	2.06645	3.55275
all_loops_384	chr1	195210000	195220000	chr1	196050000	196060000	22	3.81581	3.24742	3.26705	3.93703	5.64379	6.60211	6.56361	5.47432	9.6483	10	3.84641	3.63619	3.72908	4.34148	2.55929	2.70329	2.63771	2.27401	4.11916
all_loops_385	chr1	195330000	195340000	chr1	195410000	195420000	109	48.2279	47.8182	54.9082	59.0735	2.25749	2.2768	1.98334	1.84373	3.44231	83	36.1336	39.2554	43.6145	41.4293	2.29345	2.11153	1.90097	2.001	2.94225
all_loops_386	chr1	196430000	196440000	chr1	196780000	196790000	32	7.7083	11.3286	11.7404	12.4028	4.11101	2.80875	2.71106	2.56743	3.10583	22	8.23195	13.3555	14.9589	14.5541	2.65244	1.64245	1.46757	1.50811	2.07579
all_loops_387	chr1	196440000	196450000	chr1	196540000	196550000	200	75.6448	61.071	86.7768	70.886	2.64176	3.27116	2.30326	2.81887	5.22194	178	79.4145	65.4324	85.656	70.2757	2.23984	2.71774	2.07682	2.5307	4.83336
all_loops_388	chr1	196440000	196450000	chr1	196950000	196960000	28	9.12671	8.33495	8.52288	8.44257	3.04551	3.33138	3.25877	3.28941	3.07222	15	12.1566	11.5162	11.8142	12.4608	1.23199	1.29991	1.26739	1.20215	1.49197
all_loops_389	chr1	196580000	196590000	chr1	196780000	196790000	67	24.3956	23.8253	22.9871	35.2369	2.73927	2.80456	2.90638	1.89887	3.12889	65	27.5236	27.8147	26.1975	44.0939	2.35668	2.33211	2.47552	1.47305	3.0507
all_loops_390	chr1	196660000	196670000	chr1	196780000	196790000	165	61.3535	56.5605	52.7263	104.637	2.68658	2.91385	3.12534	1.57633	4.27545	165	56.7863	60.1321	56.0921	108.635	2.90228	2.74106	2.93813	1.51837	4.01109
all_loops_391	chr1	196700000	196710000	chr1	196780000	196790000	266	105.708	90.3889	84.6131	114.667	2.51493	2.94069	3.14119	2.31861	4.46378	246	94.2695	85.7234	73.0033	117.549	2.60783	2.86752	3.36647	2.09181	4.08372
all_loops_392	chr1	196800000	196810000	chr1	196850000	196860000	160	80.8166	67.9779	83.5604	72.1605	1.97858	2.35172	1.91369	2.21559	2.59486	145	77.4174	70.4409	84.5032	76.9753	1.87184	2.05696	1.71506	1.88257	2.41059
all_loops_393	chr1	19770000	19780000	chr1	19960000	19970000	52	27.952	25.9738	26.0915	27.182	1.85727	1.99817	1.9892	1.90968	2.36601	45	23.4954	22.8632	24.0869	24.2321	1.91139	1.96401	1.86465	1.85352	2.18078
all_loops_394	chr1	20600000	20610000	chr1	20730000	20740000	119	44.5039	46.1538	69.2451	46.1758	2.67017	2.57492	1.7175	2.5737	4.46374	95	43.7005	43.8098	66.023	43.8088	2.17121	2.1658	1.43823	2.16585	3.77161
all_loops_395	chr1	20600000	20610000	chr1	20780000	20790000	63	27.9772	25.6148	36.0169	29.0561	2.24737	2.45384	1.7471	2.16421	4.38147	79	26.4275	23.8422	33.4198	25.6489	2.98181	3.30379	2.3598	3.07198	6.04625
all_loops_396	chr1	20680000	20690000	chr1	20780000	20790000	91	36.325	36.7732	39.1932	44.8384	2.50103	2.47063	2.31847	2.02722	4.02803	47	29.97	31.7759	31.6066	36.4288	1.56635	1.4776	1.48549	1.28939	2.31139
all_loops_397	chr1	20920000	20930000	chr1	21150000	21160000	159	51.778	42.2283	57.527	38.9799	3.06681	3.75872	2.76086	4.07115	10.2228	153	46.0921	35.0648	46.9584	33.472	3.31442	4.35379	3.25341	4.56035	10.6094
all_loops_398	chr1	20930000	20940000	chr1	21080000	21090000	81	30.5159	36.1815	47.3537	33.7033	2.64895	2.2353	1.70903	2.39917	5.24012	60	29.0772	34.0672	40.2747	37.9804	2.05983	1.759	1.48856	1.57824	3.83508
all_loops_399	chr1	21150000	21160000	chr1	21200000	21210000	219	68.9577	63.1368	84.0293	51.7129	3.17271	3.46476	2.60433	4.22868	3.11099	136	53.9009	50.1979	67.2669	41.9773	2.52033	2.70588	2.02028	3.23452	2.22642
all_loops_400	chr1	21150000	21160000	chr1	21250000	21260000	110	33.5006	41.7075	42.8683	60.8116	3.27673	2.6335	2.56236	1.80754	2.81171	113	30.3554	38.4986	40.6675	54.8832	3.71363	2.93016	2.77427	2.05699	3.26795
all_loops_401	chr1	21190000	21200000	chr1	22250000	22260000	35	4.70807	6.82251	8.70055	10.815	7.30023	5.07042	3.98839	3.21575	13.7177	27	4.15254	6.3484	7.37742	11.1476	6.37266	4.20259	3.62425	2.4094	9.50813
all_loops_402	chr1	21200000	21210000	chr1	21250000	21260000	227	106.615	85.0489	91.3141	107.573	2.12811	2.66709	2.4843	2.10917	3.02628	203	86.4628	73.1729	76.0749	89.0503	2.34627	2.77183	2.66623	2.27817	3.17633
all_loops_403	chr1	21400000	21410000	chr1	21960000	21970000	84	42.8372	32.7002	36.7621	38.8462	1.95867	2.56401	2.28147	2.15939	11.8671	71	29.7314	26.7844	32.5697	28.5788	2.3834	2.64466	2.17633	2.47918	10.119
all_loops_404	chr1	21400000	21410000	chr1	22250000	22260000	99	14.7866	17.7993	19.3623	24.6901	6.65698	5.53653	5.0919	3.99756	30.7123	74	12.5085	15.1311	18.079	18.8471	5.87699	4.86505	4.07614	3.9109	21.7703
all_loops_405	chr1	21950000	21960000	chr1	22250000	22260000	35	12.177	10.9436	9.996	13.5514	2.85901	3.17832	3.47662	2.57116	5.05003	14	9.46071	8.90702	8.38217	11.3889	1.47479	1.56545	1.66231	1.22728	2.12386
all_loops_406	chr1	22610000	22620000	chr1	23140000	23150000	120	27.0052	23.3907	32.7129	28.4177	4.43088	5.11266	3.66014	4.21143	17.9309	85	22.1396	20.8244	27.6754	26.2638	3.82651	4.06701	3.06386	3.22791	13.0888
all_loops_407	chr1	22610000	22620000	chr1	23290000	23300000	64	22.0377	24.559	37.3408	20.4865	2.89551	2.59946	1.71204	3.11369	8.64067	66	24.7265	22.6289	32.2453	24.4118	2.66248	2.9082	2.04358	2.69666	8.86486
all_loops_408	chr1	23170000	23180000	chr1	23260000	23270000	142	72.5779	69.9838	84.3782	75.8368	1.9552	2.02757	1.68209	1.87129	3.21367	124	59.0335	61.3199	76.7369	63.9403	2.09864	2.02052	1.61511	1.93784	2.97287
all_loops_409	chr1	23330000	23340000	chr1	23490000	23500000	45	18.7774	17.2426	17.1426	22.1942	2.3891	2.60053	2.61562	2.02295	2.98348	19	13.6204	12.2211	14.3997	13.7381	1.39209	1.55019	1.31727	1.38024	1.47305
all_loops_410	chr1	23710000	23720000	chr1	23800000	23810000	34	12.0678	11.3336	13.2604	12.2652	2.80249	2.98245	2.55231	2.75774	2.65985	7	10.0025	9.4812	8.71116	8.85267	0.702799	0.741034	0.805796	0.793059	0.66746
all_loops_411	chr1	23830000	23840000	chr1	24170000	24180000	36	13.2966	11.3781	14.6996	11.9222	2.69471	3.14511	2.43926	3.00279	3.74765	38	18.1843	15.8404	18.6585	17.4669	2.08375	2.39016	2.03108	2.16885	3.6407
all_loops_412	chr1	23830000	23840000	chr1	24250000	24260000	28	6.60633	5.89412	6.14094	7.12772	4.19007	4.68793	4.50253	3.88781	4.83607	16	8.33849	7.01584	8.29854	7.65536	1.90793	2.26256	1.917	2.07598	2.75468
all_loops_413	chr1	23840000	23850000	chr1	24030000	24040000	72	35.8068	29.3607	30.1051	39.2036	2.00797	2.44733	2.38701	1.83444	3.98221	51	30.3933	26.3806	31.3686	32.0648	1.67578	1.92971	1.62384	1.58869	2.85506
all_loops_414	chr1	23920000	23930000	chr1	24010000	24020000	135	57.8952	61.8313	69.7653	71.7853	2.3295	2.18145	1.93372	1.87938	3.26246	117	48.7505	51.1718	55.1115	60.9654	2.39711	2.28391	2.12094	1.91762	3.11796
all_loops_415	chr1	24140000	24150000	chr1	24250000	24260000	111	25.0658	22.609	24.623	33.9103	4.41472	4.89233	4.49379	3.26666	5.28968	49	16.3554	13.9641	14.0306	20.1281	2.98382	3.49117	3.47473	2.42731	2.72381
all_loops_416	chr1	24370000	24380000	chr1	25670000	25680000	33	6.49162	6.07587	6.55019	6.01688	5.02153	5.35957	4.9773	5.41125	23.3996	18	4.94161	4.4024	4.80047	5.24651	3.59013	4.02008	3.69352	3.38538	11.3567
all_loops_417	chr1	25560000	25570000	chr1	25670000	25680000	55	19.9536	18.2876	18.0634	18.9825	2.74764	2.99658	3.03357	2.88747	2.90612	36	17.0284	15.5693	14.7635	14.1462	2.10761	2.30387	2.42877	2.53401	2.0364
all_loops_418	chr1	30800000	30810000	chr1	31210000	31220000	89	28.3448	28.3875	28.2546	46.174	3.13239	3.12769	3.14235	1.92549	7.97485	83	33.7257	29.6571	30.0232	51.4658	2.45671	2.79261	2.75867	1.61153	7.71769
all_loops_419	chr1	30830000	30840000	chr1	31210000	31220000	95	16.1045	20.6123	20.49	38.7003	5.86874	4.59148	4.61875	2.45101	10.9573	111	16.3945	20.4277	20.8526	35.2929	6.73558	5.41221	5.30245	3.13904	13.0474
all_loops_420	chr1	30840000	30850000	chr1	30990000	31000000	108	42.4693	41.1684	40.8474	58.8678	2.53939	2.61944	2.63997	1.83321	3.78764	89	38.5947	38.389	41.8593	55.8253	2.30264	2.31495	2.12348	1.5932	3.6075
all_loops_421	chr1	30930000	30940000	chr1	30980000	30990000	144	66.7622	64.2333	79.8232	67.2129	2.15518	2.2399	1.80298	2.14075	2.22211	119	65.0041	65.6033	74.4412	72.5216	1.82938	1.81269	1.59777	1.64001	2.00458
all_loops_422	chr1	31000000	31010000	chr1	31210000	31220000	123	55.5314	35.7333	37.4724	48.6197	2.21278	3.43535	3.27634	2.5267	5.78922	78	43.2955	30.1157	28.5539	41.0651	1.79973	2.58475	2.72564	1.89724	4.17906
all_loops_423	chr1	31260000	31270000	chr1	31390000	31400000	73	22.8947	20.6158	20.7449	24.9078	3.179	3.5287	3.50686	2.92309	3.2864	71	20.1905	17.941	19.7479	21.101	3.5041	3.94103	3.58223	3.35362	3.17295
all_loops_424	chr1	33740000	33750000	chr1	33790000	33800000	178	56.6656	54.3173	60.3842	59.0665	3.13746	3.27286	2.94457	3.01015	3.40698	151	52.1508	53.786	56.9856	57.3126	2.89182	2.80407	2.6469	2.63183	3.22462
all_loops_425	chr1	33740000	33750000	chr1	34020000	34030000	34	9.72733	10.3685	11.8338	10.7496	3.46992	3.25739	2.85743	3.14299	3.11456	28	12.5799	13.1637	15.9487	16.2914	2.2161	2.11856	1.75092	1.71431	2.75441
all_loops_426	chr1	33940000	33950000	chr1	34020000	34030000	103	38.5558	35.7101	38.8977	43.0668	2.66713	2.87907	2.64375	2.38841	3.90299	45	26.5139	25.842	26.0789	24.6006	1.69461	1.73849	1.72276	1.82587	1.84107
all_loops_427	chr1	34060000	34070000	chr1	34220000	34230000	70	32.8582	25.442	35.8817	33.1321	2.12694	2.7445	1.94821	2.10941	3.97814	82	34.1163	25.0942	36.8753	27.7445	2.39944	3.25869	2.2204	2.94851	4.91225
all_loops_428	chr1	34170000	34180000	chr1	34220000	34230000	141	51.9983	49.546	51.6353	54.3671	2.70834	2.84212	2.72735	2.59055	3.4871	136	46.3786	48.2257	48.4206	48.3537	2.92823	2.81631	2.805	2.80887	3.91784
all_loops_429	chr1	34270000	34280000	chr1	34460000	34470000	34	10.8737	11.9507	11.5448	15.5479	3.10744	2.82972	2.92834	2.1792	2.52331	18	6.7476	8.91149	10.6358	7.97396	2.64326	2.00855	1.68595	2.24178	1.46493
all_loops_430	chr1	36380000	36390000	chr1	36540000	36550000	70	37.9209	32.2645	35.5777	37.6934	1.84373	2.16595	1.96481	1.85482	4.55269	46	28.7272	27.9497	32.6634	32.6651	1.59919	1.64351	1.40706	1.40699	3.02592
all_loops_431	chr1	36420000	36430000	chr1	36520000	36530000	123	49.5354	65.6456	69.4227	61.7537	2.48009	1.87237	1.77064	1.99018	4.1632	72	37.9612	48.8085	54.1036	47.676	1.89432	1.47418	1.33017	1.50912	2.64244
all_loops_432	chr1	36600000	36610000	chr1	36730000	36740000	111	39.8533	33.0513	52.3966	35.1518	2.78075	3.35131	2.11633	3.15161	5.89635	69	34.3572	30.5916	45.1816	29.4789	2.00538	2.25143	1.52601	2.33613	3.7638
all_loops_433	chr1	36610000	36620000	chr1	36690000	36700000	145	63.2927	73.3651	91.5212	72.3158	2.28891	1.97509	1.58369	2.00371	3.68241	119	61.1869	60.9193	64.6441	63.114	1.94332	1.95184	1.83955	1.88408	3.28093
all_loops_434	chr1	36840000	36850000	chr1	37300000	37310000	65	13.1633	14.4766	15.3437	22.0288	4.90829	4.46605	4.21531	2.94186	13.9752	30	8.39833	10.8592	12.1196	13.1876	3.54187	2.74654	2.46326	2.26527	6.25502
all_loops_435	chr1	37320000	37330000	chr1	37450000	37460000	78	34.1056	28.291	33.0167	31.7323	2.28326	2.75088	2.35833	2.45348	4.08228	75	28.7894	25.274	30.7533	27.3317	2.59957	2.95972	2.4341	2.73771	4.31878
all_loops_436	chr1	37320000	37330000	chr1	37690000	37700000	59	14.3311	13.6938	17.4527	16.503	4.09533	4.28454	3.367	3.5596	6.8572	37	10.5062	13.0462	20.0227	13.6698	3.49796	2.82211	1.84369	2.69429	4.38587
all_loops_437	chr1	37510000	37520000	chr1	37690000	37700000	51	22.4568	18.4257	19.4341	22.6573	2.26539	2.75833	2.61593	2.24544	3.72402	18	14.4138	13.3331	15.371	14.9512	1.24709	1.34742	1.16993	1.20256	1.40707
all_loops_438	chr1	37730000	37740000	chr1	37920000	37930000	76	32.1554	24.0964	32.5262	28.8623	2.35929	3.1451	2.33248	2.62756	4.21042	66	25.6841	20.0597	26.1606	22.7294	2.5636	3.27882	2.51708	2.89538	3.96447
all_loops_439	chr1	37990000	38000000	chr1	38040000	38050000	180	87.4737	92.8784	95.9131	108.856	2.05655	1.93701	1.87579	1.65296	2.67718	135	74.2598	83.0611	81.3195	91.0017	1.81684	1.62456	1.65931	1.48296	2.24186
all_loops_440	chr1	38240000	38250000	chr1	38840000	38850000	34	10.0811	9.69691	11.5215	9.66169	3.34935	3.48069	2.93421	3.49325	9.46706	16	8.14819	7.41996	8.71828	7.6551	1.95194	2.14097	1.82575	2.07605	4.1099
all_loops_441	chr1	38240000	38250000	chr1	38910000	38920000	35	10.8049	10.531	14.3472	10.7254	3.21872	3.30168	2.42954	3.24238	9.70098	9	9.81517	8.35047	10.7177	7.32415	0.917785	1.07686	0.841213	1.22573	2.25578
all_loops_442	chr1	39060000	39070000	chr1	39390000	39400000	115	22.1449	21.4028	34.1253	26.5363	5.17422	5.35278	3.363	4.32117	13.0009	72	20.2744	19.1441	27.651	23.4373	3.53876	3.74661	2.59811	3.06322	8.67908
all_loops_443	chr1	39060000	39070000	chr1	39580000	39590000	80	12.4044	12.0051	18.9644	12.7053	6.40572	6.61704	4.20155	6.2552	10.1046	75	14.6669	13.3983	20.712	14.4741	5.08572	5.56365	3.6085	5.15296	10.1536
all_loops_444	chr1	39440000	39450000	chr1	39580000	39590000	155	60.7716	43.2305	61.7429	46.3348	2.54799	3.57947	2.50797	3.34017	5.49411	122	45.8808	34.51	47.972	39.4848	2.65545	3.52789	2.53994	3.08452	5.14028
all_loops_445	chr1	39740000	39750000	chr1	39810000	39820000	65	28.4341	27.0349	27.1145	27.9357	2.28148	2.39912	2.39211	2.32204	2.5847	58	23.3727	23.7303	27.6548	25.6555	2.47522	2.43807	2.09333	2.25583	2.48396
all_loops_446	chr1	39740000	39750000	chr1	40040000	40050000	38	15.3106	12.9991	16.9636	13.7943	2.47232	2.90861	2.23282	2.74213	6.36339	40	14.7144	12.2482	19.4058	12.8734	2.70682	3.24744	2.0558	3.09095	6.90723
all_loops_447	chr1	39810000	39820000	chr1	39950000	39960000	77	32.0413	33.7692	43.6079	36.228	2.39878	2.27641	1.76398	2.12233	4.35845	66	29.6063	31.2578	41.6509	30.2624	2.22512	2.10793	1.5832	2.17703	3.88652
all_loops_448	chr1	39810000	39820000	chr1	39990000	40000000	86	28.5548	29.2941	42.3897	28.2638	3.00473	2.92916	2.02637	3.03556	6.1846	62	24.6469	26.1667	42.2394	22.9536	2.5094	2.36421	1.46672	2.69372	4.8516
all_loops_449	chr1	40050000	40060000	chr1	40430000	40440000	35	12.7352	9.11946	8.40025	12.7213	2.73467	3.80716	4.12929	2.73762	6.11069	16	11.6924	8.94276	9.50513	13.6186	1.36529	1.78043	1.67619	1.17359	2.69065
all_loops_450	chr1	40170000	40180000	chr1	40430000	40440000	74	16.7769	15.2571	17.6679	18.3095	4.39062	4.82512	4.17045	4.0251	10.1057	92	18.6319	16.4125	19.0113	18.8787	4.91675	5.5776	4.81913	4.8528	12.5833
all_loops_451	chr1	40170000	40180000	chr1	40590000	40600000	40	8.02434	10.901	10.8205	15.0789	4.93579	3.64513	3.67201	2.64182	6.44314	36	8.95561	12.1078	14.1527	17.3591	3.98648	2.95713	2.53285	2.06769	5.55818
all_loops_452	chr1	40440000	40450000	chr1	40590000	40600000	107	36.3463	31.055	38.2658	36.7824	2.93857	3.43765	2.79155	2.90383	4.62431	115	33.8895	30.4702	34.2409	36.8226	3.38633	3.76511	3.35169	3.11733	4.85968
all_loops_453	chr1	40440000	40450000	chr1	40710000	40720000	30	9.58073	8.25317	8.63915	8.58615	3.10927	3.60342	3.44427	3.46528	3.07924	4	7.32406	6.77324	6.75471	6.88159	0.552259	0.596517	0.598129	0.587259	0.405023
all_loops_454	chr1	40630000	40640000	chr1	40900000	40910000	31	11.6939	8.44786	10.5643	10.3683	2.63696	3.63834	2.91626	2.97089	2.81818	18	8.82286	7.65377	9.93041	6.75739	2.0285	2.33435	1.80451	2.63949	1.6931
all_loops_455	chr1	41200000	41210000	chr1	42290000	42300000	34	7.34125	7.9895	7.85196	7.82348	4.58256	4.21534	4.28825	4.30366	16.6732	15	7.84466	8.90908	9.38994	10.9832	1.90065	1.67609	1.59116	1.36242	6.23066
all_loops_456	chr1	41200000	41210000	chr1	42740000	42750000	34	7.43614	8.67292	9.21646	11.4524	4.52486	3.88696	3.66019	2.95177	24.2618	7	6.23126	6.58128	7.0824	6.58313	1.12142	1.06267	0.988528	1.06238	4.50121
all_loops_457	chr1	42970000	42980000	chr1	43120000	43130000	88	33.2951	30.1931	47.418	30.8611	2.63811	2.90825	1.85403	2.84551	3.65558	46	26.7737	24.4355	34.64	25.304	1.71543	1.87891	1.327	1.81468	2.0627
all_loops_458	chr1	42970000	42980000	chr1	43160000	43170000	103	28.1932	26.9914	46.4053	21.6984	3.64399	3.80563	2.21695	4.7297	3.94214	71	21.9835	21.4443	31.2621	18.0324	3.2196	3.30018	2.26707	3.92116	3.05409
all_loops_459	chr1	43200000	43210000	chr1	43310000	43320000	206	56.6545	50.6973	56.9365	72.922	3.63143	4.0573	3.61348	2.82244	5.89834	191	61.3463	55.4975	59.0761	80.048	3.11003	3.4372	3.22934	2.38434	5.58758
all_loops_460	chr1	43200000	43210000	chr1	43790000	43800000	31	11.575	10.4857	10.8873	13.1364	2.66381	2.93792	2.83054	2.34959	6.02781	15	10.1352	9.88732	10.0797	12.5098	1.47529	1.51192	1.48334	1.19748	2.77752
all_loops_461	chr1	43350000	43360000	chr1	43790000	43800000	69	14.5692	12.1834	15.7323	17.5919	4.71055	5.62549	4.36449	3.90574	14.194	57	13.9191	11.754	13.1967	15.5805	4.07301	4.81695	4.29431	3.64147	12.1235
all_loops_462	chr1	43360000	43370000	chr1	43500000	43510000	112	53.9495	50.205	67.1288	53.3505	2.07403	2.22841	1.66744	2.09727	3.77522	93	46.1379	44.5494	57.3697	49.9578	2.0135	2.08513	1.61998	1.85985	3.505
all_loops_463	chr1	43810000	43820000	chr1	43950000	43960000	122	39.0328	32.0044	39.26	35.3135	3.12015	3.80321	3.10214	3.44784	5.06466	76	30.871	28.7287	40.3314	29.59	2.45713	2.63973	1.8822	2.56315	3.37083
all_loops_464	chr1	43810000	43820000	chr1	44090000	44100000	57	22.8934	20.7059	28.3507	19.7707	2.48332	2.74442	2.00698	2.87357	4.89552	41	18.4501	18.457	23.4537	19.8333	2.21562	2.2148	1.74495	2.06188	3.5777
all_loops_465	chr1	43810000	43820000	chr1	44120000	44130000	75	38.1215	27.6644	40.7866	30.5866	1.96486	2.7049	1.83679	2.44732	4.57418	74	33.7252	27.0685	39.115	31.1991	2.19068	2.72743	1.88958	2.36748	4.52042
all_loops_466	chr1	43950000	43960000	chr1	44120000	44130000	128	47.4805	42.6721	45.7183	50.9553	2.69228	2.99494	2.79582	2.50904	5.68747	99	45.1431	39.9175	47.8129	39.6183	2.19039	2.47641	2.06834	2.49507	4.5756
all_loops_467	chr1	44800000	44810000	chr1	45370000	45380000	72	15.1201	15.3114	16.4752	16.8644	4.73717	4.67835	4.34988	4.25007	14.9415	36	12.2501	11.2084	11.4761	13.8522	2.92305	3.19233	3.1185	2.58741	6.68498
all_loops_468	chr1	44800000	44810000	chr1	45680000	45690000	30	5.71738	6.85641	6.4584	6.10822	5.17415	4.32695	4.58953	4.84841	13.0772	13	4.463	5.53821	5.98137	5.10917	2.87092	2.32343	2.15412	2.51479	4.95584
all_loops_469	chr1	4500000	4510000	chr1	4750000	4760000	102	30.3874	25.7726	32.4974	32.3542	3.34892	3.94627	3.13216	3.14597	6.52133	70	30.589	26.4914	28.2927	36.5067	2.28421	2.63619	2.46894	1.91495	4.70455
all_loops_470	chr1	45480000	45490000	chr1	45810000	45820000	39	13.278	11.2215	14.2043	14.6431	2.92271	3.4536	2.73344	2.65209	5.50686	34	11.0236	9.77792	12.5235	12.0012	3.06554	3.45214	2.70131	2.81791	4.61022
all_loops_471	chr1	45490000	45500000	chr1	45680000	45690000	43	12.4291	12.9973	17.998	14.0135	3.43999	3.29076	2.38148	3.05381	4.87069	22	12.2237	12.4743	15.8914	12.1882	1.79329	1.75756	1.38199	1.79847	2.48848
all_loops_472	chr1	45870000	45880000	chr1	46070000	46080000	151	25.9384	24.8781	38.6705	28.5894	5.80296	6.0493	3.89729	5.26675	6.87253	63	20.3259	19.8507	31.3447	22.5644	3.08922	3.1628	2.00669	2.7841	3.0067
all_loops_473	chr1	45880000	45890000	chr1	45980000	45990000	231	68.741	56.4912	70.4108	68.1957	3.35701	4.08368	3.27751	3.38382	5.61393	207	66.7788	54.7171	66.5463	71.9908	3.09665	3.77802	3.10745	2.87276	5.23557
all_loops_474	chr1	45990000	46000000	chr1	46070000	46080000	88	47.6637	41.3288	43.1467	51.1984	1.8445	2.12654	2.03715	1.7174	1.94016	66	38.2172	34.8351	34.5883	43.6405	1.72507	1.89208	1.90554	1.51118	1.59017
all_loops_475	chr1	46110000	46120000	chr1	46470000	46480000	73	24.2097	20.8108	20.7772	31.3784	3.00704	3.4958	3.50143	2.32222	8.14175	55	22.9686	22.4203	21.0137	31.1256	2.38853	2.44668	2.60967	1.76458	5.84782
all_loops_476	chr1	46110000	46120000	chr1	53400000	53410000	23	0.828057	0.612166	0.434267	1.41317	24.8907	32.4363	43.2368	15.266	58.107	17	1.05488	0.760988	0.648129	1.12594	14.8067	19.8609	22.857	13.9485	35.0372
all_loops_477	chr1	46240000	46250000	chr1	46660000	46670000	22	3.58605	4.13992	5.60409	3.98422	5.99559	5.21236	3.87441	5.41108	3.46305	10	4.81957	5.3883	7.05366	5.12436	2.05302	1.84028	1.41187	1.93325	1.45192
all_loops_478	chr1	46240000	46250000	chr1	53620000	53630000	16	0.475683	0.482425	1.82542	0.361875	27.9668	27.643	8.36181	34.8579	80.9216	15	0.499082	0.509043	1.64339	0.301114	25.2052	24.793	8.66127	37.6451	61.4264
all_loops_479	chr1	46420000	46430000	chr1	46850000	46860000	18	2.59651	3.57273	3.58319	3.02772	6.71238	4.92822	4.91422	5.78696	3.43391	15	3.90933	4.5361	4.04104	4.45096	3.76622	3.25705	3.64642	3.31798	2.50783
all_loops_480	chr1	46450000	46460000	chr1	53790000	53800000	26	2.10807	0.790021	0.639114	1.24756	11.8203	29.3251	35.3126	19.3683	168.993	24	2.04201	0.822028	1.19017	1.35245	11.2511	26.138	18.6797	16.5927	125.99
all_loops_481	chr1	46470000	46480000	chr1	53770000	53780000	25	1.56039	1.18261	0.218504	2.23834	15.117	19.5694	78.806	10.7341	105.231	17	1.79282	1.44582	0.679333	2.00643	9.03415	11.0621	21.9418	8.11802	56.5651
all_loops_482	chr1	46580000	46590000	chr1	53680000	53690000	16	0.222421	0.204227	0.373882	0.12237	49.9346	52.921	33.9747	72.402	193.801	9	0.397911	0.293388	0.542894	0.410737	18.2764	23.1323	14.1547	17.8174	83.0556
all_loops_483	chr1	46660000	46670000	chr1	53620000	53630000	23	0.570942	0.319611	2.02395	0.0523094	34.4292	55.051	10.876	151.665	180.644	23	0.672253	0.415202	0.740342	0.437389	29.9125	44.8368	27.4888	42.9856	140.856
all_loops_484	chr1	46900000	46910000	chr1	47020000	47030000	85	26.8017	26.3174	37.0502	25.7311	3.16337	3.22137	2.2907	3.29447	3.58466	78	27.7904	26.5839	32.8796	29.7396	2.80024	2.92686	2.36813	2.61733	3.48744
all_loops_485	chr1	51010000	51020000	chr1	51380000	51390000	147	37.6855	33.8405	41.5138	40.9036	3.89303	4.33405	3.53489	3.58749	11.896	125	36.2533	32.7852	42.3122	38.5129	3.44123	3.80415	2.94962	3.23985	10.3808
all_loops_486	chr1	51010000	51020000	chr1	51650000	51660000	38	9.1037	8.98085	9.77856	11.1225	4.13964	4.19564	3.85684	3.39495	6.90507	38	10.6329	9.61947	12.2202	11.2409	3.54984	3.91997	3.09248	3.35953	6.94613
all_loops_487	chr1	51520000	51530000	chr1	51650000	51660000	204	58.0822	52.2245	72.4197	58.752	3.50794	3.90066	2.81441	3.46802	5.79013	184	52.2767	48.5079	63.0323	55.9162	3.51492	3.78745	2.9161	3.28655	5.56504
all_loops_488	chr1	51720000	51730000	chr1	52000000	52010000	105	28.6314	32.5454	43.1226	36.4668	3.65802	3.21944	2.4316	2.87419	8.49417	50	20.9641	21.8548	25.9338	25.1136	2.37846	2.28196	1.92442	1.98702	4.78033
all_loops_489	chr1	52050000	52060000	chr1	52150000	52160000	102	56.321	46.3034	48.0028	51.8415	1.80961	2.20027	2.12254	1.96567	2.67979	65	36.7903	33.8624	30.6371	40.0585	1.76469	1.91683	2.11796	1.62107	1.95588
all_loops_490	chr1	52200000	52210000	chr1	52320000	52330000	89	37.011	32.178	33.5395	39.5808	2.40091	2.76039	2.64867	2.24542	3.04318	65	32.9561	29.2633	33.7672	29.6755	1.96938	2.21705	1.92221	2.18636	2.4196
all_loops_491	chr1	52350000	52360000	chr1	52800000	52810000	47	15.9787	15.0822	20.1639	16.0678	2.92935	3.10231	2.32433	2.91319	5.65751	33	14.3642	15.3453	16.7636	16.7528	2.28841	2.14304	1.96281	1.96406	4.05635
all_loops_492	chr1	52360000	52370000	chr1	52680000	52690000	74	25.9709	24.1858	25.5576	33.7667	2.84225	3.05117	2.88803	2.18799	6.06947	53	22.6602	20.5682	20.2393	28.408	2.33302	2.56917	2.61071	1.86264	4.51644
all_loops_493	chr1	52550000	52560000	chr1	52680000	52690000	114	51.7151	43.1946	46.6302	58.1675	2.20206	2.63543	2.44168	1.95821	3.67654	88	43.942	39.8576	41.511	53.8096	2.00036	2.20483	2.11723	1.63422	3.1112
all_loops_494	chr1	52700000	52710000	chr1	52800000	52810000	116	39.2386	34.873	43.4568	36.4769	2.9513	3.31971	2.66548	3.17414	4.04865	100	32.6255	29.615	37.4176	31.3306	3.05878	3.36867	2.66808	3.18479	3.87518
all_loops_495	chr1	52700000	52710000	chr1	52910000	52920000	63	20.7877	17.6672	29.2014	19.3448	3.02091	3.55149	2.15348	3.24508	4.48349	42	19.7488	16.8576	25.8305	18.1233	2.12104	2.48267	1.62357	2.31022	3.05043
all_loops_496	chr1	52700000	52710000	chr1	53010000	53020000	34	10.9724	8.64023	12.0215	10.7742	3.07972	3.9015	2.81317	3.13586	3.32012	14	9.73036	8.56756	10.2065	8.39077	1.43433	1.62676	1.36807	1.66063	1.44939
all_loops_497	chr1	53110000	53120000	chr1	53320000	53330000	90	24.3222	23.6673	31.2259	25.8651	3.68926	3.79093	2.87621	3.47005	5.37627	36	18.1278	18.977	27.2261	19.6585	1.98049	1.89233	1.32108	1.82706	2.20636
all_loops_498	chr1	53110000	53120000	chr1	53410000	53420000	99	21.3328	23.8908	31.513	26.6311	4.62376	4.13074	3.13479	3.70729	6.92982	89	21.627	25.9838	33.2055	25.717	4.10088	3.41591	2.67523	3.45122	6.00803
all_loops_499	chr1	53360000	53370000	chr1	60100000	60110000	18	0.0823	0.169848	0.49798	0.209643	99.2869	67.0747	30.2685	58.4544	90.6055	10	0.134615	0.238926	0.533376	0.353129	43.0492	29.8	15.9463	22.2895	39.6052
all_loops_500	chr1	53770000	53780000	chr1	53940000	53950000	129	35.7734	32.2154	41.1799	41.5508	3.59877	3.995	3.12743	3.09958	6.7683	93	32.7485	32.5266	43.3674	36.6259	2.83422	2.8535	2.14184	2.53499	5.04325
all_loops_501	chr1	53960000	53970000	chr1	54430000	54440000	61	18.7824	14.4803	19.9561	15.6031	3.23582	4.19057	3.04645	3.89094	7.8201	42	14.6786	12.1269	15.3722	13.271	2.84872	3.44323	2.72101	3.14861	5.48402
all_loops_502	chr1	53960000	53970000	chr1	54570000	54580000	34	10.2777	9.30443	11.7927	9.8162	3.2859	3.62595	2.8673	3.43882	5.36955	17	8.56199	8.50503	10.0457	9.57314	1.97414	1.98721	1.68544	1.76778	2.62887
all_loops_503	chr1	54490000	54500000	chr1	54560000	54570000	126	57.4423	62.9367	66.1899	65.954	2.19143	2.00042	1.90225	1.90904	2.3828	68	54.6818	53.8223	60.0921	54.4084	1.24311	1.26293	1.13138	1.24935	1.3825
all_loops_504	chr1	54720000	54730000	chr1	54880000	54890000	95	42.4929	42.5999	49.6641	42.0031	2.23277	2.22717	1.91102	2.25874	2.98699	101	43.0572	41.7686	47.2563	42.5689	2.3426	2.4147	2.13488	2.36941	3.25979
all_loops_505	chr1	54720000	54730000	chr1	54980000	54990000	95	32.4871	42.033	55.9618	41.9686	2.91833	2.25714	1.69634	2.26059	5.48259	95	30.6263	38.6904	55.6535	36.6004	3.09507	2.45164	1.70572	2.59125	5.36368
all_loops_506	chr1	54720000	54730000	chr1	55030000	55040000	133	52.7688	41.7236	56.2734	49.5756	2.51755	3.18241	2.36104	2.67938	7.93159	146	50.9943	41.956	60.6836	49.4346	2.85942	3.47394	2.40361	2.94945	8.15247
all_loops_507	chr1	54880000	54890000	chr1	55030000	55040000	94	43.4456	41.0525	54.2772	44.5525	2.16096	2.28662	1.7305	2.10739	3.52119	97	43.4603	40.7068	53.3543	43.9998	2.22909	2.37951	1.8165	2.20182	3.64573
all_loops_508	chr1	54890000	54900000	chr1	54970000	54980000	128	58.8415	61.1739	73.079	71.6496	2.17334	2.09061	1.7505	1.78537	3.54326	107	49.6481	49.8114	60.6786	53.6764	2.15284	2.1458	1.76213	1.99158	3.17424
all_loops_509	chr1	55290000	55300000	chr1	55430000	55440000	126	35.0443	29.8917	28.2657	42.3951	3.58807	4.20449	4.44551	2.9674	5.29629	79	27.8454	25.7047	24.3237	33.9268	2.83052	3.06533	3.23866	2.32464	3.41312
all_loops_510	chr1	55450000	55460000	chr1	55930000	55940000	54	21.3035	14.8027	19.9658	16.7326	2.52762	3.6302	2.69613	3.21401	9.06167	40	18.8129	13.3436	14.9636	15.1326	2.12024	2.98283	2.66204	2.63252	6.19045
all_loops_511	chr1	55460000	55470000	chr1	55790000	55800000	65	17.2547	13.7126	15.6083	18.951	3.75116	4.71307	4.1443	3.41714	10.743	25	11.1365	8.68175	10.167	10.2496	2.23379	2.8582	2.44472	2.42521	4.42247
all_loops_512	chr1	55940000	55950000	chr1	57040000	57050000	84	12.9307	17.8654	21.1784	19.5923	6.45399	4.68122	3.95236	4.2707	30.3938	45	12.5849	14.2569	17.7745	15.1827	3.55541	3.14135	2.52315	2.95106	15.1619
all_loops_513	chr1	55940000	55950000	chr1	57260000	57270000	80	19.5147	15.0828	15.846	18.1079	4.08367	5.27572	5.02319	4.3992	48.4796	40	14.5847	11.7454	11.808	12.6085	2.73072	3.38528	3.36749	3.15538	23.2831
all_loops_514	chr1	56020000	56030000	chr1	57040000	57050000	43	12.1896	18.5845	20.2563	21.5382	3.50704	2.30672	2.11728	1.99185	15.3396	30	11.2853	15.5548	13.9229	18.6721	2.64375	1.92273	2.14649	1.60345	9.92481
all_loops_515	chr1	57480000	57490000	chr1	58000000	58010000	75	17.137	16.0081	26.5795	15.9871	4.3569	4.66224	2.8149	4.66835	15.1457	61	12.9007	14.6723	24.1977	14.4205	4.69977	4.13611	2.51464	4.20785	11.7896
all_loops_516	chr1	57480000	57490000	chr1	58090000	58100000	52	12.023	13.3043	21.2659	12.8819	4.29762	3.8868	2.43846	4.01328	12.5974	61	13.6972	15.0498	24.0424	14.2786	4.42843	4.03305	2.53082	4.24938	13.3942
all_loops_517	chr1	57480000	57490000	chr1	58320000	58330000	30	7.70428	6.68602	10.0502	7.16952	3.85686	4.43559	2.96547	4.14058	12.1303	29	8.91606	7.61328	10.6495	7.43125	3.22757	3.77272	2.7071	3.8639	10.4599
all_loops_518	chr1	58210000	58220000	chr1	58320000	58330000	91	25.5544	27.162	32.1414	32.5156	3.55105	3.34165	2.82556	2.79315	4.4997	35	22.3904	22.9255	24.1677	26.5876	1.56067	1.52439	1.44636	1.31522	1.83079
all_loops_519	chr1	58210000	58220000	chr1	58350000	58360000	66	29.3387	27.5569	38.1712	25.2345	2.24534	2.39	1.72715	2.60909	3.48708	27	22.1385	20.4858	24.8777	19.4871	1.21861	1.31644	1.08497	1.38356	1.54909
all_loops_520	chr1	58610000	58620000	chr1	58730000	58740000	120	53.7254	51.2981	47.8979	70.1424	2.23129	2.33666	2.50219	1.70979	4.72885	100	53.3951	53.3124	49.4477	72.1847	1.8712	1.8741	2.02027	1.3848	3.80705
all_loops_521	chr1	58620000	58630000	chr1	58750000	58760000	95	52.8572	44.9107	47.4972	54.2051	1.79579	2.11283	1.99802	1.75122	4.22957	56	53.0057	49.0471	50.9281	51.0992	1.05638	1.14147	1.09939	1.09572	2.47463
all_loops_522	chr1	58750000	58760000	chr1	58950000	58960000	34	12.0884	11.1732	8.94155	14.546	2.79773	3.02486	3.77148	2.32829	3.70761	47	13.3441	12.3058	12.3798	14.9061	3.50341	3.79661	3.7741	3.13873	4.63647
all_loops_523	chr1	58820000	58830000	chr1	59050000	59060000	88	32.7025	28.388	37.9309	31.0976	2.68577	3.09254	2.31654	2.82393	6.07027	96	33.6394	26.4424	33.4766	30.3469	2.8483	3.62062	2.86211	3.15632	6.63387
all_loops_524	chr1	58830000	58840000	chr1	58940000	58950000	94	38.9093	38.6056	47.2483	44.1653	2.41225	2.43117	1.9874	2.12582	4.5597	81	39.4155	38.5176	46.8593	43.7826	2.05236	2.10008	1.72703	1.84811	4.04934
all_loops_525	chr1	59060000	59070000	chr1	59190000	59200000	113	40.2823	41.2648	53.005	44.8721	2.80073	2.73421	2.12974	2.51489	4.34993	53	33.3109	34.2532	40.8623	35.143	1.5893	1.54571	1.29631	1.50668	2.27918
all_loops_526	chr1	59060000	59070000	chr1	59290000	59300000	73	27.3122	26.9348	33.4414	32.5184	2.6667	2.70393	2.1794	2.24107	4.74426	76	27.6486	28.3349	31.7784	32.6399	2.74248	2.67629	2.3872	2.32438	5.34516
all_loops_527	chr1	59120000	59130000	chr1	59200000	59210000	152	72.2238	73.2625	81.6442	73.7814	2.10304	2.07327	1.86068	2.0587	3.45221	106	43.2997	51.7333	59.7399	52.0092	2.44472	2.04695	1.77307	2.03611	2.92956
all_loops_528	chr1	59120000	59130000	chr1	59290000	59300000	111	34.0637	38.1032	39.8724	46.8601	3.25199	2.90813	2.77942	2.36584	5.47759	71	33.6924	35.8829	38.8257	36.897	2.10403	1.97594	1.82656	1.92178	4.00447
all_loops_529	chr1	59200000	59210000	chr1	59290000	59300000	131	59.3468	52.7561	49.1487	64.7466	2.20533	2.48032	2.662	2.02169	3.90993	56	45.7182	43.444	37.9241	54.5217	1.2244	1.28835	1.47538	1.02707	1.93763
all_loops_530	chr1	59300000	59310000	chr1	59670000	59680000	103	42.7707	29.4125	28.8509	42.1066	2.4049	3.49343	3.5612	2.44275	12.351	76	34.0638	26.4169	23.111	39.8757	2.2275	2.86987	3.27862	1.90366	9.31013
all_loops_531	chr1	59370000	59380000	chr1	59640000	59650000	117	33.2381	43.8911	55.5615	45.4361	3.5125	2.6619	2.10379	2.57158	10.9352	73	28.2732	36.5321	51.5008	38.4137	2.57637	1.99552	1.41664	1.89803	7.4915
all_loops_532	chr1	59370000	59380000	chr1	59670000	59680000	120	44.9307	45.5715	61.0156	61.9097	2.66707	2.62965	1.96513	1.93679	10.2038	133	42.2793	36.353	45.3491	50.9774	3.14068	3.65128	2.92855	2.60585	12.4893
all_loops_533	chr1	59940000	59950000	chr1	60020000	60030000	117	56.7615	60.6477	75.4486	61.935	2.05939	1.92764	1.54999	1.88764	3.46741	94	59.1264	61.437	68.3978	65.0684	1.58882	1.52916	1.37377	1.44395	2.73791
all_loops_534	chr1	60580000	60590000	chr1	60910000	60920000	101	47.6604	36.2002	37.2331	57.1258	2.11682	2.78511	2.70805	1.76669	9.01684	88	44.1132	32.7616	30.8852	50.8706	1.99262	2.68094	2.84329	1.72845	7.91831
all_loops_535	chr1	60620000	60630000	chr1	60910000	60920000	111	46.0088	43.6046	41.6457	66.5438	2.40952	2.54207	2.66135	1.66707	7.82691	81	40.8372	38.1077	38.0816	61.6886	1.98108	2.12261	2.12406	1.31254	5.9316
all_loops_536	chr1	61430000	61440000	chr1	61810000	61820000	111	30.5036	25.2038	34.7946	30.0012	3.63029	4.39065	3.18387	3.69088	9.00907	121	29.0026	25.5001	34.8369	29.4449	4.16113	4.73045	3.46625	4.09885	10.0912
all_loops_537	chr1	61430000	61440000	chr1	61970000	61980000	50	15.0728	16.3439	23.2969	14.6055	3.30197	3.04672	2.14131	3.40689	5.6266	37	15.8877	17.3705	24.4688	17.0066	2.32053	2.12358	1.51005	2.16875	4.29899
all_loops_538	chr1	61430000	61440000	chr1	62060000	62070000	50	14.2817	15.5659	24.0017	12.5444	3.4836	3.19803	2.07869	3.96222	6.90573	32	14.0256	14.8878	19.3201	14.1169	2.27248	2.14174	1.65293	2.25788	4.65961
all_loops_539	chr1	61430000	61440000	chr1	62740000	62750000	48	12.8676	14.8927	18.7551	14.1735	3.70924	3.20823	2.55103	3.36988	21.4672	44	12.4421	12.6991	16.9879	12.376	3.51615	3.44556	2.58078	3.53479	19.0692
all_loops_540	chr1	61810000	61820000	chr1	62740000	62750000	47	14.5645	15.419	15.8461	23.5398	3.21184	3.03499	2.9537	1.9924	10.9859	26	12.1812	13.06	13.9496	17.4342	2.1252	1.98329	1.8577	1.48852	6.10075
all_loops_541	chr1	61970000	61980000	chr1	62740000	62750000	80	19.6754	19.7309	21.6912	30.1776	4.05049	4.03915	3.6758	2.64552	13.9051	49	17.3838	17.0431	17.9507	21.9119	2.80832	2.86412	2.72012	2.23062	9.01826
all_loops_542	chr1	62060000	62070000	chr1	62740000	62750000	64	18.7399	20.1299	18.2062	33.4267	3.40236	3.16857	3.50155	1.91191	9.73052	30	16.1645	15.3014	13.4716	20.6717	1.85066	1.95437	2.21786	1.44909	5.04164
all_loops_543	chr1	6260000	6270000	chr1	6320000	6330000	93	43.054	39.592	40.0423	43.1601	2.15739	2.34556	2.31925	2.1521	2.3484	77	41.2716	38.6073	39.9382	41.5965	1.8636	1.99187	1.92566	1.84907	2.02623
all_loops_544	chr1	62840000	62850000	chr1	63000000	63010000	54	23.1033	22.1606	27.9831	23.8115	2.33156	2.43031	1.92643	2.26251	3.73154	36	18.4251	18.8352	21.4891	19.5823	1.94871	1.9065	1.67214	1.83414	2.62516
all_loops_545	chr1	63360000	63370000	chr1	89960000	89970000	15	0.132343	0.140699	1.00441	0.227034	64.9902	62.7339	13.6724	46.1726	176.973	1	0.283632	0.176754	0.923486	0.240255	2.86733	3.97465	1.07476	3.23287	9.81219
all_loops_546	chr1	63450000	63460000	chr1	63700000	63710000	61	32.0106	25.2943	34.8056	22.0373	1.9028	2.40605	1.75043	2.76005	3.90083	39	23.3	21.0771	25.2987	16.4707	1.67094	1.84633	1.53945	2.35959	2.54066
all_loops_547	chr1	63700000	63710000	chr1	64750000	64760000	60	16.1274	11.3237	14.2638	13.0531	3.7036	5.26099	4.18412	4.56928	17.8934	63	17.87	13.4047	18.0177	14.9616	3.5114	4.67244	3.48277	4.18946	17.1962
all_loops_548	chr1	63710000	63720000	chr1	64490000	64500000	129	25.6935	30.7412	34.1618	32.2243	5.00514	4.18596	3.76805	3.9939	24.8638	153	34.3783	35.8642	41.4808	35.776	4.44047	4.25701	3.68199	4.26748	28.6872
all_loops_549	chr1	63800000	63810000	chr1	64490000	64500000	177	36.8915	40.7488	47.1051	49.4211	4.78759	4.3355	3.75171	3.57625	25.5276	166	33.5316	39.6964	40.2914	51.2563	4.93881	4.17374	4.11227	3.23427	22.4345
all_loops_550	chr1	63810000	63820000	chr1	64160000	64170000	68	19.651	21.018	30.1275	19.1929	3.44793	3.22473	2.25292	3.5298	7.60416	64	20.934	23.1502	32.142	21.7434	3.04745	2.75696	1.98809	2.93453	7.57299
all_loops_551	chr1	6390000	6400000	chr1	6850000	6860000	34	10.4995	9.76753	10.034	10.611	3.21713	3.45578	3.36491	3.18366	7.56513	18	15.6753	12.219	11.4343	14.1468	1.14737	1.46927	1.56924	1.27046	3.67657
all_loops_552	chr1	64040000	64050000	chr1	64490000	64500000	74	25.1904	23.4145	19.4506	37.5415	2.92996	3.15125	3.79016	1.96857	8.11594	38	18.5531	17.7348	12.9182	34.2201	2.04256	2.13627	2.92668	1.11014	4.37301
all_loops_553	chr1	64160000	64170000	chr1	64490000	64500000	109	52.9544	39.5231	35.5376	53.7296	2.05638	2.75345	3.06138	2.02677	7.02996	105	52.3997	34.9298	27.6337	49.7399	2.00191	3.0003	3.78962	2.10875	7.30079
all_loops_554	chr1	64660000	64670000	chr1	64750000	64760000	208	58.6251	47.1922	54.9074	49.7532	3.54363	4.4003	3.78313	4.17425	5.69566	179	51.4798	43.9163	51.1921	51.3851	3.47229	4.06895	3.49176	3.47868	5.0921
all_loops_555	chr1	64660000	64670000	chr1	64960000	64970000	46	13.3911	17.4812	21.4363	19.3068	3.41707	2.62212	2.14057	2.37545	4.00298	34	16.5452	19.0328	22.695	19.5003	2.04864	1.78228	1.49594	1.73977	2.99542
all_loops_556	chr1	64770000	64780000	chr1	64960000	64970000	173	55.8425	49.2958	75.7227	55.0585	3.09425	3.50435	2.28296	3.13823	7.92049	166	53.8304	48.9558	68.8024	56.8751	3.07989	3.38594	2.41065	2.91531	7.9394
all_loops_557	chr1	64770000	64780000	chr1	65030000	65040000	127	38.4269	39.7053	64.7103	38.9724	3.29899	3.19304	1.96111	3.25294	7.16619	68	40.5228	39.3173	55.8069	37.0282	1.6764	1.72767	1.2181	1.83419	3.82776
all_loops_558	chr1	64780000	64790000	chr1	64850000	64860000	99	47.7013	41.4459	53.0172	37.4007	2.07316	2.38531	1.86569	2.64262	3.66019	80	38.6205	36.5572	46.5957	34.6456	2.06867	2.18511	1.71536	2.30533	3.29182
all_loops_559	chr1	65090000	65100000	chr1	65220000	65230000	168	52.6205	38.5924	45.5317	49.1174	3.18851	4.34453	3.68384	3.41546	5.10261	106	42.765	33.2141	36.5251	38.5528	2.47521	3.18484	2.89692	2.74495	3.30706
all_loops_560	chr1	65160000	65170000	chr1	65220000	65230000	257	112.906	102.785	117.62	113.262	2.27511	2.49891	2.18399	2.26796	3.07551	216	87.1546	81.2411	99.8788	80.7347	2.47666	2.65671	2.16146	2.67336	2.80679
all_loops_561	chr1	65350000	65360000	chr1	66150000	66160000	42	23.1254	14.9312	19.3581	15.1232	1.81267	2.80084	2.16362	2.76552	12.2711	21	15.134	10.0684	14.4521	8.32636	1.38506	2.07506	1.44996	2.50405	5.95904
all_loops_562	chr1	66150000	66160000	chr1	66360000	66370000	47	22.2846	18.9027	22.9412	18.4096	2.10413	2.47859	2.04416	2.54463	3.26583	21	19.6366	19.2575	23.7972	19.3694	1.06908	1.09002	0.88295	1.08375	1.45559
all_loops_563	chr1	66150000	66160000	chr1	66700000	66710000	131	23.7372	20.3176	26.4246	26.9192	5.49981	6.42094	4.94258	4.8521	24.3987	82	20.0905	19.1294	26.4876	21.5083	4.06628	4.2695	3.08791	3.79947	14.8257
all_loops_564	chr1	66940000	66950000	chr1	66990000	67000000	68	32.1805	32.762	33.074	32.4341	2.10964	2.0723	2.05281	2.09319	2.48552	40	25.6307	24.4235	27.7794	25.5364	1.55845	1.63517	1.43834	1.56418	1.57374
all_loops_565	chr1	66940000	66950000	chr1	67030000	67040000	72	24.9948	24.5088	36.0775	31.1803	2.87311	2.92985	1.99295	2.30496	3.37027	31	16.7822	17.6048	24.7208	17.6389	1.84217	1.75659	1.25298	1.75321	1.6217
all_loops_566	chr1	67680000	67690000	chr1	69170000	69180000	30	10.3412	8.55034	8.84695	11.6412	2.88282	3.47963	3.36427	2.56362	22.3129	29	9.45242	9.02533	10.6135	11.0218	3.04635	3.18893	2.7162	2.61649	19.548
all_loops_567	chr1	69290000	69300000	chr1	69730000	69740000	84	25.1858	30.4421	37.4625	30.2121	3.32598	2.75357	2.23894	2.77447	9.97074	67	22.9323	26.6277	33.2496	26.4516	2.9133	2.51051	2.01202	2.52716	7.69251
all_loops_568	chr1	69370000	69380000	chr1	69730000	69740000	156	38.8528	41.5303	52.8531	49.0458	4.00741	3.74967	2.94789	3.17626	11.6424	136	38.0838	40.1912	49.1853	48.1641	3.56434	3.37791	2.76147	2.8199	9.81133
all_loops_569	chr1	69830000	69840000	chr1	70310000	70320000	50	18.2608	15.5789	24.223	14.3321	2.72864	3.19538	2.05978	3.47143	5.09664	24	12.8905	12.1711	16.3327	10.9503	1.8552	1.96397	1.46659	2.18094	2.57911
all_loops_570	chr1	69830000	69840000	chr1	70870000	70880000	31	10.8588	9.12354	10.4197	8.71604	2.8379	3.37181	2.95636	3.52766	9.89382	13	8.0661	7.72069	9.44301	8.92028	1.60419	1.67504	1.37273	1.45228	4.02408
all_loops_571	chr1	69830000	69840000	chr1	71570000	71580000	37	9.78198	9.37001	15.3229	10.6224	3.75431	3.91763	2.40552	3.46005	20.0576	26	11.569	9.23615	15.2041	10.535	2.23669	2.79558	1.70543	2.45416	12.8845
all_loops_572	chr1	69830000	69840000	chr1	72180000	72190000	28	5.62012	5.12802	6.28004	5.99624	4.91249	5.37488	4.40436	4.6094	25.7675	18	5.01657	4.63757	7.40001	4.3389	3.53752	3.82053	2.41333	4.07758	15.153
all_loops_573	chr1	71320000	71330000	chr1	72180000	72190000	31	10.3847	10.6042	12.7807	15.4437	2.96623	2.90539	2.41446	2.00081	7.6355	11	7.96015	7.66326	8.68869	9.99728	1.37715	1.42981	1.26299	1.09931	2.57857
all_loops_574	chr1	71330000	71340000	chr1	71550000	71560000	120	31.373	29.8689	38.2816	34.101	3.81597	4.00749	3.1291	3.51159	7.51567	78	25.0052	22.9647	26.7848	29.3871	3.1109	3.38612	2.90498	2.64862	5.1749
all_loops_575	chr1	71690000	71700000	chr1	72160000	72170000	97	40.3361	37.3076	37.9935	54.2357	2.40132	2.59573	2.54899	1.78704	11.6287	85	33.4697	32.7162	35.6552	42.8169	2.53502	2.59323	2.38007	1.9829	9.82017
all_loops_576	chr1	72360000	72370000	chr1	72640000	72650000	61	29.9773	24.2334	29.1027	28.6609	2.03143	2.51095	2.09227	2.12441	6.58271	51	28.2265	23.7029	26.1522	28.1217	1.80397	2.14679	1.9465	1.81066	5.26905
all_loops_577	chr1	72360000	72370000	chr1	72750000	72760000	37	12.9282	10.0036	10.8274	10.8707	2.84767	3.67196	3.39515	3.38172	5.72326	29	14.0215	12.5595	13.9743	16.6594	2.06069	2.29866	2.0676	1.73634	4.18617
all_loops_578	chr1	72760000	72770000	chr1	72900000	72910000	148	38.5973	29.1033	31.516	34.7243	3.82714	5.07135	4.68434	4.25278	6.87964	73	26.1955	21.498	18.3275	21.4319	2.77994	3.38457	3.96689	3.39496	3.76079
all_loops_579	chr1	72760000	72770000	chr1	73860000	73870000	54	19.0816	19.6196	23.1152	21.6797	2.82042	2.74346	2.33037	2.48397	16.6161	33	15.1842	15.1045	16.7933	16.8365	2.16564	2.17699	1.95935	1.95436	9.29767
all_loops_580	chr1	72920000	72930000	chr1	73670000	73680000	55	21.7524	16.5331	27.896	13.7763	2.52146	3.31266	1.96814	3.97081	12.7836	39	18.5875	14.5806	23.8112	12.0753	2.09231	2.66339	1.63522	3.21141	8.63186
all_loops_581	chr1	72920000	72930000	chr1	73780000	73790000	81	17.2026	22.6811	36.9719	19.861	4.68716	3.55996	2.18764	4.06293	19.7464	41	12.4939	19.2059	29.6072	19.0226	3.26348	2.12889	1.3835	2.14929	9.44494
all_loops_582	chr1	72920000	72930000	chr1	73860000	73870000	94	25.7131	28.4757	36.3975	28.0511	3.64543	3.29301	2.57826	3.34268	26.5154	95	24.3306	23.9815	28.4032	25.7113	3.89266	3.94908	3.33647	3.68443	25.0058
all_loops_583	chr1	7390000	7400000	chr1	9520000	9530000	25	6.94449	4.75802	6.57022	7.03536	3.56307	5.16671	3.76299	3.51769	29.4239	15	4.51724	3.74513	4.62538	3.93478	3.27035	3.92705	3.19551	3.74246	14.6783
all_loops_584	chr1	74250000	74260000	chr1	74400000	74410000	61	20.1707	21.3002	28.0603	24.4903	3.0142	2.85512	2.16972	2.48472	3.72017	76	25	27.1	33.6513	32.8456	3.03187	2.79779	2.25473	2.30987	4.64845
all_loops_585	chr1	74260000	74270000	chr1	74310000	74320000	139	68.7249	72.6991	71.1512	79.9655	2.02107	1.91074	1.95225	1.73733	3.01581	142	75.4131	78.0012	75.0577	90.9123	1.88179	1.81943	1.89069	1.56133	3.18445
all_loops_586	chr1	74350000	74360000	chr1	74400000	74410000	257	118.334	123.125	131.503	122.741	2.17082	2.08642	1.95361	2.09295	4.40234	228	111.769	118.47	119.567	120.154	2.03899	1.92376	1.90613	1.89682	4.13039
all_loops_587	chr1	74350000	74360000	chr1	74490000	74500000	74	36.1468	37.5872	47.9752	42.4867	2.04432	1.96619	1.54133	1.73998	2.79249	86	37.446	39.2123	47.6053	48.4742	2.29319	2.19016	1.80483	1.77255	3.44377
all_loops_588	chr1	74500000	74510000	chr1	74800000	74810000	34	14.5136	10.7994	10.209	10.6392	2.33345	3.12862	3.30779	3.1753	3.65378	16	18.1403	13.3027	13.9592	13.1194	0.882659	1.20125	1.14516	1.2179	1.65427
all_loops_589	chr1	74690000	74700000	chr1	74800000	74810000	99	46.6565	45.3456	50.1511	58.2468	2.11949	2.18063	1.9721	1.69846	3.59832	128	46.5976	45.3352	53.1539	56.1774	2.74318	2.8194	2.40546	2.27622	4.74266
all_loops_590	chr1	74990000	75000000	chr1	75060000	75070000	186	73.3432	83.0774	99.2941	90.903	2.53393	2.23739	1.87234	2.04499	4.82774	184	57.4488	67.6256	83.2168	77.2352	3.19903	2.71832	2.20964	2.38055	5.13913
all_loops_591	chr1	74990000	75000000	chr1	75090000	75100000	223	103.611	92.5154	123.864	93.5162	2.15116	2.40889	1.79971	2.38313	5.36579	210	90.6544	85.0932	120.881	78.8267	2.31504	2.46616	1.73664	2.66196	5.32485
all_loops_592	chr1	75120000	75130000	chr1	75250000	75260000	74	33.564	32.7706	41.9549	37.2943	2.20116	2.25429	1.76198	1.98158	4.14452	60	30.4269	29.9382	41.4324	31.2827	1.96876	2.00078	1.44706	1.91507	3.59915
all_loops_593	chr1	75330000	75340000	chr1	75460000	75470000	142	56.0647	40.3177	56.6494	43.9464	2.53006	3.51579	2.50399	3.22615	5.34482	129	40.4322	32.1564	50.2409	34.2011	3.18512	4.00231	2.56452	3.76373	5.4613
all_loops_594	chr1	75340000	75350000	chr1	75430000	75440000	127	49.2292	50.2841	75.0381	45.7512	2.57657	2.52262	1.69155	2.77201	4.09511	70	34.6793	39.5633	65.153	35.2171	2.01557	1.76738	1.07428	1.98488	2.49285
all_loops_595	chr1	75490000	75500000	chr1	75550000	75560000	193	64.1225	64.1975	70.2558	76.3134	3.00673	3.00323	2.74462	2.52704	4.34032	81	42.6911	44.2183	45.7274	51.6609	1.89525	1.82994	1.76968	1.56682	2.24365
all_loops_596	chr1	75640000	75650000	chr1	77890000	77900000	35	9.19263	10.3914	13.4937	10.0703	3.77719	3.34558	2.58208	3.45124	32.3655	28	7.24232	9.28104	12.5276	10.7565	3.82713	2.9954	2.22529	2.58831	21.8898
all_loops_597	chr1	75650000	75660000	chr1	77510000	77520000	40	6.21576	9.09585	10.4573	9.88704	6.3492	4.36066	3.79832	4.0152	34.4279	32	3.86077	7.12626	8.60979	8.17045	8.10449	4.44213	3.68551	3.88129	24.2319
all_loops_598	chr1	77510000	77520000	chr1	77890000	77900000	97	32.082	24.1694	22.4067	33.7591	3.01722	4.00092	4.31428	2.86777	8.07418	93	36.1092	26.5799	29.7949	33.4223	2.57117	3.48952	3.11424	2.77726	7.5183
all_loops_599	chr1	77730000	77740000	chr1	118980000	118990000	25	0.029614	0.022419	0.0362544	0.331601	193.652	205.034	184.214	58.1555	336.888	20	0.0415743	0.0352398	0.0365934	0.471409	141.975	148.625	147.152	35.1762	213.33
all_loops_600	chr1	77970000	77980000	chr1	78410000	78420000	88	17.2328	18.6178	30.356	21.5919	5.08285	4.70674	2.89269	4.06143	15.0632	60	16.2421	17.1366	26.7456	20.3044	3.67762	3.48677	2.23873	2.94545	10.0426
all_loops_601	chr1	78210000	78220000	chr1	78410000	78420000	70	23.5179	22.866	25.2307	30.0478	2.96809	3.05234	2.76739	2.32521	5.85109	34	19.6233	18.3691	20.2571	21.5828	1.72892	1.84633	1.67509	1.57268	3.07945
all_loops_602	chr1	78530000	78540000	chr1	78650000	78660000	80	28.9343	29.5912	42.4131	34.3986	2.7588	2.69777	1.88413	2.32183	3.78965	65	26.2239	29.4532	40.7941	30.8203	2.47304	2.20281	1.59192	2.10541	3.03443
all_loops_603	chr1	78720000	78730000	chr1	79670000	79680000	60	19.4955	18.2227	28.0447	18.7379	3.06703	3.28009	2.13539	3.19038	20.3624	51	15.7057	15.3957	22.8843	17.3043	3.23302	3.29768	2.22326	2.93605	16.051
all_loops_604	chr1	79770000	79780000	chr1	80170000	80180000	55	24.0537	16.8477	21.4989	16.3029	2.28123	3.25118	2.55106	3.35916	6.73977	27	26.9254	18.4772	18.0745	22.3028	1.00276	1.45878	1.4911	1.20967	3.0152
all_loops_605	chr1	79780000	79790000	chr1	80100000	80110000	103	21.8036	20.0121	26.203	24.7264	4.70698	5.12628	3.9197	4.15284	11.563	52	18.2694	17.4834	19.2798	21.3866	2.83624	2.96302	2.68836	2.42477	5.90627
all_loops_606	chr1	80170000	80180000	chr1	80400000	80410000	66	28.0021	23.7203	33.9837	23.9787	2.35214	2.77494	1.93934	2.74516	3.92406	70	29.77	25.2754	35.594	25.9237	2.34683	2.76252	1.96392	2.6937	4.24332
all_loops_607	chr1	80170000	80180000	chr1	80510000	80520000	150	39.3582	34.5276	39.0168	50.061	3.80403	4.3347	3.83723	2.99236	9.24254	169	44.6808	36.4657	43.772	46.0995	3.77617	4.62455	3.8544	3.66022	9.93227
all_loops_608	chr1	80270000	80280000	chr1	80400000	80410000	94	36.2839	46.6701	47.6376	57.2326	2.58631	2.01197	1.97119	1.6413	2.93902	55	31.9676	45.227	48.8859	53	1.71824	1.21561	1.12481	1.03767	1.86598
all_loops_609	chr1	80330000	80340000	chr1	80500000	80510000	92	36.5917	39.2268	39.6613	60.5391	2.51011	2.34192	2.31633	1.51882	3.67856	89	37.1809	38.4403	39.6833	56.4367	2.38996	2.31186	2.23963	1.57597	3.795
all_loops_610	chr1	80400000	80410000	chr1	80500000	80510000	89	34.072	30.8971	29.5259	46.5496	2.60739	2.87446	3.0075	1.90998	3.36809	72	29.7681	30.2305	31.5213	46.3287	2.41395	2.37714	2.28011	1.55292	2.99517
all_loops_611	chr1	80450000	80460000	chr1	80500000	80510000	147	72.2863	59.1349	67.1574	71.2611	2.03215	2.48333	2.18712	2.06135	2.61422	113	62.3826	55.6806	58.0297	65.9743	1.8101	2.02759	1.94565	1.71171	2.10427
all_loops_612	chr1	80820000	80830000	chr1	81280000	81290000	84	19.6973	13.8748	13.0922	22.6273	4.24805	6.01796	6.37497	3.7004	14.4191	43	11.7969	9.08493	8.71683	12.753	3.62278	4.69247	4.88838	3.35332	7.59316
all_loops_613	chr1	81310000	81320000	chr1	82290000	82300000	87	14.8716	13.2533	22.4385	15.218	5.81767	6.52275	3.8645	5.68611	30.9746	93	15.909	12.9335	22.7865	16.1252	5.81547	7.14312	4.06791	5.73798	31.1592
all_loops_614	chr1	81310000	81320000	chr1	82430000	82440000	77	16.9553	15.8489	20.797	15.464	4.52059	4.8342	3.68953	4.95375	30.5054	50	12.742	13.9024	18.9828	14.7015	3.90127	3.57795	2.6254	3.3848	19.4487
all_loops_615	chr1	81510000	81520000	chr1	82290000	82300000	54	16.4923	16.0757	18.1651	23.9082	3.26055	3.34452	2.96193	2.25339	14.136	44	19.9734	15.8611	17.8925	21.1189	2.19694	2.76297	2.45103	2.07834	11.0471
all_loops_616	chr1	82550000	82560000	chr1	82630000	82640000	81	34.7647	34.1367	34.6763	36.6084	2.32613	2.3688	2.33205	2.20931	3.11871	58	26.7704	26.7777	30.1144	27.8155	2.16223	2.16164	1.92293	2.08128	2.38847
all_loops_617	chr1	83020000	83030000	chr1	85100000	85110000	23	1.51637	1.86935	4.44244	2.0306	14.2912	11.7297	5.08537	10.842	8.02443	32	3.90366	4.63952	8.33999	3.21407	8.01767	6.77284	3.80332	9.68597	8.69883
all_loops_618	chr1	83020000	83030000	chr1	85240000	85250000	26	5.27744	3.94935	8.06578	3.30836	4.85361	6.44549	3.19627	7.65764	5.11142	18	7.1262	5.91638	7.79036	3.99412	2.50478	3.00845	2.29394	4.42098	2.73612
all_loops_619	chr1	83020000	83030000	chr1	87500000	87510000	38	2.34762	1.47039	3.53518	1.61179	15.5661	24.2616	10.4809	22.2574	27.8462	33	2.49622	1.75319	5.14061	1.26828	12.7493	17.861	6.31606	24.1909	18.0978
all_loops_620	chr1	83060000	83070000	chr1	83140000	83150000	151	66.9574	64.6616	85.867	66.6311	2.25329	2.33317	1.75765	2.26431	3.17794	121	61.74	64.1818	87.294	61.2821	1.95828	1.88389	1.38568	1.97289	2.6578
all_loops_621	chr1	83060000	83070000	chr1	83170000	83180000	149	57.4131	50.3343	73.337	51.7623	2.59245	2.95632	2.03031	2.87492	3.50811	106	52.7296	49.3233	68.1843	54.5478	2.00834	2.14676	1.5538	1.94153	2.59509
all_loops_622	chr1	83060000	83070000	chr1	83710000	83720000	69	9.51018	11.0373	12.9347	19.2534	7.19029	6.20435	5.30122	3.57044	9.35597	86	12.6813	13.5645	15.6792	21.5729	6.73638	6.301	5.45657	3.9727	11.1031
all_loops_623	chr1	83170000	83180000	chr1	83710000	83720000	95	30.8966	20.6823	15.6887	42.4701	3.06807	4.57601	6.02329	2.23396	11.3907	73	32.5307	20.0652	16.6783	34.4532	2.24022	3.62505	4.35683	2.11558	8.37827
all_loops_624	chr1	83210000	83220000	chr1	83710000	83720000	91	23.8858	19.6285	18.2857	36.6409	3.79807	4.61769	4.95494	2.47953	12.1531	60	26.8682	20.3415	19.9191	32.371	2.22855	2.9401	3.00213	1.85088	7.60497
all_loops_625	chr1	83730000	83740000	chr1	84570000	84580000	26	4.21626	4.57348	5.72637	4.61826	6.0469	5.58471	4.47963	5.5317	17.698	12	5.32404	4.79214	6.39383	4.19842	2.23081	2.47335	1.86331	2.81499	7.38809
all_loops_626	chr1	83740000	83750000	chr1	84090000	84100000	53	20.4162	18.6559	26.6251	16.931	2.5882	2.83111	1.9869	3.11785	6.49518	31	18.1834	16.041	21.8487	15.5228	1.701	1.92677	1.41694	1.99068	4.05034
all_loops_627	chr1	83740000	83750000	chr1	84280000	84290000	58	13.2472	12.1592	15.5594	14.3513	4.35297	4.7393	3.71023	4.02041	14.3884	83	13.5739	11.9707	15.9844	12.6471	6.07728	6.88446	5.16649	6.51911	20.0807
all_loops_628	chr1	84960000	84970000	chr1	87440000	87450000	26	4.00948	4.69901	5.02433	4.25286	6.35117	5.43862	5.09335	5.99606	49.504	25	3.50593	4.84417	5.19059	3.96273	6.96076	5.07669	4.74427	6.17812	34.248
all_loops_629	chr1	84980000	84990000	chr1	85110000	85120000	47	10.2386	13.6608	13.4441	12.9914	4.55572	3.42276	3.47753	3.59778	1.65221	36	11.9072	14.4205	13.5553	16.9987	3.00652	2.48613	2.64367	2.11127	1.16145
all_loops_630	chr1	84980000	84990000	chr1	87480000	87490000	133	65.224	45.7855	47.4102	32.6985	2.03754	2.9007	2.80151	4.05811	32.0681	125	64.0075	42.2482	50.9392	32.1947	1.95141	2.95408	2.45106	3.8737	21.7706
all_loops_631	chr1	84990000	85000000	chr1	85280000	85290000	55	18.2424	22.1115	28.8071	18.3561	3.00397	2.4807	1.90611	2.98546	2.70865	40	18.8386	22.11	29.6298	19.1298	2.11737	1.80549	1.34882	2.08531	1.69574
all_loops_632	chr1	85020000	85030000	chr1	87440000	87450000	28	6.29172	5.64215	3.36449	4.77696	4.39631	4.89363	8.11086	5.76179	72.6095	20	6.0713	5.5113	2.595	4.59147	3.25701	3.58206	7.45825	4.28437	39.2264
all_loops_633	chr1	85080000	85090000	chr1	85160000	85170000	207	82.4123	117.044	110.467	113.179	2.50993	1.76791	1.87308	1.82823	0.817977	188	87.1698	130.028	108.76	100.944	2.15538	1.4455	1.72791	1.86156	0.663524
all_loops_634	chr1	85080000	85090000	chr1	87390000	87400000	215	105.301	78.7789	85.0168	56.5991	2.04077	2.72696	2.52712	3.79371	39.5645	237	122.113	82.9757	88.2369	55.8917	1.94006	2.85402	2.68404	4.23456	31.5509
all_loops_635	chr1	85080000	85090000	chr1	87510000	87520000	386	126.192	100.556	103.333	100.825	3.0572	3.83584	3.73286	3.8256	49.9275	381	136.692	102.82	105.452	96.5049	2.78597	3.70288	3.61055	3.94493	34.0491
all_loops_636	chr1	85110000	85120000	chr1	87470000	87480000	36	10.2902	14.7711	14.205	11.7841	3.47441	2.42752	2.5236	3.03767	40.8551	43	11.1587	15.515	16.1852	12.3148	3.82817	2.76016	2.64658	3.47166	35.3054
all_loops_637	chr1	85160000	85170000	chr1	87390000	87400000	84	30.5727	37.7334	34.5788	30.1104	2.74185	2.2229	2.42511	2.78381	29.4158	68	31.4271	36.6003	27.529	32.7457	2.16004	1.85557	2.4648	2.07333	17.5135
all_loops_638	chr1	85160000	85170000	chr1	87510000	87520000	142	38.8003	43.1071	38.269	46.8137	3.65293	3.28881	3.70351	3.02896	36.04	155	47.0844	46.49	34.5529	51.1032	3.2871	3.32904	4.47581	3.02911	26.7071
all_loops_639	chr1	85190000	85200000	chr1	87420000	87430000	30	8.96348	9.8296	7.39834	5.20136	3.32102	3.03134	4.01422	5.67779	44.9351	35	8.15099	9.82128	9.05171	4.47324	4.25404	3.53785	3.83535	7.67508	38.0822
all_loops_640	chr1	85190000	85200000	chr1	87540000	87550000	33	9.31577	6.50649	6.64556	5.21665	3.51538	5.01022	4.90693	6.22572	45.9645	32	9.70031	6.60268	6.74541	4.78523	3.27541	4.78913	4.68927	6.57083	33.0892
all_loops_641	chr1	85240000	85250000	chr1	87480000	87490000	476	199.864	207.18	211.413	264.021	2.38093	2.29689	2.25092	1.80258	32.3596	453	225.433	220.177	228.918	281.075	2.00902	2.05695	1.97844	1.61145	22.1322
all_loops_642	chr1	85270000	85280000	chr1	87480000	87490000	898	273.985	281.197	258.729	332.163	3.27672	3.19271	3.46986	2.70298	45.2749	952	284.151	303.218	297.424	356.449	3.3495	3.13895	3.20008	2.67032	33.8043
all_loops_643	chr1	87470000	87480000	chr1	87630000	87640000	60	8.17782	11.2914	14.9814	12.7641	7.26037	5.27591	3.98503	4.6719	3.56313	32	8.71113	10.8214	11.7261	12.1412	3.64312	2.93917	2.71433	2.62229	1.80357
all_loops_644	chr1	87750000	87760000	chr1	87820000	87830000	92	47.9092	45.1166	58.6755	43.2659	1.91838	2.03686	1.56698	2.12379	2.18011	80	41.6774	40.5011	49.367	42.8863	1.9173	1.97285	1.61926	1.86339	2.09998
all_loops_645	chr1	87750000	87760000	chr1	87900000	87910000	117	31.4183	31.1943	38.693	40.8361	3.7153	3.74189	3.01859	2.86056	5.06157	87	28.7387	26.8715	30.5904	33.1942	3.02025	3.22933	2.83802	2.61607	4.20597
all_loops_646	chr1	87820000	87830000	chr1	87900000	87910000	189	69.8735	68.9116	79.781	85.3857	2.70245	2.74012	2.36727	2.21207	4.36003	166	54.2021	55.577	58.4811	60.9709	3.05881	2.98328	2.83538	2.71979	4.59859
all_loops_647	chr1	88110000	88120000	chr1	88230000	88240000	222	67.6255	63.1469	76.6757	88.8878	3.27941	3.51163	2.89284	2.49585	7.09058	198	58.4936	54.8654	59.2326	83.9717	3.38092	3.60409	3.33881	2.35632	6.94429
all_loops_648	chr1	88330000	88340000	chr1	88390000	88400000	238	111.283	101.949	146.799	104.198	2.13767	2.33319	1.62085	2.28288	4.02549	184	89.5673	84.0429	125.219	74.4342	2.05314	2.18794	1.46905	2.47001	3.68155
all_loops_649	chr1	88510000	88520000	chr1	89080000	89090000	91	41.46	26.8534	27.5281	37.8849	2.19201	3.37991	3.29737	2.39832	13.5996	68	49.2406	30.6907	30.7628	47.0545	1.3802	2.21171	2.20654	1.44419	9.68666
all_loops_650	chr1	88540000	88550000	chr1	89080000	89090000	55	23.2642	21.1243	24.8229	29.9851	2.35831	2.59608	2.21082	1.83147	10.6157	55	26.037	23.8475	24.4727	35.6316	2.10812	2.30087	2.24233	1.54205	10.072
all_loops_651	chr1	88560000	88570000	chr1	88930000	88940000	149	34.8454	42.7137	49.1721	57.0838	4.26666	3.48253	3.02605	2.60738	15.5713	108	29.9889	35.941	40.4075	48.052	3.59268	2.99936	2.66864	2.24497	12.6587
all_loops_652	chr1	88660000	88670000	chr1	88900000	88910000	123	39.3367	41.0798	42.9406	41.9082	3.12146	2.98933	2.86009	2.93038	6.61147	91	40.2512	40.2195	40.7198	44.7013	2.25768	2.25945	2.23176	2.03343	5.13757
all_loops_653	chr1	89140000	89150000	chr1	89240000	89250000	116	58.691	56.7658	75.926	53.061	1.97479	2.04165	1.52711	2.18393	3.43946	104	58.2039	57.1591	77.8286	49.727	1.78547	1.81805	1.33584	2.08923	3.27585
all_loops_654	chr1	89340000	89350000	chr1	89500000	89510000	105	45.9388	41.6607	42.1612	51.3652	2.28286	2.51672	2.48691	2.04216	4.58362	99	46.6578	41.1983	48.6603	45.9837	2.11943	2.39962	2.03239	2.15044	4.58864
all_loops_655	chr1	89340000	89350000	chr1	89650000	89660000	111	50.7076	38.144	39.4857	45.0969	2.18668	2.90503	2.80657	2.45813	7.61555	162	55.362	46.6916	46.1224	56.9983	2.92272	3.4643	3.50696	2.83897	11.6714
all_loops_656	chr1	89430000	89440000	chr1	89500000	89510000	150	61.0244	69.7688	78.5853	77.6884	2.45565	2.14831	1.9076	1.92959	3.38064	107	67.0855	73.1315	75.3757	79.7134	1.59409	1.46249	1.419	1.34188	2.55752
all_loops_657	chr1	89660000	89670000	chr1	89810000	89820000	90	46.3585	42.9698	47.4057	51.0606	1.93937	2.09195	1.89661	1.76112	3.92221	72	46.3172	44.1252	50.4178	52.7391	1.5533	1.63029	1.42722	1.36452	3.30328
all_loops_658	chr1	90010000	90020000	chr1	90180000	90190000	78	33.7138	29.5019	22.4199	47.493	2.30971	2.63834	3.46804	1.641	4.53537	41	24.2979	25.0646	21.4729	34.9525	1.68457	1.63325	1.90517	1.17253	2.70267
all_loops_659	chr1	90040000	90050000	chr1	90180000	90190000	149	41.2527	38.1476	39.5569	51.215	3.60557	3.89828	3.75975	2.90558	6.20808	73	30.2185	32.6162	34.8855	40.8749	2.41107	2.23436	2.08944	1.78402	3.44778
all_loops_660	chr1	90250000	90260000	chr1	90310000	90320000	159	68.7879	62.3868	80.6201	62.4232	2.30955	2.54614	1.97101	2.54465	3.38647	147	66.8007	59.6637	68.9231	59.993	2.19878	2.46136	2.13117	2.44787	3.47611
all_loops_661	chr1	90250000	90260000	chr1	90450000	90460000	72	23.6866	25.503	30.1473	28.5555	3.03112	2.81607	2.38369	2.51609	3.85725	52	23.6394	26.2874	34.3203	26.6725	2.19466	1.97443	1.51364	1.94603	3.08244
all_loops_662	chr1	90250000	90260000	chr1	90600000	90610000	120	23.8724	29.0211	35.8141	42.4806	5.00993	4.12415	3.34409	2.82053	11.7667	152	28.2993	31.9332	39.5492	44.1061	5.35577	4.74819	3.83615	3.44071	15.2615
all_loops_663	chr1	90250000	90260000	chr1	90630000	90640000	90	40.956	27.0878	33.1108	35.8702	2.19456	3.31398	2.71298	2.50485	9.60339	75	43.3299	29.3999	38.9503	37.0832	1.72922	2.54577	1.92316	2.01973	8.29931
all_loops_664	chr1	90320000	90330000	chr1	90600000	90610000	204	49.952	45.803	49.2202	74.3714	4.07776	4.44633	4.13827	2.74065	13.9061	209	59.9849	50.8422	58.4017	79.2236	3.48007	4.10465	3.57425	2.63604	14.3199
all_loops_665	chr1	90320000	90330000	chr1	90630000	90640000	129	65.6454	43.7575	62.0711	45.2127	1.96364	2.94363	2.07653	2.84909	9.69642	92	66.9621	46.033	62.5098	44.7624	1.37335	1.9964	1.47102	2.05295	7.04447
all_loops_666	chr1	90340000	90350000	chr1	90450000	90460000	133	71.1254	65.1291	63.2184	80.805	1.86872	2.0405	2.10207	1.64514	3.59242	89	65.3197	62.2349	66.7866	68.1411	1.36197	1.42937	1.3321	1.30567	2.86186
all_loops_667	chr1	90370000	90380000	chr1	90450000	90460000	240	119.137	109.511	111.673	131.435	2.01363	2.19047	2.1481	1.82537	4.07291	173	102.425	105.656	114.077	108.888	1.68836	1.63678	1.51607	1.58824	3.40713
all_loops_668	chr1	90450000	90460000	chr1	90590000	90600000	185	64.8474	53.018	57.6351	71.1734	2.85	3.48469	3.20602	2.59704	6.61682	117	58.3698	51.2213	55.2343	74.3589	2.00274	2.2817	2.11623	1.57268	4.81202
all_loops_669	chr1	90530000	90540000	chr1	90590000	90600000	119	63.8357	58.1552	53.97	74.9201	1.86281	2.04445	2.2027	1.58758	3.08443	120	61.7621	56.9652	56.9845	70.8701	1.94142	2.10461	2.1039	1.69226	3.47082
all_loops_670	chr1	90650000	90660000	chr1	90960000	90970000	108	43.0286	39.537	62.226	36.8009	2.50646	2.72725	1.73443	2.92947	7.14735	116	42.6524	38.5233	57.0875	36.2014	2.71564	3.00596	2.03016	3.19822	8.59348
all_loops_671	chr1	90650000	90660000	chr1	91080000	91090000	126	31.19	31.6901	43.9846	42.0518	4.03004	3.96665	2.86041	2.99157	15.2036	111	33.1373	34.1842	46.3476	42.5952	3.34263	3.24056	2.39194	2.60216	14.1225
all_loops_672	chr1	90850000	90860000	chr1	90960000	90970000	112	52.4881	55.8136	64.4264	60.9979	2.13166	2.00488	1.73727	1.83476	3.24843	77	44.8827	48.7283	51.5813	55.456	1.71399	1.579	1.49184	1.38779	2.59035
all_loops_673	chr1	90960000	90970000	chr1	91080000	91090000	120	56.3833	47.9726	47.9014	64.7414	2.12629	2.4983	2.50201	1.85221	3.18184	130	65.117	56.8739	62.0419	72.3046	1.99488	2.2835	2.0936	1.79685	3.78521
all_loops_674	chr1	91130000	91140000	chr1	91350000	91360000	104	44.4909	40.7204	57.4237	35.7808	2.33456	2.55019	1.80969	2.90127	4.95891	91	53.7908	47.687	68.2334	40.9078	1.69046	1.90638	1.33317	2.22153	4.72343
all_loops_675	chr1	91130000	91140000	chr1	91420000	91430000	120	29.9014	26.3329	39.4991	26.9799	4.00314	4.54358	3.0329	4.43502	9.59831	119	31.9675	26.1112	43.7923	27.3035	3.71404	4.54385	2.71346	4.34616	10.4669
all_loops_676	chr1	91130000	91140000	chr1	91490000	91500000	76	25.6717	26.2787	46.8443	24.167	2.95285	2.8849	1.62107	3.13595	6.59764	72	25.9172	26.451	48.356	26.3638	2.77124	2.71552	1.48795	2.72447	6.54589
all_loops_677	chr1	91130000	91140000	chr1	91520000	91530000	65	22.0387	15.8416	25.4721	17.2998	2.94055	4.08365	2.54574	3.74143	8.1111	53	22.3941	16.1431	26.2524	19.4527	2.36062	3.26908	2.015	2.71574	6.97483
all_loops_678	chr1	91220000	91230000	chr1	91420000	91430000	96	42.1806	39.1457	45.7763	45.1538	2.27291	2.44868	2.09476	2.12358	4.66474	73	37.7391	36.1938	38.5694	41.9396	1.93186	2.01412	1.89038	1.73884	3.93908
all_loops_679	chr1	91350000	91360000	chr1	91410000	91420000	141	77.9934	68.9578	72.7235	75.2784	1.80681	2.04322	1.93756	1.87189	2.71019	166	84.8584	72.8975	85.2138	81.1311	1.95507	2.27542	1.94693	2.04478	3.62846
all_loops_680	chr1	91540000	91550000	chr1	91840000	91850000	62	15.5618	10.2039	11.4908	15.2798	3.96506	6.02682	5.35769	4.03776	8.36134	27	15.7441	9.02596	10.0405	14.0811	1.71042	2.96955	2.67245	1.911	3.74819
all_loops_681	chr1	91950000	91960000	chr1	92480000	92490000	126	17.8178	15.3803	19.2775	19.5461	7.03771	8.14582	6.50756	6.41858	31.3992	100	21.9228	17.9618	19.9827	18.7492	4.5453	5.5421	4.98439	5.31056	23.0521
all_loops_682	chr1	92100000	92110000	chr1	92480000	92490000	89	19.1898	19.5339	21.2283	26.3289	4.61903	4.53807	4.17755	3.37131	10.4056	99	21.046	24.1098	26.3853	39.6222	4.68647	4.09338	3.7417	2.49483	10.2743
all_loops_683	chr1	92540000	92550000	chr1	92730000	92740000	80	19.8335	20.6316	25.1356	23.1174	4.01837	3.86367	3.17409	3.44999	6.62638	60	21.4918	21.416	25.7908	23.0668	2.78346	2.79327	2.32129	2.59423	5.11899
all_loops_684	chr1	92540000	92550000	chr1	92850000	92860000	74	13.0207	11.3727	17.0042	14.2189	5.64758	6.45879	4.33228	5.17498	6.88236	51	14.9283	13.5969	20.039	15.715	3.40025	3.73077	2.53737	3.2311	5.04712
all_loops_685	chr1	92800000	92810000	chr1	92850000	92860000	177	74.3123	53.5537	59.7879	75.3108	2.37998	3.3008	2.95719	2.34847	3.35789	152	67.9303	49.8559	60.9972	64.3939	2.23577	3.04469	2.48948	2.35836	3.31845
all_loops_686	chr1	92870000	92880000	chr1	93000000	93010000	98	50.0159	42.6789	56.9326	49.2448	1.95746	2.29319	1.72007	1.98805	3.55486	128	63.358	51.8389	68.8245	60.4102	2.01866	2.46636	1.85856	2.117	4.77089
all_loops_687	chr1	93320000	93330000	chr1	93380000	93390000	271	108.144	99.088	132.384	132.383	2.50452	2.73319	2.04628	2.0463	4.58012	268	104.948	97.8107	123.769	122.437	2.55217	2.73821	2.16438	2.18792	5.07565
all_loops_688	chr1	93470000	93480000	chr1	93640000	93650000	90	41.1243	40.1955	47.0189	46.6773	2.18561	2.23598	1.91218	1.92615	4.37734	111	50.3708	49.9687	58.6756	54.677	2.20127	2.21895	1.89024	2.02822	5.08779
all_loops_689	chr1	93470000	93480000	chr1	93770000	93780000	78	25.1251	29.7678	37.4631	32.3863	3.09612	2.61486	2.07917	2.40409	5.68344	65	26.0421	35.3351	45.8635	36.9654	2.49023	1.83716	1.41634	1.75635	4.69487
all_loops_690	chr1	93710000	93720000	chr1	93770000	93780000	192	93.9416	87.4799	87.473	92.3	2.04271	2.19342	2.1936	2.079	3.03806	214	124.28	107.645	116.713	110.618	1.72134	1.98711	1.83284	1.93374	3.62072
all_loops_691	chr1	94410000	94420000	chr1	94500000	94510000	143	37.1952	36.6024	44.4271	39.1799	3.83695	3.89893	3.21377	3.64309	5.17182	63	30.7541	30.8124	33.91	32.0162	2.04511	2.04125	1.85534	1.96474	2.39452
all_loops_692	chr1	94850000	94860000	chr1	94900000	94910000	103	52.0551	48.2657	56.7282	46.7247	1.9768	2.13167	1.81424	2.20183	2.42488	62	48.0342	44.7719	50.1077	45.315	1.29014	1.38394	1.23686	1.36739	1.45367
all_loops_693	chr1	9550000	9560000	chr1	9670000	9680000	137	74.8185	66.0014	89.5918	85.9288	1.82999	2.07409	1.52857	1.59365	3.15689	94	59.806	57.2843	71.8356	70.9553	1.5708	1.63982	1.30811	1.32432	2.36217
all_loops_694	chr1	9610000	9620000	chr1	9680000	9690000	191	64.986	65.2969	68.3427	74.3274	2.93611	2.92216	2.79211	2.5676	5.38926	125	50.1827	49.8958	58.0184	53.5234	2.48793	2.50221	2.1525	2.33294	3.94236
all_loops_695	chr1	9760000	9770000	chr1	10000000	10010000	89	33.8382	29.819	41.138	28.5608	2.62536	2.97804	2.16063	3.10878	7.01336	75	31.4203	29.6982	42.3345	29.1482	2.38259	2.52029	1.76979	2.56768	6.21739
all_loops_696	chr1	98740000	98750000	chr1	98910000	98920000	63	15.5216	12.8942	14.2095	13.5239	4.03929	4.85603	4.40964	4.63156	4.03027	29	10.8168	10.2887	10.9605	10.4469	2.66561	2.80112	2.63097	2.75909	1.79212
all_loops_697	chr1	98930000	98940000	chr1	99580000	99590000	44	10.4418	8.36788	12.6772	11.8932	4.18333	5.20791	3.45145	3.67708	8.85367	20	7.21807	5.80418	8.50139	7.58191	2.74663	3.40437	2.33683	2.61654	3.65842
all_loops_698	chr1	98930000	98940000	chr1	99700000	99710000	31	6.55649	5.33401	8.95262	5.03809	4.67213	5.72321	3.43547	6.05283	7.04205	16	6.64733	5.20231	6.29467	6.90545	2.38613	3.03641	2.51772	2.29821	3.33928
all_loops_699	chr1	99700000	99710000	chr1	100240000	100250000	98	29.9535	31.6148	47.0147	37.1004	3.26418	3.09319	2.08215	2.63707	9.74023	127	30.4616	30.5756	43.3037	40.6805	4.15882	4.14336	2.92832	3.11668	12.149
all_loops_700	chr1	99700000	99710000	chr1	100290000	100300000	83	38.1534	24.2232	39.1422	23.4929	2.17235	3.41649	2.11762	3.52224	10.7955	64	36.4584	22.3336	36.8132	19.2017	1.75336	2.85732	1.73651	3.32094	7.9384
all_loops_701	chr1	99700000	99710000	chr1	100420000	100430000	40	12.2759	9.63939	11.7276	10.3729	3.24018	4.1173	3.39036	3.82894	5.98842	41	14.4066	10.9795	13.0846	12.7419	2.83319	3.70956	3.11728	3.20047	5.53069
all_loops_702	chr1	99870000	99880000	chr1	100240000	100250000	59	20.8176	23.4196	22.1732	30.3673	2.82537	2.5128	2.65341	1.93979	4.92411	67	25.7878	26.9099	26.5193	39.1453	2.59196	2.48428	2.52072	1.70976	5.32865
all_loops_703	chr10	100200000	100210000	chr10	101900000	101910000	34	9.19569	8.44562	11.4694	9.95819	3.66837	3.99035	2.94743	3.39027	34.3668	22	8.37892	6.94995	8.84907	7.29376	2.60646	3.13478	2.46953	2.98901	18.9277
all_loops_704	chr10	10120000	10130000	chr10	10270000	10280000	156	42.533	39.8969	40.0851	51.607	3.66148	3.9028	3.88452	3.01894	6.19761	122	39.4164	39.856	44.2146	47.9778	3.08986	3.05586	2.7553	2.53963	4.88797
all_loops_705	chr10	101910000	101920000	chr10	102280000	102290000	128	32.8427	23.7435	26.7634	43.3806	3.88857	5.37253	4.76856	2.94614	15.2313	121	33.2233	24.6485	28.8426	41.1871	3.63409	4.89323	4.18414	2.93312	13.7191
all_loops_706	chr10	101950000	101960000	chr10	102280000	102290000	144	26.903	31.6424	33.298	53.8638	5.33645	4.53967	4.31462	2.67031	13.6284	110	22.3836	29.162	32.6233	50.455	4.8969	3.76256	3.36457	2.17783	9.73841
all_loops_707	chr10	101960000	101970000	chr10	102090000	102100000	83	37.4816	36.6611	46.7059	34.265	2.21119	2.26054	1.77542	2.41816	2.84517	77	35.2525	35.1944	47.3032	32.7907	2.18089	2.18448	1.62647	2.34413	2.80391
all_loops_708	chr10	101960000	101970000	chr10	102190000	102200000	133	31.3928	32.0373	41.388	38.2265	4.22636	4.1416	3.20815	3.47279	8.75987	108	28.2272	29.552	37.3962	37.0607	3.81612	3.64563	2.88296	2.90899	7.44887
all_loops_709	chr10	102320000	102330000	chr10	102650000	102660000	44	12.8216	8.81156	12.4864	7.82631	3.41288	4.94863	3.50379	5.56375	6.68348	35	10.5739	7.57625	10.2337	8.48288	3.28839	4.57254	3.39667	4.08954	5.03023
all_loops_710	chr10	102710000	102720000	chr10	102860000	102870000	65	18.6508	15.7738	15.9228	17.2812	3.47185	4.10111	4.06295	3.74542	3.27056	23	14.3478	13.7655	13.4905	14.0634	1.59886	1.666	1.69972	1.63097	1.13652
all_loops_711	chr10	105300000	105310000	chr10	106020000	106030000	83	14.7745	10.9928	14.3602	15.9749	5.58676	7.49137	5.7468	5.16956	23.9431	45	12.083	8.78274	11.1775	12.1626	3.70189	5.07726	3.99912	3.67786	12.2149
all_loops_712	chr10	106050000	106060000	chr10	106290000	106300000	64	27.2448	27.5574	35.4722	26.8518	2.34414	2.31765	1.80197	2.37832	3.83486	54	30.2098	29.4755	37.4429	30.261	1.7849	1.82921	1.44102	1.78189	2.9567
all_loops_713	chr10	106870000	106880000	chr10	107140000	107150000	99	28.9271	27.759	43.3656	27.7199	3.41405	3.5572	2.27996	3.5622	7.89834	91	27.6436	25.6831	34.0646	30.3517	3.28364	3.53332	2.6665	2.99163	6.95024
all_loops_714	chr10	106870000	106880000	chr10	107180000	107190000	56	25.0955	16.8443	29.1256	15.7193	2.22659	3.31085	1.91955	3.5463	7.35234	37	22.5547	15.3246	26.6488	13.5427	1.63763	2.40526	1.38698	2.71941	5.13708
all_loops_715	chr10	107300000	107310000	chr10	107350000	107360000	78	42.061	38.4067	40.2654	43.6231	1.85242	2.02822	1.93483	1.78624	1.86117	71	35.4071	34.3826	34.0393	39.9243	2.00241	2.06191	2.08264	1.77642	1.80341
all_loops_716	chr10	107360000	107370000	chr10	107870000	107880000	34	11.1599	10.7484	12.1672	14.0702	3.02845	3.14333	2.77977	2.40647	3.55609	33	10.4063	10.7686	13.9933	13.7197	3.15048	3.04548	2.34863	2.39514	3.58842
all_loops_717	chr10	107370000	107380000	chr10	107600000	107610000	90	31.5933	29.8164	46.5774	28.3038	2.84287	3.01173	1.93027	3.17211	6.65057	61	26.0695	26.4649	40.2637	24.7445	2.33478	2.30003	1.51374	2.4593	5.17411
all_loops_718	chr10	107730000	107740000	chr10	107870000	107880000	127	59.725	43.3597	46.6419	57.3284	2.12453	2.92455	2.71919	2.21319	4.17189	162	62.5291	46.6515	49.45	59.8521	2.58825	3.46727	3.27145	2.70383	5.60259
all_loops_719	chr10	107730000	107740000	chr10	107960000	107970000	43	15.2624	15.935	21.0445	20.9038	2.80554	2.68786	2.03836	2.05201	2.91982	29	15.5549	16.4472	18.2077	20.9866	1.85885	1.75861	1.58949	1.38002	2.04712
all_loops_720	chr10	108170000	108180000	chr10	108930000	108940000	44	15.4596	14.8618	18.4896	15.4394	2.83426	2.9475	2.37229	2.83795	9.50015	21	12.9975	12.083	14.4685	13.5802	1.611	1.73192	1.44833	1.54238	4.33187
all_loops_721	chr10	10870000	10880000	chr10	10990000	11000000	54	23.7537	20.399	22.8323	23.934	2.26799	2.63915	2.35911	2.25098	2.6774	29	24.7998	22.042	26.8578	22.4585	1.16869	1.31424	1.07946	1.28998	1.48238
all_loops_722	chr10	10880000	10890000	chr10	10930000	10940000	98	44.0143	38.4756	49.6396	40.4776	2.22377	2.54306	1.97227	2.41759	2.38355	87	48.4884	44.4276	55.3017	45.5031	1.79261	1.95609	1.57215	1.90996	2.03597
all_loops_723	chr10	109210000	109220000	chr10	109290000	109300000	76	25.3033	27.1423	28.4992	31.2951	2.99567	2.79345	2.66091	2.42394	2.66801	45	27.9153	28.2966	32.3427	27.9447	1.60984	1.58822	1.39014	1.60815	1.41438
all_loops_724	chr10	109350000	109360000	chr10	109520000	109530000	51	11.2004	9.23372	11.4263	9.39017	4.52196	5.47477	4.43333	5.38452	5.9871	12	8.19243	7.08004	6.76763	7.15767	1.45916	1.68523	1.76189	1.6672	1.49122
all_loops_725	chr10	110230000	110240000	chr10	110410000	110420000	51	15.3302	14.6907	20.9041	15.1202	3.31168	3.45488	2.43286	3.35738	3.8625	56	13.9087	14.3218	17.0956	13.7094	4.00464	3.88995	3.26246	4.06246	4.23424
all_loops_726	chr10	110230000	110240000	chr10	110540000	110550000	38	9.60303	9.74054	12.3097	11.7178	3.92661	3.87174	3.07017	3.22396	5.0313	28	13.8148	10.9852	13.4751	11.0075	2.01944	2.5349	2.06997	2.52982	3.62132
all_loops_727	chr10	110420000	110430000	chr10	110530000	110540000	77	24.4972	22.0022	23.0512	27.7923	3.1345	3.48834	3.33028	2.7642	3.8894	49	20.9966	19.9211	19.951	26.6278	2.32739	2.45241	2.44876	1.83704	2.62973
all_loops_728	chr10	110730000	110740000	chr10	110920000	110930000	102	49.1648	32.8241	37.5717	42.8028	2.07247	3.10107	2.71026	2.3798	5.0487	88	43.1239	28.1569	30.112	34.197	2.03823	3.11782	2.91606	2.56874	4.75938
all_loops_729	chr10	110940000	110950000	chr10	111030000	111040000	160	67.0887	55.0023	70.7287	56.1799	2.38284	2.9055	2.26038	2.84471	3.65532	131	57.3371	48.8623	63.0813	48.2899	2.28249	2.67757	2.07498	2.70925	3.45809
all_loops_730	chr10	110940000	110950000	chr10	111080000	111090000	102	46.8656	38.0935	59.5998	38.2504	2.17393	2.67323	1.71022	2.6623	3.4806	69	43.3303	34.5451	50.6646	30.1904	1.59106	1.99451	1.36119	2.28125	2.63492
all_loops_731	chr10	110940000	110950000	chr10	111360000	111370000	109	22.524	27.1694	40.9501	34.3268	4.82231	4.00082	2.65773	3.16904	11.9071	106	21.7299	25.4204	36.8043	30.7862	4.86031	4.15746	2.875	3.43519	11.6381
all_loops_732	chr10	110940000	110950000	chr10	111390000	111400000	68	21.842	16.2177	25.4782	17.7575	3.10364	4.17337	2.66242	3.81352	12.454	34	17.0237	14.2724	22.984	16.8898	1.99139	2.3726	1.47721	2.00708	6.61767
all_loops_733	chr10	111090000	111100000	chr10	111360000	111370000	57	24.0991	21.9153	22.4967	29.879	2.35959	2.59365	2.52692	1.90466	5.83551	41	24.7641	22.1192	20.9139	29.0482	1.65299	1.84975	1.95585	1.41003	4.01282
all_loops_734	chr10	111410000	111420000	chr10	111540000	111550000	61	15.7959	12.7398	18.0912	15.1011	3.84375	4.75864	3.35876	4.01944	4.26663	47	14.8824	12.4787	14.065	14.2908	3.1437	3.74444	3.3251	3.27292	3.56063
all_loops_735	chr10	111410000	111420000	chr10	112230000	112240000	27	8.93407	5.46005	4.90261	8.21466	2.99975	4.87406	5.41717	3.2593	8.75308	38	7.0111	5.66449	4.54904	9.87092	5.35782	6.60943	8.19524	3.82111	11.5449
all_loops_736	chr10	111480000	111490000	chr10	111600000	111610000	29	8.8467	8.43998	7.47283	8.33455	3.2526	3.4075	3.84269	3.45009	3.43109	19	9.26361	8.79302	8.70322	8.23656	2.03981	2.14775	2.16966	2.29111	2.33709
all_loops_737	chr10	111640000	111650000	chr10	112230000	112240000	58	15.216	13.9057	16.0639	17.736	3.79341	4.1483	3.59443	3.25746	13.4835	23	10.4201	9.12005	10.5042	13.958	2.19579	2.50541	2.17838	1.6432	5.12425
all_loops_738	chr10	114760000	114770000	chr10	115050000	115060000	31	6.0942	5.65329	8.20303	8.86669	5.02083	5.40561	3.74562	3.46839	3.91889	37	9.71941	8.31439	9.77755	10.9915	3.77823	4.40911	3.75599	3.34491	4.36716
all_loops_739	chr10	115520000	115530000	chr10	115630000	115640000	146	44.6553	38.5924	46.48	39.4867	3.26442	3.77594	3.13654	3.69064	4.24987	104	40.5318	35.8835	43.1022	36.188	2.56203	2.89299	2.4096	2.86872	3.30053
all_loops_740	chr10	115520000	115530000	chr10	115750000	115760000	47	10.2884	11.6919	12.6021	14.3175	4.53389	3.99428	3.70805	3.26686	3.74211	37	9.04893	10.6945	12.601	11.7503	4.05512	3.43693	2.92102	3.13072	3.19603
all_loops_741	chr10	115640000	115650000	chr10	115750000	115760000	140	29.7949	23.2856	32.0191	31.1951	4.68641	5.99087	4.36189	4.47675	6.88831	132	26.2875	21.2923	27.6645	27.3571	5.00617	6.17511	4.75788	4.81114	7.2268
all_loops_742	chr10	115760000	115770000	chr10	116280000	116290000	53	19.5233	16.0906	22.0636	18.5669	2.70597	3.27967	2.39582	2.8446	11.0724	46	16.8474	14.3889	18.9117	16.6951	2.72018	3.18174	2.42482	2.74485	9.40183
all_loops_743	chr10	115760000	115770000	chr10	116470000	116480000	28	7.27144	5.33914	4.58341	5.78808	3.81201	5.16625	5.99991	4.77236	9.31833	25	7.24314	6.07383	7.24244	7.98009	3.41816	4.06555	3.41848	3.1064	7.88405
all_loops_744	chr10	116500000	116510000	chr10	116640000	116650000	98	39.1507	30.9716	33.3589	44.738	2.49932	3.15723	2.93195	2.18787	4.49959	69	32.4001	25.1127	25.91	35.8943	2.12615	2.74068	2.65667	1.91975	3.44007
all_loops_745	chr10	116580000	116590000	chr10	116640000	116650000	107	50.5098	45.6417	42.9804	53.0248	2.11619	2.34141	2.48605	2.01601	2.90122	63	39.2334	37.1347	32.0021	41.3499	1.60424	1.69466	1.9656	1.52232	1.89463
all_loops_746	chr10	116700000	116710000	chr10	116870000	116880000	71	20.1974	21.6734	24.4048	27.0687	3.50291	3.26546	2.90148	2.61698	4.31524	60	21.2947	20.9043	24.4608	21.4842	2.80911	2.86132	2.44699	2.78445	3.8365
all_loops_747	chr10	116770000	116780000	chr10	116870000	116880000	125	56.1106	43.8683	41.025	58.6779	2.22556	2.84523	3.04194	2.12835	4.19849	71	36.9814	34.0377	35.8668	35.0815	1.9174	2.08274	1.97682	2.02095	2.67535
all_loops_748	chr10	116890000	116900000	chr10	117110000	117120000	213	47.5657	36.3113	45.2183	48.4917	4.47072	5.85257	4.70229	4.38552	12.269	140	36.2121	28.4282	33.8735	37.052	3.85822	4.91093	4.1238	3.771	9.17825
all_loops_749	chr10	11720000	11730000	chr10	12320000	12330000	29	8.48564	7.57527	12.0281	7.56673	3.38938	3.7914	2.39938	3.79562	7.68112	19	6.25034	5.68751	8.08291	6.75372	3.00771	3.30021	2.33413	2.78681	5.00156
all_loops_750	chr10	117590000	117600000	chr10	118510000	118520000	22	3.63795	4.5057	4.74682	5.07181	5.91234	4.7984	4.55969	4.27317	15.3365	35	4.74833	5.64756	6.9246	5.71553	7.2396	6.10694	4.99673	6.03556	21.4489
all_loops_751	chr10	118020000	118030000	chr10	118510000	118520000	41	17.5638	15.9214	18.0915	19.3099	2.32679	2.56532	2.2593	2.11748	8.21552	56	15.6461	17.1999	19.2263	20.3462	3.56279	3.24278	2.90279	2.74378	10.7725
all_loops_752	chr10	119230000	119240000	chr10	119560000	119570000	38	12.6144	10.3002	14.9633	13.0718	2.99661	3.66339	2.52933	2.89254	5.33867	43	12.523	10.8115	13.2043	14.0284	3.41441	3.94997	3.23955	3.05059	6.16072
all_loops_753	chr10	119700000	119710000	chr10	120300000	120310000	47	16.6884	15.1629	14.5445	20.3784	2.8055	3.08592	3.21623	2.29999	12.0007	38	20.9308	19.8335	22.5245	26.8084	1.81163	1.91136	1.68401	1.41592	8.93783
all_loops_754	chr10	119740000	119750000	chr10	120140000	120150000	49	13.9701	16.9623	18.9971	18.2679	3.48968	2.87769	2.57107	2.67315	9.30417	22	13.1405	17.2767	17.6078	21.5408	1.66912	1.27182	1.24804	1.02122	4.41474
all_loops_755	chr10	120470000	120480000	chr10	120690000	120700000	48	14.857	14.835	13.4363	17.6699	3.2159	3.22063	3.55342	2.70682	5.65257	32	14.4167	13.7572	14.2268	16.9992	2.21124	2.31649	2.24056	1.87728	3.65049
all_loops_756	chr10	120840000	120850000	chr10	120950000	120960000	101	27.6668	27.3754	33.8696	31.4195	3.64104	3.67965	2.97619	3.20754	5.29289	81	24.4806	24.3683	29.8911	28.1974	3.29935	3.3145	2.70414	2.86599	4.5634
all_loops_757	chr10	121530000	121540000	chr10	121960000	121970000	61	17.1526	13.813	13.899	18.5961	3.5415	4.39157	4.3646	3.26807	11.9464	22	14.9093	11.7027	8.67011	13.2839	1.47242	1.87246	2.51992	1.65124	4.11124
all_loops_758	chr10	122230000	122240000	chr10	122440000	122450000	76	22.6772	17.9688	27.1292	15.5776	3.34106	4.21168	2.7948	4.85405	6.52456	96	26.9815	19.5728	29.6231	17.5826	3.54855	4.8849	3.23317	5.43471	7.9955
all_loops_759	chr10	12410000	12420000	chr10	12640000	12650000	72	33.2869	30.2267	37.495	28.9191	2.15953	2.37744	1.91781	2.48457	5.4402	75	31.3699	29.9912	36.6652	31.4157	2.38641	2.49575	2.04269	2.38294	5.67194
all_loops_760	chr10	12410000	12420000	chr10	12720000	12730000	47	22.2067	14.4025	16.496	20.043	2.11148	3.24771	2.83803	2.33828	5.69017	46	20.4821	14.6927	16.3573	21.0869	2.23981	3.11641	2.80118	2.17587	5.54106
all_loops_761	chr10	124700000	124710000	chr10	124930000	124940000	56	16.2165	17.3106	20.2798	19.7721	3.43823	3.22218	2.75273	2.82306	4.4083	37	15.5083	16.0214	15.0237	18.4136	2.37694	2.30128	2.4531	2.00393	3.00087
all_loops_762	chr10	12580000	12590000	chr10	12720000	12730000	51	21.3169	15.6452	15.2881	22.7963	2.38596	3.24543	3.32074	2.2318	3.17696	24	19.9138	14.4991	13.9235	21.1478	1.20417	1.65078	1.71854	1.13423	1.59416
all_loops_763	chr10	126350000	126360000	chr10	126460000	126470000	122	41.63	29.9522	60.869	26.7875	2.92596	4.06293	2.00266	4.54115	5.96491	120	38.0656	27.5138	56.0581	25.2025	3.14682	4.34927	2.1386	4.74656	6.24359
all_loops_764	chr10	126360000	126370000	chr10	126420000	126430000	186	54.5107	53.2686	77.4655	53.1706	3.40776	3.48707	2.39926	3.49349	5.38999	158	52.5701	52.3997	74.5212	51.0087	3.0017	3.01145	2.1187	3.09341	4.84339
all_loops_765	chr10	12640000	12650000	chr10	12710000	12720000	116	34.8595	29.6597	32.7184	37.9493	3.32099	3.90124	3.53765	3.0513	4.70993	67	30.8925	25.1934	25.1024	32.1076	2.16504	2.65287	2.66244	2.08336	2.9016
all_loops_766	chr10	126560000	126570000	chr10	126610000	126620000	151	72.9459	64.6245	74.3929	63.1759	2.06856	2.33451	2.02838	2.38795	3.48579	103	67.3983	64.8228	70.0441	56.2368	1.52745	1.58804	1.46983	1.83006	2.64432
all_loops_767	chr10	126560000	126570000	chr10	126660000	126670000	85	31.3592	32.6665	42.8998	37.6878	2.70509	2.59717	1.97908	2.25205	4.21522	87	35.4884	34.8432	42.7695	43.1783	2.44743	2.49262	2.03175	2.01256	4.71783
all_loops_768	chr10	126610000	126620000	chr10	126660000	126670000	132	45.8949	50.3798	53.5104	50.6748	2.87205	2.61689	2.46407	2.60168	4.39206	106	43.8604	49.84	50.9503	50.4316	2.41354	2.12455	2.07834	2.09968	3.78107
all_loops_769	chr10	126780000	126790000	chr10	126900000	126910000	81	43.6481	36.737	48.8345	41.0717	1.85379	2.20159	1.65732	1.9698	4.20865	66	42.6398	37.8262	43.0838	38.2727	1.54657	1.74286	1.53067	1.72258	3.47602
all_loops_770	chr10	127010000	127020000	chr10	127060000	127070000	172	62.9618	61.7511	68.7678	64.2711	2.72907	2.78249	2.49899	2.67356	4.7635	144	58.6053	54.5902	62.3087	60.4934	2.45463	2.63484	2.30897	2.37815	4.45737
all_loops_771	chr10	127110000	127120000	chr10	127370000	127380000	80	30.0099	34.892	41.2244	42.0192	2.66025	2.28909	1.93832	1.90175	5.9553	74	34.8028	40.1859	36.9501	51.0909	2.12304	1.83935	2	1.44752	6.03749
all_loops_772	chr10	127170000	127180000	chr10	127370000	127380000	161	52.3352	53.0183	56.1916	67.4029	3.07237	3.03285	2.86188	2.38657	10.0289	156	44.6188	50.8992	53.9875	63.4736	3.4907	3.06083	2.88607	2.45542	10.8186
all_loops_773	chr10	12730000	12740000	chr10	12800000	12810000	57	27.2372	22.1529	19.0006	22.97	2.08873	2.56596	2.98943	2.47507	2.26929	17	21.7009	17.1082	13.6009	15.413	0.784373	0.993714	1.2481	1.1023	0.834608
all_loops_774	chr10	12730000	12740000	chr10	13140000	13150000	81	21.6854	15.5648	18.0417	19.6147	3.72267	5.17721	4.47037	4.11367	13.438	56	18.7	14.1866	17.0795	16.2195	2.98405	3.92676	3.26552	3.4376	10.0358
all_loops_775	chr10	12730000	12740000	chr10	14040000	14050000	22	5.24955	4.67586	6.04778	4.9649	4.13119	4.62744	3.59479	4.36337	16.7257	18	7.73091	5.52552	6.2184	4.32834	2.31135	3.21748	2.86465	4.08731	13.0455
all_loops_776	chr10	127390000	127400000	chr10	127440000	127450000	308	87.1399	75.7473	93.3788	80.8277	3.53164	4.06211	3.29594	3.8071	5.7784	220	67.5938	60.2402	68.1573	66.0577	3.2514	3.64765	3.22456	3.3269	4.9993
all_loops_777	chr10	127520000	127530000	chr10	127620000	127630000	190	77.4664	64.9502	62.4584	84.2652	2.4508	2.92236	3.03876	2.2533	5.88119	136	69.7407	60.341	66.9132	83.1623	1.94872	2.25178	2.03094	1.63459	4.67869
all_loops_778	chr10	127570000	127580000	chr10	127620000	127630000	238	87.9675	88.6596	88.6796	95.6242	2.70361	2.68253	2.68192	2.48736	5.1144	224	79.0052	88.1297	85.5385	94.1899	2.83294	2.53996	2.61681	2.37671	5.20372
all_loops_779	chr10	127980000	127990000	chr10	128110000	128120000	73	36.8264	28.6175	28.8131	43.1168	1.97962	2.54549	2.52826	1.69147	3.81974	48	34.5767	28.4536	27.1511	38.6251	1.3871	1.68455	1.76507	1.24209	2.78843
all_loops_780	chr10	127990000	128000000	chr10	128040000	128050000	140	65.7403	58.4567	59.6486	68.514	2.12788	2.39255	2.34482	2.04186	3.87609	138	55.0166	54.6698	58.4409	58.6063	2.5056	2.52146	2.35904	2.35239	3.83103
all_loops_781	chr10	12800000	12810000	chr10	13140000	13150000	94	27.1577	27.7121	26.8503	32.2131	3.45223	3.38342	3.49162	2.91214	10.8588	52	21.391	22.3506	22.0303	26.4848	2.42427	2.32065	2.35424	1.95977	6.77778
all_loops_782	chr10	128060000	128070000	chr10	128110000	128120000	189	71.1591	66.4701	68.6191	73.0201	2.6537	2.84062	2.75178	2.58616	4.92716	138	57.5219	57.4111	59.6001	60.699	2.39666	2.40128	2.31323	2.27142	3.93354
all_loops_783	chr10	128360000	128370000	chr10	128410000	128420000	170	77.4974	66.4084	83.1931	69.2938	2.19208	2.55757	2.04219	2.45123	3.55428	160	65.0921	57.9973	70.6719	62.5518	2.45582	2.75572	2.2622	2.55539	3.57723
all_loops_784	chr10	128460000	128470000	chr10	129520000	129530000	64	12.5929	14.5023	18.2959	16.2129	5.05008	4.38972	3.48447	3.92941	24.322	41	13.8096	13.1554	15.8036	16.2663	2.9548	3.10063	2.58432	2.51126	13.7541
all_loops_785	chr10	128980000	128990000	chr10	129520000	129530000	87	25.2994	26.7887	32.0512	30.4848	3.42921	3.23927	2.70908	2.84782	14.5447	61	25.2436	26.3767	29.3857	28.5063	2.41087	2.30769	2.07219	2.13589	10.1182
all_loops_786	chr10	129660000	129670000	chr10	129730000	129740000	154	50.6903	49.2076	60.2518	52.1188	3.03404	3.12528	2.55336	2.95105	4.15166	144	43.6042	42.7007	47.3175	44.7033	3.29717	3.36676	3.03896	3.21628	4.40477
all_loops_787	chr10	13280000	13290000	chr10	13920000	13930000	50	14.6248	12.6123	13.3458	15.5105	3.40243	3.94107	3.72607	3.20938	14.5675	17	13.3537	12.849	13.8391	16.1365	1.27102	1.32056	1.22676	1.05318	4.99901
all_loops_788	chr10	13690000	13700000	chr10	13910000	13920000	52	17.6415	19.2895	19.1192	26.4781	2.93662	2.68703	2.71083	1.96026	4.08226	34	17.1399	19.8441	15.9003	25.6868	1.97797	1.70978	2.13121	1.32238	2.78882
all_loops_789	chr10	14160000	14170000	chr10	14420000	14430000	130	40.1781	32.4807	40.1969	44.7118	3.23004	3.99317	3.22854	2.90325	10.3406	110	37.0053	28.2823	37.5413	34.3116	2.96723	3.87918	2.92498	3.1995	9.09596
all_loops_790	chr10	14450000	14460000	chr10	14890000	14900000	62	25.546	19.43	26.0372	18.421	2.42143	3.17973	2.37592	3.35295	7.32816	53	22.6932	17.9928	20.0728	18.6762	2.32964	2.93487	2.63226	2.82805	6.64748
all_loops_791	chr10	14580000	14590000	chr10	14890000	14900000	124	37.6125	39.9409	43.1761	40.5464	3.29069	3.09933	2.86763	3.05316	8.56302	71	29.6174	32.9759	31.8401	34.5502	2.39254	2.1496	2.22604	2.05193	5.39019
all_loops_792	chr10	15020000	15030000	chr10	17440000	17450000	39	7.28962	8.50915	8.78254	8.71058	5.29121	4.54168	4.40189	4.43785	31.5875	44	7.79892	10.425	12.192	9.17488	5.58304	4.19003	3.58769	4.75478	32.9812
all_loops_793	chr10	16200000	16210000	chr10	17440000	17450000	36	9.45486	9.64059	9.331	15.0362	3.77818	3.70614	3.8278	2.385	11.9898	17	10.6895	9.40437	8.4408	14.7733	1.58487	1.79917	2.00216	1.14971	5.26457
all_loops_794	chr10	16360000	16370000	chr10	17440000	17450000	58	15.1643	13.0168	14.0247	19.4001	3.80626	4.42943	4.11335	2.97947	17.2111	48	17.0043	13.551	14.9083	19.755	2.81216	3.52356	3.20488	2.42256	13.9639
all_loops_795	chr10	17450000	17460000	chr10	17580000	17590000	144	33.1088	24.447	25.707	32.2107	4.33921	5.87037	5.58376	4.45983	6.59864	89	24.7099	17.9684	18.323	22.3752	3.59131	4.93126	4.83633	3.96438	4.86322
all_loops_796	chr10	17450000	17460000	chr10	17910000	17920000	41	9.5306	5.90186	7.03547	6.81225	4.26765	6.84787	5.75995	5.94596	9.28209	32	9.94238	6.3632	7.86371	7.87708	3.19645	4.96658	4.03079	4.02403	7.45389
all_loops_797	chr10	17770000	17780000	chr10	17910000	17920000	78	26.7907	26.2	28.2974	32.3059	2.90435	2.96959	2.75026	2.41006	4.66443	84	19.9855	21.8687	25.6161	24.4117	4.18709	3.82817	3.27033	3.43101	5.20943
all_loops_798	chr10	17960000	17970000	chr10	18040000	18050000	81	42.7688	37.3128	45.0744	35.2673	1.89182	2.16771	1.79526	2.29308	2.92503	52	32.5387	31.8837	37.3185	26.834	1.59627	1.62895	1.39236	1.93436	2.09314
all_loops_799	chr10	17960000	17970000	chr10	18100000	18110000	94	24.9005	20.553	32.9212	19.8203	3.76393	4.55623	2.84969	4.72382	5.25541	58	20.084	17.9913	25.3376	19.8655	2.87852	3.2115	2.28402	2.91002	3.64209
all_loops_800	chr10	18040000	18050000	chr10	18100000	18110000	99	51.7542	46.0026	51.1292	56.4375	1.91113	2.14955	1.93445	1.75282	2.57086	73	42.6491	37.011	41.5842	45.7813	1.70998	1.96977	1.75366	1.59324	2.18732
all_loops_801	chr10	18110000	18120000	chr10	18240000	18250000	101	23.2659	22.4271	20.359	32.5063	4.32681	4.48792	4.94159	3.10063	6.18151	73	22.5701	20.7508	21.387	29.4234	3.22451	3.50587	3.40206	2.47601	5.00029
all_loops_802	chr10	18170000	18180000	chr10	18240000	18250000	120	40.7839	40.1299	44.4804	52.4208	2.93758	2.98534	2.69401	2.28671	3.99719	104	40.4728	40.3568	42.7524	50.7708	2.56576	2.57311	2.42927	2.04636	3.72121
all_loops_803	chr10	18280000	18290000	chr10	18620000	18630000	34	10.7233	9.39972	11.8252	12.9609	3.1506	3.58958	2.85949	2.61084	4.45546	21	7.5466	6.96124	8.70923	8.06863	2.7594	2.98814	2.39522	2.58305	2.78575
all_loops_804	chr10	18560000	18570000	chr10	18610000	18620000	175	66.5725	56.5546	64.8249	68.193	2.62627	3.09066	2.69696	2.56395	3.70213	134	56.4769	49.3772	57.6547	58.6208	2.37023	2.71034	2.32189	2.28369	3.07586
all_loops_805	chr10	18670000	18680000	chr10	18730000	18740000	147	75.8163	70.9803	82.1176	70.61	1.93766	2.06949	1.78915	2.08033	2.51497	130	70.3864	64.8555	81.391	71.2069	1.84575	2.00291	1.59649	1.82451	2.31997
all_loops_806	chr10	18670000	18680000	chr10	18900000	18910000	124	36.6153	42.8765	45.6359	62.8476	3.38006	2.88762	2.71341	1.97148	7.04523	121	37.3148	41.5136	46.0661	61.4335	3.23669	2.91011	2.62313	1.96803	7.02069
all_loops_807	chr10	18730000	18740000	chr10	18900000	18910000	172	60.9895	50.9674	56.3886	67.282	2.81718	3.37005	3.04663	2.55409	7.46345	192	62.3583	50.9975	55.1509	70.0764	3.07565	3.75948	3.47687	2.73739	8.64227
all_loops_808	chr10	18950000	18960000	chr10	19410000	19420000	69	16.7257	16.4972	19.6826	21.957	4.1068	4.16336	3.49296	3.1328	12.1503	63	17.1729	16.1141	17.2218	19.1125	3.65313	3.89168	3.64281	3.28432	10.6556
all_loops_809	chr10	18960000	18970000	chr10	19210000	19220000	65	30.0374	30.3913	35.758	35.346	2.1601	2.13504	1.81549	1.83659	4.48377	54	26.6379	26.6728	33.6881	30.254	2.02335	2.02071	1.60116	1.7823	3.74568
all_loops_810	chr10	19210000	19220000	chr10	19400000	19410000	107	40.1492	38.8331	40.2706	57.0309	2.66092	2.75088	2.65292	1.87464	4.30384	103	39.8128	35.5998	38.9765	48.7381	2.58313	2.88797	2.63842	2.11106	4.42791
all_loops_811	chr10	19250000	19260000	chr10	19310000	19320000	186	94.7953	84.7687	92.7225	91.3137	1.96111	2.1928	2.0049	2.0358	3.22679	171	83.4253	73.4314	94.2355	73.2247	2.04848	2.3269	1.81374	2.33346	3.14697
all_loops_812	chr10	19320000	19330000	chr10	19400000	19410000	115	65.2293	53.0837	56.8496	61.8295	1.76184	2.1642	2.02109	1.85856	2.70111	75	52.0603	43.6454	42.0668	55.1927	1.43979	1.71675	1.78102	1.35823	1.90433
all_loops_813	chr10	19430000	19440000	chr10	19610000	19620000	67	23.2442	16.8298	21.3321	21.1829	2.87438	3.96342	3.13082	3.15277	5.27936	47	19.2576	14.5543	16.207	18.4359	2.43315	3.21408	2.88833	2.54101	3.78186
all_loops_814	chr10	19650000	19660000	chr10	19790000	19800000	161	52.9173	48.1657	69.2938	52.6937	3.03863	3.33777	2.32153	3.0515	6.83272	129	41.5837	40.2075	57.2241	38.7453	3.09714	3.20288	2.25211	3.32344	6.58314
all_loops_815	chr10	20080000	20090000	chr10	20650000	20660000	69	26.0357	21.2288	26.2422	30.3254	2.6439	3.23975	2.62316	2.27113	15.6925	42	19.8413	17.5548	24.6844	18.6843	2.11119	2.38462	1.69865	2.24123	8.46381
all_loops_816	chr10	20710000	20720000	chr10	20900000	20910000	77	18.7677	17.6226	22.7393	23.0749	4.08635	4.35039	3.37576	3.32688	6.55223	59	15.8147	15.0904	16.9486	16.8129	3.71355	3.89063	3.46655	3.49437	5.09688
all_loops_817	chr10	21020000	21030000	chr10	71770000	71780000	16	0.0391854	0.0441068	0.0200905	0.569379	115.673	111.723	134.066	24.0522	371.372	15	0.0266463	0.0382873	0.0486819	0.482582	119.23	109.193	101.559	25.9191	297.2
all_loops_818	chr10	21100000	21110000	chr10	21180000	21190000	145	60.3077	48.8697	53.4687	46.7639	2.40201	2.96306	2.70867	3.0962	3.3298	109	50.5648	42.933	48.8313	37.2927	2.15337	2.53526	2.22966	2.91768	2.94351
all_loops_819	chr10	21100000	21110000	chr10	21720000	21730000	187	30.5686	22.6936	20.5072	47.3474	6.1007	8.20844	9.07933	3.94332	34.511	177	22.7991	20.2453	23.1824	30.8367	7.73394	8.70473	7.60661	5.72459	34.1422
all_loops_820	chr10	21180000	21190000	chr10	21400000	21410000	89	39.2533	40.2244	42.5083	39.6466	2.26411	2.20958	2.09114	2.2417	4.07368	80	34.9	39.8763	41.4106	39.6972	2.28857	2.00369	1.92963	2.01271	4.4589
all_loops_821	chr10	21180000	21190000	chr10	21500000	21510000	65	25.6823	30.0128	37.5892	32.1861	2.52499	2.16187	1.72729	2.01635	4.6433	75	28.5933	29.0695	37.0157	25.3936	2.61734	2.57461	2.0234	2.94584	5.92201
all_loops_822	chr10	21180000	21190000	chr10	21720000	21730000	210	41.1889	37.124	29.8687	78.2603	5.08854	5.64422	7.01066	2.68121	22.21	176	33.7128	31.933	26.5777	54.154	5.20809	5.49745	6.60101	3.24584	20.0782
all_loops_823	chr10	21320000	21330000	chr10	21720000	21730000	60	24.2638	19.0258	17.3002	30.515	2.46678	3.14235	3.45399	1.96309	7.58698	41	17.7933	15.0658	15.3307	23.3423	2.29695	2.71004	2.66352	1.75324	5.83174
all_loops_824	chr10	21400000	21410000	chr10	21500000	21510000	91	45.9994	41.0719	45.4995	39.3044	1.97616	2.21267	1.99783	2.31192	2.8115	56	40.0631	34.6363	40.6618	29.0074	1.39681	1.61503	1.37629	1.92734	2.12182
all_loops_825	chr10	21400000	21410000	chr10	21710000	21720000	70	25.914	19.6144	17.3969	33.6922	2.69471	3.55578	4.00642	2.07444	7.1299	30	19.2623	16.4765	13.8297	26.4057	1.55457	1.81582	2.16085	1.13561	3.65728
all_loops_826	chr10	21500000	21510000	chr10	21710000	21720000	107	33.7821	23.4976	22.6918	33.8517	3.16096	4.53859	4.69906	3.15448	8.07388	144	32.9944	22.0017	21.1459	37.1961	4.35422	6.51985	6.78247	3.86368	12.3961
all_loops_827	chr10	21870000	21880000	chr10	21980000	21990000	51	12.1058	18.1055	23.9773	18.3486	4.18655	2.80684	2.12234	2.76986	2.93357	58	11.3874	16.4967	23.6121	21.991	5.05773	3.5007	2.45023	2.63003	3.40998
all_loops_828	chr10	21890000	21900000	chr10	22070000	22080000	132	29.3282	54.0416	61.0588	46.2632	4.48889	2.4399	2.15995	2.84924	5.87755	122	29.6016	55.7124	58.1798	43.4859	4.11089	2.18769	2.09507	2.80136	5.53409
all_loops_829	chr10	21910000	21920000	chr10	22100000	22110000	115	17.4639	37.301	33.4205	24.7269	6.5532	3.07745	3.43372	4.6361	9.23873	133	18.8484	40.2398	39.9993	36.4333	7.02433	3.29947	3.31926	3.64325	9.55371
all_loops_830	chr10	21990000	22000000	chr10	22180000	22190000	35	6.83117	13.0586	8.0292	14.3446	5.06408	2.66746	4.31777	2.42998	6.6521	21	8.37687	12.5267	8.67135	11.8321	2.48913	1.67106	2.40556	1.76834	3.85955
all_loops_831	chr10	22210000	22220000	chr10	22290000	22300000	36	16.7719	12.7312	12.1639	12.3329	2.13965	2.81345	2.9436	2.90359	2.9572	33	32.7445	20.1543	12.6821	16.8088	1.00778	1.63422	2.58955	1.95756	2.88852
all_loops_832	chr10	22300000	22310000	chr10	22490000	22500000	42	14.7141	14.4181	15.8996	18.2976	2.84189	2.89983	2.63132	2.28835	3.36573	23	10.1317	12.4403	12.7176	13.5494	2.25769	1.84206	1.80221	1.69238	1.89204
all_loops_833	chr10	22500000	22510000	chr10	22800000	22810000	37	15.9789	12.5173	13.7772	15.0017	2.30737	2.9404	2.67345	2.45668	4.17812	13	9.85088	8.08446	7.94856	8.68551	1.31647	1.60059	1.62762	1.49109	1.56469
all_loops_834	chr10	22830000	22840000	chr10	23490000	23500000	52	9.12656	7.13654	8.63602	11.7362	5.64674	7.19957	5.96381	4.40174	22.7186	24	7.04661	5.73288	7.53413	6.7747	3.37223	4.13175	3.15688	3.50561	9.41037
all_loops_835	chr10	22840000	22850000	chr10	23120000	23130000	43	15.7377	16.2036	19.0089	17.4911	2.72136	2.64359	2.25549	2.45011	4.48299	24	16.2999	16.0654	20.2185	17.8014	1.46952	1.49084	1.18611	1.34626	2.40743
all_loops_836	chr10	22840000	22850000	chr10	23330000	23340000	43	17.1227	20.2988	22.7244	23.1577	2.50252	2.11287	1.88833	1.85315	6.82256	26	11.1667	14.0064	15.3499	15.2273	2.31657	1.85023	1.68933	1.70284	3.89512
all_loops_837	chr10	23530000	23540000	chr10	23800000	23810000	91	28.057	26.8	47.1255	26.6721	3.23543	3.38661	1.92904	3.40279	6.99458	109	27.9424	28.4431	46.303	28.9152	3.89054	3.82229	2.35114	3.7601	8.50142
all_loops_838	chr10	23530000	23540000	chr10	23850000	23860000	84	38.0535	22.8164	40.2257	21.5836	2.20425	3.66986	2.08552	3.87851	7.44739	83	37.123	25.5808	46.9221	25.9304	2.23249	3.23589	1.76725	3.19242	7.07493
all_loops_839	chr10	23540000	23550000	chr10	23680000	23690000	66	28.7977	24.1762	35.9864	24.7306	2.28738	2.72283	1.83171	2.66203	3.50003	44	25.3821	23.2286	30.739	23.9499	1.73062	1.89038	1.43001	1.83369	2.36581
all_loops_840	chr10	23690000	23700000	chr10	23840000	23850000	75	36.4609	30.8583	46.4013	33.7802	2.0541	2.42584	1.61501	2.21663	4.12726	34	28.2867	25.1083	36.0494	25.1647	1.20126	1.35273	0.943307	1.34971	1.88452
all_loops_841	chr10	23700000	23710000	chr10	23800000	23810000	126	47.4921	50.8726	65.8928	47.5746	2.6496	2.47388	1.91081	2.64501	4.42465	85	34.3586	38.6909	52.2385	41.5099	2.46963	2.19381	1.62595	2.04519	3.08619
all_loops_842	chr10	23900000	23910000	chr10	24340000	24350000	42	7.44029	9.59636	11.2761	14.3512	5.58334	4.34184	3.70074	2.91326	6.8347	31	9.00201	11.4111	13.0197	15.6321	3.41683	2.70173	2.37048	1.97684	4.89948
all_loops_843	chr10	23910000	23920000	chr10	24010000	24020000	105	35.9385	31.701	35.3777	40.7729	2.91633	3.30492	2.96242	2.57139	5.04292	84	29.0649	25.835	27.5211	31.9318	2.8836	3.24272	3.04477	2.62552	4.19843
all_loops_844	chr10	24020000	24030000	chr10	24340000	24350000	98	47.9215	28.052	24.8444	45.3305	2.04284	3.48465	3.93275	2.15934	7.85138	82	39.1361	24.8624	26.7725	35.3552	2.09246	3.28895	3.05517	2.3156	7.02599
all_loops_845	chr10	24050000	24060000	chr10	24340000	24350000	79	36.3307	24.5141	25.4227	42.6339	2.17124	3.2136	3.0992	1.85099	8.0128	42	32.3839	23.4301	21.3754	34.699	1.29603	1.7892	1.96038	1.20981	4.70237
all_loops_846	chr10	24120000	24130000	chr10	24310000	24320000	74	27.002	27.2869	27.3395	40.4591	2.73412	2.70567	2.70048	1.82696	7.7234	53	26.7644	25.7561	24.4899	37.8369	1.97659	2.05367	2.15942	1.39969	5.89553
all_loops_847	chr10	24350000	24360000	chr10	24510000	24520000	55	30.05	20.8519	22.7453	25.5207	1.82753	2.62983	2.41188	2.1506	4.07205	42	24.0352	18.3542	22.7631	20.7148	1.74434	2.28133	1.8414	2.0226	3.25896
all_loops_848	chr10	24380000	24390000	chr10	24500000	24510000	72	34.684	31.977	38.0169	38.5124	2.07279	2.24771	1.89155	1.86727	3.77028	51	27.3826	28.9076	32.1758	34.5871	1.85936	1.76161	1.58323	1.47317	2.76722
all_loops_849	chr10	24680000	24690000	chr10	24930000	24940000	117	31.6942	29.9162	35.0883	37.5968	3.68306	3.90123	3.32781	3.10636	9.68496	59	20.5919	19.9402	21.5014	25.3959	2.85619	2.94907	2.73593	2.31802	5.34341
all_loops_850	chr10	24980000	24990000	chr10	25200000	25210000	133	37.2582	28.1232	37.3515	36.5049	3.5628	4.71598	3.55393	3.63613	10.4333	122	32.8553	25.8151	35.8091	30.7874	3.70502	4.71154	3.40025	3.95306	10.1036
all_loops_851	chr10	25400000	25410000	chr10	25850000	25860000	137	28.8904	32.7117	38.0119	33.7546	4.72915	4.17839	3.5973	4.04967	17.9933	119	29.8374	31.1835	37.8575	36.6866	3.9783	3.80712	3.13772	3.23759	15.1025
all_loops_852	chr10	25400000	25410000	chr10	26060000	26070000	31	10.4617	9.03569	10.3547	9.64569	2.94459	3.40423	2.97472	3.19115	7.0156	12	7.83367	7.54217	9.65017	6.98473	1.52515	1.58332	1.241	1.7079	2.46242
all_loops_853	chr10	26090000	26100000	chr10	26470000	26480000	99	28.0644	21.6335	34.069	19.959	3.51863	4.55978	2.90029	4.94043	9.44205	63	26.0643	19.8741	33.1268	16.7896	2.41168	3.15909	1.89907	3.73603	6.08649
all_loops_854	chr10	26090000	26100000	chr10	26610000	26620000	51	14.0675	14.2314	19.2387	16.9214	3.60686	3.56559	2.64237	3.0021	7.41395	43	11.8701	12.9503	18.1866	15.69	3.60063	3.30261	2.35691	2.72958	5.98353
all_loops_855	chr10	26210000	26220000	chr10	26470000	26480000	50	20.176	16.5268	20.4064	17.0137	2.4709	3.01321	2.44314	2.92748	4.4953	16	14.6507	12.1311	13.678	11.9565	1.09147	1.31632	1.16853	1.33538	1.52467
all_loops_856	chr10	26210000	26220000	chr10	26610000	26620000	31	8.93642	9.69035	10.3365	11.9102	3.44163	3.1766	2.97992	2.58946	4.67934	17	7.87556	8.22597	7.5851	10.2752	2.14405	2.05381	2.22509	1.64817	2.55299
all_loops_857	chr10	26430000	26440000	chr10	26610000	26620000	118	60.1487	41.6564	37.1828	67.87	1.96021	2.82831	3.16768	1.73753	5.00356	119	66.4927	44.1977	39.8863	71.3572	1.78848	2.68863	2.97852	1.66673	5.01855
all_loops_858	chr10	26470000	26480000	chr10	26600000	26610000	136	50.5138	43.8083	49.1105	62.7636	2.68899	3.09964	2.76567	2.165	5.53133	145	49.69	43.8619	45.068	62.5869	2.91424	3.30058	3.21245	2.31468	5.98746
all_loops_859	chr10	26640000	26650000	chr10	26710000	26720000	120	44.4488	46.6373	55.193	57.8901	2.69592	2.56968	2.17206	2.07104	3.10353	98	37.1939	38.2885	44.5052	44.3677	2.63046	2.55546	2.19929	2.2061	2.80177
all_loops_860	chr10	26760000	26770000	chr10	27230000	27240000	38	14.8323	15.0631	15.4511	14.582	2.55152	2.51269	2.44999	2.59502	3.98588	16	15.4732	14.9064	15.8243	15.2452	1.03383	1.07288	1.01103	1.04919	1.72475
all_loops_861	chr10	26790000	26800000	chr10	100650000	100660000	15	0.0139492	0.012793	0.284438	0	132.515	133.874	39.2781	151	315.682	7	0.0707275	0.0404809	0.311674	0.0466118	41.5867	50.5407	17.2467	48.4272	141.45
all_loops_862	chr10	26850000	26860000	chr10	27390000	27400000	72	18.6586	19.5194	24.4107	21.8287	3.84358	3.67493	2.94157	3.28793	13.145	61	17.9251	18.7743	22.5326	21.1652	3.38972	3.23721	2.69965	2.87324	11.5531
all_loops_863	chr10	26850000	26860000	chr10	27470000	27480000	63	23.6994	21.2408	26.6514	25.2872	2.65133	2.95678	2.35876	2.4855	11.3812	65	22.7436	21.1194	26.2297	23.9965	2.84981	3.06795	2.4725	2.70164	11.6603
all_loops_864	chr10	28190000	28200000	chr10	28560000	28570000	38	17.4083	13.1944	12.9188	15.8748	2.17611	2.86587	2.92655	2.38501	3.48834	12	10.1901	7.30902	6.46482	10.1212	1.17589	1.63314	1.84316	1.18381	1.09518
all_loops_865	chr10	28690000	28700000	chr10	28800000	28810000	64	29.861	29.2356	32.9271	30.4033	2.13945	2.18506	1.94083	2.10141	2.60775	12	18.8167	15.9535	15.8074	11.8094	0.639648	0.753728	0.760651	1.016	0.558918
all_loops_866	chr10	28800000	28810000	chr10	28920000	28930000	86	23.7683	22.9138	23.2106	26.4026	3.6073	3.74124	3.69359	3.24873	5.13418	40	18.4196	18.3832	21.5829	21.0626	2.16527	2.16954	1.84938	1.89485	2.73436
all_loops_867	chr10	28800000	28810000	chr10	29050000	29060000	41	17.6844	14.389	17.2253	15.7947	2.31101	2.83663	2.37225	2.58576	3.99369	42	17.635	13.691	18.2056	13.5336	2.37384	3.05272	2.29984	3.08796	4.12297
all_loops_868	chr10	28810000	28820000	chr10	29030000	29040000	62	26.376	23.3775	27.7205	24.8837	2.34552	2.64508	2.23216	2.48562	3.84903	53	23.0681	23.4344	31.5795	21.4103	2.29194	2.25627	1.67616	2.46859	3.14344
all_loops_869	chr10	29250000	29260000	chr10	29520000	29530000	98	34.9306	30.3324	34.9498	37.5635	2.80041	3.22353	2.79887	2.60464	6.80704	78	21.0755	21.7241	27.3581	22.5545	3.68822	3.57861	2.84433	3.44744	5.74797
all_loops_870	chr10	29250000	29260000	chr10	30130000	30140000	78	15.2844	18.4795	21.4837	20.4105	5.07658	4.20356	3.61847	3.8078	17.754	65	16.2928	18.0825	19.9837	20.7832	3.97125	3.58036	3.24144	3.11734	14.4949
all_loops_871	chr10	29260000	29270000	chr10	29800000	29810000	45	13.4177	16.6624	21.6132	16.043	3.33636	2.69054	2.07708	2.79378	8.51593	13	12.3947	13.4126	16.0254	14.2741	1.04844	0.969462	0.812382	0.911362	2.55699
all_loops_872	chr10	29530000	29540000	chr10	29800000	29810000	64	22.1204	21.6745	26.1881	22.2971	2.88474	2.94381	2.43836	2.86198	5.33799	27	14.3904	16.0757	15.2907	18.4222	1.8702	1.67535	1.7608	1.46311	2.48199
all_loops_873	chr10	29530000	29540000	chr10	30130000	30140000	55	15.4914	17.9848	19.9774	23.0568	3.53401	3.04677	2.74438	2.37943	6.37952	25	15.8065	18.0055	16.9726	21.8063	1.57797	1.38632	1.47019	1.14579	2.93469
all_loops_874	chr10	29850000	29860000	chr10	30130000	30140000	145	36.5165	36.7707	43.675	45.4161	3.96269	3.93538	3.31468	3.18788	7.69937	54	22.7445	21.8046	23.5276	26.086	2.36818	2.4698	2.28969	2.06599	3.24223
all_loops_875	chr10	30340000	30350000	chr10	30430000	30440000	110	45.3274	40.4576	44.5654	47.2094	2.42365	2.71466	2.465	2.32723	3.712	78	39.4737	36.4754	37.8803	45.518	1.97353	2.13531	2.05633	1.71204	2.65501
all_loops_876	chr10	30340000	30350000	chr10	30520000	30530000	115	32.5175	26.2474	30.0396	40.7261	3.52878	4.36855	3.8189	2.81927	5.50454	115	32.0007	28.6163	31.6333	42.3745	3.5856	4.00817	3.6271	2.70986	5.52904
all_loops_877	chr10	30440000	30450000	chr10	30520000	30530000	143	71.2872	55.5333	63.2267	67.7845	2.00456	2.5722	2.25971	2.10799	3.44661	140	66.7288	55.2229	54.0952	69.7324	2.0964	2.5324	2.5851	2.00623	3.35994
all_loops_878	chr10	30540000	30550000	chr10	31020000	31030000	126	28.1982	16.812	24.6313	20.7189	4.45611	7.45622	5.09881	6.05699	20.834	86	23.8463	13.9195	16.4378	16.2967	3.59554	6.14146	5.20626	5.25106	14.3491
all_loops_879	chr10	31050000	31060000	chr10	31160000	31170000	74	36.5252	33.0304	36.3012	38.3853	2.0232	2.23661	2.03565	1.92541	2.60637	49	28.2059	25.0559	28.8096	28.5542	1.73462	1.95183	1.6984	1.71353	2.01422
all_loops_880	chr10	31240000	31250000	chr10	31320000	31330000	101	43.651	45.1501	49.0005	57.6389	2.3108	2.23425	2.05904	1.75099	2.87795	71	43.4429	44.3677	42.8231	56.6112	1.63287	1.59891	1.65645	1.25372	2.1472
all_loops_881	chr10	31460000	31470000	chr10	32600000	32610000	39	9.26136	12.3221	19.5249	11.5731	4.17674	3.14762	1.99237	3.34958	12.5311	23	6.8898	9.5606	12.4303	8.90352	3.30482	2.39116	1.84353	2.56566	7.3504
all_loops_882	chr10	31460000	31470000	chr10	33020000	33030000	39	7.43402	6.61341	7.32196	7.74579	5.18979	5.82417	5.26815	4.98357	24.4587	38	7.92322	7.17349	9.32556	8.8197	4.74872	5.2382	4.0422	4.27145	23.2897
all_loops_883	chr10	32430000	32440000	chr10	32600000	32610000	91	33.7709	28.8301	30.7672	36.0561	2.68962	3.14897	2.95135	2.51963	4.0556	54	28.7029	25.0567	27.0012	31.6247	1.87829	2.15052	1.99622	1.70529	2.75123
all_loops_884	chr10	3260000	3270000	chr10	3450000	3460000	77	22.5856	24.1465	27.5886	39.6395	3.39863	3.17985	2.78454	1.94014	4.76577	61	21.702	23.6651	25.7034	35.7126	2.80249	2.571	2.36791	1.7061	4.09448
all_loops_885	chr10	32620000	32630000	chr10	33010000	33020000	79	34.2214	27.7126	35.022	37.326	2.30469	2.84403	2.25215	2.11351	5.38286	62	35.1453	29.2447	34.3135	34.65	1.76194	2.11623	1.80453	1.78705	4.24957
all_loops_886	chr10	33040000	33050000	chr10	33420000	33430000	72	35.3882	28.5119	32.9197	30.9762	2.03166	2.51993	2.18355	2.32011	6.07404	36	28.9196	23.3999	27.2367	27.5159	1.24399	1.53618	1.32057	1.30722	3.0674
all_loops_887	chr10	3330000	3340000	chr10	3450000	3460000	78	31.7004	29.7742	27.3735	41.4207	2.45594	2.6143	2.84274	1.88099	3.33478	58	27.4064	27.4748	25.6786	36.3881	2.11224	2.10699	2.25381	1.5923	2.8394
all_loops_888	chr10	33870000	33880000	chr10	33990000	34000000	86	34.56	37.1214	46.2482	42.4309	2.48413	2.31318	1.85768	2.02441	3.0697	51	29.8457	32.5998	34.7574	37.0761	1.70642	1.5627	1.46597	1.37454	1.92597
all_loops_889	chr10	3400000	3410000	chr10	3750000	3760000	52	6.86866	8.18517	9.25435	8.63693	7.47634	6.28835	5.5696	5.96319	5.25279	55	7.11325	8.17554	9.43115	7.85067	7.63872	6.65818	5.78104	6.93023	5.62377
all_loops_890	chr10	36730000	36740000	chr10	36850000	36860000	56	22.2762	16.2538	18.2303	15.0175	2.50713	3.43039	3.0605	3.71093	1.87401	27	17.3668	13.1954	13.3326	13.3616	1.55152	2.0383	2.01748	2.01313	0.984206
all_loops_891	chr10	36730000	36740000	chr10	37980000	37990000	32	9.60219	7.82734	8.01312	11.9968	3.30853	4.04928	3.95655	2.65359	26.4388	14	8.36251	6.83238	6.94938	8.90603	1.66617	2.03393	2.00018	1.56562	10.8002
all_loops_892	chr10	36790000	36800000	chr10	37980000	37990000	36	10.3801	10.5195	11.2983	13.0542	3.44464	3.39942	3.16714	2.74437	27.4491	33	10.8821	10.8709	10.5598	13.1105	3.01399	3.01708	3.10511	2.50558	22.697
all_loops_893	chr10	38590000	38600000	chr10	38760000	38770000	126	39.7334	31.4466	40.7674	32.3133	3.16569	3.99726	3.08559	3.89037	5.77715	106	38.1182	30.542	40.2845	33.0337	2.77616	3.46256	2.62724	3.20217	5.15338
all_loops_894	chr10	38890000	38900000	chr10	39240000	39250000	94	30.1314	25.5588	26.7234	34.24	3.11266	3.66736	3.50813	2.74025	10.522	77	26.7461	21.5166	26.0873	26.8091	2.87193	3.5667	2.94417	2.8652	8.88861
all_loops_895	chr10	38950000	38960000	chr10	39240000	39250000	57	22.6145	22.2108	22.1109	26.7534	2.51381	2.5593	2.57081	2.12636	6.66737	32	16.7641	18.6106	15.3629	24.6906	1.90346	1.71561	2.07594	1.29484	3.84312
all_loops_896	chr10	39770000	39780000	chr10	39930000	39940000	220	45.8275	39.9679	51.3874	54.4773	4.79234	5.49317	4.27483	4.03281	10.2672	181	41.1492	33.2555	43.3886	39.9531	4.39039	5.42939	4.16431	4.5215	9.72719
all_loops_897	chr10	39850000	39860000	chr10	39930000	39940000	106	53.2439	50.8726	51.4181	61.4807	1.98898	2.08151	2.05947	1.72294	3.20169	64	38.6053	39.4761	40.9657	43.6643	1.6561	1.61966	1.56091	1.46466	2.12927
all_loops_898	chr10	39980000	39990000	chr10	40240000	40250000	116	28.4385	22.0857	28.6424	31.0084	4.06818	5.23311	4.03933	3.73211	10.3969	106	29.662	21.4754	27.3671	34.8414	3.56495	4.91763	3.8628	3.03651	9.41762
all_loops_899	chr10	40090000	40100000	chr10	40240000	40250000	152	56.6622	53.1403	51.0773	72.72	2.6796	2.85686	2.97202	2.08871	5.273	110	57.676	50.031	47.0597	65.5709	1.90564	2.19625	2.33462	1.67654	4.1131
all_loops_900	chr10	40370000	40380000	chr10	40600000	40610000	65	20.9393	21.845	30.5785	23.403	3.09421	2.9665	2.122	2.76986	5.39906	53	16.7459	19.6874	25.3913	19.5007	3.15211	2.68353	2.08307	2.70909	4.29903
all_loops_901	chr10	40720000	40730000	chr10	40990000	41000000	44	17.6076	17.4264	22.0257	18.7403	2.49046	2.51621	1.99316	2.34073	4.87245	35	13.7532	14.6368	19.8391	12.3612	2.53371	2.38179	1.76036	2.81674	3.87046
all_loops_902	chr10	40720000	40730000	chr10	41120000	41130000	40	14.1948	11.3548	14.7233	15.0904	2.80522	3.50072	2.7052	2.63983	6.92979	29	13.0257	10.5681	14.0849	11.9904	2.21702	2.72777	2.05147	2.40687	5.23247
all_loops_903	chr10	40720000	40730000	chr10	41220000	41230000	32	6.20243	5.32899	6.863	6.09409	5.09327	5.9127	4.61008	5.18236	5.8658	31	6.53905	6.0569	8.3022	6.78209	4.68441	5.05125	3.70141	4.51898	5.68156
all_loops_904	chr10	41020000	41030000	chr10	41120000	41130000	73	33.8998	28.5519	33.5833	31.0113	2.15001	2.55132	2.17022	2.34963	2.81209	35	30.3461	26.1372	31.7703	28.662	1.15286	1.33779	1.10134	1.22036	1.44994
all_loops_905	chr10	41020000	41030000	chr10	41220000	41230000	49	14.4	12.7869	18.0807	14.905	3.3862	3.81008	2.70066	3.27225	2.84994	50	18.8937	17.371	22.2803	21.604	2.63772	2.86761	2.23858	2.30833	2.95748
all_loops_906	chr10	41020000	41030000	chr10	41410000	41420000	28	9.56973	10.4669	12.2824	10.8598	2.90598	2.65924	2.26934	2.56392	3.08922	14	10.7829	12.5855	12.3959	15.6404	1.29561	1.1115	1.12837	0.895785	1.54773
all_loops_907	chr10	41150000	41160000	chr10	41220000	41230000	127	48.6616	37.7614	37.8964	44.016	2.60656	3.35698	3.34505	2.88104	4.20308	86	39.0621	31.7549	31.3322	34.3247	2.19855	2.70288	2.73923	2.50111	3.19479
all_loops_908	chr10	41150000	41160000	chr10	41410000	41420000	39	16.5804	14.1355	15.431	18.897	2.34407	2.74665	2.51754	2.05822	3.93784	42	14.5872	13.3652	12.5116	19.0033	2.86644	3.12657	3.33821	2.2038	4.67397
all_loops_909	chr10	41230000	41240000	chr10	41400000	41410000	182	41.5661	28.7137	35.1211	34.1519	4.37046	6.3199	5.1702	5.3165	12.3838	137	35.4527	24.7703	29.3101	34.071	3.85625	5.5126	4.66166	4.01217	10.6346
all_loops_910	chr10	41550000	41560000	chr10	41680000	41690000	59	25.266	22.8036	30.1113	23.4371	2.32989	2.58038	1.95622	2.51093	3.50196	38	23.6699	22.1856	31.3758	21.9585	1.60287	1.70962	1.21045	1.72722	2.32695
all_loops_911	chr10	41550000	41560000	chr10	42010000	42020000	70	16.6643	16.8502	18.0991	23.4378	4.18151	4.13565	3.85184	2.97819	8.99884	67	18.5611	16.2324	21.0007	21.8806	3.59572	4.10841	3.17999	3.05269	8.92739
all_loops_912	chr10	41700000	41710000	chr10	42010000	42020000	153	33.1463	28.6645	31.8727	47.3659	4.60502	5.32254	4.78846	3.22548	12.7416	141	29.3234	27.0732	34.6233	40.78	4.7955	5.19261	4.06355	3.45156	13.0405
all_loops_913	chr10	41790000	41800000	chr10	42010000	42020000	82	28.8116	26.6616	29.6689	40.6894	2.83969	3.06783	2.75792	2.01278	5.70932	63	20.429	21.3262	23.1261	29.8552	3.07371	2.94499	2.71677	2.10648	5.26657
all_loops_914	chr10	42020000	42030000	chr10	42450000	42460000	37	15.4254	10.2292	13.5457	10.4634	2.38963	3.59174	2.71881	3.51214	6.10882	38	15.2094	10.9406	13.1095	13.3055	2.48866	3.45089	2.8843	2.84211	6.63741
all_loops_915	chr10	42170000	42180000	chr10	42230000	42240000	96	48.0963	46.5663	43.0553	53.6673	1.99393	2.0593	2.22684	1.78733	2.92737	43	42.199	44.0689	39.0792	46.54	1.01894	0.9758	1.10007	0.9241	1.36818
all_loops_916	chr10	42410000	42420000	chr10	42460000	42470000	87	43.0362	40.5162	46.7116	40.3909	2.01919	2.14446	1.86065	2.1511	2.47437	57	34.6775	34.9218	37.4674	35.7579	1.64186	1.63041	1.51993	1.5924	1.71329
all_loops_917	chr10	42560000	42570000	chr10	42660000	42670000	65	30.7669	28.9735	35.2021	30.8721	2.10906	2.23915	1.84408	2.10189	3.20458	41	21.2	20.8332	27.8189	21.0918	1.92958	1.96339	1.47212	1.93943	2.15805
all_loops_918	chr10	43200000	43210000	chr10	43250000	43260000	117	62.0827	50.2317	59.4234	62.3184	1.88316	2.32657	1.96729	1.87605	2.72022	89	52.5247	51.1395	53.8863	57.88	1.69312	1.73889	1.65042	1.53674	2.22131
all_loops_919	chr10	43290000	43300000	chr10	43630000	43640000	156	39.7601	30.4889	45.1714	35.4644	3.91619	5.10316	3.44809	4.38921	15.7105	128	42.0981	30.9404	48.1346	38.2955	3.03568	4.12688	2.65577	3.33632	12.3197
all_loops_920	chr10	43290000	43300000	chr10	43790000	43800000	54	11.7559	11.7792	19.3393	12.3675	4.56314	4.55419	2.78302	4.33927	7.54669	31	12.3135	12.4469	16.313	14.6444	2.50535	2.47871	1.89484	2.10927	4.21874
all_loops_921	chr10	43670000	43680000	chr10	43780000	43790000	145	34.8885	33.929	45.4887	47.794	4.14707	4.26402	3.1828	3.02961	5.33616	126	29.3742	29.8501	39.402	41.6415	4.27832	4.21034	3.19224	3.02098	5.06278
all_loops_922	chr10	43670000	43680000	chr10	43870000	43880000	55	17.9537	16.6958	22.0153	21.8314	3.052	3.28059	2.49149	2.51238	4.13963	56	18.6793	17.7382	21.7751	24.2571	2.98734	3.14494	2.56456	2.30323	4.43928
all_loops_923	chr10	44590000	44600000	chr10	44880000	44890000	30	2.13007	4.12973	5.74238	4.95662	13.4974	7.11629	5.15201	5.9526	4.18975	34	4.47102	5.46226	5.80444	5.76055	7.46004	6.13061	5.77532	5.81857	4.40381
all_loops_924	chr10	45100000	45110000	chr10	45230000	45240000	52	15.1976	12.712	15.063	12.1233	3.40576	4.06651	3.43599	4.26236	4.04544	33	13.9431	11.8232	13.5826	11.4484	2.35703	2.77609	2.41914	2.8662	2.61847
all_loops_925	chr10	45100000	45110000	chr10	45520000	45530000	27	6.49412	6.68164	8.08099	6.02072	4.10972	3.99608	3.31256	4.42758	4.41312	9	6.71961	8.07646	7.19956	8.02627	1.33439	1.11295	1.24665	1.11983	1.40676
all_loops_926	chr10	45100000	45110000	chr10	45630000	45640000	33	9.85633	8.55085	9.67798	9.41907	3.32452	3.82621	3.38516	3.47723	5.78113	30	10.5825	8.92603	8.28992	10.0557	2.81768	3.3348	3.58764	2.96385	5.07471
all_loops_927	chr10	45390000	45400000	chr10	45520000	45530000	58	26.7959	25.1062	26.7684	29.489	2.16018	2.30499	2.16239	1.96357	2.33549	43	23.8103	23.804	25.6908	26.3571	1.80257	1.80304	1.67114	1.62905	1.69178
all_loops_928	chr10	45390000	45400000	chr10	45630000	45640000	97	24.8957	22.5106	24.5701	30.5694	3.88468	4.29445	3.93593	3.16602	5.61635	77	21.9488	20.5773	22.2175	24.3201	3.49679	3.72873	3.45469	3.15723	4.36033
all_loops_929	chr10	4550000	4560000	chr10	4740000	4750000	110	30.2333	23.7237	41.0409	23.0673	3.62968	4.62146	2.67617	4.7524	9.37338	105	27.186	20.6269	32.5944	23.9648	3.85179	5.0707	3.21461	4.36737	9.1536
all_loops_930	chr10	4560000	4570000	chr10	4700000	4710000	181	45.452	46.84	80.1294	45.345	3.97568	3.85812	2.25728	3.98504	6.95205	109	38.6805	43.9233	72.2669	37.9573	2.81327	2.47823	1.50759	2.86673	4.45923
all_loops_931	chr10	4790000	4800000	chr10	5010000	5020000	51	24.4864	20.7597	28.4283	21.3845	2.07839	2.4497	1.79121	2.37846	3.58785	22	16.2663	16.2386	19.0104	15.5846	1.35033	1.35263	1.15644	1.40903	1.82625
all_loops_932	chr10	4790000	4800000	chr10	5150000	5160000	43	12.0338	14.8461	18.3641	17.5039	3.55207	2.88369	2.33426	2.44833	4.59475	34	9.88713	12.7553	16.3344	15.2065	3.41439	2.65261	2.07492	2.22781	4.02999
all_loops_933	chr10	49330000	49340000	chr10	49720000	49730000	24	5.00678	5.36212	5.11222	5.51637	4.71922	4.4122	4.62375	4.29103	3.1352	20	5.3326	5.79923	6.05292	6.00172	3.69988	3.40723	3.26674	3.29415	2.51557
all_loops_934	chr10	5040000	5050000	chr10	5150000	5160000	101	45.2825	44.6705	51.0585	59.1915	2.22773	2.25818	1.97621	1.70514	3.58635	81	36.1463	36.5748	40.2132	52.428	2.23747	2.21133	2.01175	1.54394	3.3937
all_loops_935	chr10	50420000	50430000	chr10	51120000	51130000	33	6.09743	6.41615	8.63826	9.37593	5.34093	5.07969	3.78794	3.49306	10.5439	12	2.93488	3.27134	4.27661	4.41106	3.98698	3.58908	2.7647	2.6823	3.42994
all_loops_936	chr10	51270000	51280000	chr10	51370000	51380000	83	22.261	22.589	26.5771	35.7339	3.7163	3.66256	3.11503	2.31903	3.49195	53	22.1589	21.6784	22.6479	29.8968	2.38557	2.43819	2.33429	1.77019	2.3154
all_loops_937	chr10	51270000	51280000	chr10	51490000	51500000	54	21.9328	17.8271	18.1511	28.6973	2.45543	3.01778	2.9642	1.87865	3.75056	51	25.8074	19.9721	20.7669	35.9898	1.97241	2.54582	2.44886	1.41591	3.58097
all_loops_938	chr10	51310000	51320000	chr10	51490000	51500000	69	18.3711	20.2485	21.5675	31.1851	3.74097	3.39583	3.18911	2.20872	4.25065	78	19.1258	21.1528	21.4967	33.7501	4.06224	3.67481	3.6163	2.30723	4.85266
all_loops_939	chr10	51320000	51330000	chr10	51370000	51380000	131	59.9746	60.1343	63.6744	63.6837	2.18229	2.1765	2.05568	2.05539	1.99019	92	59.5935	63.1032	63.9136	67.5389	1.54288	1.4572	1.43876	1.36164	1.38674
all_loops_940	chr10	51370000	51380000	chr10	51490000	51500000	127	52.3149	46.9543	37.2095	68.6976	2.42488	2.70113	3.40664	1.84745	3.20087	90	47.9451	44.9874	41.1049	69.2171	1.87532	1.99834	2.18663	1.29982	2.29831
all_loops_941	chr10	51510000	51520000	chr10	51790000	51800000	78	20.6111	19.0682	30.2801	22.9974	3.77092	4.07445	2.57076	3.38133	7.4723	68	23.8219	19.7288	29.2409	22.84	2.84676	3.43441	2.32099	2.96862	6.31164
all_loops_942	chr10	51820000	51830000	chr10	52050000	52060000	56	23.0224	21.3907	27.8131	21.4613	2.42622	2.61044	2.00981	2.60188	3.79365	38	19.4312	19.2884	22.5428	22.9061	1.95072	1.96509	1.68265	1.65609	2.57812
all_loops_943	chr10	52470000	52480000	chr10	53030000	53040000	36	15.8264	13.2189	16.8607	15.0674	2.26668	2.71044	2.12845	2.38011	6.46768	13	13.7631	10.2337	14.4124	12.5425	0.944953	1.2677	0.902675	1.03618	2.26689
all_loops_944	chr10	52830000	52840000	chr10	53020000	53030000	39	11.3367	11.4535	13.4217	13.0604	3.41881	3.38427	2.89165	2.97103	4.13693	9	6.5632	5.89787	6.4448	6.20246	1.36571	1.51721	1.39042	1.44388	1.11325
all_loops_945	chr10	53060000	53070000	chr10	53240000	53250000	113	37.2986	28.8813	39.5389	32.2245	3.02418	3.90252	2.85326	3.4989	5.99399	75	32.3808	27.0879	34.0877	32.1328	2.31214	2.76226	2.1967	2.32993	4.30544
all_loops_946	chr10	53580000	53590000	chr10	53790000	53800000	52	21.5794	17.7085	19.9435	18.4889	2.4032	2.92556	2.59934	2.80274	3.17586	26	17.6293	14.2465	14.2205	14.5994	1.47214	1.81925	1.82257	1.77559	1.89466
all_loops_947	chr10	53580000	53590000	chr10	54270000	54280000	28	6.06221	8.04541	9.29825	8.05666	4.56005	3.4498	2.98992	3.44504	8.79051	5	7.09512	7.47319	8.3009	8.19718	0.708813	0.673428	0.607078	0.614666	1.59295
all_loops_948	chr10	56080000	56090000	chr10	56900000	56910000	57	15.4973	12.988	16.8275	12.9503	3.66089	4.36277	3.3732	4.37538	16.1639	24	12.9098	12.3322	15.8548	12.2715	1.85245	1.93852	1.51052	1.94803	6.17258
all_loops_949	chr10	56080000	56090000	chr10	57030000	57040000	50	12.7725	14.1778	20.769	14.2127	3.89203	3.50894	2.40069	3.50038	15.3294	22	12.1668	12.6618	17.3237	12.4069	1.80161	1.73173	1.26838	1.76703	6.38597
all_loops_950	chr10	56090000	56100000	chr10	56720000	56730000	79	12.6497	12.3616	17.0235	13.6513	6.20409	6.34752	4.61938	5.7522	20.3466	64	13.397	12.945	18.8067	14.2505	4.74919	4.91375	3.39033	4.46675	15.501
all_loops_951	chr10	56090000	56100000	chr10	57160000	57170000	46	13.8874	11.5818	15.1339	12.1145	3.29583	3.9463	3.02615	3.77422	17.5723	44	9.48359	10.2828	10.5956	7.90034	4.60161	4.24739	4.1232	5.51227	14.2137
all_loops_952	chr10	56720000	56730000	chr10	57030000	57040000	65	19.4314	19.265	19.0941	24.7359	3.3331	3.36173	3.39168	2.6212	5.58833	33	16.4565	16.4159	16.7426	18.0332	1.99921	2.00413	1.96526	1.82538	3.06337
all_loops_953	chr10	56900000	56910000	chr10	57030000	57040000	91	34.1681	33.536	31.8057	42.8833	2.65845	2.7084	2.85529	2.11943	3.13926	41	25.4296	25.3627	24.1353	27.1148	1.60989	1.61412	1.69588	1.51021	1.60086
all_loops_954	chr10	57460000	57470000	chr10	57510000	57520000	106	41.7684	40.56	50.6066	38.0856	2.53413	2.60944	2.09243	2.77853	2.75711	85	37.9488	36.5505	42.176	33.8938	2.2366	2.32193	2.01296	2.5034	2.41798
all_loops_955	chr10	57730000	57740000	chr10	57920000	57930000	67	25.6953	19.9614	27.6169	20.0334	2.60125	3.34472	2.4209	3.33277	4.18351	60	29.4291	23.2315	32.3922	23.7582	2.03528	2.57592	1.84967	2.51905	3.50191
all_loops_956	chr10	57820000	57830000	chr10	57910000	57920000	97	36.3144	38.4406	43.5435	48.329	2.66653	2.51942	2.22484	2.005	3.14104	48	33.1288	36.1322	39.6723	40.6298	1.44754	1.32755	1.20938	1.18095	1.72188
all_loops_957	chr10	58630000	58640000	chr10	58750000	58760000	76	20.2112	19.2657	23.19	26.0462	3.74671	3.92962	3.26749	2.91055	5.80564	63	20.6141	18.6159	22.5281	25.2572	3.04623	3.37147	2.78857	2.48844	4.98508
all_loops_958	chr10	58760000	58770000	chr10	58810000	58820000	167	64.0115	54.261	61.1309	63.0091	2.6064	3.0739	2.72902	2.6478	3.14595	122	63.0463	52.0868	56.6976	61.2813	1.9336	2.33967	2.14974	1.9892	2.34978
all_loops_959	chr10	58830000	58840000	chr10	59320000	59330000	60	27.1006	17.2472	22.2538	22.6891	2.20951	3.46453	2.68858	2.63723	12.9537	53	31.5114	18.8515	23.2887	25.0813	1.67977	2.80189	2.27033	2.10871	10.6488
all_loops_960	chr10	58910000	58920000	chr10	59320000	59330000	52	21.5259	17.7207	21.2782	25.1075	2.40915	2.92356	2.43706	2.06684	9.75435	46	21.6717	19.59	23.4313	24.88	2.11743	2.34129	1.95909	1.84548	8.41686
all_loops_961	chr10	59350000	59360000	chr10	59410000	59420000	122	56.4642	46.7282	57.1373	57.1809	2.15861	2.6074	2.13322	2.1316	3.76323	104	62.9038	52.9403	66.3406	59.8234	1.65228	1.96266	1.56681	1.73722	3.39325
all_loops_962	chr10	59610000	59620000	chr10	59690000	59700000	122	35.9287	34.5093	35.6567	41.8779	3.38897	3.52795	3.41474	2.90867	4.69318	91	34.0143	33.3127	39.9791	42.3671	2.67043	2.72651	2.27301	2.14519	3.48969
all_loops_963	chr10	5970000	5980000	chr10	6250000	6260000	72	34.5887	31.1878	38.517	39.7075	2.07849	2.30442	1.86705	1.81122	8.48065	68	39.0513	35.3228	41.0425	40.0348	1.7394	1.92249	1.65522	1.69678	7.88147
all_loops_964	chr10	5970000	5980000	chr10	6350000	6360000	60	32.2106	21.6366	33.6552	24.572	1.86007	2.76492	1.78046	2.43596	8.52038	63	33.579	24.1591	34.9837	31.6481	1.87357	2.60109	1.79856	1.98752	8.82126
all_loops_965	chr10	59870000	59880000	chr10	60150000	60160000	45	14.1065	15.4646	17.8478	16.8603	3.17459	2.89759	2.51284	2.65914	7.58665	33	15.6965	16.1592	18.643	17.5805	2.09541	2.03577	1.76599	1.87211	5.50215
all_loops_966	chr10	59870000	59880000	chr10	60210000	60220000	71	18.7024	13.8418	18.5313	18.1021	3.78144	5.09976	3.81615	3.90614	10.5564	79	19.6562	14.4509	20.0044	14.9917	4.0038	5.4361	3.93447	5.24131	11.5467
all_loops_967	chr10	59990000	60000000	chr10	60210000	60220000	53	14.6368	12.2281	15.7475	11.8195	3.60323	4.30722	3.35069	4.4549	5.54765	35	13.1981	11.0472	14.2264	11.2716	2.63947	3.14877	2.45002	3.08663	3.81439
all_loops_968	chr10	6010000	6020000	chr10	6250000	6260000	105	38.2769	50.3537	54.9218	63.7707	2.73863	2.0831	1.91015	1.64551	7.97321	93	50.6516	54.9997	59.139	65.5008	1.83443	1.68967	1.5716	1.41919	7.41848
all_loops_969	chr10	60230000	60240000	chr10	60520000	60530000	93	19.1168	19.8128	23.414	29.7096	4.84471	4.67538	3.95934	3.12316	9.90869	73	20.1639	21.1918	23.973	32.9766	3.60741	3.43324	3.03659	2.21002	8.07819
all_loops_970	chr10	60240000	60250000	chr10	60290000	60300000	176	71.3332	56.6987	79.8136	57.1298	2.46524	3.10042	2.20363	3.07707	3.21379	209	83.7866	62.6281	88.2098	66.5858	2.49265	3.33343	2.3678	3.1356	4.32027
all_loops_971	chr10	60290000	60300000	chr10	60520000	60530000	131	47.2534	37.966	38.9624	58.1646	2.76854	3.44401	3.35617	2.25008	8.66127	118	45.6648	37.8162	33.6194	59.5793	2.58059	3.11477	3.50244	1.97891	8.32416
all_loops_972	chr10	60660000	60670000	chr10	60790000	60800000	189	36.4944	36.7281	48.1029	42.1834	5.16746	5.13467	3.923	4.4722	9.11214	154	32.1349	32.4749	43.4384	37.7068	4.78053	4.73063	3.5394	4.07598	8.0901
all_loops_973	chr10	60800000	60810000	chr10	60860000	60870000	123	39.8102	34.2072	34.8458	35.5874	3.08442	3.58817	3.52259	3.4494	4.80292	113	35.7655	32.7468	36.0705	34.9144	3.15345	3.44326	3.12686	3.2301	4.62226
all_loops_974	chr10	60950000	60960000	chr10	61060000	61070000	146	35.1314	34.3436	45.3845	36.3405	4.14687	4.24172	3.21209	4.00927	6.8409	82	33.0619	32.2634	44.7157	32.4358	2.47573	2.53682	1.83195	2.52338	4.38705
all_loops_975	chr10	60950000	60960000	chr10	61110000	61120000	84	28.4395	30.8915	44.5554	34.3193	2.94679	2.71365	1.88331	2.4434	4.49971	81	27.4029	28.2232	39.0719	31.0891	2.94878	2.86338	2.07036	2.60027	4.71335
all_loops_976	chr10	61060000	61070000	chr10	61110000	61120000	180	81.6627	68.5533	73.8842	77.8251	2.20272	2.62332	2.4343	2.31119	3.35607	160	67.6537	60.281	65.4343	65.4225	2.36297	2.6515	2.44299	2.44343	3.2073
all_loops_977	chr10	61560000	61570000	chr10	61640000	61650000	105	26.8098	22.678	21.9351	23.9403	3.90564	4.61411	4.76967	4.37183	5.53817	88	23.9454	20.0136	19.2523	19.1391	3.6639	4.38013	4.55242	4.57922	4.75211
all_loops_978	chr10	61560000	61570000	chr10	61720000	61730000	42	11.8339	12.5234	15.8174	12.7338	3.52777	3.33508	2.6449	3.28039	3.17138	29	10.3419	11.1302	15.0831	12.9735	2.78686	2.59123	1.91661	2.22588	2.32788
all_loops_979	chr10	61730000	61740000	chr10	61840000	61850000	119	35.413	36.5677	54.787	39.0257	3.3537	3.24809	2.16991	3.04404	4.91111	84	32.0101	33.7757	47.8642	35.0955	2.61911	2.48261	1.75339	2.38951	3.69664
all_loops_980	chr10	61960000	61970000	chr10	62010000	62020000	215	62.2238	52.6675	61.8346	56.7179	3.45133	4.07637	3.47302	3.78578	4.87431	157	56.9368	47.1856	53.7444	52.0026	2.75436	3.32237	2.91766	3.0152	3.50423
all_loops_981	chr10	62090000	62100000	chr10	62220000	62230000	80	31.8606	30.4899	30.7877	29.4138	2.50621	2.61851	2.59326	2.71398	3.88022	86	30.0642	28.4544	29.9942	28.4316	2.85438	3.0153	2.86101	3.0177	3.86479
all_loops_982	chr10	62610000	62620000	chr10	62700000	62710000	112	50.5775	48.7883	59.6662	51.1922	2.21203	2.29298	1.87564	2.18552	3.50584	58	35.2685	32.8617	37.9688	30.2287	1.6427	1.76265	1.52618	1.91568	2.01965
all_loops_983	chr10	62610000	62620000	chr10	62770000	62780000	97	30.5373	32.2439	52.7024	26.5383	3.16934	3.00211	1.83893	3.64512	4.10681	29	16.483	21.6965	33.1003	16.9887	1.75481	1.33508	0.876497	1.70288	1.35495
all_loops_984	chr10	62770000	62780000	chr10	62840000	62850000	150	81.4724	65.9931	53.9716	95.0401	1.84008	2.27104	2.77595	1.57767	2.99039	104	59.4276	49.7748	38.8678	62.7125	1.74877	2.08723	2.67143	1.65731	2.16496
all_loops_985	chr10	63910000	63920000	chr10	66000000	66010000	20	3.80277	4.24398	4.49977	4.77786	5.15018	4.62709	4.36979	4.12066	15.0643	8	3.58565	4.54453	5.85668	3.76358	2.19771	1.74399	1.35982	2.0965	5.39309
all_loops_986	chr10	6400000	6410000	chr10	6800000	6810000	69	15.9167	13.171	18.4059	14.781	4.31424	5.20686	3.73395	4.6435	15.0237	46	14.5294	11.8269	15.5111	14.2739	3.1512	3.8652	2.95302	3.2072	9.54713
all_loops_987	chr10	6400000	6410000	chr10	7010000	7020000	33	9.77789	6.63616	8.82322	7.75911	3.35092	4.91378	3.70942	4.21167	10.2534	14	7.16712	4.86072	6.11965	4.90686	1.94025	2.84233	2.26701	2.81614	4.14584
all_loops_988	chr10	66370000	66380000	chr10	66560000	66570000	80	32.7636	31.3474	46.3855	30.0942	2.43735	2.54711	1.72312	2.65283	5.13477	73	33.1108	32.4004	46.7469	29.4928	2.20109	2.2492	1.5604	2.4702	4.76308
all_loops_989	chr10	66370000	66380000	chr10	66680000	66690000	98	30.9245	32.2951	52.5843	32.1243	3.16201	3.02823	1.86204	3.04429	7.32596	80	31.7455	30.2914	53.0417	28.1093	2.51527	2.63562	1.50729	2.83949	6.21048
all_loops_990	chr10	66770000	66780000	chr10	67190000	67200000	56	21.4034	20.491	25.2403	24.0346	2.6089	2.72449	2.21387	2.32446	8.17823	47	20.9148	18.352	22.5329	19.0672	2.24128	2.55257	2.08105	2.45732	6.57789
all_loops_991	chr10	66770000	66780000	chr10	67320000	67330000	68	21.3475	14.758	18.7834	18.0213	3.17519	4.58339	3.60634	3.75802	16.754	65	20.3002	15.3875	19.6808	19.2176	3.19115	4.20339	3.29106	3.36998	14.9792
all_loops_992	chr10	66780000	66790000	chr10	66990000	67000000	41	18.047	15.6208	18.3805	17.9708	2.26483	2.61437	2.22396	2.27438	4.25383	36	16.0562	14.0426	16.9064	15.4763	2.23444	2.55258	2.12273	2.31763	3.93282
all_loops_993	chr10	67000000	67010000	chr10	67190000	67200000	87	39.0187	36.7303	47.4585	40.1305	2.22656	2.3649	1.83143	2.16502	4.61576	61	32.8864	32.2065	39.6073	32.7178	1.85228	1.89126	1.53876	1.8618	3.41904
all_loops_994	chr10	67190000	67200000	chr10	67310000	67320000	59	29.0594	24.4918	24.874	29.4317	2.02679	2.40324	2.36647	2.00124	2.59537	37	27.8207	24.3373	22.6725	32.0122	1.32876	1.51817	1.62916	1.15532	1.72468
all_loops_995	chr10	67320000	67330000	chr10	67450000	67460000	79	22.8317	16.1837	15.6188	19.9364	3.44938	4.85763	5.03218	3.94782	6.64419	58	19.2546	15.6854	16.2881	20.5103	3.00187	3.68062	3.54527	2.81898	4.95695
all_loops_996	chr10	67460000	67470000	chr10	67600000	67610000	51	22.6046	19.3666	23.7939	19.4407	2.25065	2.62501	2.13862	2.61506	2.9885	23	16.3918	15.3421	18.8586	17.4734	1.4007	1.49591	1.21844	1.31449	1.47827
all_loops_997	chr10	6810000	6820000	chr10	7010000	7020000	51	11.1593	10.6568	11.4522	13.5036	4.53846	4.7505	4.42339	3.75636	6.50799	27	9.26854	8.95212	8.77587	9.7169	2.89266	2.99377	3.05322	2.76055	3.58827
all_loops_998	chr10	68360000	68370000	chr10	68460000	68470000	97	42.8186	41.6092	43.4083	44.6576	2.26242	2.32802	2.23176	2.16946	3.10024	57	41.3549	39.3029	39.5376	40.4861	1.3774	1.44913	1.44055	1.40689	2.00216
all_loops_999	chr10	68360000	68370000	chr10	68570000	68580000	69	26.5963	27.7442	35.0649	26.8236	2.58838	2.48166	1.96503	2.56653	4.24928	79	26.9357	27.5101	38.837	21.5113	2.92576	2.8649	2.03149	3.66012	5.2863
all_loops_1000	chr10	68360000	68370000	chr10	68640000	68650000	53	19.713	18.564	26.9444	17.0996	2.68006	2.84506	1.96344	3.08729	4.80603	59	22.2129	17.9756	29.3406	17.3584	2.64869	3.26959	2.00743	3.38518	5.6264
all_loops_1001	chr10	68360000	68370000	chr10	68780000	68790000	43	13.4431	11.6021	13.1843	14.2262	3.18243	3.68311	3.24442	3.00848	6.45554	60	13.5222	12.4238	12.9913	15.5131	4.41192	4.79887	4.59085	3.84933	8.87002
all_loops_1002	chr10	68560000	68570000	chr10	68620000	68630000	82	45.2826	40.0757	40.5936	46.7687	1.80906	2.04352	2.01752	1.7517	2.38263	69	35.6438	33.8094	36.2404	38.2524	1.9332	2.03778	1.90147	1.80171	2.35338
all_loops_1003	chr10	68640000	68650000	chr10	68780000	68790000	86	43.06	32.4128	36.1754	39.8366	1.9949	2.64819	2.37351	2.15591	3.68532	62	43.6423	32.4329	39.4261	36.2939	1.41968	1.90883	1.57111	1.70633	2.75953
all_loops_1004	chr10	68910000	68920000	chr10	69110000	69120000	95	19.052	16.4001	17.5571	21.8599	4.96554	5.7636	5.38595	4.33063	10.6074	92	21.4007	16.3679	19.3225	20.7943	4.28358	5.59269	4.74193	4.40789	10.197
all_loops_1005	chr10	68920000	68930000	chr10	69300000	69310000	40	14.0097	15.2939	18.8331	18.8725	2.84202	2.60492	2.11798	2.11359	5.16879	41	14.4041	15.4644	17.1539	18.6118	2.83368	2.64064	2.38207	2.19647	5.3769
all_loops_1006	chr10	69120000	69130000	chr10	69300000	69310000	179	40.6033	30.5489	43.4318	38.2586	4.40014	5.84361	4.11423	4.6691	9.77561	180	41.079	29.5621	37.5196	40.7275	4.37358	6.07173	4.7874	4.41124	10.6934
all_loops_1007	chr10	69120000	69130000	chr10	69430000	69440000	43	16.4651	14.5238	17.0038	17.3694	2.60186	2.94726	2.51991	2.46717	2.87268	34	18.8837	16.5693	21.455	18.5857	1.79628	2.04567	1.582	1.82493	2.31745
all_loops_1008	chr10	69330000	69340000	chr10	69420000	69430000	146	37.4361	32.5704	38.5836	42.8322	3.89226	4.47193	3.77679	3.40304	5.73048	143	38.2937	33.9649	40.0428	47.2928	3.72717	4.20081	3.56477	3.01944	5.81591
all_loops_1009	chr10	69330000	69340000	chr10	69750000	69760000	32	4.11215	4.36474	5.11158	7.29686	7.62081	7.18966	6.15936	4.33968	6.22867	40	5.05024	4.95331	6.73468	8.88708	7.78605	7.93539	5.86714	4.46196	7.91093
all_loops_1010	chr10	69780000	69790000	chr10	70020000	70030000	63	14.8254	12.4914	13.9806	14.4907	4.22769	5.01136	4.48135	4.32466	8.19135	34	11.445	9.59787	9.51392	10.1582	2.95366	3.51624	3.54694	3.32417	4.2839
all_loops_1011	chr10	69780000	69790000	chr10	70680000	70690000	30	3.52422	3.9075	5.97978	5.10727	8.30524	7.51092	4.95083	5.78038	10.7902	23	3.37277	4.64205	6.81745	5.37888	6.65174	4.87131	3.33938	4.21619	7.51961
all_loops_1012	chr10	70620000	70630000	chr10	70670000	70680000	158	80.0779	72.0305	72.3492	88.5079	1.97187	2.19186	2.18222	1.78426	2.81247	142	80.1213	76.3233	77.835	89.6341	1.77135	1.85938	1.82331	1.58357	2.7527
all_loops_1013	chr10	70780000	70790000	chr10	70860000	70870000	136	49.839	37.245	39.0881	45.8126	2.72532	3.6444	3.47299	2.96433	4.29432	115	42.9481	33.0849	39.4656	38.1176	2.67376	3.46844	2.9091	3.0117	3.83997
all_loops_1014	chr10	74400000	74410000	chr10	74610000	74620000	44	8.70823	8.4235	10.0974	13.8443	5.00668	5.17393	4.32464	3.16258	4.01874	38	7.77056	7.23039	6.54593	11.3187	4.84083	5.19754	5.73283	3.33663	3.50905
all_loops_1015	chr10	74520000	74530000	chr10	74610000	74620000	232	70.5048	59.8427	70.2556	67.1809	3.28731	3.87203	3.29895	3.44972	5.4152	262	64.2693	51.6757	65.1019	67.8289	4.07182	5.06222	4.01982	3.85845	6.80456
all_loops_1016	chr10	74740000	74750000	chr10	74900000	74910000	85	39.0737	39.3729	46.263	48.7237	2.17238	2.15591	1.83552	1.743	5.16236	72	37.4469	40.2122	44.3017	49.2166	1.92026	1.78854	1.62381	1.46198	4.49362
all_loops_1017	chr10	74770000	74780000	chr10	74900000	74910000	73	29.9055	33.4509	36.1782	38.2836	2.43622	2.17878	2.01498	1.90446	4.98942	57	29.3238	34.596	37.7683	40.2249	1.9406	1.64572	1.50786	1.416	3.79526
all_loops_1018	chr10	74900000	74910000	chr10	74950000	74960000	112	50.6087	45.9906	49.9017	49.3299	2.21067	2.43217	2.24192	2.26786	2.42711	98	47.5559	41.6542	42.9449	50.007	2.05851	2.34946	2.27902	1.95781	2.25799
all_loops_1019	chr10	75230000	75240000	chr10	75290000	75300000	231	76.2045	85.9112	87.6662	106.851	3.02865	2.68686	2.63313	2.1608	4.92716	151	61.1532	68.9569	70.3224	89.5454	2.46681	2.18805	2.14562	1.68553	3.59701
all_loops_1020	chr10	75340000	75350000	chr10	75410000	75420000	150	60.2069	56.717	59.5245	76.6971	2.48893	2.64182	2.51742	1.9545	3.58605	119	57.1424	53.5233	56.1887	64.9216	2.08063	2.22105	2.11588	1.8317	3.10328
all_loops_1021	chr10	75430000	75440000	chr10	75660000	75670000	57	25.2933	19.1259	21.8781	26.1312	2.24862	2.96995	2.59804	2.1768	5.02857	55	30.3287	23.2667	25.6858	29.3931	1.81079	2.35806	2.13684	1.86824	4.64513
all_loops_1022	chr10	75580000	75590000	chr10	75660000	75670000	114	53.5053	52.6649	54.6369	55.5681	2.12852	2.16242	2.08452	2.04965	3.30133	93	44.7317	46.0291	43.2124	56.7429	2.07666	2.01825	2.1495	1.63785	2.85414
all_loops_1023	chr10	75910000	75920000	chr10	76200000	76210000	49	16.0565	12.0584	12.0043	19.0815	3.03902	4.03838	4.0564	2.55976	6.55372	35	13.7775	11.8078	9.99186	17.3768	2.52928	2.94765	3.47805	2.00838	4.53948
all_loops_1024	chr10	75930000	75940000	chr10	76190000	76200000	51	17.0612	17.3298	17.8022	26.0218	2.97765	2.93176	2.8544	1.95622	4.78284	44	16.0595	15.6698	13.5565	26.178	2.72904	2.79649	3.22923	1.67821	4.22876
all_loops_1025	chr10	7600000	7610000	chr10	7910000	7920000	143	23.534	32.9723	45.8248	38.8161	6.05483	4.32689	3.11596	3.67714	15.0626	120	17.428	27.7262	44.1651	32.0843	6.85188	4.31607	2.7132	3.73164	13.5666
all_loops_1026	chr10	76080000	76090000	chr10	76190000	76200000	119	25.9932	29.5071	30.9678	35.6817	4.56441	4.02268	3.83355	3.32852	6.71522	80	20.5214	23.7724	25.6264	29.1083	3.88432	3.35534	3.11354	2.74237	4.95221
all_loops_1027	chr10	76290000	76300000	chr10	76480000	76490000	114	32.2551	31.8982	41.9172	35.2233	3.5265	3.56583	2.71555	3.23016	10.2801	86	30.3097	28.3497	40.5518	30.052	2.83133	3.02639	2.11799	2.85553	7.9574
all_loops_1028	chr10	76590000	76600000	chr10	76710000	76720000	222	62.0449	50.0705	49.5569	82.7242	3.57391	4.42691	4.47269	2.68158	8.00758	240	62.1208	48.7473	47.9087	79.4265	3.85884	4.91532	5.00117	3.01912	9.54305
all_loops_1029	chr10	76590000	76600000	chr10	76810000	76820000	60	18.5973	19.4679	20.7931	25.2317	3.21436	3.07136	2.87655	2.37253	3.50142	45	16.3983	18.4066	17.2607	25.6608	2.73361	2.43697	2.59782	1.75072	2.80564
all_loops_1030	chr10	76740000	76750000	chr10	76810000	76820000	114	54.0396	49.3596	53.2607	52.5342	2.10751	2.30693	2.13828	2.16779	3.21267	102	39.118	38.3437	38.979	45.1996	2.6034	2.65583	2.61266	2.25388	3.30133
all_loops_1031	chr10	76740000	76750000	chr10	76970000	76980000	66	31.6134	21.1709	25.3291	26.1039	2.0843	3.10753	2.59939	2.52253	5.47435	76	28.4652	19.163	26.0225	21.4637	2.66408	3.95057	2.9132	3.52908	6.46903
all_loops_1032	chr10	76750000	76760000	chr10	76950000	76960000	58	22.8462	21.3907	23.2345	30.4992	2.53201	2.70349	2.48988	1.89874	4.79518	42	24.9722	21.7726	23.1922	31.0737	1.67915	1.92478	1.80747	1.3505	3.31535
all_loops_1033	chr10	76810000	76820000	chr10	76970000	76980000	95	35.8071	30.7886	32.4145	40.3542	2.6485	3.0788	2.92485	2.35081	5.49593	67	36.7504	30.0412	32.5727	32.6242	1.82088	2.22619	2.0537	2.05047	3.86571
all_loops_1034	chr10	76880000	76890000	chr10	76960000	76970000	77	33.203	28.1435	30.552	33.4767	2.31511	2.72984	2.51533	2.29624	4.04252	41	27.6961	24.4422	23.7334	27.8857	1.47862	1.67467	1.72447	1.46861	2.29618
all_loops_1035	chr10	77490000	77500000	chr10	77620000	77630000	189	36.287	28.1436	36.922	41.5224	5.19691	6.69532	5.10778	4.54322	10.2819	161	32.3759	25.5856	30.4681	34.4868	4.9606	6.27199	5.27021	4.65784	8.86277
all_loops_1036	chr10	77740000	77750000	chr10	77850000	77860000	100	34.7905	33.202	35.5397	50.3984	2.86898	3.00582	2.80866	1.98224	5.35542	109	33.1898	32.445	38.7739	42.7705	3.27728	3.35229	2.80651	2.54487	5.96298
all_loops_1037	chr10	77980000	77990000	chr10	78060000	78070000	108	42.1095	45.1378	44.975	62.9609	2.56103	2.38959	2.39823	1.71422	2.97077	73	38.5409	44.1007	44.8521	56.2642	1.89178	1.65382	1.62618	1.29692	1.93894
all_loops_1038	chr10	77980000	77990000	chr10	78210000	78220000	25	6.72961	5.91248	7.08406	5.8025	3.67517	4.17465	3.49385	4.25244	2.42147	8	4.86042	4.85905	5.80753	4.3189	1.63293	1.63338	1.37113	1.83304	0.756918
all_loops_1039	chr10	78220000	78230000	chr10	78580000	78590000	71	16.927	19.6944	20.1314	26.3172	4.17573	3.59192	3.51434	2.69143	8.77752	59	12.6278	16.8952	18.1721	23.8421	4.64337	3.47746	3.23444	2.46846	6.51838
all_loops_1040	chr10	79060000	79070000	chr10	79120000	79130000	130	55.8473	52.8527	69.6566	60.6009	2.3254	2.45691	1.86506	2.1433	3.85687	122	44.3181	42.7251	53.0866	50.4178	2.74888	2.85113	2.29569	2.41697	4.17767
all_loops_1041	chr10	79450000	79460000	chr10	79570000	79580000	97	47.2969	45.0909	55.4334	56.7599	2.04866	2.14866	1.7485	1.70771	4.55935	100	49.1385	51.0784	64.0953	59.064	2.03296	1.9559	1.5593	1.69191	5.02133
all_loops_1042	chr10	79900000	79910000	chr10	79970000	79980000	212	77.5089	73.6228	90.1097	77.1167	2.73293	2.87699	2.35119	2.74682	6.67006	152	57.7366	62.0986	73.7515	60.9915	2.62982	2.44539	2.05954	2.48971	5.647
all_loops_1043	chr10	80040000	80050000	chr10	80140000	80150000	110	54.2543	46.4141	50.5073	54.2936	2.0256	2.36702	2.17557	2.02414	4.39793	94	49.0567	46.4969	50.0305	57.5314	1.91429	2.01945	1.8771	1.63279	4.06454
all_loops_1044	chr10	80100000	80110000	chr10	80150000	80160000	81	36.5985	40.131	36.429	46.7895	2.2099	2.01586	2.22015	1.7296	3.48362	71	38.0865	42.8521	37.3075	52.0307	1.86192	1.65533	1.90069	1.36388	3.03209
all_loops_1045	chr10	80200000	80210000	chr10	80340000	80350000	99	40.2742	35.0992	41.601	38.7505	2.45454	2.8154	2.37644	2.5508	4.4044	94	40.9665	39.218	45.44	44.2238	2.2914	2.39331	2.06631	2.12301	4.64709
all_loops_1046	chr10	80280000	80290000	chr10	80340000	80350000	199	95.4711	91.8726	101.24	91.9255	2.08327	2.16478	1.96468	2.16353	4.08725	136	75.9494	83.0306	87.5905	86.0241	1.78963	1.63718	1.55205	1.58028	3.20831
all_loops_1047	chr10	80340000	80350000	chr10	80450000	80460000	148	52.8341	52.6305	41.8833	94.6731	2.79782	2.80862	3.52759	1.56268	5.56687	154	51.502	53.0193	43.8744	91.5718	2.98632	2.90102	3.50431	1.681	6.48351
all_loops_1048	chr10	80390000	80400000	chr10	80450000	80460000	279	97.2739	84.3915	98.5916	113.809	2.86627	3.30329	2.828	2.45021	6.91858	228	87.4672	78.0084	97.0636	100.886	2.60486	2.9203	2.34759	2.25872	6.37167
all_loops_1049	chr10	80750000	80760000	chr10	80800000	80810000	136	67.1501	67.0748	76.3741	68.7876	2.02379	2.02606	1.77969	1.97568	3.50407	115	70.9886	69.9119	75.7768	75.3984	1.61911	1.64401	1.51693	1.52454	3.06124
all_loops_1050	chr10	80850000	80860000	chr10	80900000	80910000	170	47.3643	47.274	52.1691	51.6034	3.58375	3.59058	3.25431	3.28992	5.44462	175	50.7138	47.2565	55.9648	54.204	3.44592	3.69749	3.12317	3.22444	5.79441
all_loops_1051	chr10	80960000	80970000	chr10	81010000	81020000	92	40.254	38.235	45.9425	37.6145	2.2823	2.4025	2.00033	2.44203	3.45262	92	40.3211	39.5105	45.3643	41.7272	2.27851	2.32514	2.02576	2.20191	3.66172
all_loops_1052	chr10	80960000	80970000	chr10	81060000	81070000	69	27.15	25.4664	35.8633	29.6786	2.53578	2.70277	1.9214	2.32046	2.65352	59	33.7777	27.8144	38.8084	31.5785	1.74451	2.11719	1.51895	1.86562	2.54322
all_loops_1053	chr10	81010000	81020000	chr10	81060000	81070000	118	67.0005	52.0395	50.2191	70.9984	1.76005	2.26508	2.34702	1.66108	2.89461	100	62.3857	47.1716	40.5062	63.6308	1.60197	2.11755	2.46514	1.57067	2.78356
all_loops_1054	chr10	82070000	82080000	chr10	85270000	85280000	13	0.546791	0.568242	0.493716	0.786121	20.2538	19.6037	22.0644	14.7835	39.3332	8	0.732188	0.692398	0.857985	1.22975	9.73338	10.2221	8.45525	6.09137	17.877
all_loops_1055	chr10	82070000	82080000	chr10	86150000	86160000	18	0.548803	0.402899	0.874619	1.05446	27.8975	35.9913	18.5714	15.6783	44.7374	9	0.934904	0.691372	1.11291	0.920049	8.79309	11.499	7.50261	8.92114	17.4655
all_loops_1056	chr10	82270000	82280000	chr10	82320000	82330000	143	71.0861	69.5307	80.1585	65.3855	2.01022	2.05513	1.78299	2.18521	2.64281	113	54.5802	58.2398	66.2006	52.5695	2.06839	1.93864	1.70587	2.14735	2.3054
all_loops_1057	chr10	83970000	83980000	chr10	84080000	84090000	68	27.506	23.4336	27.6988	24.0047	2.46686	2.89373	2.44975	2.82518	2.66347	68	24.9793	22.1062	28.7468	23.7058	2.71538	3.06672	2.36075	2.86064	2.96486
all_loops_1058	chr10	84680000	84690000	chr10	85110000	85120000	56	16.3092	13.4467	19.6967	15.4357	3.41882	4.14124	2.8338	3.61104	10.1924	24	11.2479	9.42537	9.63933	9.02732	2.12374	2.53008	2.4745	2.64042	4.45764
all_loops_1059	chr10	85140000	85150000	chr10	85330000	85340000	48	20.2833	16.3269	21.4518	17.0457	2.35978	2.92812	2.23183	2.80537	3.73726	50	22.7302	19.5182	27.3329	17.6438	2.19446	2.55375	1.82628	2.82352	3.85872
all_loops_1060	chr10	85430000	85440000	chr10	85750000	85760000	32	12.1947	12.052	14.0309	14.6361	2.61088	2.64153	2.27161	2.17833	3.64773	25	12.0434	12.7031	15.8855	16.3758	2.06697	1.96047	1.57017	1.52344	2.72496
all_loops_1061	chr10	85430000	85440000	chr10	85930000	85940000	63	27.5645	20.2323	23.3054	26.9947	2.2809	3.10344	2.69595	2.32887	9.12282	49	25.686	20.3276	21.9248	26.541	1.90413	2.40361	2.2293	1.84302	6.79903
all_loops_1062	chr10	85520000	85530000	chr10	85910000	85920000	106	22.0127	25.6517	31.4527	33.7395	4.79816	4.12012	3.36263	3.13539	13.6495	107	25.3714	26.1756	33.0775	34.1499	4.20472	4.07603	3.22809	3.12702	13.4585
all_loops_1063	chr10	85530000	85540000	chr10	85750000	85760000	93	24.8681	22.0122	29.1395	26.925	3.72876	4.21035	3.18404	3.44496	8.97503	86	24.2243	22.2333	28.3621	27.5327	3.53967	3.85522	3.02508	3.11587	8.56684
all_loops_1064	chr10	85760000	85770000	chr10	85910000	85920000	133	29.7195	25.3433	32.609	31.8522	4.46352	5.23123	4.06922	4.1656	7.50699	103	28.4308	24.6136	28.6054	31.6166	3.61364	4.17179	3.59165	3.25066	6.33626
all_loops_1065	chr10	86490000	86500000	chr10	86980000	86990000	81	41.3904	32.003	41.019	26.4889	1.95467	2.52624	1.97232	3.05015	9.82593	63	34.5294	28.2055	39.3376	21.4844	1.82215	2.22925	1.59999	2.92341	7.9998
all_loops_1066	chr10	87140000	87150000	chr10	87430000	87440000	54	17.6986	21.8693	23.4335	25.9944	3.03957	2.46252	2.29885	2.07324	5.02286	19	17.134	19.8913	20.8772	22.3679	1.10827	0.955415	0.91051	0.850101	1.87095
all_loops_1067	chr10	87170000	87180000	chr10	87310000	87320000	74	36.1729	34.7246	35.9963	40.0792	2.04285	2.1278	2.05284	1.84424	3.34999	44	27.946	30.3705	33.1771	38.1568	1.57242	1.4473	1.32524	1.15274	2.18642
all_loops_1068	chr10	87310000	87320000	chr10	87760000	87770000	48	14.1813	16.0778	16.1603	19.3159	3.36805	2.97321	2.95813	2.47735	5.50014	27	9.62189	11.2133	13.023	13.256	2.78752	2.3954	2.06507	2.02905	3.38486
all_loops_1069	chr10	8770000	8780000	chr10	9390000	9400000	45	10.9506	13.8517	14.4104	17.3121	4.08124	3.23259	3.10811	2.59015	12.2438	32	10.8308	13.979	14.5105	16.5153	2.93665	2.27999	2.19705	1.93196	8.28086
all_loops_1070	chr10	87830000	87840000	chr10	88180000	88190000	43	14.8384	12.1182	14.409	17.4459	2.88518	3.52751	2.97056	2.45642	4.68469	44	11.1834	13.2989	14.3309	18.5762	3.90841	3.29133	3.05595	2.3613	5.1382
all_loops_1071	chr10	87840000	87850000	chr10	87890000	87900000	139	57.8774	54.0051	64.1551	56.0362	2.39921	2.57092	2.16481	2.4779	2.68073	125	51.975	48.2382	54.3357	58.4305	2.4023	2.58802	2.29813	2.13735	2.44414
all_loops_1072	chr10	87890000	87900000	chr10	88190000	88200000	55	22.7108	20.4699	19.3221	29.0184	2.41552	2.67867	2.83698	1.89228	5.07074	44	22.2131	23.779	24.8697	35.0191	1.97642	1.84681	1.76614	1.25573	3.71264
all_loops_1073	chr10	88790000	88800000	chr10	89090000	89100000	60	12.447	12.7503	17.1622	15.0969	4.79001	4.67695	3.48159	3.95476	5.45496	89	14.7618	15.4301	23.4636	17.4621	5.99524	5.73726	3.78126	5.07343	8.27264
all_loops_1074	chr10	8890000	8900000	chr10	9390000	9400000	54	14.1026	16.5928	16.5847	19.6798	3.80916	3.24092	3.2425	2.73511	10.8372	44	14.2975	16.4209	18.5923	19.5982	3.06303	2.66935	2.35927	2.23879	8.6369
all_loops_1075	chr10	88920000	88930000	chr10	88990000	89000000	152	74.254	66.0888	83.6566	71.6031	2.04562	2.29797	1.81598	2.12125	2.66307	133	79.2773	67.3353	77.5613	74.943	1.6768	1.97374	1.71385	1.77365	2.7514
all_loops_1076	chr10	88920000	88930000	chr10	89090000	89100000	129	37.1664	34.448	37.704	54.0409	3.46425	3.73683	3.41498	2.38452	6.11861	126	34.6069	34.3122	36.8613	51.8622	3.63329	3.6644	3.41168	2.42676	6.83897
all_loops_1077	chr10	89540000	89550000	chr10	90150000	90160000	64	12.0838	11.4874	12.3253	16.5291	5.2611	5.53189	5.15881	3.85469	17.3381	54	13.6079	11.3295	14.2637	15.0688	3.94664	4.73336	3.76644	3.56654	12.8866
all_loops_1078	chr10	89610000	89620000	chr10	90150000	90160000	60	14.9292	13.2591	13.823	17.0945	3.99889	4.49882	4.31659	3.49531	14.3304	47	11.9628	12.1298	11.1713	18.2939	3.90456	3.85126	4.17877	2.56062	9.99479
all_loops_1079	chr10	90190000	90200000	chr10	90490000	90500000	66	12.0454	8.91056	14.8063	9.92813	5.4424	7.33584	4.43437	6.59146	9.43482	28	7.22027	5.56243	10.3582	5.61036	3.83865	4.96253	2.68688	4.92088	4.09229
all_loops_1080	chr10	90530000	90540000	chr10	90600000	90610000	120	48.4131	43.6206	49.1087	49.8945	2.47562	2.74699	2.44063	2.40226	3.0275	102	40.7236	41.3627	49.1107	53.6304	2.501	2.46245	2.07475	1.90023	2.59158
all_loops_1081	chr10	90650000	90660000	chr10	90700000	90710000	104	49.9229	47.0156	44.8277	56.5032	2.08105	2.20946	2.31706	1.83912	2.14221	91	39.4149	38.4001	36.7208	46.6094	2.30546	2.36623	2.47415	1.95036	1.98804
all_loops_1082	chr10	90750000	90760000	chr10	92110000	92120000	31	9.47535	8.23861	10.222	9.7588	3.24792	3.72964	3.01299	3.15454	21.6919	21	6.16024	7.23105	8.32344	8.76038	3.37048	2.87817	2.50491	2.38139	12.4892
all_loops_1083	chr10	90750000	90760000	chr10	92470000	92480000	27	6.92962	5.73504	5.60851	8.72295	3.85511	4.64436	4.7473	3.07153	36.4989	14	6.02933	5.39804	5.06878	7.85546	2.30042	2.56455	2.72792	1.77237	16.1854
all_loops_1084	chr10	92510000	92520000	chr10	92750000	92760000	64	24.4786	15.9401	22.6753	16.6944	2.60796	3.99624	2.81445	3.81676	6.48425	48	25.0637	15.7818	21.8695	17.6286	1.91149	3.02862	2.1894	2.71312	4.7891
all_loops_1085	chr10	92510000	92520000	chr10	92930000	92940000	34	11.3596	7.38516	14.5238	6.8583	2.97567	4.55568	2.33181	4.90062	7.2931	38	13.604	9.01562	14.535	8.91479	2.78021	4.17964	2.60335	4.22639	7.89676
all_loops_1086	chr10	92530000	92540000	chr10	92740000	92750000	82	25.0454	22.1323	34.0219	22.8917	3.26501	3.69283	2.40608	3.57085	6.38608	56	24.0405	22.7028	34.7653	22.7	2.32389	2.46022	1.60905	2.46053	4.25627
all_loops_1087	chr10	92750000	92760000	chr10	92820000	92830000	92	47.5438	43.7036	41.577	44.383	1.9331	2.10257	2.20985	2.07046	2.65929	58	38.0574	36.2021	34.3029	44.081	1.52264	1.60046	1.68881	1.31505	1.76322
all_loops_1088	chr10	92750000	92760000	chr10	92880000	92890000	80	32.2738	27.7937	40.9072	28.1554	2.47422	2.87162	1.95332	2.83485	3.77291	77	27.9138	27.6934	39.2041	27.3959	2.75222	2.77404	1.96163	2.80405	3.74567
all_loops_1089	chr10	92750000	92760000	chr10	92930000	92940000	66	22.2166	19.6684	28.0756	19.72	2.96192	3.34373	2.346	3.33501	4.11061	79	23.072	21.9856	31.1718	24.4869	3.4136	3.58152	2.52944	3.21717	5.0026
all_loops_1090	chr10	92750000	92760000	chr10	93040000	93050000	39	15.8451	14.2719	13.8823	14.8307	2.45216	2.72058	2.79639	2.61877	2.92901	31	18.9651	15.2428	18.4469	16.8589	1.63125	2.02701	1.67683	1.83384	2.23261
all_loops_1091	chr10	92880000	92890000	chr10	92930000	92940000	110	45.7559	38.7269	42.8042	38.7518	2.401	2.83567	2.56618	2.83385	2.8583	91	39.0389	33.2432	31.5139	37.0693	2.32761	2.73219	2.88165	2.45095	2.54543
all_loops_1092	chr10	9290000	9300000	chr10	9390000	9400000	90	33.2216	29.5088	33.0709	33.9753	2.70396	3.04302	2.71623	2.64414	3.42442	55	27.1679	26.2694	27.9435	26.6698	2.02069	2.08954	1.9648	2.05829	2.19455
all_loops_1093	chr10	9290000	9300000	chr10	9470000	9480000	36	10.8316	10.939	12.3663	14.0517	3.30235	3.27022	2.8958	2.55094	2.25904	11	10.1108	9.96469	10.0848	11.3444	1.08709	1.10287	1.08986	0.969907	0.729583
all_loops_1094	chr10	92940000	92950000	chr10	93010000	93020000	62	27.8301	30.2974	36.2545	34.1575	2.22341	2.04294	1.70818	1.81274	2.57564	42	22.2155	25.2723	28.7242	28.4626	1.88658	1.65929	1.46058	1.47395	1.76296
all_loops_1095	chr10	93500000	93510000	chr10	93570000	93580000	133	51.5972	54.7782	59.2721	76.2149	2.57461	2.42537	2.24179	1.74409	3.89014	117	46.7634	51.5481	58.2622	62.9541	2.49875	2.26727	2.00643	1.85713	3.47197
all_loops_1096	chr10	93860000	93870000	chr10	94070000	94080000	43	16.6037	13.4556	18.0911	14.2749	2.58026	3.17949	2.36929	2.99828	5.15713	31	13.8124	12.7468	16.499	14.1101	2.23542	2.42083	1.8736	2.18859	3.84685
all_loops_1097	chr10	93870000	93880000	chr10	93970000	93980000	66	26.8073	26.4143	33.9817	28.5091	2.45658	2.49299	1.93946	2.31046	3.09804	58	26.0695	25.0551	33.4593	27.9147	2.22014	2.30967	1.73126	2.07391	2.82257
all_loops_1098	chr10	94080000	94090000	chr10	94420000	94430000	114	30.1025	20.7378	25.6262	25.8068	3.77783	5.47562	4.43517	4.40424	11.9438	65	22.2272	18.2684	23.1283	23.2816	2.91573	3.54414	2.80261	2.78424	6.7093
all_loops_1099	chr10	94450000	94460000	chr10	94880000	94890000	52	9.25579	13.2593	24.1491	10.9965	5.56874	3.89992	2.14853	4.69519	11.5532	50	10.4611	11.5213	19.9511	10.8396	4.7438	4.31106	2.49862	4.57971	11.6536
all_loops_1100	chr10	94450000	94460000	chr10	94930000	94940000	84	18.094	12.4219	19.7074	15.4255	4.6224	6.71625	4.24588	5.41689	19.1471	69	15.1574	10.0858	17.3101	10.7306	4.52894	6.78396	3.96896	6.38005	16.8548
all_loops_1101	chr10	94560000	94570000	chr10	94880000	94890000	143	37.9104	42.869	61.3735	48.1676	3.76476	3.33031	2.32783	2.96472	10.2061	77	34.2169	36.8055	44.9071	40.7547	2.24671	2.08912	1.71306	1.88717	5.97942
all_loops_1102	chr10	94560000	94570000	chr10	94930000	94940000	126	42.0348	36.1165	51.4641	42.792	2.99278	3.48183	2.4455	2.93994	9.55659	84	36.0037	30.5661	41.7973	32.7538	2.3294	2.74244	2.00729	2.55982	7.04228
all_loops_1103	chr10	94780000	94790000	chr10	94870000	94880000	88	40.4237	38.2977	41.1412	43.0896	2.17404	2.29441	2.13621	2.03984	3.29243	57	29.3232	30.0479	30.9024	33.3314	1.94065	1.894	1.84179	1.70798	2.37171
all_loops_1104	chr10	94880000	94890000	chr10	94930000	94940000	151	74.9947	59.7207	67.8282	65.3524	2.01213	2.52588	2.22441	2.30855	2.27048	112	55.3651	45.9122	49.9737	54.5714	2.02109	2.43631	2.2387	2.05043	1.97272
all_loops_1105	chr10	94950000	94960000	chr10	95350000	95360000	86	45.4063	27.8429	25.5672	40.2504	1.89205	3.08128	3.35447	2.13381	8.29043	55	37.4241	25.0542	22.3959	36.133	1.46839	2.19049	2.44933	1.52072	5.21296
all_loops_1106	chr10	95010000	95020000	chr10	95310000	95320000	154	36.4746	41.3714	68.2959	40.7067	4.21331	3.71582	2.25306	3.77634	12.2584	98	37.6831	37.6657	61.327	37.0426	2.5964	2.59759	1.59702	2.64117	8.21135
all_loops_1107	chr10	95010000	95020000	chr10	95350000	95360000	202	56.9323	46.0257	81.6812	49.9066	3.5436	4.38151	2.47123	4.04146	14.7081	202	51.3912	41.3935	67.5619	46.2407	3.92495	4.87065	2.98691	4.36117	15.5028
all_loops_1108	chr10	95010000	95020000	chr10	95480000	95490000	61	15.6713	20.0374	25.3972	24.2609	3.87412	3.03416	2.39634	2.50812	6.69342	40	16.4234	19.6037	23.7596	23.6037	2.42687	2.03515	1.68066	1.69172	4.31015
all_loops_1109	chr10	95360000	95370000	chr10	95490000	95500000	184	54.2064	42.6682	56.58	46.3197	3.39002	4.3046	3.24806	3.96599	6.70696	150	46.3785	37.0699	43.2403	46.1106	3.22945	4.03822	3.46329	3.24818	5.61456
all_loops_1110	chr10	95590000	95600000	chr10	96800000	96810000	98	33.2386	24.2476	31.5058	33.1104	2.94253	4.02915	3.10386	2.95389	30.3517	45	27.5835	20.7207	23.1132	27.7794	1.62913	2.16611	1.94286	1.61768	13.3782
all_loops_1111	chr10	95670000	95680000	chr10	96070000	96080000	77	28.3019	23.3295	27.4694	25.1039	2.71461	3.29073	2.79658	3.05905	8.17261	61	27.2765	22.4065	31.8746	23.3713	2.23184	2.71477	1.91089	2.60317	6.07483
all_loops_1112	chr10	95670000	95680000	chr10	96770000	96780000	87	19.4135	24.0503	29.9811	25.2017	4.46357	3.60658	2.89551	3.44246	29.822	128	19.5423	23.356	28.0248	25.2546	6.52164	5.46128	4.5547	5.05234	40.3267
all_loops_1113	chr10	95670000	95680000	chr10	96800000	96810000	102	37.5143	30.437	45.3479	37.3367	2.71439	3.34349	2.24653	2.72727	26.906	96	37.4798	28.6867	42.9709	34.5031	2.55723	3.33835	2.2312	2.77721	23.5214
all_loops_1114	chr10	96080000	96090000	chr10	96380000	96390000	55	27.7963	25.0952	30.8774	29.179	1.97517	2.18692	1.77872	1.8819	3.64569	41	25.9238	24.4461	28.2502	27.4148	1.57932	1.6744	1.44973	1.49374	2.97474
all_loops_1115	chr10	96080000	96090000	chr10	96770000	96780000	100	19.5423	20.2035	21.1811	28.6673	5.09614	4.9302	4.70371	3.47965	17.8695	86	17.0189	18.6291	15.4943	28.6402	5.02953	4.59713	5.52124	2.9958	15.7213
all_loops_1116	chr10	96150000	96160000	chr10	96770000	96780000	57	18.213	17.1323	13.6945	26.7375	3.11801	3.31355	4.13935	2.12762	9.77377	44	17.4634	15.8498	13.0476	28.2679	2.51091	2.76493	3.35424	1.55457	7.294
all_loops_1117	chr10	96830000	96840000	chr10	97130000	97140000	115	27.186	24.4334	34.7307	30.1902	4.21828	4.69157	3.30455	3.79991	11.8611	72	21.4698	19.5433	29.4632	21.8469	3.34264	3.67046	2.43885	3.28521	7.6082
all_loops_1118	chr10	98620000	98630000	chr10	99080000	99090000	52	24.3343	15.4594	23.112	15.8147	2.13225	3.34846	2.24453	3.2737	10.161	37	21.3702	14.1414	21.3588	15.6522	1.72798	2.60508	1.72889	2.35522	7.37153
all_loops_1119	chr10	98630000	98640000	chr10	99030000	99040000	63	13.1353	16.6729	25.7755	19.1248	4.76755	3.76203	2.4386	3.28222	13.1073	48	12.3708	15.8745	22.4178	15.4909	3.85702	3.01104	2.13609	3.08513	9.79857
all_loops_1120	chr10	98660000	98670000	chr10	98720000	98730000	194	83.807	77.1367	87.2076	98.6446	2.31327	2.51306	2.22317	1.96568	3.56425	172	72.7899	70.2271	75.5884	89.2365	2.3611	2.44714	2.2738	1.92643	3.1954
all_loops_1121	chr10	98660000	98670000	chr10	98920000	98930000	50	11.4274	19.2227	18.4542	23.0607	4.34616	2.5928	2.70019	2.16315	4.73461	22	12.3491	17.8556	17.9546	21.1072	1.77523	1.23081	1.22407	1.0421	2.04674
all_loops_1122	chr10	98730000	98740000	chr10	99030000	99040000	37	13.6402	12.4446	13.6508	14.6883	2.7001	2.95745	2.69802	2.50874	7.05149	35	12.86	11.4997	12.7082	14.5537	2.70833	3.02595	2.74044	2.39529	6.54266
all_loops_1123	chr10	99100000	99110000	chr10	99630000	99640000	42	9.11571	9.00404	14.3985	11.3646	4.56829	4.62432	2.90375	3.67216	12.2696	45	8.34272	9.23007	12.9735	10.5136	5.34188	4.83383	3.44974	4.24927	13.6423
all_loops_1124	chr10	99100000	99110000	chr10	99930000	99940000	21	5.0374	3.05472	4.78739	3.83292	4.10714	6.6884	4.31724	5.36497	17.2002	14	4.95437	3.32588	3.87918	3.80197	2.78966	4.11573	3.54344	3.61356	10.5158
all_loops_1125	chr10	99480000	99490000	chr10	99610000	99620000	61	25.883	27.7901	27.1113	33.2981	2.35153	2.19074	2.24539	1.82944	2.81629	69	25.8217	26.6399	28.8607	31.5767	2.66572	2.58415	2.38599	2.18142	3.41774
all_loops_1126	chr11	100030000	100040000	chr11	100150000	100160000	137	42.324	30.9403	32.0261	38.9078	3.23167	4.41683	4.26755	3.51468	5.73891	139	38.0548	28.0031	26.0288	36.5952	3.64567	4.94963	5.32364	3.79069	6.00186
all_loops_1127	chr11	100220000	100230000	chr11	100330000	100340000	101	42.2082	41.2128	57.0042	45.5254	2.38961	2.44718	1.77045	2.21587	3.69393	101	38.734	40.3299	59.7366	44.5379	2.60339	2.50062	1.6896	2.26489	3.98348
all_loops_1128	chr11	100430000	100440000	chr11	100550000	100560000	193	45.0256	45.5395	57.4792	66.199	4.27916	4.23098	3.35364	2.91256	6.96752	172	41.3177	47.2891	52.1824	63.7009	4.15523	3.63163	3.29174	2.69745	6.36111
all_loops_1129	chr11	100500000	100510000	chr11	100550000	100560000	136	64.4197	60.5956	66.3117	66.5786	2.10943	2.24234	2.04934	2.04113	3.60311	100	53.9373	54.6068	59.0481	56.9323	1.85243	1.82975	1.69236	1.75515	2.81668
all_loops_1130	chr11	100740000	100750000	chr11	100890000	100900000	58	23.1623	26.4421	30.8755	28.1616	2.4976	2.18897	1.87567	2.05579	3.1184	38	31.4275	33.9683	42.1279	34.814	1.20847	1.11834	0.902246	1.09125	1.91069
all_loops_1131	chr11	100750000	100760000	chr11	100810000	100820000	216	66.1248	61.2234	64.7247	67.4438	3.26313	3.52394	3.3336	3.19941	6.13624	200	61.3595	59.6306	67.9698	67.2771	3.2558	3.35004	2.93963	2.96985	5.70344
all_loops_1132	chr11	100760000	100770000	chr11	100920000	100930000	78	35.2948	34.3042	36.776	44.1923	2.20654	2.27007	2.11791	1.76329	3.06381	85	40.8117	39.8511	42.4652	54.8691	2.08009	2.13011	1.99929	1.54814	3.42454
all_loops_1133	chr11	100840000	100850000	chr11	100920000	100930000	220	85.608	69.5197	82.3573	92.9207	2.56802	3.16146	2.66926	2.36614	5.21015	205	79.0639	72.2835	81.4572	94.3936	2.59083	2.83352	2.5148	2.17052	5.14887
all_loops_1134	chr11	100940000	100950000	chr11	101040000	101050000	149	82.4823	64.766	61.1093	95.5515	1.80547	2.29858	2.4359	1.55878	4.48098	140	80.5694	62.159	62.024	86.9063	1.73672	2.25028	2.25517	1.61023	4.60498
all_loops_1135	chr11	101070000	101080000	chr11	101160000	101170000	158	51.5978	48.7442	58.3852	71.5828	3.05816	3.23682	2.70325	2.20555	4.92349	195	54.0783	52.9042	67.0212	71.6097	3.60107	3.68084	2.90668	2.72069	6.24743
all_loops_1136	chr11	101110000	101120000	chr11	101160000	101170000	219	111.706	102.027	100.368	117.887	1.95964	2.14538	2.1808	1.85699	3.50195	179	117.262	109.846	109.877	119.006	1.52605	1.62898	1.62852	1.5037	2.9775
all_loops_1137	chr11	101180000	101190000	chr11	101250000	101260000	255	77.1836	80.3291	95.8548	106.772	3.30083	3.17174	2.65854	2.38696	6.51699	201	59.6348	63.7694	70.9971	79.2975	3.36655	3.14861	2.82852	2.53282	5.91073
all_loops_1138	chr11	101520000	101530000	chr11	101590000	101600000	481	153.379	119.963	149.434	134.805	3.13464	4.00708	3.21733	3.5662	7.13336	458	150.9	118.806	154.976	133.904	3.03377	3.85262	2.95404	3.41856	7.2066
all_loops_1139	chr11	101620000	101630000	chr11	101670000	101680000	162	87.2	76.8166	87.3962	78.8169	1.85682	2.10748	1.85265	2.05406	2.89446	117	76.1668	65.8855	79.8051	62.0993	1.5354	1.77463	1.46549	1.88266	2.2773
all_loops_1140	chr11	101620000	101630000	chr11	101770000	101780000	100	47.4952	40.2578	39.3057	60.0522	2.10315	2.48031	2.54024	1.66411	5.24257	88	49.0063	41.9289	33.0551	65.5585	1.79407	2.09618	2.65721	1.34179	4.62716
all_loops_1141	chr11	101670000	101680000	chr11	101770000	101780000	199	61.8268	58.507	68.8067	64.3808	3.21509	3.39721	2.88941	3.08774	7.57852	183	58.1701	55.7483	68.0807	67.0933	3.14226	3.27853	2.68551	2.72497	7.28103
all_loops_1142	chr11	101780000	101790000	chr11	101830000	101840000	197	69.4683	57.9337	66.3132	62.914	2.83319	3.3963	2.96778	3.12788	4.56148	192	53.057	49.8235	55.2114	49.604	3.61383	3.84788	3.47306	3.86488	4.74284
all_loops_1143	chr11	101850000	101860000	chr11	101900000	101910000	211	78.7974	67.5473	84.3852	80.3005	2.67563	3.1206	2.49866	2.6256	3.96035	197	74.9208	65.2956	76.8938	69.8398	2.62727	3.01396	2.55995	2.81814	3.96456
all_loops_1144	chr11	101920000	101930000	chr11	102000000	102010000	159	68.5171	66.3013	74.279	88.8858	2.31866	2.39604	2.13905	1.78793	3.83612	147	58.7226	57.6063	66.6972	80.2967	2.50074	2.54912	2.20219	1.82968	3.87344
all_loops_1145	chr11	102160000	102170000	chr11	102270000	102280000	281	79.2147	67.4349	81.6117	71.4164	3.54411	4.16229	3.44014	3.93057	9.22204	236	63.4789	58.474	66.338	71.7096	3.7135	4.0308	3.55369	3.28786	8.40108
all_loops_1146	chr11	102340000	102350000	chr11	102420000	102430000	138	71.4371	64.1951	67.8369	67.4829	1.93047	2.14791	2.03277	2.04342	3.71432	120	70.3893	59.3224	73.1014	61.6547	1.7038	2.02112	1.64068	1.94479	3.55182
all_loops_1147	chr11	102350000	102360000	chr11	102510000	102520000	95	24.6883	30.2167	36.3011	39.0863	3.83649	3.13688	2.61256	2.42687	4.82577	92	25.8868	31.1331	35.7704	40.4007	3.54411	2.9488	2.56758	2.27404	4.93898
all_loops_1148	chr11	102430000	102440000	chr11	102510000	102520000	234	64.063	57.1413	70.903	67.8878	3.64852	4.0897	3.29704	3.44327	7.56597	226	58.3151	54.1833	59.9291	69.5452	3.87057	4.16519	3.76651	3.24646	7.8495
all_loops_1149	chr11	102600000	102610000	chr11	102710000	102720000	92	43.427	41.0588	37.1535	59.9641	2.11593	2.23767	2.47225	1.53336	4.15929	128	41.3493	40.5464	43.5637	53.762	3.09052	3.15157	2.93378	2.3783	5.49765
all_loops_1150	chr11	102630000	102640000	chr11	102710000	102720000	104	41.3866	42.0237	43.4868	53.9964	2.50925	2.47129	2.38834	1.92434	4.911	65	30.8293	36.1716	33.3424	53.5161	2.1048	1.79479	1.94663	1.21419	3.24762
all_loops_1151	chr11	102760000	102770000	chr11	102850000	102860000	207	53.4023	53.0749	67.3262	67.0997	3.87086	3.8947	3.07151	3.08186	7.18465	180	43.6048	44.8774	54.9232	53.8533	4.12083	4.00424	3.27316	3.33807	7.01213
all_loops_1152	chr11	102760000	102770000	chr11	102910000	102920000	85	37.1631	28.7582	47.2781	24.4487	2.28376	2.9489	1.79619	3.46657	4.928	71	35.4227	28.4099	46.4232	26.7982	2.00154	2.49387	1.52827	2.6433	3.96707
all_loops_1153	chr11	102960000	102970000	chr11	103020000	103030000	224	123.732	97.5188	87.3664	109.395	1.80972	2.29566	2.56213	2.04666	3.49541	183	108.816	87.304	81.9166	94.1902	1.68111	2.09487	2.23247	1.94188	3.3192
all_loops_1154	chr11	103020000	103030000	chr11	103190000	103200000	148	60.7603	45.1275	47.937	64.7208	2.43344	3.27456	3.08304	2.28476	6.43305	118	59.4753	45.7274	47.0348	60.3423	1.98236	2.57706	2.50558	1.95393	5.6742
all_loops_1155	chr11	103190000	103200000	chr11	103410000	103420000	48	10.9801	9.08019	7.8693	14.3712	4.34112	5.23954	6.03567	3.32383	3.67598	21	7.05777	6.41344	4.97105	9.19204	2.94785	3.23946	4.16088	2.27076	1.67088
all_loops_1156	chr11	103210000	103220000	chr11	103260000	103270000	139	72.4509	53.2084	62.5435	63.1129	1.91727	2.60934	2.2205	2.2005	3.07326	117	73.8534	53.9105	64.4089	64.448	1.58343	2.1681	1.81525	1.81415	2.78285
all_loops_1157	chr11	103500000	103510000	chr11	103620000	103630000	53	16.2377	15.6183	18.5218	18.8138	3.25014	3.37823	2.8515	2.80748	4.40959	25	13.3758	12.6489	16.1418	12.8198	1.8626	1.96879	1.54539	1.94276	2.17461
all_loops_1158	chr11	103620000	103630000	chr11	103770000	103780000	97	24.9109	22.3943	25.8532	26.0219	3.88231	4.31664	3.74135	3.71719	5.54206	86	22.3653	18.9825	22.4951	22.513	3.83259	4.51198	3.81056	3.80754	5.11837
all_loops_1159	chr11	103850000	103860000	chr11	104020000	104030000	72	24.8675	22.6937	33.5801	23.1732	2.88775	3.16315	2.14073	3.09799	6.21194	51	21.176	19.1127	25.9924	21.6846	2.40177	2.6597	1.95843	2.3457	4.06616
all_loops_1160	chr11	103850000	103860000	chr11	104050000	104060000	72	27.1496	21.4402	31.7857	20.2843	2.64592	3.34723	2.2612	3.53704	6.72267	43	23.7153	18.1807	24.6111	17.39	1.80976	2.35768	1.74416	2.46426	3.80309
all_loops_1161	chr11	104180000	104190000	chr11	104310000	104320000	152	66.7555	57.9854	62.0284	73.8922	2.27506	2.61856	2.44815	2.05562	5.47553	143	80.2838	65.5859	73.6944	79.6235	1.78021	2.17855	1.93917	1.79495	5.00777
all_loops_1162	chr11	104450000	104460000	chr11	104980000	104990000	38	14.3557	16.0556	17.1978	19.3375	2.63563	2.35831	2.20259	1.96013	5.69698	51	16.7848	20.2655	22.1397	25.7403	3.02639	2.50915	2.29769	1.97753	6.94917
all_loops_1163	chr11	104630000	104640000	chr11	104980000	104990000	84	22.7892	19.3359	24.685	20.2617	3.67422	4.32704	3.39318	4.1303	9.02813	66	25.0308	22.5851	29.2723	22.3787	2.63024	2.91381	2.25042	2.94057	6.57977
all_loops_1164	chr11	104780000	104790000	chr11	104970000	104980000	50	20.41	18.8363	20.3316	24.5756	2.44272	2.64571	2.45209	2.03034	4.11061	25	22.4739	20.5436	21.6294	26.3176	1.1119	1.21587	1.15512	0.950125	1.98102
all_loops_1165	chr11	105200000	105210000	chr11	105450000	105460000	141	33.0312	30.3802	35.2605	33.8787	4.25883	4.62923	3.99033	4.1526	11.2892	85	21.9022	21.1194	25.9102	24.0534	3.86779	4.01049	3.2718	3.52331	7.27258
all_loops_1166	chr11	105200000	105210000	chr11	105710000	105720000	35	8.86717	10.8818	14.8861	10.808	3.91428	3.19619	2.34217	3.21781	10.6553	23	7.22448	9.38319	12.6979	11.2601	3.15381	2.43589	1.80499	2.03344	6.42268
all_loops_1167	chr11	105200000	105210000	chr11	105770000	105780000	71	23.4338	19.4123	27.8277	20.5387	3.02118	3.64386	2.54586	3.44499	12.6403	67	17.6686	16.1966	20.3106	17.8768	3.77632	4.11743	3.2875	3.73259	11.5814
all_loops_1168	chr11	105450000	105460000	chr11	105770000	105780000	59	27.4563	19.1261	24.7611	21.6439	2.1447	3.07394	2.3772	2.718	5.06163	44	24.9959	18.8067	21.2209	21.9199	1.75726	2.33251	2.06839	2.00273	3.7915
all_loops_1169	chr11	105540000	105550000	chr11	105770000	105780000	97	30.6693	25.2181	35.7024	29.1631	3.15575	3.83521	2.7121	3.31817	6.70138	94	34.1588	26.961	33.8065	26.8332	2.74674	3.47733	2.77528	3.49383	6.13229
all_loops_1170	chr11	105790000	105800000	chr11	105880000	105890000	81	34.7925	33.0749	48.55	33.0515	2.32428	2.44462	1.66701	2.44635	3.34588	65	27.9671	27.5094	36.9893	32.0913	2.31944	2.3579	1.75522	2.02228	2.95009
all_loops_1171	chr11	106270000	106280000	chr11	106480000	106490000	72	21.9527	21.43	26.2043	27.7728	3.26944	3.34881	2.741	2.58675	3.83933	64	19.797	23.6282	26.3308	31.5455	3.22159	2.70143	2.4252	2.02557	3.7461
all_loops_1172	chr11	106280000	106290000	chr11	106350000	106360000	207	81.7349	70.1974	73.6568	76.7211	2.5307	2.94605	2.80788	2.69588	4.8804	218	73.9817	64.8799	72.6336	72.5672	2.94405	3.35642	2.99861	3.00136	5.46787
all_loops_1173	chr11	106390000	106400000	chr11	106480000	106490000	161	65.5731	63.8677	67.8144	91.4373	2.45306	2.51846	2.37211	1.75994	4.56267	140	62.1214	60.8446	64.332	81.7578	2.25164	2.29881	2.17439	1.71151	4.27779
all_loops_1174	chr11	106500000	106510000	chr11	106600000	106610000	196	62.3959	52.9502	56.5463	79.4648	3.13781	3.6965	3.46183	2.46466	6.95432	184	63.5176	55.0721	64.0909	80.4363	2.89385	3.33683	2.86801	2.28592	6.48843
all_loops_1175	chr11	106700000	106710000	chr11	106830000	106840000	139	61.0548	65.2893	70.6655	90.2233	2.27455	2.12726	1.96565	1.54002	4.59331	131	61.7414	67.0789	75.7778	81.4606	2.11994	1.9515	1.72778	1.60739	4.46043
all_loops_1176	chr11	106770000	106780000	chr11	106830000	106840000	207	96.5217	98.2864	100.125	115.449	2.14341	2.10497	2.06636	1.79231	3.67391	161	79.6235	84.7628	85.6771	94.3934	2.02073	1.89836	1.87812	1.70488	3.158
all_loops_1177	chr11	107070000	107080000	chr11	107330000	107340000	237	56.0831	48.544	54.5562	72.612	4.22013	4.87419	4.33803	3.26081	10.8184	250	63.2208	47.2573	54.9163	64.436	3.94973	5.28113	4.54593	3.87535	11.7368
all_loops_1178	chr11	107130000	107140000	chr11	107330000	107340000	134	49.3901	44.7793	43.8259	63.1489	2.70963	2.98801	3.05287	2.1202	6.06562	159	54.0368	46.3376	45.2541	64.8954	2.93885	3.4261	3.50795	2.44787	7.49324
all_loops_1179	chr11	107240000	107250000	chr11	107330000	107340000	146	74.1171	60.7133	60.5817	70.5491	1.96855	2.40244	2.40764	2.06797	3.55732	109	62.7394	51.7407	52.9459	57.7248	1.73617	2.10452	2.05671	1.88673	2.96036
all_loops_1180	chr11	107380000	107390000	chr11	107700000	107710000	21	5.29505	5.22892	6.93589	5.60187	3.91099	3.95953	2.99891	3.70054	2.44227	11	5.70441	4.9975	8.31006	5.60353	1.91234	2.17754	1.31985	1.94616	1.22059
all_loops_1181	chr11	107720000	107730000	chr11	107850000	107860000	82	21.463	17.7424	20.9915	17.5908	3.80745	4.60141	3.89256	4.64084	4.75738	60	16.9745	14.8616	19.5084	15.5265	3.51986	4.01696	3.06501	3.84603	3.56983
all_loops_1182	chr11	107720000	107730000	chr11	108270000	108280000	46	7.74627	7.55848	11.0252	10.02	5.8754	6.01947	4.14376	4.55536	12.1126	25	8.91313	8.36994	11.1286	11.257	2.78483	2.96342	2.23537	2.21009	6.11608
all_loops_1183	chr11	107880000	107890000	chr11	108230000	108240000	135	39.2659	44.8906	69.4816	40.2465	3.43191	3.00285	1.9416	3.3485	11.0044	120	46.596	49.3482	68.3711	52.4181	2.57196	2.4288	1.75402	2.28683	9.42646
all_loops_1184	chr11	107980000	107990000	chr11	108230000	108240000	106	49.7642	51.4833	59.1678	56.8658	2.12778	2.05687	1.79018	1.86252	5.02963	76	55.4083	56.7605	58.1667	65.5976	1.37097	1.33836	1.30606	1.15834	3.3421
all_loops_1185	chr11	108310000	108320000	chr11	108780000	108790000	58	22.1899	18.8367	28.8101	20.5598	2.60656	3.06812	2.00968	2.81223	8.45462	30	16.9493	14.7696	17.9901	16.472	1.76547	2.02426	1.66389	1.81631	4.56587
all_loops_1186	chr11	108310000	108320000	chr11	108980000	108990000	46	16.0293	15.8394	23.3948	12.3144	2.85815	2.8922	1.96213	3.71344	12.0834	25	14.4135	11.6953	17.9192	10.3263	1.72942	2.12797	1.39296	2.40737	6.35582
all_loops_1187	chr11	108310000	108320000	chr11	109050000	109060000	59	16.647	14.4072	20.8596	15.5309	3.529	4.07383	2.8197	3.78096	18.6029	40	13.5016	11.2052	18.7913	11.1069	2.94818	3.54703	2.12267	3.57815	12.4057
all_loops_1188	chr11	109100000	109110000	chr11	109280000	109290000	51	15.5442	11.9563	15.0578	14.5412	3.26638	4.23846	3.3712	3.49014	3.86051	33	12.7531	10.3823	14.6059	12.7272	2.57524	3.15771	2.2508	2.58046	2.65236
all_loops_1189	chr11	109100000	109110000	chr11	109440000	109450000	32	8.00684	7.09687	10.5646	7.79041	3.95962	4.46028	3.00995	4.06823	4.32672	16	6.00782	6.27212	9.87798	6.90522	2.63596	2.52663	1.61355	2.29829	2.20853
all_loops_1190	chr11	109190000	109200000	chr11	109280000	109290000	138	38.8751	36.94	45.7084	49.4674	3.54329	3.7284	3.01473	2.7861	4.97872	117	36.2547	33.6253	43.1487	41.1095	3.22104	3.47217	2.7076	2.84158	4.34844
all_loops_1191	chr11	109300000	109310000	chr11	109440000	109450000	238	57.6094	40.6586	51.2409	47.7718	4.12584	5.84171	4.63763	4.9737	10.7628	177	48.8876	36.0552	47.2431	44.1369	3.6152	4.89833	3.74078	4.00344	8.65249
all_loops_1192	chr11	109480000	109490000	chr11	109720000	109730000	87	33.322	20.7279	18.7458	41.0273	2.60606	4.18188	4.62171	2.11781	7.06763	67	25.6779	17.8254	17.9261	34.6845	2.603	3.74329	3.72237	1.92902	5.49108
all_loops_1193	chr11	109530000	109540000	chr11	109580000	109590000	152	80.4556	75.0769	88.1472	78.1367	1.88814	2.02323	1.72357	1.9441	2.38884	175	80.5872	72.6233	88.0313	74.5141	2.17011	2.40776	1.98681	2.34674	2.85333
all_loops_1194	chr11	109530000	109540000	chr11	109720000	109730000	149	35.6717	30.8405	32.5598	49.5761	4.16809	4.81892	4.56524	3.00144	8.814	108	28.6524	26.0095	26.2837	41.4007	3.75968	4.14026	4.09723	2.60477	6.44953
all_loops_1195	chr11	109750000	109760000	chr11	109960000	109970000	132	62.4404	58.8666	66.8281	64.712	2.11223	2.24025	1.97376	2.0382	5.07544	79	43.124	46.0461	52.0604	49.0969	1.83	1.71412	1.51648	1.60782	3.47182
all_loops_1196	chr11	109750000	109760000	chr11	110120000	110130000	103	37.9475	40.1004	45.3748	52.3137	2.70977	2.56465	2.26719	1.96704	7.59502	63	34.7922	37.6418	41.3539	53.6939	1.80843	1.67189	1.52217	1.17299	4.9169
all_loops_1197	chr11	109980000	109990000	chr11	110120000	110130000	109	50.3149	44.2364	47.1332	58.7436	2.16404	2.46073	2.30982	1.85407	3.67587	75	41.063	38.4421	39.1388	47.1016	1.82446	1.94852	1.91392	1.59105	2.69334
all_loops_1198	chr11	110220000	110230000	chr11	110340000	110350000	213	78.6893	59.9118	68.2647	81.5537	2.70468	3.55097	3.1171	2.6098	5.27496	153	63.9729	53.234	58.3544	70.4149	2.38946	2.87059	2.61913	2.17117	3.89079
all_loops_1199	chr11	110390000	110400000	chr11	111300000	111310000	43	14.3632	12.0452	14.0401	17.0865	2.97999	3.54872	3.04807	2.50779	15.4791	19	11.1835	10.771	12.7433	13.1137	1.69274	1.75696	1.48715	1.44547	6.10493
all_loops_1200	chr11	110390000	110400000	chr11	111390000	111400000	39	17.8754	11.5796	15.0254	13.8789	2.1752	3.34773	2.58506	2.79707	11.2545	35	17.3479	13.1398	14.8907	16.9041	2.0117	2.65109	2.34146	2.06421	8.91397
all_loops_1201	chr11	110400000	110410000	chr11	110920000	110930000	79	43.9321	31.2664	36.0114	34.2963	1.79641	2.52181	2.19044	2.29967	10.4907	68	37.1423	30.8501	33.7956	33.6648	1.82857	2.20031	2.00911	2.01689	8.24967
all_loops_1202	chr11	110430000	110440000	chr11	110900000	110910000	81	27.0989	33.5869	31.6381	46.3446	2.98174	2.40746	2.55529	1.74616	10.0495	62	22.3978	31.6403	31.2987	44.1199	2.76027	1.9565	1.97779	1.40435	7.31829
all_loops_1203	chr11	111390000	111400000	chr11	112630000	112640000	40	9.66316	8.30023	13.9177	8.43427	4.10728	4.77368	2.86067	4.6987	15.6966	48	14.6543	11.2338	17.2255	10.7787	3.26006	4.24396	2.77626	4.4215	17.8549
all_loops_1204	chr11	111390000	111400000	chr11	113020000	113030000	43	5.46997	3.70992	8.38896	4.80147	7.73792	11.3126	5.07718	8.79329	33.566	51	6.07627	5.07614	11.357	4.72672	8.2736	9.87223	4.46017	10.5869	33.0583
all_loops_1205	chr11	111510000	111520000	chr11	112630000	112640000	31	6.84999	7.73122	11.4297	9.23566	4.47483	3.97128	2.69739	3.33131	12.4074	20	9.09359	8.87615	10.6178	10.9454	2.18631	2.23927	1.87539	1.81977	8.15783
all_loops_1206	chr11	111510000	111520000	chr11	113010000	113020000	22	3.85679	3.63262	5.239	4.43167	5.58533	5.92077	4.13935	4.87679	17.4029	9	2.56256	3.06235	4.05974	3.93267	3.41776	2.87761	2.18763	2.25657	6.79702
all_loops_1207	chr11	112640000	112650000	chr11	113020000	113030000	46	14.2351	9.22433	12.432	13.2112	3.21588	4.94405	3.6786	3.46325	9.33781	41	13.0605	8.62948	11.6425	10.3309	3.12298	4.70819	3.5001	3.94023	7.88094
all_loops_1208	chr11	113030000	113040000	chr11	113150000	113160000	98	32.4226	21.1014	23.1218	25.3176	3.01636	4.62706	4.22448	3.85953	5.41118	62	27.366	17.9354	18.9167	21.1491	2.26098	3.44322	3.26554	2.92247	3.99634
all_loops_1209	chr11	113030000	113040000	chr11	113490000	113500000	72	21.7636	17.5303	20.6005	25.1847	3.29771	4.08954	3.48301	2.85153	9.5341	78	18.994	17.2687	23.9368	22.5523	4.09029	4.49659	3.24919	3.44778	10.5628
all_loops_1210	chr11	113150000	113160000	chr11	113490000	113500000	101	35.3444	26.1427	31.261	34.224	2.85236	3.85251	3.22375	2.94546	9.43181	95	30.7846	24.6861	30.8152	28.8303	3.07921	3.83683	3.07616	3.28721	9.93693
all_loops_1211	chr11	113560000	113570000	chr11	113670000	113680000	197	33.5947	27.482	39.7019	40.1224	5.84959	7.14597	4.95203	4.90026	7.53031	187	34.6971	27.6629	42.9373	38.2494	5.37688	6.7392	4.34739	4.87882	7.00154
all_loops_1212	chr11	113720000	113730000	chr11	114490000	114500000	50	11.0587	8.69492	9.80084	12.2976	4.48977	5.69647	5.06018	4.0411	18.9529	8	7.83938	6.5172	5.92239	11.1604	1.02023	1.22408	1.34498	0.719335	2.87886
all_loops_1213	chr11	11450000	11460000	chr11	11690000	11700000	44	23.6979	18.3332	22.63	21.4431	1.8531	2.39242	1.94017	2.04706	3.25233	36	17.0671	13.4114	15.0315	14.543	2.10285	2.67182	2.38576	2.46534	2.6651
all_loops_1214	chr11	11450000	11460000	chr11	11870000	11880000	23	2.10627	4.50671	5.82454	5.72167	10.4702	5.01443	3.89904	3.96793	3.40707	23	3.46451	6.24388	5.32135	6.64403	6.48056	3.64131	4.26093	3.42525	3.32464
all_loops_1215	chr11	114600000	114610000	chr11	114650000	114660000	134	57.44	47.5456	53.6188	58.0173	2.33055	2.81453	2.49633	2.3074	3.08438	98	41.7332	38.3183	38.1963	43.4502	2.34503	2.55347	2.5616	2.25257	2.54342
all_loops_1216	chr11	114600000	114610000	chr11	114760000	114770000	84	24.6421	27.6992	33.9537	40.614	3.39907	3.02527	2.46963	2.06563	4.54283	68	21.1204	26.9663	27.6801	38.6631	3.20918	2.51604	2.4514	1.75682	3.94577
all_loops_1217	chr11	114660000	114670000	chr11	114770000	114780000	110	38.5406	34.4093	49.6806	41.3183	2.84933	3.19044	2.2117	2.65825	5.20906	67	33.3061	30.0675	41.0192	33.739	2.00862	2.22425	1.63184	1.98292	3.75138
all_loops_1218	chr11	114670000	114680000	chr11	114730000	114740000	245	72.1826	72.1751	105.293	64.3194	3.39086	3.39121	2.32559	3.80475	5.10573	180	60.5413	59.4547	94.6274	55.1992	2.96992	3.02411	1.90125	3.25683	4.37279
all_loops_1219	chr11	114950000	114960000	chr11	115000000	115010000	60	32.8072	28.896	31.3976	31.9747	1.82635	2.0727	1.90808	1.87375	2.23523	45	33.3004	26.6313	27.4301	31.4541	1.35028	1.68716	1.63821	1.42929	1.7337
all_loops_1220	chr11	115060000	115070000	chr11	115130000	115140000	110	49.2055	42.6424	50.2814	48.207	2.23302	2.5759	2.18533	2.27917	3.88035	111	44.1191	37.3953	44.0445	44.7079	2.51249	2.96304	2.51674	2.47947	4.37163
all_loops_1221	chr11	115220000	115230000	chr11	115270000	115280000	188	98.7065	89.7387	97.504	93.9721	1.90372	2.09375	1.92718	1.99953	3.13872	202	96.1027	91.7927	98.6938	91.5847	2.10077	2.1993	2.04568	2.20429	3.58282
all_loops_1222	chr11	115220000	115230000	chr11	115330000	115340000	114	39.5093	42.0148	53.4459	58.057	2.88063	2.70926	2.13088	1.96193	3.53789	111	40.4173	46.247	53.2247	66.9593	2.74204	2.39714	2.08346	1.65674	3.62862
all_loops_1223	chr11	115280000	115290000	chr11	115330000	115340000	164	78.5315	60.6992	66.6017	73.3515	2.08695	2.69905	2.46021	2.23413	3.8325	159	71.194	57.5187	56.0787	67.9956	2.2316	2.76126	2.83203	2.33642	3.84764
all_loops_1224	chr11	115500000	115510000	chr11	115570000	115580000	269	95.4677	86.1154	106.575	91.1444	2.81581	3.12125	2.52262	2.94922	5.67172	247	94.4596	88.8053	109.598	94.3782	2.61317	2.77936	2.25255	2.61542	5.80015
all_loops_1225	chr11	115500000	115510000	chr11	115650000	115660000	65	22.6292	26.3527	36.0981	29.735	2.86416	2.46099	1.79844	2.182	3.75861	61	27.8978	29.9946	40.5177	35.5796	2.18231	2.03027	1.50427	1.71246	3.50002
all_loops_1226	chr11	115580000	115590000	chr11	115670000	115680000	146	41.2497	37.493	54.6162	39.795	3.53328	3.88636	2.67014	3.66211	7.40849	104	39.2514	34.7775	49.2542	34.9244	2.64539	2.98474	2.10924	2.97221	6.34506
all_loops_1227	chr11	115800000	115810000	chr11	115860000	115870000	182	59.1088	55.7456	60.5784	68.9301	3.07556	3.26078	3.00107	2.63798	6.11069	176	61.7831	61.2159	67.6309	76.5395	2.84569	2.87201	2.59999	2.29777	6.26085
all_loops_1228	chr11	115940000	115950000	chr11	115990000	116000000	140	62.4128	52.9954	55.2334	58.8963	2.24114	2.63865	2.53192	2.37473	4.77973	96	56.1778	49.6517	51.5371	53.507	1.7076	1.93159	1.86107	1.79268	3.60366
all_loops_1229	chr11	116080000	116090000	chr11	116150000	116160000	167	58.2422	50.4543	54.986	60.1686	2.86414	3.30535	3.03344	2.77259	5.98671	142	53.0814	48.964	55.7182	54.2516	2.67199	2.89622	2.54576	2.61446	5.38146
all_loops_1230	chr11	116090000	116100000	chr11	116320000	116330000	50	18.571	15.7347	16.6145	21.8297	2.6833	3.16394	2.99739	2.28458	5.53697	45	21.3971	18.3935	20.0671	24.9875	2.09796	2.43869	2.23632	1.79771	4.77561
all_loops_1231	chr11	116180000	116190000	chr11	116300000	116310000	138	46.2201	47.9663	47.0454	65.5464	2.98143	2.87312	2.92924	2.10369	6.5981	132	42.3406	45.3011	42.2641	57.6149	3.11258	2.90962	3.1182	2.28884	6.68495
all_loops_1232	chr11	116500000	116510000	chr11	116670000	116680000	117	52.1878	41.5043	43.7187	60.1579	2.23953	2.81461	2.67237	1.94331	7.0322	101	49.155	41.8544	41.6471	66.4713	2.05258	2.40976	2.42173	1.51867	6.23353
all_loops_1233	chr11	116530000	116540000	chr11	116670000	116680000	115	54.7702	45.1091	44.7139	56.9107	2.09768	2.54595	2.5684	2.01892	6.72713	91	46.9521	41.5993	42.0288	54.3324	1.93615	2.18469	2.16242	1.67364	5.69668
all_loops_1234	chr11	116740000	116750000	chr11	116900000	116910000	132	46.7411	36.041	51.0068	43.4602	2.82018	3.65513	2.58478	3.03258	7.51328	114	39.2266	31.967	45.4686	37.2785	2.90135	3.55817	2.50391	3.05255	6.78486
all_loops_1235	chr11	116930000	116940000	chr11	117030000	117040000	189	39.3857	36.5823	52.2626	40.4762	4.78907	5.15507	3.61135	4.66037	8.51838	159	38.3396	37.5689	53.1416	42.1647	4.13896	4.22364	2.98827	3.76437	7.55165
all_loops_1236	chr11	116930000	116940000	chr11	117210000	117220000	31	12.007	10.6836	12.0298	11.4549	2.56877	2.88401	2.56393	2.6915	2.71526	48	16.5556	14.4931	17.8523	17.1274	2.88791	3.29609	2.67933	2.79206	4.30784
all_loops_1237	chr11	117090000	117100000	chr11	117210000	117220000	165	67.3762	53.9303	67.804	71.1819	2.44679	3.05569	2.43138	2.31616	6.1137	186	75.2645	60.2089	68.3268	85.3102	2.46933	3.08578	2.71969	2.1789	6.68985
all_loops_1238	chr11	11710000	11720000	chr11	11870000	11880000	267	78.7859	46.0679	51.0532	65.7505	3.3859	5.78541	5.22157	4.05616	8.61058	266	64.5288	40.3081	43.7042	59.4752	4.11736	6.58531	6.07476	4.46663	9.92678
all_loops_1239	chr11	11710000	11720000	chr11	12190000	12200000	56	13.5289	14.5964	20.0333	20.5403	4.11625	3.81727	2.78643	2.71798	6.62906	42	13.4658	13.5674	17.5531	15.452	3.10339	3.08033	2.38485	2.70705	5.386
all_loops_1240	chr11	117100000	117110000	chr11	117170000	117180000	140	61.6355	70.0145	85.3088	75.7144	2.26936	1.99816	1.64035	1.84793	4.01676	132	68.1879	73.9164	91.0506	83.4308	1.93446	1.78474	1.44925	1.58145	3.95786
all_loops_1241	chr11	117730000	117740000	chr11	117960000	117970000	59	19.3438	14.3126	19.0264	14.4625	3.03953	4.10058	3.08998	4.05836	7.13011	81	26.9162	19.1668	26.4287	20.9693	3.0019	4.20931	3.05706	3.8492	9.60842
all_loops_1242	chr11	117740000	117750000	chr11	117880000	117890000	113	52.2324	46.8282	65.3896	50.6215	2.16119	2.41006	1.72699	2.22982	5.40965	91	54.6726	50.696	72.3588	51.8744	1.66324	1.79345	1.25727	1.75279	4.51531
all_loops_1243	chr11	117770000	117780000	chr11	117820000	117830000	156	75.8557	78.7873	72.9572	88.329	2.05514	1.97877	2.13668	1.76526	3.88552	122	78.2356	76.5625	69.0038	93.627	1.55868	1.59269	1.76691	1.30272	3.33243
all_loops_1244	chr11	117770000	117780000	chr11	117880000	117890000	127	37.2875	49.2441	61.0535	69.4785	3.39953	2.57579	2.07838	1.82671	4.97639	104	37.0315	52.1641	68.7186	68.449	2.80355	1.99181	1.51267	1.51862	4.2454
all_loops_1245	chr11	117830000	117840000	chr11	117880000	117890000	152	55.6945	51.3388	51.6629	55.9579	2.72608	2.95691	2.9384	2.71327	4.00744	158	61.166	55.528	60.0421	60.6073	2.58055	2.84209	2.62877	2.6043	4.30293
all_loops_1246	chr11	11790000	11800000	chr11	11860000	11870000	144	67.5076	68.8897	80.168	94.7452	2.13142	2.08872	1.79524	1.51932	2.61539	108	54.571	55.152	58.4986	72.4285	1.97728	1.95649	1.84475	1.49045	2.3263
all_loops_1247	chr11	118180000	118190000	chr11	118230000	118240000	178	70.3098	86.9789	87.4778	85.1676	2.52948	2.04527	2.03362	2.08872	4.12338	189	82.8799	95.4502	98.9449	97.2655	2.27886	1.97907	1.90923	1.94217	4.24296
all_loops_1248	chr11	118310000	118320000	chr11	118600000	118610000	52	20.7069	17.8137	19.8512	23.7069	2.50398	2.9084	2.61138	2.18845	4.93178	49	20.5193	17.6001	19.7361	27.6682	2.38127	2.77399	2.47528	1.76821	4.91199
all_loops_1249	chr11	118430000	118440000	chr11	118500000	118510000	69	30.0991	32.7697	36.767	34.7187	2.28815	2.10224	1.87431	1.98457	3.20398	47	25.0943	29.0434	34.184	33.3616	1.86947	1.61614	1.37382	1.40758	2.5122
all_loops_1250	chr11	118440000	118450000	chr11	118600000	118610000	106	40.4785	51.3255	55.7137	60.6451	2.61469	2.06318	1.90097	1.74664	4.57731	81	35.0367	41.9124	45.8317	41.9249	2.30813	1.93038	1.76566	1.92981	3.93363
all_loops_1251	chr11	118500000	118510000	chr11	118600000	118610000	96	43.9668	44.9762	47.369	51.7029	2.18078	2.13195	2.02448	1.85511	3.74033	56	34.3449	35.7108	35.7147	39.2055	1.62869	1.56657	1.5664	1.42728	2.42968
all_loops_1252	chr11	11880000	11890000	chr11	12180000	12190000	51	22.4998	16.9522	22.3028	21.5558	2.26109	2.99669	2.28097	2.35965	5.21406	34	16.6179	15.4631	17.1304	19.1662	2.03973	2.19108	1.97906	1.76994	3.55835
all_loops_1253	chr11	118910000	118920000	chr11	118980000	118990000	143	51.1521	62.2949	82.6389	77.6451	2.79208	2.29346	1.72954	1.84063	3.2494	139	49.9057	63.6083	87.0515	77.8252	2.78168	2.18339	1.59607	1.78505	3.47741
all_loops_1254	chr11	118910000	118920000	chr11	119050000	119060000	237	69.4477	60.3731	61.5867	90.036	3.40917	3.92075	3.84362	2.63047	8.16639	195	66.4874	61.5634	70.1004	87.2238	2.92999	3.16395	2.77918	2.23421	7.13418
all_loops_1255	chr11	119360000	119370000	chr11	119470000	119480000	74	36.5587	32.4036	37.1325	35.4101	2.02135	2.27975	1.99019	2.08673	3.5827	69	34.1046	32.5613	37.3131	30.6624	2.0202	2.11566	1.84695	2.24625	3.31898
all_loops_1256	chr11	119800000	119810000	chr11	119850000	119860000	162	86.2721	78.7641	76.3281	87.5362	1.87676	2.05544	2.12095	1.84969	3.86909	169	89.0901	80.8095	74.6789	99.7439	1.89595	2.08999	2.26133	1.69364	4.15118
all_loops_1257	chr11	119990000	120000000	chr11	120150000	120160000	78	43.6061	38.8812	36.539	45.5035	1.78694	2.00353	2.13161	1.71259	4.86462	75	44.8421	43.0773	41.1304	52.0223	1.67104	1.73934	1.82147	1.44084	4.61891
all_loops_1258	chr11	120040000	120050000	chr11	120090000	120100000	211	91.1294	92.8382	85.4412	92.6142	2.31395	2.2714	2.46782	2.27689	4.4228	173	75.387	88.9784	82.452	82.606	2.29311	1.94323	2.09686	2.09296	3.95311
all_loops_1259	chr11	120370000	120380000	chr11	120430000	120440000	262	100.998	105.77	125.821	116.974	2.59253	2.47567	2.08146	2.23876	5.69303	206	86.7071	99.3366	118.985	106.582	2.37423	2.07268	1.73069	1.93192	5.00594
all_loops_1260	chr11	120580000	120590000	chr11	120630000	120640000	268	83.41	78.1553	80.5612	85.4327	3.21039	3.42596	3.32378	3.13447	5.80924	174	75.0933	67.7005	74.9384	74.3456	2.31537	2.56783	2.32015	2.33862	4.32533
all_loops_1261	chr11	120680000	120690000	chr11	120760000	120770000	96	53.0028	46.6482	57.5843	51.8758	1.8097	2.05569	1.66596	1.84894	3.65954	75	42.6968	40.3339	45.7217	42.6589	1.7548	1.85735	1.63896	1.75636	3.28678
all_loops_1262	chr11	120760000	120770000	chr11	120900000	120910000	52	22.7339	21.3523	21.2664	26.7505	2.28169	2.42864	2.43841	1.94037	3.51476	67	21.7754	20.3753	21.3015	24.3719	3.06738	3.27712	3.13529	2.74192	5.12388
all_loops_1263	chr11	120920000	120930000	chr11	121060000	121070000	110	46.9747	41.7192	45.4626	50.5725	2.33884	2.63276	2.41645	2.17278	5.04436	104	42.0236	39.2425	46.7207	49.9599	2.4713	2.646	2.22338	2.07951	5.29777
all_loops_1264	chr11	121330000	121340000	chr11	121450000	121460000	85	41.0693	37.5899	48.1711	39.4073	2.06708	2.2579	1.76296	2.15403	3.96568	53	37.5007	33.7794	41.2879	34.4336	1.41221	1.56733	1.28298	1.53763	2.70206
all_loops_1265	chr11	12260000	12270000	chr11	12440000	12450000	70	31.0555	27.9356	28.5784	36.8505	2.25001	2.50039	2.44435	1.89713	3.60341	56	29.245	28.01	29.1844	35.5169	1.91174	1.99573	1.9157	1.57509	2.89401
all_loops_1266	chr11	16420000	16430000	chr11	16650000	16660000	109	48.6287	36.7771	53.516	36.1826	2.23893	2.95847	2.03484	3.00695	4.77533	101	45.3226	35.0455	48.6266	35.8562	2.22577	2.87661	2.07484	2.81176	4.7391
all_loops_1267	chr11	16420000	16430000	chr11	16840000	16850000	154	33.8471	26.8267	38.0301	30.6515	4.53941	5.72294	4.04142	5.01113	15.4144	115	35.5401	29.1824	39.826	32.7319	3.22951	3.93069	2.88283	3.50574	11.6371
all_loops_1268	chr11	16490000	16500000	chr11	16650000	16660000	97	40.1335	46.4286	48.2581	56.191	2.41341	2.08689	2.00794	1.72497	3.66744	93	40.8667	44.1138	49.1676	51.3284	2.27258	2.10568	1.88968	1.81028	3.8229
all_loops_1269	chr11	16530000	16540000	chr11	44260000	44270000	30	0.320455	0.359631	0.821901	0.588125	71.5891	65.4873	32.6499	43.742	213.066	25	0.127486	0.250667	0.860425	0.294239	110.336	71.5778	26.1342	63.667	148.469
all_loops_1270	chr11	16650000	16660000	chr11	16770000	16780000	99	50.9784	48.63	54.514	56.7103	1.94016	2.03365	1.81455	1.7444	2.80905	90	64.426	57.0197	63.8706	64.9793	1.39634	1.57739	1.40846	1.38446	2.85165
all_loops_1271	chr11	16650000	16660000	chr11	16840000	16850000	78	33.2949	26.5573	28.6028	36.2339	2.33868	2.92978	2.72099	2.14951	2.93003	59	36.6498	27.602	33.0783	35.3043	1.60817	2.13342	1.78129	1.66929	2.44219
all_loops_1272	chr11	16670000	16680000	chr11	16760000	16770000	93	44.8099	45.5578	47.0939	55.371	2.07304	2.03908	1.97271	1.67835	2.85158	83	58.8013	57.2937	56.7241	69.61	1.41083	1.44789	1.46241	1.19208	2.74191
all_loops_1273	chr11	17180000	17190000	chr11	19660000	19670000	24	7.39874	5.51788	6.64724	6.78151	3.21387	4.28988	3.57183	3.50214	38.9685	14	4.89999	4.46244	4.96438	5.56728	2.82001	3.09045	2.78415	2.48796	19.9258
all_loops_1274	chr11	18770000	18780000	chr11	18920000	18930000	116	39.9517	31.9672	37.375	37.4786	2.89875	3.62052	3.09807	3.08953	4.76508	116	40.7484	32.8374	34.432	39.4758	2.84222	3.52487	3.3621	2.93361	5.02987
all_loops_1275	chr11	18790000	18800000	chr11	18910000	18920000	78	34.2248	32.2671	34.2664	37.7451	2.27533	2.41294	2.27257	2.06367	3.11269	63	33.5098	32.742	36.8058	41.8834	1.87743	1.92132	1.70976	1.50298	2.49739
all_loops_1276	chr11	19730000	19740000	chr11	19810000	19820000	121	46.5789	41.2176	45.6606	43.8943	2.59432	2.93096	2.64638	2.75263	3.54272	99	49.3714	42.2964	58.4067	44.4037	2.00318	2.33746	1.69382	2.22678	3.18487
all_loops_1277	chr11	19730000	19740000	chr11	19960000	19970000	69	22.2083	18.9764	32.0152	19.9312	3.09751	3.62228	2.15163	3.44962	6.47864	62	23.3616	18.2761	36.1283	15.4591	2.64688	3.37938	1.71413	3.99123	5.79309
all_loops_1278	chr11	19820000	19830000	chr11	19960000	19970000	83	40.0544	39.2282	47.662	46.9914	2.06951	2.11299	1.73988	1.76465	3.48136	96	45.1766	40.4762	48.864	43.8087	2.12251	2.36838	1.96267	2.18863	4.29091
all_loops_1279	chr11	20010000	20020000	chr11	97020000	97030000	30	0.0305998	0.0250931	0.0399053	0.63576	230.475	240.621	215.146	40.9101	808.123	15	0.0507353	0.0388842	0.0412766	0.709624	100.176	108.724	106.883	18.6506	396.079
all_loops_1280	chr11	20030000	20040000	chr11	20110000	20120000	135	70.281	65.0994	82.9571	55.4346	1.91955	2.0721	1.62659	2.43272	3.30444	74	52.9326	52.6848	67.2038	46.2893	1.39725	1.40381	1.10098	1.59735	2.03103
all_loops_1281	chr11	20030000	20040000	chr11	20290000	20300000	75	20.5399	18.4975	22.4755	22.9011	3.63859	4.03818	3.32661	3.26506	5.9112	47	23.4203	20.3374	25.3207	24.9407	2.00252	2.30459	1.85282	1.88094	3.83285
all_loops_1282	chr11	20160000	20170000	chr11	20290000	20300000	146	56.2542	54.466	65.487	73.3781	2.59253	2.67749	2.22757	1.98835	4.71734	151	50.476	49.2756	56.0755	64.5095	2.98758	3.06022	2.68978	2.33867	5.0222
all_loops_1283	chr11	20340000	20350000	chr11	20580000	20590000	110	45.9775	32.6631	52.5432	30.3163	2.38945	3.36049	2.09144	3.61976	8.68831	81	46.6004	33.6065	47.5153	35.3307	1.7366	2.40607	1.70323	2.28897	6.55243
all_loops_1284	chr11	20350000	20360000	chr11	20530000	20540000	160	47.4621	54.4592	83.09	47.1286	3.36613	2.93442	1.92451	3.38989	6.92627	117	47.7038	51.5097	81.1201	46.7917	2.4496	2.26895	1.44176	2.49724	5.33597
all_loops_1285	chr11	20440000	20450000	chr11	20530000	20540000	171	80.88	82.766	89.5126	93.145	2.11287	2.06478	1.90933	1.83495	3.6095	151	71.5607	74.9169	77.9293	80.2465	2.10855	2.01421	1.93645	1.8806	3.59393
all_loops_1286	chr11	20690000	20700000	chr11	20810000	20820000	192	58.3014	49.5103	62.3167	53.4102	3.2893	3.87218	3.0777	3.58997	6.26452	190	57.275	45.887	56.9961	50.5757	3.31329	4.13378	3.32947	3.75131	6.85132
all_loops_1287	chr11	20690000	20700000	chr11	21070000	21080000	101	21.9663	26.375	35.1903	32.8753	4.58165	3.8187	2.86481	3.06593	11.003	92	21.5069	24.0437	30.3595	27.5381	4.26252	3.81467	3.02368	3.33235	10.2966
all_loops_1288	chr11	20810000	20820000	chr11	21080000	21090000	129	55.6328	45.7848	54.343	53.8883	2.31641	2.81357	2.37129	2.39126	7.27822	89	48.1193	41.2366	44.0671	49.6842	1.84781	2.15548	2.01734	1.78973	5.25293
all_loops_1289	chr11	21250000	21260000	chr11	21350000	21360000	170	61.1011	52.5273	58.686	63.557	2.77936	3.23217	2.89355	2.67213	5.68747	148	50.7182	43.145	48.1582	53.018	2.91431	3.42467	3.06891	2.78813	5.3966
all_loops_1290	chr11	21560000	21570000	chr11	21870000	21880000	71	27.4886	32.8374	36.3847	35.1634	2.57716	2.15864	1.94876	2.01626	5.47665	33	21.8752	25.3527	23.9261	29.022	1.50624	1.30045	1.37767	1.1366	2.60219
all_loops_1291	chr11	22120000	22130000	chr11	22330000	22340000	86	32.1205	31.9662	36.2943	33.1714	2.67221	2.68507	2.36576	2.58781	4.85857	85	29.7779	31.88	35.1832	37.1981	2.84826	2.66104	2.41192	2.28161	4.93353
all_loops_1292	chr11	22120000	22130000	chr11	22510000	22520000	138	28.4631	21.0626	27.063	31.1739	4.83492	6.52568	5.08412	4.41582	16.2747	120	27.9544	21.0715	27.4824	31.4434	4.28097	5.67273	4.35422	3.80745	14.0548
all_loops_1293	chr11	22120000	22130000	chr11	22850000	22860000	31	8.93698	8.24011	9.95054	9.65641	3.44141	3.72897	3.09436	3.18765	8.35352	20	10.0316	9.35831	9.08558	12.3592	1.98389	2.12511	2.18821	1.61326	5.29464
all_loops_1294	chr11	22530000	22540000	chr11	22750000	22760000	105	36.6718	30.3432	43.09	30.8987	2.85817	3.45233	2.43344	3.39046	6.15696	76	41.6002	31.1842	41.4133	34.3904	1.82493	2.43254	1.83315	2.20641	4.72554
all_loops_1295	chr11	22530000	22540000	chr11	22850000	22860000	131	26.4471	21.3642	28.8762	34.586	4.9384	6.10786	4.5244	3.77962	14.0869	112	24.373	20.8956	29.191	31.9176	4.58055	5.33922	3.82711	3.5012	12.5832
all_loops_1296	chr11	22540000	22550000	chr11	23160000	23170000	30	6.26	8.92788	10.6354	9.24969	4.7327	3.33412	2.8038	3.21936	4.46021	19	7.39211	11.5726	12.7924	14.1487	2.54935	1.63631	1.4815	1.34048	2.68899
all_loops_1297	chr11	22760000	22770000	chr11	22850000	22860000	112	47.663	40.3408	44.5871	50.1417	2.347	2.77195	2.50855	2.23121	3.73516	77	41.7992	35.9782	39.0382	47.8608	1.84013	2.13702	1.96994	1.60756	2.76661
all_loops_1298	chr11	22900000	22910000	chr11	23170000	23180000	161	62.4249	46.7581	61.6413	51.5402	2.57657	3.43804	2.60927	3.11966	7.47574	132	59.3398	46.1031	58.7475	51.7606	2.22242	2.85912	2.24478	2.54721	6.0994
all_loops_1299	chr11	22920000	22930000	chr11	23150000	23160000	62	26.8359	31.1442	30.7791	38.2553	2.30548	1.98757	2.01107	1.61907	5.05743	30	24.0895	27.7846	26.497	36.9057	1.24434	1.07945	1.13171	0.813389	2.60697
all_loops_1300	chr11	23050000	23060000	chr11	23170000	23180000	111	49.681	45.2986	53.1062	37.6194	2.23177	2.44721	2.0881	2.94543	3.48412	95	44.621	38.2068	47.95	30.7129	2.12652	2.48259	1.97919	3.08637	3.01551
all_loops_1301	chr11	23400000	23410000	chr11	23460000	23470000	141	67.6911	64.7794	70.5569	79.4275	2.08139	2.1748	1.99697	1.77423	3.09858	112	62.613	58.4981	61.0556	68.7734	1.78751	1.91303	1.83303	1.62762	2.56234
all_loops_1302	chr11	23580000	23590000	chr11	23780000	23790000	52	29.2844	24.0395	29.3405	30.0763	1.77305	2.15828	1.76967	1.72652	2.89049	49	35.2645	27.4877	37.3464	35.1793	1.3884	1.77978	1.31121	1.39175	2.56811
all_loops_1303	chr11	23580000	23590000	chr11	23850000	23860000	58	16.4668	11.3558	14.6695	16.4167	3.50701	5.07167	3.93377	3.51766	5.40921	68	16.1057	11.8716	17.4627	18.488	4.20223	5.68848	3.87753	3.66366	6.06584
all_loops_1304	chr11	28700000	28710000	chr11	28930000	28940000	84	22.4312	25.7289	29.2844	31.9111	3.73261	3.25605	2.86206	2.62721	5.31744	79	20.6745	25.6684	29.484	28.1852	3.80756	3.06965	2.67374	2.79652	5.42535
all_loops_1305	chr11	29160000	29170000	chr11	29780000	29790000	32	7.68435	8.73382	11.4661	7.79222	4.12366	3.63376	2.77536	4.0673	6.09855	36	9.83177	10.7808	14.4726	11.3191	3.6348	3.31777	2.47725	3.16138	6.27388
all_loops_1306	chr11	29440000	29450000	chr11	29590000	29600000	101	52.0727	41.249	40.9113	60.8626	1.9378	2.44504	2.46517	1.65839	4.08207	96	40.3397	36.2786	36.2549	49.4408	2.37638	2.64166	2.64338	1.93982	4.1368
all_loops_1307	chr11	29470000	29480000	chr11	29600000	29610000	89	44.404	39.8598	48.0219	42.7842	2.00207	2.22974	1.85155	2.07769	3.77468	39	30.1083	30.6634	34.4197	34.6616	1.29435	1.27099	1.13269	1.1248	1.91982
all_loops_1308	chr11	29470000	29480000	chr11	29780000	29790000	60	25.7964	24.8042	26.8851	31.8746	2.32078	2.41325	2.22715	1.87962	4.00672	65	25.7179	29.462	29.6206	38.3514	2.52151	2.20215	2.1904	1.69305	4.60367
all_loops_1309	chr11	29610000	29620000	chr11	29780000	29790000	105	47.569	36.0568	39.9657	46.9576	2.20479	2.90678	2.62319	2.23344	4.29369	99	46.2468	37.6179	37.9609	48.0864	2.13823	2.6274	2.60372	2.0566	4.42795
all_loops_1310	chr11	29990000	30000000	chr11	30560000	30570000	48	15.3278	15.8656	16.6794	17.7302	3.11775	3.01272	2.86662	2.69767	7.63595	21	12.7055	15.4126	16.7085	17.6431	1.64773	1.36019	1.25532	1.18919	3.18406
all_loops_1311	chr11	30020000	30030000	chr11	30730000	30740000	40	13.0075	13.7605	18.6145	14.7078	3.05931	2.89312	2.14273	2.70803	8.97638	33	15.7562	17.6526	23.3764	15.638	2.08751	1.86452	1.40993	2.10319	6.91444
all_loops_1312	chr11	30570000	30580000	chr11	30690000	30700000	101	30.1615	24.8037	32.7444	24.5932	3.34088	4.05963	3.07815	4.09424	4.44033	45	21.5762	18.4831	23.0569	16.1846	2.08063	2.42694	1.94759	2.76948	2.17953
all_loops_1313	chr11	3070000	3080000	chr11	4760000	4770000	34	2.705	2.02695	1.11364	3.08685	12.1569	16.0324	28.0974	10.7002	6.78655	39	4.46188	3.59532	1.4882	3.55498	8.57102	10.5809	24.6191	10.6977	6.61739
all_loops_1314	chr11	30730000	30740000	chr11	30840000	30850000	74	40.3829	34.5532	35.2633	42.9337	1.8304	2.13833	2.09539	1.72191	2.16171	74	34.674	33.8903	32.7349	42.9603	2.1309	2.18004	2.25675	1.72084	2.1668
all_loops_1315	chr11	31150000	31160000	chr11	31270000	31280000	61	27.8664	24.3579	28.81	27.8669	2.18477	2.49817	2.11346	2.18472	3.17925	37	19.0757	18.6759	21.0492	19.2339	1.93474	1.97593	1.7542	1.91891	2.22029
all_loops_1316	chr11	31150000	31160000	chr11	31530000	31540000	62	17.8612	15.6802	19.4431	21.1672	3.45745	3.93531	3.17759	2.91999	9.28748	47	17.0203	14.6536	18.3116	17.1958	2.75111	3.19245	2.55817	2.72321	7.47542
all_loops_1317	chr11	31570000	31580000	chr11	31840000	31850000	143	25.8072	21.7745	31.2308	24.6239	5.52357	6.54188	4.56739	5.78791	14.6737	127	22.3535	20.873	29.4407	23.9741	5.66058	6.06017	4.30254	5.27953	13.1626
all_loops_1318	chr11	32080000	32090000	chr11	32130000	32140000	103	46.3128	44.7523	49.1276	51.3324	2.22137	2.29866	2.09435	2.00457	2.76881	85	40.5778	36.7121	39.2383	44.4586	2.09205	2.31174	2.16328	1.90985	2.45933
all_loops_1319	chr11	32350000	32360000	chr11	32480000	32490000	54	21.3369	22.7281	30.7101	30.209	2.52368	2.36988	1.75592	1.78495	3.1665	70	23.0475	24.9583	28.8053	32.8581	3.0284	2.79748	2.42516	2.12695	4.35311
all_loops_1320	chr11	3240000	3250000	chr11	3300000	3310000	102	45.0814	45.8055	52.8853	47.2275	2.25978	2.22413	1.92695	2.15731	3.69074	94	45.274	50.1333	55.7242	52.2346	2.07387	1.87326	1.68565	1.79804	3.50863
all_loops_1321	chr11	32520000	32530000	chr11	32600000	32610000	160	55.8114	44.5391	53.0295	49.0217	2.86346	3.58654	3.01339	3.25925	5.01346	119	57.9702	46.9122	56.6485	52.0378	2.05097	2.53338	2.09873	2.28433	4.07529
all_loops_1322	chr11	32530000	32540000	chr11	33040000	33050000	23	5.14046	4.04021	4.29601	6.79875	4.40801	5.57943	5.25476	3.34843	5.71068	21	5.81133	5.39393	4.15557	11.2764	3.56942	3.8406	4.95821	1.85471	4.85624
all_loops_1323	chr11	32610000	32620000	chr11	33050000	33060000	47	22.1871	12.527	12.336	20.2611	2.11333	3.73011	3.7874	2.31324	6.65981	59	25.5105	15.4202	14.2033	28.1604	2.30765	3.80793	4.13192	2.09127	7.80611
all_loops_1324	chr11	33070000	33080000	chr11	33190000	33200000	67	21.9831	17.3062	18.8501	20.0269	3.03853	3.85494	3.54088	3.33385	2.66392	53	21.5781	17.2055	17.71	17.514	2.44948	3.06838	2.98148	3.01464	2.13493
all_loops_1325	chr11	33070000	33080000	chr11	33620000	33630000	24	6.93232	4.89601	6.51717	4.43857	3.42703	4.82385	3.64204	5.31004	6.40599	11	6.93527	4.67385	6.20724	3.50854	1.57776	2.32517	1.75988	3.07603	2.99885
all_loops_1326	chr11	33460000	33470000	chr11	33510000	33520000	47	18.0168	18.6014	18.4006	19.6574	2.59979	2.51853	2.54586	2.38391	2.39837	38	17.6683	18.1289	18.107	19.9726	2.14427	2.09008	2.0926	1.89811	1.99248
all_loops_1327	chr11	3360000	3370000	chr11	3410000	3420000	178	81.4336	66.0588	66.1111	83.8585	2.18438	2.69201	2.68988	2.12129	3.54388	181	72.9684	58.4409	58.2339	76.1321	2.4785	3.09357	3.10454	2.37564	3.91048
all_loops_1328	chr11	33630000	33640000	chr11	33810000	33820000	163	27.7736	22.8696	27.7274	28.8701	5.85141	7.10068	5.86113	5.62994	11.7573	146	28.0699	23.69	28.0966	31.7937	5.18639	6.14124	5.18147	4.58084	10.7316
all_loops_1329	chr11	3430000	3440000	chr11	3680000	3690000	46	12.5117	13.9959	16.9267	16.5276	3.65534	3.27044	2.70752	2.7725	4.45612	34	11.9968	16.2889	17.5863	22.2583	2.81894	2.08068	1.92804	1.52516	3.38104
all_loops_1330	chr11	34650000	34660000	chr11	35260000	35270000	26	6.84697	5.53774	5.71724	6.60723	3.75703	4.62952	4.48667	3.89132	11.442	15	5.79742	4.81409	5.1779	6.17017	2.56044	3.0728	2.86099	2.40823	6.09004
all_loops_1331	chr11	34650000	34660000	chr11	35610000	35620000	22	4.18163	3.44398	5.59807	2.1444	5.16159	6.23593	3.8785	9.84673	14.8174	6	5.77059	4.18465	8.13652	2.50499	1.03908	1.42369	0.740604	2.34166	3.53975
all_loops_1332	chr11	34930000	34940000	chr11	35260000	35270000	31	8.86489	8.53183	11.7174	7.96627	3.46909	3.60294	2.63172	3.85556	6.14535	15	8.30341	7.60278	8.37547	8.59164	1.79689	1.96033	1.78161	1.7373	3.07613
all_loops_1333	chr11	35710000	35720000	chr11	35800000	35810000	93	48.2777	41.8825	37.1889	60.9553	1.92444	2.21759	2.49672	1.52485	3.05142	92	54.0029	46.9015	43.9389	63.1193	1.70231	1.95951	2.09133	1.45683	3.17838
all_loops_1334	chr11	35730000	35740000	chr11	35810000	35820000	91	48.2391	40.0396	45.2658	44.5605	1.8846	2.26958	2.00812	2.03984	3.22213	93	52.5755	44.6426	52.8497	44.4261	1.76743	2.08079	1.75827	2.09091	3.47718
all_loops_1335	chr11	3610000	3620000	chr11	3680000	3690000	111	31.1586	33.7391	38.7282	38.1368	3.55422	3.28318	2.86132	2.90558	5.5548	53	26.6921	27.381	36.9513	29.2867	1.98193	1.93224	1.43315	1.80694	2.86443
all_loops_1336	chr11	3700000	3710000	chr11	3810000	3820000	104	42.8656	40.4276	54.9146	37.8747	2.42287	2.56862	1.89223	2.7413	4.35247	76	39.2528	39.9573	57.8413	35.0007	1.93379	1.89978	1.3134	2.16805	3.29075
all_loops_1337	chr11	3710000	3720000	chr11	3770000	3780000	133	61.6163	63.0829	72.7092	68.3046	2.15664	2.10658	1.82806	1.94578	3.25792	122	56.5742	60.1031	71.1129	66.7349	2.15442	2.02813	1.71458	1.82689	3.06129
all_loops_1338	chr11	3900000	3910000	chr11	3980000	3990000	128	59.996	55.8776	67.9624	60.378	2.13159	2.28841	1.8821	2.11813	3.51256	89	45.0825	45.7476	51.9042	49.8891	1.972	1.94339	1.71332	1.78239	2.50232
all_loops_1339	chr11	39400000	39410000	chr11	39960000	39970000	41	15.2494	13.0618	15.2778	13.5316	2.67762	3.12267	2.67268	3.01506	6.06821	23	12.8607	11.9898	12.6676	13.3461	1.78231	1.9107	1.80927	1.71797	3.20364
all_loops_1340	chr11	39400000	39410000	chr11	40280000	40290000	44	8.2138	11.2998	11.7762	15.8324	5.30444	3.86847	3.7133	2.76794	11.1869	35	7.81392	11.0094	12.705	14.459	4.43522	3.15948	2.74111	2.41089	7.94788
all_loops_1341	chr11	39400000	39410000	chr11	40410000	40420000	31	7.71982	8.24465	9.73516	8.77895	3.97707	3.72694	3.16213	3.50267	12.5706	24	8.06548	7.96274	8.00307	8.32387	2.95145	2.98906	2.97418	2.86092	8.43285
all_loops_1342	chr11	39960000	39970000	chr11	40280000	40290000	68	27.594	24.1609	23.9978	31.4014	2.45902	2.80699	2.82598	2.16181	4.77265	75	29.9873	25.2581	25.4413	30.2914	2.49607	2.96158	2.94033	2.47109	5.06251
all_loops_1343	chr11	4030000	4040000	chr11	4110000	4120000	140	69.0974	58.4973	64.0439	74.1673	2.02464	2.3909	2.18415	1.88643	4.01031	152	58.5745	52.9237	58.2686	67.0731	2.59227	2.86853	2.60585	2.2643	4.76667
all_loops_1344	chr11	41360000	41370000	chr11	41540000	41550000	32	10.517	11.3706	10.8368	11.1209	3.02344	2.79845	2.93505	2.86073	2.43495	31	12.0512	12.3738	12.1042	15.7575	2.55942	2.49323	2.54829	1.96122	2.08373
all_loops_1345	chr11	4150000	4160000	chr11	4320000	4330000	270	70.6664	66.0624	80.9886	90.766	3.81678	4.08238	3.33093	2.97251	10.1118	251	79.1281	68.4736	75.8695	95.3138	3.16933	3.66176	3.30527	2.63169	10.012
all_loops_1346	chr11	4150000	4160000	chr11	4600000	4610000	43	13.1833	17.733	21.5531	21.1201	3.24467	2.41687	1.99048	2.03109	4.30777	19	13.7291	19.7702	24.2113	20.2918	1.38115	0.961239	0.785641	0.936651	1.86472
all_loops_1347	chr11	4160000	4170000	chr11	4230000	4240000	157	70.8793	64.376	81.8006	68.3239	2.21332	2.43657	1.91818	2.29598	4.16126	141	67.1852	64.2892	82.4035	72.5508	2.09704	2.19136	1.71023	1.94217	4.07431
all_loops_1348	chr11	42810000	42820000	chr11	43160000	43170000	32	10.4039	9.98626	11.5718	8.81845	3.05601	3.18255	2.75022	3.59928	3.70608	22	8.72749	8.91877	9.10834	9.199	2.50354	2.45045	2.4	2.3766	2.53667
all_loops_1349	chr11	43300000	43310000	chr11	43420000	43430000	114	44.533	43.0776	52.8853	48.9421	2.55641	2.64258	2.15343	2.32657	3.68303	105	38.8672	35.1225	42.9674	35.6846	2.69714	2.98389	2.44036	2.93702	3.62457
all_loops_1350	chr11	43440000	43450000	chr11	43490000	43500000	77	37.5044	38.8129	37.4211	38.2289	2.05029	1.98135	2.05484	2.01154	2.3168	73	31.9156	33.7006	33.5365	32.2958	2.28326	2.16268	2.17324	2.25646	2.32463
all_loops_1351	chr11	43580000	43590000	chr11	44140000	44150000	126	36.8561	26.7656	35.2905	31.374	3.41216	4.69373	3.56311	4.00648	18.9745	132	38.3074	26.3845	36.423	33.9879	3.43944	4.98782	3.6169	3.87527	18.413
all_loops_1352	chr11	43590000	43600000	chr11	44020000	44030000	85	26.0361	26.0299	35.3859	23.8537	3.25603	3.2568	2.39814	3.55268	9.58702	55	23.2346	23.5006	31.8866	21.1753	2.3613	2.33468	1.72259	2.58986	6.43457
all_loops_1353	chr11	43600000	43610000	chr11	44260000	44270000	54	17.8345	19.0441	19.9343	25.6237	3.01654	2.82594	2.70037	2.10312	9.35051	28	14.5594	17.3251	17.5593	25.0017	1.91685	1.61261	1.59123	1.11944	4.62614
all_loops_1354	chr11	44420000	44430000	chr11	44820000	44830000	96	21.305	20.0079	22.91	27.3377	4.48961	4.77923	4.17645	3.50248	11.8425	80	20.4668	21.7843	25.3697	30.8012	3.89463	3.66015	3.14491	2.59213	9.42639
all_loops_1355	chr11	44580000	44590000	chr11	44820000	44830000	57	21.9631	21.4388	21.9961	26.1906	2.58803	2.65103	2.58416	2.17188	3.88399	27	21.2995	21.6605	22.0375	23.9528	1.26638	1.24538	1.22417	1.12669	1.80618
all_loops_1356	chr11	45560000	45570000	chr11	45690000	45700000	76	30.7213	26.0186	23.5311	42.2371	2.46907	2.91364	3.22034	1.79748	3.60482	56	28.991	24.9999	22.5141	38.1261	1.92843	2.23507	2.48076	1.46758	2.7395
all_loops_1357	chr11	45610000	45620000	chr11	45690000	45700000	131	49.9109	46.4732	63.0909	46.5653	2.62143	2.81492	2.07467	2.80937	3.53214	115	44.8658	43.2413	61.6332	47.9682	2.55973	2.65567	1.86448	2.39451	3.24586
all_loops_1358	chr11	45750000	45760000	chr11	46240000	46250000	34	8.92158	6.75443	6.81983	7.71768	3.77983	4.97489	4.92787	4.36191	5.17303	20	7.68016	6.45122	6.03575	7.6255	2.58349	3.06813	3.27588	2.60177	3.04103
all_loops_1359	chr11	45760000	45770000	chr11	46020000	46030000	42	16.2475	12.5634	13.4541	16.3618	2.57532	3.32453	3.10607	2.55743	3.96076	26	12.3173	9.78297	8.1346	11.1717	2.10191	2.64091	3.16955	2.31553	2.42034
all_loops_1360	chr11	4810000	4820000	chr11	4870000	4880000	181	56.496	54.9562	69.5485	62.5118	3.19987	3.28936	2.6002	2.89243	5.20498	152	52.7405	51.1705	62.6329	55.966	2.87848	2.96662	2.42457	2.71288	4.42474
all_loops_1361	chr11	48600000	48610000	chr11	48670000	48680000	271	98.215	71.1657	68.8723	106.47	2.75746	3.80407	3.93057	2.54386	3.93659	246	89.304	66.9022	68.0828	103.902	2.75267	3.67302	3.60941	2.36631	3.87857
all_loops_1362	chr11	48600000	48610000	chr11	48920000	48930000	87	25.7479	17.3931	18.2782	26.0178	3.36971	4.97911	4.73931	3.3349	8.33663	84	26.4359	17.931	18.4881	27.1696	3.16929	4.6642	4.52441	3.08402	8.3059
all_loops_1363	chr11	48610000	48620000	chr11	48900000	48910000	96	29.3801	32.6411	34.2551	45.6976	3.25983	2.93515	2.79725	2.09836	5.1053	105	27.9028	34.6079	38.8684	46.6909	3.7532	3.02813	2.69705	2.24616	5.61123
all_loops_1364	chr11	48670000	48680000	chr11	49080000	49090000	49	19.9685	17.5182	18.1903	22.3867	2.44663	2.78688	2.68448	2.18352	4.06311	31	16.9025	15.5157	16.3627	18.3024	1.82914	1.99158	1.88911	1.68999	2.65896
all_loops_1365	chr11	48680000	48690000	chr11	48900000	48910000	288	84.1127	61.3173	77.0017	94.4566	3.4211	4.69086	3.73662	3.04685	11.4796	218	82.8259	60.0961	77.2343	91.3457	2.63006	3.62316	2.82022	2.38502	8.67043
all_loops_1366	chr11	48800000	48810000	chr11	48880000	48890000	105	50.9719	56.9178	61.8793	64.8309	2.05788	1.84328	1.69573	1.61864	2.71367	104	44.892	54.1975	65.9398	65.4035	2.31375	1.91722	1.57632	1.58923	2.88994
all_loops_1367	chr11	48920000	48930000	chr11	49070000	49080000	54	16.5577	17.8635	18.6617	23.0791	3.24775	3.01167	2.88353	2.334	2.69643	40	13.2798	15.9802	14.6531	18.8405	2.99705	2.49375	2.71807	2.11715	2.11966
all_loops_1368	chr11	49000000	49010000	chr11	49080000	49090000	197	59.1659	45.9788	53.1526	46.602	3.32569	4.27746	3.70123	4.22038	5.63889	203	54.8687	44.0012	50.7734	47.497	3.69483	4.60531	3.99227	4.26708	6.16079
all_loops_1369	chr11	49000000	49010000	chr11	49220000	49230000	42	8.67127	13.3734	15.2763	17.2087	4.79976	3.12467	2.73797	2.4323	2.54161	34	8.72792	12.682	14.1444	15.071	3.86274	2.66781	2.39392	2.2477	2.04558
all_loops_1370	chr11	49460000	49470000	chr11	49650000	49660000	54	18.2496	24.7813	29.2293	30.3668	2.94829	2.17432	1.84457	1.7757	2.47451	65	17.6089	30.4478	34.9538	39.2981	3.67612	2.13109	1.85714	1.65236	2.87183
all_loops_1371	chr11	49530000	49540000	chr11	49680000	49690000	81	40.1378	36.0131	45.4536	38.1428	2.01552	2.24573	1.78032	2.12066	3.19661	99	45.5961	39.6972	41.2342	46.9952	2.16867	2.49012	2.39753	2.10425	3.57897
all_loops_1372	chr11	49540000	49550000	chr11	49650000	49660000	86	33.4475	33.3939	45.6339	34.5439	2.56651	2.57062	1.88263	2.48529	3.20796	78	35.0652	35.9308	46.8135	37.6825	2.22094	2.16759	1.66477	2.0671	2.79481
all_loops_1373	chr11	49800000	49810000	chr11	49940000	49950000	142	48.5862	37.5935	50.1189	44.0221	2.91869	3.76988	2.82961	3.22061	5.29807	111	39.3414	30.3204	36.7693	37.036	2.81684	3.65216	3.01335	2.99171	4.45066
all_loops_1374	chr11	5010000	5020000	chr11	5080000	5090000	104	50.6709	45.2456	54.1382	44.0984	2.05039	2.2957	1.91931	2.35529	3.15145	52	38.0874	34.7554	44.126	36.6048	1.36432	1.49475	1.17804	1.41943	1.85603
all_loops_1375	chr11	5010000	5020000	chr11	5150000	5160000	65	33.158	25.7354	35.2728	26.8166	1.95743	2.5198	1.84039	2.41859	3.49173	50	29.0253	24.4812	33.3436	26.0977	1.72016	2.03814	1.49804	1.91238	2.78541
all_loops_1376	chr11	5010000	5020000	chr11	5370000	5380000	66	19.9293	18.8538	23.1898	22.2334	3.30016	3.48743	2.83816	2.95969	6.18451	50	21.371	18.086	22.1329	21.244	2.33338	2.75487	2.25342	2.34726	4.93592
all_loops_1377	chr11	50130000	50140000	chr11	50180000	50190000	196	91.7976	80.8377	85.2237	92.5247	2.1339	2.42285	2.29831	2.11715	3.12826	129	81.0732	68.0829	68.6012	84.6781	1.59043	1.89344	1.87915	1.5228	2.1725
all_loops_1378	chr11	50250000	50260000	chr11	50580000	50590000	99	22.1358	17.1304	19.8776	22.6522	4.45678	5.75147	4.96054	4.35562	12.1917	63	17.8349	13.7923	14.8969	17.4927	3.51829	4.54209	4.20753	3.58672	8.25782
all_loops_1379	chr11	50370000	50380000	chr11	50580000	50590000	54	19.3812	19.01	19.6779	19.4212	2.77703	2.83098	2.73538	2.77135	5.19437	32	14.9384	15.3964	16.6691	18.3952	2.13454	2.07145	1.91423	1.73559	3.24507
all_loops_1380	chr11	50750000	50760000	chr11	50840000	50850000	74	25.8931	24.8005	25.4344	28.6493	2.85076	2.97584	2.90197	2.57746	3.14905	24	19.8558	19.7402	21.3045	20.9607	1.20767	1.21471	1.12593	1.14431	1.14047
all_loops_1381	chr11	50750000	50760000	chr11	51080000	51090000	34	10.9987	11.9153	14.7869	9.85807	3.07244	2.83804	2.2906	3.42436	4.30226	19	9.91417	11.5041	12.5056	10.5235	1.9073	1.64596	1.5152	1.79791	2.38847
all_loops_1382	chr11	50750000	50760000	chr11	51350000	51360000	34	12.1452	9.04243	11.0203	9.39283	2.78477	3.72986	3.06648	3.59219	8.63091	22	9.97185	7.99971	10.8591	8.11503	2.19423	2.72849	2.0166	2.69019	5.44886
all_loops_1383	chr11	5080000	5090000	chr11	5370000	5380000	63	15.8129	16.8081	16.6944	23.5931	3.96535	3.73195	3.75721	2.66322	6.53824	43	15.3527	15.8828	13.0957	21.8516	2.78915	2.69664	3.26623	1.96341	5.03008
all_loops_1384	chr11	51090000	51100000	chr11	51340000	51350000	69	24.2212	22.546	24.451	28.3444	2.84114	3.05131	2.81455	2.4293	5.59837	28	20.2695	20.1563	21.5072	22.2235	1.37951	1.38722	1.30049	1.25876	2.2054
all_loops_1385	chr11	51430000	51440000	chr11	51490000	51500000	232	60.9372	53.5816	69.4089	66.4002	3.8026	4.32364	3.33914	3.49022	5.86983	244	63.5184	54.6162	67.5038	68.0061	3.83694	4.4612	3.61074	3.58411	6.38389
all_loops_1386	chr11	51510000	51520000	chr11	51590000	51600000	110	61.3833	54.7772	60.0909	65.269	1.79073	2.0063	1.82918	1.68429	2.90032	87	65.7576	56.3027	61.1026	59.2985	1.32255	1.54425	1.42314	1.46637	2.23828
all_loops_1387	chr11	51630000	51640000	chr11	51780000	51790000	158	59.7379	49.3029	53.3165	67.936	2.64214	3.20021	2.95976	2.32377	7.10635	137	62.4835	51.6336	53.8384	73.1256	2.19067	2.65012	2.54179	1.8723	6.71195
all_loops_1388	chr11	51670000	51680000	chr11	51770000	51780000	143	53.0696	66.1592	75.925	91.2263	2.69139	2.1597	1.88228	1.56691	4.5956	152	63.51	73.7167	84.7854	97.7318	2.39114	2.06051	1.79183	1.55471	4.87824
all_loops_1389	chr11	51860000	51870000	chr11	52030000	52040000	72	30.837	31.9378	42.7272	39.9139	2.33054	2.25046	1.68351	1.80187	2.80434	58	31.5378	38.3162	48.5275	45.0011	1.83641	1.51238	1.1948	1.28822	2.33523
all_loops_1390	chr11	5190000	5200000	chr11	5370000	5380000	224	74.4802	57.0493	77.6143	62.5865	3.00482	3.92131	2.88364	3.57493	9.56416	200	68.6696	56.1497	76.6751	61.2725	2.90972	3.55735	2.60631	3.26042	9.38201
all_loops_1391	chr11	51950000	51960000	chr11	52030000	52040000	221	71.3265	63.0752	78.2784	72.2784	3.09549	3.49979	2.82093	3.05478	5.38936	173	65.4196	55.9872	74.7205	57.0861	2.64196	3.08627	2.31354	3.02696	4.53716
all_loops_1392	chr11	51960000	51970000	chr11	52150000	52160000	85	41.7933	34.323	44.06	40.5372	2.03135	2.47219	1.92708	2.09414	3.43856	86	48.7431	36.802	49.3991	44.5974	1.76279	2.33321	1.73943	1.92629	3.61219
all_loops_1393	chr11	52060000	52070000	chr11	52150000	52160000	207	67.2923	64.0442	81.7184	83.4178	3.07305	3.22866	2.53121	2.47971	4.89345	195	67.4439	65.1931	77.5228	83.968	2.88849	2.98806	2.51344	2.32074	4.77174
all_loops_1394	chr11	52220000	52230000	chr11	53070000	53080000	44	23.7988	17.1035	20.9199	20.0126	1.84528	2.56343	2.09802	2.19266	11.4975	47	23.5185	16.4407	21.7282	19.1008	1.9942	2.84752	2.15776	2.45302	10.2429
all_loops_1395	chr11	52230000	52240000	chr11	52840000	52850000	39	11.5383	9.32711	12.591	10.8278	3.35961	4.14761	3.08093	3.57803	10.5925	16	9.25078	7.3212	10.7968	7.22541	1.72178	2.16946	1.47749	2.19783	4.18097
all_loops_1396	chr11	5270000	5280000	chr11	5330000	5340000	140	60.212	70.6092	76.2172	86.2762	2.32292	1.98136	1.83576	1.62197	3.63181	95	62.0898	69.5048	69.487	81.1765	1.52919	1.36629	1.36663	1.17008	2.6169
all_loops_1397	chr11	53110000	53120000	chr11	53160000	53170000	230	123.324	104.72	120.88	109.391	1.86431	2.19518	1.90197	2.10155	3.0055	196	107.288	97.7666	109.983	99.2643	1.82609	2.00375	1.78139	1.97355	2.82503
all_loops_1398	chr11	53280000	53290000	chr11	53430000	53440000	133	37.262	32.3873	49.003	33.628	3.56244	4.09698	2.71063	3.94627	6.3799	103	43.4565	35.7313	54.0302	34.4858	2.36704	2.87737	1.90467	2.98099	4.76501
all_loops_1399	chr11	53570000	53580000	chr11	53660000	53670000	267	97.851	98.9755	103.382	127.688	2.72687	2.69592	2.58114	2.09018	5.08408	198	81.4479	89.4587	92.2208	120.617	2.42925	2.21196	2.14578	1.64102	4.21427
all_loops_1400	chr11	5380000	5390000	chr11	5430000	5440000	152	85.7191	64.2259	81.0248	64.4642	1.77233	2.36452	1.87489	2.35579	2.58264	123	85.1903	67.2128	83.3215	66.3577	1.44331	1.82878	1.47564	1.85231	2.20518
all_loops_1401	chr11	5380000	5390000	chr11	5590000	5600000	68	26.8789	26.9647	32.6036	36.7346	2.52419	2.51619	2.08234	1.84881	4.02152	53	23.7571	27.8888	35.7339	30.7252	2.22575	1.89719	1.48184	1.72262	3.29466
all_loops_1402	chr11	53810000	53820000	chr11	53860000	53870000	272	94.0968	92.4422	102.02	97.3547	2.88863	2.94028	2.66451	2.79207	4.06592	275	76.4203	78.5431	90.1267	78.3665	3.59513	3.49808	3.04899	3.50595	4.49721
all_loops_1403	chr11	53810000	53820000	chr11	53900000	53910000	188	57.4474	54.9957	95.1743	56.6696	3.26861	3.41406	1.9743	3.31339	4.87244	172	51.719	49.5722	85.1255	55.0284	3.32117	3.46472	2.01935	3.12181	4.93298
all_loops_1404	chr11	53810000	53820000	chr11	54060000	54070000	87	19.5949	24.2017	25.5217	33.8195	4.42248	3.58411	3.39946	2.56784	6.10443	67	19.5116	24.4412	25.0343	30.5497	3.42144	2.73418	2.66965	2.18926	4.89975
all_loops_1405	chr11	53950000	53960000	chr11	54060000	54070000	153	41.9599	40.0862	42.756	56.4371	3.64004	3.80977	3.57243	2.70796	6.54524	143	36.2493	36.6955	42.0377	52.2939	3.9368	3.88907	3.39601	2.73123	6.57972
all_loops_1406	chr11	54510000	54520000	chr11	54670000	54680000	235	62.3506	45.7339	55.5145	68.2574	3.76457	5.12939	4.22731	3.43928	8.57145	266	67.1639	48.561	55.895	72.7321	3.95606	5.46845	4.75221	3.65361	10.3224
all_loops_1407	chr11	54590000	54600000	chr11	54670000	54680000	168	95.6913	83.5394	85.7104	102.255	1.75486	2.00982	1.95897	1.64233	3.04198	155	104.042	89.6966	98.379	114.529	1.48931	1.72724	1.57496	1.35305	2.97307
all_loops_1408	chr11	54690000	54700000	chr11	54740000	54750000	279	120.392	93.7199	124.461	88.7146	2.31633	2.97485	2.24067	3.1425	3.55792	246	112.906	94.6393	129.317	92.5191	2.17776	2.59765	1.90161	2.65712	3.43383
all_loops_1409	chr11	54690000	54700000	chr11	54800000	54810000	124	48.6983	41.6256	53.621	66.6429	2.54312	2.9742	2.31008	1.85937	4.14624	111	52.7976	45.0739	59.0617	67.3032	2.10028	2.45938	1.87791	1.64829	3.9813
all_loops_1410	chr11	54740000	54750000	chr11	54790000	54800000	315	104.356	85.1743	94.2569	103.21	3.01657	3.69513	3.33945	3.05005	5.50937	313	111.983	93.0156	103.081	108	2.79348	3.36249	3.03447	2.89639	5.63691
all_loops_1411	chr11	54800000	54810000	chr11	54850000	54860000	128	65.5157	54.1467	58.8713	56.6867	1.95228	2.36143	2.17224	2.25581	3.10327	108	63.3469	50.4859	51.1736	57.5585	1.70379	2.13696	2.1083	1.87483	2.81091
all_loops_1412	chr11	54810000	54820000	chr11	54900000	54910000	83	34.5695	30.9026	41.2261	37.2156	2.39692	2.68042	2.01084	2.22695	2.90953	74	35.1674	30.6759	42.9464	39.8958	2.10109	2.40773	1.7214	1.85269	2.67734
all_loops_1413	chr11	5500000	5510000	chr11	7190000	7200000	16	0.121479	0.151066	0.431505	0.467878	72.6931	64.1265	30.2913	28.3511	16.7826	10	0.120181	0.141715	0.323706	0.463191	45.8713	41.7847	23.8373	17.9335	8.57085
all_loops_1414	chr11	55010000	55020000	chr11	55190000	55200000	149	39.3313	39.2491	44.2567	58.6015	3.78126	3.78916	3.36139	2.53997	7.42225	195	43.993	44.2978	50.0412	59.2993	4.42474	4.39436	3.89102	3.28455	9.25093
all_loops_1415	chr11	55010000	55020000	chr11	55250000	55260000	73	31.8451	22.1489	32.9251	25.1535	2.2883	3.28555	2.21347	2.89465	5.13053	70	32.4406	23.219	38.2247	29.4772	2.15423	3.00613	1.82911	2.37007	4.85927
all_loops_1416	chr11	55050000	55060000	chr11	55190000	55200000	87	25.1598	25.7599	25.2719	41.3785	3.44816	3.36814	3.43293	2.09988	6.07496	64	27.0553	29.4909	26.9622	46.4555	2.3605	2.16621	2.36861	1.37685	4.39494
all_loops_1417	chr11	55200000	55210000	chr11	55250000	55260000	256	69.1949	55.2831	64.1688	69.8666	3.6958	4.62416	3.98483	3.66032	5.11117	221	66.97	54.1301	65.2531	64.601	3.29656	4.07707	3.38316	3.41726	4.75701
all_loops_1418	chr11	55330000	55340000	chr11	55800000	55810000	54	16.5188	12.0747	12.2257	16.0923	3.25535	4.44364	4.3892	3.3411	8.71535	37	12.0954	8.3246	11.2519	8.81596	3.04214	4.40377	3.26818	4.16108	5.41548
all_loops_1419	chr11	55330000	55340000	chr11	55910000	55920000	43	11.1378	7.63032	8.81341	10.2653	3.83527	5.57545	4.83541	4.1581	10.2515	29	9.71837	6.59012	8.47069	9.13027	2.96383	4.3497	3.39529	3.15267	6.14497
all_loops_1420	chr11	55940000	55950000	chr11	57280000	57290000	21	5.7387	3.39701	4.11328	4.63453	3.61382	6.03372	5.00797	4.45662	27.6116	8	4.41149	2.73199	3.13794	3.21556	1.79542	2.86018	2.50159	2.44303	9.66428
all_loops_1421	chr11	57360000	57370000	chr11	57580000	57590000	67	22.5659	20.3856	24.3985	25.7985	2.96039	3.27547	2.73894	2.59089	6.5119	66	20.2717	20.9404	26.6923	25.4625	3.2447	3.14158	2.46712	2.58582	6.24865
all_loops_1422	chr11	57430000	57440000	chr11	57590000	57600000	46	16.339	14.8305	17.5133	15.1908	2.80432	3.08765	2.61734	3.01489	5.13997	44	18.4778	16.2628	20.0994	17.8941	2.3738	2.69514	2.18324	2.4508	4.91577
all_loops_1423	chr11	57630000	57640000	chr11	57740000	57750000	167	33.94	27.9481	31.7379	45.3429	4.90893	5.95761	5.24846	3.67714	8.08091	129	27.9303	24.4345	27.964	42.8723	4.60573	5.26199	4.60019	3.00426	6.96864
all_loops_1424	chr11	57690000	57700000	chr11	57740000	57750000	78	35.2928	37.9488	39.3052	42.0719	2.20666	2.05263	1.98197	1.85194	2.3276	71	34.6882	33.1845	35.1871	36.1086	2.0438	2.13613	2.0149	1.96362	2.35368
all_loops_1425	chr11	57760000	57770000	chr11	57870000	57880000	133	36.0214	31.6129	61.1503	28.3285	3.68479	4.19703	2.17305	4.68192	6.1397	93	31.5085	29.7936	51.7337	31.4025	2.94541	3.11438	1.79613	2.95532	4.4189
all_loops_1426	chr11	57770000	57780000	chr11	57820000	57830000	191	79.1137	73.1156	89.0755	67.7247	2.41246	2.6101	2.14297	2.81756	3.64148	126	63.2639	59.2138	66.5713	58.3572	1.99009	2.12598	1.89137	2.15713	2.59572
all_loops_1427	chr11	57980000	57990000	chr11	58030000	58040000	102	57.6932	43.0774	44.731	51.8539	1.76664	2.36466	2.27744	1.96521	2.53401	72	40.7575	32.7638	32.5115	41.7733	1.76467	2.19391	2.21088	1.72186	1.98945
all_loops_1428	chr11	57990000	58000000	chr11	58110000	58120000	41	14.1414	12.7443	18.4606	14.7344	2.88595	3.19985	2.21436	2.77059	2.70864	29	14.2918	11.9737	16.0874	12.5666	2.02199	2.4102	1.7977	2.29738	1.92483
all_loops_1429	chr11	58480000	58490000	chr11	58540000	58550000	43	8.53833	8.56774	8.96255	8.72459	4.98939	4.97246	4.75584	4.88408	5.25503	23	8.00928	7.35861	6.2005	6.87173	2.84859	3.09709	3.66637	3.31338	3.04689
all_loops_1430	chr11	5890000	5900000	chr11	6090000	6100000	111	43.6683	39.4588	47.4472	52.3549	2.53837	2.80848	2.33662	2.11801	6.31665	88	41.6448	36.5038	42.3698	45.9088	2.11044	2.40686	2.07442	1.91485	5.3758
all_loops_1431	chr11	5890000	5900000	chr11	6160000	6170000	51	22.9597	19.5066	24.1103	20.5732	2.21599	2.60627	2.11068	2.4718	4.687	33	22.4967	17.7278	20.7769	18.5585	1.46481	1.85665	1.58549	1.77399	3.00455
all_loops_1432	chr11	58910000	58920000	chr11	58990000	59000000	87	27.2417	25.7799	35.6561	26.8224	3.18562	3.36554	2.43594	3.23522	3.85113	52	26.0973	22.534	24.886	21.7513	1.98875	2.30185	2.08517	2.3843	2.32672
all_loops_1433	chr11	59040000	59050000	chr11	59110000	59120000	142	63.8847	49.8827	55.7007	50.5623	2.22084	2.84299	2.54656	2.80485	3.37198	127	50.4067	40.3668	49.1261	40.8732	2.5165	3.14085	2.58197	3.10203	3.31685
all_loops_1434	chr11	59040000	59050000	chr11	59280000	59290000	67	24.7549	24.126	30.4108	25.3235	2.69967	2.76975	2.19922	2.63929	3.49556	49	23.5293	25.53	28.9109	26.747	2.07793	1.91572	1.69247	1.82888	2.61894
all_loops_1435	chr11	59120000	59130000	chr11	59290000	59300000	154	43.2624	34.2704	43.4982	44.8552	3.55377	4.48351	3.53455	3.42786	8.41647	148	49.3486	37.2897	47.5498	48.6723	2.99503	3.96098	3.10809	3.03656	7.78236
all_loops_1436	chr11	5920000	5930000	chr11	6090000	6100000	82	30.1683	35.1925	32.8563	42.5301	2.71241	2.32628	2.49118	1.92587	5.37224	54	26.8453	31.5069	29.1787	37.8808	2.00777	1.71165	1.84776	1.42441	3.77274
all_loops_1437	chr11	59330000	59340000	chr11	59420000	59430000	141	47.2535	39.4009	56.1484	41.3217	2.97972	3.57207	2.50852	3.40643	4.64114	145	46.4343	40.6016	59.1226	41.6106	3.11813	3.56497	2.45008	3.47873	4.82159
all_loops_1438	chr11	59430000	59440000	chr11	59540000	59550000	175	61.563	61.5725	88.3911	73.4917	2.83963	2.83919	1.97873	2.37934	4.8891	152	64.9114	64.5126	88.5219	69.8709	2.33959	2.35403	1.71628	2.17376	4.43603
all_loops_1439	chr11	59690000	59700000	chr11	59830000	59840000	81	21.7074	26.6762	43.3099	25.1163	3.71892	3.02881	1.86824	3.21618	5.88955	66	23.1537	26.3473	37.9872	26.1966	2.84256	2.49931	1.73549	2.51364	5.08895
all_loops_1440	chr11	59690000	59700000	chr11	59880000	59890000	112	29.5212	26.8281	39.9536	29.6104	3.78445	4.16293	2.79875	3.77309	8.7254	70	30.3236	24.0039	34.7578	27.8408	2.30413	2.90824	2.01103	2.50888	6.03944
all_loops_1441	chr11	59770000	59780000	chr11	59830000	59840000	98	45.046	49.3879	52.0137	53.4907	2.17295	1.9823	1.88242	1.83054	3.00326	62	36.9807	45.1566	45.3276	50.7487	1.67472	1.37218	1.36701	1.22127	1.98877
all_loops_1442	chr11	59770000	59780000	chr11	59880000	59890000	114	39.993	38.326	50.2099	46.8243	2.84588	2.96935	2.26794	2.43158	4.65927	80	32.3693	33.495	41.1025	41.7511	2.46694	2.38428	1.94406	1.91393	3.57876
all_loops_1443	chr11	59910000	59920000	chr11	60000000	60010000	97	41.2357	33.8849	42.6769	35.233	2.34906	2.85715	2.26992	2.74814	4.44282	87	48.358	38.0704	46.0905	39.976	1.79743	2.28187	1.88567	2.17337	4.13774
all_loops_1444	chr11	60060000	60070000	chr11	60210000	60220000	92	42.585	42.4358	44.0422	60.685	2.15767	2.16524	2.08644	1.51518	3.8535	71	49.1796	46.2102	41.978	66.9967	1.44279	1.5353	1.68972	1.05966	2.89225
all_loops_1445	chr11	60160000	60170000	chr11	60220000	60230000	129	70.4166	59.79	55.622	70.9859	1.83078	2.15562	2.31686	1.81611	2.68915	124	68.3082	59.0141	55.4559	71.0441	1.81411	2.09933	2.23379	1.74435	2.54542
all_loops_1446	chr11	60510000	60520000	chr11	60640000	60650000	84	46.0284	36.3226	40.4227	46.3053	1.82317	2.30901	2.07538	1.81229	2.92153	85	41.4856	36.0847	44.4381	43.2629	2.04638	2.35182	1.91072	1.96251	3.05312
all_loops_1447	chr11	60740000	60750000	chr11	60900000	60910000	108	48.4723	40.226	35.3399	60.3253	2.22555	2.68065	3.05023	1.78899	4.92962	78	33.0754	31.9226	28.0016	46.1001	2.35415	2.4389	2.7792	1.69047	3.88425
all_loops_1448	chr11	60910000	60920000	chr11	61030000	61040000	41	17.3082	14.9727	19.4703	14.8263	2.36096	2.72678	2.10013	2.75353	2.78594	38	16.1482	14.2954	18.9554	15.3327	2.34487	2.64669	1.99943	2.46878	2.80983
all_loops_1449	chr11	61040000	61050000	chr11	61200000	61210000	94	31.9506	36.8079	41.9181	44.7357	2.93598	2.54959	2.23951	2.09877	5.12644	65	26.4088	34.2587	38.6976	41.8885	2.45578	1.89471	1.67794	1.55042	3.61743
all_loops_1450	chr11	61220000	61230000	chr11	61310000	61320000	139	56.2337	48.0492	53.2121	49.4944	2.46921	2.88894	2.60916	2.80475	3.6535	121	51.761	43.4333	45.9717	43.5988	2.33509	2.78178	2.62851	2.77124	3.2594
all_loops_1451	chr11	61220000	61230000	chr11	61430000	61440000	58	21.6948	23.0448	30.6394	25.5289	2.66578	2.51028	1.89008	2.26697	3.46716	62	18.6173	23.0819	32.3456	26.2333	3.31779	2.67881	1.91397	2.35824	3.74102
all_loops_1452	chr11	61320000	61330000	chr11	61420000	61430000	111	55.4223	49.3721	57.1434	57.0509	2.001	2.24571	1.94083	1.94398	3.56199	116	60.4001	51.8311	63.2611	60.4201	1.91901	2.23565	1.83235	1.91837	3.82951
all_loops_1453	chr11	61440000	61450000	chr11	61520000	61530000	98	27.7084	25.8256	29.208	33.6654	3.52771	3.7839	3.3472	2.90534	5.57877	72	25.8035	24.4709	26.4838	28.7972	2.78341	2.93436	2.71218	2.49506	4.05037
all_loops_1454	chr11	61600000	61610000	chr11	61720000	61730000	65	34.3439	28.5671	30.9078	38.1486	1.89003	2.2709	2.09947	1.70202	2.66951	59	34.0844	28.3485	29.9641	35.0574	1.72886	2.07744	1.9658	1.68101	2.38841
all_loops_1455	chr11	61760000	61770000	chr11	61850000	61860000	209	56.3737	47.9441	62.1589	52.1337	3.70261	4.35225	3.35855	4.00316	6.54291	249	54.6014	47.8913	63.0278	51.9483	4.55382	5.19052	3.94596	4.78594	7.90765
all_loops_1456	chr11	61760000	61770000	chr11	61940000	61950000	90	27.8033	31.6961	45.3664	32.8277	3.22901	2.83368	1.98168	2.7363	4.03273	79	30.785	35.4907	48.1328	34.4588	2.56111	2.22249	1.63996	2.28885	3.67086
all_loops_1457	chr11	61760000	61770000	chr11	62090000	62100000	88	31.1384	26.5363	31.529	29.3951	2.82024	3.30751	2.78542	2.98693	6.98585	98	38.4611	31.7434	31.701	38.7442	2.54402	3.0807	3.08481	2.52547	7.73531
all_loops_1458	chr11	61860000	61870000	chr11	61940000	61950000	260	116.294	98.0185	125.133	100.253	2.23465	2.65088	2.07693	2.59184	4.14705	194	109.478	97.2511	111.784	97.489	1.77134	1.99381	1.73483	1.98895	3.2668
all_loops_1459	chr11	61860000	61870000	chr11	62090000	62100000	215	51.8889	47.5853	57.2399	67.5711	4.13742	4.51083	3.75132	3.17861	8.41004	222	55.0032	52.3481	58.0398	69.8421	4.03062	4.23466	3.8201	3.17548	8.80338
all_loops_1460	chr11	61940000	61950000	chr11	62090000	62100000	181	74.6982	56.3397	58.6413	71.8618	2.42118	3.20873	3.08301	2.51661	5.93938	188	69.6855	57.5847	62.111	77.565	2.6954	3.26083	3.02358	2.42194	6.34835
all_loops_1461	chr11	62420000	62430000	chr11	62480000	62490000	178	58.2409	50.0055	69.9423	57.1105	3.05275	3.5545	2.54275	3.11307	3.88785	174	57.441	46.4432	58.1749	53.2447	3.02567	3.74061	2.98757	3.26368	3.72268
all_loops_1462	chr11	62550000	62560000	chr11	62940000	62950000	30	10.726	9.75435	12.1168	10.5186	2.78034	3.05449	2.46382	2.83466	4.28494	32	11.7877	11.6234	13.7496	11.8732	2.70027	2.73812	2.31776	2.68099	4.21275
all_loops_1463	chr11	62570000	62580000	chr11	62660000	62670000	95	30.3542	31.1065	34.2724	37.994	3.12272	3.04745	2.76676	2.49645	3.42309	85	31.1488	31.2573	34.6722	39.2969	2.72331	2.71388	2.44736	2.16007	3.06948
all_loops_1464	chr11	62710000	62720000	chr11	62950000	62960000	52	26.248	20.6239	24.988	24.6785	1.97738	2.51401	2.07669	2.10263	4.56322	47	21.9363	18.9754	20.438	21.8083	2.13739	2.46915	2.29331	2.14987	3.80745
all_loops_1465	chr11	62730000	62740000	chr11	62940000	62950000	62	17.9263	17.9484	22.1907	22.0182	3.44497	3.44075	2.78592	2.80764	6.02848	33	16.1292	16.8382	19.071	17.4442	2.03953	1.95417	1.72657	1.88667	2.98177
all_loops_1466	chr11	65000000	65010000	chr11	65470000	65480000	65	29.2932	26.8367	36.269	28.7089	2.2148	2.41678	1.78999	2.25972	7.59922	47	26.0589	30.1411	41.2945	30.7947	1.80053	1.55748	1.13783	1.52453	4.77179
all_loops_1467	chr11	65010000	65020000	chr11	65490000	65500000	74	24.1531	21.5843	25.5872	23.7042	3.05527	3.41722	2.88471	3.1129	10.5347	66	18.857	22.278	28.4523	26.0544	3.48683	2.95379	2.31505	2.5273	8.61254
all_loops_1468	chr11	65080000	65090000	chr11	65440000	65450000	76	22.849	26.6913	34.016	29.1775	3.31605	2.84047	2.23063	2.59927	7.59271	59	23.1672	25.7889	30.186	26.8305	2.54006	2.28284	1.9514	2.19454	5.47249
all_loops_1469	chr11	65080000	65090000	chr11	65490000	65500000	62	22.221	21.2365	25.4526	21.9369	2.78213	2.9105	2.43028	2.818	7.29198	51	23.3726	20.778	26.7171	24.3231	2.17701	2.44755	1.9055	2.09228	5.31232
all_loops_1470	chr11	6550000	6560000	chr11	6660000	6670000	61	23.1174	19.3981	27.1676	21.7301	2.63165	3.13363	2.24075	2.79889	3.15934	43	18.7433	14.9666	18.4183	12.7946	2.28728	2.86064	2.32743	3.34249	2.52516
all_loops_1471	chr11	65930000	65940000	chr11	66680000	66690000	36	7.47931	7.76858	9.18325	8.736	4.76297	4.58787	3.88872	4.08556	10.9645	15	5.8896	5.74024	5.85881	6.56236	2.52104	2.58551	2.53407	2.26646	4.04147
all_loops_1472	chr11	66710000	66720000	chr11	66830000	66840000	88	39.3454	29.0915	47.2212	24.0181	2.23347	3.018	1.86175	3.65286	3.0245	84	35.1259	26.2669	43.3118	23.9532	2.38745	3.18961	1.93726	3.49642	2.96725
all_loops_1473	chr11	66710000	66720000	chr11	66920000	66930000	43	17.4566	16.7565	22.8636	17.1532	2.45492	2.55688	1.87688	2.49809	2.24985	24	16.1909	16.8812	23.3062	18.151	1.47935	1.41922	1.02964	1.32048	1.29744
all_loops_1474	chr11	66840000	66850000	chr11	66890000	66900000	125	53.1183	48.0055	55.8527	57.3498	2.3507	2.60054	2.23582	2.17755	2.60027	110	50.1846	46.8998	55.5405	55.0619	2.18954	2.34256	1.97877	1.99594	2.23099
all_loops_1475	chr11	66920000	66930000	chr11	67160000	67170000	104	24.7352	19.7102	22.4139	23.05	4.19163	5.25486	4.6238	4.49675	6.27801	47	22.771	18.227	20.6281	21.1799	2.05938	2.56997	2.27228	2.21336	2.93955
all_loops_1476	chr11	67180000	67190000	chr11	67460000	67470000	66	20.9719	17.2408	19.3823	20.7617	3.13688	3.81183	3.39282	3.16848	7.13765	50	19.7617	20.1632	24.1616	22.6665	2.52245	2.47246	2.06499	2.2006	5.22052
all_loops_1477	chr11	67240000	67250000	chr11	67450000	67460000	54	21.5999	22.3949	24.5695	27.1764	2.4931	2.40499	2.19299	1.9834	4.72815	48	21.9011	23.5652	22.7025	28.5624	2.18626	2.03252	2.10942	1.67815	4.25867
all_loops_1478	chr11	67630000	67640000	chr11	67730000	67740000	156	78.4721	71.1225	98.1915	72.862	1.98671	2.19172	1.58813	2.13947	2.76497	187	78.9402	69.9588	101.332	71.8483	2.36715	2.67061	1.84458	2.60048	3.46609
all_loops_1479	chr11	67630000	67640000	chr11	67770000	67780000	102	55.0934	37.752	54.6112	40.6866	1.84986	2.69735	1.86616	2.50327	3.05228	98	51.4922	37.8707	55.0024	33.1418	1.90145	2.58357	1.78032	2.95111	3.11389
all_loops_1480	chr11	67810000	67820000	chr11	68220000	68230000	109	25.4676	20.4076	24.5039	32.0008	4.26712	5.31999	4.43426	3.39867	12.0381	91	22.8948	19.4967	25.1112	27.3273	3.96177	4.64874	3.61347	3.32151	9.87236
all_loops_1481	chr11	68020000	68030000	chr11	68210000	68220000	56	22.091	21.4683	21.6555	25.1741	2.52805	2.60103	2.57866	2.21966	4.20986	44	21.3608	20.1639	20.3204	25.5756	2.05491	2.17628	2.1596	1.71759	3.547
all_loops_1482	chr11	68290000	68300000	chr11	68610000	68620000	38	14.8814	11.9995	14.8275	13.5038	2.54316	3.14889	2.55233	2.80069	4.14907	22	13.8443	11.0493	12.5873	10.8643	1.58488	1.98219	1.7419	2.01563	2.44693
all_loops_1483	chr11	68380000	68390000	chr11	68610000	68620000	55	18.8122	17.4198	20.6855	22.58	2.91347	3.14501	2.65088	2.42945	4.36659	20	13.5276	12.8881	13.6167	13.4349	1.47495	1.54757	1.46536	1.48504	1.73822
all_loops_1484	chr11	68720000	68730000	chr11	68790000	68800000	154	64.4426	56.4255	64.0611	57.4327	2.38757	2.7262	2.40177	2.67847	3.8303	107	52.7503	46.5106	58.3109	51.1886	2.02648	2.29776	1.83356	2.08818	2.81517
all_loops_1485	chr11	69000000	69010000	chr11	69050000	69060000	208	50.0159	55.4041	57.3478	56.3347	4.15238	3.74927	3.62242	3.68745	5.11372	121	47.696	50.767	50.8571	52.9852	2.53369	2.38072	2.37651	2.28124	3.04296
all_loops_1486	chr11	69080000	69090000	chr11	69190000	69200000	211	54.5628	50.26	70.8208	65.7919	3.86186	4.19182	2.97656	3.20373	6.05768	156	51.1577	49.4894	69.916	57.9203	3.04539	3.14785	2.22949	2.69044	4.64075
all_loops_1487	chr11	69080000	69090000	chr11	69330000	69340000	74	33.8844	33.0988	37.6993	39.8405	2.18041	2.23201	1.96035	1.85526	4.08237	118	35.2212	41.03	49.7418	45.5818	3.3436	2.87138	2.3695	2.58527	6.44943
all_loops_1488	chr11	69240000	69250000	chr11	69330000	69340000	136	67.2558	63.3147	66.5238	82.8192	2.02061	2.14619	2.04281	1.64136	3.62451	123	59.6548	59.6385	61.1566	84.0268	2.06009	2.06065	2.00958	1.46327	3.37237
all_loops_1489	chr11	69490000	69500000	chr11	69560000	69570000	213	93.4393	81.2228	109.286	93.4067	2.27819	2.62042	1.94815	2.27898	4.07799	221	89.4583	82.3359	103.158	90.5175	2.46878	2.68208	2.14124	2.43993	4.43641
all_loops_1490	chr11	69490000	69500000	chr11	69660000	69670000	60	25.0158	27.0655	28.8532	29.6144	2.39292	2.21237	2.07577	2.02259	3.84787	47	31.1363	30.5334	34.9396	33.1851	1.50786	1.53754	1.34419	1.41505	3.03586
all_loops_1491	chr11	69620000	69630000	chr11	69680000	69690000	143	54.7975	65.6493	72.0378	76.3039	2.60668	2.17645	1.9837	1.87294	3.49273	115	52.9294	63.495	68.7991	70.7692	2.17049	1.80989	1.67056	1.62412	2.79045
all_loops_1492	chr11	69860000	69870000	chr11	70020000	70030000	131	59.5876	42.0172	47.9923	53.5959	2.19644	3.11274	2.72601	2.44153	6.20688	122	52.6733	39.8186	46.6453	53.7281	2.31367	3.05873	2.61203	2.26833	5.8543
all_loops_1493	chr11	70060000	70070000	chr11	70120000	70130000	150	55.2847	59.0204	71.7446	63.0322	2.71014	2.53889	2.08923	2.37755	3.76536	138	49.3047	57.0437	61.3185	58.1217	2.79528	2.41671	2.24851	2.37197	3.37824
all_loops_1494	chr11	70230000	70240000	chr11	70430000	70440000	55	20.3056	18.5197	27.2932	20.2186	2.70024	2.95923	2.01145	2.7118	3.50572	49	21.2698	18.7103	24.4918	21.0505	2.29763	2.61027	1.9966	2.32146	3.44361
all_loops_1495	chr11	70240000	70250000	chr11	70570000	70580000	44	11.1675	9.75164	13.1016	11.0625	3.91391	4.47641	3.34051	3.95071	3.52392	47	16.3042	13.8891	16.219	16.9788	2.87121	3.36692	2.8862	2.75781	3.82817
all_loops_1496	chr11	70260000	70270000	chr11	70310000	70320000	311	125.418	128.149	110.761	168.331	2.47853	2.42574	2.80621	1.84705	3.98611	288	105.517	113.333	101.66	145.779	2.72779	2.53982	2.83118	1.97493	4.05332
all_loops_1497	chr11	70350000	70360000	chr11	70410000	70420000	208	85.9067	99.1587	104.416	131.286	2.41958	2.09654	1.99108	1.58388	3.83425	273	91.5272	98.8882	105.24	120.392	2.98055	2.75891	2.59255	2.26654	5.20237
all_loops_1498	chr11	70830000	70840000	chr11	70950000	70960000	108	48.0076	36.9226	32.8406	58.5863	2.24705	2.91984	3.28167	1.842	3.26785	90	38.5996	29.575	25.8416	46.5523	2.32819	3.03622	3.47319	1.93131	3.00095
all_loops_1499	chr11	7100000	7110000	chr11	8140000	8150000	62	11.5628	16.277	27.7562	14.0051	5.32462	3.7919	2.22931	4.40266	26.7983	44	13.2212	16.64	23.9435	17.3465	3.31052	2.6344	1.83418	2.52773	16.8993
all_loops_1500	chr11	7100000	7110000	chr11	8200000	8210000	73	18.9778	20.2496	30.5451	19.7196	3.83167	3.59221	2.38537	3.68827	28.174	87	16.4093	19.2764	28.6509	20.1452	5.27581	4.49515	3.02947	4.30225	28.7833
all_loops_1501	chr11	7100000	7110000	chr11	8310000	8320000	39	11.7187	11.2264	15.6732	12.0345	3.30831	3.45211	2.47888	3.22222	17.9207	47	15.3049	11.8434	15.2487	13.0743	3.05747	3.9436	3.06867	3.57513	18.1683
all_loops_1502	chr11	7110000	7120000	chr11	7230000	7240000	48	23.0271	18.8222	23.4857	19.1201	2.07981	2.54199	2.03937	2.50259	2.72003	48	21.3056	18.8376	23.254	18.71	2.24707	2.53992	2.05961	2.55715	3.03145
all_loops_1503	chr11	71860000	71870000	chr11	71940000	71950000	99	50.6206	45.7209	59.8408	50.6691	1.95384	2.16277	1.6533	1.95197	3.06881	67	45.0755	43.4648	47.0478	45.2864	1.48532	1.54023	1.42318	1.47842	2.29848
all_loops_1504	chr11	72030000	72040000	chr11	72130000	72140000	80	39.1261	30.5419	38.9652	36.2155	2.04201	2.61407	2.05042	2.20567	3.53654	48	29.7833	26.3753	29.2561	31.3448	1.60959	1.81679	1.6385	1.52967	2.16519
all_loops_1505	chr11	72030000	72040000	chr11	72240000	72250000	72	28.2736	17.1559	25.7245	18.092	2.5411	4.17829	2.79192	3.96329	4.11989	101	30.406	17.876	25.8962	16.203	3.3141	5.62416	3.88903	6.20131	5.95033
all_loops_1506	chr11	72150000	72160000	chr11	72370000	72380000	44	14.8765	13.3517	15.4229	17.3537	2.94461	3.27839	2.84096	2.52668	2.49554	48	14.4991	13.6712	15.0586	18.5684	3.29472	3.49279	3.17311	2.57654	2.90646
all_loops_1507	chr11	72160000	72170000	chr11	72240000	72250000	249	84.6457	63.3361	84.0768	62.2373	2.93938	3.92679	2.95925	3.996	5.58043	169	70.3551	55.1914	71.0732	52.1233	2.40011	3.05834	2.37589	3.23802	4.12209
all_loops_1508	chr11	72390000	72400000	chr11	72530000	72540000	179	71.1444	61.9333	89.7254	69.2651	2.51388	2.88716	1.99387	2.58199	5.26324	180	78.3176	65.898	97.1647	68.5102	2.29668	2.72887	1.85165	2.62497	5.57416
all_loops_1509	chr11	72740000	72750000	chr11	72810000	72820000	151	51.434	48.9138	64.1396	54.5699	2.93205	3.08281	2.35213	2.76386	4.68069	127	40.5849	41.601	54.689	49.149	3.12401	3.04789	2.31981	2.58076	4.3371
all_loops_1510	chr11	72950000	72960000	chr11	74180000	74190000	57	7.49219	9.50735	9.40446	17.2324	7.52089	5.94337	6.00771	3.29442	25.8622	43	10.8327	13.2883	12.0634	22.2301	3.9423	3.21922	3.54343	1.93013	17.1563
all_loops_1511	chr11	73090000	73100000	chr11	74180000	74190000	64	12.4582	14.2021	13.0756	22.5454	5.10424	4.48186	4.86506	2.8306	20.139	49	13.0787	14.4818	14.8409	21.2178	3.72572	3.3672	3.28628	2.30324	14.2008
all_loops_1512	chr11	74210000	74220000	chr11	74340000	74350000	129	38.0987	33.2697	42.3451	43.3791	3.37969	3.86878	3.04158	2.96924	5.93604	131	43.0331	35.5299	42.5735	47.68	3.03943	3.6795	3.07216	2.74383	6.35078
all_loops_1513	chr11	74790000	74800000	chr11	74980000	74990000	147	53.1195	43.5689	49.742	59.7641	2.76403	3.36853	2.95133	2.45723	8.06371	133	46.2189	40.3056	44.43	50.329	2.87356	3.2941	2.98899	2.63935	8.05071
all_loops_1514	chr11	75000000	75010000	chr11	75100000	75110000	233	70.9474	62.5701	94.8922	74.8799	3.28091	3.71948	2.45388	3.10883	5.91221	198	63.2977	59.2695	79.3388	76.5137	3.12472	3.33673	2.49374	2.5857	6.0729
all_loops_1515	chr11	75040000	75050000	chr11	75100000	75110000	165	81.7859	86.9823	79.6153	109.678	2.01622	1.89591	2.07112	1.50395	3.23931	136	71.7946	79.9971	77.7789	100.941	1.89305	1.69919	1.74758	1.34698	3.02845
all_loops_1516	chr11	75210000	75220000	chr11	75310000	75320000	110	39.4282	41.0873	50.9369	52.058	2.78535	2.67315	2.15726	2.11089	3.36671	74	37.5667	41.604	49.9129	47.2514	1.96725	1.77681	1.48162	1.5649	2.52834
all_loops_1517	chr11	75340000	75350000	chr11	75390000	75400000	241	100.731	85.601	105.343	90.9504	2.39114	2.81327	2.28654	2.64799	4.17813	230	96.2833	86.4092	103.154	91.1753	2.38734	2.65983	2.22849	2.52095	4.43001
all_loops_1518	chr11	75520000	75530000	chr11	75780000	75790000	49	23.0302	17.7388	19.1174	23.6246	2.12277	2.75243	2.55498	2.06958	3.44997	34	18.7141	14.3359	14.1323	20.8181	1.81247	2.36216	2.39596	1.63017	2.50099
all_loops_1519	chr11	75580000	75590000	chr11	75970000	75980000	44	17.5377	15.5781	20.3432	16.9337	2.50033	2.81284	2.1572	2.58898	4.72551	35	20.251	18.742	22.7982	19.97	1.72473	1.86286	1.53287	1.74888	3.71988
all_loops_1520	chr11	75590000	75600000	chr11	75780000	75790000	127	35.8793	31.9792	44.0107	35.0226	3.53258	3.96207	2.88139	3.61875	8.68878	109	34.8055	30.8495	43.9468	36.0393	3.12558	3.5251	2.47691	3.01887	7.81727
all_loops_1521	chr11	75720000	75730000	chr11	75770000	75780000	136	66.372	66.385	67.7532	71.8196	2.04748	2.04708	2.0058	1.89239	2.73328	113	60.9575	67.8384	67.7968	69.233	1.85235	1.66474	1.66576	1.63126	2.42642
all_loops_1522	chr11	75900000	75910000	chr11	75970000	75980000	127	64.4528	62.692	63.7805	75.6965	1.96893	2.02414	1.98965	1.67686	3.19294	118	60.7762	61.7682	59.7668	74.3952	1.94	1.9089	1.97271	1.58534	2.98011
all_loops_1523	chr11	76060000	76070000	chr11	76210000	76220000	266	61.823	48.9015	59.4666	69.5927	4.29727	5.43045	4.46727	3.81819	10.3282	263	56.3386	47.7577	56.8039	64.1344	4.66171	5.49754	4.62358	4.09594	10.8279
all_loops_1524	chr11	76260000	76270000	chr11	76310000	76320000	139	66.113	54.7099	59.2602	61.5948	2.1008	2.53786	2.34332	2.25465	3.24411	124	67.8091	55.1502	60.5492	59.2209	1.82744	2.24615	2.04619	2.09201	3.15131
all_loops_1525	chr11	76350000	76360000	chr11	76450000	76460000	146	42.2527	45.1466	48.5604	59.5808	3.4496	3.22897	3.00244	2.44802	5.64608	142	41.6408	46.0723	54.251	60.3141	3.40434	3.0776	2.61449	2.3521	5.64085
all_loops_1526	chr11	76620000	76630000	chr11	76700000	76710000	167	67.4347	75.5186	76.6247	99.009	2.47429	2.20977	2.17792	1.68602	3.94371	148	64.456	71.4076	77.1699	93.7106	2.29413	2.07111	1.91666	1.57871	3.70768
all_loops_1527	chr11	76810000	76820000	chr11	76880000	76890000	130	54.0568	57.4798	75.1559	58.3802	2.40229	2.25947	1.72877	2.22469	3.61013	82	46.7143	50.0045	56.2153	52.9226	1.75374	1.63857	1.45786	1.5484	2.38412
all_loops_1528	chr11	76820000	76830000	chr11	77120000	77130000	43	17.2503	16.4278	18.898	17.307	2.4841	2.60772	2.26866	2.47602	4.37623	23	22.925	21.2694	21.119	24.2769	1.00326	1.08098	1.08865	0.947618	2.16846
all_loops_1529	chr11	76910000	76920000	chr11	77020000	77030000	121	58.1438	54.3412	66.2981	55.3046	2.07919	2.22442	1.82385	2.18574	3.38369	96	59.2019	58.7541	68.9491	59.4309	1.62052	1.63285	1.39176	1.61429	2.70655
all_loops_1530	chr11	76910000	76920000	chr11	77120000	77130000	216	57.3947	46.9442	59.9391	56.8303	3.75861	4.59355	3.59932	3.79587	10.3766	239	58.611	52.4469	61.5018	59.0204	4.07249	4.55022	3.88138	4.04429	11.2717
all_loops_1531	chr11	76910000	76920000	chr11	77250000	77260000	91	32.7102	30.72	39.9906	34.2322	2.77657	2.95587	2.27235	2.65348	7.36894	99	39.1498	35.6709	46.8563	39.6886	2.52486	2.77041	2.11047	2.49066	7.85571
all_loops_1532	chr11	77020000	77030000	chr11	77120000	77130000	231	85.5703	82.0455	82.6719	84.6669	2.69755	2.8133	2.79201	2.7263	4.95576	198	85.3544	87.2779	95.4266	92.5606	2.3182	2.26716	2.07377	2.13791	4.26739
all_loops_1533	chr11	77020000	77030000	chr11	77250000	77260000	104	39.3734	41.5694	42.3647	53.0924	2.63722	2.49823	2.45145	1.95705	4.83955	93	42.994	45.5582	46.9057	54.2693	2.16039	2.03906	1.98061	1.71236	4.35722
all_loops_1534	chr11	77130000	77140000	chr11	77260000	77270000	187	64.833	56.7012	66.833	66.7593	2.88143	3.29394	2.79533	2.79841	5.74568	147	66.571	55.9682	64.8005	60.5481	2.20636	2.62359	2.26655	2.42547	4.84535
all_loops_1535	chr11	77550000	77560000	chr11	77780000	77790000	53	16.5016	17.9504	21.491	22.5144	3.1985	2.94176	2.45935	2.34806	3.71067	48	20.2507	21.5689	26.4314	25.9531	2.36356	2.21977	1.81294	1.84623	3.3594
all_loops_1536	chr11	77640000	77650000	chr11	77770000	77780000	142	51.394	40.8367	41.8241	71.8734	2.75955	3.47122	3.38946	1.97434	6.44097	134	56.1489	44.402	45.6789	70.1028	2.38405	3.01335	2.9293	1.91018	6.69064
all_loops_1537	chr11	77690000	77700000	chr11	77770000	77780000	131	64.2946	61.1056	54.2858	87.2306	2.03589	2.14196	2.41055	1.50119	4.5289	109	59.7979	61.673	57.1623	91.7441	1.82143	1.76614	1.90527	1.18788	4.31389
all_loops_1538	chr11	77870000	77880000	chr11	77960000	77970000	170	69.729	66.9212	75.4754	81.7631	2.43595	2.538	2.25073	2.07786	5.37387	204	75.3987	75.0495	78.8247	91.6945	2.70336	2.71592	2.58601	2.22344	6.59976
all_loops_1539	chr11	78160000	78170000	chr11	78210000	78220000	211	96.9877	81.8602	82.1466	95.3749	2.17432	2.57564	2.56667	2.21105	4.01277	205	96.2728	83.285	87.5643	91.3631	2.12819	2.45967	2.33961	2.24243	4.15423
all_loops_1540	chr11	78160000	78170000	chr11	78260000	78270000	118	54.507	46.6462	70.7783	46.3473	2.16273	2.52641	1.66624	2.54267	3.84287	119	56.8533	47.6542	67.6848	48.314	2.09119	2.49402	1.75703	2.46003	4.31061
all_loops_1541	chr11	78400000	78410000	chr11	78640000	78650000	77	28.9538	28.1683	29.2854	42.3908	2.6537	2.72743	2.62375	1.81451	6.15243	43	23.9304	23.3809	22.5303	32.3243	1.79356	1.83554	1.90452	1.32925	3.35343
all_loops_1542	chr11	78660000	78670000	chr11	78740000	78750000	123	47.2266	49.0346	68.6162	40.2847	2.60107	2.50536	1.79143	3.04819	4.62469	78	41.7634	44.4948	55.6405	43.547	1.86559	1.75132	1.40114	1.78936	2.9075
all_loops_1543	chr11	78830000	78840000	chr11	79100000	79110000	74	27.803	29.8345	35.5965	34.193	2.65563	2.47541	2.07583	2.16079	4.97697	71	23.5968	26.3938	31.0866	31.6158	3.00041	2.68365	2.27983	2.24178	5.33414
all_loops_1544	chr11	78840000	78850000	chr11	79020000	79030000	176	47.9096	41.8271	53.0547	54.1839	3.66802	4.20015	3.31297	3.24406	9.51376	185	43.2983	40.4805	48.7844	56.3407	4.26514	4.5613	3.78649	3.27955	10.2833
all_loops_1545	chr11	79030000	79040000	chr11	79100000	79110000	222	63.0958	56.7945	64.147	77.7974	3.51447	3.90372	3.45697	2.85119	5.1679	130	51.4658	48.59	58.15	57.3114	2.52299	2.672	2.23347	2.2661	3.55363
all_loops_1546	chr11	79050000	79060000	chr11	79210000	79220000	64	24.199	23.1497	30.2368	30.7434	2.63797	2.75703	2.11294	2.07824	3.00542	63	28.7663	26.1511	39.5482	29.3411	2.18594	2.40371	1.5915	2.14326	3.00209
all_loops_1547	chr11	79390000	79400000	chr11	79500000	79510000	147	52.8187	37.9907	35.6746	69.2174	2.77974	3.86183	4.11185	2.12212	5.72592	155	44.19	33.3362	35.3664	56.3972	3.50192	4.63868	4.37315	2.74527	6.37046
all_loops_1548	chr11	79430000	79440000	chr11	79500000	79510000	188	74.1885	67.725	68.3936	94.4448	2.53202	2.77331	2.74624	1.98953	4.93254	126	52.422	52.6113	55.8741	68.3772	2.4009	2.39228	2.25283	1.84149	3.7265
all_loops_1549	chr11	79430000	79440000	chr11	79730000	79740000	59	17.4809	20.6534	22.5186	27.9481	3.36161	2.84772	2.61289	2.1071	5.88326	47	21.1738	21.9608	22.219	31.6287	2.21399	2.13501	2.11031	1.48446	4.95687
all_loops_1550	chr11	79520000	79530000	chr11	79600000	79610000	140	61.8592	54.7006	68.2838	58.1866	2.26116	2.55654	2.04873	2.40364	3.8807	105	47.4372	45.0063	59.4016	42.218	2.2109	2.33005	1.76634	2.48358	3.4551
all_loops_1551	chr11	79520000	79530000	chr11	79720000	79730000	157	45.3544	40.5677	57.1687	50.8463	3.45621	3.86302	2.74321	3.08364	8.69359	127	40.2413	38.1413	47.9455	50.4973	3.15062	3.32363	2.64541	2.51199	7.62742
all_loops_1552	chr11	79610000	79620000	chr11	79720000	79730000	92	40.4083	40.6536	46.1235	55.4267	2.27361	2.25992	1.99249	1.65866	3.92944	63	33.9603	35.6513	37.1966	48.0959	1.8526	1.76497	1.69184	1.30924	2.65502
all_loops_1553	chr11	80090000	80100000	chr11	80160000	80170000	145	64.3795	58.4356	54.6386	76.5775	2.25033	2.47883	2.65078	1.89234	3.62926	111	55.3872	49.6477	49.3576	59.5635	2.00226	2.23327	2.24637	1.86211	2.75974
all_loops_1554	chr11	80240000	80250000	chr11	80480000	80490000	70	28.0493	19.1218	19.7645	37.3192	2.49029	3.6469	3.52891	1.87337	5.1798	49	27.8126	19.6047	20.8957	33.1886	1.75906	2.4918	2.33858	1.47498	3.74809
all_loops_1555	chr11	80290000	80300000	chr11	80480000	80490000	55	19.0788	16.9856	16.5585	27.3524	2.87296	3.22494	3.30761	2.00711	5.07721	40	17.5958	15.9547	17.4249	21.0651	2.26607	2.49772	2.28817	1.89463	3.76421
all_loops_1556	chr11	80500000	80510000	chr11	80620000	80630000	170	76.5256	62.7533	100.441	62.9801	2.21988	2.7063	1.69185	2.69657	3.88707	166	84.5835	62.7115	98.1144	59.8056	1.96142	2.64442	1.6912	2.7727	3.71946
all_loops_1557	chr11	80520000	80530000	chr11	80580000	80590000	167	79.0636	88.8249	101.046	83.5595	2.11082	1.87911	1.65206	1.99738	2.79524	151	76.3838	90.2681	104.489	88.5732	1.97558	1.67205	1.4447	1.70401	2.53599
all_loops_1558	chr11	81190000	81200000	chr11	81270000	81280000	100	44.6221	46.096	48.8124	56.3325	2.23827	2.16685	2.04651	1.7738	2.70815	94	48.7725	46.3421	58.3164	50.9557	1.92542	2.02618	1.61085	1.84309	2.56212
all_loops_1559	chr11	81800000	81810000	chr11	81990000	82000000	129	28.9704	25.1204	29.3184	42.5311	4.44094	5.11887	4.38841	3.02831	7.7497	94	30.782	24.7566	27.8427	43.9221	3.04708	3.78572	3.36761	2.13756	5.61855
all_loops_1560	chr11	81810000	81820000	chr11	81860000	81870000	155	76.991	63.6188	87.6317	57.4134	2.01191	2.43413	1.76789	2.69676	2.37567	109	72.2771	65.2467	88.2271	54.0436	1.50738	1.66956	1.23518	2.01501	1.75566
all_loops_1561	chr11	81860000	81870000	chr11	81990000	82000000	172	56.5966	48.2692	48.9403	73.1065	3.03545	3.55805	3.50936	2.35088	5.00482	179	57.5179	46.6226	49.7368	71.6492	3.10841	3.83326	3.59373	2.49619	5.30246
all_loops_1562	chr11	82040000	82050000	chr11	82700000	82710000	41	9.55006	8.97885	14.6859	10.798	4.25904	4.527	2.77967	3.77132	9.26109	65	9.68251	10.5112	15.7628	13.2141	6.65474	6.13503	4.10394	4.88956	12.8506
all_loops_1563	chr11	82420000	82430000	chr11	82700000	82710000	52	7.41575	7.3015	8.98708	8.44273	6.93211	7.03912	5.73342	6.09875	5.95451	36	7.5011	8.49241	9.73076	9.25252	4.74931	4.20138	3.67215	3.85992	3.94737
all_loops_1564	chr11	82590000	82600000	chr11	82680000	82690000	106	44.3428	48.6543	47.0642	61.1443	2.38734	2.17622	2.24959	1.73241	3.00134	76	54.1742	54.6423	52.9272	61.7963	1.40214	1.39015	1.43511	1.22948	2.03784
all_loops_1565	chr11	82720000	82730000	chr11	83000000	83010000	88	34.3484	26.8304	29.3255	29.9563	2.55744	3.27139	2.994	2.93116	5.70094	86	30.5315	26.222	32.8465	27.3525	2.81083	3.27103	2.61332	3.13633	5.36226
all_loops_1566	chr11	82870000	82880000	chr11	82920000	82930000	143	60.5405	66.9557	85.341	59.3074	2.35981	2.13405	1.67484	2.40879	3.02852	140	60.8777	64.7398	51.3852	67.4891	2.29756	2.16071	2.72117	2.07282	2.9499
all_loops_1567	chr11	83160000	83170000	chr11	83230000	83240000	145	66.2231	65.8033	74.6447	83.5807	2.18777	2.20171	1.94128	1.73397	3.22152	114	69.8746	65.8378	73.1294	77.1291	1.63059	1.73042	1.55812	1.47742	2.5967
all_loops_1568	chr11	8320000	8330000	chr11	8410000	8420000	110	51.1476	41.5749	51.0974	49.0977	2.14839	2.64188	2.1505	2.23791	2.90898	94	53.9203	43.8386	52.0232	50.432	1.74194	2.14162	1.80534	1.86218	2.66625
all_loops_1569	chr11	8320000	8330000	chr11	8760000	8770000	38	13.1641	12.6347	15.5268	13.3019	2.87241	2.99183	2.43812	2.84288	5.64012	33	12.939	12.7615	16.7004	15.5576	2.53855	2.57358	1.9702	2.11399	4.97213
all_loops_1570	chr11	83370000	83380000	chr11	83430000	83440000	217	98.3323	97.4138	115.295	112.817	2.20558	2.22635	1.88136	1.92266	3.40672	162	85.6415	88.6639	101.324	86.9247	1.89057	1.82619	1.59824	1.86269	2.90518
all_loops_1571	chr11	83370000	83380000	chr11	83540000	83550000	140	37.6831	40.4222	48.8461	52.5449	3.708	3.45736	2.86233	2.66123	6.94322	139	38.9191	40.7061	49.3262	54.85	3.56492	3.4088	2.8143	2.53139	7.7215
all_loops_1572	chr11	83450000	83460000	chr11	83540000	83550000	116	52.2089	47.9743	49.9309	63.8818	2.21951	2.41501	2.32057	1.81458	4.09648	95	46.4451	44.8891	44.4628	64.6321	2.04318	2.11384	2.13407	1.46913	3.54728
all_loops_1573	chr11	83590000	83600000	chr11	83840000	83850000	67	23.1242	20.5015	38.048	18.1743	2.88923	3.25705	1.75894	3.67182	5.60843	57	26.6616	23.1347	41.0479	20.1597	2.13365	2.45753	1.38768	2.81841	4.42702
all_loops_1574	chr11	83610000	83620000	chr11	83750000	83760000	225	76.1204	73.9716	94.7718	91.9518	2.95328	3.03895	2.37268	2.44536	6.6348	192	90.3411	79.1561	101.814	91.7536	2.12403	2.42379	1.88492	2.09137	6.06725
all_loops_1575	chr11	83630000	83640000	chr11	83740000	83750000	202	69.0063	84.4942	82.1036	120.672	2.92448	2.38905	2.45853	1.6734	5.19722	220	76.4585	86.3832	87.6923	118.388	2.87493	2.545	2.50705	1.85757	6.20352
all_loops_1576	chr11	83660000	83670000	chr11	83750000	83760000	146	60.2877	65.8736	62.8558	95.3154	2.41937	2.21452	2.32068	1.5312	4.04484	102	65.7056	72.7859	67.4543	98.6016	1.55154	1.40082	1.51138	1.03443	2.99825
all_loops_1577	chr11	83990000	84000000	chr11	84050000	84060000	116	57.2534	55.6179	54.7725	64.9587	2.02429	2.08371	2.11581	1.78454	2.67806	105	51.897	52.1228	53.7183	61.294	2.02127	2.01253	1.95287	1.71189	2.52103
all_loops_1578	chr11	84080000	84090000	chr11	84620000	84630000	38	13.7825	13.2871	12.9175	18.3963	2.74447	2.84602	2.92682	2.05987	6.55468	34	14.696	15.7235	16.0056	21.6677	2.30467	2.15502	2.11727	1.56654	5.10504
all_loops_1579	chr11	84240000	84250000	chr11	84610000	84620000	92	25.3756	26.3176	25.4374	42.6371	3.61522	3.48631	3.60647	2.15504	10.3362	83	17.1916	24.1647	22.2431	38.9648	4.80579	3.42472	3.71928	2.12723	8.96747
all_loops_1580	chr11	8430000	8440000	chr11	8750000	8760000	115	35.9922	32.1026	36.5689	42.2826	3.18905	3.57425	3.1389	2.71574	9.47888	78	40.5814	34.2227	35.7403	47.5144	1.9198	2.27546	2.17911	1.64026	6.19151
all_loops_1581	chr11	8430000	8440000	chr11	8840000	8850000	57	20.0645	21.7013	25.2676	26.4723	2.83171	2.61911	2.2509	2.14885	6.28939	41	20.1287	22.4996	29.2632	25.318	2.03177	1.81862	1.39971	1.61696	4.27206
all_loops_1582	chr11	84730000	84740000	chr11	84790000	84800000	125	59.6465	56.5796	62.841	55.9115	2.09385	2.20714	1.98758	2.23347	2.97396	118	59.2832	53.6263	62.7277	51.3275	1.98878	2.19818	1.87974	2.29644	2.70308
all_loops_1583	chr11	85000000	85010000	chr11	85140000	85150000	67	28.7694	27.8088	26.4403	37.8941	2.32426	2.40426	2.52823	1.76606	3.56567	48	27.6217	28.3369	25.2733	38.0676	1.7351	1.69147	1.8957	1.26023	2.60013
all_loops_1584	chr11	85190000	85200000	chr11	85640000	85650000	43	17.1299	15.1047	17.2404	17.3795	2.50146	2.83466	2.48553	2.46574	5.30847	42	18.6165	15.5383	20.0152	17.9365	2.24935	2.6921	2.09295	2.33416	5.10565
all_loops_1585	chr11	85330000	85340000	chr11	85630000	85640000	97	28.8764	28.2107	29.8442	39.8985	3.351	3.4298	3.24269	2.42759	9.74859	94	27.3072	27.6152	31.2253	34.6824	3.43341	3.39525	3.00396	2.70539	9.60589
all_loops_1586	chr11	85660000	85670000	chr11	85780000	85790000	174	44.8554	37.8973	49.8639	40.8374	3.87273	4.5819	3.48452	4.25284	6.13446	117	38.474	34.0787	37.5201	34.7368	3.03572	3.42611	3.1127	3.36139	4.2793
all_loops_1587	chr11	85660000	85670000	chr11	85980000	85990000	119	26.9045	19.3738	28.0886	22.0309	4.41038	6.11592	4.22512	5.38162	10.0868	81	25.0897	19.7093	26.6476	22.9418	3.21956	4.09403	3.03205	3.51969	6.60158
all_loops_1588	chr11	85840000	85850000	chr11	85980000	85990000	110	49.3053	45.1461	43.3013	60.9679	2.2285	2.43336	2.53679	1.80291	3.47775	78	42.1246	41.4591	41.2383	53.9912	1.84963	1.87925	1.88929	1.44386	2.37662
all_loops_1589	chr11	86120000	86130000	chr11	86170000	86180000	173	85.8017	93.4639	106.895	77.864	2.01509	1.85007	1.61783	2.22025	2.99089	152	88.8364	93.8731	100.754	86.9551	1.71021	1.61855	1.50811	1.74717	2.77641
all_loops_1590	chr11	86380000	86390000	chr11	86460000	86470000	300	101.208	82.9714	82.8304	103.028	2.96226	3.61256	3.6187	2.90998	8.35374	254	109.362	86.9133	88.6128	104.128	2.32135	2.92024	2.8643	2.43792	7.36519
all_loops_1591	chr11	86380000	86390000	chr11	86700000	86710000	36	6.75229	7.5775	9.7755	6.48661	5.26831	4.70205	3.65551	5.48082	5.52688	31	8.14612	8.66545	13.116	8.36126	3.77147	3.54802	2.3532	3.67557	4.92332
all_loops_1592	chr11	86380000	86390000	chr11	86820000	86830000	69	8.13228	13.6341	18.4967	16.8728	8.39378	5.03127	3.71572	4.07122	10.5008	68	10.2221	15.0108	20.0377	18.0853	6.59748	4.50671	3.38172	3.74478	9.94551
all_loops_1593	chr11	86470000	86480000	chr11	86820000	86830000	48	12.0252	12.3715	12.4365	18.5367	3.96693	3.85679	3.83679	2.58093	5.82265	46	15.3014	14.5975	13.6963	20.9639	2.99324	3.13659	3.34147	2.18858	5.16996
all_loops_1594	chr11	86710000	86720000	chr11	86800000	86810000	232	99.9023	93.3912	121.822	108.944	2.32095	2.48259	1.90368	2.1285	4.4437	238	100.731	99.2338	128.765	124.259	2.36137	2.39697	1.84767	1.91461	4.86883
all_loops_1595	chr11	87020000	87030000	chr11	87200000	87210000	152	52.606	40.2944	43.8205	55.6737	2.88582	3.76537	3.46308	2.72709	7.55876	122	44.1186	36.7267	40.9978	51.36	2.76128	3.31553	2.97096	2.37272	6.09803
all_loops_1596	chr11	87020000	87030000	chr11	87310000	87320000	64	16.5791	17.8531	23.9208	23.0324	3.84313	3.57041	2.66852	2.77101	4.69774	50	16.5535	17.0478	22.1341	21.3103	3.00838	2.92165	2.2533	2.34	3.59768
all_loops_1597	chr11	87240000	87250000	chr11	87330000	87340000	201	81.2888	75.937	91.2755	93.3527	2.47086	2.64477	2.20081	2.15189	3.37469	151	69.3608	67.7814	77.0728	89.2487	2.17533	2.22594	1.95794	1.69113	2.64849
all_loops_1598	chr11	87470000	87480000	chr11	87540000	87550000	205	88.9679	88.9368	124.667	97.3724	2.30274	2.30354	1.64387	2.10419	3.89599	181	91.2906	86.9905	115.368	101.222	1.9816	2.07945	1.5684	1.78738	3.5499
all_loops_1599	chr11	87470000	87480000	chr11	87580000	87590000	192	59.5513	55.5413	83.1624	55.8588	3.22038	3.45247	2.30716	3.43288	5.49958	173	58.7963	53.1916	78.8857	52.2757	2.93906	3.24817	2.19154	3.30497	5.01597
all_loops_1600	chr11	87780000	87790000	chr11	88010000	88020000	77	13.7427	12.0708	19.7245	15.9482	5.56972	6.33481	3.88913	4.80427	7.20618	102	11.1635	13.086	18.8099	17.176	9.06468	7.74307	5.39928	5.90993	9.68358
all_loops_1601	chr11	87790000	87800000	chr11	87860000	87870000	146	55.9958	45.9768	55.5289	41.9972	2.60447	3.17079	2.62633	3.47054	4.24767	115	47.264	41.5156	56.7149	37.3626	2.43012	2.76579	2.02588	3.0724	3.21156
all_loops_1602	chr11	87870000	87880000	chr11	88000000	88010000	278	77.2703	47.1926	51.3121	60.7313	3.5944	5.88041	5.40924	4.57166	10.9862	250	82.7431	50.5515	58.2144	63.3283	3.01896	4.93766	4.28882	3.94304	10.246
all_loops_1603	chr11	87870000	87880000	chr11	88680000	88690000	42	5.47922	8.46715	8.26116	11.2712	7.54585	4.91412	5.03519	3.70234	10.8215	35	4.8114	11.3218	9.90077	15.2806	7.14664	3.07308	3.50973	2.28209	8.23859
all_loops_1604	chr11	87910000	87920000	chr11	87970000	87980000	126	52.6613	64.8988	63.2631	69.8802	2.39001	1.94004	1.99012	1.80194	4.22867	121	56.4615	73.0617	78.0792	79.9878	2.14103	1.65524	1.549	1.51209	4.1741
all_loops_1605	chr11	88030000	88040000	chr11	88680000	88690000	63	28.3837	14.8358	16.2881	25.0752	2.21531	4.22474	3.85035	2.50644	20.7435	55	25.743	14.553	18.2201	23.5369	2.1321	3.76033	3.00763	2.3311	16.4634
all_loops_1606	chr11	88060000	88070000	chr11	88680000	88690000	62	25.0045	17.6447	16.9709	30.5252	2.47366	3.49964	3.63777	2.02774	21.3696	54	26.8721	20.2039	18.1664	33.2098	2.00578	2.66451	2.96172	1.62414	15.5036
all_loops_1607	chr11	8880000	8890000	chr11	9030000	9040000	119	26.0812	22.0576	25.3075	28.2056	4.54907	5.37513	4.6876	4.20764	7.33697	112	27.8076	22.7751	23.7136	31.1072	4.01682	4.90052	4.70739	3.59212	7.23781
all_loops_1608	chr11	88840000	88850000	chr11	88890000	88900000	86	39.4381	36.7786	38.8496	41.4676	2.17765	2.33468	2.21055	2.07133	2.67271	73	44.6471	39.6309	38.5931	47.7193	1.63363	1.83988	1.88923	1.52867	2.20172
all_loops_1609	chr11	88960000	88970000	chr11	89580000	89590000	34	10.8735	7.65999	7.54031	8.0734	3.10747	4.39434	4.46317	4.17207	10.6598	27	9.55012	7.64637	8.59648	8.52406	2.80826	3.49841	3.1162	3.14237	7.50869
all_loops_1610	chr11	89020000	89030000	chr11	89580000	89590000	52	10.6808	13.5796	12.3458	17.1655	4.83267	3.80859	4.18615	3.01757	11.6316	26	7.56234	10.5839	10.9695	12.0971	3.40627	2.44293	2.35782	2.13986	5.27019
all_loops_1611	chr11	89850000	89860000	chr11	90020000	90030000	106	29.2377	29.2922	30.5704	43.0296	3.6165	3.6098	3.45936	2.46003	5.46808	93	27.7476	27.0911	28.0922	37.111	3.34319	3.42391	3.30233	2.50195	4.77329
all_loops_1612	chr11	90040000	90050000	chr11	90470000	90480000	50	12.1512	9.60182	12.6535	13.1836	4.08941	5.16398	3.92834	3.77157	8.22909	41	13.5132	10.4761	13.885	13.7792	3.01912	3.88612	2.93887	2.96127	5.96311
all_loops_1613	chr11	90180000	90190000	chr11	90470000	90480000	55	19.2707	20.6251	21.4013	28.9194	2.8445	2.65861	2.56263	1.89873	4.61275	24	13.5592	14.1947	16.3921	17.9881	1.76438	1.68594	1.4613	1.33237	1.86668
all_loops_1614	chr11	93830000	93840000	chr11	93940000	93950000	130	40.0592	35.6343	44.933	44.9684	3.23961	3.64075	2.88899	2.88672	5.58371	124	47.6388	41.507	53.6521	53.5567	2.59957	2.98267	2.30875	2.31285	5.49059
all_loops_1615	chr11	93990000	94000000	chr11	94080000	94090000	281	102.853	83.4308	94.7974	83.6807	2.73036	3.36522	2.96214	3.35519	6.00585	256	93.4741	83.7467	93.6927	83.8787	2.73687	3.05438	2.73049	3.04958	6.10861
all_loops_1616	chr11	93990000	94000000	chr11	94130000	94140000	160	51.7046	49.8698	92.5189	48.9471	3.09046	3.20394	1.72859	3.26421	5.18927	167	54.1094	52.9879	88.8297	58.0393	3.08249	3.14761	1.87901	2.87413	5.94832
all_loops_1617	chr11	93990000	94000000	chr11	94350000	94360000	40	13.5037	14.2426	18.287	14.5056	2.94774	2.79586	2.18088	2.74552	2.90754	42	22.5962	20.2832	23.3008	19.6259	1.85494	2.06543	1.79908	2.13425	3.15762
all_loops_1618	chr11	94090000	94100000	chr11	94350000	94360000	39	15.754	14.2144	16.9646	17.802	2.46625	2.73152	2.29129	2.18412	3.98336	44	21.019	20.9292	22.7699	21.9237	2.08817	2.09708	1.9283	2.00239	4.68896
all_loops_1619	chr11	94190000	94200000	chr11	94260000	94270000	178	75.1386	66.0022	70.1716	82.0703	2.36714	2.69431	2.53445	2.16745	4.18473	159	75.9299	67.591	69.7366	74.1108	2.0926	2.35038	2.27818	2.14389	4.2072
all_loops_1620	chr11	94190000	94200000	chr11	94340000	94350000	181	47.7615	47.7524	59.8946	63.6259	3.78383	3.78455	3.01861	2.84186	7.05128	175	46.398	49.7754	55.3005	63.3002	3.76575	3.51075	3.16062	2.76182	7.29684
all_loops_1621	chr11	94190000	94200000	chr11	94400000	94410000	99	36.6318	32.5781	45.7015	38.0815	2.69794	3.03261	2.16368	2.5955	5.9566	93	37.7497	33.7785	40.2939	42.7372	2.45973	2.74805	2.3048	2.17334	6.03144
all_loops_1622	chr11	94280000	94290000	chr11	94340000	94350000	135	66.4358	69.0787	88.5455	65.3409	2.03049	1.95291	1.52405	2.06446	3.17681	113	64.2638	69.2234	84.6039	71.7143	1.7572	1.63148	1.33524	1.57489	2.78625
all_loops_1623	chr11	94350000	94360000	chr11	94400000	94410000	154	79.9445	69.742	76.3162	72.9466	1.92518	2.20641	2.01659	2.10961	2.88938	137	70.342	62.9675	67.2119	66.0083	1.94628	2.17386	2.03679	2.07387	2.85366
all_loops_1624	chr11	94730000	94740000	chr11	94790000	94800000	136	40.2563	39.7729	51.8149	39.4878	3.37246	3.41334	2.6216	3.43793	5.26942	114	38.0371	38.7161	48.0664	41.9218	2.99184	2.9395	2.36887	2.71526	4.36156
all_loops_1625	chr11	94920000	94930000	chr11	94970000	94980000	128	72.1229	55.7959	55.3314	61.813	1.77368	2.29176	2.31096	2.06903	2.77051	124	76.984	60.8345	68.0625	66.4222	1.60993	2.03661	1.82065	1.86554	2.86421
all_loops_1626	chr11	94980000	94990000	chr11	95090000	95100000	205	52.2112	45.3093	58.9027	55.4174	3.92076	4.51669	3.47611	3.69434	8.06204	188	48.5259	42.3118	54.5486	54.8361	3.86831	4.43509	3.44199	3.42398	7.58892
all_loops_1627	chr11	95120000	95130000	chr11	95380000	95390000	67	22.6637	17.8978	17.3808	29.175	2.94768	3.72823	3.83851	2.29206	5.03423	40	19.839	14.3669	14.6644	22.6799	2.01114	2.77185	2.71599	1.76032	3.1994
all_loops_1628	chr11	95250000	95260000	chr11	95380000	95390000	194	70.055	51.7829	64.1897	58.4088	2.76673	3.74112	3.01915	3.31745	7.52191	183	55.9049	45.2424	57.7161	47.2363	3.26935	4.03816	3.16694	3.86807	7.64442
all_loops_1629	chr11	95390000	95400000	chr11	95510000	95520000	133	39.284	29.1949	31.4712	39.5679	3.37955	4.54346	4.21586	3.35536	6.20537	107	29.7604	24.8253	30.2063	30.8456	3.58669	4.29684	3.53392	3.46091	5.43172
all_loops_1630	chr11	95540000	95550000	chr11	95610000	95620000	237	61.596	59.0517	74.8159	75.7434	3.84304	4.00834	3.16488	3.12618	6.10531	232	59.4163	57.0696	72.567	69.6793	3.89977	4.05985	3.19402	3.3262	5.94031
all_loops_1631	chr11	95730000	95740000	chr11	95940000	95950000	54	17.8171	17.9	28.0195	15.6325	3.01945	3.00555	1.92393	3.43875	4.77402	56	12.9532	17.4029	21.5968	19.6052	4.29779	3.20519	2.58564	2.84696	4.9717
all_loops_1632	chr11	95840000	95850000	chr11	95890000	95900000	206	114.71	96.5005	109.27	104.274	1.79513	2.13353	1.88442	1.97464	3.11457	166	92.3432	86.7297	93.0571	83.804	1.79678	1.91294	1.78301	1.97964	2.69451
all_loops_1633	chr11	95950000	95960000	chr11	96090000	96100000	134	44.907	37.5984	39.0111	64.7597	2.97954	3.55718	3.42869	2.06754	5.28471	140	44.42	36.2785	39.215	62.8116	3.1469	3.85117	3.56353	2.22693	5.59663
all_loops_1634	chr11	96000000	96010000	chr11	96090000	96100000	215	57.0101	57.8768	74.6972	79.0132	3.76641	3.71011	2.87578	2.71889	6.19533	196	48.6373	52.5222	66.5821	67.6669	4.02362	3.72656	2.94082	2.89374	5.68837
all_loops_1635	chr11	96130000	96140000	chr11	96480000	96490000	52	21.6873	16.8409	24.5823	16.3174	2.3913	3.07541	2.11083	3.17345	8.29176	37	15.0078	13.4874	18.9635	11.9999	2.45569	2.73048	1.94612	3.06614	6.32886
all_loops_1636	chr11	96170000	96180000	chr11	96410000	96420000	141	51.0919	59.7022	60.1284	80.6821	2.7563	2.35945	2.34275	1.74667	6.93539	143	44.2382	52.5139	47.3523	70.0921	3.22746	2.71981	3.01566	2.03869	7.17576
all_loops_1637	chr11	96650000	96660000	chr11	96710000	96720000	159	72.8645	69.5473	79.5633	92.4505	2.18051	2.28437	1.99715	1.71906	3.25794	129	69.9015	69.1651	77.7974	88.534	1.84425	1.86385	1.65731	1.45655	2.77926
all_loops_1638	chr11	96720000	96730000	chr11	96820000	96830000	84	38.4029	36.344	42.572	46.4961	2.18425	2.30765	1.97085	1.80487	2.65131	69	23.6563	27.4696	28.506	37.0866	2.9087	2.50638	2.41558	1.8582	2.46327
all_loops_1639	chr11	96770000	96780000	chr11	96820000	96830000	206	113.158	84.091	95.8133	105.151	1.81974	2.448	2.14882	1.95817	3.84736	183	100.176	71.1875	92.9577	85.3693	1.82597	2.56847	1.9676	2.14229	3.64583
all_loops_1640	chr11	96840000	96850000	chr11	96890000	96900000	184	70.2479	57.0658	73.4254	59.6661	2.61699	3.22045	2.5039	3.08034	3.95887	172	68.591	60.864	70.1518	62.1099	2.50542	2.82298	2.44976	2.76644	3.58623
all_loops_1641	chr11	96930000	96940000	chr11	97000000	97010000	180	74.2669	75.4759	83.7964	100.185	2.42178	2.38303	2.1467	1.79588	4.45108	173	64.4848	65.7356	78.8694	80.3674	2.6802	2.62928	2.19199	2.15118	4.37873
all_loops_1642	chr11	97210000	97220000	chr11	97260000	97270000	146	67.4539	52.039	57.5132	56.1512	2.16272	2.80213	2.53588	2.59728	3.97586	121	60.6827	49.3281	56.5657	53.7733	1.99234	2.45003	2.1371	2.24787	3.46093
all_loops_1643	chr11	97270000	97280000	chr11	97330000	97340000	161	75.0966	67.8188	77.3571	78.9176	2.14238	2.37195	2.07986	2.03879	3.94222	166	83.5702	75.0688	97.9646	81.2369	1.98517	2.20969	1.69378	2.04212	4.00362
all_loops_1644	chr11	97390000	97400000	chr11	97480000	97490000	141	47.4664	50.5646	60.1881	69.2458	2.96638	2.78498	2.34043	2.03473	5.346	124	43.9176	47.4066	54.5248	63.0153	2.81933	2.61227	2.27186	1.96624	4.93059
all_loops_1645	chr11	97500000	97510000	chr11	97550000	97560000	129	52.2931	39.9323	47.8567	48.0255	2.46407	3.2249	2.69201	2.68257	4.41386	89	51.7198	40.0472	44.4967	51.2929	1.71942	2.21933	1.9979	1.7337	3.1179
all_loops_1646	chr11	97650000	97660000	chr11	97740000	97750000	144	49.3024	43.7534	53.4755	60.7576	2.91686	3.28595	2.68966	2.36782	5.10663	145	46.5162	42.0127	53.1954	53.1735	3.11265	3.44552	2.72256	2.72368	5.51179
all_loops_1647	chr11	97650000	97660000	chr11	97840000	97850000	53	13.9428	16.1615	18.9564	20.5199	3.78129	3.26538	2.78646	2.57518	4.43555	57	16.9034	17.556	20.4509	22.4218	3.35816	3.23403	2.77847	2.53533	4.91502
all_loops_1648	chr11	97750000	97760000	chr11	97840000	97850000	116	51.8145	48.6452	55.9812	66.4543	2.23637	2.38177	2.07021	1.74444	4.32215	147	53.5277	50.3498	55.0896	60.394	2.74299	2.91577	2.66536	2.43165	5.58458
all_loops_1649	chr11	97790000	97800000	chr11	97840000	97850000	176	63.8709	82.5575	74.0252	89.2143	2.75281	2.13048	2.37571	1.97169	4.0716	118	63.4209	86.3137	71.7552	92.751	1.85923	1.36668	1.64358	1.27193	2.67218
all_loops_1650	chr11	97890000	97900000	chr11	97940000	97950000	138	57.0283	52.9334	59.2749	54.4527	2.41737	2.60402	2.3259	2.5315	3.81208	125	57.8079	56.5183	61.1125	60.0975	2.16033	2.20953	2.0437	2.07816	3.53343
all_loops_1651	chr11	98120000	98130000	chr11	98200000	98210000	209	76.9668	69.2674	89.2726	80.8088	2.71323	3.01438	2.33964	2.58439	5.35335	129	59.1228	54.8418	70.4838	52.261	2.1799	2.34976	1.82903	2.46558	3.62107
all_loops_1652	chr11	98120000	98130000	chr11	98310000	98320000	52	21.5177	20.9459	24.3085	23.3308	2.41007	2.47554	2.1345	2.22357	3.29446	76	25.8445	26.0928	30.4718	28.6153	2.93318	2.90538	2.48922	2.65016	4.69429
all_loops_1653	chr11	98200000	98210000	chr11	98250000	98260000	121	65.809	58.7924	58.6259	67.1281	1.83738	2.05629	2.06212	1.80133	3.01117	108	62.0727	57.6191	65.2174	57.9862	1.7387	1.87286	1.65499	1.86103	2.8936
all_loops_1654	chr11	98200000	98210000	chr11	98310000	98320000	84	38.3794	34.0051	34.2598	45.9755	2.18559	2.46591	2.44763	1.82526	3.52122	105	40.9079	38.7285	38.3096	49.16	2.56292	2.70677	2.7363	2.13358	4.55139
all_loops_1655	chr11	98460000	98470000	chr11	98510000	98520000	98	43.8615	48.0837	47.0437	54.8857	2.2315	2.03596	2.08087	1.7841	2.70283	86	38.5089	41.3378	40.959	47.2931	2.23006	2.07781	2.09698	1.81672	2.37459
all_loops_1656	chr11	98560000	98570000	chr11	98640000	98650000	158	82.2199	71.198	85.4186	74.5418	1.92056	2.21746	1.84872	2.11812	4.18223	158	89.5335	75.9562	93.9681	88.5819	1.76385	2.07873	1.6807	1.78278	4.23438
all_loops_1657	chr11	98780000	98790000	chr11	98830000	98840000	254	97.2656	74.5622	92.2469	81.1042	2.60975	3.40333	2.75158	3.12915	4.77086	232	96.91	72.4086	89.4211	76.4457	2.39254	3.201	2.59269	3.03217	4.67794
all_loops_1658	chr11	98780000	98790000	chr11	98890000	98900000	114	34.6304	35.9365	58.3779	39.2418	3.2853	3.16623	1.95116	2.90023	4.23902	86	31.7606	35.8827	58.5737	41.1244	2.7024	2.39281	1.46744	2.08857	3.37567
all_loops_1659	chr11	98900000	98910000	chr11	98970000	98980000	184	85.1046	91.3185	108.213	114.008	2.16068	2.01382	1.6997	1.61338	3.85563	194	84.1858	88.5	95.5969	116.574	2.30288	2.19075	2.02828	1.66362	4.21339
all_loops_1660	chr11	99050000	99060000	chr11	99160000	99170000	36	12.0336	12.0414	14.9868	13.4018	2.9752	2.97331	2.39282	2.67373	3.63233	13	9.77948	9.9306	10.5771	9.43029	1.32598	1.306	1.22692	1.37456	1.31062
all_loops_1661	chr11	99240000	99250000	chr11	99320000	99330000	136	65.1996	47.7632	51.7448	79.9277	2.08424	2.84352	2.62514	1.70066	3.32157	107	60.9395	43.306	46.5456	67.6906	1.7546	2.4674	2.29603	1.57987	2.93467
all_loops_1662	chr11	99270000	99280000	chr11	99320000	99330000	254	98.1324	87.4721	82.6797	105.389	2.58672	2.90161	3.06959	2.40879	3.78317	238	94.5876	75.6244	75.7006	93.7272	2.51458	3.1443	3.14113	2.53764	3.9921
all_loops_1663	chr11	99270000	99280000	chr11	99430000	99440000	72	20.2865	25.0093	24.392	37.0927	3.53666	2.87145	2.94382	1.93855	3.51478	56	20.8562	23.5192	23.8396	37.0048	2.67701	2.37518	2.3434	1.51193	2.7805
all_loops_1664	chr11	99270000	99280000	chr11	99860000	99870000	65	15.921	22.7396	23.9192	37.2627	4.06343	2.85031	2.71034	1.74238	10.2474	90	15.3602	24.1868	25.2853	37.9987	5.82788	3.70983	3.5493	2.36491	13.2922
all_loops_1665	chr11	99320000	99330000	chr11	100030000	100040000	59	14.8518	13.9703	14.0169	17.9745	3.95271	4.20034	4.18647	3.2698	17.447	67	15.3072	15.4276	18.2099	21.5935	4.35511	4.32133	3.66468	3.09309	19.1225
all_loops_1666	chr11	99320000	99330000	chr11	100140000	100150000	94	14.8018	21.1036	18.6205	36.2071	6.31466	4.43793	5.02658	2.59178	19.9062	105	17.0324	24.3458	20.4957	46.2065	6.13457	4.29931	5.103	2.26966	21.0519
all_loops_1667	chr11	99320000	99330000	chr11	99860000	99870000	108	18.5738	21.1589	21.3049	31.7812	5.78886	5.08493	5.05023	3.39072	16.0161	77	18.041	22.1715	23.4025	34.2638	4.25004	3.46183	3.28051	2.24364	11.1524
all_loops_1668	chr11	99330000	99340000	chr11	99430000	99440000	113	50.8397	41.1443	49.3467	51.3773	2.22027	2.74219	2.28731	2.19709	3.90883	120	50.8019	41.6851	52.1254	49.5873	2.35944	2.87423	2.29965	2.41711	4.07544
all_loops_1669	chr11	99430000	99440000	chr11	100140000	100150000	39	16.1608	14.0233	12.9623	17.6229	2.40456	2.76848	2.99335	2.20618	8.67291	43	21.0179	17.0269	14.2464	22.1433	2.04092	2.51651	3.00424	1.93766	8.49999
all_loops_1670	chr11	99430000	99440000	chr11	99860000	99870000	57	22.1428	21.7767	20.4529	27.2786	2.56713	2.61009	2.7782	2.08557	8.26816	46	21.5792	22.531	21.6043	27.4829	2.12646	2.03703	2.124	1.67133	6.13486
all_loops_1671	chr11	99920000	99930000	chr11	100020000	100030000	77	26.1071	25.9647	29.3034	23.149	2.94195	2.95803	2.62214	3.31627	4.7066	68	26.6835	25.0496	29.7427	21.2188	2.54261	2.7078	2.28197	3.19436	4.35245
all_loops_1672	chr11	99920000	99930000	chr11	100150000	100160000	85	30.185	26.1155	25.3716	30.4006	2.80997	3.24617	3.34097	2.79011	4.85884	81	27.4592	25.6373	22.5311	34.7153	2.94275	3.15107	3.58357	2.32943	4.53794
all_loops_1673	chr12	101200000	101210000	chr12	101340000	101350000	36	14.9871	12.2509	12.8318	15.3674	2.39277	2.92286	2.79158	2.33394	3.73652	21	12.0193	9.7059	9.5253	12.3547	1.74102	2.15177	2.19214	1.69414	2.43389
all_loops_1674	chr12	101400000	101410000	chr12	101710000	101720000	56	20.0258	19.4555	19.6505	26.9504	2.78747	2.86875	2.84044	2.07391	7.27905	33	19.3954	19.244	22.5025	26.5457	1.69783	1.71113	1.46444	1.24223	4.20852
all_loops_1675	chr12	101440000	101450000	chr12	101570000	101580000	107	25.1953	25.4176	30.7771	32.1853	4.23399	4.1971	3.46859	3.3173	8.05048	110	30.0893	29.2283	40.1842	36.0576	3.64699	3.75406	2.73308	3.04501	7.55588
all_loops_1676	chr12	101840000	101850000	chr12	102080000	102090000	54	24.2526	24.3372	24.316	29.6737	2.22153	2.21384	2.21576	1.81704	5.38089	44	24.5718	25.1998	25.8516	32.8614	1.78746	1.74309	1.69932	1.33793	4.35722
all_loops_1677	chr12	102010000	102020000	chr12	102070000	102080000	54	26.2554	26.8937	25.9988	30.7307	2.05271	2.00417	2.0729	1.75475	2.62725	42	26.9601	26.1396	25.6485	28.967	1.55579	1.60445	1.63505	1.44838	2.34391
all_loops_1678	chr12	102080000	102090000	chr12	102160000	102170000	57	27.0495	20.6916	19.9312	21.783	2.10317	2.7463	2.85055	2.60934	2.91534	31	26.964	21.9188	20.519	27.743	1.14913	1.41243	1.50832	1.11698	1.68401
all_loops_1679	chr12	102190000	102200000	chr12	102260000	102270000	108	32.8218	28.6284	33.4664	37.1713	3.28354	3.76283	3.22048	2.90036	5.60577	98	32.6398	30.6643	38.6058	39.7317	2.99635	3.18876	2.5345	2.46286	5.373
all_loops_1680	chr12	10230000	10240000	chr12	10440000	10450000	32	10.6772	10.1778	10.1824	10.6345	2.97851	3.12324	3.12184	2.99035	3.51885	18	9.54426	9.89729	10.2647	9.90392	1.87676	1.81049	1.74631	1.80929	2.04119
all_loops_1681	chr12	102350000	102360000	chr12	102590000	102600000	46	11.6875	11.1325	13.0936	12.7409	3.91093	4.10415	3.49412	3.5901	6.10182	17	10.9366	10.1525	11.2577	11.227	1.54939	1.66788	1.50558	1.50966	2.22284
all_loops_1682	chr12	103630000	103640000	chr12	103690000	103700000	72	28.7098	23.752	25.1796	30.5538	2.50262	3.02281	2.8521	2.35208	3.66995	75	26.9163	24.4056	24.5001	34.7871	2.7798	3.06461	3.05284	2.15266	3.85387
all_loops_1683	chr12	103760000	103770000	chr12	103810000	103820000	122	54.5811	54.7367	55.9944	58.6921	2.23295	2.22661	2.17669	2.07681	3.18509	98	52.7648	51.61	51.4345	54.0039	1.85568	1.89712	1.90358	1.81318	2.88481
all_loops_1684	chr12	103810000	103820000	chr12	103950000	103960000	70	21.9845	17.6341	15.9007	23.5674	3.17417	3.95284	4.38105	2.96188	6.67765	40	25.4873	21.4946	23.988	25.0052	1.56719	1.85695	1.66473	1.59728	3.72739
all_loops_1685	chr12	10390000	10400000	chr12	10590000	10600000	24	7.31398	5.70569	5.9904	6.54444	3.25061	4.1511	3.95705	3.62709	3.72666	8	7.18582	5.3004	6.34794	5.67825	1.11175	1.49989	1.25622	1.40181	1.31498
all_loops_1686	chr12	104120000	104130000	chr12	104300000	104310000	49	15.013	11.6898	12.7191	14.1553	3.24886	4.16462	3.83022	3.44434	5.34485	22	12.2597	10.4857	10.973	12.1986	1.78807	2.08771	1.99585	1.79696	2.50152
all_loops_1687	chr12	104380000	104390000	chr12	104580000	104590000	35	9.63093	9.18914	12.3716	9.85194	3.60705	3.77861	2.81438	3.52695	5.79352	20	7.52653	6.56926	7.22656	6.63194	2.63554	3.01383	2.74344	2.98577	3.57253
all_loops_1688	chr12	104660000	104670000	chr12	104730000	104740000	140	39.7972	34.4844	40.8908	39.8575	3.51152	4.05096	3.41784	3.50623	4.2323	112	35.5829	34.7499	30.878	47.9898	3.14156	3.21665	3.6187	2.33106	3.43002
all_loops_1689	chr12	104780000	104790000	chr12	104880000	104890000	52	18.3056	17.4488	16.2853	19.5295	2.83067	2.96886	3.17968	2.65416	3.60021	27	14.4522	14.2703	16.5953	14.2982	1.86226	1.88583	1.62321	1.88219	1.92246
all_loops_1690	chr12	104990000	105000000	chr12	105040000	105050000	23	0.343968	7.32395	4.42927	3.86925	52.0308	3.11155	5.10016	5.81973	5.25445	15	0.722501	5.78079	2.96952	4.24019	18.3586	2.56768	4.91933	3.47911	4.05399
all_loops_1691	chr12	105120000	105130000	chr12	105200000	105210000	46	10.1108	17.3587	23.3291	12.8141	4.51483	2.64052	1.96764	3.56973	2.07962	29	17.6034	25.597	42.7266	20.3733	1.64375	1.13243	0.679484	1.42136	1.44555
all_loops_1692	chr12	105230000	105240000	chr12	105300000	105310000	60	17.1043	16.5943	20.9719	19.9019	3.4933	3.60004	2.85214	3.00471	4.18442	53	14.9693	14.4564	16.4092	15.5525	3.52371	3.64789	3.2164	3.39242	4.24476
all_loops_1693	chr12	105230000	105240000	chr12	105650000	105660000	25	5.40651	5.03807	4.8467	7.52154	4.55824	4.8851	5.07409	3.2933	8.10304	24	5.05479	5.88178	5.39799	9.23669	4.67526	4.0289	4.38342	2.58121	7.46829
all_loops_1694	chr12	105670000	105680000	chr12	106170000	106180000	30	5.29984	4.33464	6.77624	5.05598	5.57424	6.78748	4.37739	5.83789	7.66448	5	5.86686	4.64837	5.17049	5.53265	0.854721	1.07405	0.967651	0.905435	1.26698
all_loops_1695	chr12	10600000	10610000	chr12	11180000	11190000	65	11.763	10.7338	12.6908	16.7692	5.48764	6.00896	5.08961	3.8591	18.5273	47	12.5007	9.73696	12.203	10.9827	3.7379	4.78807	3.82833	4.24986	14.0428
all_loops_1696	chr12	10600000	10610000	chr12	11340000	11350000	30	5.5337	5.74169	9.1684	5.88139	5.34285	5.15262	3.24759	5.03227	9.64102	12	5.84915	5.36359	6.83262	5.06759	2.0339	2.21466	1.74537	2.34152	3.93766
all_loops_1697	chr12	106060000	106070000	chr12	106170000	106180000	68	24.288	23.3907	23.9117	31.3889	2.79236	2.89902	2.83611	2.16267	4.23571	56	23.0912	23.1054	23.1032	34.0933	2.41902	2.41754	2.41777	1.64067	3.49512
all_loops_1698	chr12	106190000	106200000	chr12	106260000	106270000	98	25.8446	20.86	22.9366	22.583	3.78113	4.68034	4.25843	4.32483	4.9538	89	26.4435	21.5712	29.1317	23.4493	3.35675	4.11144	3.04806	3.78356	4.60458
all_loops_1699	chr12	107090000	107100000	chr12	107200000	107210000	31	13.3652	12.0365	13.7198	13.4822	2.30966	2.56252	2.25039	2.28976	2.4214	25	11.7902	10.6433	11.6273	10.5773	2.11099	2.33633	2.14031	2.35078	2.22818
all_loops_1700	chr12	109440000	109450000	chr12	109730000	109740000	31	4.15094	3.71798	5.51163	4.55731	7.31603	8.14567	5.54206	6.67768	8.71255	18	4.6264	4.75011	6.65019	5.88994	3.82955	3.73187	2.68141	3.02173	4.77253
all_loops_1701	chr12	109460000	109470000	chr12	109520000	109530000	76	23.7843	22.9378	26.1428	27.498	3.1862	3.30327	2.89985	2.75745	5.34806	70	24.9176	27.0878	34.8415	25.2596	2.80203	2.57836	2.00621	2.76424	4.90611
all_loops_1702	chr12	109570000	109580000	chr12	109730000	109740000	60	25.3359	20.8693	20.3871	30.7778	2.3628	2.8661	2.93355	1.94638	6.16002	41	23.9313	19.199	19.6153	26.3709	1.71027	2.12964	2.08467	1.55265	4.51118
all_loops_1703	chr12	109600000	109610000	chr12	109730000	109740000	87	23.0678	26.4713	33.4994	35.0112	3.75953	3.27798	2.59231	2.48069	6.51603	65	20.5976	22.923	29.8323	30.8491	3.14529	2.82761	2.17491	2.10345	5.48193
all_loops_1704	chr12	109840000	109850000	chr12	109980000	109990000	66	26.9645	28.479	33.5982	35.9929	2.44231	2.31289	1.96153	1.83139	4.53171	38	26.1588	26.6641	32.4406	34.1147	1.45094	1.42355	1.17085	1.11356	2.90301
all_loops_1705	chr12	110130000	110140000	chr12	111610000	111620000	29	9.19499	9.82093	10.8458	9.36604	3.13072	2.93319	2.65855	3.07415	19.5505	25	7.9288	9.4547	9.13534	11.1254	3.12624	2.62698	2.71782	2.23599	16.8929
all_loops_1706	chr12	111650000	111660000	chr12	112080000	112090000	31	10.1243	6.92895	9.30536	8.6596	3.04177	4.42456	3.30662	3.55039	7.42822	28	11.8495	7.16156	7.39407	10.0984	2.35155	3.86969	3.74963	2.75533	7.15134
all_loops_1707	chr12	111840000	111850000	chr12	112080000	112090000	60	19.7171	18.2588	18.9596	24.0579	3.03273	3.27363	3.15327	2.4878	6.82446	50	21.7357	19.0107	20.0201	23.8364	2.29441	2.62157	2.49005	2.09305	6.23917
all_loops_1708	chr12	112660000	112670000	chr12	112710000	112720000	131	47.6069	52.1176	61.0283	49.7777	2.74803	2.51065	2.14467	2.62843	5.44636	111	47.4691	51.2571	57.6174	45.2574	2.33555	2.16328	1.9249	2.44944	5.01804
all_loops_1709	chr12	112660000	112670000	chr12	112740000	112750000	84	26.3632	28.8551	40.1445	32.4457	3.178	2.9045	2.08973	2.58406	6.41409	76	27.9397	31.5207	44.9236	34.5673	2.71401	2.40665	1.69022	2.19515	5.9363
all_loops_1710	chr12	113110000	113120000	chr12	113190000	113200000	108	47.8464	41.384	44.9221	49.2195	2.2546	2.60583	2.40104	2.19183	4.73735	106	40.1686	33.4162	38.0086	39.424	2.63481	3.16563	2.78415	2.68445	5.45048
all_loops_1711	chr12	113350000	113360000	chr12	113710000	113720000	35	10.0758	9.29211	11.8581	10.7123	3.44935	3.73718	2.93526	3.24631	13.017	22	9.53056	8.88876	11.2755	8.1417	2.29478	2.45863	1.94278	2.68148	7.83611
all_loops_1712	chr12	113350000	113360000	chr12	113770000	113780000	36	8.24037	7.41104	10.9756	9.29934	4.32835	4.80626	3.25942	3.8407	11.2822	33	7.84516	6.60933	10.296	8.27154	4.16606	4.93343	3.18391	3.95387	10.0942
all_loops_1713	chr12	113730000	113740000	chr12	113780000	113790000	79	28.7318	26.1773	28.5339	28.0795	2.7435	3.0102	2.76246	2.807	3.23888	78	35.5459	31.654	36.0674	30.8021	2.191	2.45953	2.1594	2.52734	3.19872
all_loops_1714	chr12	113790000	113800000	chr12	113840000	113850000	89	34.8602	28.905	36.2919	32.1221	2.54861	3.07189	2.44835	2.76519	4.06445	91	32.3925	28.3797	35.5654	31.3454	2.80373	3.19877	2.55429	2.89708	4.35913
all_loops_1715	chr12	113890000	113900000	chr12	113940000	113950000	126	57.9125	53.4725	58.4808	65.568	2.17367	2.35382	2.15258	1.92027	3.69125	96	64.4605	57.8958	65.2692	70.4255	1.48853	1.65702	1.47011	1.36263	2.87675
all_loops_1716	chr12	113980000	113990000	chr12	114080000	114090000	78	25.2062	23.351	34.7535	24.1287	3.0862	3.33035	2.2408	3.22345	5.28814	73	32.3338	28.7703	44.8113	27.1201	2.25382	2.53201	1.62765	2.68551	4.87975
all_loops_1717	chr12	114720000	114730000	chr12	115430000	115440000	21	5.31591	4.13547	6.07794	3.47883	3.89593	4.98174	3.41538	5.89579	13.4938	16	6.35581	5.31796	7.01123	6.01562	2.49388	2.9716	2.26403	2.6326	8.76847
all_loops_1718	chr12	114830000	114840000	chr12	114950000	114960000	31	10.5397	9.60044	12.7916	8.78692	2.92302	3.20604	2.41241	3.49953	5.81064	16	10.0738	8.66052	7.91373	8.49648	1.5825	1.83779	2.00905	1.87286	3.2903
all_loops_1719	chr12	115190000	115200000	chr12	115250000	115260000	52	10.1919	26.6042	16.2543	20.3386	5.06222	1.951	3.18571	2.5491	3.76029	53	8.10729	28.9671	22.2547	11.4185	6.46986	1.82681	2.37534	4.60999	4.0369
all_loops_1720	chr12	115200000	115210000	chr12	115270000	115280000	28	2.31888	5.72951	7.41608	4.32742	11.617	4.8203	3.73865	6.34681	6.22044	27	3.54779	7.2513	5.17043	7.2442	7.42916	3.68642	5.14189	3.68999	6.52183
all_loops_1721	chr12	115730000	115740000	chr12	115780000	115790000	57	11.8576	17.1509	16.7405	15.449	4.77519	3.30997	3.39063	3.67226	2.4355	70	15.5141	15.084	21.706	16.4534	4.48954	4.6167	3.21471	4.23478	2.87854
all_loops_1722	chr12	115900000	115910000	chr12	116010000	116020000	18	1.01246	1.47175	1.49668	2.35267	16.2703	11.5158	11.336	7.37972	13.6362	15	1.17647	1.55721	1.77652	1.85188	11.8295	9.11169	8.0468	7.73613	11.3364
all_loops_1723	chr12	115930000	115940000	chr12	116100000	116110000	31	8.59134	8.55814	8.65511	7.22486	3.57827	3.59199	3.55221	4.24582	7.11299	34	8.97179	9.94477	9.33007	9.88669	3.7589	3.3948	3.61609	3.41454	7.82165
all_loops_1724	chr12	115960000	115970000	chr12	116130000	116140000	53	13.1684	12.2165	10.893	11.9982	4.00199	4.3113	4.83035	4.38907	9.86863	52	9.83849	11.4483	11.4665	10.9349	5.24224	4.5115	4.50437	4.72139	9.23305
all_loops_1725	chr12	116360000	116370000	chr12	116580000	116590000	69	6.76345	20.9674	6.8186	14.118	10.0678	3.27995	9.98756	4.86005	8.04744	71	13.2655	24.6768	14.7721	16.3511	5.31965	2.86961	4.78076	4.3219	8.31888
all_loops_1726	chr12	116360000	116370000	chr12	116850000	116860000	66	9.55138	9.36318	21.2442	9.8387	6.84876	6.98496	3.09686	6.65077	11.2638	62	10.3265	9.55937	19.5181	10.663	5.95598	6.42899	3.16544	5.76978	9.60498
all_loops_1727	chr12	116580000	116590000	chr12	116850000	116860000	21	6.42939	5.22553	6.63919	6.41238	3.23154	3.96205	3.13094	3.23999	3.61664	20	3.70567	4.94287	7.02442	7.03855	5.2816	3.98583	2.82128	2.8157	3.21247
all_loops_1728	chr12	116660000	116670000	chr12	116950000	116960000	24	1.14157	4.85613	3.81686	4.19315	19.4109	4.86266	6.15289	5.6136	15.1578	22	0.974013	4.52	4.62309	3.93268	20.577	4.78355	4.67914	5.48023	11.5991
all_loops_1729	chr12	116670000	116680000	chr12	116970000	116980000	30	1.81416	3.32039	2.17101	5.26956	15.7249	8.80016	13.254	5.60568	26.2667	27	1.06004	2.70807	1.31235	3.61558	23.3612	9.65076	19.1879	7.29361	21.7977
all_loops_1730	chr12	116730000	116740000	chr12	117020000	117030000	53	10.6279	27.219	15.491	18.3071	4.94973	1.9437	3.40581	2.88475	7.24836	55	11.5145	24.8581	13.1475	17.033	4.74407	2.2077	4.15929	3.21603	7.4057
all_loops_1731	chr12	117310000	117320000	chr12	117440000	117450000	36	15.5877	14.0012	16.5817	18.7031	2.30116	2.56006	2.16405	1.9199	2.99802	38	14.3012	14.4161	17.454	17.9621	2.64561	2.62468	2.17044	2.10938	3.40591
all_loops_1732	chr12	117370000	117380000	chr12	117430000	117440000	48	19.4439	19.3832	18.2542	22.7349	2.46112	2.4688	2.62066	2.10643	2.90215	33	19.1868	20.9041	18.1754	25.5586	1.7162	1.57588	1.81118	1.29001	1.88035
all_loops_1733	chr12	117660000	117670000	chr12	117850000	117860000	59	15.1164	10.6921	13.1751	13.7333	3.88397	5.4762	4.45195	4.27231	8.63095	58	13.994	11.7597	13.0408	19.1481	4.12233	4.89896	4.42133	3.01847	8.19678
all_loops_1734	chr12	118620000	118630000	chr12	119000000	119010000	47	8.91743	8.99536	10.7243	14.6432	5.22322	5.17847	4.35132	3.1947	11.5783	35	9.62174	9.1805	13.3963	13.0607	3.61046	3.78212	2.60072	2.66702	8.9365
all_loops_1735	chr12	118640000	118650000	chr12	118820000	118830000	34	15.2076	12.4945	12.817	12.8927	2.22766	2.70753	2.63994	2.62455	4.09625	25	12.2268	12.2572	11.8951	12.9913	2.03622	2.03121	2.09253	1.91731	3.3509
all_loops_1736	chr12	118820000	118830000	chr12	119000000	119010000	144	34.6929	23.2769	29.1258	31.3175	4.14165	6.1642	4.93058	4.58662	10.4608	73	22.2121	18.4146	17.6279	22.8663	3.27625	3.94824	4.12344	3.18292	6.54162
all_loops_1737	chr12	119230000	119240000	chr12	119690000	119700000	36	13.3297	12.4978	14.983	13.2496	2.68806	2.86558	2.39343	2.7042	8.68023	31	11.3633	11.755	12.612	12.2896	2.71301	2.62337	2.44651	2.51017	7.57262
all_loops_1738	chr12	119230000	119240000	chr12	120090000	120100000	39	6.20803	7.75138	6.9024	10.9319	6.19845	4.98001	5.5838	3.54425	18.0627	31	5.41532	8.49113	8.1811	11.0444	5.63884	3.62001	3.75554	2.79064	13.4844
all_loops_1739	chr12	119290000	119300000	chr12	119690000	119700000	37	9.95639	9.76336	11.7188	10.9489	3.6892	3.7614	3.13906	3.35781	10.4157	24	11.6838	10.598	13.8536	10.3519	2.04518	2.25275	1.72715	2.30581	6.29534
all_loops_1740	chr12	119690000	119700000	chr12	120090000	120100000	48	12.6377	11.0793	11.5232	13.1121	3.7762	4.30261	4.13827	3.6406	10.2458	38	14.1013	11.9303	12.6925	14.6121	2.68286	3.167	2.97832	2.58971	8.24595
all_loops_1741	chr12	12320000	12330000	chr12	12950000	12960000	27	6.38685	7.25911	9.22133	8.96861	4.17768	3.68251	2.90731	2.98833	10.6309	33	6.82625	7.90113	8.2656	10.2645	4.77892	4.13692	3.95668	3.1936	12.8293
all_loops_1742	chr12	12630000	12640000	chr12	12940000	12950000	39	11.1614	11.7426	13.6836	15.2711	3.47204	3.30165	2.8367	2.54374	6.80721	23	9.8833	10.4719	10.5795	10.616	2.31387	2.18504	2.16302	2.15565	4.36144
all_loops_1743	chr12	12950000	12960000	chr12	13210000	13220000	40	16.1906	10.8894	11.1602	16.8115	2.46154	3.64898	3.56123	2.37116	4.60388	39	17.7988	13.0216	12.2119	17.6691	2.1845	2.97982	3.17578	2.20045	4.34832
all_loops_1744	chr12	15540000	15550000	chr12	16520000	16530000	26	7.16279	4.53315	7.14936	6.00373	3.59366	5.63331	3.60032	4.27608	27.0078	12	4.65519	3.09619	4.11591	3.91182	2.54459	3.78575	2.87008	3.01608	11.5468
all_loops_1745	chr12	16570000	16580000	chr12	16640000	16650000	107	36.476	30.2454	28.3176	34.59	2.92815	3.52936	3.7688	3.08735	4.93911	103	30.0372	26.2837	31.9678	31.2373	3.42102	3.90771	3.21506	3.29001	5.39057
all_loops_1746	chr12	16720000	16730000	chr12	16810000	16820000	64	19.8832	15.2009	16.6557	17.1428	3.20769	4.18929	3.82556	3.71749	4.25593	48	14.7742	12.6803	12.4987	14.3296	3.23379	3.76361	3.81786	3.33342	3.65936
all_loops_1747	chr12	17040000	17050000	chr12	17260000	17270000	47	13.8413	12.5503	15.9451	14.2492	3.37845	3.72324	2.93548	3.28242	7.56207	39	14.0972	12.8136	17.1295	14.9808	2.75407	3.02781	2.26936	2.5927	6.61087
all_loops_1748	chr12	17370000	17380000	chr12	17810000	17820000	31	7.54968	5.41108	6.9187	7.92682	4.06553	5.64318	4.43102	3.87451	9.31552	23	9.24741	6.56261	7.04619	10.4091	2.47127	3.46711	3.23249	2.19809	6.71673
all_loops_1749	chr12	17420000	17430000	chr12	17550000	17560000	60	25.4605	22.0906	24.4753	29.0315	2.35128	2.70836	2.44554	2.06306	4.65723	48	26.1743	22.4654	24.9165	29.0768	1.83068	2.13158	1.92273	1.64857	3.89701
all_loops_1750	chr12	17550000	17560000	chr12	21290000	21300000	15	2.40046	2.36419	2.57151	2.41886	6.03888	6.12778	5.65223	5.99478	45.0516	3	3.38305	3.03766	2.57258	3.37651	0.890025	0.987997	1.15993	0.8917	7.19009
all_loops_1751	chr12	17560000	17570000	chr12	17810000	17820000	60	9.11444	7.41968	9.65089	13.1761	6.52237	7.99236	6.16354	4.52692	13.1379	54	8.60287	7.13427	10.1238	11.7864	6.21634	7.47829	5.29156	4.55143	12.8118
all_loops_1752	chr12	17690000	17700000	chr12	17780000	17790000	82	31.6721	32.6003	35.7833	36.9204	2.58403	2.51068	2.28797	2.2177	3.89731	66	38.4163	36.5212	38.1964	44.6511	1.71615	1.80497	1.72601	1.47706	3.39755
all_loops_1753	chr12	18010000	18020000	chr12	22820000	22830000	15	1.98098	1.77227	1.98027	2.08093	7.2562	8.06507	7.25867	6.92366	76.8493	9	2.99917	2.4051	1.69081	1.52585	2.93627	3.63259	5.08151	5.59709	34.0073
all_loops_1754	chr12	18040000	18050000	chr12	22860000	22870000	14	1.38202	1.57809	1.39406	1.11494	9.51402	8.40241	9.43739	11.6055	74.9522	14	1.34631	1.48822	1.85851	0.781156	9.74895	8.87784	7.19937	16.0017	63.4104
all_loops_1755	chr12	18220000	18230000	chr12	21600000	21610000	38	5.90258	4.33267	5.90107	6.47314	6.34727	8.59527	6.34887	5.79632	378.618	29	4.64189	4.07204	3.53591	6.34159	6.1368	6.97501	8.00349	4.51752	237.803
all_loops_1756	chr12	18250000	18260000	chr12	25130000	25140000	48	5.9637	3.02288	2.28783	3.88603	7.93245	15.4025	20.1438	12.0671	229.489	42	7.09622	3.90377	1.44619	2.56478	5.85029	10.5151	27.2283	15.7987	140.134
all_loops_1757	chr12	18270000	18280000	chr12	21590000	21600000	86	5.0362	7.01075	8.23518	19.0293	16.7634	12.1084	10.3297	4.50094	247.14	82	3.59029	6.66397	5.36869	17.7001	22.2476	12.1378	15.0127	4.61234	182.196
all_loops_1758	chr12	18320000	18330000	chr12	25090000	25100000	62	8.49148	4.62248	3.47875	4.00789	7.22809	13.1499	17.3524	15.1172	381.445	74	8.09274	4.56611	2.39658	5.95517	9.04459	15.8805	29.6806	12.2375	362.851
all_loops_1759	chr12	18750000	18760000	chr12	22860000	22870000	33	2.00826	2.12455	2.67734	2.66925	15.7001	14.8794	11.9179	11.9527	190.208	36	3.01224	3.57747	4.26971	2.05575	11.5994	9.81652	8.26143	16.7459	154.989
all_loops_1760	chr12	18780000	18790000	chr12	22010000	22020000	15	0.559549	2.45404	1.16642	2.01441	22.8944	5.9122	11.9234	7.14147	141.061	16	0.266607	1.57589	1.55695	1.42996	43.9163	9.60684	9.71663	10.5231	121.574
all_loops_1761	chr12	19090000	19100000	chr12	24440000	24450000	14	0.986159	0.947763	1.51794	0.53661	12.9815	13.4572	8.71477	22.1486	145.352	8	1.4195	1.31654	2.76509	0.891984	5.33071	5.71817	2.82714	8.16545	55.0006
all_loops_1762	chr12	19100000	19110000	chr12	20280000	20290000	22	2.41738	2.92308	3.98892	2.94015	8.77896	7.31044	5.40486	7.26937	9.24763	11	3.90388	4.26485	5.94464	4.79759	2.77231	2.54304	1.83634	2.26642	3.66643
all_loops_1763	chr12	19180000	19190000	chr12	19950000	19960000	22	2.99243	1.48646	0.749651	0.879931	7.14647	13.9304	26.0107	22.5526	35.4155	16	1.81698	1.26304	2.11839	1.42327	8.39862	11.8118	7.25751	10.5694	17.039
all_loops_1764	chr12	19350000	19360000	chr12	20570000	20580000	13	0.232336	1.84202	1.17529	1.42105	39.4179	6.74554	10.2722	8.61246	49.8708	11	0.330191	1.14699	0.361278	0.782602	25.8025	8.90144	24.0636	12.5764	39.2037
all_loops_1765	chr12	20270000	20280000	chr12	24440000	24450000	54	3.68082	4.92535	6.10531	5.5149	14.3091	10.7654	8.71833	9.63508	185.612	41	6.37273	6.93716	10.8339	6.69705	6.34972	5.84043	3.75894	6.04674	81.9021
all_loops_1766	chr12	20400000	20410000	chr12	21860000	21870000	18	4.50817	3.7994	2.62454	1.99456	3.92781	4.64174	6.64333	8.64142	97.7649	28	6.98956	5.19751	3.72394	3.13885	3.96357	5.30438	7.34844	8.67592	108.938
all_loops_1767	chr12	20630000	20640000	chr12	21010000	21020000	14	0.458962	0.409434	0.385743	0.45464	25.2253	27.6778	29.0277	25.4219	29.7904	22	0.456408	0.399529	0.425505	0.274065	39.7191	44.2417	42.0548	59.0807	39.8431
all_loops_1768	chr12	20800000	20810000	chr12	21630000	21640000	14	0.339036	0.587208	1.47316	0.769461	32.1158	20.5178	8.96287	16.2169	20.2193	21	0.370171	0.458922	1.19758	0.454377	44.8773	37.7513	16.2611	38.0608	26.8653
all_loops_1769	chr12	20890000	20900000	chr12	21020000	21030000	20	2.63062	1.87	2.44481	1.25482	7.36097	10.203	7.89842	14.8359	3.55918	19	2.97706	1.88185	2.6387	1.42232	6.20722	9.63747	6.97412	12.5466	3.47333
all_loops_1770	chr12	21110000	21120000	chr12	21230000	21240000	56	21.4903	21.607	30.8546	25.8702	2.59838	2.58442	1.81233	2.16016	4.19505	63	23.7474	24.9931	34.0029	27.4663	2.64599	2.51463	1.85028	2.28903	4.56599
all_loops_1771	chr12	21550000	21560000	chr12	25180000	25190000	63	0.577207	0.76881	3.10503	2.18204	93.1769	72.6281	19.6878	27.6507	461.882	61	0.75683	0.745175	3.46835	2.67023	71.3093	72.2927	17.1228	22.0559	338.349
all_loops_1772	chr12	22070000	22080000	chr12	23100000	23110000	15	0.575039	2.2866	1.02667	2.04443	22.3691	6.32698	13.4023	7.0415	50.0692	5	0.156974	1.06639	1.50003	0.233469	19.8464	4.37246	3.18743	15.2938	18.387
all_loops_1773	chr12	25140000	25150000	chr12	25280000	25290000	63	21.2405	15.3331	19.2534	16.0269	2.95682	4.08861	3.26041	3.91271	4.78385	36	15.9973	12.465	14.3544	13.8701	2.24261	2.87306	2.4975	2.58409	3.12162
all_loops_1774	chr12	25280000	25290000	chr12	25380000	25390000	49	23.0224	15.7778	21.0634	19.0946	2.12348	3.09238	2.32004	2.55801	3.72464	44	16.6169	13.4595	14.5602	18.8669	2.63805	3.25232	3.00814	2.3251	3.78927
all_loops_1775	chr12	25400000	25410000	chr12	25630000	25640000	83	17.8588	12.3893	16.4866	17.3013	4.62726	6.65369	5.01008	4.77552	11.6854	65	16.9608	13.3847	18.0899	15.1199	3.81575	4.82768	3.57891	4.2773	9.07783
all_loops_1776	chr12	25770000	25780000	chr12	26750000	26760000	33	2.98455	5.89252	5.6904	10.9688	10.7309	5.52355	5.71635	2.9904	25.2662	33	2.37387	5.58528	6.65203	9.6293	13.3798	5.82205	4.90223	3.40209	23.0039
all_loops_1777	chr12	25780000	25790000	chr12	25910000	25920000	62	29.2229	24.8315	30.5949	23.5313	2.1178	2.49083	2.02314	2.62787	3.37638	42	25.5582	21.9581	32.1418	24.9127	1.6408	1.9086	1.30576	1.68315	2.63223
all_loops_1778	chr12	3100000	3110000	chr12	3200000	3210000	56	26.7143	27.1058	27.952	29.6605	2.09217	2.06206	1.99986	1.88505	3.52158	32	28.1386	26.6588	25.3261	33.9179	1.13674	1.1996	1.26248	0.943621	1.73675
all_loops_1779	chr12	31280000	31290000	chr12	31570000	31580000	85	15.4001	12.4467	18.5783	14.8115	5.49028	6.78265	4.5561	5.707	14.2175	88	14.1166	13.3006	19.9226	15.2078	6.197	6.57432	4.40003	5.75524	13.5585
all_loops_1780	chr12	31280000	31290000	chr12	31690000	31700000	65	17.7585	11.9787	17.3088	11.2924	3.64532	5.38966	3.73949	5.71433	9.97855	35	16.0158	12.3731	17.1616	11.0416	2.17799	2.81406	2.03342	3.15037	5.42411
all_loops_1781	chr12	32190000	32200000	chr12	32310000	32320000	93	41.1162	35.8641	54.209	32.9639	2.25882	2.58869	1.71427	2.81576	4.18383	78	40.6387	36.6995	50.4065	36.0309	1.9171	2.12231	1.54633	2.16158	3.4841
all_loops_1782	chr12	32190000	32200000	chr12	32400000	32410000	49	16.6935	17.0158	23.7389	16.2752	2.92375	2.86869	2.05966	2.99843	4.35617	49	17.8935	17.1335	26.0058	15.4297	2.72876	2.84911	1.88081	3.16169	4.54016
all_loops_1783	chr12	32190000	32200000	chr12	32620000	32630000	39	17.6804	12.9789	17.1373	12.7618	2.19906	2.98954	2.26834	3.04	5.25604	18	16.5622	11.3524	14.6359	11.6493	1.08629	1.58046	1.2283	1.54051	2.25946
all_loops_1784	chr12	3250000	3260000	chr12	3300000	3310000	129	66.9353	59.6128	70.9198	64.3842	1.92585	2.16201	1.8178	2.00204	3.10554	117	68.0526	61.5829	76.3713	59.6415	1.7182	1.89842	1.53129	1.96011	3.32949
all_loops_1785	chr12	3250000	3260000	chr12	3380000	3390000	78	41.3292	32.3785	44.7217	34.6718	1.88514	2.40467	1.74246	2.24607	4.71712	72	40.924	33.9323	42.4791	35.7092	1.75751	2.11857	1.69332	2.01345	4.47265
all_loops_1786	chr12	32650000	32660000	chr12	32830000	32840000	121	32.9474	24.4064	38.7705	27.1561	3.66443	4.94156	3.11548	4.44304	9.02482	96	31.8338	21.8955	31.1991	23.3177	3.00935	4.36908	3.07038	4.10374	7.51648
all_loops_1787	chr12	32650000	32660000	chr12	32930000	32940000	59	10.9295	9.78633	16.8463	13.4604	5.35835	5.97795	3.48749	4.35828	9.10649	37	10.3852	7.51342	13.002	8.89425	3.53833	4.87297	2.83163	4.12486	6.01104
all_loops_1788	chr12	32970000	32980000	chr12	33060000	33070000	64	27.7853	24.9919	28.1731	24.0953	2.2987	2.55461	2.26718	2.64927	3.05208	51	23.6682	21.7548	24.3268	20.8124	2.14993	2.33816	2.09197	2.44353	2.56396
all_loops_1789	chr12	33320000	33330000	chr12	33580000	33590000	61	15.12	12.0991	14.4722	13.3177	4.01444	5.00855	4.19293	4.55367	11.4961	48	11.18	8.77101	11.9435	10.7008	4.2642	5.42216	3.99384	4.45339	9.36903
all_loops_1790	chr12	33600000	33610000	chr12	33690000	33700000	85	24.2862	20.4408	21.298	30.5118	3.48968	4.14297	3.97701	2.77997	5.25038	83	21.7211	18.0463	18.7048	25.0335	3.80824	4.57946	4.41908	3.30634	5.53157
all_loops_1791	chr12	33630000	33640000	chr12	33690000	33700000	81	32.3894	33.9789	33.1622	47.333	2.4962	2.37977	2.4382	1.70978	3.31364	78	30.0976	29.8859	31.3033	41.7993	2.5863	2.60456	2.487	1.86399	3.3369
all_loops_1792	chr12	33710000	33720000	chr12	33790000	33800000	129	34.0084	33.0815	38.384	38.1878	3.78499	3.89072	3.35464	3.37183	6.13579	70	22.3608	24.457	29.8073	30.2693	3.121	2.85458	2.34391	2.30825	3.76907
all_loops_1793	chr12	34160000	34170000	chr12	34280000	34290000	35	13.6832	12.9924	13.9703	14.9281	2.54657	2.68094	2.49461	2.33562	3.35386	15	8.73929	8.15592	7.88942	8.47531	1.70828	1.82899	1.89	1.76087	1.70796
all_loops_1794	chr12	34160000	34170000	chr12	35110000	35120000	36	7.13352	9.24662	10.0633	10.2093	4.99065	3.86236	3.55199	3.50169	17.9574	23	6.40551	7.9882	8.58781	8.84639	3.55084	2.85601	2.6589	2.58205	11.357
all_loops_1795	chr12	34170000	34180000	chr12	34410000	34420000	38	13.7805	14.5932	19.5443	15.0076	2.74485	2.59304	1.9395	2.5219	3.97354	39	12.1236	10.2772	14.4449	9.13233	3.19873	3.76789	2.68824	4.23512	4.30801
all_loops_1796	chr12	34880000	34890000	chr12	35110000	35120000	56	25.6071	22.4611	24.6291	27.2396	2.18228	2.48658	2.26858	2.05197	4.31137	32	21.442	19.8831	21.1948	22.0691	1.49011	1.60635	1.50741	1.44796	2.83519
all_loops_1797	chr12	35340000	35350000	chr12	35700000	35710000	52	14.8647	11.0234	13.0092	14.8764	3.48152	4.68383	3.97431	3.47881	9.22654	22	12.6376	9.52138	11.8502	11.28	1.73502	2.29697	1.84934	1.94201	4.28519
all_loops_1798	chr12	35340000	35350000	chr12	35860000	35870000	42	9.19069	6.70738	6.62142	10.9943	4.53142	6.18446	6.26356	3.79475	14.0658	24	7.71399	6.88638	7.66322	10.573	3.08421	3.44957	3.10438	2.25802	8.06847
all_loops_1799	chr12	35620000	35630000	chr12	35870000	35880000	27	7.12662	6.77616	6.81069	9.34391	3.75002	3.94115	3.92146	2.86958	4.64648	9	6.65991	5.82142	5.01579	6.872	1.34617	1.53679	1.7788	1.30522	1.65504
all_loops_1800	chr12	35900000	35910000	chr12	36180000	36190000	35	12.8446	9.73054	13.9268	9.56773	2.71155	3.57051	2.50236	3.63064	5.37564	18	11.7424	9.02493	12.2325	8.67976	1.52841	1.98358	1.46767	2.06156	2.9355
all_loops_1801	chr12	3690000	3700000	chr12	3800000	3810000	72	28.0496	28.5542	35.762	29.1047	2.56131	2.51621	2.01049	2.46878	4.91921	68	27.6197	28.3861	35.2403	30.5882	2.45674	2.39064	1.92698	2.21909	4.61371
all_loops_1802	chr12	37800000	37810000	chr12	38170000	38180000	61	15.0599	15.1256	17.5025	15.1983	4.03036	4.01299	3.47109	3.9939	9.59985	41	13.2266	13.1443	13.8386	16.4227	3.08406	3.10322	2.94865	2.48749	6.70561
all_loops_1803	chr12	38850000	38860000	chr12	40220000	40230000	57	10.714	8.24697	8.26276	8.48315	5.2802	6.8408	6.82789	6.65257	40.7565	61	10.9669	9.20313	10.1985	11.3227	5.52099	6.56768	5.93289	5.34898	38.002
all_loops_1804	chr12	39060000	39070000	chr12	40220000	40230000	30	6.78343	6.64205	8.54737	7.53787	4.37282	4.46452	3.48083	3.94089	19.8309	13	7.61685	6.44594	6.73899	8.11541	1.69758	2.00124	1.91549	1.59457	7.15526
all_loops_1805	chr12	3920000	3930000	chr12	4070000	4080000	79	19.7061	15.0594	16.9562	17.5226	3.99372	5.21789	4.63762	4.48857	8.99278	47	18.1013	14.9187	16.7116	18.9257	2.58773	3.1361	2.80164	2.4756	4.87321
all_loops_1806	chr12	3980000	3990000	chr12	4070000	4080000	79	21.2806	22.4055	22.3492	28.6125	3.69961	3.5147	3.52351	2.7549	5.9125	43	20.3611	19.7984	20.4601	22.1412	2.10643	2.16601	2.0963	1.93784	3.2408
all_loops_1807	chr12	40230000	40240000	chr12	40760000	40770000	51	7.73117	12.4637	23.7912	11.2789	6.52521	4.06726	2.13886	4.49075	9.7281	57	8.59857	11.7667	20.4822	10.8131	6.5643	4.81177	2.77424	5.23222	10.9841
all_loops_1808	chr12	40230000	40240000	chr12	40800000	40810000	44	13.0305	9.40656	15.8501	9.59267	3.3586	4.6389	2.76487	4.54983	13.4728	28	11.7369	8.18489	15.408	7.90955	2.37394	3.39172	1.81197	3.50831	8.34959
all_loops_1809	chr12	40240000	40250000	chr12	40890000	40900000	24	8.15582	4.89037	7.67549	5.97384	2.91915	4.8293	3.09948	3.96784	8.52756	20	8.21785	6.12784	7.64849	7.18248	2.41649	3.22744	2.59405	2.76005	6.05878
all_loops_1810	chr12	40390000	40400000	chr12	40760000	40770000	92	16.4243	19.0634	26.2977	24.5186	5.57361	4.80605	3.48894	3.74108	11.9143	81	18.4099	19.2548	27.3792	21.3907	4.38144	4.19017	2.95133	3.77373	10.0313
all_loops_1811	chr12	40810000	40820000	chr12	40890000	40900000	86	23.0326	21.5752	31.1977	24.0068	3.72202	3.97228	2.751	3.57161	4.39791	78	22.2222	19.6435	23.6644	23.3939	3.49877	3.95573	3.28643	3.32426	3.94322
all_loops_1812	chr12	40950000	40960000	chr12	41290000	41300000	46	19.5544	15.3666	19.3967	13.2323	2.34553	2.98061	2.3645	3.45778	5.2726	34	19.3425	15.7832	17.9891	13.7435	1.75389	2.14692	1.88511	2.46324	4.07518
all_loops_1813	chr12	40980000	40990000	chr12	41170000	41180000	73	31.0462	28.6078	38.2501	28.6555	2.34699	2.54635	1.90612	2.54212	4.02897	62	31.0586	29.2025	36.6569	29.6379	1.99303	2.11927	1.68948	2.08824	3.40372
all_loops_1814	chr12	40980000	40990000	chr12	41400000	41410000	103	27.9263	27.826	37.1829	35.0732	3.67869	3.69191	2.76535	2.93121	11.6809	79	29.5788	30.1823	34.419	37.1388	2.6652	2.61208	2.29149	2.12413	8.54659
all_loops_1815	chr12	4100000	4110000	chr12	4550000	4560000	35	8.49858	6.02931	6.87882	6.9955	4.08207	5.72659	5.0295	4.9468	11.0855	37	11.5084	8.24963	7.46168	10.3215	3.19597	4.44331	4.90632	3.55996	11.0053
all_loops_1816	chr12	4110000	4120000	chr12	4200000	4210000	44	14.5068	13.7719	16.6174	15.5727	3.01913	3.17909	2.63797	2.81381	4.47081	23	11.9816	10.7601	12.3587	11.3988	1.912	2.12705	1.85413	2.00891	2.7681
all_loops_1817	chr12	41170000	41180000	chr12	41400000	41410000	77	29.3615	29.8317	29.0872	37.5501	2.61698	2.57586	2.64157	2.04781	5.1508	53	28.1651	30.4299	29.3426	36.2754	1.87864	1.73928	1.80351	1.45978	3.6282
all_loops_1818	chr12	41560000	41570000	chr12	41820000	41830000	96	28.1192	19.3884	25.3664	22.2119	3.40548	4.93113	3.7736	4.30712	7.73785	87	25.7756	19.2454	23.361	21.9275	3.36611	4.50236	3.71254	3.95416	7.47286
all_loops_1819	chr12	41560000	41570000	chr12	42210000	42220000	45	9.72303	8.84426	11.8249	9.27171	4.59125	5.04234	3.78201	4.81236	10.4663	38	12.3693	11.2322	14.5552	12.6432	3.05549	3.3621	2.59976	2.98982	8.41848
all_loops_1820	chr12	41850000	41860000	chr12	42210000	42220000	51	18.707	17.8428	23.0986	20.1885	2.71708	2.84794	2.20272	2.51867	6.60549	29	17.4142	16.4684	19.1258	21.0096	1.66151	1.75635	1.51359	1.37852	3.8711
all_loops_1821	chr12	45390000	45400000	chr12	45650000	45660000	28	10.139	8.37391	9.994	11.7036	2.74442	3.31606	2.78383	2.38063	4.2582	18	8.98062	7.34978	8.01333	9.41388	1.99326	2.4296	2.2309	1.90248	2.69737
all_loops_1822	chr12	45700000	45710000	chr12	45770000	45780000	43	15.2412	13.1615	14.2869	15.1052	2.80942	3.25001	2.99577	2.83455	2.7607	37	15.1133	14.6416	16.3952	18.7024	2.43865	2.51668	2.24913	1.97315	2.58723
all_loops_1823	chr12	45950000	45960000	chr12	46260000	46270000	71	18.1059	16.9777	17.306	22.6358	3.90532	4.16333	4.08479	3.12723	8.91392	47	17.0203	18.2239	21.6433	20.5787	2.75112	2.57042	2.16618	2.27771	6.61512
all_loops_1824	chr12	46170000	46180000	chr12	46250000	46260000	92	40.1181	38.0548	41.57	49.9383	2.29001	2.41385	2.21022	1.84059	2.56339	45	33.9079	33.5536	31.0307	40.256	1.32616	1.34012	1.44873	1.11755	1.45708
all_loops_1825	chr12	50470000	50480000	chr12	51400000	51410000	65	18.0249	11.7254	14.1779	14.4416	3.59175	5.50512	4.5595	4.47681	29.2167	49	16.9251	12.0731	15.8651	14.3236	2.88397	4.03347	3.07545	3.40414	21.1305
all_loops_1826	chr12	50470000	50480000	chr12	52040000	52050000	41	2.59555	7.61893	7.6601	10.8864	15.2473	5.32457	5.29632	3.74101	32.5874	32	2.26518	6.11423	6.64247	6.88631	13.5719	5.16556	4.76086	4.5947	24.4833
all_loops_1827	chr12	50490000	50500000	chr12	51050000	51060000	93	26.396	20.1002	29.7268	22.347	3.51374	4.60887	3.12136	4.14755	13.3974	92	25.5381	22.1103	28.9992	26.0884	3.5923	4.14673	3.16503	3.51683	12.7069
all_loops_1828	chr12	50490000	50500000	chr12	51290000	51300000	47	16.5164	15.2682	19.1421	15.3889	2.83455	3.06476	2.44775	3.04089	9.42025	25	15.8764	16.8274	18.0942	14.803	1.57107	1.4828	1.37956	1.68422	4.7721
all_loops_1829	chr12	51050000	51060000	chr12	51390000	51400000	48	24.2309	17.4109	17.345	21.4363	1.97691	2.74686	2.75723	2.23344	4.76735	32	22.2924	18.6022	19.2422	20.9566	1.43352	1.71638	1.65959	1.52446	3.19927
all_loops_1830	chr12	51420000	51430000	chr12	52040000	52050000	37	14.9913	12.8516	16.3036	15.5966	2.45838	2.86451	2.2617	2.36357	7.18707	15	13.7461	10.3938	11.9188	11.7379	1.09056	1.43894	1.25637	1.27557	2.75485
all_loops_1831	chr12	52760000	52770000	chr12	52840000	52850000	90	36.5792	37.595	41.4214	42.8218	2.45643	2.39024	2.16997	2.09917	3.50017	84	37.9587	39.8097	46.4215	46.2699	2.20975	2.10726	1.80777	1.81367	3.71142
all_loops_1832	chr12	52920000	52930000	chr12	52980000	52990000	81	30.074	29.9003	35.0782	33.11	2.68774	2.7033	2.3054	2.44203	3.99585	60	24.4694	25.6373	26.0231	30.5163	2.44613	2.33513	2.30065	1.96301	3.25273
all_loops_1833	chr12	53130000	53140000	chr12	53730000	53740000	47	12.6134	11.7416	14.8051	16.6739	3.70475	3.97752	3.15998	2.80794	16.3728	36	11.8544	12.0129	16.3923	14.7048	3.01982	2.9803	2.1889	2.43839	11.7078
all_loops_1834	chr12	53380000	53390000	chr12	53730000	53740000	31	11.8846	12.249	13.3384	13.6624	2.59499	2.51843	2.31426	2.25978	4.968	37	11.539	12.4563	15.5478	13.0892	3.18756	2.9547	2.37094	2.8129	5.80069
all_loops_1835	chr12	54010000	54020000	chr12	55160000	55170000	27	5.95942	5.58094	8.20827	5.59814	4.47238	4.77034	3.26181	4.75594	20.7119	20	4.31384	4.95073	7.86835	3.7413	4.55386	3.97962	2.52248	5.2326	12.9751
all_loops_1836	chr12	54010000	54020000	chr12	55640000	55650000	23	3.94739	4.28814	6.41136	4.62494	5.70739	5.26419	3.54765	4.88895	33.3	12	4.63359	5.09818	7.50679	4.75349	2.5562	2.32774	1.59068	2.49305	14.1183
all_loops_1837	chr12	55200000	55210000	chr12	55590000	55600000	57	13.29	14.4406	19.5045	16.1505	4.26436	3.92694	2.9126	3.51374	11.4981	43	14.2384	15.4295	20.9043	17.5644	3.0059	2.77536	2.05196	2.43993	7.92494
all_loops_1838	chr12	55300000	55310000	chr12	55590000	55600000	48	14.4207	16.9633	17.5483	23.6416	3.31252	2.81892	2.72547	2.02598	6.4844	49	16.5699	16.0125	15.3016	20.1303	2.94543	3.04732	3.18799	2.42706	6.53038
all_loops_1839	chr12	55930000	55940000	chr12	55980000	55990000	141	51.9289	45.1781	53.9919	44.6789	2.71196	3.1163	2.60852	3.15104	4.55598	115	46.0605	47.4412	52.9334	48.6255	2.49347	2.42106	2.17033	2.36221	4.00379
all_loops_1840	chr12	56410000	56420000	chr12	56590000	56600000	99	17.1418	18.2997	21.0258	28.9883	5.74766	5.38595	4.69095	3.40687	10.2996	72	17.7971	17.0138	19.6266	25.4591	4.02858	4.21297	3.65497	2.82092	8.26763
all_loops_1841	chr12	56500000	56510000	chr12	56590000	56600000	127	57.1819	51.5202	53.9345	74.3863	2.21885	2.46221	2.3522	1.70635	4.81945	112	49.1073	45.7806	44.764	73.1044	2.27812	2.4433	2.49866	1.53133	4.77689
all_loops_1842	chr12	56880000	56890000	chr12	56930000	56940000	114	46.6504	43.9591	50.5568	42.0596	2.44062	2.5897	2.25241	2.70638	2.38252	97	46.5786	44.3707	46.5629	47.5179	2.08018	2.18346	2.08088	2.03915	2.1957
all_loops_1843	chr12	57150000	57160000	chr12	57500000	57510000	70	22.01	21.2878	27.9895	24.1381	3.17051	3.27757	2.49559	2.89214	8.67058	52	22.1798	19.7447	22.7606	19.4341	2.33844	2.62539	2.27903	2.66714	6.93332
all_loops_1844	chr12	57150000	57160000	chr12	57640000	57650000	45	11.0237	13.2688	17.4356	14.9224	4.05441	3.37352	2.57191	3.00218	11.0068	37	11.7547	12.3597	15.3097	13.3681	3.12957	2.9776	2.40758	2.75465	9.32089
all_loops_1845	chr12	57770000	57780000	chr12	58080000	58090000	42	16.1101	15.5347	17.9426	19.0071	2.59715	2.69273	2.33337	2.20337	5.79122	34	12.8546	12.1722	12.9248	13.6041	2.63228	2.77865	2.61808	2.4883	4.78498
all_loops_1846	chr12	58380000	58390000	chr12	58640000	58650000	135	33.8904	29.9318	37.1756	33.8028	3.97466	4.49857	3.62435	3.98492	9.95521	99	26.4062	25.2544	32.4966	31.1146	3.73875	3.90859	3.04019	3.1748	7.65222
all_loops_1847	chr12	58380000	58390000	chr12	58880000	58890000	69	14.3219	14.0026	18.1948	18.9091	4.79132	4.89981	3.77704	3.6351	12.9307	39	11.9685	11.6268	15.8199	16.6636	3.23983	3.33423	2.45605	2.33243	7.56244
all_loops_1848	chr12	58930000	58940000	chr12	60040000	60050000	36	12.3276	10.7604	14.481	15.4607	2.90483	3.324	2.47582	2.31994	18.9794	23	7.98245	7.81847	12.6078	10.1376	2.85804	2.91723	1.81778	2.25638	10.3456
all_loops_1849	chr12	66100000	66110000	chr12	66150000	66160000	84	39.2462	47.252	43.9249	48.4106	2.13743	1.77606	1.91028	1.73364	2.14738	92	44.4138	50.8578	50.5999	55.1075	2.06902	1.80738	1.81657	1.66825	2.269
all_loops_1850	chr12	70450000	70460000	chr12	70680000	70690000	67	37.7231	26.1063	30.3258	30.1794	1.77405	2.56045	2.20536	2.21603	8.00656	67	36.4526	27.4906	30.172	31.082	1.83571	2.43198	2.21657	2.15188	7.90509
all_loops_1851	chr12	70470000	70480000	chr12	70550000	70560000	85	46.2299	40.642	42.111	39.9295	1.83683	2.08875	2.01606	2.12593	3.51256	60	38.025	32.8487	35.4771	31.4596	1.57639	1.82405	1.68929	1.90433	3.07973
all_loops_1852	chr12	71020000	71030000	chr12	71160000	71170000	64	29.9579	23.0315	22.0468	29.4635	2.13255	2.77111	2.89432	2.16821	4.78329	57	26.7395	21.0824	22.8164	28.3532	2.12746	2.69564	2.49167	2.00681	4.58054
all_loops_1853	chr12	71590000	71600000	chr12	72010000	72020000	175	30.6252	24.149	32.6621	31.4382	5.69891	7.22092	5.34458	5.55201	28.1115	175	29.1316	24.5018	32.4361	30.4603	5.9901	7.11737	5.38171	5.72966	27.924
all_loops_1854	chr12	72280000	72290000	chr12	72800000	72810000	32	10.128	9.0939	9.25053	14.021	3.13843	3.49144	3.43296	2.27321	10.0364	18	7.1249	6.38323	6.04147	10.5157	2.50522	2.79182	2.94718	1.70502	5.76377
all_loops_1855	chr12	72860000	72870000	chr12	73140000	73150000	79	21.0484	17.1024	21.3159	19.9408	3.74024	4.59821	3.69353	3.94696	11.9795	64	19.117	15.3042	17.9395	20.618	3.33559	4.1612	3.55332	3.09393	9.97654
all_loops_1856	chr12	73200000	73210000	chr12	73520000	73530000	47	11.5382	9.18542	11.2166	13.9337	4.04702	5.07247	4.16202	3.35621	9.27269	41	12.05	10.2598	13.2396	13.4447	3.38271	3.96724	3.08105	3.0344	8.10351
all_loops_1857	chr12	73380000	73390000	chr12	73520000	73530000	56	24.5643	21.1377	21.3594	28.4457	2.27454	2.64152	2.61423	1.96527	3.83809	41	21.8533	20.363	19.5031	26.3591	1.87216	2.00851	2.0966	1.55334	2.92225
all_loops_1858	chr12	73560000	73570000	chr12	73610000	73620000	121	54.6442	47.1577	53.4191	53.9323	2.21211	2.56255	2.26274	2.24125	2.67119	87	43.6874	41.7496	50.2959	40.5737	1.98916	2.08126	1.72831	2.14143	2.01648
all_loops_1859	chr12	73560000	73570000	chr12	73750000	73760000	55	10.9364	12.7686	15.7802	20.5166	4.99255	4.28174	3.46974	2.67261	5.4003	30	10.8134	11.6994	14.6259	13.1517	2.75808	2.55097	2.04402	2.27141	3.09657
all_loops_1860	chr12	73610000	73620000	chr12	73750000	73760000	53	15.5307	15.4683	14.081	24.6799	3.39717	3.41077	3.74446	2.14287	4.92138	21	11.2214	13.086	13.3303	18.8404	1.86372	1.60018	1.57107	1.11402	1.98138
all_loops_1861	chr12	73940000	73950000	chr12	74070000	74080000	70	16.249	14.2704	15.445	17.0818	4.28773	4.87808	4.50949	4.07989	6.65877	62	12.8267	11.9092	13.8853	13.9752	4.80402	5.17103	4.44037	4.41203	5.87378
all_loops_1862	chr12	74120000	74130000	chr12	74420000	74430000	58	27.6054	20.3114	27.9258	23.7878	2.09706	2.84645	2.07309	2.4322	6.65585	52	28.6858	21.4964	26.5506	23.6073	1.80992	2.41244	1.95492	2.19763	5.68574
all_loops_1863	chr12	74120000	74130000	chr12	74610000	74620000	59	7.40373	11.6522	17.7327	12.5926	7.87608	5.02886	3.31414	4.65625	16.6786	57	7.47172	12.1244	18.3075	13.2184	7.54122	4.67099	3.102	4.2873	14.7427
all_loops_1864	chr12	74150000	74160000	chr12	74420000	74430000	72	22.3272	23.5013	27.2645	29.8016	3.21485	3.05491	2.6348	2.41124	7.70135	51	25.2283	26.2213	31.7963	31.7253	2.01751	1.9414	1.60207	1.60564	5.06502
all_loops_1865	chr12	74800000	74810000	chr12	75110000	75120000	50	14.5288	10.6817	15.8999	10.4245	3.42476	4.64678	3.13127	4.7603	11.4679	50	11.9767	10.3338	14.8279	11.4837	4.14849	4.8017	3.35614	4.32506	10.803
all_loops_1866	chr12	74810000	74820000	chr12	75390000	75400000	26	5.94461	5.79153	6.13886	8.04703	4.3179	4.43009	4.18346	3.20362	7.33278	18	5.34017	6.36892	6.38103	8.67675	3.3271	2.798	2.79277	2.06227	4.78343
all_loops_1867	chr12	75110000	75120000	chr12	75390000	75400000	69	19.7919	12.8783	12.1255	20.5451	3.47377	5.32429	5.65213	3.34703	9.28506	34	15.4422	10.1479	9.16722	13.6045	2.19402	3.3275	3.67964	2.48823	4.75148
[truncated: 6,127 more rows]
