# Supplementary material for: The nuclear matrix protein HNRNPU maintains 3D genome architecture globally in mouse hepatocytes
Source: HighWire-hosted journal article supplement (doi:10.1101/gr.224576.117), 2017-12-22
Supplement: Supplemental_Table_S6.xlsx [file Supplemental_Table_S6.xlsx]

## Sheet: CTCF
Supplemental Table S6 Coordinates and statistics of CTCF and RAD21 peaks.
Peaks (mm9)			Chipcomp	Delta RPKM
chr	start	end	pval	ctcf_shCtrl_rep1	ctcf_shCtrl_rep2	ctcf_shU_rep1	ctcf_shU_rep2
chr1	3002462	3003002	0.240071	4.2803	2.41052	2.43849	4.7262
chr1	3315359	3315768	0.54605	7.00287	4.76341	2.36209	11.1831
chr1	3438241	3438614	0.820116	6.01815	2.28182	1.68164	6.32691
chr1	3601175	3601884	0.0904951	20.207	19.7923	15.7069	19.5
chr1	3831443	3831762	0.918083	3.57487	2.97212	1.94785	3.03995
chr1	4132520	4133073	0.205338	9.04946	5.32657	3.35592	6.51723
chr1	4218287	4218807	0.392192	6.20822	5.76701	4.58423	7.05074
chr1	4322284	4323191	0.929338	17.0268	16.9975	13.0173	16.4479
chr1	4336183	4336705	0.660853	5.48982	1.88404	3.17159	3.60309
chr1	4372849	4373413	0.266927	6.87435	4.48584	3.39918	6.58762
chr1	4406648	4407287	0.595386	12.8748	4.11456	3.94917	11.162
chr1	4506452	4507241	0.318136	22.8339	17.3304	13.5798	20.8143
chr1	4561612	4562010	0.62166	4.14275	3.42731	3.223	2.60926
chr1	4659825	4660211	0.437862	2.89402	1.93505	0.330335	3.54972
chr1	4758246	4760827	0.275292	18.9198	18.9317	16.7825	19.3566
chr1	4769381	4771108	0.714456	10.6224	10.7897	9.51094	10.857
chr1	4775435	4775982	0.0961627	3.32596	1.9461	1.64504	1.21086
chr1	4797808	4798405	0.352883	11.3584	5.65392	7.48432	2.57099
chr1	4818923	4819144	0.672853	6.12047	2.01213	3.48486	2.24369
chr1	4832892	4833208	0.971084	4.18989	2.34974	3.14374	3.63583
chr1	4845556	4846024	0.814167	3.53846	1.75506	1.67353	3.13993
chr1	4847630	4848626	0.86522	4.38878	2.38743	2.1884	1.56731
chr1	4856126	4856518	0.0804622	3.79102	0.734002	2.904	3.77914
chr1	4878599	4878960	0.00408914	3.97675	1.51483	0.583404	-0.243228
chr1	4904395	4904848	0.445374	10.6048	3.16058	3.76399	6.81213
chr1	5007865	5008367	0.868838	7.60302	4.03033	5.14677	6.53093
chr1	5009374	5010440	0.424634	11.452	8.44891	7.21075	8.38032
chr1	5060102	5060946	0.571832	13.2293	11.5731	7.36606	12.2545
chr1	5073123	5073626	0.780615	4.27375	1.92219	3.58943	2.54023
chr1	5089305	5089652	0.778903	4.26233	3.40433	2.92691	3.13122
chr1	5093152	5093697	0.240848	8.97545	6.98017	6.56575	8.63148
chr1	5128353	5128995	0.742086	6.59084	5.06813	4.62338	5.52005
chr1	5173573	5173966	0.198433	3.37105	2.00216	0.833191	3.15807
chr1	5857595	5857961	0.287948	2.4921	1.78992	1.85025	2.09699
chr1	5894931	5895473	0.807549	7.96822	4.69283	3.18847	9.76184
chr1	6125116	6125757	0.434682	15.1598	11.6637	9.62591	15.7456
chr1	6133673	6134451	0.339319	13.3462	7.15454	7.41122	13.3481
chr1	6142512	6142978	0.981652	5.3108	3.77592	2.6464	6.84958
chr1	6180477	6181151	0.0852917	9.41654	6.59314	5.95483	8.81984
chr1	6204646	6205354	0.547986	15.9446	11.0441	11.3385	8.39443
chr1	6261981	6262925	0.308441	14.8144	14.8312	9.93264	14.3217
chr1	6320621	6321197	0.403482	19.0432	20.6124	13.5567	18.2237
chr1	6391592	6392111	0.396592	4.03017	1.81032	2.52615	3.15015
chr1	6396030	6397008	0.379508	18.5774	16.0233	13.3184	17.1615
chr1	6400119	6400495	0.684703	4.22992	4.13793	4.17875	2.12247
chr1	6407739	6408676	0.620703	17.6963	11.0572	8.01271	16.6713
chr1	6447943	6448208	0.669802	3.244	6.43802	4.85564	4.44786
chr1	6469997	6470295	0.334199	2.22106	1.53981	1.30311	1.93641
chr1	6473269	6473740	0.342048	5.88087	2.60316	2.0052	3.90468
chr1	6479160	6479461	0.36593	3.10319	3.73184	2.48888	4.14385
chr1	6849012	6849740	0.804643	12.7323	9.61749	8.07243	14.0021
chr1	6987712	6988081	0.98882	6.30551	2.33273	1.63904	3.92672
chr1	7000213	7000696	0.352995	8.17532	6.03439	4.716	10.2385
chr1	7078311	7079403	0.376173	5.21978	4.38475	3.87587	3.79853
chr1	7131390	7132391	0.645411	7.15306	9.79396	5.60056	10.4815
chr1	7194615	7195451	0.132369	21.235	11.9103	11.042	20.9085
chr1	7208802	7209349	0.531572	5.05069	2.03887	0.771668	5.3975
chr1	7386830	7388021	0.970352	30.2565	25.2099	24.0312	25.6494
chr1	7388149	7388837	0.145545	24.5978	18.4208	30.0114	16.0025
chr1	7533548	7533985	0.471206	6.63997	1.43065	0.596579	6.00594
chr1	8277519	8278212	0.212606	7.3404	3.57465	1.40286	5.90211
chr1	8668778	8669192	0.666715	5.81657	2.64275	1.75699	5.70184
chr1	9531191	9532030	0.67115	27.7177	14.6069	14.1441	22.2274
chr1	9535065	9536316	0.203381	17.8522	11.5248	11.508	12.0149
chr1	9538175	9539534	0.60161	12.5571	12.0649	9.96401	11.5473
chr1	9562791	9563849	0.0756446	17.6196	14.8803	12.2181	16.4609
chr1	9602089	9602508	0.36114	3.42422	1.73405	1.52423	4.46091
chr1	9611187	9612070	0.738492	17.0888	15.7441	13.2764	14.9845
chr1	9682796	9683161	0.709163	2.94451	2.21933	1.03384	3.16387
chr1	9685516	9685955	0.854236	6.77856	1.69288	4.14986	2.79932
chr1	9686669	9687431	0.655099	23.8193	26.3674	21.0151	23.0966
chr1	9690715	9691071	0.245928	2.48029	1.67845	2.04244	0.946961
chr1	9693074	9693626	0.700492	13.4334	7.78945	8.02396	9.74138
chr1	9715648	9715946	0.813806	3.13432	2.00404	1.78708	2.32732
chr1	9719483	9720120	0.144897	11.0868	6.51888	6.61433	8.24913
chr1	9727943	9728165	0.490946	7.71587	1.4114	3.44403	1.98371
chr1	9762381	9763357	0.420726	20.2476	22.4699	19.3695	19.5891
chr1	9780817	9781138	0.954439	4.35106	2.1465	3.19817	2.25604
chr1	9788240	9788715	0.30335	4.2161	0.790821	2.63077	0.487437
chr1	9804806	9805389	0.267138	7.14081	3.31581	2.39204	4.8093
chr1	9816248	9816653	0.318435	2.77827	1.79385	1.17883	2.427
chr1	9835954	9836279	0.912107	2.87473	1.97298	2.25391	2.26694
chr1	9838275	9838813	0.133605	2.02384	1.44553	3.29467	2.04498
chr1	9840104	9840680	0.862076	8.64963	10.5502	7.84441	7.12372
chr1	9925498	9925898	0.468745	3.64272	2.22077	2.69306	3.10295
chr1	9929065	9929439	0.91738	2.40009	1.96804	1.94441	1.82211
chr1	9933861	9934363	0.373844	3.81319	3.47274	2.67762	1.89472
chr1	9947780	9948026	0.895714	2.32902	1.71365	3.38054	1.41961
chr1	9957965	9958476	0.0399938	4.02063	3.3983	1.41219	1.67886
chr1	9971821	9972203	0.0594931	3.17335	4.65028	5.18932	3.16895
chr1	9979820	9980416	0.682715	7.55608	9.30121	4.20537	11.1799
chr1	9982403	9982830	0.637439	5.8101	6.85596	5.17656	4.33141
chr1	9997052	9998026	0.0791257	22.0689	21.0865	20.2488	20.7744
chr1	10027286	10028234	0.609281	9.88666	10.548	8.39505	8.52044
chr1	10029119	10030531	0.217122	13.9221	13.058	17.758	9.72846
chr1	10079323	10080527	0.369381	23.8159	25.2484	21.9652	23.6478
chr1	10104625	10105209	0.544655	9.0865	4.02685	3.76808	7.92076
chr1	10171807	10172273	0.827546	8.61483	6.17455	5.9366	5.29029
chr1	10186974	10187458	0.444802	10.5036	9.83086	9.2291	10.6994
chr1	10195926	10196271	0.413808	3.68929	2.40704	3.15365	3.0453
chr1	10211217	10211457	0.128264	2.81604	1.02629	2.86426	2.22338
chr1	10218804	10219628	0.951335	19.4679	15.569	11.668	17.0347
chr1	10221609	10222551	0.306002	4.31116	3.45699	2.98119	3.64574
chr1	10222651	10223647	0.644134	10.699	4.59037	6.12512	3.22293
chr1	10387829	10388376	0.906134	11.628	6.76186	6.33928	9.8631
chr1	10419877	10420605	0.981285	22.4261	18.0001	13.3954	20.4865
chr1	10478076	10478820	0.741227	15.1741	7.02715	6.33697	15.1737
chr1	10497362	10497751	0.624803	4.08531	1.75466	3.02599	3.30111
chr1	10582597	10582992	0.0452298	2.04849	2.65847	1.11046	0.372363
chr1	10749588	10750469	0.0478676	17.2208	14.7435	10.1754	14.7106
chr1	10761743	10762478	0.383787	9.87174	10.1236	8.34304	8.514
chr1	10825547	10826327	0.928412	14.8243	12.4564	12.0616	11.2926
chr1	10826999	10827720	0.463713	17.4698	13.286	9.93961	18.2271
chr1	10994170	10994480	0.578897	4.08333	1.31693	2.86407	1.72294
chr1	11017382	11017917	0.176224	9.02191	3.88983	2.07679	6.03497
chr1	11050036	11050330	0.210517	4.92933	3.52219	0.792138	4.26054
chr1	11055090	11055941	0.0148865	21.4585	16.7839	13.1281	22.9927
chr1	11087084	11087740	0.358529	9.11368	4.58975	3.05006	9.3516
chr1	11129860	11130602	0.0611354	19.1811	19.8328	16.8151	20.1682
chr1	11134605	11134903	0.627671	2.02143	2.04989	4.50613	2.12281
chr1	11135314	11135773	0.832449	7.02841	6.06237	4.46627	6.28535
chr1	11141541	11142024	0.408	6.6799	12.6683	9.38655	9.0163
chr1	11223746	11224532	0.0662553	13.4261	7.70529	7.54118	13.683
chr1	11375888	11376365	0.921858	6.51695	2.32311	2.9813	5.73653
chr1	11404038	11404624	0.731329	11.8627	4.49093	4.10628	8.20926
chr1	11456331	11457149	0.428192	8.00535	7.01156	3.64983	10.143
chr1	11555321	11556000	0.505673	13.3671	9.41504	7.05701	12.679
chr1	11647498	11648354	0.509849	17.6041	18.6589	14.1362	20.1815
chr1	12018136	12018653	0.848977	8.05337	2.79655	2.13811	5.80386
chr1	12689106	12689603	0.862381	8.43531	2.49478	2.87286	3.79835
chr1	12826710	12827700	0.0452403	19.9403	18.2122	15.1291	18.1294
chr1	12854068	12854616	0.288053	12.5631	5.83081	5.08062	9.44225
chr1	12925887	12926287	0.74042	3.84783	1.69656	1.73544	3.41228
chr1	13039765	13042726	0.911807	11.8431	10.7284	8.39055	11.7299
chr1	13107539	13108217	0.513634	4.40227	4.57059	5.239	4.40916
chr1	13124205	13125182	0.755104	21.2395	16.2646	15.7861	16.4877
chr1	13128266	13128787	0.976336	8.8398	7.26718	6.00461	7.26115
chr1	13132890	13133317	0.353938	3.75993	2.83874	3.34272	3.3105
chr1	13140865	13141664	0.282622	21.2295	23.7235	19.25	19.9179
chr1	13180648	13180996	0.875704	2.72702	0.980398	1.38747	1.87024
chr1	13217223	13217804	0.284106	9.86659	3.61281	6.38978	6.00286
chr1	13318297	13318630	0.539706	2.516	0.822617	2.21676	1.47509
chr1	13345735	13346232	0.610799	9.35358	4.56746	5.39968	3.99691
chr1	13362002	13362498	0.281937	1.61612	1.00911	0.525758	0.951594
chr1	13362625	13364880	0.799822	10.6048	5.64889	11.068	5.11451
chr1	13366825	13367252	0.350153	5.22481	2.08067	1.66422	3.22233
chr1	13490444	13491086	0.916712	16.802	7.9411	5.97443	13.6322
chr1	13521446	13522355	0.402789	20.879	18.1008	17.5226	19.2985
chr1	13579260	13581021	0.688328	13.1032	11.2156	13.6754	10.4445
chr1	13649733	13650712	0.881673	11.0362	11.6884	8.99824	10.0289
chr1	13687386	13688384	0.747363	14.677	10.4878	8.94993	14.6401
chr1	13689713	13690200	0.0448094	10.4226	10.7139	13.2001	10.3315
chr1	13696065	13696982	0.108924	23.7295	22.565	20.899	20.094
chr1	13773922	13775017	0.711013	15.421	17.7088	12.7606	16.4056
chr1	13778687	13778914	0.581409	1.71505	1.79633	3.46713	2.16088
chr1	13778996	13779870	0.51559	21.7641	21.7135	19.5979	21.0074
chr1	13849848	13850137	0.0579693	2.56874	1.63486	2.01533	2.99476
chr1	14560610	14561315	0.514712	12.9181	11.8233	10.8116	11.5677
chr1	14625937	14626492	0.0863468	5.7743	5.1194	4.08507	7.39278
chr1	14676299	14676589	0.952109	2.76503	1.70973	2.71652	2.58282
chr1	14718992	14719633	0.421348	9.99574	9.63421	7.53602	11.6173
chr1	14728243	14729082	0.359855	9.65776	7.6591	6.87302	10.7862
chr1	14729796	14730751	0.84296	10.8599	9.5494	13.4238	8.42607
chr1	14828057	14828852	0.961355	9.07095	2.15642	1.4614	8.83445
chr1	14847555	14848001	0.956319	3.69789	3.15768	1.69301	3.92608
chr1	14852251	14853055	0.57925	14.7198	14.284	10.699	13.1917
chr1	14868628	14868885	0.847199	2.11678	2.26938	2.2653	1.02456
chr1	14908559	14909374	0.878096	14.5248	13.92	11.558	12.1611
chr1	14970386	14970763	0.608711	10.4331	5.02159	9.64747	6.44067
chr1	14997452	14998144	0.350048	13.2215	16.2694	11.2395	12.6746
chr1	15101405	15102038	0.637757	17.6217	5.46082	6.11167	12.1326
chr1	15276452	15277153	0.368897	8.40495	2.67057	3.73514	4.93318
chr1	15317386	15317873	0.961073	8.83642	3.67547	4.39234	8.52602
chr1	15611871	15612804	0.886742	13.5256	7.29742	5.94864	14.2343
chr1	15673634	15674229	0.952916	12.8357	6.86997	4.2965	12.9364
chr1	15781691	15782734	4.29641e-05	17.4892	13.4614	11.6952	18.275
chr1	15865078	15865541	0.881504	16.1357	17.7792	15.9589	14.4542
chr1	15892342	15893437	0.756543	19.5055	16.6743	13.2277	17.979
chr1	15949443	15949836	0.885564	3.37105	2.22543	2.35937	2.93902
chr1	15983611	15984049	0.702109	7.85389	13.0183	8.26851	5.06657
chr1	15996874	15997472	0.576461	9.71289	3.92129	3.89425	8.41696
chr1	16058174	16058570	0.0364175	3.60603	1.32229	1.05101	1.11428
chr1	16085729	16086213	0.531915	7.65553	5.58263	4.10955	7.3331
chr1	16094044	16094583	0.785194	4.92185	4.70621	3.19578	4.35868
chr1	16094875	16096422	0.859272	19.443	13.3122	16.5694	13.6446
chr1	16105000	16105855	0.233531	2.60307	1.93787	4.29248	2.28122
chr1	16106352	16107121	0.581092	9.05008	3.75001	3.25322	9.66052
chr1	16150174	16150572	0.00804963	6.84373	6.01426	4.91078	4.93916
chr1	16209518	16209764	0.586405	2.42036	2.72659	2.38894	0.596987
chr1	16215249	16215703	0.877152	5.90536	7.93555	7.24391	4.59197
chr1	16218514	16218862	0.528407	3.01925	5.40284	5.58351	2.80786
chr1	16294896	16295658	0.468322	17.4987	23.5338	17.7461	15.7206
chr1	16423457	16424217	0.941368	21.7462	20.2126	18.3189	18.3918
chr1	16429892	16430786	0.0540933	21.4999	20.6615	17.2129	19.1678
chr1	16481210	16481851	0.344829	8.84125	3.94959	4.85598	7.12226
chr1	16509568	16510333	0.301889	15.7134	13.6407	14.042	10.7884
chr1	16543991	16544413	0.932752	4.76324	1.98508	2.02599	3.12867
chr1	16567748	16568212	0.865101	4.42701	1.47165	0.909407	3.94806
chr1	16608796	16609208	0.835126	2.96561	2.22955	1.7655	1.23651
chr1	16621772	16622340	0.584202	7.86265	3.97343	4.44195	8.38359
chr1	16654999	16655605	0.625033	3.29071	4.13874	2.52208	5.10687
chr1	16678939	16679246	0.757222	4.09716	3.53859	4.06732	4.06312
chr1	16735865	16736778	0.393001	19.2851	18.6803	14.406	18.4507
chr1	16788189	16788972	0.0346902	20.9086	13.5096	12.4413	18.2466
chr1	17113445	17114069	0.068441	17.6634	15.4403	12.9524	16.2141
chr1	17153062	17154226	0.388412	12.6301	13.2219	9.5242	13.1467
chr1	17619692	17620374	0.791366	8.77638	11.0238	6.25191	12.6338
chr1	17970616	17971164	0.306259	18.8048	11.4514	12.2913	14.6301
chr1	18002834	18003463	0.208798	11.335	5.07025	3.8617	8.96175
chr1	18096065	18097594	0.520134	18.9188	16.5116	11.3604	19.6717
chr1	18121498	18122239	0.309473	10.6888	10.0641	7.11303	10.0759
chr1	18278962	18279518	0.928383	10.7119	3.29912	4.37791	10.1589
chr1	18349496	18350521	0.371187	8.31005	8.02825	5.31208	9.66503
chr1	18966510	18967526	0.875014	16.6346	11.6917	7.92122	17.1761
chr1	19046353	19046966	0.470932	12.5413	6.24527	6.07507	10.5804
chr1	19168855	19170103	0.890684	10.3266	12.1699	9.30286	14.0994
chr1	19195257	19196737	0.775204	24.7353	24.5104	17.5406	23.2606
chr1	19222864	19223327	0.60169	2.51405	1.83061	0.467272	2.99943
chr1	19280144	19280648	0.987231	7.88003	2.44663	3.32917	5.11293
chr1	19767407	19768171	0.876794	9.66032	6.7374	3.35469	11.9001
chr1	19773017	19773524	0.711081	3.85152	1.51238	1.20486	1.78046
chr1	19917174	19917678	0.245777	2.71664	1.86409	0.418202	2.04739
chr1	19963343	19964139	0.270886	12.599	11.4423	7.66984	10.9034
chr1	19979275	19979632	0.324182	3.50261	3.22467	2.06815	4.63077
chr1	20279869	20280450	0.209474	5.84663	2.68728	5.53845	3.80008
chr1	20301107	20302243	0.837244	16.3327	16.6895	12.9661	16.2948
chr1	20364180	20364466	0.745523	3.0574	1.69972	1.84221	3.43332
chr1	20503443	20504263	0.293937	18.0595	18.9998	13.4002	19.0186
chr1	20534418	20535178	0.922124	17.4749	9.4983	7.14775	16.2085
chr1	20538093	20538445	0.0621469	2.90649	2.67486	0.298445	2.28212
chr1	20543944	20545334	0.0474752	17.3691	18.8157	17.0228	18.4653
chr1	20602454	20603259	0.888556	22.3642	25.1585	20.2118	21.2911
chr1	20604138	20604400	0.861116	3.9565	2.61284	3.70372	1.56575
chr1	20608004	20608429	0.962284	3.08363	4.21039	2.40419	4.3095
chr1	20656827	20657100	0.201866	2.09952	2.66847	1.44253	3.10396
chr1	20689863	20690585	0.20018	23.43	18.313	14.7314	21.0593
chr1	20728424	20729119	0.694968	18.1203	14.5464	12.5906	15.7537
chr1	20741205	20741522	0.290393	3.85156	2.34235	1.50505	2.14871
chr1	20747967	20748399	0.702753	6.6678	2.99329	2.52001	4.22732
chr1	20752324	20752699	0.30049	6.06739	2.17853	2.36895	2.68755
chr1	20791779	20792383	0.887775	20.0791	20.8717	20.163	19.3685
chr1	20822460	20822896	0.589101	5.42372	2.9659	1.61708	2.73219
chr1	20880563	20881614	0.0719279	13.2875	11.3668	8.1763	11.1781
chr1	20915473	20915755	0.710939	3.85957	1.65108	2.91078	1.4551
chr1	20923505	20924222	0.411517	9.70945	16.2623	6.57526	18.1483
chr1	20928835	20929655	0.703895	18.7876	21.3202	17.5369	20.0392
chr1	20933074	20933535	0.738141	7.51172	3.67707	3.86812	6.55008
chr1	20964788	20965192	0.277406	2.3662	1.56415	1.41531	0.69712
chr1	20998889	20999243	0.171278	2.61738	6.82567	5.66059	0.567451
chr1	21004755	21005075	0.239275	3.12595	2.8472	1.78568	1.01398
chr1	21030945	21031222	0.313223	2.70837	5.27042	3.28318	0.304187
chr1	21068679	21069109	0.263168	2.4481	2.12053	1.31689	1.62712
chr1	21069486	21069892	0.145681	5.54982	3.99152	3.36445	2.14717
chr1	21070359	21071039	0.760105	9.77941	11.2097	6.5646	10.5798
chr1	21091040	21092101	0.836023	10.908	10.8429	7.05596	14.2304
chr1	21151719	21152723	0.563942	19.0068	17.5754	15.4948	18.3688
chr1	21155906	21156828	0.628125	25.6978	24.1435	23.8083	22.4046
chr1	21203500	21204177	0.987668	7.72089	2.41631	3.20218	3.83485
chr1	21208146	21208998	0.709833	32.3523	29.3217	27.5706	26.4206
chr1	21242401	21243168	0.989008	6.709	5.72855	4.85689	5.19988
chr1	21256623	21257482	0.272788	12.8597	11.4702	10.6819	9.34573
chr1	21261181	21262505	0.149175	5.86159	5.68762	10.177	4.90702
chr1	21266231	21266489	0.401548	4.44768	3.42291	2.51514	3.33229
chr1	21334330	21334829	0.341789	12.4924	5.06328	5.36684	11.0329
chr1	21401070	21401894	0.155071	21.5438	19.814	15.5621	17.4684
chr1	21409459	21410043	0.598014	5.05984	2.49969	2.36957	2.44354
chr1	21438045	21438733	0.612068	10.9108	6.36964	5.0583	10.3238
chr1	21439444	21439774	0.604098	1.85015	1.39094	1.66527	1.69484
chr1	21450938	21451678	0.744018	18.5656	7.04658	7.39312	19.0579
chr1	21512126	21512588	0.1903	6.9372	2.71915	2.87358	6.22916
chr1	21604021	21604357	0.0897792	3.34711	2.55268	3.81596	3.8576
chr1	21828634	21828983	0.411495	0.563983	1.70386	2.83127	1.16107
chr1	21937732	21938150	0.986863	4.52717	2.09265	1.62063	3.58759
chr1	21951259	21951964	0.282243	7.50855	2.39248	5.76433	3.60382
chr1	21957108	21957950	0.356756	14.8033	14.0284	8.30793	14.8345
chr1	22095509	22096057	0.367275	11.9304	6.40411	5.23245	10.7884
chr1	22257761	22258157	0.615343	4.29385	2.66904	2.97264	3.7864
chr1	22258918	22260024	0.927345	21.4528	22.6063	19.851	19.9281
chr1	22348245	22348771	0.727288	12.3857	3.44249	4.98613	7.74158
chr1	22367751	22368233	0.830172	4.66002	2.04006	1.42917	4.86184
chr1	22376342	22377121	0.777815	12.0595	6.04394	5.98837	10.5648
chr1	22494078	22494822	0.0303499	17.7203	12.2187	11.1647	18.7891
chr1	22611140	22611739	0.134425	9.78287	7.21355	13.2321	8.02236
chr1	22633741	22634216	0.176448	11.4792	8.7723	3.81238	9.24345
chr1	22678713	22679201	0.446141	6.52221	3.41213	3.00521	4.87579
chr1	22741291	22741651	0.72207	2.80172	2.23108	1.91215	2.91876
chr1	23068618	23069477	0.673691	14.1746	8.77884	6.70011	14.8716
chr1	23121653	23122029	0.554257	5.75583	2.2273	2.1701	3.92054
chr1	23123991	23124318	0.484935	2.54196	3.70422	2.83412	2.34633
chr1	23127745	23128186	0.135857	9.20098	7.3664	6.10924	10.3205
chr1	23147276	23147775	0.664805	6.65978	9.12923	5.74523	8.47969
chr1	23157866	23158204	0.762248	3.69892	4.44337	4.25348	4.76302
chr1	23175151	23175831	0.362506	14.6788	9.03969	8.12633	13.7217
chr1	23263531	23263889	0.0703586	3.12367	5.13779	2.51109	0.886703
chr1	23293403	23294186	0.148382	17.6996	16.7621	11.4539	13.9442
chr1	23330856	23331801	0.561654	12.3564	16.7248	12.1414	15.3253
chr1	23368343	23368684	0.0818965	3.12778	4.1071	3.74373	5.53093
chr1	23389613	23390021	0.250023	4.27473	1.78069	3.53805	0.325514
chr1	23502117	23502736	0.361193	11.7763	8.82073	5.54042	11.4032
chr1	23651543	23652005	0.373148	2.61388	4.15892	2.15241	2.11651
chr1	23712122	23712846	0.66437	14.0057	7.6307	5.76701	15.2698
chr1	23799423	23800304	0.591816	27.1929	19.562	17.971	24.0536
chr1	23833559	23834620	0.169225	19.1338	15.9409	14.7157	17.5167
chr1	23912499	23913346	0.76616	6.16365	12.5891	5.98753	10.0377
chr1	23926895	23927637	0.880124	13.2667	12.4331	10.6552	11.3474
chr1	23928475	23929392	0.549417	5.53187	1.59729	2.85575	1.81581
chr1	24002370	24002620	0.351715	5.14369	0.366391	2.94979	3.5102
chr1	24040789	24041584	0.751145	12.6697	8.83022	5.45498	12.7672
chr1	24066070	24066573	0.952326	4.71577	2.45148	3.47982	3.68172
chr1	24141532	24142910	0.004007	16.8549	18.477	16.7876	19.0067
chr1	24143316	24143591	0.248659	2.21883	2.46493	1.97674	3.08147
chr1	24143775	24144515	0.262233	32.9273	26.3655	20.8952	30.0719
chr1	24177813	24178946	0.307476	19.04	18.3506	15.3771	18.5085
chr1	24237103	24237577	0.799247	8.8299	4.03942	2.58999	8.25216
chr1	24246095	24246540	0.375317	4.40169	1.7841	1.73462	2.18113
chr1	24255728	24256925	0.580979	16.2967	17.5905	13.524	15.8583
chr1	24268026	24268364	0.218431	5.29052	2.71624	1.65769	2.15888
chr1	24304218	24304689	0.56865	5.22367	1.6713	2.07564	4.19043
chr1	24307541	24307926	0.0688277	5.20278	2.10434	4.2694	7.01055
chr1	24309342	24310025	0.681852	14.9518	9.23137	8.28581	14.742
chr1	24374100	24374930	0.256129	19.3449	15.6766	12.716	21.5031
chr1	24381679	24382165	0.187762	8.3701	4.55803	3.46377	6.83411
chr1	24385329	24385684	0.841071	2.69585	1.52111	1.67329	3.23752
chr1	24685073	24685749	0.177666	39.1495	31.9014	33.6445	30.0755
chr1	24737664	24738643	0.383165	7.49348	3.9449	4.85705	3.36316
chr1	24744326	24744628	0.327846	2.14366	1.06137	2.64604	2.27871
chr1	24773664	24774107	0.681615	9.04628	5.93733	8.21338	5.77485
chr1	24775298	24775705	0.441232	4.12279	2.19947	3.38376	4.00162
chr1	24776228	24777139	0.158917	11.2458	5.78109	4.46793	10.2975
chr1	24957981	24958524	0.619804	9.29875	2.86765	3.01906	9.39351
chr1	25566720	25567788	0.131571	19.8865	12.5668	9.94757	21.0704
chr1	25583757	25584207	0.844525	6.84249	3.89467	3.07361	7.09258
chr1	25673598	25674180	0.448238	9.26761	10.7503	5.85347	12.0406
chr1	25753455	25754028	0.0785466	8.01114	3.61539	5.21833	7.24861
chr1	25883573	25884097	0.624431	8.84479	3.06282	2.41736	8.98006
chr1	25941910	25942260	0.433768	4.58074	2.09446	2.39492	4.84607
chr1	26959056	26959544	0.952475	6.28097	2.13886	1.00174	5.68466
chr1	27951952	27952836	0.696076	7.94896	9.13499	3.79304	11.2333
chr1	27957039	27957630	0.947453	7.59528	2.08707	2.07812	8.00623
chr1	30201827	30202276	0.825937	4.82211	1.6705	1.89302	5.27428
chr1	30316347	30316958	0.53476	8.81771	3.51225	3.40214	7.53305
chr1	30641273	30642432	0.0147198	18.5436	21.4916	16.7744	18.9959
chr1	30652966	30653339	0.164123	3.68956	2.34444	1.57772	1.89424
chr1	30753137	30753692	0.127896	8.24683	3.55471	3.36407	6.3838
chr1	30757054	30757759	0.386812	10.9296	13.3476	8.31948	12.3445
chr1	30797424	30798305	0.807205	19.0874	19.6041	16.7721	17.8073
chr1	30832954	30833405	0.939911	3.68922	3.42984	1.95819	4.21274
chr1	30835229	30836262	0.142163	17.9033	18.0702	17.3434	19.0761
chr1	30836826	30837598	0.888816	16.7373	14.4667	9.5504	16.9292
chr1	30928664	30928958	0.353896	3.6261	3.27047	2.98129	4.36418
chr1	30929858	30930709	0.830859	5.02372	2.87285	6.36395	1.23261
chr1	30977475	30978123	0.296412	19.6042	9.40091	6.77642	16.4098
chr1	30987499	30988517	0.766534	17.9196	16.1618	12.479	15.5755
chr1	31000369	31000867	0.733602	8.19518	4.82273	4.16129	7.05174
chr1	31005115	31006195	0.762549	12.8672	12.9753	12.4174	12.3785
chr1	31006308	31007094	0.244513	6.87549	2.40463	2.31236	2.33739
chr1	31209808	31210316	0.0975722	29.4239	30.93	26.5585	28.2672
chr1	31210711	31211654	0.456098	22.7767	21.1702	17.9174	19.9863
chr1	31266547	31267465	0.325147	14.7288	16.8737	14.001	15.5622
chr1	31393803	31394479	0.942238	12.8821	13.3144	8.31408	11.5533
chr1	31435822	31436219	0.108127	3.82015	1.63328	0.335331	2.61581
chr1	32231309	32231802	0.892039	7.6502	3.17986	2.05049	6.89748
chr1	32610811	32611244	0.878506	4.81362	2.00453	-0.0906794	5.26584
chr1	32757024	32757309	0.0890324	5.03351	1.6098	2.21873	3.64019
chr1	33021683	33022247	0.738465	8.20697	3.80948	2.71951	8.33471
chr1	33079554	33080339	0.463638	9.47816	6.9789	5.53869	11.7538
chr1	33352968	33353351	0.547601	3.88355	1.77167	2.78301	2.50054
chr1	33556369	33556904	0.686009	8.238	8.92637	7.88352	7.02455
chr1	33569527	33569889	0.552398	3.11126	1.99533	2.85243	2.27363
chr1	33593424	33593978	0.445713	10.256	5.68337	5.32606	9.04869
chr1	33622614	33622960	0.436099	3.2317	1.89309	1.71669	4.5651
chr1	33653825	33654277	0.206076	8.06767	3.97457	4.58385	5.29103
chr1	33684646	33685195	0.484292	6.61833	4.70062	1.30529	6.84575
chr1	33704076	33704484	0.646253	9.5676	14.9411	6.92848	15.5978
chr1	33719379	33720823	0.491772	14.9467	13.9939	11.8747	14.8698
chr1	33726525	33727643	0.241574	8.54216	6.77499	5.18406	6.81788
chr1	33728769	33729947	0.271579	11.8606	11.624	10.4268	11.5021
chr1	33740812	33741965	0.135139	13.5707	11.7496	13.663	12.6581
chr1	33776630	33777271	0.502757	3.74748	2.90503	2.95646	2.62718
chr1	33789862	33790647	0.900307	7.04449	6.08356	5.59529	5.31419
chr1	33791669	33792140	0.141711	6.67846	5.04052	3.84469	4.75047
chr1	33794763	33795072	0.0301638	3.45064	3.39599	1.93814	0.470044
chr1	33795928	33796900	0.263854	23.1769	22.8024	21.2059	22.2105
chr1	33799450	33800564	0.127935	21.7899	17.0485	16.6223	20.1818
chr1	33805997	33806302	0.978067	3.08873	3.18464	2.27421	2.07425
chr1	33814248	33814886	0.829551	9.65873	6.4613	5.811	5.6503
chr1	33862851	33863117	0.938353	2.54182	1.58529	3.87802	1.95976
chr1	33870832	33871708	0.0443257	8.18171	4.89737	4.45559	4.17032
chr1	33903640	33904057	0.116776	5.61628	4.18575	3.58292	6.26738
chr1	33932499	33933095	0.155236	9.89422	6.20687	5.49265	8.78551
chr1	33948470	33950243	0.0435234	12.2696	8.99976	8.71841	13.0749
chr1	33964324	33964778	0.715678	11.1496	1.02694	5.90998	2.76233
chr1	34000751	34001205	0.786501	10.4183	2.41042	3.2792	8.10113
chr1	34021326	34022218	0.255524	15.7781	9.72288	8.14221	14.4811
chr1	34023115	34024122	0.890655	16.3005	15.5584	12.2398	17.7647
chr1	34062146	34063011	0.88987	16.3618	16.8015	16.3428	15.624
chr1	34067627	34068901	0.461155	19.9516	15.8651	15.7551	13.7442
chr1	34106443	34106874	0.293165	3.2127	4.52744	0.746887	3.25073
chr1	34117472	34118364	0.688848	15.5866	19.6198	14.0588	17.8417
chr1	34121374	34121643	0.616793	3.79997	0.890676	4.22693	1.34527
chr1	34124954	34125832	0.774813	14.2302	8.16538	8.2021	12.4739
chr1	34150301	34151021	0.833677	17.3284	13.6055	12.4249	16.3645
chr1	34153171	34153450	0.517401	3.16237	2.14003	3.71805	2.8384
chr1	34154397	34154944	0.52979	5.59015	8.44737	7.05029	4.61992
chr1	34166310	34166936	0.456532	9.53925	8.27312	6.73934	8.00096
chr1	34174224	34174927	0.692481	6.56586	10.7948	5.1401	9.55987
chr1	34175286	34175673	0.436497	3.46073	4.77144	1.59198	4.58793
chr1	34180550	34180986	0.967981	1.50139	2.3084	1.93647	2.14369
chr1	34221381	34222236	0.430019	24.344	24.6025	22.3159	21.3729
chr1	34225108	34225742	0.980711	7.03285	6.98686	5.56737	7.12429
chr1	34230154	34230461	0.255094	2.73297	2.02152	3.56099	2.4811
chr1	34231732	34232197	0.00398502	4.03627	2.44177	4.92229	4.48358
chr1	34246444	34247494	0.436767	19.9181	11.2271	12.3958	17.4245
chr1	34257699	34259020	0.783919	13.8015	12.785	8.85646	14.2158
chr1	34274532	34275823	0.430407	19.4355	19.2999	17.2797	17.9556
chr1	34303789	34304140	0.854323	2.55691	1.097	2.53047	0.541503
chr1	34342171	34342436	0.959337	2.721	2.14959	1.65316	2.66333
chr1	34347623	34348030	0.687079	5.11691	5.48398	5.73107	4.98435
chr1	34348167	34348501	0.611142	1.98238	1.37433	3.09084	1.9484
chr1	34466647	34467278	0.221197	10.351	3.78613	2.84466	8.54086
chr1	34491524	34491911	0.9918	4.96398	2.74862	2.53949	2.79445
chr1	34496614	34497248	0.588351	20.2785	15.0172	14.3702	17.5785
chr1	34498752	34499192	0.162551	5.72622	5.23294	2.96593	3.68594
chr1	34500024	34500285	0.825416	2.59033	2.11918	2.06091	1.55105
chr1	34516329	34517069	0.0225649	6.24498	6.61797	5.19122	4.99631
chr1	34519480	34520235	0.206718	5.20596	2.71254	6.18592	5.43702
chr1	34528812	34529151	0.339988	3.58299	2.36888	3.04539	2.42744
chr1	34542706	34543104	0.662973	3.08969	1.59483	1.73004	3.61416
chr1	34567926	34568383	0.824235	10.738	5.91798	5.53077	11.2909
chr1	34659035	34659674	0.814949	22.4649	13.4504	16.8768	14.8901
chr1	34662413	34662961	0.6553	8.64904	8.20933	6.44973	11.1715
chr1	34698687	34699971	0.799459	14.659	9.37733	8.66978	13.5085
chr1	34757494	34757968	0.0324637	7.14981	5.17945	2.58999	6.34434
chr1	34794955	34795780	0.88852	21.7249	15.6401	10.2722	19.9179
chr1	34855330	34855716	0.911691	3.49032	4.16237	3.71139	4.25126
chr1	34864848	34865069	0.97625	0.961149	0.916004	2.00614	2.08156
chr1	34869440	34869900	0.170953	3.62026	3.35421	2.13736	1.88391
chr1	34899208	34900626	0.957202	4.10936	4.01866	8.30979	2.39115
chr1	34923710	34924825	0.0286838	28.5979	24.3981	23.9368	26.4745
chr1	34948176	34949027	0.283656	19.9013	14.5627	13.2848	16.5666
chr1	34950447	34951166	0.897237	12.5527	6.50952	6.32546	12.3291
chr1	34953468	34954404	0.41195	19.4031	17.8858	16.4709	18.9918
chr1	35442157	35442700	0.747553	13.9943	5.27538	4.57464	12.7021
chr1	35444960	35445472	0.939767	4.66419	2.84274	1.39943	6.75066
chr1	35535151	35535522	0.473524	6.82751	2.32019	2.66383	6.54455
chr1	35765034	35765433	0.278903	4.92786	2.26774	0.931912	2.75561
chr1	35772891	35773254	0.795977	3.4268	2.25035	2.72237	5.1472
chr1	35783494	35783881	0.834659	3.27298	3.54951	1.53529	6.30709
chr1	35840274	35840659	0.884144	4.26523	2.44618	1.64393	3.5915
chr1	35896262	35896712	0.667465	12.3302	6.07696	4.72775	10.605
chr1	36121315	36122281	0.0947411	27.5375	26.1904	23.9919	24.1147
chr1	36124841	36126167	0.907178	7.35411	3.73681	7.48026	2.96072
chr1	36163697	36164201	0.0152264	2.49607	1.90481	2.52423	3.54989
chr1	36191216	36192251	0.70697	14.7684	16.3531	16.7186	14.3498
chr1	36201575	36202522	0.943241	16.5895	15.5627	14.3769	14.6747
chr1	36205951	36206732	0.89558	18.9992	14.5603	14.1751	18.4841
chr1	36262832	36263170	0.0881404	5.70506	6.97764	2.34846	7.21874
chr1	36281270	36281918	0.412667	9.81405	11.4147	9.9168	7.81562
chr1	36293414	36293809	0.974556	3.12971	2.2315	3.00854	2.66079
chr1	36300684	36301073	0.748661	3.65026	1.28597	1.18395	1.76592
chr1	36305178	36305430	0.537214	2.06945	1.67301	1.69366	1.16566
chr1	36309178	36310419	0.604135	21.0304	21.8977	18.9082	21.3161
chr1	36311235	36312112	0.21432	27.9918	20.7832	19.7208	21.3412
chr1	36312859	36313522	0.638573	9.03955	4.61793	3.94043	5.91144
chr1	36333860	36335258	0.60887	20.3276	15.1163	15.063	17.7119
chr1	36335906	36336737	0.911316	27.7374	25.2099	22.5516	25.9615
chr1	36367331	36367906	0.0141508	7.26773	3.2141	3.5562	3.90215
chr1	36378462	36379065	0.671843	6.62579	3.11522	2.69123	6.8261
chr1	36380679	36381269	0.79882	15.73	12.1725	8.61979	16.6571
chr1	36382079	36382339	0.575991	2.79834	2.46434	3.19921	2.00481
chr1	36428520	36428784	0.547596	6.82285	1.01094	2.9194	1.87962
chr1	36436570	36436846	0.194233	12.045	0.699064	3.39651	8.63329
chr1	36496630	36497014	0.564138	2.50987	2.73443	1.58979	2.46137
chr1	36501596	36502246	0.281858	8.16529	10.983	8.47491	7.20334
chr1	36511180	36511736	0.863678	11.3068	5.72962	5.97706	9.02905
chr1	36528284	36529161	0.445464	11.6481	8.49412	25.2824	6.06389
chr1	36549141	36549793	0.449217	12.6775	8.2595	6.30892	11.1656
chr1	36553574	36554044	0.812978	8.08864	6.53082	5.14146	7.81073
chr1	36557752	36559015	0.67512	22.0487	22.3679	20.4557	21.487
chr1	36568040	36569802	0.9716	9.04154	5.24044	7.01988	4.32641
chr1	36570259	36571165	0.0776828	16.2974	11.5063	11.0427	14.5629
chr1	36591594	36592095	0.525799	5.99941	8.08241	6.94257	5.40137
chr1	36601349	36601632	0.120331	3.19726	2.52624	1.13611	1.75387
chr1	36603564	36604594	0.177506	26.2498	22.6781	22.1192	20.4117
chr1	36607846	36608339	0.398667	4.06533	2.89079	0.923314	4.68816
chr1	36613738	36615583	0.961094	20.99	16.9546	18.3309	15.9517
chr1	36652437	36652901	0.511575	7.11254	2.65709	3.37585	5.49865
chr1	36672901	36673172	0.618068	7.19329	1.04583	3.66385	4.87195
chr1	36691470	36692662	0.532578	22.4631	20.866	20.9727	19.8449
chr1	36721221	36721734	0.952687	6.30557	3.33174	2.79437	6.55907
chr1	36740395	36741864	0.879152	25.0576	20.9622	18.4486	21.7919
chr1	36753288	36753628	0.476466	3.70066	1.77731	1.42002	2.92651
chr1	36764951	36765392	0.204688	2.12028	2.54981	1.42293	1.54591
chr1	36765577	36766949	0.232935	12.1486	11.0237	8.28804	10.8761
chr1	36792832	36794830	0.53704	12.6949	10.7914	10.5362	12.1241
chr1	36801019	36802095	0.0400231	21.099	13.2892	13.8384	17.0657
chr1	36803148	36803962	0.666786	15.0501	4.70853	5.32151	9.68082
chr1	36841106	36842086	0.0810193	17.5693	17.256	14.8012	15.9149
chr1	36843114	36843757	0.992547	9.64358	4.75514	5.03144	7.91536
chr1	36848133	36848383	0.331494	1.02986	1.05141	0.35448	0.0716989
chr1	36862330	36862703	0.187913	3.15799	2.17185	2.14372	1.49998
chr1	36878600	36879169	0.900725	7.61386	7.65333	7.61869	6.44463
chr1	36890692	36891092	0.232228	3.58998	2.57405	1.80432	1.24214
chr1	36927405	36927793	0.730565	5.96007	8.19384	4.22202	10.1412
chr1	36931620	36932058	0.323704	7.97165	3.39999	3.25896	3.81734
chr1	36960821	36961359	0.967723	11.7951	7.92289	7.4782	8.61002
chr1	36969037	36969514	0.052942	4.95555	4.19212	5.171	5.89078
chr1	36986693	36987301	0.687275	9.49244	5.02373	5.28367	6.79961
chr1	36989925	36990333	0.897577	5.75595	3.05441	5.3758	2.64671
chr1	36994421	36994943	0.553701	11.5449	13.1741	10.5491	8.88379
chr1	36995840	36996370	0.061932	4.26621	1.37157	2.20131	0.914352
chr1	37208785	37209139	0.468429	2.49426	1.93571	1.80332	0.901601
chr1	37251243	37251755	0.812924	5.08012	4.268	2.99518	6.82422
chr1	37307243	37308337	0.0686405	13.9109	6.71274	6.77233	15.2662
chr1	37315317	37315604	0.531738	6.45748	0.930208	3.61477	4.40777
chr1	37328644	37330338	0.854055	12.9815	13.9401	12.8036	12.2724
chr1	37385985	37386404	0.299098	5.43176	7.29121	3.30047	8.3353
chr1	37407621	37407973	0.384334	2.15157	2.98231	2.04966	3.61149
chr1	37458360	37459340	0.91473	16.3127	15.0829	12.8831	16.89
chr1	37475733	37477023	0.875648	31.9307	19.7591	22.1837	23.3177
chr1	37486435	37487692	0.416993	5.05035	3.50904	3.36265	3.78348
chr1	37505049	37505634	0.830358	8.49434	3.23919	2.37512	9.67758
chr1	37691257	37692124	0.410927	25.5393	15.6908	14.8165	22.0987
chr1	37692995	37693516	0.322685	4.99253	2.5092	6.67657	4.94642
chr1	37695747	37696732	0.577577	21.4423	12.8107	11.316	18.6935
chr1	37710767	37711773	0.527018	7.85077	1.97742	3.11213	5.15141
chr1	37734689	37735892	0.332149	18.0068	17.4241	13.8537	18.3674
chr1	37747296	37747966	0.183414	13.7222	9.94483	9.5749	12.2809
chr1	37761983	37762413	0.365719	5.18844	3.0867	3.6552	4.96037
chr1	37765083	37765564	0.577133	6.771	4.98454	4.95516	5.92018
chr1	37776346	37777099	0.990182	11.076	1.36517	4.11975	3.1121
chr1	37816221	37816698	0.674238	6.17872	6.31448	6.31238	4.69084
chr1	37859130	37859568	0.577074	9.14931	6.30553	6.6961	8.76093
chr1	37921425	37922421	0.187599	7.37372	5.31285	3.33262	3.8091
chr1	37923890	37924549	0.885683	25.554	20.1485	23.7803	17.9125
chr1	37928568	37928814	0.337757	1.2235	1.15169	0.968837	2.51879
chr1	37929160	37929415	0.595348	2.44909	1.30978	1.32626	1.92454
chr1	37929522	37929941	0.822082	2.33541	1.78982	2.06723	3.21091
chr1	37938603	37939151	0.809561	4.94732	2.83632	3.14339	3.57979
chr1	37948030	37948866	0.570195	14.7668	13.1797	9.63143	12.5327
chr1	37959668	37960556	0.0884724	16.0712	15.6819	12.3436	16.0369
chr1	37961403	37961973	0.914377	10.9135	3.11219	3.90969	8.60298
chr1	37988493	37989156	0.210254	32.1102	28.204	25.2973	23.7836
chr1	38011478	38011897	0.021528	4.7816	3.60956	2.346	2.47879
chr1	38022389	38022895	0.463474	4.39771	2.22291	2.33878	3.41528
chr1	38025063	38025362	0.0945492	2.87634	0.430313	2.80205	1.78611
chr1	38030285	38030688	0.563882	3.28761	3.91228	2.78318	2.08744
chr1	38042343	38043352	0.898843	26.5122	18.995	16.7465	21.7138
chr1	38054217	38055311	0.903266	22.275	17.5393	17.2873	15.8738
chr1	38076815	38077085	0.41129	3.23791	0.339351	3.47171	1.49954
chr1	38108940	38109362	0.367237	3.13994	2.69675	4.94882	2.69498
chr1	38140994	38141318	0.934304	1.92913	1.97905	2.26085	1.61002
chr1	38185690	38187433	0.800386	15.8266	9.61804	17.063	7.76555
chr1	38241488	38242931	0.095321	19.4177	20.0109	17.8708	18.79
chr1	38259277	38260199	0.474002	11.6963	15.4186	15.092	11.4254
chr1	38309511	38309927	0.953839	7.34968	3.60266	3.12433	7.55439
chr1	38321567	38321800	0.0959838	3.43857	0.810446	3.18812	2.71247
chr1	38449650	38450204	0.0657099	8.553	5.03702	2.2563	9.20419
chr1	38826672	38827116	0.932916	3.77999	1.12703	1.55121	4.59819
chr1	38844224	38844713	0.855153	10.0828	4.87518	4.27214	10.1645
chr1	38845632	38846374	0.357574	12.0053	4.40446	4.10574	9.41385
chr1	38856106	38856714	0.231597	6.59531	1.80089	0.931987	5.82824
chr1	38912918	38913662	0.523212	11.0016	4.51071	3.60945	12.5188
chr1	38919055	38919465	0.196735	4.04124	2.20704	0.920649	3.23744
chr1	38991462	38992050	0.865405	11.7841	4.12558	3.95082	9.49095
chr1	38993503	38994140	0.75604	14.2824	5.46329	5.22703	12.9077
chr1	39046411	39046779	0.337286	1.59848	2.71522	1.29703	1.73479
chr1	39057050	39058605	0.464763	14.5876	13.2544	12.1797	12.7667
chr1	39067263	39067988	0.0816604	15.9053	15.5071	12.638	17.3366
chr1	39237389	39237778	0.537922	6.17255	2.51629	1.38451	4.25081
chr1	39245684	39245953	0.783352	2.45962	1.8681	0.886307	1.82475
chr1	39249395	39249987	0.109189	4.37021	2.34556	1.07956	2.86841
chr1	39253381	39253880	0.917521	7.84228	5.67107	4.24194	9.34275
chr1	39263820	39264148	0.99293	3.20708	1.57476	1.96292	4.2902
chr1	39274252	39275003	0.730823	9.76045	5.09388	4.42715	10.2456
chr1	39284580	39284932	0.308141	3.61613	2.23471	0.803938	3.19377
chr1	39286484	39287295	0.565974	4.6264	1.30142	1.25439	3.83973
chr1	39310707	39311127	0.615121	4.99687	1.97823	1.4939	6.23559
chr1	39397326	39398310	0.835494	12.9007	8.64716	7.03132	12.8347
chr1	39409523	39410025	0.328515	6.88355	1.93169	3.12081	4.22533
chr1	39448690	39449985	0.851938	19.9199	19.5131	18.305	19.2764
chr1	39457916	39458269	0.360814	2.93944	3.18366	3.22393	4.5612
chr1	39463968	39464360	0.820073	4.206	1.80086	1.09032	3.38572
chr1	39470831	39471229	0.343742	3.8471	2.41802	2.45539	2.68589
chr1	39473257	39473518	0.00549289	2.25129	0.63444	3.80369	2.42259
chr1	39473754	39474046	0.412049	2.38845	0.0604266	2.01389	1.68151
chr1	39485866	39486352	0.0979994	4.89679	2.04325	3.52048	4.07249
chr1	39488974	39489383	0.142617	6.75068	3.04696	4.1417	4.70564
chr1	39534762	39535896	0.0798836	6.11403	3.07452	4.4875	2.4287
chr1	39554568	39555071	0.432313	7.17763	3.32418	1.96519	5.63335
chr1	39561081	39561925	0.107956	17.531	9.23415	8.95388	15.2888
chr1	39579233	39580480	0.267439	14.0218	14.8934	13.303	12.366
chr1	39583900	39585018	0.80436	22.6087	18.3546	16.2398	22.7722
chr1	39586771	39588037	0.700431	18.4224	18.3498	16.7069	19.1386
chr1	39592453	39593193	0.0566354	4.62253	2.38894	2.71881	0.601948
chr1	39597334	39597772	0.667359	7.25007	4.94059	5.56746	4.56274
chr1	39604062	39604425	0.0535093	3.16082	1.60066	2.30938	3.36891
chr1	39633232	39634304	0.70361	10.0735	3.51728	6.87975	3.96654
chr1	39668257	39668740	0.667673	5.4282	3.32227	1.94387	5.29759
chr1	39671488	39672426	0.300301	21.6657	15.6681	12.9731	21.5384
chr1	39698423	39698927	0.889098	6.38909	3.11625	4.4318	5.22329
chr1	39737321	39737970	0.889017	14.9284	6.62702	6.82654	12.603
chr1	39742319	39743227	0.250455	20.6016	20.4357	18.1792	20.3858
chr1	39752125	39752492	0.83712	3.7893	3.5965	4.52273	2.69234
chr1	39766873	39767123	0.798698	4.05578	1.04002	2.17363	2.87261
chr1	39815158	39815847	0.221505	10.9774	10.0394	12.4503	8.97727
chr1	39818000	39819296	0.548844	15.3082	16.1725	13.3929	14.0906
chr1	39957939	39958558	0.651648	2.52279	1.29445	2.10057	0.443828
chr1	39967579	39969028	0.642923	16.3278	12.9277	14.8403	13.5983
chr1	39993253	39994169	0.552965	25.1489	21.1912	21.8513	20.3806
chr1	40006017	40006355	0.412918	2.11149	2.39609	2.42994	1.85121
chr1	40031702	40032204	0.967457	3.84496	7.41336	4.85908	5.44065
chr1	40033691	40034302	0.529166	5.29585	6.96664	5.67635	4.67148
chr1	40039703	40040624	0.410826	11.5882	10.2101	10.024	9.43297
chr1	40057404	40058421	0.349847	13.4839	12.8968	11.2169	14.8825
chr1	40058680	40059332	0.640882	5.20085	3.83495	2.82206	5.51257
chr1	40142610	40142907	0.718026	2.49978	2.47656	2.82086	2.37734
chr1	40152411	40153028	0.837459	11.4692	4.67697	5.44998	11.0299
chr1	40171678	40173641	0.67843	20.6076	19.785	19.2511	18.843
chr1	40209069	40209534	0.962173	9.34738	5.12013	2.50835	8.07974
chr1	40244938	40245297	0.774374	2.74684	1.42011	0.463069	2.78711
chr1	40281700	40282041	0.149456	2.43791	3.68119	0.699716	2.45002
chr1	40313554	40313973	0.645731	6.90887	3.41643	1.64354	5.28288
chr1	40347430	40347833	0.946953	4.87907	2.35416	3.2654	4.08578
chr1	40350641	40351291	0.457928	12.9526	7.48025	5.84919	11.6253
chr1	40351625	40351989	0.862219	2.89077	2.50397	2.30306	3.12323
chr1	40435377	40437559	0.124677	20.5726	20.8538	17.45	20.2884
chr1	40594417	40594799	0.0767057	4.68273	2.86355	1.17623	2.29587
chr1	40601447	40601954	0.903564	14.566	17.6302	15.1796	15.2657
chr1	40636272	40637246	0.796087	21.4721	18.6393	14.424	21.5324
chr1	40714690	40715360	0.411631	16.9582	8.69939	9.00261	15.4241
chr1	40820952	40821262	0.934699	3.34585	1.78529	2.2015	1.96001
chr1	40825401	40825922	0.772791	10.6252	2.96224	2.63401	10.4611
chr1	40854035	40854828	0.943094	12.2843	5.1532	3.46336	12.3419
chr1	40859136	40860402	0.708953	21.8385	20.6356	17.8761	21.368
chr1	40901263	40902395	0.0419152	20.0864	19.3882	16.2309	20.2769
chr1	40921901	40922232	0.117961	3.20217	3.75078	1.92825	1.48398
chr1	40935611	40936526	0.668063	20.4036	18.8945	15.0555	22.564
chr1	40941750	40942162	0.259232	3.98639	2.28626	1.90045	3.56568
chr1	40944392	40944915	0.369375	10.4986	4.76597	5.88606	11.6805
chr1	41193382	41193739	0.778014	2.94729	2.18435	1.19692	3.71673
chr1	41208968	41209864	0.964872	16.1007	17.1111	13.0156	16.1344
chr1	41215176	41215473	0.45065	3.96338	2.87335	2.61497	1.71368
chr1	41320969	41321630	0.505633	18.3162	10.3251	8.06528	15.8294
chr1	41331326	41331833	0.441829	9.06769	3.78489	2.81631	7.12147
chr1	41443135	41443691	0.582349	4.94292	3.73087	2.99818	7.9993
chr1	41615741	41616440	0.480219	5.5788	4.36085	1.95619	5.99528
chr1	41654523	41654824	0.138581	5.15745	1.69285	4.31406	4.8583
chr1	41867229	41867611	0.372221	6.66946	4.56826	2.55796	9.89639
chr1	42295183	42295772	0.0109918	6.4572	2.67892	1.68827	6.07693
chr1	42747967	42748663	0.663965	16.7592	10.4868	8.06744	17.8284
chr1	42771486	42771822	0.442904	5.65245	3.06289	2.31235	3.05197
chr1	42836609	42837180	0.153556	9.62907	2.64538	0.982444	6.18325
chr1	42879487	42880033	0.401826	8.74596	4.45488	3.09321	9.21393
chr1	42912831	42913170	0.414388	4.27692	2.4092	4.27404	3.68071
chr1	42913280	42913640	0.419892	4.84703	2.9811	1.81871	2.59016
chr1	42971346	42972458	0.318934	14.5697	13.4768	11.7852	13.2908
chr1	43099233	43099608	0.306201	3.06369	1.77291	0.917936	2.83577
chr1	43108751	43109127	0.495382	2.52449	2.42427	2.46576	2.04137
chr1	43122688	43123317	0.418096	14.5563	11.3011	9.43834	13.6395
chr1	43149003	43149788	0.792728	7.29742	2.47237	5.45347	1.21942
chr1	43167227	43168313	0.00579141	20.3804	17.5812	16.4672	22.3888
chr1	43169107	43170377	0.862843	8.53861	11.2909	5.12047	11.3769
chr1	43194888	43195710	0.700217	19.0852	15.0474	14.2536	16.8663
chr1	43196227	43197078	0.568301	26.5402	24.4632	20.5777	22.2393
chr1	43199829	43200575	0.935815	10.5286	8.98658	7.90736	10.1144
chr1	43206127	43206595	0.725986	6.12191	3.69526	3.76244	6.8051
chr1	43220672	43221132	0.932828	4.08005	3.42235	4.613	3.04624
chr1	43321126	43321888	0.340719	20.2558	19.956	16.8924	15.0419
chr1	43326504	43326989	0.928043	20.3315	16.5278	15.0871	16.0937
chr1	43333753	43334110	0.146389	3.3989	2.3838	1.08699	0.336751
chr1	43355940	43356862	0.045978	16.4945	16.8494	14.8145	16.5546
chr1	43361352	43361868	0.339161	8.12257	3.5168	3.98379	4.89694
chr1	43502087	43503360	0.453828	16.0092	6.71474	10.0944	6.02515
chr1	43568034	43568553	0.731591	8.39206	2.85719	3.3295	6.37622
chr1	43618424	43618754	0.0776861	2.96336	1.60666	0.554596	1.45046
chr1	43692509	43693328	0.763971	10.831	6.52513	4.40611	10.7708
chr1	43788849	43789396	0.923825	9.32264	2.53296	2.04158	8.44566
chr1	43794824	43795716	0.552762	21.6401	15.6948	14.0651	16.6477
chr1	43816642	43817568	0.688437	20.3445	18.6777	16.6607	18.7118
chr1	43819308	43819902	0.479911	5.68334	3.75373	2.8445	3.80161
chr1	43823470	43823953	0.0146563	8.56957	2.5752	5.26851	6.30433
chr1	43825244	43825782	0.808683	4.6973	2.70031	2.71601	2.23849
chr1	43881422	43881762	0.709307	3.76682	3.92985	2.92248	2.74719
chr1	43884032	43884466	0.454913	2.1209	1.56396	1.44582	0.777161
chr1	43955325	43956423	0.867284	18.4704	10.6104	9.47318	15.4234
chr1	43959196	43960289	0.613369	21.0268	20.4313	17.2372	20.0876
chr1	44006545	44007033	0.0786452	9.94863	6.90019	8.65274	6.22523
chr1	44023437	44024175	0.424567	13.0892	7.95842	6.4936	9.44778
chr1	44098404	44099330	0.629477	22.8927	23.0872	21.0326	19.6002
chr1	44121247	44122235	0.646746	18.5972	15.9098	12.6486	18.5388
chr1	44158975	44159572	0.599547	3.03451	1.81777	2.24284	1.71701
chr1	44165992	44166399	0.500895	4.90265	2.25687	2.74212	2.56498
chr1	44174460	44174785	0.632869	3.20775	2.74394	3.19342	2.04078
chr1	44175462	44175828	0.806361	2.28976	2.78605	2.71544	1.96465
chr1	44176447	44177426	0.806267	14.6249	14.7812	14.3279	10.9186
chr1	44204633	44206186	0.739713	15.0388	15.0263	10.5255	14.2815
chr1	44212017	44212724	0.00114107	13.4957	9.41544	5.89685	9.97324
chr1	44224723	44225372	0.704302	8.99563	5.7324	6.65506	7.45229
chr1	44230739	44231172	0.953646	5.91929	3.7432	4.24609	4.41644
chr1	44285650	44286296	0.153976	8.86737	5.64863	3.49313	8.11494
chr1	44294085	44294611	0.881443	6.78143	4.14161	3.77137	7.21612
chr1	44494646	44495125	0.655841	9.8757	3.93427	3.28206	8.67941
chr1	44802394	44803104	0.382005	20.6261	17.8797	11.9646	20.1378
chr1	45370571	45371697	0.797302	7.8147	14.6338	7.21748	14.9428
chr1	45488166	45489368	0.261839	15.9094	13.507	11.5513	13.5101
chr1	45684418	45685312	0.321177	16.0212	11.4486	9.08155	15.0113
chr1	45729542	45730040	0.694603	6.80593	8.98497	5.17676	8.9795
chr1	45822826	45823540	0.580975	19.5819	23.1028	18.9761	21.2322
chr1	45826790	45827384	0.982117	8.38796	6.97847	6.62484	7.6969
chr1	45852001	45852650	0.284093	2.50831	1.85426	1.10447	1.21168
chr1	45873290	45874404	0.0372846	23.2854	22.1469	20.3978	22.3346
chr1	45881579	45882581	0.0425042	21.2241	18.889	18.5732	18.1473
chr1	45919787	45920149	0.0962867	5.93769	4.11183	6.16545	7.97983
chr1	45981164	45981410	0.236118	2.83898	2.0143	0.923314	2.06752
chr1	45988080	45988689	0.776265	9.00534	14.2224	8.66145	10.6498
chr1	46005876	46006239	0.0682296	4.88713	3.23586	3.93045	3.65546
chr1	46075078	46075831	0.116879	14.8259	8.2448	8.60973	13.2684
chr1	46079044	46079857	0.162784	14.9935	10.5802	9.48646	13.3949
chr1	46122930	46124236	0.516218	10.5196	6.09723	8.81728	6.56223
chr1	46398869	46399285	0.799146	7.13666	4.14648	2.7099	6.70934
chr1	46465223	46465646	0.403257	5.49912	3.08242	5.25192	1.68364
chr1	46473439	46474456	0.599	14.7835	9.62263	12.2235	8.91257
chr1	46482456	46482860	0.700786	2.95224	2.02254	3.18914	2.49511
chr1	46637150	46637616	0.3137	7.76039	4.77646	3.05153	9.56786
chr1	46906304	46907167	0.723982	14.146	15.0573	10.8579	12.4345
chr1	46909039	46909303	0.55929	3.34137	1.76323	1.23878	3.22982
chr1	46913330	46913764	0.559853	5.54914	4.94794	3.62159	6.10519
chr1	46971094	46971745	0.764029	20.9312	8.37117	8.92304	17.782
chr1	46981838	46982430	0.970049	9.68594	8.9536	5.17273	9.82114
chr1	46996085	46996684	0.48074	9.26353	2.23536	4.29596	5.36125
chr1	47027140	47028045	0.920174	11.6948	14.3788	9.62312	15.0692
chr1	47334405	47334999	0.882234	7.99143	4.29422	2.83505	8.34963
chr1	47865950	47866980	0.551984	19.0522	18.3522	14.6289	19.5205
chr1	50086665	50086901	0.047639	4.32312	0.474798	2.48974	4.99212
chr1	50888442	50888993	0.768939	14.6081	3.83193	5.23456	10.1727
chr1	50983692	50984727	0.695899	11.0257	4.59291	4.44397	7.91774
chr1	51018670	51019760	0.672981	14.6593	18.5031	13.5437	15.192
chr1	51085881	51086256	0.0773398	3.78618	2.26968	2.47231	5.03079
chr1	51345179	51346874	0.242061	9.83324	9.91449	7.92731	9.15998
chr1	51390494	51391597	0.586847	13.591	14.8341	10.333	12.8405
chr1	51394917	51395320	0.878932	4.78716	2.69774	2.31488	3.11104
chr1	51404376	51404889	0.818574	10.0682	1.60141	2.91374	8.37108
chr1	51503052	51503300	0.091954	2.66706	2.90886	1.1623	3.01847
chr1	51515238	51516524	0.93494	11.4978	11.2895	10.9316	11.0245
chr1	51522120	51522500	0.150014	8.75713	5.70319	4.71999	10.5004
chr1	51522995	51523853	0.254661	17.063	13.3894	9.69606	17.3798
chr1	51534854	51535593	0.241637	7.4411	7.04298	4.06226	5.5619
chr1	51605818	51606321	0.373583	8.95035	5.43225	4.49539	8.90116
chr1	51613457	51613940	0.0799533	7.65484	2.63775	3.59937	2.38891
chr1	51653718	51654623	0.693484	22.4781	23.0247	19.3698	20.241
chr1	51657143	51657924	0.77441	19.935	19.596	17.379	18.3186
chr1	51672140	51673341	0.726218	20.4079	16.8904	14.3034	18.5131
chr1	51695469	51696243	0.0369761	14.3763	13.9893	10.7971	16.5027
chr1	51700709	51701921	0.317738	19.4611	20.3859	17.7306	19.4362
chr1	51725470	51726254	0.0994253	16.9981	9.84535	9.41873	11.7
chr1	51728163	51728607	0.500565	7.13436	5.80975	3.00244	7.67307
chr1	51746336	51746771	0.736322	4.53606	1.73986	0.599316	3.75706
chr1	51784085	51784338	0.107141	4.09114	-0.0494893	3.48466	2.56975
chr1	51894659	51895066	0.826351	6.38751	4.82736	3.23339	7.21875
chr1	51952180	51953244	0.971921	6.74493	5.50033	3.76891	6.26706
chr1	51971798	51973407	0.658828	17.0747	10.8684	11.2246	10.7984
chr1	52001453	52002531	0.753274	14.9108	13.4287	10.4278	13.4863
chr1	52055189	52056018	0.9031	13.5307	6.43	5.80874	13.5677
chr1	52060688	52061602	0.173152	25.5198	19.6137	16.7998	21.3546
chr1	52142963	52143671	0.792734	11.8817	7.7038	5.51998	12.2745
chr1	52155334	52156946	0.0630285	12.8564	13.626	11.373	13.5116
chr1	52157126	52157938	0.719546	23.3978	7.04293	7.21763	20.7362
chr1	52170414	52171425	0.669831	34.2968	29.3354	29.5763	28.5965
chr1	52175750	52176806	0.228598	6.68437	6.40933	3.53866	5.09831
chr1	52202952	52204033	0.818496	8.89074	11.171	10.1159	8.2924
chr1	52204341	52204562	0.582431	3.69007	1.47951	3.08408	2.94016
chr1	52226702	52227499	0.974733	17.0634	12.2841	10.7301	16.1194
chr1	52273526	52274097	0.120822	17.8679	16.066	16.702	13.1649
chr1	52289067	52290369	0.31013	2.93789	1.61677	2.25958	0.966073
chr1	52295834	52296296	0.184587	5.61147	2.77837	3.65546	5.91068
chr1	52324324	52325259	0.592006	13.8125	11.5507	9.46877	12.9765
chr1	52356247	52356846	0.124216	9.9552	8.8996	6.57818	7.9685
chr1	52357835	52359251	0.489843	16.8689	12.7873	11.5634	16.3957
chr1	52359362	52360285	0.879574	16.2315	14.6953	14.5815	14.9021
chr1	52360523	52361081	0.410321	6.11577	3.51111	2.1011	4.13333
chr1	52363650	52364367	0.86631	13.3077	5.17996	6.94771	11.8902
chr1	52385325	52385882	0.88407	8.41689	3.03217	2.46407	7.62083
chr1	52443924	52444321	0.699896	7.05105	3.11157	2.27915	7.33692
chr1	52449696	52450288	0.881526	12.5138	3.81262	3.47322	10.6732
chr1	52543020	52543432	0.377864	4.87516	3.21431	5.97122	2.92142
chr1	52546556	52547232	0.365327	6.39105	6.55763	3.89798	8.80436
chr1	52655524	52655869	0.504502	2.98431	2.17261	1.56058	3.17002
chr1	52687091	52689010	0.961421	18.4866	16.4571	15.9253	15.7939
chr1	52704692	52705578	0.303744	17.2238	14.7023	13.5832	17.2001
chr1	52775883	52776414	0.280036	8.72841	4.92408	3.99736	6.37098
chr1	52783286	52784433	0.631394	8.72022	3.18449	6.29444	3.32055
chr1	52804818	52806066	0.982614	17.6764	19.3647	15.9357	17.5286
chr1	52850638	52851051	0.478638	5.67055	4.01371	3.46934	8.03916
chr1	52873583	52874749	0.339642	18.8991	15.3099	13.7684	16.7695
chr1	52901913	52902399	0.265143	5.75956	4.89935	4.57251	5.4533
chr1	52910609	52911537	0.802522	12.4297	12.45	11.117	13.409
chr1	53011637	53012783	0.854344	16.0379	7.0389	6.08192	14.7466
chr1	53089387	53089920	0.477785	7.96345	2.98553	1.82412	7.96334
chr1	53109630	53110649	0.132641	22.0947	20.3651	21.0584	18.8479
chr1	53150026	53150479	0.282807	5.74031	2.40063	1.6669	4.53091
chr1	53329373	53330340	0.932426	16.0482	10.9771	9.25398	14.9696
chr1	53353610	53354351	0.837258	7.14235	4.53434	5.44677	3.75131
chr1	53370041	53370546	0.415918	10.3426	6.80947	4.84041	8.70612
chr1	53409276	53409943	0.826524	10.1365	8.56573	9.77635	7.70369
chr1	53769189	53769529	0.919754	5.88936	1.09218	3.19989	2.83685
chr1	53772032	53772840	0.67737	17.708	12.1086	15.4363	9.866
chr1	53841641	53842011	0.949467	2.30435	1.9446	0.944141	0.741706
chr1	53947069	53947772	0.0558264	25.7587	20.6637	17.7306	21.5562
chr1	53965658	53966498	0.254971	19.9218	18.6084	16.0534	17.5445
chr1	53984308	53985246	0.366393	16.0032	16.5362	12.1192	15.4261
chr1	54095705	54096414	0.756001	11.8762	5.24797	5.6692	9.43602
chr1	54307217	54307794	0.0880378	3.79327	3.17926	1.88698	3.26961
chr1	54389782	54390428	0.845269	8.99231	4.71808	3.90644	9.37381
chr1	54437842	54438964	0.535525	23.1999	14.9295	13.0931	21.17
chr1	54493894	54494326	0.64685	2.38469	0.923445	0.821936	1.5615
chr1	54534750	54535133	0.164495	4.49796	3.41095	3.60989	4.62161
chr1	54548933	54549589	0.838069	22.0388	19.6023	14.296	19.7403
chr1	54570376	54571421	0.977258	16.9148	13.5962	10.661	17.336
chr1	54612131	54612797	0.772506	11.9224	13.0276	9.46521	10.5053
chr1	54722244	54723335	0.429833	15.2287	17.4013	13.1998	16.4591
chr1	54763186	54764254	0.908909	21.2543	12.9435	12.3688	19.7181
chr1	54770078	54770581	0.51686	4.21873	7.12324	4.52886	1.78384
chr1	54793702	54794150	0.851822	6.3475	3.19577	3.74439	3.92454
chr1	54812647	54813131	0.262335	5.35693	9.63535	3.35155	8.85686
chr1	54889005	54890256	0.991303	4.82905	6.54073	5.84714	5.30952
chr1	54969660	54970388	0.72974	15.8617	8.87074	6.0026	12.7418
chr1	54982681	54983759	0.0423216	22.7565	14.4377	19.1122	13.5263
chr1	54990048	54990484	0.762838	4.81391	3.3149	2.59874	5.73982
chr1	54991523	54991988	0.194952	4.67369	2.3241	2.11442	2.51192
chr1	55015369	55015900	0.83827	12.6182	4.75121	6.15317	10.322
chr1	55035976	55036731	0.802376	5.76175	9.6722	4.09463	9.09967
chr1	55040075	55040784	0.83876	13.4576	12.0527	10.6175	13.4044
chr1	55051647	55052011	0.878098	4.48874	2.40225	2.36333	1.65042
chr1	55064976	55065527	0.301653	12.2666	7.01917	6.87786	6.78519
chr1	55069384	55069960	0.314512	10.352	9.33058	10.9035	8.43873
chr1	55082390	55083139	0.970253	14.7458	11.3932	10.4521	11.6538
chr1	55099152	55099540	0.0399932	5.93953	2.93245	4.09321	6.03668
chr1	55109119	55110405	0.914937	11.1794	7.83107	6.0298	7.49268
chr1	55118411	55118657	0.541444	1.7011	1.17944	1.21723	1.9218
chr1	55133537	55133758	0.691825	2.48968	1.77026	1.5547	1.69279
chr1	55138811	55139424	0.461376	12.9385	10.6755	8.70415	10.2262
chr1	55142759	55143349	0.627608	9.16921	7.48384	6.38677	6.51687
chr1	55144188	55144631	0.937187	2.43887	4.47583	3.94896	2.36921
chr1	55144915	55145420	0.533529	3.44227	2.51517	1.17629	2.05405
chr1	55146334	55146822	0.899252	5.31311	2.90048	3.13068	3.95651
chr1	55192686	55193100	0.260835	7.4134	6.72937	4.61425	4.67506
chr1	55218844	55219126	0.326498	3.18033	0.742782	3.14744	2.80832
chr1	55236879	55237428	0.751032	7.24727	2.77612	4.11941	3.84139
chr1	55242611	55242939	0.374096	4.93562	1.57476	2.09814	4.25197
chr1	55249549	55250185	0.165033	17.5491	6.23767	7.74368	15.6857
chr1	55293836	55294700	0.0147596	12.5311	11.6965	10.3429	7.74316
chr1	55294867	55295268	0.0621036	2.88191	2.27351	1.39791	1.9279
chr1	55295498	55296701	0.26725	18.7798	18.447	15.0012	17.7968
chr1	55322259	55322723	0.161093	5.7157	3.19514	0.681792	4.38502
chr1	55357851	55358425	0.870914	6.85615	3.61408	2.19737	8.02721
chr1	55439948	55440651	0.225459	27.4818	24.6996	23.0378	25.6299
chr1	55461034	55461735	0.201357	19.2703	18.7355	14.022	16.9381
chr1	55486624	55486859	0.732667	3.2521	0.832621	3.58575	2.50664
chr1	55504462	55504938	0.0260495	4.87431	4.52664	4.48184	5.16803
chr1	55793111	55793808	0.54683	16.2282	10.0643	6.61203	15.1882
chr1	55812533	55813114	0.183589	10.5183	4.13987	2.68754	11.0448
chr1	55894799	55895684	0.32789	15.2519	8.38326	5.41622	14.5042
chr1	55930596	55932341	0.915524	21.6538	18.7711	14.228	21.4572
chr1	55943022	55943785	0.0240181	24.0083	18.8054	13.3352	19.7481
chr1	55947387	55948066	0.774717	8.24005	5.4249	3.33188	7.93
chr1	55962060	55962583	0.94483	10.0304	5.45819	4.01547	8.92518
chr1	56016929	56017685	0.0247997	21.9555	9.1561	8.50199	22.2061
chr1	56251987	56252491	0.962745	9.0927	3.96799	2.82191	8.93335
chr1	56400944	56401378	0.677118	4.66534	1.54163	1.47167	3.91028
chr1	56533709	56534171	0.97098	6.87121	1.5582	1.23802	6.20199
chr1	56612842	56613233	0.310622	5.2922	3.09945	1.10744	4.74746
chr1	56810219	56810440	0.534592	9.27915	1.08325	2.60732	6.57679
chr1	56910238	56910624	0.0783148	5.94958	5.50112	0.905106	6.39789
chr1	56911108	56911449	0.606755	4.94178	1.79215	1.33368	3.74349
chr1	56954958	56955777	0.557843	7.73365	6.75989	6.0012	7.64844
chr1	57033701	57034816	0.735366	18.5133	15.7694	14.9763	15.1659
chr1	57048379	57049337	0.883114	15.9694	13.4996	10.0089	15.8769
chr1	57051784	57052685	0.516638	8.12845	3.87948	3.36953	7.20027
chr1	57105750	57106034	0.656157	3.02773	2.15059	1.36713	2.33436
chr1	57262187	57263164	0.452602	21.8738	18.6032	16.344	21.3285
chr1	57326509	57327159	0.510945	6.22468	2.35595	1.48764	6.57911
chr1	57389484	57389839	0.264248	4.74744	1.72168	1.11026	3.1163
chr1	57395610	57396730	0.894105	18.2664	11.4101	7.57861	18.4088
chr1	57434403	57434995	0.2214	3.25903	1.77049	1.79267	2.18019
chr1	57450762	57451863	0.711604	18.0977	20.0658	16.9803	17.6967
chr1	57460494	57460851	0.62269	5.11345	3.90439	5.1475	2.94322
chr1	57463266	57463611	0.629708	4.37119	2.7009	3.39455	1.81375
chr1	57480304	57481112	0.388337	10.5031	10.056	6.55113	11.4574
chr1	57485143	57486272	0.182723	17.8863	14.2532	13.2532	15.7514
chr1	57830651	57832541	0.701602	20.9426	14.1648	14.7326	13.3985
chr1	57833750	57834065	0.714345	3.24681	3.54481	1.83172	3.2548
chr1	57852514	57853159	0.381381	6.11498	5.63615	3.65368	6.59109
chr1	58006004	58006645	0.829455	13.5822	11.5801	6.72923	13.239
chr1	58025909	58027420	0.962514	23.6575	19.7335	19.976	17.9853
chr1	58068773	58069083	0.723212	3.84456	2.91671	2.2015	3.20881
chr1	58080445	58080888	0.457338	3.92294	3.26264	2.80881	2.98462
chr1	58087674	58088740	0.992449	26.2151	24.1518	22.0875	23.159
chr1	58095178	58095596	0.312561	3.91024	2.19762	2.00624	2.41174
chr1	58136594	58136990	0.0786053	3.08513	1.76545	3.91283	2.50006
chr1	58169308	58170417	0.117023	11.5935	9.91709	10.864	13.1599
chr1	58195785	58196284	0.804953	10.1725	3.50728	4.72055	7.04848
chr1	58197372	58197923	0.899264	8.1048	2.4225	4.56856	5.25742
chr1	58201455	58202290	0.309014	9.45043	4.29098	3.76888	6.81805
chr1	58213353	58214163	0.259343	20.0688	16.8429	13.2427	18.8496
chr1	58292171	58292724	0.330538	6.9031	4.29445	2.60188	5.74807
chr1	58297107	58297546	0.418591	5.38353	2.5549	3.4921	6.19106
chr1	58327984	58328647	0.408378	17.5143	18.6257	16.0989	18.3434
chr1	58352841	58353906	0.427113	22.4868	18.7747	17.0213	18.8914
chr1	58363594	58363964	0.587087	5.25225	3.6675	4.697	5.05009
chr1	58394603	58395057	0.802549	4.50985	2.89376	4.69855	4.75401
chr1	58397968	58398844	0.932949	5.59702	5.52591	3.1105	6.4234
chr1	58403674	58403959	0.221157	3.27679	2.09513	0.992273	1.82957
chr1	58410383	58410629	0.567915	2.95695	3.67245	2.99756	1.81995
chr1	58416421	58416899	0.0208269	7.56892	10.2498	8.78643	4.53844
chr1	58448067	58448918	0.0184481	13.3633	14.9885	10.3963	11.2337
chr1	58449706	58451151	0.951211	8.11759	5.65452	7.10724	4.98514
chr1	58452141	58452672	0.125732	8.1577	6.13309	7.03259	7.31053
chr1	58452904	58453505	0.350437	12.6195	7.61183	7.56453	9.25321
chr1	58458493	58458996	0.413032	7.89287	3.41938	3.9425	2.78288
chr1	58472277	58472806	0.12708	7.00553	5.3576	5.12578	8.13882
chr1	58477762	58478242	0.107836	9.02559	7.5066	3.79613	7.49507
chr1	58501551	58502466	0.268121	11.8652	8.46727	8.1259	7.83026
chr1	58505093	58505709	0.113821	7.83751	5.23263	3.24779	4.2927
chr1	58530915	58531267	0.466019	2.36194	2.32047	1.79761	2.33804
chr1	58533502	58533956	0.230579	5.36926	3.69723	5.4571	2.45016
chr1	58555505	58556083	0.659474	12.624	8.72614	6.88474	11.987
chr1	58561560	58561992	0.0227289	2.99687	2.10414	1.38758	1.33313
chr1	58617101	58617760	0.50355	8.97185	5.29157	3.88839	6.40495
chr1	58619016	58619856	0.833306	17.0499	11.1378	10.7177	14.1151
chr1	58635959	58636683	0.0107941	18.1378	15.2252	16.7488	17.6929
chr1	58641072	58641607	0.132454	13.6789	12.683	10.3037	13.6834
chr1	58642742	58643298	0.993475	3.35322	2.73406	2.2188	1.55921
chr1	58657752	58658134	0.540026	3.89369	2.58018	3.37232	1.73706
chr1	58671299	58671654	0.442836	1.26211	4.31623	4.47263	3.20219
chr1	58675691	58675997	0.429882	6.36861	1.22616	3.51765	3.06909
chr1	58709306	58710015	0.449848	5.90534	4.62848	5.1514	2.15016
chr1	58734197	58735077	0.76981	22.6225	16.2003	18.4848	16.3295
chr1	58754433	58755004	0.315832	13.3233	8.90283	10.8236	8.05984
chr1	58766877	58767528	0.271449	8.51679	3.6954	6.13977	5.20939
chr1	58768172	58768914	0.599421	3.63595	2.44171	2.96679	1.82234
chr1	58769888	58770433	0.614548	3.9889	8.26699	4.58788	3.50731
chr1	58771983	58772541	0.499968	4.68562	2.36253	1.91088	1.97839
chr1	58803675	58804397	0.19957	11.7342	11.1763	12.0362	10.3929
chr1	58818201	58818803	0.894058	22.9244	18.6636	19.4081	18.237
chr1	58826565	58827254	0.990203	10.0033	12.0155	10.9008	8.54734
chr1	58835030	58835433	0.336347	6.55894	6.77686	4.4779	5.51892
chr1	58852105	58852654	0.586548	7.50277	7.48193	5.56692	6.32925
chr1	58859214	58859784	0.830906	7.71905	4.40969	4.33863	5.78468
chr1	58877446	58877699	0.0288119	3.19372	0.854573	4.12077	3.68815
chr1	58954568	58954821	0.594736	3.66371	3.80963	2.76194	3.0581
chr1	59029790	59030256	0.429525	4.44227	3.16678	3.45665	3.78488
chr1	59030436	59031093	0.173265	3.39636	2.49582	2.05542	2.05775
chr1	59050411	59051098	0.0838279	11.4622	12.0446	8.46431	10.284
chr1	59065949	59066562	0.593234	14.0699	9.00554	10.7086	10.3286
chr1	59124486	59125329	0.468909	17.2093	16.4253	14.0965	15.846
chr1	59127436	59128225	0.695272	11.6451	6.9696	6.49055	11.5394
chr1	59176381	59176995	0.803251	3.97468	3.301	4.27266	2.1431
chr1	59197786	59198089	0.904825	3.54039	3.69789	2.41702	4.41831
chr1	59199567	59200698	0.181902	16.5149	17.454	14.7895	17.9805
chr1	59201195	59202011	0.72204	14.4696	10.8224	9.49232	13.141
chr1	59207287	59207762	0.28846	4.72855	1.70045	2.59636	4.63494
chr1	59227164	59227600	0.162212	9.2912	5.8782	3.38854	6.69852
chr1	59294374	59295683	0.164524	13.342	14.0952	11.598	12.7923
chr1	59300606	59301004	0.291846	5.88373	4.05437	3.34859	3.79894
chr1	59304317	59304974	0.852984	17.1825	10.624	8.87586	13.1056
chr1	59343180	59343998	0.403629	12.5343	6.40756	4.92842	11.425
chr1	59368046	59368498	0.18034	6.50207	3.01876	1.49899	3.98515
chr1	59373005	59374105	0.213021	14.8621	18.0767	13.5117	15.4852
chr1	59418411	59418763	0.475172	3.28195	2.33989	1.6238	2.26677
chr1	59444610	59445047	0.0155461	4.85443	6.48947	2.66871	3.17748
chr1	59481002	59481325	0.497445	2.52838	1.96401	0.738589	2.18656
chr1	59484096	59484376	0.733466	3.41538	1.9271	1.76325	3.18021
chr1	59500954	59501525	0.417394	3.44606	3.04684	2.8999	2.46457
chr1	59538140	59538790	0.521041	4.13534	2.21643	2.94149	4.17344
chr1	59538832	59539906	0.466531	4.98409	3.35983	4.60381	2.96226
chr1	59544441	59544762	0.266876	1.7413	2.93238	1.79759	0.513827
chr1	59574724	59575345	0.668953	3.26274	1.64386	1.48548	2.25774
chr1	59580198	59580627	0.518808	5.25297	1.52768	2.49836	4.57048
chr1	59621416	59621748	0.483932	3.30405	2.79434	1.33743	2.29483
chr1	59625104	59625458	0.830399	3.11783	2.9462	2.77555	2.8111
chr1	59637673	59638339	0.621835	11.9562	17.4252	17.1618	11.4865
chr1	59641218	59642321	0.450248	18.6221	15.4193	13.4046	17.9121
chr1	59665630	59666820	0.334392	9.30472	3.72851	4.53407	9.81159
chr1	59667800	59668211	0.34146	7.04303	4.55034	6.06759	4.6828
chr1	59670439	59671242	0.505775	16.1019	6.16974	6.19056	14.5052
chr1	59680017	59680944	0.0139817	21.221	23.4268	21.1306	21.2627
chr1	59695207	59695479	0.141299	4.35043	2.75356	3.07918	5.91452
chr1	59707491	59708411	0.624876	9.52383	1.95926	0.839468	7.30555
chr1	59713109	59713452	0.977702	5.38304	6.33654	5.8416	2.46727
chr1	59718057	59718586	0.775684	4.35939	2.2353	2.17364	2.14762
chr1	59741778	59742101	0.27023	3.80054	3.33387	4.00377	3.15771
chr1	59742330	59742604	0.373932	3.19081	1.13412	3.21856	1.90275
chr1	59744448	59744796	0.319068	4.12084	1.9608	2.3442	3.61684
chr1	59746300	59746757	0.932359	5.62347	2.35846	2.86812	2.63438
chr1	59747275	59747845	0.272058	10.5629	7.39684	9.27273	7.11351
chr1	59752045	59752425	0.521169	3.17645	2.86059	2.61566	2.34551
chr1	59758269	59759154	0.232501	9.95841	7.99385	7.11927	7.65093
chr1	59776646	59777394	0.992548	13.21	11.9132	9.58882	13.0353
chr1	59782718	59783227	0.836996	3.08259	2.30952	2.44532	3.9522
chr1	59819729	59820939	0.551056	9.44446	3.75325	10.1276	3.71204
chr1	59821335	59821804	0.718325	5.2289	5.18472	4.86844	4.87774
chr1	59846738	59847230	0.945316	7.87545	4.79221	4.38101	5.22286
chr1	59869592	59869941	0.702677	2.9502	2.65045	3.13367	2.30666
chr1	59879227	59879476	0.467261	3.06998	2.72129	2.40525	3.97009
chr1	59891859	59892109	0.715536	0.644128	0.634936	2.06164	-0.644528
chr1	59893473	59893728	0.524101	1.2374	0.96616	1.54396	1.46797
chr1	59919365	59919997	0.276346	7.88442	5.93418	4.51145	5.95668
chr1	59939850	59941153	0.0934656	19.4967	19.9594	17.7872	19.5607
chr1	59949704	59949962	0.0348439	4.18637	0.524896	3.4608	3.61695
chr1	59966146	59966602	0.421493	5.58641	1.7199	2.54545	3.58442
chr1	59969253	59970723	0.367741	8.92409	4.58296	8.04977	3.84314
chr1	60024145	60024699	0.748343	7.46397	6.94418	6.58084	7.36391
chr1	60029911	60030326	0.593808	5.4998	4.04384	3.31869	4.13213
chr1	60052531	60052918	0.479569	3.55643	2.37321	2.7833	3.65179
chr1	60057052	60057908	0.0704404	11.8096	13.0227	12.6357	12.8235
chr1	60062224	60062762	0.60459	5.21874	2.83808	3.11917	2.54868
chr1	60065410	60065836	0.69197	3.62895	1.65747	1.8118	2.27818
chr1	60111337	60112092	0.176903	14.5921	8.95212	8.04926	11.5613
chr1	60155023	60155637	0.832829	4.37741	1.41643	2.5159	2.39168
chr1	60157681	60157979	0.658895	4.46885	2.71663	2.49505	2.41146
chr1	60158652	60159057	0.740557	4.01576	3.29365	2.64605	3.67148
chr1	60161365	60161954	0.569378	9.62287	6.00555	6.02929	5.22056
chr1	60164296	60164608	0.749581	4.31551	3.17912	2.63179	1.72924
chr1	60192448	60192893	0.935195	3.75677	2.04921	1.50991	3.43896
chr1	60209513	60209931	0.74587	4.47333	4.22484	4.34443	2.49764
chr1	60215010	60215890	0.837212	14.1814	9.73666	7.29258	13.3701
chr1	60216937	60217442	0.198796	5.5433	2.28149	2.01297	2.83575
chr1	60223701	60224098	0.61429	4.11656	1.98204	1.70614	3.66846
chr1	60236821	60237774	0.887153	6.65279	4.87512	4.44648	4.22947
chr1	60250637	60251054	0.937621	4.43006	4.16252	4.75481	3.83274
chr1	60253551	60254048	0.930454	5.42472	3.55463	2.8277	2.74414
chr1	60262612	60263075	0.301614	5.7422	2.50277	3.25089	3.59623
chr1	60289545	60289902	0.155661	2.22129	3.30126	4.57191	3.63132
chr1	60296048	60296594	0.615366	2.83025	2.34648	2.89033	2.51141
chr1	60303854	60304185	0.971273	3.48954	1.69301	1.57558	1.63028
chr1	60329171	60329795	0.818262	11.152	10.3843	9.92372	10.6617
chr1	60397708	60398145	0.204426	5.20853	4.78233	3.2279	3.54286
chr1	60399878	60400377	0.808448	3.73267	1.91015	1.40208	1.15449
chr1	60416926	60417345	0.474068	1.36969	1.42669	1.25885	0.907662
chr1	60461619	60462185	0.365502	7.08386	8.91586	5.5578	8.12136
chr1	60466682	60467145	0.602442	4.91668	2.33412	3.50323	2.18952
chr1	60468130	60468571	0.599242	6.86485	4.47153	4.11836	4.12504
chr1	60480525	60481224	0.751053	10.5345	6.66776	6.29877	8.09903
chr1	60484820	60486444	0.786756	17.617	12.1485	9.76421	15.2398
chr1	60498283	60498640	0.201728	4.98742	0.663756	3.68498	2.5616
chr1	60511530	60511896	0.811331	3.43849	3.6888	2.9732	4.63479
chr1	60586867	60587369	0.980792	8.52805	3.50567	5.31248	4.82587
chr1	60591636	60592135	0.427124	8.96368	9.05497	5.7902	10.2201
chr1	60615486	60615873	0.873197	2.58616	1.10857	2.0229	2.12713
chr1	60622024	60623950	0.361169	12.74	10.236	11.1116	9.58471
chr1	60777111	60777415	0.878077	3.58118	1.82041	2.11738	4.06185
chr1	60879714	60880401	0.989991	21.3812	11.2774	9.8318	17.6487
chr1	60910333	60910624	0.544676	3.61346	1.17178	3.73686	3.3129
chr1	60917207	60918251	0.2967	16.0404	19.2493	14.7955	17.1718
chr1	60925032	60925890	0.150617	12.9119	8.16199	5.91086	10.3613
chr1	61011518	61012388	0.682154	16.1842	8.08101	6.12353	16.9711
chr1	61015029	61015666	0.468244	9.06096	3.69233	4.18836	7.6601
chr1	61017878	61018594	0.121828	15.2305	13.7618	9.08471	16.8747
chr1	61018806	61019463	0.45082	7.39343	4.4595	4.23045	7.13759
chr1	61111694	61112524	0.0117422	16.448	14.9191	9.92187	18.7055
chr1	61158173	61159059	0.951969	12.7359	4.33856	4.02948	12.1262
chr1	61237652	61238552	0.0661776	18.7011	11.4852	10.0721	18.3757
chr1	61354356	61355396	0.232808	15.5075	13.6154	10.1773	13.3862
chr1	61433667	61434434	0.587171	23.595	21.4475	19.6892	20.7222
chr1	61571448	61571902	0.209618	8.56831	3.4587	6.24037	7.03022
chr1	61685156	61686320	0.555895	10.145	5.85977	5.49509	6.30334
chr1	61787611	61787865	0.709835	5.96244	1.85926	3.07798	3.23658
chr1	61817666	61818444	0.0245168	26.0969	25.7093	20.9267	23.6678
chr1	61818631	61818852	0.0569417	-0.34086	0.872255	1.78042	2.27594
chr1	61971342	61972033	0.280792	21.3303	19.9894	13.0816	19.6747
chr1	62013576	62014217	0.989109	9.7644	3.51095	2.82663	8.53381
chr1	62066084	62066577	0.798813	10.0116	5.52255	3.48198	8.67004
chr1	62124573	62124954	0.633725	6.28091	2.8531	2.84173	4.30691
chr1	62221672	62222072	0.719055	3.69898	2.51564	1.62327	3.16134
chr1	62424813	62425406	0.721447	12.7649	5.25925	4.66733	11.0608
chr1	62469993	62470769	0.54905	3.00081	2.30472	1.89855	3.58458
chr1	62743498	62744253	0.60822	20.0051	21.9572	16.526	21.0201
chr1	62747370	62748334	0.198827	21.7633	19.8423	16.1371	21.4108
chr1	62749422	62749813	0.771233	2.97221	2.40145	3.40839	3.53653
chr1	62749955	62750350	0.0179669	2.75823	2.51279	1.18021	1.33504
chr1	62752918	62754646	0.756559	6.58803	6.0049	6.10808	5.3204
chr1	62768962	62769640	0.106151	22.01	13.8498	13.0782	21.86
chr1	62821477	62821849	0.239968	3.85947	2.88519	3.05971	4.09747
chr1	62829873	62830120	0.721622	7.79844	0.670255	3.6143	3.77738
chr1	62832165	62833445	0.0751558	16.584	19.3746	16.1507	18.6655
chr1	62842024	62842668	0.694185	7.87545	3.83558	5.1703	6.21098
chr1	62866685	62867176	0.58234	11.9599	10.7777	11.8591	9.1694
chr1	62975893	62976963	0.0966563	18.5337	14.2992	12.8298	18.4926
chr1	63010754	63011557	0.548369	21.6681	15.651	12.9427	19.4901
chr1	63013154	63014389	0.321185	7.50845	4.00315	4.64824	6.79076
chr1	63029243	63029787	0.773849	6.24614	2.13605	2.45154	3.25633
chr1	63030732	63031619	0.375393	14.8921	8.15531	8.35735	14.2225
chr1	63032760	63033527	0.0168435	20.1619	22.3066	21.074	19.4064
chr1	63050831	63051140	0.70889	3.33087	2.28303	2.8189	2.7204
chr1	63052208	63052567	0.415486	3.19594	1.8628	3.24693	2.30763
chr1	63114113	63114383	0.690327	2.31353	0.75038	1.41701	0.65694
chr1	63127363	63127789	0.983112	4.77146	2.34641	2.05967	3.31825
chr1	63135156	63135671	0.00796585	13.8365	8.92585	10.4444	12.8652
chr1	63147487	63147842	0.0633816	2.34203	1.43607	3.87802	2.04057
chr1	63157235	63158066	0.420535	17.3874	16.4706	12.587	18.3804
chr1	63160430	63161789	0.137884	12.6898	13.569	12.412	11.8818
chr1	63162345	63163021	0.417394	5.54895	2.40553	2.67219	2.14607
chr1	63204966	63205229	0.19889	2.85199	1.21817	1.8129	0.136336
chr1	63206974	63207345	0.814942	3.19265	2.25723	2.48379	2.383
chr1	63219922	63220270	0.0478408	2.68528	1.5909	4.11549	2.24119
chr1	63226812	63229987	0.95989	21.458	19.5326	16.906	20.5163
chr1	63250904	63251360	0.874137	5.16888	1.91864	1.70517	4.89454
chr1	63449824	63450771	0.112598	17.1601	10.9044	7.64018	15.0768
chr1	63492458	63493315	0.881768	4.38768	2.79684	3.52922	1.80656
chr1	63601325	63601741	0.0297615	3.62693	2.76842	2.22923	2.46646
chr1	63656150	63656579	0.53579	5.94047	2.73919	2.0453	5.30223
chr1	63703550	63703889	0.192522	0.389815	1.59269	2.35809	2.15766
chr1	63703955	63705721	0.527283	15.6297	15.7921	13.1199	14.0395
chr1	63705831	63706601	0.327741	11.9613	15.5096	10.0082	12.6144
chr1	63715142	63715727	0.319446	13.9594	14.8117	15.2585	12.8534
chr1	63776856	63777141	0.784416	2.70655	2.78219	2.51017	1.84851
chr1	63795012	63795292	0.0292393	3.2314	4.275	1.70322	0.435228
chr1	63809247	63810272	0.750465	16.048	15.2437	11.732	14.5089
chr1	63822857	63823452	0.583185	13.3427	11.9228	9.84553	10.4746
chr1	63901222	63901832	0.183729	10.1014	4.0219	1.74826	6.68329
chr1	63915923	63916303	0.919553	5.34754	2.97604	3.06796	3.31306
chr1	64000021	64000401	0.602232	5.11439	3.57124	3.76983	5.22431
chr1	64004728	64005130	0.899126	3.36807	0.900054	1.18761	1.69551
chr1	64023743	64024250	0.252932	5.02557	7.86776	6.45494	5.48271
chr1	64044606	64045152	0.594944	13.9829	9.66373	6.33031	12.2019
chr1	64067834	64068280	0.99536	10.0412	14.4211	11.9823	8.27426
chr1	64072944	64073345	0.705302	4.38541	3.79818	4.0715	4.52202
chr1	64083841	64084087	0.190085	1.79244	0.945863	2.38894	1.81995
chr1	64145014	64145310	0.694989	3.07947	2.21179	2.28634	2.73653
chr1	64168204	64168914	0.640942	12.9595	8.24853	10.2653	9.01314
chr1	64272802	64273257	0.925139	3.07246	4.89169	4.93268	3.66315
chr1	64289072	64289431	0.486268	3.42441	2.50067	3.6034	2.24259
chr1	64392554	64393020	0.139257	13.7868	9.92723	9.70417	11.2311
chr1	64465049	64465653	0.257849	10.6793	5.45916	3.80997	10.0572
chr1	64488928	64489201	0.275733	2.04635	3.76713	2.5193	2.58557
chr1	64490071	64490437	0.914474	2.93648	2.93236	2.01743	2.98863
chr1	64492490	64493025	0.626565	15.0143	13.3778	12.6829	13.1332
chr1	64494589	64495375	0.00987107	12.338	15.624	9.35846	10.8981
chr1	64508191	64508599	0.449561	4.7091	1.74717	2.36786	3.08625
chr1	64578758	64580272	0.912306	5.13516	3.61697	4.78385	2.48538
chr1	64580659	64581039	0.041811	5.05518	5.56976	3.22899	3.94541
chr1	64590313	64590937	0.741573	11.2114	8.19174	7.95454	10.354
chr1	64604265	64604512	0.398537	2.20214	2.18353	1.79582	0.819304
chr1	64618759	64619170	0.731853	4.11812	3.36908	3.6351	2.90221
chr1	64644730	64645111	0.548072	3.49787	3.27778	1.61699	2.96549
chr1	64663655	64665139	0.852098	22.6799	19.0649	18.7571	17.2456
chr1	64683199	64683514	0.184119	3.19623	0.0560284	2.5016	1.69568
chr1	64737052	64737314	0.165552	2.91823	1.75058	2.05308	2.03739
chr1	64738636	64739062	0.888594	4.90794	2.82265	2.48958	3.33094
chr1	64748215	64748735	0.53085	6.55913	2.84622	2.0512	8.71769
chr1	64751065	64751286	0.193866	0.39377	2.56276	1.5547	2.27594
chr1	64751483	64752513	0.105981	19.9676	17.8934	13.8513	19.3531
chr1	64756303	64757078	0.24625	25.6357	21.2352	23.9062	18.349
chr1	64763824	64764661	0.671061	25.2909	21.7391	17.812	21.4265
chr1	64782379	64784442	0.752494	13.4114	10.032	12.5695	9.03046
chr1	64785065	64785653	0.968621	11.595	11.9267	11.8533	9.32307
chr1	64804021	64804440	0.770672	3.16237	2.19239	1.13954	1.83237
chr1	64842428	64842674	0.507356	2.32902	3.31631	2.56905	2.11845
chr1	64855564	64855994	0.507494	8.9222	9.68157	7.60815	7.56358
chr1	64873029	64873378	0.936085	4.23798	4.01322	2.67204	3.46773
chr1	64960349	64960867	0.451648	6.54366	3.2149	3.04627	6.72109
chr1	64965185	64966316	0.634474	14.9762	15.2806	14.0171	14.3146
chr1	65032657	65033464	0.963563	14.4028	7.76872	7.93752	12.464
chr1	65056493	65057586	0.695818	21.7962	22.3674	18.2393	22.4182
chr1	65092401	65093659	0.26327	13.9403	14.7982	15.8623	14.0946
chr1	65122058	65122639	0.0664091	8.48407	5.93204	4.89712	7.56924
chr1	65158352	65159172	0.391295	19.2754	23.3428	18.4387	19.6406
chr1	65208848	65209212	0.338675	4.4308	2.30835	3.26406	3.8326
chr1	65224527	65227139	0.91019	23.8178	22.7517	21.3113	21.3104
chr1	65231976	65232611	0.470994	11.9929	8.32669	4.6831	10.6894
chr1	65233099	65233705	0.530557	8.73317	5.17391	6.45682	4.26268
chr1	65329106	65330190	0.972811	14.0867	8.84205	7.00394	14.179
chr1	65356461	65357195	0.351485	7.23211	3.1452	1.99939	5.53365
chr1	65357819	65359940	0.514333	14.1868	13.3101	9.50306	15.5758
chr1	65434728	65435466	0.340243	20.6033	8.48094	7.82758	19.6521
chr1	65701029	65701468	0.760638	6.79672	6.24447	4.25097	7.08605
chr1	66033099	66033601	0.345667	3.74218	2.07933	1.34999	3.07426
chr1	66146276	66147053	0.951374	13.6769	15.2394	9.81829	19.1107
chr1	66150953	66151525	0.516409	7.70606	13.4929	7.17098	13.4807
chr1	66151771	66152136	0.522642	10.4092	15.1342	10.5268	15.2933
chr1	66326760	66327110	0.178711	3.19487	2.49806	3.25149	4.35429
chr1	66702231	66703119	0.907702	13.1978	14.3569	7.84698	14.6575
chr1	66725200	66725624	0.704665	4.30733	4.53078	2.0826	6.51111
chr1	66747437	66748018	0.5956	11.6706	6.2628	6.89671	7.16759
chr1	66779718	66780089	0.137784	3.73087	1.82882	2.60337	1.53717
chr1	66798715	66799124	0.34216	6.06518	5.54779	2.74245	4.37242
chr1	66851967	66852931	0.903987	7.67328	6.48763	5.35961	9.2996
chr1	66859676	66860253	0.762253	11.3936	7.44759	8.09092	7.55935
chr1	66863716	66864167	0.877517	8.4141	7.03662	19.9042	1.73861
chr1	66865449	66865743	0.0867571	3.30268	2.90257	1.81131	2.65144
chr1	66885009	66885646	0.943503	21.0435	26.9512	20.6997	22.3094
chr1	66894113	66894396	0.895227	2.36651	3.56208	1.01906	3.25427
chr1	66909212	66909886	0.0794716	3.45635	1.53933	1.53325	1.24679
chr1	66921677	66922106	0.22872	6.90232	4.27352	1.30688	6.82017
chr1	66942114	66943073	0.946302	16.1006	21.1714	13.7971	19.2954
chr1	66987428	66988350	0.990408	18.1693	23.058	14.5253	20.9844
chr1	67039156	67039842	0.51482	18.2729	13.2245	10.8755	17.6299
chr1	67060172	67061495	0.931452	11.8513	12.4076	9.68421	12.2903
chr1	67085249	67085547	0.000152602	3.2585	2.56953	0.203558	0.571473
chr1	67107541	67108766	0.650469	21.2734	23.9502	20.213	20.4577
chr1	67190135	67191136	0.968559	14.2376	15.8984	10.257	16.9541
chr1	67227334	67228451	0.120831	22.7214	18.4103	15.8112	22.3406
chr1	67264638	67265362	0.737216	7.61515	4.52878	2.59541	10.2278
chr1	67524273	67525122	0.640399	14.2026	11.6166	6.49079	13.386
chr1	67567928	67568711	0.816479	9.37045	3.12567	2.95381	8.52933
chr1	67605654	67606146	0.852172	10.8279	4.57207	2.81176	8.23898
chr1	67686586	67687548	0.565153	9.90691	14.4056	8.07655	13.3071
chr1	67690155	67690755	0.0134307	6.55955	4.9946	4.19609	5.97762
chr1	68152773	68153705	0.445155	9.99525	6.3581	3.1085	11.2894
chr1	68194971	68195298	0.947214	5.44789	4.7352	1.98604	6.70979
chr1	68197144	68197595	0.986798	7.5313	6.37061	4.077	8.53679
chr1	68544235	68544655	0.949805	3.08564	1.63225	1.86433	1.55039
chr1	68799326	68799698	0.648466	6.03428	2.17001	2.20844	3.30215
chr1	69111541	69112080	0.688001	3.79997	3.25277	1.42226	4.17556
chr1	69132703	69132964	0.824161	3.1572	3.0218	1.31734	5.0579
chr1	69135906	69136404	0.56867	9.27644	6.91072	4.45128	10.0533
chr1	69165171	69165713	0.356395	7.28703	2.05765	1.40404	6.83136
chr1	69185369	69186252	0.321071	19.6471	19.5132	16.5196	17.2768
chr1	69211483	69212207	0.955078	13.9033	9.3483	6.04347	12.7104
chr1	69285997	69286300	0.0676105	2.64679	2.93877	0.896532	1.78044
chr1	69288229	69288884	0.879835	28.5591	32.9792	25.6736	26.3569
chr1	69377902	69378533	0.304917	16.7777	16.8916	10.809	14.6974
chr1	69416684	69417078	0.974919	6.16819	2.51915	2.63558	4.85249
chr1	69535203	69535530	0.0663483	4.45775	2.16645	1.44202	1.78172
chr1	69657700	69658067	0.805353	3.96938	2.65896	2.25373	2.91214
chr1	69731345	69731812	0.36935	6.87714	3.31258	1.99832	5.72845
chr1	69735470	69736280	0.645615	25.922	23.7067	17.3408	24.6629
chr1	69804171	69804745	0.0256806	10.8629	4.70883	1.5002	7.42682
chr1	69822121	69822632	0.783629	17.0179	7.68022	5.80631	14.0122
chr1	69831308	69832256	0.205486	18.0206	17.3641	13.7922	16.7036
chr1	69836699	69837307	0.703126	21.5363	22.8901	19.0247	19.1999
chr1	70043362	70043874	0.000535544	5.43926	4.20898	2.2895	3.15805
chr1	70174255	70175204	0.322489	18.1412	16.4343	13.8541	18.4197
chr1	70266631	70267104	0.13619	3.8452	1.78596	1.9493	3.78205
chr1	70316121	70317308	0.348326	13.0407	13.3664	9.05401	13.9667
chr1	70833609	70834160	0.717445	11.8511	3.85676	4.66953	10.4398
chr1	70853123	70853515	0.195149	2.98498	1.89534	1.42992	1.75244
chr1	70879809	70880339	0.704195	14.8786	5.09902	4.83302	11.8618
chr1	71083380	71084000	0.604934	10.9506	4.84478	5.67478	8.63418
chr1	71117171	71117656	0.83261	7.0344	3.31448	2.22205	8.15418
chr1	71235224	71235611	0.178942	4.29775	2.63526	1.83579	2.55356
chr1	71316413	71317139	0.172156	7.04534	6.03826	3.4991	6.99198
chr1	71336012	71336730	0.229604	23.5826	17.4401	12.9388	19.356
chr1	71517432	71517873	0.271836	7.93243	3.43894	2.82042	4.30411
chr1	71552381	71553316	0.0388777	14.8775	16.5391	14.5197	15.1202
chr1	71578071	71578744	0.917544	23.9277	18.4799	17.4047	20.2748
chr1	71582915	71583208	0.158299	1.98388	2.71621	1.74098	4.69102
chr1	71624703	71625078	0.934105	5.14365	4.65331	4.48631	4.94948
chr1	71633950	71634393	0.208815	5.43666	3.06451	4.94047	5.1917
chr1	71699238	71699799	0.0774873	3.33258	2.13952	2.14904	1.74057
chr1	71700136	71700671	0.825793	6.08621	3.75129	3.88453	4.57569
chr1	71721781	71722509	0.833532	14.9598	6.76844	5.83495	12.8873
chr1	71769347	71770378	0.398936	6.07026	6.45776	3.25773	6.4414
chr1	71824898	71825286	0.525826	6.18479	3.32452	3.06268	4.70547
chr1	71826138	71826564	0.843245	6.89467	1.76983	2.69795	5.49537
chr1	71933791	71934122	0.531439	3.57731	2.79415	4.47716	1.70605
chr1	72030453	72030849	0.252583	6.32061	3.14674	3.74412	5.12246
chr1	72037037	72037388	0.262285	4.17251	1.34691	2.5145	3.08025
chr1	72170040	72170971	0.199979	14.2773	20.0981	14.3368	16.6919
chr1	72171709	72171971	0.400721	3.25599	1.72452	3.40816	2.08522
chr1	72188001	72189077	0.935464	24.8419	23.9928	22.6116	22.8538
chr1	72212683	72213263	0.0727211	6.69637	3.42535	4.68552	4.77218
chr1	72213677	72213991	0.139609	6.58585	2.04188	4.24155	5.63396
chr1	72229342	72229987	0.329028	4.25175	8.82561	7.57563	7.02245
chr1	72258417	72259366	0.160231	18.6394	12.8476	14.6157	10.3588
chr1	72266458	72267205	0.256069	14.2644	12.2232	10.6885	13.5479
chr1	72271398	72271734	0.511638	3.04029	2.6832	3.20451	2.66782
chr1	72272379	72272647	0.508464	3.01563	2.60552	1.7792	2.21927
chr1	72273532	72273877	0.023213	4.80043	3.63863	2.54185	1.85011
chr1	72278980	72279808	0.925944	12.4437	10.7388	8.75724	11.9249
chr1	72290177	72290603	0.715692	5.66851	3.04471	4.99348	3.21719
chr1	72291576	72291972	0.88798	2.58436	2.26761	2.36986	1.6758
chr1	72298976	72299293	0.0685769	1.96716	0.237099	3.71112	2.28441
chr1	72301673	72302066	0.95607	6.48326	6.3385	5.69462	4.53623
chr1	72330437	72331395	0.84651	8.66813	8.46882	8.61516	6.79854
chr1	72335599	72335958	0.73144	2.27554	1.64543	1.76266	1.8131
chr1	72352790	72354027	0.87448	22.5824	20.2418	18.1688	19.4184
chr1	72359736	72360872	0.628919	18.5864	19.6802	13.8183	16.8214
chr1	72421020	72421312	0.991747	2.26654	1.87157	2.69797	1.09238
chr1	72427067	72427520	0.618235	11.6618	5.21017	7.88495	6.13484
chr1	72483505	72483975	0.300669	4.79571	2.23515	2.5056	4.10771
chr1	72580017	72580406	0.120675	5.16629	1.58916	1.05546	2.42981
chr1	72602961	72603330	0.146611	4.34932	2.45161	3.8971	1.68146
chr1	72611148	72611655	0.938845	5.44838	8.51994	8.74581	4.08813
chr1	72621651	72622353	0.0358722	15.2811	11.4276	10.145	15.4843
chr1	72656976	72657446	0.419079	7.32029	3.82268	3.20258	5.28357
chr1	72757135	72757695	0.791444	5.04005	5.16948	7.10564	3.67949
chr1	72762996	72764299	0.616213	21.7292	19.287	18.2268	21.9945
chr1	72765148	72766167	0.0774226	19.1849	13.777	10.4305	17.8801
chr1	72901289	72902487	0.385773	20.386	20.3833	18.17	18.348
chr1	72912170	72913005	0.306092	24.0258	28.384	22.9232	25.7857
chr1	72922458	72923139	0.246466	13.7827	8.03309	5.60805	12.7973
chr1	72924066	72925042	0.133328	16.0076	12.4025	11.0832	13.8269
chr1	72925797	72926250	0.437551	8.97538	4.12309	3.70315	7.39821
chr1	73070176	73070533	0.392445	4.49511	2.16521	3.45215	1.58215
chr1	73321010	73321535	0.536883	5.62739	1.52578	1.57675	4.4986
chr1	73349880	73350120	0.562921	3.4596	1.2088	3.30344	2.63369
chr1	73665036	73665658	0.448042	14.3774	10.0426	7.33661	14.0583
chr1	73676942	73677343	0.854024	3.6699	5.7335	5.4007	3.99876
chr1	73730369	73730681	0.598933	3.98065	5.44026	4.26865	3.05044
chr1	73761997	73762579	0.687822	10.9299	5.90325	3.48542	13.0151
chr1	73783566	73784415	0.159355	15.9056	8.77057	10.1001	10.8264
chr1	73872736	73873627	0.180997	27.386	24.5804	23.4439	21.3952
chr1	73897581	73897913	0.601414	4.87634	1.82001	3.54396	1.66316
chr1	73909285	73909881	0.592201	9.19042	7.63444	8.77554	7.28862
chr1	73947799	73948586	0.195602	19.5494	19.8202	15.6498	18.3822
chr1	73948869	73949435	0.827591	6.78462	16.5835	6.17643	15.4277
chr1	73952233	73952475	0.915652	1.51635	1.92287	2.84069	1.31715
chr1	73956905	73957137	0.290718	1.74078	1.97597	3.63192	2.72412
chr1	73972801	73973264	0.916648	6.41376	10.9307	8.39933	6.45596
chr1	74013029	74013391	0.0455036	4.25064	3.57051	3.48069	1.89727
chr1	74033186	74033754	0.761037	16.5224	22.2213	14.423	20.281
chr1	74042598	74043606	0.260586	22.1162	20.8855	19.4008	20.5075
chr1	74054402	74055012	0.927529	2.55995	3.97703	2.45956	2.00416
chr1	74055881	74056147	0.968485	1.76731	2.40896	1.64697	1.36038
chr1	74059871	74060184	0.680539	1.59557	2.51227	2.03878	2.11877
chr1	74071335	74071837	0.308556	6.94429	5.01151	5.75567	4.9259
chr1	74083462	74083714	0.0804094	3.12275	3.85178	3.27815	1.16566
chr1	74084187	74084563	0.930556	4.01175	1.19546	1.63843	0.829995
chr1	74094116	74094634	0.938866	4.97792	8.2282	6.05015	4.41722
chr1	74104761	74105497	0.900895	5.84906	6.91508	5.31027	4.07924
chr1	74106064	74106352	0.859648	1.81166	1.92119	0.981973	1.2133
chr1	74108433	74109071	0.155547	4.85216	2.14006	2.14293	2.85332
chr1	74113001	74113492	0.217368	2.17419	2.22915	1.81042	0.913675
chr1	74116093	74116345	0.103897	2.12703	1.00471	0.262791	0.383962
chr1	74116573	74116989	0.251279	4.33587	6.23273	3.81836	5.01043
chr1	74123747	74124939	0.3977	11.3826	15.9281	9.18408	16.0785
chr1	74129163	74130248	0.510801	18.4132	18.8592	15.462	19.815
chr1	74144869	74145301	0.281648	3.39197	3.12653	2.7763	2.9277
chr1	74146755	74147113	0.908052	3.28994	2.75267	4.01651	2.334
chr1	74157997	74158308	0.477295	2.41322	2.15855	1.05217	0.806919
chr1	74170763	74172336	0.772853	17.5832	15.9016	14.3501	12.7806
chr1	74177794	74178215	0.0323437	4.23438	4.61848	3.39025	3.45983
chr1	74178538	74179022	0.275983	5.1137	10.0747	9.06883	3.86306
chr1	74185823	74186665	0.671732	13.4101	7.93202	7.04689	14.6318
chr1	74229562	74229962	0.635398	4.82298	5.24069	3.37395	5.48831
chr1	74232884	74233409	0.633672	4.51853	5.02477	6.10672	2.76214
chr1	74242153	74243335	0.615079	21.0114	15.5654	16.6791	18.742
chr1	74250102	74250463	0.0511249	5.07512	1.26393	4.67535	3.86436
chr1	74252142	74253090	0.0151055	18.3307	19.6321	14.5848	17.5959
chr1	74294306	74294770	0.403612	4.53819	2.60672	2.99316	5.51405
chr1	74299313	74299606	0.665334	2.30839	2.03812	2.30967	0.562763
chr1	74315314	74315885	0.0458429	6.38925	4.22423	3.07511	4.27519
chr1	74325829	74326111	0.967424	3.44273	2.55938	2.43918	2.50335
chr1	74331025	74331574	0.523687	9.96125	6.64484	7.55085	4.94968
chr1	74333304	74334325	0.947716	9.61505	9.41673	8.91761	8.78624
chr1	74341608	74342124	0.378721	5.85353	10.3284	8.28104	2.96668
chr1	74350339	74351201	0.0875213	8.85359	6.86257	6.88953	7.52566
chr1	74359478	74360379	0.484922	18.7053	21.7462	16.0726	17.8271
chr1	74364890	74365263	0.346841	2.26827	1.26768	1.30976	1.31733
chr1	74373476	74373998	0.718851	10.0217	6.80111	5.51407	6.58717
chr1	74378757	74379253	0.317344	6.90518	3.97095	4.4692	4.44999
chr1	74407440	74407844	0.863435	2.71318	2.52464	2.65258	1.54953
chr1	74408202	74409231	0.130057	18.7604	16.6857	17.0215	15.6728
chr1	74433041	74433848	0.299061	24.3546	17.4257	15.4896	18.4679
chr1	74437034	74438268	0.298404	13.2302	11.4642	9.96686	12.6797
chr1	74438451	74439098	0.436184	3.19927	1.54176	2.04451	1.43462
chr1	74439571	74440133	0.769129	7.89218	5.17039	4.58828	7.49884
chr1	74443334	74443712	0.234211	3.22793	1.51169	2.79005	3.37803
chr1	74443811	74445405	0.995939	25.617	22.0623	22.0083	20.2532
chr1	74454537	74454906	0.550061	3.17053	0.586653	1.44415	2.34725
chr1	74455136	74455523	0.569599	5.74649	6.07877	2.28119	7.35445
chr1	74468692	74469000	0.247635	2.55681	2.15732	1.09878	1.31513
chr1	74488324	74489211	0.504388	6.01567	4.90618	5.15353	6.52405
chr1	74499071	74499966	0.818163	17.6603	17.7607	15.1924	16.2548
chr1	74502829	74503228	0.843967	6.88302	3.98568	5.58109	3.97377
chr1	74506307	74507457	0.295891	18.6874	18.2621	15.7399	17.3292
chr1	74510929	74511197	0.427521	3.42971	2.20206	1.01318	1.69125
chr1	74547319	74547638	0.759636	3.18125	1.50302	2.13958	2.30944
chr1	74553099	74553349	0.131242	2.90982	2.38728	2.28367	0.780984
chr1	74586892	74587224	0.443744	2.8143	2.06359	2.22341	2.38665
chr1	74616634	74617083	0.810572	2.68939	2.12874	2.75887	1.95791
chr1	74634220	74634996	0.31476	6.80187	5.00055	4.65655	4.8505
chr1	74650386	74650994	0.700228	4.78635	2.95176	4.1502	4.43171
chr1	74690171	74691124	0.279295	10.3324	14.2014	10.779	11.4876
chr1	74708092	74708797	0.503164	12.2684	11.6752	15.4251	7.53353
chr1	74710891	74711326	0.691093	2.0643	3.30678	1.44251	1.76513
chr1	74718483	74718740	0.614697	2.86185	2.58377	3.23641	1.19182
chr1	74720969	74721550	0.664174	8.23373	3.54705	4.22765	4.64661
chr1	74721813	74722117	0.717037	3.1682	2.15377	1.09475	5.11125
chr1	74757730	74759138	0.8523	11.1984	8.53545	7.96126	9.21372
chr1	74759451	74760447	0.139247	12.8119	12.6528	8.95661	11.701
chr1	74770051	74771071	0.0409908	13.6026	9.52554	10.4097	11.3132
chr1	74790443	74790887	0.862392	3.08293	2.31311	2.21421	2.43651
chr1	74794977	74796431	0.992713	22.2446	18.4671	15.4971	20.8723
chr1	74803289	74803818	0.340121	3.2988	3.1999	2.98304	3.16191
chr1	74806245	74807052	0.704999	19.044	18.8955	15.8548	16.7433
chr1	74809506	74810190	0.731058	20.6755	20.6231	14.5081	21.3719
chr1	74813592	74814014	0.150153	5.79434	3.92831	3.68445	2.82262
chr1	74822162	74823221	0.511662	12.6157	13.5697	9.5646	13.6075
chr1	74830298	74830548	0.0514361	2.99971	3.20884	2.06164	0.387021
chr1	74830656	74831765	0.0780216	25.9783	21.9024	22.5207	22.4498
chr1	74833880	74835031	0.797305	13.1328	12.9858	9.18694	12.6739
chr1	74835162	74835632	0.977045	3.85573	5.84802	6.05226	4.37107
chr1	74836840	74837419	0.741514	2.18708	4.58059	4.48287	2.95439
chr1	74838261	74838924	0.284195	4.74734	4.04671	5.50828	2.03916
chr1	74849173	74850493	0.297221	28.9897	21.6367	20.7525	20.7573
chr1	74852502	74856089	0.838298	16.9196	16.9086	15.8584	15.3988
chr1	74860554	74860994	0.14681	5.38945	6.19274	4.96133	7.84052
chr1	74861385	74862042	0.580552	10.3227	7.21056	6.26953	7.82076
chr1	74862701	74863359	0.112108	4.65855	3.52873	3.98739	4.02998
chr1	74870231	74870596	0.767544	2.37949	1.73863	2.29676	1.69984
chr1	74901414	74902175	0.96852	4.63083	2.55399	4.34692	1.51026
chr1	74908317	74908798	0.478508	10.3408	4.5425	7.8894	7.67343
chr1	74919844	74920267	0.226023	4.02042	1.15052	1.05038	2.00586
chr1	74926946	74928217	0.518806	20.476	19.836	17.9107	19.8295
chr1	74939513	74942435	0.509835	14.7226	15.6021	12.8778	19.439
chr1	74947747	74949090	0.963729	18.4549	16.5836	15.7414	18.9545
chr1	74962271	74963009	0.571958	13.0911	7.17928	7.13429	11.1509
chr1	74970848	74971638	0.256162	8.10096	6.79397	5.00399	8.09472
chr1	74972749	74973887	0.573928	22.7135	17.4846	17.2502	20.4463
chr1	74994648	74998857	0.886231	10.8783	9.3874	9.46322	9.24743
chr1	75000582	75001222	0.447105	9.77963	5.43772	5.77609	8.79951
chr1	75010600	75011689	0.806074	21.5442	18.1721	17.7804	17.4115
chr1	75020110	75020570	0.997758	7.25479	6.8633	6.60614	8.74456
chr1	75046913	75047592	0.176757	27.0833	17.486	16.6044	25.7174
chr1	75063277	75064665	0.534259	18.9908	20.5302	17.1836	18.6291
chr1	75071957	75072333	0.245642	1.91611	0.71061	2.6285	1.87917
chr1	75075313	75075905	0.290516	3.45796	1.93039	2.84461	4.59371
chr1	75098058	75099460	0.405054	9.29129	10.49	7.41218	9.98359
chr1	75118716	75120109	0.0868721	5.89377	4.23661	4.44088	5.33102
chr1	75120707	75121495	0.0105528	23.4728	21.9829	24.5428	20.7585
chr1	75128261	75128720	0.504543	5.45803	2.8027	2.11756	2.39618
chr1	75136753	75137115	0.436482	3.63693	2.10863	3.68068	1.91699
chr1	75137778	75138390	0.689406	3.28687	1.72856	1.35217	2.33793
chr1	75139010	75139973	0.12446	29.0727	20.7014	23.2057	17.4546
chr1	75157618	75158096	0.874997	4.33099	1.8019	2.56836	1.69676
chr1	75165320	75165961	0.852371	2.88437	2.91571	3.58963	3.05007
chr1	75178648	75179316	0.642206	12.4495	8.79114	8.89653	9.63799
chr1	75188049	75188586	0.847241	3.33362	3.42838	4.30444	1.76139
chr1	75211161	75211554	0.554423	2.58017	3.68682	3.857	1.88944
chr1	75215718	75216698	0.153141	23.7703	18.2883	18.7797	17.1338
chr1	75228941	75229563	0.376936	7.5259	3.45482	5.00407	6.09267
chr1	75231049	75231940	0.129211	27.1199	24.8653	24.4053	25.6182
chr1	75233210	75233478	0.290501	2.85314	2.20206	1.821	0.869005
chr1	75237128	75237435	0.644024	2.96949	1.13316	3.1991	1.9791
chr1	75244583	75244968	0.588921	1.96763	2.6134	2.49439	2.79038
chr1	75248104	75249104	0.476288	26.0129	23.3333	21.8867	21.3808
chr1	75249492	75250123	0.0793952	9.65044	5.15634	7.20623	8.37858
chr1	75250550	75251852	0.122811	20.3745	18.2786	17.5917	17.2064
chr1	75260759	75261017	0.648876	2.36447	3.47583	5.00858	0.784507
chr1	75287068	75288052	0.727647	17.2718	16.4685	14.0346	17.7031
chr1	75291356	75291847	0.9786	6.07837	2.45555	3.91495	2.76659
chr1	75304435	75304811	0.878276	3.5829	2.75609	2.30302	3.46268
chr1	75313163	75314039	0.40808	7.02843	7.64014	6.0939	5.68334
chr1	75314328	75315291	0.853474	22.329	23.6783	19.6827	22.1362
chr1	75323993	75324428	0.265213	6.09587	3.00414	3.16646	6.02106
chr1	75339192	75339976	0.327367	29.7562	30.9601	27.1072	26.5792
chr1	75367780	75368414	0.58172	12.5691	4.77035	5.53195	11.1905
chr1	75395011	75395846	0.0538697	23.214	12.094	11.6607	19.5227
chr1	75410102	75410855	0.788757	17.1591	8.64784	8.24081	19.3445
chr1	75421864	75423137	0.120943	19.8592	14.0124	15.0768	18.109
chr1	75432663	75433131	0.565556	3.01836	2.98885	4.77198	2.40384
chr1	75441755	75443181	0.0524036	16.5808	17.1382	17.8067	14.4261
chr1	75453127	75453969	0.895662	20.087	10.5604	9.9001	20.0068
chr1	75454987	75455370	0.930334	3.24832	1.78952	2.07325	2.77669
chr1	75463703	75464894	0.12691	16.1197	18.0816	15.8758	16.7799
chr1	75473260	75474638	0.51043	32.2904	27.4028	26.687	27.8288
chr1	75474997	75476401	0.710018	4.68519	3.53912	3.5338	2.37792
chr1	75491186	75492446	0.91854	19.6476	15.1498	13.6605	19.9782
chr1	75495729	75496541	0.561809	15.3872	8.33643	7.65599	14.5415
chr1	75527173	75527527	0.098285	3.32701	2.28809	0.658255	1.71708
chr1	75542788	75543657	0.416293	9.96328	4.34914	8.41506	5.68769
chr1	75555669	75556868	0.103672	28.8418	25.2055	21.8061	24.933
chr1	75593439	75593882	0.974215	3.28994	1.80757	1.06528	4.52356
chr1	75593969	75594846	0.985966	24.3229	24.8376	19.1122	21.4333
chr1	75632434	75632864	0.719973	7.81211	6.39076	5.6708	5.84891
chr1	75648938	75650724	0.31089	18.4583	19.4195	15.2881	20.6067
chr1	75678430	75678856	0.701296	3.2316	2.05344	1.51241	4.11405
chr1	75689922	75690517	0.186809	3.22054	2.70275	1.12047	3.13158
chr1	76841995	76842550	0.132072	9.12172	1.71776	4.8962	4.52108
chr1	76917264	76917660	0.313595	4.4809	1.96977	1.71044	4.00379
chr1	77078160	77078903	0.567716	16.4668	11.4152	10.1398	14.2008
chr1	77180349	77181244	0.440668	12.0236	6.66975	5.01449	11.1796
chr1	77328237	77328700	0.812887	4.4082	2.77854	2.31529	3.21255
chr1	77429702	77430135	0.385456	3.92778	4.6711	3.87381	3.66246
chr1	77493150	77493564	0.279736	3.111	3.50715	2.11923	2.68632
chr1	77510010	77510448	0.358203	8.72964	7.67698	5.08527	7.65099
chr1	77510691	77511447	0.264969	11.8516	9.08744	7.22201	8.24688
chr1	77511984	77512314	0.532521	3.50008	3.55847	2.20288	2.19469
chr1	77512533	77513531	0.240799	26.1008	24.2136	22.6158	22.3794
chr1	77558344	77558825	0.807988	8.45692	3.60153	2.22883	7.83763
chr1	77585803	77586726	0.251371	11.5931	4.49495	4.56704	12.421
chr1	77687988	77688461	0.649904	9.22036	4.21304	3.61703	8.7362
chr1	77801748	77802124	0.298331	4.28602	3.17882	4.72533	3.64387
chr1	77875478	77875909	0.511984	4.85113	10.8333	11.2633	2.76381
chr1	77892666	77893478	0.0270464	23.2412	20.644	19.6132	19.584
chr1	77927024	77927962	0.671804	17.1905	9.10301	9.90734	14.4534
chr1	77939298	77940276	0.113417	18.863	20.0119	16.3215	20.1478
chr1	77968807	77969614	0.00403787	23.5048	17.9616	17.378	20.9869
chr1	77974908	77975960	0.767517	18.5912	22.9329	18.3682	19.0717
chr1	78005322	78005753	0.732879	6.40689	2.38272	3.54376	6.07681
chr1	78212040	78212707	0.80236	9.62638	5.39067	4.45876	7.65792
chr1	78227197	78227802	0.2163	8.4676	3.93726	2.81989	5.10348
chr1	78264042	78264525	0.0975384	10.4952	3.74833	3.66907	7.98357
chr1	78306869	78307495	0.731313	4.93228	2.77501	2.80536	4.10665
chr1	78309849	78310096	0.306609	2.79531	3.33057	3.43492	2.08806
chr1	78322302	78322823	0.716306	7.49375	2.69851	1.92973	4.85003
chr1	78415985	78416868	0.319135	18.5014	19.353	15.0146	17.3826
chr1	78450882	78451926	0.64637	19.2701	17.5722	15.7115	19.0577
chr1	78482720	78482941	0.619664	2.05991	0.488877	2.65797	2.41367
chr1	78485070	78485413	0.905265	3.79545	1.82159	3.10661	1.03506
chr1	78521441	78522672	0.00976964	25.2231	16.9511	14.7362	21.9971
chr1	78532780	78534149	0.480688	9.74357	11.6037	11.5898	10.5351
chr1	78553862	78554341	0.46917	7.81557	2.77755	4.05968	6.98618
chr1	78598595	78599104	0.845648	5.68689	3.42507	3.95124	6.08879
chr1	78626334	78626685	0.905149	2.95614	1.82725	3.21031	1.08301
chr1	78654205	78654724	0.375027	3.57645	2.46063	1.94797	1.24145
chr1	78670792	78671056	0.628187	2.84123	2.87334	2.43698	2.23232
chr1	78683226	78684037	0.214403	17.179	12.7596	11.6288	15.8127
chr1	78684715	78685174	0.249881	6.21001	7.76858	7.80655	6.29713
chr1	78703691	78704388	0.70521	17.0638	6.79734	8.62215	13.7662
chr1	78720784	78722076	0.740745	15.6529	16.314	13.443	12.852
chr1	78722293	78722831	0.665701	14.4145	6.94895	5.43292	12.8533
chr1	78843067	78843436	0.533034	5.42777	1.95758	1.44415	3.39692
chr1	79436490	79437037	0.118379	18.6864	5.92379	8.07665	14.2729
chr1	79510103	79510734	0.729705	11.8926	2.84434	2.04367	10.885
chr1	79610966	79611482	0.278844	6.32534	4.4449	3.40225	5.81509
chr1	79636689	79637194	0.030763	12.6062	8.85503	9.27553	13.5707
chr1	79668269	79668534	0.642532	1.74391	1.1725	1.84154	1.68995
chr1	79679309	79680502	0.912755	10.1662	14.5379	9.29758	12.6933
chr1	79695537	79695935	0.881147	3.70104	3.56189	2.60916	3.93862
chr1	79757675	79757941	0.766229	3.01358	3.84022	0.917322	2.2156
chr1	79758555	79758814	0.237123	2.66629	2.83852	2.65495	2.22687
chr1	79772321	79773071	0.251163	2.47449	2.41189	2.20123	1.86039
chr1	79778881	79779582	0.889082	15.4428	12.0257	10.8973	12.6709
chr1	79783046	79783566	0.420328	16.2124	15.3538	9.77791	17.7355
chr1	79853585	79853834	0.996036	1.11857	3.6558	2.9391	2.95609
chr1	79854494	79855609	0.185619	3.53252	3.24152	5.05277	1.76276
chr1	79995644	79996025	0.122339	4.38617	2.39254	2.37461	1.76997
chr1	80030943	80031386	0.779761	3.54081	2.25657	1.16547	4.49523
chr1	80102740	80103509	0.785393	11.2951	8.87319	7.17976	11.5589
chr1	80146311	80146792	0.826008	5.25279	2.56337	2.65634	3.65585
chr1	80149692	80150222	0.707251	8.59261	3.25089	2.96684	5.00143
chr1	80174583	80174957	0.501763	3.28367	4.17066	2.64252	3.61532
chr1	80176585	80178068	0.214387	18.3743	18.0727	14.7742	17.8897
chr1	80205230	80205726	0.957229	9.65515	2.88138	1.74696	10.0938
chr1	80227176	80227639	0.31469	6.90502	2.47323	1.24747	5.93673
chr1	80240649	80241147	0.824377	9.52886	5.82552	3.64793	7.89133
chr1	80296185	80296481	0.889002	3.45451	1.40208	1.96783	1.61651
chr1	80366067	80366372	0.329602	3.08412	0.897889	1.76457	1.46905
chr1	80372110	80372420	0.509715	1.94343	3.38507	1.86117	3.02961
chr1	80404906	80405723	0.85362	17.6477	13.3531	10.6515	15.356
chr1	80411893	80412364	0.698082	4.44002	2.55354	2.07564	4.09901
chr1	80501186	80501861	0.884856	14.3619	9.08627	10.1795	12.4641
chr1	80508982	80509723	0.0783663	17.1775	19.9411	13.7685	18.441
chr1	80512289	80513271	0.0289002	11.0106	12.1688	11.0499	11.3609
chr1	80518751	80519216	0.285435	6.5113	4.33563	3.4882	7.82893
chr1	80533756	80534306	0.0537701	4.90292	2.65394	1.8885	3.03824
chr1	80573434	80574049	0.970542	8.67653	6.27414	4.41929	9.33475
chr1	80627262	80627665	0.834273	4.47539	1.42522	2.09465	4.02783
chr1	80719014	80719918	0.784218	16.6351	10.1784	8.99363	15.2547
chr1	80724700	80725118	0.562086	6.00781	2.3026	1.71339	5.48438
chr1	80826598	80827478	0.790778	15.012	11.6604	7.72845	15.1396
chr1	81283525	81284446	0.066505	14.4479	14.4081	15.3801	16.5394
chr1	81297275	81297804	0.533218	10.3646	10.643	10.2419	9.70955
chr1	81297976	81298883	0.189847	14.7902	11.4678	8.95826	15.5528
chr1	81299947	81300441	0.960476	6.21813	3.67888	1.85524	4.46797
chr1	81303825	81304925	0.536081	10.3206	5.45901	4.75329	11.1525
chr1	81306120	81307078	0.214953	14.5374	17.5214	15.4953	17.1818
chr1	81312553	81313752	0.0851545	15.7283	14.3609	13.6868	14.2331
chr1	81316296	81316758	0.865304	6.44183	2.46377	3.52294	4.17869
chr1	81512460	81513717	0.874932	16.7228	16.4073	14.1707	15.7852
chr1	81588164	81588641	0.951344	10.7184	9.45141	6.67392	10.0323
chr1	81685236	81685669	0.527799	4.09889	2.91664	2.96308	4.28803
chr1	81913349	81913595	0.193877	2.80662	1.91948	0.968837	0.771697
chr1	82285210	82285610	0.891933	3.94043	1.78916	1.95732	3.0267
chr1	82286522	82288774	0.562572	8.42543	7.38959	11.6043	5.6608
chr1	82288909	82289189	0.647992	1.81139	1.32539	1.58492	3.02664
chr1	82290584	82291339	0.180271	20.1419	19.4555	15.5243	19.3481
chr1	82368260	82368481	0.143449	1.49254	1.34313	2.45757	2.27594
chr1	82378349	82378940	0.882558	11.5473	10.7239	8.35996	14.1264
chr1	82429806	82430855	0.0133044	19.2893	19.2164	16.4056	18.7734
chr1	82472779	82473356	0.533629	13.8363	5.8545	5.38394	12.518
chr1	82550573	82551515	0.149951	11.1263	11.3893	12.7765	11.2364
chr1	82568178	82568873	0.555161	18.7585	8.99917	9.23905	14.462
chr1	82572634	82573207	0.674718	7.4085	3.08398	3.64695	5.82019
chr1	82634974	82635311	0.36895	4.49829	2.05334	2.27224	1.56412
chr1	82638019	82639305	0.509284	20.1446	19.5342	17.1481	19.9812
chr1	82720576	82720862	0.0269019	3.136	1.34545	0.270837	0.125411
chr1	82755974	82756725	0.237568	12.0873	8.16266	8.25459	10.5636
chr1	82758804	82759392	0.508471	15.5696	8.20461	7.50489	12.5986
chr1	82769699	82770012	0.352803	3.26749	1.46625	1.8792	2.53106
chr1	82783816	82784435	0.972844	23.213	23.2597	20.3753	18.3518
chr1	82789928	82790535	0.782919	12.1069	11.5653	8.55205	10.4897
chr1	82791408	82791921	0.386332	4.88187	6.79462	4.45169	5.3837
chr1	82799971	82800723	0.0742619	12.2753	12.538	9.62682	15.4804
chr1	82810983	82811391	0.504933	3.2118	2.66476	1.51024	2.03116
chr1	82827315	82827599	0.842029	2.95353	3.72796	2.24624	2.03154
chr1	82828848	82829190	0.594694	3.31186	3.47394	2.75935	3.1086
chr1	82835556	82836430	0.149048	33.5902	23.3991	29.2248	21.7802
chr1	82837881	82838215	0.868119	4.91457	1.76822	3.22364	2.16849
chr1	82885036	82885435	0.988175	3.59896	1.7008	1.50206	0.687933
chr1	82909632	82910082	0.376939	5.66386	4.7572	2.74029	4.89186
chr1	82969757	82970594	0.506992	10.7677	7.84166	5.98577	8.63414
chr1	82983920	82984963	0.70691	17.0169	15.0454	15.8333	12.7345
chr1	83041666	83042192	0.71188	4.50995	2.34449	1.57376	4.65383
chr1	83061010	83061939	0.977233	14.9422	15.4014	13.8288	14.4077
chr1	83072313	83073426	0.974516	21.7023	12.8365	13.5688	18.3809
chr1	83113209	83113760	0.993067	11.7166	11.0529	10.8221	8.67438
chr1	83146590	83147446	0.47432	16.8956	10.4599	8.458	17.8505
chr1	83177504	83178528	0.220252	12.0079	11.9209	9.09755	11.8743
chr1	83181402	83181809	0.255094	4.47068	3.14311	1.86862	2.53415
chr1	83183459	83184570	0.00971813	19.2582	19.5925	13.9634	18.684
chr1	83214658	83215206	0.762016	5.0004	5.26479	2.81925	6.89417
chr1	83219569	83220033	0.589084	11.8933	5.02181	3.78271	9.62066
chr1	83713590	83714375	0.93639	12.7197	15.4934	9.81725	13.1972
chr1	83723435	83724570	0.353279	9.78914	14.1598	8.33643	14.7153
chr1	83732901	83733361	0.393045	9.24181	4.46319	2.59654	9.80153
chr1	83742127	83743160	0.431391	16.8597	16.4803	14.1612	16.2329
chr1	83807692	83808358	0.127056	13.7171	7.45754	8.27162	12.6592
chr1	84098524	84099201	0.980598	11.2167	5.69029	4.70522	12.9921
chr1	84125193	84125414	0.0926432	4.25745	1.41776	2.68329	4.60855
chr1	84150330	84151004	0.978075	9.5363	3.94183	2.74601	10.4448
chr1	84279589	84280273	0.36434	6.04745	6.84629	3.68153	7.5755
chr1	84280419	84281298	0.254046	2.86054	3.39551	3.50432	2.75644
chr1	84282977	84284147	0.666515	20.1727	19.9927	15.799	20.9072
chr1	84430062	84430562	0.963978	3.13797	5.33594	3.55579	4.89535
chr1	84466865	84467453	0.785066	11.5567	6.72273	7.77921	11.0295
chr1	84578262	84579027	0.074056	12.5032	7.88074	6.65051	10.9362
chr1	84693552	84694323	0.349494	13.0447	6.24715	4.37737	11.9366
chr1	84730043	84730983	0.248128	22.4113	24.8793	18.9564	21.6341
chr1	84738015	84738336	0.688829	4.14964	5.3911	3.9588	3.02107
chr1	84813714	84813970	0.729458	3.58985	3.50288	2.88092	3.42825
chr1	84828428	84828745	0.24152	4.22253	1.53402	1.85556	1.27791
chr1	84835903	84836213	0.924758	2.22906	1.52447	3.31128	0.393245
chr1	84836509	84837302	0.694611	7.08539	7.06614	6.57699	5.26967
chr1	84838270	84838800	0.95795	9.2467	6.21994	6.24854	6.5794
chr1	84861955	84862226	0.697939	2.71455	1.80396	1.08469	2.17487
chr1	84863237	84863744	0.1177	6.16077	2.89207	4.48213	7.43649
chr1	84866123	84866522	0.495675	3.8739	2.53907	1.72572	2.74206
chr1	84874001	84874371	0.0179869	5.92746	4.78992	2.80475	3.11653
chr1	84876397	84876787	0.668037	2.56632	2	2.16429	2.83735
chr1	84877726	84878404	0.950941	27.9939	26.2366	24.755	22.8504
chr1	84881637	84882340	0.361031	16.5398	10.9546	11.1982	12.6426
chr1	84882430	84882931	0.2141	11.027	8.4818	8.21783	11.5406
chr1	84929612	84930530	0.746185	13.6584	7.30589	6.22155	13.8366
chr1	84931532	84932070	0.170803	4.2866	3.99323	4.80301	5.5343
chr1	84991254	84991720	0.964685	9.45216	3.19001	6.15121	3.99662
chr1	85111200	85111963	0.970487	10.6013	1.84375	5.91702	4.57286
chr1	85239622	85240583	0.605299	6.00925	1.44289	2.12929	2.74014
chr1	85283675	85284283	0.582431	6.82607	1.28407	2.84292	1.9723
chr1	85319639	85320197	0.882476	9.15096	3.63373	5.46724	5.97325
chr1	87477893	87478506	0.749362	14.6118	8.41013	11.6155	9.9977
chr1	87632806	87634275	0.870807	16.3816	17.4933	14.237	14.7514
chr1	87634894	87635209	0.317876	3.57402	1.17859	3.31226	2.28173
chr1	87689498	87690997	0.0113739	21.3715	15.4473	16.2161	14.5655
chr1	87695819	87696364	0.967059	5.33862	2.88957	4.98587	3.02318
chr1	87698084	87698530	0.941391	4.75669	4.09565	3.18806	3.43126
chr1	87704599	87704939	0.021465	1.79175	1.49086	2.75905	2.58375
chr1	87707430	87707760	0.555371	2.36273	4.06929	2.50565	1.93395
chr1	87716253	87716738	0.615934	12.3204	11.1823	11.3869	9.10501
chr1	87738620	87739537	0.62743	18.7648	19.8564	18.6493	20.707
chr1	87748625	87748879	0.432018	1.99608	1.28804	0.8723	0.937962
chr1	87749435	87750542	0.460556	27.5327	27.0654	23.0791	27.7546
chr1	87750960	87751565	0.982493	5.39637	5.24372	4.3454	5.11529
chr1	87785288	87785705	0.0138316	4.16696	2.51855	1.73093	2.01752
chr1	87791891	87792914	0.921065	19.1021	15.9339	14.0603	17.7523
chr1	87795970	87796512	0.238884	6.4864	4.26258	4.34673	4.98035
chr1	87831667	87832582	0.566932	26.8218	22.0082	20.9999	21.6748
chr1	87904179	87905363	0.319724	14.3623	16.9414	12.295	15.0461
chr1	87955658	87956702	0.491603	24.74	22.3415	19.0202	22.2374
chr1	87958695	87959734	0.97405	10.4862	4.53295	6.43431	7.18711
chr1	87960436	87961573	0.553641	22.3106	21.8263	18.6938	18.1338
chr1	87990293	87990736	0.901098	7.63101	4.99302	7.08479	5.87204
chr1	87990877	87991294	0.926009	2.53997	1.83118	1.85081	2.53371
chr1	87994419	87994809	0.000259989	4.71914	3.5924	0.881468	1.66489
chr1	88046524	88046830	0.386723	1.4115	0.841002	2.57494	1.18313
chr1	88049101	88049737	0.110796	12.9355	9.03638	9.71029	11.0791
chr1	88075203	88076184	0.985756	34.0892	32.271	29.4254	31.0906
chr1	88085575	88085830	0.491407	3.34502	2.63073	1.7397	2.64794
chr1	88100581	88100957	0.899167	5.87552	2.62124	2.76141	3.82507
chr1	88110102	88111318	0.85389	24.7454	19.8232	19.905	22.4779
chr1	88169825	88170273	0.280415	6.14966	3.01512	5.45599	5.93077
chr1	88198221	88198916	0.3024	19.7241	9.9471	11.1506	15.0717
chr1	88210052	88210914	0.723609	14.6923	6.94399	7.26397	15.0345
chr1	88212147	88212485	0.19983	2.45948	1.76758	2.18406	1.83522
chr1	88235819	88237043	0.918537	16.0522	16.5868	13.003	16.2779
chr1	88237608	88237972	0.876703	2.58559	2.43981	4.45342	2.31048
chr1	88243396	88244225	0.932709	18.2198	14.4931	16.9438	13.18
chr1	88245291	88245787	0.508262	7.30803	5.15476	3.84163	5.4413
chr1	88256177	88256679	0.0064194	3.25723	2.44273	1.28292	1.20839
chr1	88260038	88260923	0.825134	14.1745	8.20467	7.88569	11.7341
chr1	88267353	88267812	0.256609	2.98547	1.65529	3.6793	1.91535
chr1	88268292	88269105	0.462368	27.7156	23.606	24.0145	23.8916
chr1	88277447	88278096	0.725846	25.6435	11.8269	11.9917	17.715
chr1	88285322	88286622	0.767466	21.9148	20.6425	17.4042	21.3431
chr1	88289388	88289951	0.268959	10.0148	4.15248	5.27098	4.763
chr1	88292394	88292984	0.515246	13.4309	5.90936	6.83925	10.3046
chr1	88297672	88298315	0.884624	8.73571	1.74559	3.69994	5.08149
chr1	88301306	88302111	0.26331	12.4682	7.35994	6.52729	11.2635
chr1	88312158	88313426	0.384234	24.5577	23.8341	20.0503	24.8171
chr1	88318563	88318894	0.825184	2.57929	0.836181	1.77732	1.09404
chr1	88326332	88327129	0.0169501	28.6601	23.5832	24.5377	21.4032
chr1	88335052	88335585	0.416677	10.1902	8.00991	5.21281	8.14852
chr1	88335773	88336518	0.118792	3.82734	4.32396	5.18657	3.52627
chr1	88336648	88337548	0.155164	19.8987	18.2892	17.1664	16.0029
chr1	88338709	88339128	0.553264	3.23175	2.9581	1.61677	1.62688
chr1	88367471	88368521	0.222545	14.9346	8.67155	7.31029	14.5863
chr1	88381289	88381812	0.0659668	3.9438	1.26671	0.424497	1.85646
chr1	88382861	88383492	0.719768	4.90591	3.13809	2.57199	4.40699
chr1	88384543	88384840	0.367515	3.02024	2.18136	1.34522	3.1858
chr1	88396325	88398726	0.991553	26.7461	24.356	20.0703	26.2081
chr1	88400227	88401256	0.0940335	24.4336	18.1337	20.0155	17.4412
chr1	88405577	88406511	0.440312	26.5447	20.6891	16.5953	22.2228
chr1	88416495	88417563	0.966021	20.5016	14.8645	14.119	17.5736
chr1	88421401	88425850	0.846681	19.526	16.8424	16.4683	14.376
chr1	88425870	88426301	0.305912	2.03119	2.24917	0.901924	2.13938
chr1	88428633	88429621	0.0348631	18.5369	16.0196	15.2952	15.8862
chr1	88429764	88430925	0.0510948	15.5603	13.0904	13.4444	12.5446
chr1	88433459	88433712	0.142626	1.74304	1.78562	3.30951	2.95906
chr1	88434883	88435504	0.301907	14.9929	12.79	10.0069	12.9015
chr1	88436066	88436732	0.915297	6.34171	3.59774	3.23814	5.21902
chr1	88483799	88484165	0.723126	3.742	1.71521	1.65244	0.548897
chr1	88494689	88495850	0.466705	16.2232	16.5457	14.6373	16.7086
chr1	88505882	88506502	0.790611	11.7127	8.70719	9.36848	8.24622
chr1	88508629	88509143	0.841464	7.49796	4.69176	4.03201	6.07853
chr1	88510527	88511303	0.860481	17.6389	14.1923	11.7874	13.7966
chr1	88512146	88512725	0.269774	6.84729	3.83406	5.40415	6.31182
chr1	88514146	88514419	0.76026	1.66898	1.35925	1.58437	1.59471
chr1	88514503	88515806	0.998393	19.2985	17.3284	16.7709	19.456
chr1	88517153	88517635	0.171589	7.4897	5.28999	5.22122	4.13226
chr1	88539710	88540045	0.127927	3.16405	2.00437	1.29202	2.97006
chr1	88546141	88547429	0.154264	18.5204	16.7112	15.3896	16.541
chr1	88549173	88549740	0.865185	8.38289	4.9338	5.25366	6.0653
chr1	88565552	88567311	0.419138	16.2198	10.3342	10.9798	12.2074
chr1	88592180	88592630	0.783025	4.79683	2.3862	1.25849	5.19092
chr1	88593498	88593970	0.831364	12.0061	5.43685	6.20289	10.0205
chr1	88595158	88595908	0.875809	15.1111	6.88125	6.86439	10.9799
chr1	88596297	88596749	0.499787	6.84444	2.92166	2.02725	6.59692
chr1	88600178	88600815	0.124381	8.75967	5.9781	6.64	4.95184
chr1	88759633	88759890	0.904693	1.5721	1.95498	1.09996	1.6936
chr1	88811245	88811702	0.618116	7.85235	3.48718	3.81705	5.90845
chr1	88864817	88865373	0.945279	6.01876	2.72175	2.04896	5.30056
chr1	88869282	88869643	0.48493	4.26238	3.58038	3.44506	5.21039
chr1	88936904	88939865	0.717725	18.1239	17.2245	16.1518	18.0734
chr1	88947890	88948437	0.664487	4.76767	6.77437	8.06639	2.75295
chr1	88957389	88958090	0.820317	10.8239	6.8351	8.68445	8.36787
chr1	88967166	88967909	0.167129	11.6594	3.23076	4.82663	8.47551
chr1	88983480	88983934	0.230622	4.3642	2.00868	3.53546	1.96021
chr1	88994930	88995697	0.879633	20.4918	8.92159	10.2577	13.8202
chr1	89008121	89008706	0.237051	5.02634	2.55879	6.85923	4.56272
chr1	89070581	89071550	0.878616	25.2754	17.8356	17.6727	20.1382
chr1	89071635	89072296	0.554534	3.25586	1.98891	1.23584	2.55862
chr1	89081025	89082570	0.733977	9.90174	8.47001	11.9777	8.10059
chr1	89082781	89084558	0.687128	15.8983	13.6983	13.9408	12.8756
chr1	89088409	89088844	0.36339	4.99528	2.18137	2.55312	2.37141
chr1	89102794	89103322	0.0790162	5.13703	4.18318	2.10428	2.85183
chr1	89110276	89110941	0.661694	4.99559	2.11076	4.25414	1.50393
chr1	89114102	89115182	0.0306059	21.2905	17.395	15.4305	18.8854
chr1	89135730	89136032	0.882934	4.04223	5.94219	4.55635	6.67009
chr1	89142012	89143334	0.501489	19.7588	17.89	17.7927	16.8566
chr1	89155066	89155443	0.389759	3.88551	2.3015	1.9141	3.25847
chr1	89178922	89179476	0.186349	7.67653	4.97527	4.90502	5.46227
chr1	89189351	89189912	0.834516	17.5678	12.2944	7.43964	19.7754
chr1	89190201	89190536	0.81994	4.10683	1.56235	1.45789	1.72318
chr1	89211989	89212717	0.999359	4.47297	5.65969	5.84199	3.5148
chr1	89223551	89224652	0.935114	17.4131	12.4735	14.6864	12.2079
chr1	89234622	89234938	0.404916	2.86443	1.15325	1.68561	2.19517
chr1	89238840	89239153	0.445201	2.32601	1.348	1.08128	1.84391
chr1	89240265	89240590	0.610047	4.37121	0.851571	3.65454	2.04078
chr1	89256261	89256725	0.281679	4.49271	4.04644	4.36989	4.16071
chr1	89261386	89261817	0.335892	3.62067	4.70859	4.69068	3.35062
chr1	89276462	89276938	0.821956	10.0294	6.76841	3.82796	7.55792
chr1	89296034	89296381	0.982333	3.28724	1.46908	2.84754	1.53975
chr1	89315043	89315950	0.4863	22.2185	22.5412	17.7757	24.6024
chr1	89343703	89344743	0.341668	25.962	23.2274	20.9598	23.1692
chr1	89364677	89365434	0.330736	8.45551	10.6241	7.42563	7.69988
chr1	89383164	89383494	0.843823	3.09967	2.05535	3.09422	1.24409
chr1	89437834	89438740	0.842082	13.522	10.2001	7.6422	12.7628
chr1	89464779	89465623	0.657493	13.4584	9.21793	7.70856	12.3779
chr1	89504832	89506123	0.175187	19.2664	15.7138	15.6598	17.8957
chr1	89560506	89561173	0.16311	13.0993	8.97105	8.72615	12.6133
chr1	89563516	89564062	0.923465	7.14181	5.41249	4.38689	7.78717
chr1	89592902	89593377	0.555482	7.26018	1.42925	3.45035	4.5707
chr1	89617960	89618374	0.937539	4.57081	3.06669	3.24658	3.40115
chr1	89637052	89637600	0.961901	10.1823	8.70251	7.55526	8.67913
chr1	89652107	89653106	0.11105	14.1561	16.6945	13.3839	11.3512
chr1	89662533	89663561	0.784551	18.3201	14.2816	13.6343	17.1838
chr1	89721720	89722319	0.437455	15.198	9.74024	8.98221	13.7252
chr1	89724134	89724517	0.861238	5.47834	1.36705	4.55262	1.42816
chr1	89744415	89744871	0.748689	4.47263	2.92609	2.6797	2.50634
chr1	89745116	89745794	0.614527	5.72988	6.94717	6.06734	3.23869
chr1	89749500	89749783	0.52859	4.13062	3.0874	4.13562	1.14608
chr1	89749919	89750964	0.312016	3.48494	2.54372	2.21885	2.12992
chr1	89751413	89751841	0.64261	2.5121	3.73889	2.51729	1.89452
chr1	89782772	89783245	0.270281	6.32307	4.83367	3.92232	3.6114
chr1	89787407	89787919	0.866262	8.46259	5.49506	5.6106	8.37345
chr1	89796668	89797028	0.385861	2.14425	3.17889	3.71665	2.91876
chr1	89797283	89797976	0.90403	10.6906	12.8335	12.0816	8.72086
chr1	89802974	89803546	0.442315	15.1529	8.76467	6.75249	13.7789
chr1	89819144	89820078	0.0352406	15.7852	12.9639	11.7659	14.0864
chr1	89832829	89833874	0.197139	11.7682	13.4859	12.0028	13.2361
chr1	89860048	89860674	0.941991	7.97261	5.04623	5.96705	5.1705
chr1	89898474	89898720	0.576222	2.42036	1.83623	2.20883	2.22029
chr1	89990470	89991291	0.515813	5.15561	1.39608	2.23501	2.264
chr1	90016761	90017431	0.753346	6.58058	3.65631	4.40604	4.69476
chr1	90018092	90018522	0.915743	8.10435	2.48103	4.53426	3.80469
chr1	90022243	90022914	0.336652	4.95519	2.01457	2.21193	2.31984
chr1	90040153	90041357	0.121268	12.2252	7.16086	10.2065	9.0798
chr1	90041846	90042341	0.908097	9.73621	2.90677	6.16265	4.43712
chr1	90046499	90047027	0.835374	7.39726	2.7384	5.39931	2.6104
chr1	90092201	90092750	0.273047	5.61084	2.71381	1.33595	4.87439
chr1	90113744	90114144	0.975512	9.01774	2.87176	3.02589	6.99056
chr1	90173906	90175054	0.995652	33.2414	29.695	28.0114	28.708
chr1	90181243	90181975	0.688047	21.1426	10.4853	9.60771	18.2038
chr1	90183955	90184924	0.720108	30.9288	27.5304	26.5518	29.6179
chr1	90186191	90187140	0.541397	21.7566	16.3273	16.7374	21.8322
chr1	90197969	90198623	0.997977	21.6203	14.8587	13.4044	21.2774
chr1	90215156	90215679	0.394738	10.7515	6.97454	4.92977	14.6452
chr1	90242113	90242594	0.842595	12.134	13.3798	9.4255	11.9186
chr1	90253285	90254575	0.430681	11.227	14.5123	11.0142	13.5307
chr1	90263864	90264315	0.453935	3.78904	4.82882	5.29648	4.71792
chr1	90264875	90265310	0.50625	7.97476	6.58212	6.60146	4.90348
chr1	90321018	90321741	0.261579	28.4254	25.7467	22.6775	24.2887
chr1	90330501	90331133	0.74208	13.9743	13.4602	11.636	11.4105
chr1	90333180	90333687	0.524102	5.15602	8.141	7.28737	2.72554
chr1	90341535	90342430	0.929142	12.972	9.79616	7.29489	13.8005
chr1	90344848	90345168	0.213815	1.858	0.740263	4.21481	2.28537
chr1	90351418	90351769	0.0913842	4.02563	2.84636	2.97212	1.23638
chr1	90352469	90352841	0.659951	2.45202	1.05361	0.8801	1.94757
chr1	90352960	90353857	0.256567	21.1993	14.6125	12.6475	16.7952
chr1	90362206	90362675	0.816614	6.94387	5.76688	5.17632	5.86094
chr1	90370293	90371008	0.318077	22.3371	20.5767	17.7134	20.8936
chr1	90407469	90407779	0.924771	2.98769	1.85141	2.2015	2.23752
chr1	90424208	90424648	0.0761308	5.72302	1.85095	1.72879	5.96508
chr1	90432755	90433069	0.991748	3.77037	3.92237	4.61325	2.3289
chr1	90455814	90456256	0.0694601	4.06335	3.92761	3.82049	5.39824
chr1	90457925	90459496	0.715232	15.29	11.9829	9.15858	13.5232
chr1	90500010	90500364	0.813607	2.59885	2.0403	2.22678	1.14472
chr1	90517207	90517540	0.279612	2.94097	3.29221	1.76667	1.9919
chr1	90535952	90536903	0.0466364	2.09669	2.22727	3.78927	2.10221
chr1	90597263	90597570	0.0871752	1.10173	0.901338	2.74753	1.78056
chr1	90597685	90599315	0.92736	6.24993	4.4097	5.81611	3.20155
chr1	90601584	90603225	0.929329	23.4426	20.9845	20.2423	20.3152
chr1	90638838	90639974	0.61528	11.274	14.2815	11.1497	13.6396
chr1	90641420	90642445	0.559103	20.375	20.7899	17.2668	18.0945
chr1	90646478	90647265	0.225999	19.4617	16.1935	13.4384	15.5664
chr1	90648607	90649317	0.454175	15.6109	17.1936	13.2886	15.8917
chr1	90652989	90653775	0.983366	13.2846	8.34619	8.27666	12.6321
chr1	90660443	90660727	0.679556	2.79521	2.43519	2.98898	2.87688
chr1	90673561	90674045	0.683239	11.6897	4.99021	8.20751	7.6112
chr1	90703462	90703957	0.373707	9.73337	3.35821	3.89471	8.16378
chr1	90796828	90797663	0.427544	3.83076	1.9036	1.13154	3.41123
chr1	90823343	90823734	0.619676	5.10276	2.79781	2.35706	3.58244
chr1	90825343	90825716	0.630541	2.26827	5.97184	4.10836	1.97599
chr1	90826151	90826397	0.663522	1.79244	3.08273	2.81745	1.69617
chr1	90851495	90851731	0.00868068	3.48428	1.31597	3.35919	3.58854
chr1	90954528	90955226	0.906274	13.0246	7.34413	7.87686	9.38906
chr1	90965962	90967884	0.78726	7.06356	5.57704	6.4616	5.1418
chr1	91010015	91010767	0.610414	2.57715	4.40438	4.64331	3.34778
chr1	91012351	91012597	0.561307	2.47935	1.86398	2.36618	1.41961
chr1	91015565	91015811	0.157253	2.42036	1.65815	1.9832	0.946406
chr1	91023658	91024297	0.369878	13.231	12.4838	10.4558	10.5328
chr1	91049396	91049794	0.853444	3.92013	7.96414	6.94836	3.81252
chr1	91071850	91072379	0.377051	13.5562	7.14455	8.62398	8.62734
chr1	91087833	91090065	0.905216	26.667	25.5204	23.4871	24.9272
chr1	91092668	91093920	0.784278	12.8349	11.8228	14.0456	10.9849
chr1	91103753	91104342	0.364495	18.536	11.5106	10.6069	15.4114
chr1	91131200	91132489	0.742671	10.5256	9.72136	8.53234	8.98195
chr1	91137284	91137803	0.0883568	6.10265	5.06407	5.73861	7.1231
chr1	91163153	91163401	0.0820809	2.04418	3.26214	1.0494	0.339615
chr1	91219330	91220180	0.835273	21.3545	13.8771	17.6511	16.7741
chr1	91239350	91239914	0.301785	15.0297	7.10334	9.86354	10.1551
chr1	91240873	91241683	0.730069	23.7644	10.9363	12.4735	19.639
chr1	91251290	91251757	0.759031	4.60551	2.24948	2.23649	4.5835
chr1	91261561	91261867	0.707405	3.07408	1.46804	2.08527	2.72934
chr1	91350878	91352597	0.779173	3.63833	2.14539	5.14623	1.25141
chr1	91352772	91353500	0.852971	9.11551	12.1515	8.97372	10.5269
chr1	91359716	91360256	0.798587	8.07846	10.1954	7.70764	5.81966
chr1	91384089	91384416	0.371885	3.26128	3.47782	3.34386	3.77702
chr1	91420861	91422948	0.927388	19.9913	20.8304	17.2226	19.032
chr1	91452610	91452983	0.426973	3.82779	7.0486	7.84483	4.25002
chr1	91471860	91472265	0.508545	2.8894	2.59299	2.4269	1.82025
chr1	91476543	91478619	0.848405	16.6552	5.94431	12.2444	5.35964
chr1	91479804	91480405	0.302374	14.7797	11.0847	8.07329	12.6432
chr1	91486910	91487228	0.490067	1.2921	0.839811	2.79224	1.13863
chr1	91502787	91504131	0.896772	19.3409	18.8532	17.8533	17.6571
chr1	91509028	91509498	0.667424	6.62777	3.44308	6.34755	3.85956
chr1	91522523	91522996	0.292668	4.17241	3.54903	3.22975	3.35339
chr1	91523675	91525037	0.873333	17.6238	16.2033	14.1699	16.7775
chr1	91528305	91529218	0.0712026	15.5997	20.5795	16.6174	18.7753
chr1	91530607	91531008	0.405416	3.72602	2.41702	4.08549	4.01658
chr1	91540074	91541079	0.0284653	10.1212	11.0258	16.2489	9.56403
chr1	91542606	91543805	0.175824	22.0481	20.2964	20.1034	20.4229
chr1	91569941	91570840	0.454635	12.9556	12.6284	12.4467	11.4037
chr1	91572667	91573498	0.10375	23.477	16.2592	18.1347	19.6922
chr1	91626897	91627664	0.809066	10.8637	8.92679	9.67782	10.1281
chr1	91649126	91649710	0.781237	11.1191	9.89137	10.9257	10.8314
chr1	91654063	91654571	0.650271	10.4589	8.13062	7.41568	7.56673
chr1	91666750	91667289	0.463013	9.65223	9.90113	8.43305	7.03917
chr1	91717532	91717952	0.528481	4.74791	2.61458	4.33714	4.87319
chr1	91727694	91728099	0.401012	4.36189	3.92678	5.59434	3.42792
chr1	91738310	91738652	0.119053	5.66182	5.42575	2.07664	2.88857
chr1	91740542	91741062	0.292195	6.70166	6.1968	6.23007	6.99206
chr1	91748573	91748877	0.266033	2.15117	1.57693	4.07046	1.61535
chr1	91755672	91756357	0.0324433	14.2745	10.6933	9.86866	13.1264
chr1	91756888	91757271	0.915887	3.8248	3.98366	4.75505	4.33134
chr1	91835536	91836290	0.637313	8.8402	4.35261	3.93008	7.0851
chr1	91836741	91837531	0.758529	20.4925	7.52912	6.08804	14.5481
chr1	91839675	91841082	0.48195	18.5443	17.2092	15.9436	17.3586
chr1	91909380	91910225	0.416113	6.21266	2.34092	2.05921	5.65142
chr1	91923401	91924051	0.178212	10.4582	5.60339	5.59312	8.02911
chr1	91947680	91948426	0.548125	23.6072	18.7661	16.0912	23.0546
chr1	91956533	91957752	0.205312	12.8192	11.879	11.5089	11.4369
chr1	92049683	92050051	0.951504	3.13964	2.00004	2.82128	2.03686
chr1	92056046	92056916	0.352792	4.45008	2.27701	3.43838	2.96244
chr1	92100114	92101305	0.466243	16.6646	16.4326	14.003	15.5912
chr1	92101386	92102351	0.271805	17.4826	21.8565	17.6533	16.6907
chr1	92142055	92142698	0.99703	8.03583	7.97135	7.43481	6.0196
chr1	92168962	92169484	0.424759	6.05507	4.22571	5.98238	6.06806
chr1	92187788	92188378	0.856993	6.87014	8.73743	8.76082	5.78669
chr1	92199837	92200237	0.692527	5.87079	2.01849	2.90093	2.36316
chr1	92269312	92269690	0.0372082	3.75993	3.16959	1.92389	1.11971
chr1	92453652	92454219	0.253572	19.6577	10.2286	8.14515	16.0496
chr1	92473972	92474363	0.88456	4.19995	3.41857	4.43103	3.42644
chr1	92484822	92485927	0.649167	18.1665	18.9742	16.2093	16.6914
chr1	92487419	92488025	0.923961	9.82956	10.1286	6.22768	12.3376
chr1	92488997	92490435	0.327758	21.3479	18.6581	17.3451	19.2425
chr1	92529956	92530408	0.573438	9.53678	9.93392	11.7864	10.5581
chr1	92546830	92547898	0.949978	24.9869	24.8937	21.7653	23.6657
chr1	92726630	92726956	0.589918	2.73227	3.51815	2.12816	3.12874
chr1	92736622	92737459	0.403466	19.8619	15.3357	15.4403	19.9266
chr1	92746351	92747032	0.962781	10.2433	9.13365	8.71046	9.92359
chr1	92768510	92769103	0.416773	9.68309	3.64657	5.24838	7.04396
chr1	92802559	92803602	0.0192103	27.1037	24.2692	24.5209	22.9855
chr1	92805401	92805826	0.582294	2.70079	3.43268	2.9011	1.93739
chr1	92806165	92807127	0.00499614	28.1102	24.0796	24.9703	22.4094
chr1	92811186	92812086	0.35836	5.34935	4.4588	5.09735	4.28669
chr1	92824717	92825659	0.286925	17.3538	14.6179	14.4292	16.1635
chr1	92852927	92854232	0.0467454	18.6082	19.3585	16.8047	16.6121
chr1	92867277	92867640	0.0149092	3.38678	3.07736	0.686971	1.9415
chr1	92869538	92870433	0.157713	27.1646	23.4474	23.5499	21.049
chr1	92895241	92895859	0.00116176	4.41139	2.31348	1.61825	2.88455
chr1	92906962	92907254	0.11609	3.14878	2.32192	1.31061	0.754894
chr1	92913943	92914378	0.905735	2.40493	3.04214	2.98818	2.27643
chr1	92917726	92918223	0.909092	7.33866	17.0402	5.90279	19.5078
chr1	92919641	92920003	0.566366	2.07029	3.44147	2.4383	2.74915
chr1	92934203	92935006	0.0245808	16.6789	13.1224	12.8587	13.9887
chr1	92936512	92936879	0.483198	2.68712	3.06254	3.10128	1.80786
chr1	92949160	92949676	0.203908	3.49448	2.90802	2.25004	4.33699
chr1	92950041	92950556	0.376924	6.20643	5.04466	9.18199	3.74948
chr1	92971703	92971978	0.617633	3.10262	2.28074	2.13793	0.846965
chr1	92977087	92977353	0.585972	2.04543	2.35762	3.16943	1.89236
chr1	92995231	92996340	0.891145	23.0131	22.7731	20.2994	20.8039
chr1	93004007	93004539	0.858618	6.6901	6.36165	5.7243	6.45342
chr1	93025367	93025848	0.429995	9.22139	8.31231	8.29359	8.72169
chr1	93075232	93076951	0.47334	14.5052	12.7425	10.9375	12.0909
chr1	93077266	93077726	0.0328997	5.98959	6.37139	4.16602	5.07832
chr1	93104328	93104706	0.478795	3.89262	4.92092	3.15832	3.04105
chr1	93107556	93109081	0.91924	14.6233	10.4373	10.3943	13.4949
chr1	93116068	93116600	0.915949	5.19283	11.0911	9.54723	5.41107
chr1	93135653	93136204	0.498054	12.7349	8.77215	7.48364	11.4561
chr1	93137264	93137746	0.729382	1.75054	6.00666	4.01118	1.35138
chr1	93146291	93147181	0.658464	14.9163	11.9366	10.1914	8.42526
chr1	93147778	93148013	0.813813	0.993744	2.31149	2.28796	1.90478
chr1	93148350	93149161	0.40733	19.5967	21.1063	15.6192	22.5155
chr1	93151956	93152302	0.577283	3.72065	3.94092	1.37927	3.83455
chr1	93194619	93195199	0.153647	4.38281	2.4412	0.985736	2.44504
chr1	93241787	93242419	0.0191974	4.05841	2.42745	3.41206	1.81803
chr1	93242887	93244208	0.396846	22.1824	22.6686	20.114	21.7888
chr1	93262451	93263450	0.112148	21.903	15.3075	18.0946	16.427
chr1	93276831	93278041	0.983674	21.2633	18.4436	18.082	19.541
chr1	93286544	93287066	0.5658	8.58206	4.33602	5.56688	2.53045
chr1	93294927	93295386	0.322293	3.73745	2.8921	3.47259	0.75848
chr1	93309156	93309956	0.238983	7.31802	6.96659	8.51437	4.56142
chr1	93310782	93311062	0.00100066	2.59917	2.60199	-0.100038	0.544035
chr1	93320626	93320898	0.03212	2.40332	3.05068	1.75313	1.23833
chr1	93324736	93325670	0.430135	20.0598	20.2114	17.8219	18.9325
chr1	93328582	93329172	0.924109	7.12144	4.44894	4.28611	6.92452
chr1	93333199	93333665	0.713165	4.77136	5.34157	4.00519	4.36624
chr1	93342615	93343002	0.331568	3.30689	3.12403	1.75011	2.42837
chr1	93344017	93344553	0.887183	9.8987	9.05547	6.43773	7.7448
chr1	93354938	93356708	0.747947	14.4132	13.3822	11.9394	10.7732
chr1	93357020	93357557	0.904378	8.85994	9.19153	8.15453	6.48373
chr1	93375470	93375977	0.0653354	12.5149	12.1294	8.99746	14.0129
chr1	93379622	93380813	0.609626	18.4416	16.2515	13.3488	15.1402
chr1	93386670	93387332	0.277389	11.8923	14.1633	10.774	9.94762
chr1	93390967	93391482	0.742939	3.69162	1.74465	1.83327	1.17795
chr1	93411479	93411919	0.930111	8.00478	3.50633	4.38045	7.32274
chr1	93420013	93420877	0.825513	18.071	18.5577	15.0547	21.8053
chr1	93430849	93431411	0.481313	11.2406	6.54518	8.06943	8.51762
chr1	93436849	93437210	0.0195245	1.15679	1.54481	3.01426	2.79149
chr1	93459501	93460103	0.363872	7.3819	11.7957	10.3596	9.02606
chr1	93460446	93461253	0.690656	13.5873	11.3205	10.2252	13.1428
chr1	93470461	93471396	0.883997	22.8172	22.8244	20.3195	20.9696
chr1	93497012	93497800	0.481694	21.9758	16.7724	18.8197	18.6642
chr1	93552316	93552679	0.432868	2.29056	2.00868	2.17172	2.8947
chr1	93579097	93579510	0.66688	8.82766	6.04885	7.82668	7.30952
chr1	93585987	93586540	0.566629	4.94339	2.30962	2.04991	3.515
chr1	93626981	93627245	0.600057	2.95119	1.59725	2.03758	1.53349
chr1	93651380	93652330	0.0354706	15.1475	13.5104	16.3166	13.301
chr1	93697981	93698747	0.610933	13.631	5.1231	7.14251	7.10317
chr1	93714290	93714678	0.826434	4.74341	4.17621	4.72283	4.11847
chr1	93715627	93716387	0.508668	12.6237	9.80005	9.08621	10.7955
chr1	93718803	93719811	0.967659	15.5721	16.2715	14.0981	14.7159
[truncated: 63,628 more rows]

## Sheet: RAD21
Peaks (mm9)			chipcomp	Delta RPKM
chr	start	end	pval	rad21_shCtrl_rep1	rad21_shCtrl_rep2	rad21_shU_rep1	rad21_shU_rep2
chr1	3311993	3312520	0.00042118	5.57112	3.15119	0.554588	0.330197
chr1	3315315	3315703	0.000234159	4.38367	3.32467	0.158875	0.276573
chr1	3467428	3468040	0.70422	1.90016	1.77727	0.661171	0.611611
chr1	3472174	3472490	0.370978	2.32092	2.38507	1.63016	1.22971
chr1	3483714	3483969	3.91127e-05	1.36446	1.02767	2.44609	4.84528
chr1	3504658	3505550	0.00853386	10.2901	8.74966	8.58275	10.8879
chr1	3541192	3541856	0.263131	3.60654	2.6695	2.66191	2.12742
chr1	3600941	3601780	0.0447911	16.892	10.4538	9.12669	10.0627
chr1	4132597	4132953	0.0715077	3.57475	3.09376	0.334895	0.821452
chr1	4322526	4322973	0.472886	11.9071	8.97609	6.34199	9.74046
chr1	4506602	4507077	0.0102304	8.60365	3.87717	1.21334	2.6835
chr1	4758306	4758895	0.954279	11.2556	7.35001	6.16035	5.44482
chr1	4770153	4770558	0.39565	4.56593	3.07647	1.68462	2.68005
chr1	4775473	4776218	0.163471	3.47855	3.90994	1.84315	1.74702
chr1	4797477	4798389	0.133326	6.26446	3.98221	2.06869	3.25382
chr1	4847363	4848587	0.502373	3.39928	2.6494	2.2846	2.0188
chr1	5060116	5060718	0.446129	9.34587	7.93572	3.7691	6.04804
chr1	5072952	5073813	0.194154	3.74112	1.94671	1.20133	1.22323
chr1	5093227	5093675	0.0845084	8.36145	6.46283	2.80959	4.30049
chr1	5894941	5895302	0.00032672	6.07822	4.9148	1.26238	1.40534
chr1	6125145	6125563	0.0328683	5.16602	2.68877	0.957638	1.65729
chr1	6204573	6205333	0.125867	5.09059	2.84353	3.0784	4.53817
chr1	6262349	6262831	0.108583	5.04524	1.77965	0.25172	1.97574
chr1	6320632	6321088	0.295518	7.77272	3.86029	3.74266	3.67285
chr1	6396334	6396859	0.388561	7.99496	5.3485	2.82019	4.75145
chr1	6407919	6408342	0.0008474	5.75703	5.85634	0.274816	1.65532
chr1	6849016	6849495	0.0456352	7.63807	3.55187	2.48884	2.16629
chr1	7000245	7000702	0.00813414	7.42547	4.00539	1.12388	2.25408
chr1	7078295	7079494	0.558488	5.48017	3.93768	2.56525	3.45365
chr1	7194672	7195211	0.00352494	5.65614	3.48641	0.85001	1.18273
chr1	7209042	7209409	0.00886269	2.52992	2.37656	0.319385	0.312603
chr1	7386950	7387717	0.0221613	3.63855	2.48946	0.968403	0.947635
chr1	7388212	7388717	0.0923578	6.56616	6.84177	3.60651	3.97037
chr1	7533590	7533984	1.0984e-05	4.11864	2.51413	-0.271939	-0.357638
chr1	9531233	9531711	0.00490079	7.19755	4.16958	2.02442	0.829374
chr1	9535185	9535693	0.255144	10.8422	7.39125	5.14398	5.09985
chr1	9539062	9539502	0.943507	6.50179	4.15086	4.00023	2.43356
chr1	9563220	9563825	0.202873	13.4978	9.60296	5.72013	5.35615
chr1	9574693	9575216	0.022919	4.80532	2.89933	1.52763	0.00682214
chr1	9611355	9612121	0.752612	15.4409	11.6033	9.4048	8.42988
chr1	9621349	9622053	0.729074	4.66007	2.46537	2.18319	1.98051
chr1	9686623	9687322	0.00209529	7.71878	5.71872	2.36091	3.09821
chr1	9690774	9691100	0.985019	2.37611	1.64291	2.26823	1.23768
chr1	9693066	9693464	0.799395	3.30186	2.4612	2.28303	1.51703
chr1	9762759	9763369	0.828202	17.6705	12.7401	9.67003	11.6885
chr1	9787740	9788879	0.0842912	3.70459	3.65081	1.46211	1.85326
chr1	9838358	9838934	0.748848	3.5679	2.67136	1.58224	2.94774
chr1	9840157	9840597	0.0106847	4.47485	3.12612	4.38395	4.53057
chr1	9865934	9866399	0.143724	2.91566	2.77531	0.865395	1.14734
chr1	9933725	9934499	0.643727	5.25238	4.6383	2.72601	4.67192
chr1	9937610	9938115	0.0750995	3.37549	2.0282	3.26408	4.20538
chr1	9957914	9958645	0.76213	2.76356	2.00426	1.02709	2.42982
chr1	9982376	9982807	0.055277	7.42989	6.16851	5.40176	8.03779
chr1	9997283	9997794	0.830156	6.34955	2.80064	2.66577	2.97388
chr1	10029507	10029790	0.452756	2.1887	3.21023	0.62434	1.34637
chr1	10029950	10030559	0.439057	5.44217	4.29598	3.0946	3.53676
chr1	10079541	10080043	0.432532	9.82049	7.74485	6.44826	6.39368
chr1	10219007	10219654	0.36372	14.3462	8.83181	5.61521	7.29571
chr1	10221574	10224063	0.926424	7.22449	6.50305	5.04966	6.20293
chr1	10275525	10275911	0.00114966	2.42349	2.15375	4.11069	4.2032
chr1	10290489	10291178	0.000492996	2.31193	1.44957	4.0384	2.52417
chr1	10370923	10371183	0.593902	2.81362	2.66978	1.31607	1.94917
chr1	10387957	10388315	0.427928	3.77318	3.10734	2.06886	1.37558
chr1	10419835	10420437	0.051227	13.8249	11.2858	6.31656	6.63916
chr1	10478289	10478755	0.0532197	3.23923	2.45979	1.58391	1.00194
chr1	10582585	10583186	0.0398041	5.20154	3.28745	3.59189	5.37936
chr1	10594166	10594713	0.024811	2.98379	2.1092	0.430802	0.494353
chr1	10749609	10750165	0.0654657	11.2312	7.26635	4.58792	7.16766
chr1	10761815	10762221	0.424637	4.92976	3.27855	2.52196	2.63685
chr1	10825676	10826339	0.407543	21.5993	19.3046	15.6523	18.2951
chr1	10827211	10827878	0.0559918	12.6444	8.02926	3.66476	5.76515
chr1	10894389	10894733	0.27201	2.59495	2.59913	0.666692	1.33465
chr1	10945435	10945732	0.829308	3.37339	3.18401	0.969045	1.33312
chr1	10983477	10984754	0.0118873	6.65755	5.47524	3.03108	3.19925
chr1	11050052	11050306	0.691012	6.51466	2.44138	3.79479	2.18437
chr1	11055245	11055678	0.0348969	6.77777	5.05516	1.70901	2.15624
chr1	11087276	11087727	0.211642	4.11038	2.19709	1.14328	1.18288
chr1	11129769	11130489	0.876619	11.5604	8.35399	5.75218	6.97948
chr1	11141602	11142062	0.322813	5.70663	2.41126	3.32995	3.40761
chr1	11223943	11224394	0.69644	4.11343	2.22156	1.25986	2.5306
chr1	11338387	11338711	0.0235488	2.15801	1.83534	3.14893	3.37093
chr1	11404049	11404565	0.0548313	5.52739	3.57732	1.77174	0.725179
chr1	11456245	11456786	0.775624	9.31937	5.7037	5.14487	4.78934
chr1	11555339	11555795	0.490557	8.52803	4.89061	2.86907	4.86757
chr1	11647565	11648403	0.00966275	17.9611	14.6067	9.00833	9.62748
chr1	12018169	12018524	0.013335	4.67027	2.3213	-0.617671	0.260351
chr1	12555042	12555434	0.930793	3.96114	2.54504	2.6118	1.99368
chr1	12689141	12689521	0.567756	2.65656	1.75014	1.05315	0.93554
chr1	12826639	12827347	0.0164252	11.5389	4.75694	4.01592	2.95926
chr1	12854139	12854582	0.0510755	6.25653	5.63522	2.81616	2.14124
chr1	13040187	13040713	0.424835	5.50601	3.22762	3.12634	4.09435
chr1	13042037	13042647	0.426512	10.1058	6.80646	5.21063	5.45816
chr1	13124223	13124864	0.650857	22.5729	19.0137	14.945	16.6371
chr1	13141050	13141613	0.697566	15.5222	10.7915	6.74796	8.59315
chr1	13361806	13365008	0.58411	5.6429	4.69359	3.18437	4.01738
chr1	13416540	13416943	0.837435	4.03029	2.72408	2.25728	1.71882
chr1	13490435	13490998	0.0286839	8.47794	7.44648	3.02006	4.35259
chr1	13521437	13522132	0.434587	12.193	7.92986	6.04032	5.98154
chr1	13579044	13580255	0.939514	5.14225	4.19529	3.75462	3.27855
chr1	13629674	13629894	2.96144e-05	1.76723	1.07248	3.60376	3.86492
chr1	13649563	13650977	0.790442	6.04699	3.87595	3.3069	3.61635
chr1	13687886	13688291	0.0257843	3.45156	3.3859	0.858508	1.16128
chr1	13689746	13690121	0.145608	5.26307	3.65605	3.47907	5.71881
chr1	13696303	13696932	0.116336	17.0852	13.1911	7.40652	11.3416
chr1	13705938	13706359	0.34102	3.60421	3.79296	1.7624	2.18224
chr1	13774449	13774921	0.400474	11.3476	5.86098	6.24244	6.50117
chr1	13779080	13779874	0.99747	14.7604	11.9916	7.35929	9.35696
chr1	14299792	14300286	0.136456	2.59483	1.97591	2.64678	2.26561
chr1	14560730	14561179	0.387316	6.25562	3.71492	4.92225	3.72204
chr1	14625978	14626285	0.926457	4.41136	2.63434	1.85217	2.59226
chr1	14719022	14719513	0.173707	8.61734	5.35681	3.81418	2.3927
chr1	14730171	14730670	0.777494	14.1838	12.5441	9.42546	10.9633
chr1	14828151	14828756	1.41078e-05	4.41153	2.52527	0.285916	0.600481
chr1	14852334	14852915	0.292729	4.66197	2.81402	2.83959	2.97977
chr1	14908737	14909227	0.680101	5.8957	4.23497	4.16865	3.47922
chr1	14970373	14970706	0.0226567	8.53527	8.69035	3.23397	4.29196
chr1	14997651	14998278	0.797844	13.406	6.68639	5.9683	5.96104
chr1	15108443	15108941	0.471941	4.51143	2.41289	2.39611	1.48835
chr1	15276580	15277164	0.0591259	4.48291	2.69287	0.883351	0.83142
chr1	15317418	15317843	0.128234	5.79778	3.72392	2.93516	0.418358
chr1	15611811	15612426	2.02293e-10	12.1602	8.24921	1.75841	2.29085
chr1	15673656	15674109	0.000248986	10.529	9.33248	0.888269	2.98553
chr1	15795546	15796490	0.0937005	3.6119	2.14859	1.99864	2.78601
chr1	15865121	15865500	0.825208	6.51048	3.24748	3.73578	3.15675
chr1	15892424	15892951	0.0292252	9.21486	5.95969	2.91698	3.2704
chr1	15926656	15927114	0.437218	3.29269	3.4235	1.86979	1.46417
chr1	15983576	15983994	0.0334505	5.43515	4.47623	4.61654	5.78772
chr1	16093716	16095277	0.153316	3.93895	2.59317	2.55587	3.92283
chr1	16095434	16096680	0.798392	10.7711	8.74487	6.65573	8.11846
chr1	16162208	16162845	0.00812358	2.85171	0.801197	2.8524	2.60191
chr1	16215249	16215569	2.02549e-06	0.265627	0.356903	2.83148	3.43614
chr1	16217895	16218954	0	2.97874	2.06531	7.0193	8.19493
chr1	16225261	16225549	0.000134046	2.81702	1.15364	3.93738	4.60036
chr1	16231079	16231694	4.81526e-12	0.640724	0.673344	4.70283	5.13663
chr1	16294812	16295421	0.0148339	13.5288	9.56459	12.2855	15.4642
chr1	16423456	16423965	0.788798	18.8914	16.6666	12.4811	14.9061
chr1	16430245	16430774	0.946123	15.6461	9.66525	6.43141	8.78002
chr1	16509752	16510218	0.00447202	5.78643	4.14303	1.11089	1.83667
chr1	16608637	16609684	0.426852	3.40782	2.5209	2.34366	1.68295
chr1	16646411	16647223	0.282573	3.16144	3.48668	2.6659	3.81864
chr1	16655297	16655775	0.663376	5.34577	3.14039	3.21326	2.91495
chr1	16678402	16678790	0.777412	2.40042	1.93348	1.32323	2.28156
chr1	16678936	16679215	0.177652	2.90757	1.87917	3.64778	3.44861
chr1	16736012	16736551	0.155626	11.5669	7.08397	4.95189	4.64206
chr1	16788421	16788860	0.102512	5.45704	3.4277	2.46868	1.94937
chr1	17113429	17113926	0.0596047	11.6809	8.17318	5.13147	5.30227
chr1	17153549	17154221	0.0880982	13.7663	8.87235	5.07538	5.40214
chr1	17619708	17620141	0.601183	8.19098	5.55939	5.24146	3.36277
chr1	17970728	17971140	0.00156737	5.33097	3.05111	1.24389	0.997996
chr1	18096776	18097203	0.194695	6.15948	3.03836	3.45412	2.88071
chr1	18350015	18350538	0.0312269	9.35606	4.51256	1.85443	2.8489
chr1	18966663	18967213	0.000478823	6.79862	3.74658	1.14566	0.518706
chr1	19169083	19169419	0.568714	7.10451	2.88118	1.5214	3.82396
chr1	19195605	19196757	0.00352951	11.518	6.50941	3.80525	3.77795
chr1	19767511	19768065	0.000170227	6.33334	3.80641	0.421722	1.2979
chr1	19963255	19963863	0.793666	9.63993	8.14943	4.75855	6.76901
chr1	20301594	20301987	0.0722685	3.64044	3.37672	1.02354	1.35701
chr1	20503776	20504149	0.241502	4.87571	2.09976	1.21647	2.30374
chr1	20544523	20544777	0.303576	5.61405	2.29578	3.5683	2.59226
chr1	20602717	20603246	0.229161	11.6554	7.25194	9.4349	7.82689
chr1	20607671	20608518	0.585651	3.11366	2.53876	1.41832	3.20556
chr1	20609407	20610029	0.612283	2.44137	2.18246	1.28325	3.35006
chr1	20689971	20690605	0.127498	13.3665	8.70904	4.47276	5.81929
chr1	20728442	20728975	0.717838	8.604	5.15003	4.58438	4.77068
chr1	20747976	20748311	0.234919	3.56487	2.39362	1.6918	0.98367
chr1	20791761	20792259	0.156143	18.3764	18.6315	17.6358	18.4055
chr1	20809632	20810465	0.0328078	2.79492	2.45254	0.49446	1.31325
chr1	20880391	20881510	0.263855	8.2696	6.30123	4.92612	5.00022
chr1	20923597	20923923	0.0799954	4.00783	3.42348	3.30011	4.11133
chr1	20928985	20929707	0.811863	12.2874	8.30467	7.69835	8.6964
chr1	20941791	20942158	0.437726	2.01049	1.35897	1.39599	0.595244
chr1	20998947	20999227	0.000349628	3.17618	1.22585	5.67934	4.10981
chr1	21004587	21005014	0.00682715	4.70074	2.99587	6.9035	4.32976
chr1	21068705	21069273	0.766137	4.14251	2.82692	1.5101	3.20445
chr1	21069452	21069924	0.0478774	5.31472	5.38327	4.8157	5.99836
chr1	21070480	21070870	0.983785	2.8735	1.99026	1.31129	2.06104
chr1	21091091	21091755	0.0510645	6.27628	4.82101	1.81015	2.55183
chr1	21151646	21152375	0.569195	18.7008	14.5529	12.4508	12.8609
chr1	21156193	21156822	0.108495	20.6258	17.4397	16.674	18.0033
chr1	21208339	21209101	0.248835	18.649	14.0498	13.2443	13.3027
chr1	21230287	21230778	0.319873	4.71536	2.50822	3.92334	2.73253
chr1	21242497	21242758	0.415679	3.98913	2.00828	3.04367	2.12601
chr1	21256967	21257180	0.00748484	1.48446	1.71303	2.9309	3.73092
chr1	21261468	21261793	0.0805371	7.80825	7.19754	5.92112	10.0479
chr1	21334386	21334756	0.00462186	5.11901	4.81477	0.622697	1.61144
chr1	21401195	21401991	0.58906	16.2142	10.6967	8.48123	8.96066
chr1	21438194	21438709	0.0561162	6.50553	4.30998	2.31716	2.28142
chr1	21451069	21451673	4.08557e-05	9.25133	5.20118	1.97462	1.95812
chr1	21489710	21490393	0.129598	3.68328	2.66004	1.16881	2.13369
chr1	21520896	21521252	0.887922	2.9353	1.67083	1.91301	1.58113
chr1	21603989	21604543	0.99133	5.58752	3.42494	2.2584	4.28248
chr1	21937758	21938110	0.0628778	2.31408	1.82628	0.332957	0.599431
chr1	21951271	21951678	0.056783	3.59304	2.88905	0.293033	1.42878
chr1	21957125	21957719	0.067556	8.75503	4.76544	2.49654	2.79595
chr1	22258889	22259556	0.457534	20.3727	14.5553	12.7569	12.1032
chr1	22348275	22348713	0.000158615	8.09142	4.23813	1.55798	1.04887
chr1	22376409	22376828	0.051359	6.43068	4.46558	1.09287	2.44028
chr1	22494141	22494543	0.0297953	5.57587	3.98157	1.55887	0.285454
chr1	22611263	22611662	0.684603	6.57001	5.01278	3.55405	4.53077
chr1	22633787	22634232	0.0018508	6.75265	4.79513	1.0337	2.0481
chr1	22678700	22679173	0.0452736	4.31998	1.94676	0.491654	1.12798
chr1	23068790	23069224	0.000621084	7.01193	4.47324	0.798948	0.546038
chr1	23127711	23128114	0.828551	4.43197	3.36552	3.37089	2.27062
chr1	23147268	23147659	0.589099	5.4201	3.58338	1.75511	1.59125
chr1	23170190	23170907	0.0129766	5.28245	3.6388	1.59187	2.27049
chr1	23175329	23175821	0.00279911	12.533	6.35235	3.2289	2.99056
chr1	23194299	23194782	0.331994	4.16254	2.8941	3.17798	2.50122
chr1	23262561	23264636	0.324582	5.93204	4.58954	2.50339	4.4631
chr1	23293496	23294128	0.537888	11.5642	9.03607	8.88733	9.66873
chr1	23389275	23390596	0.0104334	3.45776	3.73983	1.17344	2.19373
chr1	23502153	23502634	0.260457	5.3125	4.12068	1.77427	2.84301
chr1	23712309	23712805	1.48859e-05	3.57219	3.16967	0.460758	0.164304
chr1	23799535	23800048	0.025281	12.1039	7.47001	4.20684	5.07923
chr1	23833930	23834356	0.60339	7.08534	4.70326	4.12902	2.64386
chr1	23927155	23927549	0.55426	3.92019	3.21816	2.01884	1.53239
chr1	23928491	23929504	0.284134	3.93302	3.07367	1.69775	2.05063
chr1	24012028	24012789	0.341874	5.42499	4.25603	3.21267	4.92724
chr1	24040694	24041325	0.146508	7.52878	3.25393	2.2606	1.71554
chr1	24106259	24107202	0.0266437	5.56926	3.80038	2.11991	2.54113
chr1	24107436	24107685	0.905213	2.7889	2.8315	1.15105	1.42576
chr1	24141569	24142119	0.982101	9.39427	3.82689	2.79154	3.42381
chr1	24143925	24144445	2.55936e-05	11.7063	9.39095	2.41355	1.91001
chr1	24178078	24178709	0.177806	8.56017	4.59147	5.39503	6.58727
chr1	24237144	24237544	0.00111834	4.81147	3.44778	0.434606	0.648079
chr1	24255660	24256450	0.0135968	11.8048	7.26313	4.59751	5.5073
chr1	24309522	24309874	0.419505	3.18673	2.78193	2.58627	1.80927
chr1	24374287	24374828	0.0273123	9.76086	4.84809	2.52382	2.32264
chr1	24385415	24385688	0.0983558	3.52332	3.59841	1.24255	1.40965
chr1	24685139	24685779	0.772088	4.1728	2.93092	2.83748	2.67667
chr1	25567154	25567564	0.0134911	4.89517	3.58881	0.97874	0.849124
chr1	30201807	30202243	5.20051e-05	6.71235	5.08913	0.911247	1.97162
chr1	30641490	30642175	6.26728e-06	16.2478	14.7515	7.95256	8.28831
chr1	30753162	30753549	0.000468179	5.38029	2.9036	0.44656	1.31117
chr1	30757192	30757750	0.520298	7.39015	4.55507	3.96789	3.64724
chr1	30797670	30798293	0.0321166	10.7658	6.48615	4.00762	4.43985
chr1	30835465	30836212	0.856351	9.13734	5.36127	4.56513	4.74135
chr1	30837113	30837470	0.440192	3.4572	3.21973	1.60197	1.08888
chr1	30929671	30931156	0.822395	5.36198	4.86356	3.34186	4.11082
chr1	30977617	30978101	9.70882e-05	6.45634	4.47797	0.952662	-0.22245
chr1	30987580	30988196	0.124312	8.95327	5.46624	3.23031	3.74974
chr1	31005178	31007591	0.00280882	6.0887	4.59197	2.26872	2.95053
chr1	31048610	31049172	0.00289325	4.96342	3.22473	0.91787	0.692397
chr1	31076039	31076699	0.665846	6.68251	2.74067	3.26669	3.47219
chr1	31090422	31091165	0.0445338	3.48975	2.44552	0.851186	1.01305
chr1	31150814	31151133	0.00636565	2.0714	2.01462	0.538292	0.104308
chr1	31151425	31152103	0.000764474	3.76914	2.55397	0.183529	0.305925
chr1	31153416	31153693	0.221615	3.07689	1.45222	1.0242	1.1889
chr1	31209783	31210301	0.452207	17.3026	13.3133	9.51578	11.3205
chr1	31210667	31211419	0.595025	15.0359	10.602	8.52736	10.6186
chr1	31266920	31267470	0.757813	9.94335	5.40837	5.76885	4.10478
chr1	31393888	31394321	0.0894726	5.06985	2.43382	1.18603	0.932538
chr1	32610809	32611156	0.00671329	3.66324	2.58805	-0.148518	0.309158
chr1	33353032	33353363	0.0251375	3.95991	2.60094	-0.155676	1.05117
chr1	33556365	33556944	0.211841	7.04907	2.83732	3.82771	3.65598
chr1	33684633	33685057	0.11411	3.82143	2.73818	1.34704	0.707551
chr1	33704110	33704443	0.337755	5.21258	2.50732	1.02843	2.96868
chr1	33720009	33720572	0.0695412	5.75681	3.67984	4.33335	4.14174
chr1	33727194	33727492	0.00410683	1.72477	0.729329	2.85342	2.53374
chr1	33729181	33729800	0.203193	9.34691	5.30217	5.85901	5.7505
chr1	33741222	33741859	0.548149	9.01638	5.78039	5.6127	4.92447
chr1	33776554	33777345	0.764073	3.13066	2.77012	2.37708	2.03953
chr1	33796058	33796639	0.812839	14.6522	9.93516	7.8102	8.21882
chr1	33799638	33800080	0.00471189	3.67858	1.96531	0.276733	0.502539
chr1	33814367	33814900	0.0693382	2.48515	2.34499	1.92596	2.79555
chr1	33870652	33871685	0.0628396	3.86359	2.3686	1.38955	1.73801
chr1	33949527	33950336	1.80535e-05	8.96765	6.31444	0.989493	1.66417
chr1	34021355	34021996	0.0179986	7.63213	2.82297	1.59724	1.98407
chr1	34023181	34023586	0.664765	7.22148	5.56916	3.78603	3.83252
chr1	34062475	34063016	0.361218	13.1126	8.95132	8.27631	7.35228
chr1	34067810	34068517	0.0193037	7.21397	4.84178	4.90176	6.72457
chr1	34117771	34118323	0.721397	8.09451	4.32305	4.21982	5.406
chr1	34166378	34166814	0.244121	3.97139	2.47677	2.86359	2.7109
chr1	34174511	34174852	0.549383	6.53821	3.16476	2.99832	3.44214
chr1	34178028	34178424	0.957224	2.24119	2.14723	1.14854	2.15151
chr1	34184663	34184921	1.42665e-05	2.23005	0.930346	3.95136	4.04352
chr1	34221399	34222098	0.87639	9.70889	5.10928	4.6292	5.247
chr1	34275144	34275612	0.349959	11.7141	8.15475	6.79474	6.44541
chr1	34466684	34467123	0.000288302	4.4819	3.21761	0.534244	0.852085
chr1	34495983	34496352	0.040115	3.14438	2.39361	-0.58883	0.340713
chr1	34496610	34497168	0.0019294	6.51436	3.67886	1.43379	1.80683
chr1	34516230	34516796	0.249152	2.406	1.42405	1.41891	1.74191
chr1	34659126	34659612	0.163253	13.6192	9.55989	5.36805	6.97765
chr1	34699213	34699826	0.0455815	11.7452	7.99298	4.16366	5.07473
chr1	34795252	34795658	0.396864	4.93314	3.89777	2.23318	2.8287
chr1	34899286	34899484	0.139256	1.74837	2.71946	3.70685	2.66878
chr1	34906608	34907017	0.848007	2.65649	2.68422	0.855068	2.05566
chr1	34923969	34924505	0.734111	14.4434	9.31123	6.14001	6.48003
chr1	34948331	34948877	4.90885e-05	12.4019	9.52806	2.71192	4.30424
chr1	34953660	34954181	0.272151	8.65426	3.79128	3.59885	3.42903
chr1	36121472	36122248	0.0595333	18.8616	17.2984	13.6655	16.0885
chr1	36124865	36126741	0.942263	5.85027	5.07273	4.00449	4.47534
chr1	36191205	36191819	0.0596341	13.1035	10.2524	10.711	11.0086
chr1	36300771	36301335	0.270229	2.07133	2.43305	1.02042	2.01762
chr1	36309593	36310119	0.947873	14.193	8.37706	7.44475	9.50636
chr1	36311411	36311943	0.304161	3.56572	1.74463	2.36301	1.5673
chr1	36330098	36330546	0.168387	2.32773	1.70853	1.77153	2.5641
chr1	36334059	36334526	0.420234	8.48919	3.20741	3.64388	3.04715
chr1	36335995	36336526	0.413878	10.3708	6.77915	5.34063	5.75217
chr1	36364634	36365271	0.844369	5.39086	3.85731	2.86192	3.89398
chr1	36380880	36381266	0.0205039	5.18808	3.72562	1.32746	1.43931
chr1	36425183	36426229	0.139919	5.17111	3.76985	2.94882	2.32644
chr1	36501346	36502459	0.84174	4.03178	3.94239	2.35307	2.52682
chr1	36528024	36528364	0.695208	3.96428	4.33708	0.514044	3.71355
chr1	36528509	36529123	0.844371	5.71993	11.3071	3.33143	8.87688
chr1	36549223	36549679	0.158531	5.48273	4.68834	1.99992	2.64899
chr1	36553601	36553947	0.52303	3.89177	2.28587	1.97688	0.588323
chr1	36558051	36558539	0.83771	10.4926	8.92948	6.96651	7.27579
chr1	36570590	36570931	0.574332	3.76372	3.48822	2.66649	1.46574
chr1	36603960	36604644	0.169959	17.3997	13.3279	10.9419	13.0554
chr1	36613484	36615246	0.260968	5.96023	4.72184	2.39953	4.00419
chr1	36691686	36692283	0.459149	14.3177	13.0791	9.40919	10.8681
chr1	36740852	36741402	0.330003	11.064	4.55382	4.75005	2.88454
chr1	36766004	36766448	0.497029	4.25848	2.53168	2.4273	2.02793
chr1	36794081	36794651	0.0248452	8.31862	6.01728	2.98835	3.6682
chr1	36801379	36801838	0.0372718	4.44547	2.37698	1.00224	0.411405
chr1	36841445	36842040	0.000624748	15.2056	11.2633	5.53728	7.4212
chr1	36960935	36961477	0.0468387	4.84232	3.00302	1.37154	0.882007
chr1	36976924	36977379	0.000411225	2.05376	1.8036	3.86421	3.02146
chr1	36994525	36994744	0.0835929	5.62581	1.73451	3.35761	4.79419
chr1	36995306	36997265	0.981713	4.36626	3.4923	2.76425	3.19817
chr1	37307289	37308053	3.03818e-06	15.8354	13.034	3.41995	4.23317
chr1	37329207	37329852	0.932568	15.1719	12.2675	9.5006	10.0605
chr1	37356733	37357330	0.421335	4.8707	3.07299	1.53344	1.82554
chr1	37407999	37408520	0.381415	2.60551	2.03716	1.20931	1.28746
chr1	37458380	37458936	0.0398734	8.9326	5.65648	2.75602	3.94713
chr1	37476217	37476724	0.00011881	7.44989	3.87398	0.476673	0.730396
chr1	37486457	37487569	0.0485129	3.34471	2.6136	0.986845	1.7314
chr1	37691356	37691960	0.000236196	7.91932	4.6005	0.859167	1.88422
chr1	37696009	37696377	0.408594	2.9442	2.0083	1.08192	1.26803
chr1	37735180	37735688	0.012623	7.73515	6.77971	2.47045	3.56755
chr1	37747491	37748008	0.345011	11.0361	5.11543	3.29997	5.02563
chr1	37776611	37777004	0.995276	2.4607	1.60816	0.588914	1.37592
chr1	37859157	37859482	0.490229	5.80873	2.9784	1.7499	2.74533
chr1	37921161	37922637	0.903789	3.47199	2.53114	1.86393	2.30532
chr1	37923896	37924351	0.734582	14.141	9.19283	9.08835	9.17875
chr1	37938623	37938980	0.679246	2.59675	2.14282	0.96231	1.26537
chr1	37948322	37948691	0.706523	5.13656	3.16445	2.77142	2.92067
chr1	37959938	37960662	0.270303	11.0224	7.34134	5.33469	7.76558
chr1	37988481	37989197	0.301351	17.8929	11.369	9.26925	10.6338
chr1	38011310	38011943	0.18577	2.9326	1.73585	2.33978	2.34286
chr1	38042468	38043053	0.00194724	16.0518	8.21042	3.88535	4.93679
chr1	38054579	38055968	0.255368	4.77955	3.44774	3.43928	3.18997
chr1	38185622	38187281	0.624367	5.42623	5.25374	3.33279	5.66217
chr1	38242166	38242934	0.0171799	13.8968	8.98934	4.88583	6.78992
chr1	38259601	38260053	0.461198	6.64223	4.24665	5.2699	4.73029
chr1	38449811	38450189	2.00548e-07	6.22286	3.89183	0.467843	0.371941
chr1	38844204	38844693	6.11459e-05	6.29222	3.88084	1.04635	1.05344
chr1	39057939	39058545	0.180295	12.6486	7.3459	6.64219	5.76957
chr1	39067477	39068075	0.000240238	12.6936	9.17047	3.32907	4.81721
chr1	39124728	39125261	0.0005246	3.33241	1.92924	0.119524	0.26398
chr1	39162436	39162634	0.294768	4.47804	1.91755	2.85142	3.88186
chr1	39397360	39397941	0.00871883	7.70063	5.34293	2.83263	2.53324
chr1	39448932	39449652	0.231237	12.2528	8.2718	6.54059	6.56737
chr1	39534662	39535972	0.0782107	4.4256	5.1964	2.48639	3.50382
chr1	39561090	39561573	2.56741e-06	9.47862	5.66735	1.30634	0.67487
chr1	39579312	39579814	0.0790813	9.98454	7.5454	6.67388	8.79331
chr1	39584304	39584705	0.447383	5.87025	2.73763	3.25406	1.74591
chr1	39586948	39587555	0.107954	11.4223	6.9193	4.8647	4.91697
chr1	39592528	39593194	0.866409	3.13182	1.99464	2.14653	2.31586
chr1	39633313	39634499	0.347354	4.01438	2.3881	2.16823	3.53516
chr1	39671762	39672182	0.245632	4.70704	2.85993	2.30091	1.7641
chr1	39737323	39737850	0.00047959	7.81883	5.60206	1.1879	2.42656
chr1	39742595	39743327	0.210633	13.5794	8.88978	7.97624	10.3208
chr1	39815278	39815782	0.204269	4.90987	2.72213	4.16144	2.93425
chr1	39816079	39816611	0.374936	3.06002	3.46254	3.09114	3.05185
chr1	39817972	39819197	0.0997939	8.97468	6.55742	6.21186	7.33062
chr1	39956847	39958955	0.684108	4.18493	4.08579	2.08418	3.93725
chr1	39959064	39959530	0.652071	2.40586	1.87275	1.70975	1.28018
chr1	39968343	39968883	0.150453	8.35032	4.72708	3.06227	2.34731
chr1	39993278	39993775	0.784775	11.9377	8.37311	5.9372	6.50276
chr1	40039928	40040408	0.9717	4.66882	2.41119	2.59954	2.77953
chr1	40057771	40058263	0.253095	4.00565	2.13456	1.39349	0.888641
chr1	40171985	40172756	0.463413	10.4529	7.96994	5.96412	5.55135
chr1	40173130	40173599	0.785058	9.86046	8.13064	5.69371	6.0208
chr1	40228568	40229319	0.0964181	5.50811	4.72132	1.75434	2.62201
chr1	40281365	40282303	0.20537	4.77731	2.83371	1.46108	2.33725
chr1	40350727	40351165	9.97912e-05	5.72007	3.22494	0.533157	0.431085
chr1	40435335	40436097	0.0709072	17.9406	14.4774	11.98	14.4417
chr1	40436818	40437444	0.547375	10.4094	6.3959	6.25093	4.72662
chr1	40601436	40601910	0.287755	19.3049	16.3262	13.74	16.6538
chr1	40636595	40637130	0.0914274	7.27623	6.81847	3.2969	2.95137
chr1	40859590	40860216	0.60805	3.58605	2.73049	1.99745	2.41655
chr1	40901363	40901907	0.141563	9.21256	5.44038	3.33914	4.10896
chr1	40935886	40936501	0.0133992	9.4009	4.10922	2.49534	2.13409
chr1	41209320	41209877	0.588665	16.3274	10.1827	8.95965	11.3411
chr1	41215124	41215444	0.000208548	3.13597	1.78928	4.2551	4.56976
chr1	41321053	41321511	0.00477542	10.5851	7.78502	3.59391	3.72178
chr1	41331393	41331838	0.0158644	7.4495	5.385	2.42412	2.98095
chr1	41446882	41447454	0.00470897	5.2152	4.44933	6.44391	6.43595
chr1	41612433	41612857	0.678009	3.73731	2.33667	1.34942	2.39404
chr1	41615805	41616477	0.00299645	4.76517	3.99831	1.27373	1.87053
chr1	42748035	42748442	0.786286	3.72114	2.33336	3.34776	0.63696
chr1	42836590	42837034	0.00100424	5.21339	4.72247	1.15899	0.567255
chr1	42971827	42972399	0.0164131	11.3064	8.04097	2.4916	4.18019
chr1	43122732	43123147	0.234029	7.89086	5.05168	3.41492	3.32989
chr1	43167342	43167842	0.127934	6.94461	5.70372	3.06812	2.14211
chr1	43169782	43170238	0.00410928	7.86601	4.46018	7.9554	6.69618
chr1	43196316	43197170	0.961215	15.6949	12.4123	10.2998	11.5367
chr1	43199956	43200608	0.0126444	6.96654	6.04563	2.1848	3.23586
chr1	43209404	43209926	2.11187e-07	1.28055	-0.0437669	5.75028	3.87722
chr1	43220384	43221211	0.368345	5.19354	2.69836	3.23682	3.49823
chr1	43225440	43225831	6.77133e-05	1.70849	0.802177	4.78719	3.74208
chr1	43321064	43321838	0.469198	13.4397	8.96766	9.01616	9.01852
chr1	43326531	43326875	0.607374	5.70408	2.61056	1.66233	2.80924
chr1	43356230	43356862	0.630355	12.7483	8.57807	6.37576	7.31605
chr1	43362118	43363061	0.787193	4.58011	3.71835	3.0763	2.42716
chr1	43415054	43415458	0.00841276	2.41085	1.10609	4.34831	2.46664
chr1	43442057	43442259	0.00230709	1.72069	0.583786	2.24616	1.59144
chr1	43501853	43504410	0.119239	8.04152	6.62789	4.31452	4.92014
chr1	43531307	43531661	0.00807873	3.06418	1.4399	3.52789	3.18008
chr1	43692507	43692946	0.00129315	6.24465	5.61824	1.6903	1.32487
chr1	43771770	43772188	0.00459776	3.97462	3.40527	0.0144886	0.815128
chr1	43772306	43772644	0.284471	1.3752	2.5146	0.842891	0.525724
chr1	43794777	43795499	0.035989	15.3098	11.1971	6.37253	4.895
chr1	43816808	43817565	0.500984	14.8623	12.504	12.059	10.5242
chr1	43883892	43885161	0.0311593	5.17594	4.15858	2.15578	2.65503
chr1	43955757	43956383	0.236894	5.05994	2.26933	1.6419	1.36798
chr1	43959471	43960207	0.393788	15.3287	11.4775	10.1712	10.8794
chr1	43990232	43991216	0.75235	3.14551	2.10303	1.6315	0.942188
chr1	44098435	44099255	0.232821	8.56944	5.3763	2.36962	4.32413
chr1	44121417	44121818	0.26424	6.92731	3.7242	1.29806	2.91874
chr1	44158948	44159628	0.949308	4.21647	2.66597	1.76911	2.12645
chr1	44176554	44177069	0.548412	4.35213	2.9948	2.87092	2.53324
chr1	44204787	44205139	0.598655	1.97904	1.49056	0.350154	0.0624689
chr1	44285896	44286241	0.000268523	4.91256	3.88853	0.50954	-0.129207
chr1	44294082	44294513	0.00578125	3.75633	1.99887	0.401077	-0.0517428
chr1	44802508	44803062	6.39813e-07	9.6685	6.45125	2.05757	2.25481
chr1	45370698	45371095	0.0562625	5.64592	3.30508	1.71848	2.73392
chr1	45488659	45489164	0.0292576	7.18038	4.21874	1.80825	1.42358
chr1	45684519	45685137	0.0383921	8.30228	4.67003	3.68475	2.59751
chr1	45729552	45729954	0.360383	5.45984	3.33854	1.55887	3.40033
chr1	45822642	45823413	0.0261555	8.30462	5.63157	3.17761	3.43929
chr1	45852177	45852767	0.995558	3.72537	2.70297	1.73678	2.38775
chr1	45873666	45874261	0.504327	14.1742	11.0393	7.62504	9.25337
chr1	45881860	45882628	0.0146023	23.9202	19.1509	16.9094	18.5595
chr1	45894645	45894955	0.0106226	2.74156	3.24144	3.66535	3.14031
chr1	45977533	45977999	0.33234	3.16267	1.7848	1.46241	1.51886
chr1	45982244	45983140	0.531321	5.01941	3.75909	2.93022	3.07995
chr1	45988089	45988436	0.548928	4.45359	2.16127	2.45456	3.82041
chr1	46075167	46075640	0.229061	8.31501	3.9952	3.71106	2.95387
chr1	46079134	46079582	0.581003	7.05669	4.38304	2.15968	3.46549
chr1	46123190	46123934	0.290443	7.97429	6.97563	3.59336	6.70463
chr1	46465160	46465716	0.162799	3.27629	2.29496	2.15568	3.17343
chr1	46465819	46466052	0.36231	2.30963	1.07702	0.493633	0.348971
chr1	46473394	46474294	0.253838	7.14919	4.27022	3.15452	3.33454
chr1	46637225	46637611	0.0313341	5.3018	2.59469	0.0104577	1.66957
chr1	46902937	46903329	0.00848052	2.67342	2.80033	0.592987	0.131948
chr1	46906504	46907175	0.689015	15.0801	10.4091	6.67975	8.98608
chr1	46909583	46911091	0.0245261	4.06819	2.65652	1.74115	2.15571
chr1	46971111	46971695	4.9233e-08	10.4821	6.96986	1.1778	1.63126
chr1	46981870	46982224	0.667511	4.78801	3.38269	2.72584	2.24906
chr1	47027276	47027725	0.889124	6.27396	4.61207	4.17017	2.8306
chr1	47334589	47334941	0.0169076	3.72823	2.88711	1.2917	0.641646
chr1	47866328	47866861	4.36569e-06	8.96196	8.10747	1.71344	1.62018
chr1	50888436	50888908	5.8889e-06	8.56227	5.82254	0.966135	1.68798
chr1	50983734	50984473	0.355157	2.2059	1.92279	0.850318	0.928316
chr1	51019009	51019776	0.687472	20.0281	16.063	11.3874	15.7113
chr1	51307168	51307432	0.0441485	3.35756	2.12565	4.49664	2.91505
chr1	51321930	51322246	0.0231412	2.44673	2.11591	5.01522	2.87028
chr1	51345203	51347207	0.750593	6.17227	4.54163	3.60885	4.22665
chr1	51347422	51347858	0.070349	2.32243	2.12789	3.90005	2.28602
chr1	51390325	51391251	0.473993	13.7267	8.681	6.68736	8.53318
chr1	51515854	51516351	0.649945	8.6792	6.15529	4.56989	7.47225
chr1	51523194	51523764	0.0287234	8.72805	6.64682	2.89252	3.72665
chr1	51534279	51536109	0.703566	5.51506	4.0805	2.77361	4.10501
chr1	51565446	51566497	0.00449076	3.31774	1.93005	2.54569	2.85931
chr1	51605790	51606200	0.258902	4.05533	5.49181	3.33071	2.10505
chr1	51613454	51613909	0.0188124	5.26858	3.12032	1.26656	0.895386
chr1	51653607	51654313	0.387782	18.4397	12.8607	12.3685	12.8435
chr1	51657192	51657731	0.176099	8.85728	4.13891	2.84279	3.62435
chr1	51672220	51672729	0.72401	4.93184	2.93554	3.12722	1.23769
chr1	51701294	51701732	0.0752344	7.74998	4.53328	2.47199	2.96059
chr1	51725620	51726363	0.00112078	13.4729	9.72038	5.57164	6.19971
chr1	51728219	51728589	0.328216	4.26645	3.33689	1.68787	2.17215
chr1	51846110	51846647	0.781201	2.89099	2.55516	1.2807	1.59428
chr1	51906276	51906825	0.293239	4.0906	2.51952	1.5641	1.8093
chr1	51913344	51914181	0.744714	3.51513	1.91006	2.03863	1.55985
chr1	51971723	51973240	0.395803	11.2127	10.6878	7.07954	8.35225
chr1	52001491	52002168	0.738823	12.2409	7.49485	5.53562	7.17553
chr1	52055262	52055812	5.38913e-06	11.9126	6.64577	2.06883	1.42199
chr1	52060893	52061444	5.03305e-06	13.0694	9.19274	4.22746	3.92889
chr1	52143039	52143464	0.0203396	5.01012	2.91353	1.07985	1.25507
chr1	52155617	52156187	0.461175	16.3025	15.2611	9.16025	12.299
chr1	52157298	52157839	0.00102038	8.33745	4.38311	1.37034	0.1985
chr1	52170463	52171042	0.376763	8.72065	6.17318	5.30219	4.68675
chr1	52175876	52176864	0.207036	2.27346	1.92597	0.252005	0.468884
chr1	52203425	52203844	0.0266293	4.15507	3.22036	4.47286	4.72161
chr1	52226838	52227297	0.00362816	2.87298	2.10221	0.138752	0.516362
chr1	52289402	52290464	0.922524	4.36881	3.30508	3.00358	3.39214
chr1	52324264	52324905	0.00878284	4.04634	1.72531	0.197258	0.676361
chr1	52356379	52356867	0.231969	7.90247	5.15382	3.15169	3.8122
chr1	52358065	52358548	0.295734	10.6009	10.0174	6.10684	5.50921
chr1	52359512	52359846	0.582729	4.26516	3.26391	1.88436	2.43849
chr1	52443997	52444330	0.00230113	5.0767	4.21745	0.357956	-0.13385
chr1	52552429	52552892	0.0244799	3.60694	1.97173	0.137556	0.511911
chr1	52556248	52557247	0.00432311	5.37978	4.51033	2.23323	2.7961
chr1	52557588	52558177	0.653202	2.63852	1.61358	0.882725	1.51034
chr1	52687174	52688153	0.971448	16.4925	13.0227	10.3819	9.52686
chr1	52688464	52688832	0.336738	4.20386	1.67645	2.92723	2.70729
chr1	52704828	52705645	0.15329	10.1913	5.96294	4.09892	4.38116
chr1	52783421	52784441	0.0278844	4.84889	3.94941	1.68314	2.24761
chr1	52804841	52805515	0.340685	6.53576	5.40269	3.71981	3.49333
chr1	52855584	52856780	0.522648	3.43283	1.755	1.67184	1.157
chr1	52873685	52874781	0.976441	8.59216	4.74671	3.99304	4.54649
chr1	52901703	52902274	0.810189	3.3827	3.84245	2.59339	3.60968
chr1	52910783	52911254	0.00919026	9.16313	6.94964	3.85558	3.92614
chr1	53011953	53012425	6.96557e-06	8.96349	6.99839	1.92585	1.48384
chr1	53109887	53110528	0.0473065	10.6503	8.45781	3.98837	4.35576
chr1	53329416	53329937	0.00320149	7.62682	3.18741	0.993839	1.27318
chr1	53353662	53354280	0.913591	4.51217	4.08294	2.21804	3.29949
chr1	53370013	53370760	0.645021	4.67716	3.38304	2.44781	2.62607
chr1	53409249	53409872	0.189011	8.34594	5.99363	3.91993	3.41013
chr1	53772182	53773156	0.888006	9.09886	6.2044	4.60493	5.5421
chr1	53840953	53842082	0.281523	5.88536	5.05763	3.776	3.7301
chr1	53903325	53903855	0.112885	3.36419	1.95354	0.551455	0.782951
chr1	53947090	53947643	0.333169	13.5286	8.88435	5.54372	5.57054
chr1	53965912	53966450	0.00308076	13.8209	8.58193	6.01383	5.99429
chr1	53984401	53984918	0.819973	9.08214	5.96796	3.62273	5.53481
chr1	54095934	54096293	0.15723	2.58232	2.39864	0.641723	0.721888
chr1	54389776	54390209	0.0358194	4.54069	1.90411	1.05295	0.282232
chr1	54437978	54438701	0.0162719	7.5161	4.39757	1.89637	2.75429
chr1	54495295	54496139	0.630097	5.6375	4.14	2.89471	3.08962
chr1	54549030	54549520	0.201138	7.40815	3.43371	5.09112	3.98605
chr1	54570636	54571111	0.000221216	9.80261	3.45724	0.845089	0.631742
chr1	54613968	54614667	0.190015	2.82112	2.19179	0.674512	1.32579
chr1	54722760	54723510	0.0975306	11.604	6.87046	5.68294	4.89544
chr1	54889677	54890017	0.842665	4.40789	3.00027	2.50494	2.3414
chr1	54969750	54970211	0.00452789	7.0278	4.07503	1.11634	1.48691
chr1	54982493	54983574	0.0103815	11.5837	10.0755	6.78291	7.99029
chr1	55035962	55036522	0.700912	4.67959	3.10522	2.52867	3.61459
chr1	55040182	55040542	0.50114	2.69326	2.08344	1.57464	1.718
chr1	55109199	55110298	0.794943	3.98808	3.72253	2.49171	2.25499
chr1	55144831	55145565	0.540327	5.94048	3.90289	2.1823	3.59215
chr1	55187694	55188872	0.472014	4.19791	3.08376	2.17607	3.07735
chr1	55293872	55294413	0.0258771	4.34126	3.70674	1.17215	1.98667
chr1	55296054	55296594	0.029737	13.1953	9.75642	6.19388	6.20571
chr1	55357954	55358276	0.0913589	2.87813	3.12101	1.58735	0.701241
chr1	55439928	55440501	0.756296	11.2292	6.08906	4.55266	5.76482
chr1	55461172	55461807	0.812774	10.5021	6.96995	4.4705	5.69908
chr1	55462635	55463243	0.125554	1.96683	1.63715	1.03157	0.743845
chr1	55793095	55793645	4.60888e-05	17.2835	12.0756	5.05716	4.65054
chr1	55895008	55895434	0.00800522	3.99033	3.68006	0.944435	0.34758
chr1	55930747	55931528	0.379409	10.2735	5.73939	4.65819	5.3283
chr1	55943189	55943734	0.124266	14.2104	9.28654	6.67347	8.32513
chr1	55947541	55948017	0.000922107	6.97113	4.87935	0.607521	1.8294
chr1	56017070	56017653	1.63205e-07	13.2951	9.83081	2.43601	1.9331
chr1	56533728	56534230	2.27989e-05	5.07703	2.30573	0.348487	0.117905
chr1	56596423	56597749	0.121436	7.65841	4.61103	2.6206	3.03912
chr1	56810168	56810494	0.0314822	3.19618	2.93546	0.0154707	0.624306
chr1	56910713	56911147	0.0112097	3.64823	2.58988	0.915437	1.53673
chr1	57027620	57028066	0.0205383	3.6272	3.63204	0.0384795	-0.17536
chr1	57028365	57028710	0.63666	4.35612	4.72423	2.79966	2.56511
chr1	57028891	57030824	0.173736	5.3209	5.70713	2.74744	3.35628
chr1	57033773	57034493	0.330953	9.58251	6.13291	4.57728	5.26406
chr1	57048410	57048947	0.163736	13.5551	9.81082	6.2303	5.41879
chr1	57051846	57052279	0.266447	3.21302	1.70751	0.0139878	1.56567
chr1	57262261	57262941	0.0102059	7.43132	5.00705	2.75413	2.44856
chr1	57395912	57396362	0.000293123	8.30302	6.15562	2.1501	1.73728
chr1	57434258	57435352	0.0111518	4.24868	3.88526	1.62122	2.09572
chr1	57450852	57451299	0.000806495	8.30031	5.34336	2.55125	2.77671
chr1	57480478	57480971	0.0474147	11.6502	9.36368	4.71561	5.62332
chr1	57485644	57486340	0.0327403	14.1643	7.7802	6.04472	6.50017
chr1	57830698	57832744	0.847752	7.26497	5.59856	4.69955	4.91462
chr1	57852690	57853066	0.167896	4.50131	3.5101	2.12597	0.373914
chr1	57901859	57902810	7.75315e-05	2.8963	1.91868	3.46768	3.87749
chr1	57906741	57907215	0.0991894	5.30103	3.90862	4.18748	5.03511
chr1	58005835	58006483	0.000963668	11.544	9.48042	4.64169	5.44762
chr1	58026061	58027296	0.0175756	8.59387	6.18031	5.06061	5.46843
chr1	58052412	58053240	0.93609	3.27958	2.95908	1.3836	2.57116
chr1	58087541	58088458	0.851499	7.7868	5.62406	4.40297	5.57455
chr1	58201466	58201955	0.0620671	4.3417	3.01021	1.6295	1.31862
chr1	58213466	58214218	0.00135887	6.8212	4.51359	2.41812	2.38699
chr1	58328014	58328430	0.351915	8.42267	4.43519	2.59513	3.86507
chr1	58352974	58353751	0.107554	15.6097	12.7309	8.76129	9.48978
chr1	58398033	58398858	0.0694071	3.9358	3.42796	1.58492	2.12661
chr1	58410312	58410835	0.250598	7.72629	5.87851	4.98708	7.14414
chr1	58416288	58416856	0.161809	6.10259	3.65443	4.41278	5.07747
chr1	58448220	58448971	0.940754	3.9153	2.56238	2.65847	1.92569
chr1	58449782	58450913	0.415009	6.34996	5.42208	3.97341	4.20899
chr1	58453000	58453402	0.807436	5.67142	4.34032	2.27543	3.9069
chr1	58619318	58619731	0.432959	6.64015	2.27282	1.7989	1.62331
chr1	58641076	58641483	0.588071	7.48269	5.76843	2.24011	4.74215
chr1	58671400	58671641	0.000770007	2.57424	0.626841	3.75999	4.52707
chr1	58709198	58710199	0.201443	4.55929	2.7478	3.18239	3.2911
chr1	58734250	58734905	0.282221	10.2406	5.14126	7.10371	6.10276
chr1	58754342	58754854	0.598597	7.07168	4.16886	3.65607	4.85036
chr1	58768175	58768782	0.250498	4.00572	2.10894	2.53483	1.95434
chr1	58803715	58804137	0.00877095	5.30248	4.51236	5.50234	6.26
chr1	58818170	58818664	5.20305e-05	5.31744	2.26799	6.3089	7.38267
chr1	58826850	58827549	0.957956	3.70518	2.70532	2.51436	3.09311
chr1	58852138	58852645	0.803494	3.81428	3.42143	2.02652	2.44876
chr1	59008019	59008579	0.905196	4.69431	2.87992	3.04162	2.3566
chr1	59029723	59031505	0.78225	6.18107	4.02197	3.80132	4.44468
chr1	59050502	59050987	0.839552	8.09555	4.77435	6.31522	3.9964
chr1	59066082	59066523	0.07736	9.70105	6.57411	3.09711	4.14205
chr1	59124820	59125272	0.0483515	12.6075	6.92197	4.77779	5.41056
chr1	59127670	59128096	0.0795744	4.26408	1.67446	1.33599	1.19141
chr1	59176685	59177310	0.245439	2.35058	2.6465	2.09936	2.43802
chr1	59199584	59200072	0.138389	12.6327	8.54984	5.11401	5.86305
chr1	59201397	59201776	0.14314	3.66961	2.33062	0.759936	0.664286
chr1	59227170	59227568	0.128809	3.79128	3.96604	1.71671	2.10337
chr1	59268899	59269442	0.281049	3.51132	1.67452	1.78253	1.26278
chr1	59293547	59295276	0.19934	10.0358	8.01542	5.36213	6.21879
chr1	59304427	59304952	0.00587402	10.5519	7.13884	3.45784	3.62903
chr1	59368070	59368448	0.246738	4.29251	2.11165	1.05604	1.72447
chr1	59373379	59374135	0.132762	12.5748	8.30004	7.13038	8.28613
chr1	59444664	59445094	0.429692	3.14286	2.58825	1.5916	1.92992
chr1	59484014	59484398	0.268056	2.70753	2.06025	1.03432	1.7363
chr1	59538234	59540186	0.0479759	5.6888	5.17873	2.56819	3.77258
chr1	59544316	59545030	0.474148	3.25624	2.69498	1.92165	3.25121
chr1	59636950	59638178	9.11302e-05	3.55269	2.05963	3.70433	4.71389
chr1	59641244	59641947	0.642448	11.6638	9.28289	5.4852	8.47221
chr1	59680027	59680642	0.21319	16.9756	10.4577	8.57334	11.7866
chr1	59727567	59727960	0.241774	2.27572	2.05933	-0.118339	0.178508
chr1	59758698	59758991	0.126559	3.42397	3.10103	1.35791	1.26307
chr1	59819482	59820985	0.240666	4.13931	4.11302	2.76964	3.22461
chr1	59821347	59821769	0.16285	4.20687	4.25835	3.76323	4.74097
chr1	59940501	59941196	0.874552	14.4633	9.95375	7.50928	7.15011
chr1	59969660	59970803	0.00843565	4.19171	2.71472	1.35779	1.42475
chr1	60057061	60057657	0.0831103	5.77953	2.65599	3.90372	4.15542
chr1	60192550	60192873	0.279624	2.15618	2.21894	0.190748	0.481072
chr1	60215265	60215821	0.646535	14.7395	10.6747	7.85513	8.67438
chr1	60236733	60238131	0.782915	3.55744	2.24026	2.12358	2.65434
chr1	60399871	60400421	0.0516574	2.96255	2.93219	2.28398	3.28209
chr1	60466478	60467210	0.90211	3.10873	2.24508	1.7155	1.95039
chr1	60485627	60486214	0.00265952	11.0156	8.30879	4.0617	3.38525
chr1	60586978	60587319	0.0990516	2.38851	3.15323	0.675498	1.04222
chr1	60622046	60624549	0.585142	8.74327	6.69953	4.54434	6.90987
chr1	60655784	60656593	0.0306143	2.96602	1.93512	1.97649	2.81029
chr1	60693694	60694242	0.000348366	1.14225	1.21458	2.59131	2.23222
chr1	60719264	60719699	0.241507	2.15112	1.80117	2.4774	2.06979
chr1	60724674	60725479	0.0130621	3.08311	1.76045	2.40494	2.67227
chr1	60725944	60726259	0.425496	3.55115	3.03765	1.80528	1.45713
chr1	60879680	60880218	7.21371e-05	6.51879	5.15062	1.58851	1.36407
chr1	60883716	60884391	0.43699	8.81063	5.65766	4.29141	4.35094
chr1	60916366	60917968	0.816709	9.79538	6.856	6.30782	5.76182
chr1	60925117	60925667	0.00881584	4.77201	4.1839	2.06516	1.36141
chr1	61011658	61012121	0.00839068	5.75272	4.26519	1.34957	2.153
chr1	61017914	61018416	0.298994	7.68525	4.2659	2.15344	2.70951
chr1	61111971	61112535	2.51793e-05	8.12948	5.78613	2.82638	3.14169
chr1	61237937	61238441	0.000165868	10.634	6.96484	2.14091	2.82389
chr1	61354814	61355331	0.0131408	9.97681	5.52414	2.86765	2.83874
chr1	61433646	61434516	0.954165	15.544	11.2265	10.6981	10.2075
chr1	61685075	61686346	0.0873238	7.84036	5.28245	3.67469	3.86241
chr1	61817695	61818281	0.0367239	17.8729	14.1197	10.6402	13.3559
chr1	61826459	61826849	0.000159072	3.08805	2.25497	4.07122	5.0055
chr1	61893062	61893655	0.18655	8.18867	5.27888	3.06369	3.93257
chr1	61971447	61972121	0.000487397	10.2376	7.49539	3.63275	4.01609
chr1	62018435	62019083	0.145673	2.63174	1.80408	0.45275	0.480331
chr1	62065749	62066947	6.58418e-05	9.73305	5.94406	2.09329	1.85205
chr1	62124503	62124954	0.00547123	4.02215	1.74613	0.762184	0.254509
chr1	62221559	62222103	0.0160044	5.04408	4.20243	1.26796	1.9894
chr1	62256240	62256602	0.0151885	3.40958	3.97194	1.25333	0.910504
chr1	62743483	62744024	0.0815007	11.5928	8.19331	5.03084	6.10518
chr1	62747507	62748109	0.000209177	12.7941	10.1735	4.15054	5.77077
chr1	62749400	62750454	0.0284462	4.29505	3.57951	1.7893	3.14328
chr1	62752854	62754413	0.651332	4.36626	3.42097	2.73842	3.51367
chr1	62832775	62833246	0.123227	8.36482	3.72091	4.57904	5.75156
chr1	62866683	62867115	0.285663	4.91959	3.34627	3.15447	4.94878
chr1	62975974	62976648	0.0413833	11.2053	7.76458	3.11637	5.03425
chr1	63010772	63011383	0.0157538	12.3431	9.06731	4.3627	4.85464
chr1	63032824	63033253	0.00108941	10.1413	7.80113	8.05905	9.5868
chr1	63161030	63161506	0.622933	5.50944	4.50669	2.7509	3.83812
chr1	63227531	63228071	0.467541	11.5455	7.69443	4.73296	6.50759
chr1	63229188	63229629	0.607856	4.37139	2.63286	2.06779	1.86503
chr1	63450147	63450760	7.6521e-06	9.99369	7.16564	2.23446	2.94533
chr1	63492303	63493308	0.686043	6.10227	4.63498	3.84861	4.27104
chr1	63601203	63601886	0.429566	3.23293	1.6032	2.66205	2.62779
chr1	63613638	63614047	0.301107	4.55158	1.056	2.91624	2.75349
chr1	63704545	63704993	0.532138	4.65546	3.95371	2.54332	2.46454
chr1	63706076	63706581	0.809953	11.3576	7.67707	6.28789	8.05147
chr1	63715353	63715699	0.557683	4.80329	3.03267	1.64109	3.71376
chr1	63776739	63777629	0.416665	2.58526	1.74592	1.09854	1.56272
chr1	63809564	63810432	0.751617	14.8787	11.3714	9.67098	9.7269
chr1	63822967	63823841	0.00081648	5.69725	5.12124	5.45777	7.09648
chr1	63963431	63963976	0.0173995	2.07036	1.61482	3.33118	2.52341
chr1	64000096	64000385	0.234558	4.0023	2.31291	2.74631	2.61237
chr1	64023307	64023934	7.46869e-12	2.71755	1.53983	5.2519	8.75814
chr1	64027405	64027738	0.335543	3.12508	2.84082	2.72127	2.43509
chr1	64044642	64045973	0.780447	6.85225	5.26988	3.63012	4.49996
chr1	64067162	64067681	0.478454	6.84426	8.22549	4.81498	7.60602
chr1	64067875	64068370	0.0697604	5.4703	4.37071	4.23695	7.85448
chr1	64068554	64068787	0.0980955	2.30963	2.51866	2.91856	3.23755
chr1	64072953	64073275	0.516194	2.41406	2.62696	1.94183	2.47188
chr1	64083141	64084045	7.19894e-05	4.23957	3.84107	5.46606	5.94607
chr1	64134905	64135142	3.56475e-05	1.47343	1.75934	4.53418	3.62017
chr1	64165112	64166293	0.0535893	3.08664	2.72437	2.36001	3.37437
chr1	64166555	64168066	0.956087	5.21975	4.21354	3.34942	4.40143
chr1	64168207	64169750	0.671131	6.49211	6.91333	4.90752	7.17236
chr1	64272481	64273274	0.000313355	3.03272	2.81888	4.36574	5.79053
chr1	64322048	64322426	0.803999	2.55446	1.76977	0.761941	1.68515
chr1	64352206	64352417	0.0298266	2.7504	1.34533	3.75197	2.69772
chr1	64392419	64393112	0.702908	6.13489	5.74086	2.87044	3.90099
chr1	64465143	64465521	0.00390608	4.58641	3.29564	0.898311	1.01911
chr1	64488965	64489607	0.443438	4.98964	3.97721	2.82865	4.24516
chr1	64492520	64492991	0.593361	10.7248	8.2686	6.7344	6.53073
chr1	64494377	64495185	0.0409144	13.9644	10.2773	8.64849	9.09372
chr1	64578492	64579851	0.52761	4.81117	3.22348	3.02266	3.09357
chr1	64663519	64664860	0.368188	12.3419	8.37956	6.31369	8.49846
chr1	64736739	64738178	0.98006	3.39503	3.01861	2.14755	2.06798
chr1	64751825	64752303	0.177959	6.3018	4.78147	4.98597	3.75242
chr1	64756394	64756922	0.990451	12.1844	5.60493	5.37665	5.19493
chr1	64764022	64764602	0.415776	14.5354	7.13887	6.07264	5.2732
chr1	64782725	64784399	0.940259	13.4925	12.5721	9.30273	10.802
chr1	64784525	64786125	0.850242	5.0842	4.21272	3.87207	4.54879
chr1	64833972	64834711	0.712088	4.54559	3.53595	3.2315	2.13775
chr1	64843826	64844175	0.00654692	3.64624	0.952574	4.22389	4.21241
chr1	64855526	64856664	0.448443	6.25541	4.25887	3.6483	4.5777
chr1	64867215	64867787	0.281134	3.78	2.74238	1.1954	1.97021
chr1	64872775	64873405	0.736178	3.74856	3.34171	2.16624	2.54245
chr1	64906449	64907258	0.355671	3.49403	2.33306	2.53317	2.65907
chr1	64960359	64960772	0.0416386	3.64062	2.43499	0.283898	0.977588
chr1	64965228	64965992	0.973706	10.1441	7.08347	6.01737	7.00035
chr1	65003182	65003711	0.217912	2.93463	2.5028	2.68993	2.27007
chr1	65032667	65033207	0.00532571	9.40777	5.35792	3.1578	2.6839
chr1	65056589	65057296	0.585842	10.7355	6.6383	4.66275	7.87333
chr1	65092950	65093359	0.387985	9.41507	8.88692	4.84641	6.694
chr1	65158568	65159096	0.649593	15.0908	10.1181	8.2709	11.1414
chr1	65224671	65225333	0.026336	9.13894	6.56337	4.2976	3.7975
chr1	65225494	65226166	0.389339	8.89689	7.89214	4.22322	6.83162
chr1	65358661	65359237	0.434916	12.77	7.04049	5.41758	5.7927
chr1	65359412	65359921	0.00298616	10.8937	11.4183	3.56632	4.31089
chr1	65700991	65701413	2.17671e-05	6.65166	5.86268	0.687468	1.3605
chr1	66146304	66146899	1.59417e-05	6.02687	3.94886	1.05237	1.33963
chr1	66151054	66151514	0.309495	5.6917	3.96388	4.55424	3.97974
chr1	66151773	66152200	0.511433	10.465	9.91604	8.08961	8.66858
chr1	66221414	66222368	0.146171	3.204	3.12789	1.26153	1.41524
chr1	66291562	66292020	0.0850487	3.05601	2.17909	0.267087	0.905767
chr1	66702208	66702723	0.054661	8.08862	5.18577	2.21112	3.28177
chr1	66747321	66748160	0.26471	4.38427	2.58927	2.85042	2.37393
chr1	66859737	66860096	0.119012	2.58996	2.4601	1.11177	0.876698
chr1	66863766	66864966	0.23996	3.70078	6.04925	1.29672	4.10613
chr1	66885050	66885479	0.502492	8.25118	4.24965	3.30844	2.96226
chr1	66909033	66910155	0.673559	3.8868	3.05954	2.08698	2.29479
chr1	66942112	66943071	0.139329	6.3875	4.49826	2.54795	3.02126
chr1	66987413	66988044	0.829464	11.415	4.82647	6.28646	5.64132
chr1	67039263	67039709	0.00600002	7.34669	2.78547	1.28301	0.656059
chr1	67060751	67061230	0.0320573	4.83898	2.51661	1.19058	1.14492
chr1	67085233	67085539	0.27575	2.27109	1.67787	0.392733	-0.0126259
chr1	67107898	67108685	0.000117776	11.2197	8.92299	4.47228	4.23215
chr1	67227695	67228215	1.9776e-05	13.4748	11.1985	5.2375	4.65461
chr1	67264847	67265301	0.00036147	5.528	2.65489	0.505513	0.799762
chr1	67686949	67687375	0.298939	4.44122	2.43858	0.676289	1.83493
chr1	68153024	68153534	0.01123	5.22091	2.53091	1.2294	1.16995
chr1	68197172	68197613	0.143494	5.58479	3.67312	2.18701	2.15093
chr1	68548028	68548496	0.603074	3.23422	2.72557	1.94659	1.56766
chr1	68827305	68827739	0.143567	2.92743	2.1558	1.174	0.998908
chr1	69135862	69136317	0.00473964	7.37058	3.78733	1.50212	2.36984
chr1	69165104	69165553	1.47374e-05	7.30077	4.61207	1.02451	1.17158
chr1	69185266	69185985	0.66756	11.2537	7.74783	6.24006	6.66921
chr1	69211745	69212215	0.023592	6.14897	4.33597	2.05665	1.37181
chr1	69288257	69288917	0.221228	20.241	18.809	15.636	16.5633
chr1	69377917	69378678	0.913326	10.6352	8.41045	6.56366	7.77846
chr1	69480179	69480579	5.85343e-07	2.34231	0.784173	3.97727	4.34333
chr1	69731384	69731793	0.0171591	3.96795	3.83265	1.11459	1.47633
chr1	69733612	69733856	0.722952	2.22278	4.90145	2.55179	4.30499
chr1	69734113	69734894	0.895055	3.18653	3.11774	1.39808	2.82059
chr1	69735472	69736164	0.571928	15.0914	10.7025	9.1867	9.56571
chr1	69822110	69822585	0.000430515	8.43897	4.96761	1.56247	1.93468
chr1	69831653	69832191	9.567e-05	10.823	8.60245	3.7034	4.34048
chr1	69836814	69837327	0.154245	11.1086	6.64152	3.43604	5.15867
chr1	70043589	70043856	0.197035	2.60159	2.82114	1.06242	0.872955
chr1	70174575	70175093	0.0346606	8.63009	5.85601	3.83832	4.28609
chr1	70316697	70317385	0.00284438	9.74613	5.70225	3.14275	3.54649
chr1	70833718	70834181	1.45548e-08	6.08169	5.48769	0.862583	0.680196
chr1	70879806	70880248	2.41296e-05	9.92439	7.84862	2.32159	2.17096
chr1	71148807	71150492	0.139463	3.64192	3.18454	1.76689	2.02397
chr1	71277787	71278271	0.0116147	3.5103	2.8197	0.710324	1.23267
chr1	71336067	71336662	0.0701994	9.12568	6.11349	3.0653	3.58884
chr1	71408473	71408722	0.0528405	2.32134	2.59448	0.0161886	-0.50546
chr1	71552434	71552863	0.904589	7.5508	4.93866	4.75531	3.6706
chr1	71578068	71578690	0.12576	15.0499	8.7576	5.02243	7.26653
chr1	71603307	71604133	0.880966	4.31351	3.50407	2.96873	2.78387
chr1	71697156	71697746	0.19286	2.81555	2.31397	0.591482	0.86685
chr1	71699003	71700832	0.264022	7.22242	5.47845	3.17601	4.99417
chr1	71721973	71722461	6.13189e-05	8.21181	7.07962	1.74059	2.6658
chr1	71769356	71770800	0.0537863	4.27026	2.83596	1.66399	2.19716
chr1	71933143	71935311	0.323649	3.88467	2.59305	2.26245	2.13319
chr1	71940042	71940540	0.146329	5.81773	3.14117	3.99621	3.46047
chr1	71984608	71985464	0.461358	3.48052	2.97947	1.66946	1.07874
chr1	72117059	72117495	0.00054295	3.13749	1.2023	4.2896	4.05373
chr1	72169672	72170644	0.283413	11.4878	8.85762	6.01818	7.35881
chr1	72188327	72188887	0.565574	11.7566	6.25691	4.76472	6.11675
chr1	72258487	72259180	0.081578	7.12765	4.79031	3.69682	3.83657
chr1	72266537	72266956	0.565368	3.87348	3.28242	3.9204	2.51124
chr1	72330540	72331152	0.0253224	3.991	2.47196	3.62	4.49522
chr1	72353193	72354188	0.58231	3.70586	1.76651	1.88818	2.26693
chr1	72360188	72360830	0.624981	13.6835	9.30963	8.38983	8.5135
chr1	72418827	72419508	0.00146713	2.63346	1.63456	2.51829	2.73862
chr1	72496318	72496714	0.094858	1.86363	1.13831	3.29249	1.54344
chr1	72583427	72583963	0.8067	3.75427	1.91112	1.49818	1.38968
chr1	72611280	72611562	0.000268554	1.52099	0.536027	3.8132	2.87392
chr1	72629946	72630208	0.000421897	2.35823	1.04238	3.23631	3.30437
chr1	72645851	72646647	0.746195	2.866	2.54359	1.29296	1.67262
chr1	72763497	72764002	1.81368e-05	5.34316	4.98846	0.800983	0.931776
chr1	72765377	72766005	1.35903e-08	8.71906	5.80407	1.64151	1.09782
chr1	72901265	72901972	0.0751918	22.0964	20.3411	11.5539	14.3622
chr1	72912336	72912834	0.20665	11.9083	6.95991	7.28378	7.88909
chr1	72922579	72923115	0.000359003	6.5482	4.04435	1.49065	1.71491
chr1	72924325	72925044	0.0606785	9.06293	4.41653	4.1164	2.95006
chr1	73665008	73665711	0.00727879	12.0505	10.2727	4.28193	5.75524
chr1	73676768	73677359	0.698938	5.68431	4.27581	3.46599	3.47515
chr1	73729382	73730808	0.00762735	6.13106	3.57318	3.74562	4.94994
chr1	73732396	73732629	5.84234e-05	1.9864	0.712395	3.88853	3.23755
chr1	73762139	73762507	0.0983815	4.81878	3.41493	0.930881	1.117
chr1	73783534	73784244	0.634845	16.9724	16.9807	9.74224	9.80433
chr1	73870871	73871397	0.00418641	3.23315	3.25609	4.31649	3.7771
chr1	73872645	73873413	0.0441134	17.1515	12.6241	11.37	13.45
chr1	73948020	73948565	0.600066	6.70975	4.67075	4.68221	4.20351
chr1	74033201	74033595	0.247008	8.10147	3.13414	5.46397	4.72922
chr1	74042777	74043228	0.11203	5.83243	2.66379	3.53074	3.9436
chr1	74090201	74090663	0.00213883	2.61081	2.03229	4.05308	3.16824
chr1	74094079	74094588	0.00474563	3.18723	1.83104	3.23253	3.08021
chr1	74100533	74100827	2.95785e-06	0.666627	0.439223	2.88868	3.41166
chr1	74104776	74105511	0.00317712	3.37073	2.21019	3.17197	2.93655
chr1	74115223	74115463	0.329462	1.76322	2.24553	0.950194	2.74285
chr1	74116113	74116319	0.0492493	2.81684	3.0075	2.76566	4.48481
chr1	74123817	74124273	0.94935	15.8524	12.2239	10.8178	11.4014
chr1	74129332	74129792	0.147752	9.88889	6.64077	7.51492	6.96843
chr1	74168530	74169017	2.62883e-07	1.13568	0.84188	3.03772	3.05906
chr1	74170792	74171321	0.160013	2.27038	1.60096	2.26741	1.22585
chr1	74171538	74172216	0.0665462	12.3363	9.47111	11.3713	10.8352
chr1	74178661	74178908	0.032217	1.25876	1.49407	2.28804	3.30956
chr1	74242480	74242964	0.399873	5.81836	2.86532	3.04817	3.63717
chr1	74252366	74253031	0.0129164	11.4868	8.41994	8.52913	7.83465
chr1	74282795	74284053	0.230817	2.67722	2.35192	1.77702	1.96712
chr1	74295955	74296502	0.63962	3.60865	1.52099	0.743287	1.53799
chr1	74315339	74315600	0.413613	2.66642	1.6404	0.235886	1.14775
chr1	74331004	74331454	0.0220905	4.96413	3.62435	4.54286	4.29002
chr1	74333744	74334252	0.99277	6.14381	6.28458	4.35766	4.8592
chr1	74341703	74342669	0.00825322	4.48255	2.77454	4.06564	4.37025
chr1	74350239	74351225	1.02031e-05	3.02767	2.09478	3.1168	3.7249
chr1	74359753	74360468	0.48571	16.9134	12.1297	9.21142	11.7326
chr1	74367947	74368459	0.26016	3.02115	2.59342	2.66649	2.17159
chr1	74378856	74379356	0.000947185	4.8036	3.38725	4.88432	4.90705
chr1	74408308	74408973	0.0215937	12.2302	7.77462	8.10617	8.68219
chr1	74433095	74433950	0.922062	5.20519	2.90452	3.26116	2.44237
chr1	74437062	74437559	0.00134334	7.14385	5.85706	2.29307	1.44645
chr1	74437732	74438253	0.685103	2.01802	2.243	2.08863	1.77104
chr1	74438436	74439163	0.168979	3.35299	1.82209	2.96883	2.66792
chr1	74443903	74444413	0.975608	15.4636	10.8811	10.678	11.3012
chr1	74444554	74445112	0.044645	3.60652	3.3877	1.33952	1.32166
chr1	74484684	74484882	0.005192	3.51056	1.43321	3.1569	2.76162
chr1	74499032	74499745	0.997272	9.73424	5.27909	5.33741	4.90995
chr1	74506834	74507255	0.119474	6.51101	3.34551	3.2367	2.7896
chr1	74553175	74553484	0.617306	1.88092	2.00823	0.565448	1.12577
chr1	74634080	74635145	0.541134	3.17483	1.84172	1.13871	1.20497
chr1	74690469	74691146	0.0341117	5.12352	2.37244	3.18777	3.79041
chr1	74708294	74708862	0.211596	2.99934	2.12298	1.70599	2.63668
chr1	74806231	74806834	0.306364	12.206	10.3712	8.18669	10.053
chr1	74809601	74810119	0.947306	6.11023	3.83451	3.51032	3.44886
chr1	74830765	74831460	0.238945	6.39191	3.28503	3.03543	3.53737
chr1	74834409	74834890	0.0307739	9.3696	5.28275	8.01998	8.50617
chr1	74838333	74838766	0.00185487	2.50642	1.28884	3.02112	2.90062
chr1	74849325	74850009	0.633052	9.42563	6.99039	7.47601	8.16466
chr1	74854453	74855194	0.0847265	11.4631	8.10161	8.03653	10.0354
chr1	74901320	74901907	0.0151925	2.30603	1.6701	2.90539	1.97672
chr1	74927225	74927848	0.704525	11.3806	8.09026	5.92373	6.6359
chr1	74962308	74962723	0.257503	3.61981	3.78685	1.78296	1.43712
chr1	74973214	74973742	0.0454049	11.2173	7.80624	4.62197	4.31042
chr1	74995130	74996594	0.05221	10.8786	7.62316	7.09498	8.41884
chr1	74997704	74998441	0.196729	2.26219	2.76192	0.782589	1.6654
chr1	75010951	75011643	0.30533	14.3036	8.95372	7.05342	7.5079
chr1	75020175	75020486	0.310695	2.49035	2.33974	2.9164	2.73766
chr1	75047023	75047478	0.00233731	8.30245	4.34001	2.24874	1.31106
chr1	75063154	75063994	0.995694	12.9196	8.54663	7.09892	8.21792
chr1	75098527	75099098	0.199586	12.3551	6.94597	6.55969	7.25219
chr1	75120956	75122000	0.0545452	7.38922	6.56901	4.62323	6.73458
chr1	75137690	75138489	0.692547	2.85526	1.99189	1.93153	2.1119
chr1	75138899	75139749	0.294878	7.66943	5.39193	5.41403	4.55587
chr1	75164776	75165258	0.957044	2.65645	0.904564	0.954511	1.19149
chr1	75165357	75165793	0.54865	3.01474	3.12942	1.18715	1.85227
chr1	75175853	75177080	0.482674	2.79632	1.86705	1.94897	2.33763
chr1	75178712	75179194	0.749274	6.15564	2.93115	3.52862	2.16826
chr1	75188033	75189497	0.55782	3.65343	2.34964	2.18146	2.80858
chr1	75207213	75207930	0.482509	4.03557	1.9872	1.75134	1.52044
chr1	75210980	75211526	0.437318	3.56749	2.4106	1.77645	3.34696
chr1	75214970	75216541	0.647067	4.13086	2.07112	2.50287	2.45911
chr1	75231143	75231735	0.155397	15.4843	11.7826	11.2981	11.3482
chr1	75233128	75233810	0.378375	2.78463	2.43606	1.33816	1.70177
chr1	75244677	75245054	0.111782	2.98688	2.55824	3.32126	2.16109
chr1	75248099	75248659	0.75351	14.5658	9.91132	5.97487	12.684
chr1	75249604	75249921	0.114466	2.91473	2.79742	0.538496	1.49483
chr1	75250688	75251279	0.0643509	8.34642	5.1339	5.94784	5.58954
chr1	75287118	75287555	0.866129	12.1696	7.01474	7.13454	6.76619
chr1	75313157	75313978	0.0955739	2.26858	1.62718	0.358694	0.663853
chr1	75314421	75314838	0.864916	6.11931	4.58337	3.81309	4.30002
chr1	75339274	75340084	0.25861	12.8363	8.57445	6.17208	6.67642
chr1	75395279	75395667	0.01264	3.39381	2.58135	0.744955	0.877992
chr1	75422346	75422793	0.0519301	4.22382	3.00319	1.66012	0.654594
chr1	75442242	75442767	0.0237575	15.9742	9.19653	5.94285	6.26256
chr1	75463868	75464725	0.211439	10.7419	7.1499	6.62287	5.16374
chr1	75473668	75474436	0.00199649	11.5524	8.68526	3.78032	4.14332
chr1	75475409	75476617	0.0204147	3.81962	2.5897	1.52114	1.97477
chr1	75491689	75492201	0.0455422	6.77144	3.88704	2.44133	1.82419
chr1	75495933	75496570	9.98049e-05	8.69952	6.2633	2.58717	1.7578
chr1	75517704	75518254	0.267728	3.51911	2.99957	2.78971	2.99921
chr1	75518379	75518593	0.435979	3.24291	3.06829	3.44982	0.984181
chr1	75534059	75534618	0.1743	3.74497	2.32217	1.63389	0.424155
chr1	75542772	75543437	0.781944	4.8834	4.41283	2.56512	3.48505
chr1	75555918	75556603	0.0285082	20.5838	15.4264	6.30266	8.39648
chr1	75594144	75594661	0.250459	11.0334	9.93187	4.83357	6.42371
chr1	75649092	75649753	0.437184	5.89964	3.98599	1.89796	3.55653
chr1	75650114	75650688	0.0599978	10.198	8.61893	4.15001	4.83117
chr1	75922343	75922676	0.000918098	3.12096	3.09627	-0.661385	-0.13385
chr1	77047762	77048273	0.0162925	1.52024	1.82388	1.89394	2.85047
chr1	77078159	77078666	0.00376834	11.1532	9.19424	3.91346	4.62765
chr1	77180530	77180962	0.0213252	4.63375	4.41726	0.922002	1.63812
chr1	77509865	77510424	0.658181	7.30082	6.29487	4.67009	5.45125
chr1	77510687	77511782	0.880923	6.93747	7.34241	4.66881	5.61468
chr1	77511882	77513862	0.503719	9.82284	7.12109	6.45455	7.75189
chr1	77532550	77532904	0.0953005	4.04038	2.25441	3.68773	2.77208
chr1	77570271	77570711	0.000107055	4.05076	2.68006	-0.746781	-0.185852
chr1	77585959	77586371	0.0389188	3.47296	2.988	0.834158	0.629248
chr1	77691956	77692251	0.00842928	3.78644	1.4146	4.99105	3.21186
chr1	77745569	77745774	0.00573346	2.05612	2.33941	2.75944	4.18252
chr1	77875602	77875862	8.81977e-05	1.36995	0.523719	3.71531	3.18696
chr1	77892634	77893290	0.0120637	22.1245	17.9868	14.778	17.0543
chr1	77927161	77927659	0.0772587	12.5311	6.32821	3.99216	4.8449
chr1	77939543	77940270	0.78304	9.81528	6.26712	4.60982	4.6268
chr1	77968970	77969291	0.0256363	3.73269	1.55311	4.23246	2.67577
chr1	77975120	77975937	0.255992	12.7231	9.5934	6.94302	6.38793
chr1	78137353	78137731	0.0479112	2.66332	2.59108	0.614892	0.00943219
chr1	78212101	78212748	0.146783	5.37558	3.71733	1.84671	2.55025
chr1	78309565	78310016	1.49074e-08	1.55167	0.89318	3.76839	3.61524
chr1	78318663	78319627	0.150366	2.93709	1.89283	0.777	1.70849
chr1	78415967	78416678	0.29245	11.0132	7.79273	3.75849	6.14432
chr1	78451024	78451646	0.51911	7.06582	5.26521	4.93135	4.70913
chr1	78521744	78522274	1.39705e-05	7.19971	3.70618	1.72502	1.79715
chr1	78533387	78533833	0.229808	8.37116	7.56276	7.49187	8.62415
chr1	78553955	78554358	0.000279044	4.00645	2.29383	0.564319	0.459582
chr1	78598635	78599081	0.808201	4.51016	2.29591	3.56797	2.60024
chr1	78654061	78655780	0.292604	6.0045	5.34607	4.16795	4.6054
chr1	78683464	78683887	0.118556	3.01311	1.60803	2.81517	2.81159
chr1	78684637	78685141	0.589976	3.45298	2.75184	2.36563	1.77223
chr1	78703912	78704213	0.00203113	4.48078	3.17846	0.577076	1.18027
chr1	78720964	78721974	0.279456	15.187	12.0037	10.2229	10.3994
chr1	78722380	78722824	0.000469357	7.79072	5.0065	1.03147	1.76071
chr1	79354291	79354732	1.69559e-07	6.19149	4.41132	0.263624	0.386356
chr1	79436497	79436990	0.0175833	7.44389	5.679	2.30754	1.09739
chr1	79636671	79637137	0.199301	10.8337	6.24586	3.89469	4.08752
chr1	79679310	79679937	0.331438	4.98619	3.22809	1.63768	2.45398
chr1	79757932	79758455	0.218285	3.41439	1.65399	1.52763	1.94173
chr1	79772441	79773097	0.737415	3.25067	1.90597	2.1715	2.77524
chr1	79778989	79779430	0.0686196	7.58847	4.87247	2.69824	3.80626
chr1	79783058	79783661	0.0371188	11.5685	7.65838	3.76286	4.99888
chr1	79819388	79820030	0.000111244	1.7559	1.20412	3.36915	2.96267
chr1	79854374	79855197	0.0804232	3.5181	3.26561	1.80886	2.38386
chr1	80102793	80103359	0.0891772	7.22282	4.10485	3.30787	2.25965
chr1	80176595	80177156	0.980497	8.79931	5.98151	4.15224	3.77308
chr1	80177495	80178192	0.00360599	18.2322	14.3066	12.5251	16.8348
chr1	80191923	80192308	0.0899723	3.1138	4.16714	1.18127	1.46234
chr1	80205184	80205591	0.00974489	4.74916	3.43319	0.00991946	1.82031
chr1	80335036	80337301	0.273397	3.73295	3.48336	2.11819	2.38435
chr1	80337554	80338160	0.0879984	3.5796	1.48899	2.53567	2.85704
chr1	80405021	80405649	0.211507	11.535	8.17919	4.6169	4.71728
chr1	80414464	80415467	0.229865	3.70372	2.00029	2.37876	2.65583
chr1	80423960	80424994	3.59526e-05	4.08441	2.42357	0.401368	-0.17623
chr1	80443357	80445008	0.900211	4.69999	3.42942	3.03367	3.92271
chr1	80446700	80447275	0.509132	4.91586	2.71441	2.57538	2.74641
chr1	80501342	80501730	0.229987	5.17202	3.79178	2.20105	1.64183
chr1	80508930	80509609	0.00525786	9.36145	5.03648	3.01596	4.6694
chr1	80512282	80512899	0.298496	7.6882	6.35736	3.8678	6.47801
chr1	80719111	80719643	0.0105666	7.12627	3.80941	1.71855	1.51865
chr1	80798199	80798522	0.0265595	1.80389	2.55056	-0.15952	0.0340301
chr1	80826874	80827598	0.0933503	15.4231	13.7945	7.76096	6.96646
chr1	81283651	81284150	0.638508	9.95367	10.5643	5.23455	6.36528
chr1	81298206	81298664	0.571111	5.15625	2.72816	2.60271	1.84466
chr1	81306658	81307016	0.263364	7.20925	2.73543	2.68983	2.13103
chr1	81312981	81313776	0.080382	21.2153	19.4144	16.0482	16.7356
chr1	81513045	81513679	0.206622	11.0557	9.03625	5.47165	6.53831
chr1	81588227	81588636	0.330063	7.36234	4.52828	3.32896	3.00718
chr1	81626957	81627251	0.116002	1.46378	1.04181	2.11928	1.77504
chr1	81668402	81668895	0.00420426	4.33439	2.03911	1.15479	0.443421
chr1	81685287	81685783	0.0253475	5.28773	3.5496	1.15393	1.46435
chr1	81912927	81913913	0.0869756	5.44785	3.52196	2.07684	2.68648
chr1	81945821	81946253	0.108547	2.33753	1.53996	0.14974	0.196845
chr1	81946558	81947125	0.639901	2.93683	1.5328	1.10781	1.54943
chr1	81947697	81948448	0.679279	2.99362	2.0497	1.5967	1.77271
chr1	82147340	82147822	0.287041	4.10568	3.11438	1.55239	3.91323
chr1	82231158	82231559	0.0979601	4.53611	2.91255	1.42159	0.766568
chr1	82279688	82280081	0.296589	2.65965	4.20484	0.298309	2.37515
chr1	82286509	82288514	0.486429	9.9808	13.29	5.64269	10.4656
chr1	82290407	82291159	0.0568239	10.8098	6.17759	4.83624	5.47928
chr1	82312739	82313081	0.00626157	3.07517	2.60279	0.183131	0.573461
chr1	82313173	82313699	0.945354	3.02962	2.55903	1.20359	2.24058
chr1	82425779	82426051	0.945995	2.83099	2.3759	2.91362	1.21067
chr1	82429787	82430422	0.884855	12.6276	6.94636	5.27506	5.61146
chr1	82472856	82473226	0.00121884	4.36653	2.65758	0.31953	0.289992
chr1	82550887	82551401	0.592474	5.47409	7.33428	2.53613	5.14171
chr1	82568315	82568878	0.00432168	5.41301	2.89121	0.812046	1.65923
chr1	82638102	82638697	0.0845164	16.6939	11.6861	6.96369	6.94765
chr1	82721548	82721781	0.210224	2.67989	2.64363	2.68039	2.79306
chr1	82783855	82784795	0.459218	14.1422	11.7229	9.5997	10.9441
chr1	82789693	82790496	0.202057	6.63139	3.89516	2.91125	2.27228
chr1	82800189	82801020	0.866968	5.72228	4.23602	3.55132	3.38792
chr1	82812302	82812995	0.0364127	7.02461	5.4096	5.57444	6.43208
chr1	82828255	82829100	0.000128044	4.11584	2.43549	4.0974	4.46443
chr1	82835616	82836538	0.32956	11.456	10.4374	7.76474	9.95827
chr1	82836772	82837273	0.699799	2.00527	2.20014	1.02537	1.2871
chr1	82968659	82969040	0.213835	3.1464	2.06611	2.68171	2.72204
chr1	82969792	82970282	0.0482239	10.0521	8.84805	4.40184	4.84068
chr1	82984247	82984788	0.390856	7.8503	5.53173	3.04355	4.84433
chr1	83061279	83062020	0.960707	14.2969	10.0809	8.04199	11.1013
chr1	83072667	83073100	0.337835	6.68904	4.16683	3.41103	3.14028
chr1	83096246	83096776	0.0524193	4.66169	2.70786	2.9024	4.23806
chr1	83113169	83113684	0.00574713	2.86234	3.29643	3.42272	5.41937
chr1	83146715	83147228	0.0262218	10.2177	6.51857	2.11326	4.11093
chr1	83177982	83178463	0.19009	7.22407	3.37489	3.66836	2.26489
chr1	83183521	83184149	0.0881957	5.40678	3.52942	1.64473	3.8374
chr1	83214835	83215181	0.308549	2.24313	1.99674	1.31112	1.09162
chr1	83713627	83714057	0.146245	5.9092	4.57523	1.20133	2.67948
chr1	83723770	83724165	0.0750385	6.32729	5.41053	2.44362	3.72309
chr1	83732991	83733333	0.00169925	4.1697	3.22003	0.830112	0.682076
chr1	83742481	83743308	0.184379	14.2137	10.4842	6.86283	7.10012
chr1	83807789	83808188	0.000574583	5.98899	3.29841	1.9936	1.39253
chr1	83903170	83903927	0.88933	3.42348	2.2586	1.95702	1.76851
chr1	84098556	84099063	0.00126635	4.79695	1.97666	0.78588	0.635949
chr1	84125091	84125525	0.0780665	4.96651	3.62144	1.96132	1.74158
chr1	84150478	84150884	0.0240147	3.82827	2.7215	0.714494	0.464978
chr1	84283058	84283834	0.247127	7.41049	5.05136	3.0098	4.23453
chr1	84578364	84578725	0.0436271	4.38392	2.84589	0.946087	1.15918
chr1	84730420	84730818	0.219255	3.59482	2.85127	0.0278938	1.36764
chr1	84835962	84836297	0.8457	2.88956	2.20554	1.36308	1.7793
chr1	84836441	84837400	0.982163	3.78609	2.93795	2.19436	2.91291
chr1	84877619	84878331	0.474082	12.7702	8.5829	6.77315	7.3182
chr1	84881711	84882137	0.482465	5.34943	2.4904	2.0028	1.96545
chr1	87478116	87478490	0.018266	9.17165	5.02043	1.82658	3.52547
chr1	87632902	87633537	0.336109	12.3681	9.61083	6.69779	7.46851
chr1	87689658	87691484	0.257957	5.24638	3.63927	3.73972	4.37222
chr1	87707358	87707612	0.0358826	3.79663	1.87442	3.79479	3.32038
chr1	87716273	87716630	0.601159	6.36509	4.05832	4.44368	3.86937
chr1	87734604	87735041	0.520142	3.81477	2.25831	2.47764	2.63666
chr1	87738761	87739325	0.175205	7.7936	5.39882	3.12947	3.89757
chr1	87749855	87750410	0.018039	10.2868	6.97251	4.20615	4.52831
chr1	87792034	87792478	0.745124	5.04652	2.93114	2.68232	2.35342
chr1	87831790	87832617	0.624749	14.4877	8.93083	7.55058	6.9072
chr1	87849833	87850186	0.973035	4.0479	2.22953	2.57039	1.59453
chr1	87904292	87905014	0.186913	18.2865	14.7506	9.98835	12.7336
chr1	87955832	87956519	0.238633	9.71033	5.68872	5.12379	4.48558
chr1	88075383	88075848	0.292353	9.53195	4.89112	4.15527	3.82512
chr1	88110623	88111391	0.00613587	10.3345	6.80108	3.85147	3.72322
chr1	88198250	88198829	8.59676e-06	9.77812	7.29828	1.77496	2.81071
chr1	88210148	88210705	0.0111545	4.77129	3.01573	1.43092	0.465734
chr1	88235889	88236479	0.268644	16.1743	11.3024	10.3796	11.4431
chr1	88268528	88268938	0.156881	9.77361	4.69794	2.91406	3.88524
chr1	88277596	88277991	0.0452015	4.28881	3.61301	1.44058	1.04084
chr1	88285835	88286286	0.0581873	5.89936	2.8368	1.27553	1.02661
chr1	88312436	88313267	0.181281	6.35863	5.01179	4.6474	4.57072
chr1	88326425	88326940	0.66787	9.94886	6.07685	4.52632	6.2326
chr1	88331136	88331448	0.0554356	3.2337	3.05416	4.36386	3.91531
chr1	88335083	88335411	0.224675	3.77031	3.13134	2.07274	2.03185
chr1	88336952	88337565	0.00627725	21.3379	19.3558	16.455	21.1945
chr1	88367878	88368400	5.66618e-06	6.35536	3.78403	0.439787	0.695778
chr1	88383747	88384231	0.140165	2.57177	2.63565	3.75432	2.61097
chr1	88396414	88396887	0.212357	10.2705	4.95691	3.24502	3.57256
chr1	88398125	88398649	0.315961	9.03439	5.98018	4.87335	6.91823
chr1	88400507	88401327	0.0392397	9.35838	5.48503	4.23573	5.20623
chr1	88405913	88406410	0.178272	12.4679	9.4455	6.05114	4.27293
chr1	88416867	88417369	0.000921663	8.5984	5.56324	2.4959	1.912
chr1	88421564	88421868	0.26403	2.02898	2.28463	1.13948	0.620479
chr1	88422446	88422843	0.453774	1.95223	1.592	0.297853	1.24078
chr1	88423046	88423970	0.374114	2.2702	1.37767	0.934382	1.98309
chr1	88424562	88425549	0.525469	3.96971	1.82959	1.79372	2.29644
chr1	88428710	88429342	0.00394392	8.43803	4.84134	6.81918	6.43609
chr1	88495097	88495525	0.433116	5.76686	2.76422	3.71296	3.41933
chr1	88515011	88515573	0.363859	11.4535	8.47289	5.75567	5.40897
chr1	88546671	88547457	0.827348	12.6459	9.24551	6.7118	7.49842
chr1	88565955	88567327	0.000366728	9.10555	6.08494	3.48555	3.65947
chr1	88595276	88595742	0.033257	6.55502	2.9115	1.9571	1.24827
chr1	88596342	88596720	0.00151655	4.79687	2.08246	0.163067	0.41126
chr1	88599926	88601083	0.0424931	6.27627	5.48591	3.05729	2.19326
chr1	88869285	88869643	0.069088	2.69294	2.10603	0.793115	0.382704
chr1	88937515	88938255	0.0177066	10.9366	7.08793	3.76182	3.38288
chr1	88938416	88939126	0.775647	17.5255	13.8206	10.2296	11.1675
chr1	88948049	88948277	0.0209777	3.22482	0.872871	3.97344	3.94074
chr1	88995129	88995574	0.199229	5.01052	3.91473	2.29916	1.12395
chr1	89070599	89071383	0.0881276	12.9636	7.1727	5.06765	5.29389
chr1	89081311	89081836	0.804216	6.53349	7.66003	3.89704	8.34535
chr1	89083475	89084062	0.494237	14.1589	9.53817	8.4043	11.0215
chr1	89114623	89114997	0.660809	4.45565	3.28027	2.43184	3.01048
chr1	89142630	89143294	0.79427	16.0143	10.4118	9.48209	10.5215
chr1	89189306	89189830	2.35679e-06	8.66505	6.69346	1.52086	1.87445
chr1	89223628	89224481	0.894116	4.27536	2.55516	2.3445	2.51753
chr1	89343999	89344597	0.847751	12.7556	7.86474	5.69732	8.5249
chr1	89346032	89346305	0.0668658	1.85201	3.01599	2.08569	2.53432
chr1	89364859	89365316	0.152413	6.3175	2.41151	3.23228	4.55697
chr1	89438165	89438655	0.370587	9.3547	6.85448	6.3603	6.06618
chr1	89447602	89448049	3.68264e-05	0.448176	1.76173	5.0754	4.45978
chr1	89464985	89465376	0.358037	4.24838	2.41044	1.3131	2.38726
chr1	89469955	89470661	0.241459	2.90601	2.13322	2.25871	2.4424
chr1	89471106	89471939	1.03414e-06	2.88891	1.7724	3.47719	4.46185
chr1	89504843	89505606	0.265823	11.4174	6.84043	5.65522	7.25254
chr1	89617988	89618307	0.859964	3.2704	1.52825	1.77639	2.23987
chr1	89652169	89653231	0.413549	9.06879	5.27234	5.99383	7.65453
chr1	89662784	89663264	0.0582736	6.83597	3.96006	2.73223	2.26959
chr1	89721868	89722295	0.649375	5.33693	2.48458	1.60039	2.75049
chr1	89745166	89745624	0.0133694	3.79003	1.6954	3.09941	3.51141
chr1	89749838	89751242	0.817077	3.9641	3.74326	2.8797	3.34619
chr1	89787524	89787907	0.0155629	4.82752	3.12723	0.75202	1.16029
chr1	89797358	89797906	0.0266654	3.8175	2.69968	5.07374	3.80162
chr1	89816568	89816999	0.979994	2.87137	2.05008	1.32756	1.01412
chr1	89819116	89819720	0.140998	13.7883	10.1268	5.17855	5.83741
chr1	89833041	89833489	0.653896	6.78716	6.43112	5.31235	5.23574
chr1	89904562	89905391	0.526317	4.71047	4.09011	2.27191	2.61726
chr1	89967137	89967514	0.493888	2.36112	2.82366	1.9622	0.176607
chr1	90040558	90041199	0.566	6.07057	2.73067	2.30432	3.71375
chr1	90041981	90042234	0.878806	3.35679	3.39965	2.01059	3.61154
chr1	90046599	90046974	0.358201	2.47243	2.29657	1.35822	1.41246
chr1	90092288	90092724	0.0187035	3.01474	2.24719	1.17094	0.535359
chr1	90108234	90108638	0.807398	2.68928	2.71736	1.97399	0.861703
chr1	90173726	90174622	0.778882	13.7121	10.8624	9.7667	11.2819
chr1	90184034	90184631	0.0342445	21.2282	13.2456	9.79043	8.4335
chr1	90186496	90186971	0.165136	11.8365	9.42232	6.4564	5.13347
chr1	90198204	90198560	0.0439566	5.33902	3.13364	2.2394	1.51852
chr1	90242109	90242540	0.376907	3.57488	1.97326	2.37133	1.95995
chr1	90253933	90254470	0.134642	11.1115	5.96638	7.07407	7.30335
chr1	90321113	90321970	0.306867	15.4269	9.31376	10.2024	11.5741
chr1	90324861	90325320	6.5488e-05	2.69958	2.6827	3.8394	5.1345
chr1	90330626	90331138	0.705816	8.20293	4.96352	3.88321	3.67742
chr1	90333734	90334088	0.0191982	1.11954	1.23072	2.72299	2.54205
chr1	90341976	90342417	0.00198275	9.07879	7.45528	2.95728	3.89864
chr1	90351416	90351739	0.243813	2.6358	2.25308	1.60743	2.00524
chr1	90353265	90353672	0.242673	5.88842	4.55048	2.79641	2.73046
chr1	90362292	90362664	0.460012	3.62418	3.31899	1.22787	1.6028
chr1	90370387	90372890	0.772357	7.86016	5.1728	4.9757	6.0941
chr1	90430657	90431150	0.00154766	2.28829	1.68725	2.98854	3.50334
chr1	90455441	90456669	0.153151	7.6145	5.08414	5.36317	5.0917
chr1	90458703	90459434	0.00696579	15.0126	10.1733	5.97858	5.73297
chr1	90461487	90461754	0.000516586	0.903134	0.150398	2.76003	2.64667
chr1	90535946	90537000	8.72579e-09	5.00678	3.81767	7.00262	6.83261
chr1	90543248	90543631	0.00128592	2.03416	0.230465	3.25882	3.08506
chr1	90559314	90559941	0.279939	5.42196	2.59028	3.17534	4.441
chr1	90594927	90596592	0.821777	3.18954	2.7604	1.84772	2.34272
chr1	90596798	90597300	0.636459	3.38195	3.94232	3.04989	3.13789
chr1	90597535	90599268	0.465515	8.70641	8.52909	6.49334	9.53071
chr1	90601632	90602908	0.00772798	17.0397	12.6845	12.3687	14.7796
chr1	90641729	90642411	0.418017	10.621	8.22191	5.74434	7.19369
chr1	90646740	90647132	0.883918	4.73797	4.57339	2.17865	2.85364
chr1	90648743	90649565	0.825845	10.639	7.29174	5.72874	6.46645
chr1	90653175	90653709	0.0102784	6.14855	4.03142	1.60417	1.88788
chr1	90660209	90661465	0.520003	5.26886	4.57871	2.22242	3.34138
chr1	90825805	90826491	0.0583377	3.31889	1.56973	2.40559	2.87573
chr1	90831016	90831603	0.0100289	2.30369	2.14304	0.489394	0.195643
chr1	90851258	90851843	0.418862	6.03117	3.70486	2.61791	2.69344
chr1	90922516	90923146	1.53514e-05	7.03944	5.75061	1.09354	0.735385
chr1	90965405	90965638	0.0254558	2.4977	0.85422	3.88421	3.88838
chr1	90965882	90968206	0.570901	9.0621	8.90411	5.36009	7.48813
chr1	91001041	91001239	0.000469855	2.16993	0.817879	3.42171	4.12447
chr1	91005212	91005757	0.00313944	2.98968	1.89988	3.23096	3.20353
chr1	91020662	91021009	6.59269e-05	2.66741	1.89564	2.46037	3.63885
chr1	91023781	91024076	0.0118107	3.81433	3.26694	0.400492	1.17902
chr1	91049389	91049639	0.00359352	3.25994	1.07651	4.0894	4.27569
chr1	91087792	91088636	0.0025608	15.4803	9.38693	11.4937	11.5194
chr1	91092644	91093241	0.327372	13.2207	11.8518	11.2985	11.0918
chr1	91103819	91104262	0.96367	6.00565	1.91105	2.68608	2.26676
chr1	91131774	91132418	0.00823412	12.0868	7.91873	10.6574	10.3122
chr1	91219625	91220226	0.0249293	11.3465	6.68643	4.81892	4.32438
chr1	91239398	91239775	0.109329	3.58716	3.61787	1.06419	1.81734
chr1	91241059	91241657	7.78425e-05	11.3437	8.36593	3.13116	2.46134
chr1	91350387	91350984	0.344011	2.14329	2.32388	1.90961	2.25415
chr1	91351069	91354149	0.483145	5.40795	4.39559	4.09912	4.70209
chr1	91359713	91360154	0.0252301	4.20649	3.14407	4.63307	3.73884
chr1	91363909	91364585	0.753081	1.88912	2.37595	1.51915	1.34927
chr1	91420263	91421507	0.39054	12.2122	9.42584	8.62624	9.37245
chr1	91422309	91423020	0.0035285	14.8548	10.1773	9.72856	12.9098
chr1	91451580	91452371	8.72143e-08	3.34598	2.2684	4.88212	5.77693
chr1	91463091	91463481	0.00363068	4.0447	1.65887	4.36406	3.50469
chr1	91466976	91467630	0.767324	5.20896	2.49438	2.10232	3.36749
chr1	91473662	91473927	0.0399057	3.92397	2.29883	3.21122	5.36114
chr1	91476515	91478448	0.759448	7.45693	6.4506	4.65192	7.12016
chr1	91502894	91503607	0.309355	9.69187	7.73439	7.08155	8.32225
chr1	91524193	91524668	0.299753	3.58823	2.76349	0.728006	2.34039
chr1	91540444	91540908	0.961344	2.26539	1.68884	1.22899	1.38951
chr1	91543062	91543685	0.327727	11.6297	7.79907	7.74405	7.47506
chr1	91553227	91553848	0.00111098	1.32214	0.720204	2.56249	1.88064
chr1	91564076	91564389	0.932759	2.97815	2.27705	1.64573	2.01026
chr1	91570341	91570545	0.184875	3.19985	2.63987	4.42875	3.06169
chr1	91839715	91840274	0.298732	13.9263	11.5698	7.80763	10.4784
chr1	91947939	91948398	0.956977	7.47091	4.35894	3.70945	5.39301
chr1	91957118	91957713	0.369333	12.2937	8.07266	5.25166	7.09717
chr1	92100268	92100980	0.00587482	7.25402	4.87096	5.73855	7.52134
chr1	92101714	92102360	0.145409	10.9676	8.92604	9.13823	12.186
chr1	92120978	92121311	8.52061e-05	0.349977	0.61027	2.89116	2.00143
chr1	92122202	92122482	1.68835e-05	2.75529	1.31861	4.25141	5.76223
chr1	92142086	92142415	9.631e-05	3.06712	1.14439	5.16155	4.65917
chr1	92185450	92186109	0	0.673028	0.470471	5.85395	5.72259
chr1	92484800	92485389	0.0108939	15.0339	12.6847	12.7123	14.9307
chr1	92489349	92489845	0.143182	12.7282	10.4564	9.71273	10.9173
chr1	92547142	92547883	0.901395	11.3834	5.92952	5.7396	5.95615
chr1	92736764	92737296	0.118258	13.6875	12.1144	7.67463	6.18031
chr1	92802864	92803487	0.0728672	13.2363	8.28018	7.37383	8.9929
chr1	92806228	92806430	0.00384381	1.54457	-0.25682	2.80022	2.10381
chr1	92806513	92806790	0.0246688	3.08184	3.57224	5.11374	2.52466
chr1	92811391	92811857	0.186191	3.81051	1.89644	2.08294	2.56036
chr1	92825050	92825567	0.0604606	8.7848	5.96796	4.71817	2.73864
chr1	92853081	92853702	0.0392146	10.9198	7.40118	4.94579	4.90165
chr1	92869683	92870422	0.226787	19.2267	15.253	12.9	15.5277
chr1	92894852	92896198	0.609854	3.87751	2.25868	1.36305	2.72097
chr1	92919829	92920039	0.0166923	2.22249	0.718936	2.43472	2.41106
chr1	92934539	92935010	0.00173435	11.5231	8.63849	5.30892	5.07468
chr1	92949190	92949756	0.368084	3.43194	2.33252	2.51797	3.37292
chr1	92950083	92950756	0.0196068	2.55045	2.65498	2.87443	3.34994
chr1	92995246	92995965	0.952635	13.3872	10.9815	8.04285	9.55801
chr1	93075519	93076204	0.220888	21.2514	19.1013	16.0499	17.151
chr1	93076415	93076765	0.580311	2.9698	2.67171	1.46649	2.25346
chr1	93077237	93077761	0.714848	3.46026	1.57406	1.85282	0.806091
chr1	93107570	93108175	0.341793	11.6392	7.72564	5.90407	5.38074
chr1	93135677	93136070	0.589907	3.33678	3.17017	2.16798	2.39406
chr1	93137220	93137746	2.66409e-11	1.29433	0.877052	6.4661	5.45442
chr1	93146191	93147653	0.00395928	5.16428	4.40759	4.82186	5.68352
chr1	93148519	93148993	0.07141	5.38499	3.52608	1.08579	2.25936
chr1	93194290	93195267	0.217619	3.88093	3.13754	1.75921	2.08436
chr1	93243420	93243994	0.546066	11.3412	6.64592	6.12545	5.40597
chr1	93262769	93263301	0.0475535	4.56937	2.13444	2.56833	3.61604
chr1	93276963	93277524	0.382409	8.0383	5.6652	4.24961	4.05732
chr1	93294863	93295760	0.150157	3.02146	1.87745	2.16756	2.60094
chr1	93308998	93310976	0.983414	3.21042	1.83678	1.84835	2.12219
chr1	93325098	93325746	0.291675	19.9584	18.9742	16.7994	17.5391
chr1	93332795	93333180	0.00805921	1.43935	2.0918	2.64868	2.85752
chr1	93333419	93333628	0.00421066	2.78315	0.263389	3.25693	2.88235
chr1	93339077	93339628	0.212996	3.7793	2.02089	1.54927	0.733191
chr1	93342595	93343096	0.035253	4.55569	2.0664	3.40111	4.73461
chr1	93344154	93344459	0.488888	1.54149	1.82796	0.384097	1.00706
chr1	93352383	93353470	0.276361	3.91578	3.15072	2.98672	2.91481
chr1	93354698	93356761	0.486558	7.73082	5.29906	5.37563	5.87999
chr1	93357016	93357621	0.300371	4.3707	2.31019	2.53652	3.8424
chr1	93361780	93362191	0.594606	4.51947	3.0758	2.34381	4.55216
chr1	93379679	93380430	0.811002	11.5502	6.77204	4.91544	6.66204
chr1	93386676	93387363	0.00403093	6.3563	5.3006	5.45075	6.40197
chr1	93390916	93391635	0.0797545	3.91549	3.84045	3.00884	4.5234
chr1	93420306	93420811	0.502184	12.2762	11.4352	7.86186	11.9341
chr1	93437183	93437812	0.0255683	2.55177	1.28669	1.90108	2.8412
chr1	93460581	93460945	0.727474	4.34789	2.4264	1.88217	1.5971
chr1	93470641	93471355	0.341451	16.2831	10.4671	10.1639	11.3701
chr1	93497151	93497844	0.0994222	7.89847	5.29802	6.14095	5.70977
chr1	93639518	93639757	0.0239764	2.12584	2.53145	3.5591	3.32674
chr1	93651684	93652126	0.27103	10.8091	7.97348	7.55952	7.17622
chr1	93697358	93697828	0.376527	2.9577	3.49394	3.01615	3.6586
chr1	93698022	93698695	0.331791	4.65405	6.07648	3.71332	4.94797
chr1	93713271	93713771	0.0575376	3.4778	3.52126	3.07418	6.43407
chr1	93718909	93719450	0.00402215	9.12401	6.6468	11.3143	9.74365
chr1	93719929	93720617	2.81592e-05	8.18931	5.76647	9.15474	13.1465
chr1	93768787	93769620	5.41789e-14	1.22351	0.994676	4.15878	4.91603
chr1	93770889	93771793	0.263502	9.12036	4.7018	5.40113	6.38933
chr1	93779682	93780153	0.000343768	2.14438	1.41272	4.45667	4.23301
chr1	93810399	93810888	0.0027657	7.72075	4.19042	2.09064	2.02355
chr1	93852775	93853258	0.12839	4.16538	3.11609	2.59806	3.25306
chr1	93858622	93859317	0.404894	11.5884	7.75392	5.5497	6.06162
chr1	93865361	93866113	0.00348048	8.10874	6.12305	7.46968	7.17603
chr1	93877960	93878279	0.523576	3.14147	2.9651	1.59591	2.41403
chr1	93887460	93887799	0.868567	2.28931	2.17959	1.18312	1.73645
chr1	93912355	93913343	0.584175	3.37891	2.04901	2.24374	2.7374
chr1	93948349	93948672	0.11056	3.8115	2.89436	1.0508	1.93718
chr1	94074871	94075517	0.0192343	4.48481	3.29936	1.41262	2.09495
chr1	94075651	94077859	0.755877	4.27438	5.05709	2.58293	4.06999
chr1	94092357	94092641	0.00352668	2.45606	1.71593	4.39084	3.14027
chr1	94256713	94257295	5.45803e-06	6.35704	3.68729	1.18011	1.06993
chr1	94301695	94302060	0.113827	4.42618	2.69389	0.168859	1.61309
chr1	94350097	94350766	0.565986	8.24503	4.67419	3.06249	3.9353
chr1	94417871	94418510	0.414105	8.98605	5.51914	3.64302	3.71371
chr1	94507343	94508052	0.811398	11.7357	8.92739	6.9616	7.21312
chr1	94511098	94511565	0.364702	7.08755	3.59567	2.07632	3.70561
chr1	94544238	94544777	0.867366	8.43199	4.96259	4.53344	4.36004
chr1	94545253	94545819	0.068723	15.0277	12.7353	7.3145	8.02363
chr1	94593185	94594038	0.24017	10.6135	6.5756	5.58605	5.05322
chr1	94641438	94641687	0.000372341	1.10567	0.221247	3.18572	2.25786
chr1	94730367	94731089	0.0416286	18.8628	13.2743	10.0584	9.32296
chr1	94791570	94792067	0.00296594	8.22081	5.03847	2.62677	1.60325
chr1	94807044	94807741	0.916518	4.75803	5.70341	3.11237	3.70272
chr1	94807826	94808330	0.491889	2.31197	0.769728	1.47274	1.24995
chr1	94831209	94831585	0.60533	3.50184	2.15219	2.1206	1.95022
chr1	94853194	94853674	0.358257	5.86103	2.3422	3.78133	3.46667
chr1	94910970	94911499	0.135274	8.3913	6.83904	3.75293	3.14616
chr1	94977421	94977967	0.0784152	8.81685	7.18974	2.18769	4.96296
chr1	95025193	95025843	0.773478	13.866	11.234	9.86189	8.73392
chr1	95031492	95031958	0.101571	4.14326	3.26166	1.22806	1.55842
chr1	95049595	95049851	0.465461	3.15172	2.48077	1.54947	1.09818
chr1	95057033	95057718	0.0119946	2.99898	1.80927	2.41057	3.99514
chr1	95058632	95058885	0.00274533	3.51922	1.02024	4.03313	6.75491
chr1	95062999	95063551	2.10942e-14	0.803252	0.910088	4.83731	7.31327
chr1	95070276	95070546	4.99617e-05	3.01428	1.13407	3.57821	4.1383
chr1	95070700	95071746	0.0239889	12.8641	9.11596	8.35296	10.5101
chr1	95073062	95073700	4.00058e-05	3.63276	2.32561	3.92146	5.0329
chr1	95120545	95120983	0.828527	3.95957	2.62566	2.20657	1.47181
chr1	95132290	95133378	0.679841	3.69498	1.9566	1.42916	2.58455
chr1	95134718	95135113	0.723718	3.61163	2.54568	2.00863	2.17576
chr1	95202035	95202768	0.651657	6.84414	5.71108	5.50396	4.49275
chr1	95223089	95223520	0.0462316	3.21516	2.61699	2.50737	3.15482
chr1	95239032	95240732	0.384669	7.94963	4.80432	4.48554	4.42749
chr1	95341001	95341747	0.526571	7.03431	4.51495	4.33794	4.33517
chr1	95341824	95342673	0.121426	2.87498	2.15356	1.75234	2.37651
chr1	95374482	95375041	0.998555	3.46501	2.36872	2.55306	1.57795
chr1	95375417	95376068	0.337812	2.80313	2.14233	1.31786	1.31553
chr1	95403646	95403975	0.639211	4.56732	4.51517	3.44512	4.34399
chr1	95407890	95409274	0.938036	2.98671	3.08827	1.52758	2.80727
chr1	95531329	95532523	0.787397	4.51112	3.64675	3.3866	3.16034
chr1	95565202	95565582	0.419068	6.59445	4.50384	3.43076	3.76251
chr1	95582824	95583421	0.000169711	9.16185	8.12625	3.14655	3.44028
chr1	95623384	95624004	0.149787	9.88991	7.07852	4.3011	3.4506
chr1	95650451	95652010	0.303055	2.64109	1.52692	1.43415	1.95896
chr1	95698203	95698707	0.253071	3.5374	2.14955	2.15293	2.63976
chr1	95700041	95700633	0.509882	12.2353	6.15642	7.2911	8.32921
chr1	95931548	95931922	0.0283737	3.19046	2.75775	0.613356	0.326637
chr1	95975382	95976202	0.473383	20.2343	19.5911	13.5576	15.5022
chr1	96035908	96036509	1.37296e-07	17.4138	15.819	4.63209	6.39721
chr1	96037501	96037817	0.0066242	4.01714	3.56637	0.373961	0.491696
chr1	97209948	97211138	0.268505	5.55506	4.46229	3.2525	3.10865
chr1	97658719	97659387	0.270074	9.59144	6.49272	4.59076	4.17997
chr1	98743298	98743703	0.107411	6.38146	3.30416	2.52319	1.13412
chr1	98915525	98915964	0.000128912	5.09761	1.8189	-0.244127	0.117853
chr1	98935109	98935772	0.00570418	4.54395	1.76332	0.688226	1.12972
chr1	99393464	99393897	0.233677	5.32651	5.24443	1.58293	2.78938
chr1	99557220	99559044	0.144418	5.01025	5.60905	2.37964	3.60769
chr1	99585168	99585823	3.34436e-06	12.3977	9.50448	3.2993	3.80985
chr1	99656452	99656714	0.000912094	2.21706	2.18388	3.89896	3.74178
chr1	99665752	99667512	0.702347	3.22208	1.88068	1.47126	2.03677
chr1	99699061	99699535	0.0684997	8.88234	5.54692	5.74471	8.35796
chr1	99705946	99706583	0.570297	11.9866	7.31961	5.34746	7.18304
chr1	99768764	99769479	0.788659	3.58013	2.26642	1.51565	2.21981
chr1	99815017	99815527	0.355666	4.24132	3.09677	4.11852	2.10019
chr1	99873194	99874087	0.717745	16.7423	14.263	11.1278	13.5673
chr1	99879775	99880144	1.14642e-05	1.26742	0.670485	3.68612	3.61339
chr1	99944194	99944539	3.1371e-07	1.81639	0.287749	2.97243	5.70991
chr1	99991207	99992738	0.780899	7.22966	5.35182	4.49621	5.28202
chr1	99993036	99993573	0.432822	3.59648	1.84588	3.17541	1.53224
chr1	100036151	100036375	0.0883008	5.84306	3.40946	3.78738	4.90223
chr1	100043933	100044346	0.249366	2.25546	2.04953	2.20764	1.87455
chr1	100075633	100076086	0.00153169	10.0262	6.62132	3.89014	2.2247
chr1	100246598	100247375	0.374254	10.4642	6.11719	4.89574	6.2628
chr1	100288497	100289074	0.0286888	13.2119	10.3442	5.90081	7.60745
chr1	100420083	100420492	0.221819	4.14907	2.01557	1.53472	0.733437
chr1	101670734	101671229	0.931014	11.6781	9.69227	6.18382	5.79533
chr1	101997555	101997939	0.0989935	2.23248	2.76208	0.171037	0.327438
chr1	102117015	102117413	0.031436	4.08424	2.90672	-0.129535	1.35868
chr1	102128501	102128982	0.48393	10.7933	8.56743	5.30391	6.56466
chr1	105659305	105659709	0.0030963	5.91165	3.11138	0.287709	1.49455
chr1	105681220	105681700	0.0184699	7.40206	4.20644	2.13397	1.7293
chr1	105692989	105693370	0.0273287	3.6468	2.03715	0.30768	0.680313
chr1	105695849	105696336	0.0055846	8.06801	4.20759	1.51782	2.52652
chr1	105883476	105883894	0.000109875	6.36398	3.06023	0.819798	0.868477
chr1	106028267	106028653	0.0603565	3.49663	2.60488	0.88497	1.33381
chr1	106841227	106841757	0.00014134	5.5992	3.75527	0.967467	1.32176
chr1	106875565	106876103	6.80731e-05	8.30987	4.20816	1.48699	1.0677
chr1	106882686	106883415	0.116795	18.0132	13.8115	11.5194	11.1311
chr1	106925762	106926121	0.205898	4.28985	2.63565	0.948533	1.58866
chr1	106988986	106989736	0.00255042	14.186	9.5204	4.99485	4.89068
chr1	107075105	107076400	0.270583	7.19008	5.33336	3.56051	3.88264
chr1	107252557	107253567	2.35634e-06	10.0698	8.70053	3.8917	4.44448
chr1	107259254	107259716	0.0957387	5.4414	5.07468	2.58023	1.72444
chr1	107342099	107342549	0.00293866	2.23813	2.71171	0.38418	0.0574893
chr1	107342723	107343157	0.166388	2.76937	2.75152	1.17865	1.74158
chr1	107526978	107527491	0.355046	8.94949	4.87396	2.99643	3.17162
chr1	107556535	107557058	0.939011	9.56864	5.82877	5.53238	6.01004
chr1	107577102	107577625	0.000628376	14.0695	8.73562	3.79976	3.89086
chr1	107763296	107763989	0.389292	6.89977	4.60361	4.10126	4.35576
chr1	107787629	107788243	0.00853878	14.6777	11.7349	10.8082	11.0508
chr1	107802894	107803336	0.0210737	2.90252	2.77675	3.21364	5.03822
chr1	107822155	107822883	0.93939	3.6672	1.76866	1.72213	1.45171
chr1	107874383	107874621	0.00645966	2.29009	1.28591	3.09492	3.37183
chr1	107885905	107888965	0.296915	4.42795	4.21706	2.64588	2.91281
chr1	107890308	107890846	0.399023	4.3093	4.02934	2.9646	3.45856
chr1	107897341	107897659	0.297969	2.56503	2.20668	2.67452	2.22353
chr1	107904252	107904516	0.00243362	2.18994	1.53834	2.79509	2.46632
chr1	107933299	107934003	0.449836	5.86361	2.82285	3.31145	3.47657
chr1	107967795	107968414	0.963699	17.9729	15.3534	14.6598	13.4295
chr1	108048333	108048720	0.0763211	6.06788	3.71602	1.9038	2.46949
chr1	108065539	108065752	0.0207473	4.34409	1.33275	3.19605	3.95653
chr1	108067600	108070251	0.777885	8.09044	7.79997	5.10685	7.43025
chr1	108138790	108139026	0.000959817	4.09079	2.87682	5.28012	5.60972
chr1	108243304	108243764	0.170137	7.11761	5.47541	3.08158	3.31904
chr1	108286268	108286784	0.999653	8.07563	6.68857	4.50582	5.7467
chr1	108291910	108292579	0.00914033	18.4748	13.8091	12.9669	14.2013
chr1	108321667	108322591	0.334567	16.5603	11.8932	11.0529	10.9848
chr1	108346327	108346709	1.08981e-05	0.542199	0.443545	4.01075	2.69548
chr1	108374191	108374916	0.188938	3.58386	2.5671	2.51363	2.30171
chr1	108408076	108408674	0.805649	15.8435	10.2968	7.39739	9.77124
chr1	108439228	108439674	0.486189	5.52232	4.06328	1.78625	3.49766
chr1	108441259	108441988	0.0409418	3.97489	2.46211	1.17566	1.38358
chr1	108487966	108488333	0.000509713	2.94472	2.21554	2.93518	3.50183
chr1	108525383	108525748	0.246879	7.19913	4.31286	3.72917	6.2708
chr1	108525988	108527314	0.612733	4.11005	3.3459	2.10594	3.12312
chr1	108608842	108609299	0.372603	3.54609	2.22522	1.49556	1.727
chr1	108609946	108610858	0.0135586	6.21927	6.91388	2.75457	3.60767
chr1	108610996	108611378	0.660993	4.67138	7.17017	2.69585	6.08895
chr1	108613603	108614304	0.326929	16.0538	10.3222	8.66188	8.70777
chr1	108632098	108632645	0.166529	9.72425	6.99355	4.46172	5.13011
chr1	108655584	108656567	0.239059	2.21234	1.73585	1.45604	1.61129
chr1	108714910	108715428	0.253928	7.82459	5.56985	4.49431	4.75122
chr1	108780324	108780916	0.0412222	9.50811	6.48149	3.36446	3.30645
chr1	108798040	108798465	0.00563509	7.07291	6.85624	2.53556	2.45838
chr1	109377910	109378599	0.00635511	9.11815	5.41461	2.88708	4.20349
chr1	109458669	109459038	0.0536555	3.66844	2.68401	1.39665	0.662102
chr1	109494942	109495507	0.767974	9.75515	6.85628	5.83077	6.62033
chr1	109532373	109533405	0.534737	8.81963	6.20021	4.68183	5.88872
chr1	109610365	109611709	5.84306e-05	9.01598	5.83922	2.41602	2.42965
chr1	109669610	109669996	0.60223	2.01128	2.66205	0.887585	1.68882
chr1	109811754	109812483	0.129584	2.87474	1.73053	1.6365	2.61489
chr1	110069427	110070029	0.00470972	4.75733	2.095	0.290695	0.818958
chr1	110273319	110273684	0.000704673	2.65647	1.92331	-0.448523	-0.517889
chr1	110723701	110724266	2.81806e-09	15.2049	11.1722	1.61656	2.04038
chr1	111731107	111731548	0.000350917	7.68181	4.4864	0.916963	1.39439
chr1	112385832	112386370	0.00212426	16.2421	12.1862	5.1735	8.04068
chr1	113138875	113139327	0.215534	6.31741	2.98576	2.76021	1.67238
chr1	113530657	113531056	0.00950287	6.86912	4.85479	1.56297	2.6368
chr1	113556792	113557317	0.00967098	14.0003	9.4008	4.97196	7.08865
chr1	113760447	113761839	0.00335759	11.6344	8.50152	5.14636	5.44388
chr1	114015198	114015641	0.0407991	2.88049	2.97154	3.58297	3.55486
chr1	114141981	114142439	0.922252	3.37658	2.89853	1.50112	1.76349
chr1	114275035	114275766	0.00408557	11.7455	6.902	3.42877	4.35275
chr1	114276218	114277042	0.177581	20.1795	16.0812	10.6695	10.6463
chr1	114285347	114285817	0.00428569	6.73	3.28093	1.33596	1.35599
chr1	114348199	114348774	0.0105458	5.70373	3.10118	1.49174	1.9082
chr1	114600497	114600989	0.00705707	10.4102	5.65364	2.89387	2.71913
chr1	114651454	114652086	1.19372e-06	10.4889	8.81269	1.71438	3.04478
chr1	114844014	114845088	0.000153231	4.49914	3.80614	1.38181	1.36788
chr1	115143863	115144403	0.00205926	4.92631	2.79507	0.846569	0.301883
chr1	115362422	115362729	0.118002	2.88434	2.41884	1.10539	1.4108
chr1	117543493	117543926	0.0621736	5.43108	3.37313	2.23199	1.37752
chr1	117582942	117583773	0.000422847	9.14539	5.26533	2.47227	2.31186
chr1	117886809	117887333	0.244655	3.84008	3.23992	2.59591	1.27329
chr1	118023620	118023988	0.00490112	4.84116	2.9418	0.933623	0.835122
chr1	118029026	118029438	0.00460726	5.25773	2.62839	0.156992	0.673986
chr1	118209665	118210334	0.00255536	18.2491	14.6333	6.44562	7.28345
chr1	118374115	118374726	3.63471e-05	9.77693	6.34094	1.77321	1.57146
chr1	119019508	119019974	0.023221	3.06843	2.41241	0.253845	0.95407
chr1	119415911	119416583	0.0037689	11.0057	5.89298	3.30478	3.60866
chr1	120171555	120172140	0.00444788	8.11038	5.2431	2.4346	1.87564
chr1	120207642	120207927	0.516232	1.76949	2.34526	-0.173639	0.999326
chr1	120217182	120217680	0.471159	3.96024	2.61395	1.82956	1.95719
chr1	120218144	120218588	0.154264	6.5237	4.38872	3.06713	6.24252
chr1	120264502	120264997	0.885191	9.49052	4.81986	5.2788	5.4282
chr1	120285190	120285625	0.592152	2.06912	2.07298	1.96146	1.70341
chr1	120285862	120286828	0.594395	2.93244	1.65118	1.36847	1.55886
chr1	120355275	120355897	0.16168	8.37259	6.10979	6.29432	6.12799
chr1	120355980	120356372	0.437831	2.48097	1.9701	2.60923	2.01264
chr1	120373418	120373866	0.455946	7.22515	5.64638	3.92445	4.46644
chr1	120389403	120389804	0.8412	4.7311	2.94007	1.8677	2.64147
chr1	120394846	120395273	0.0460951	6.69285	4.78823	5.31493	6.00443
chr1	120461156	120461583	0.240944	5.59718	3.08263	1.875	1.44
chr1	120524113	120525083	0.680264	7.29238	4.85089	4.74911	3.31575
chr1	120557316	120558035	0.754059	3.38643	1.74468	1.97306	1.92394
chr1	120655960	120656631	0.0486003	12.8515	8.45054	6.69029	6.96862
chr1	120665366	120665984	0.102761	9.84854	8.41342	5.14656	5.12955
chr1	120950089	120950459	0.803008	4.17008	2.74704	2.60828	2.67261
chr1	120979148	120979550	0.604735	2.50129	2.40933	1.97123	2.27626
chr1	120980000	120980695	0.757233	7.98246	3.79694	4.81741	3.76175
chr1	120984021	120984627	0.663545	12.012	7.72464	6.55038	7.74579
chr1	120990195	120990936	0.967045	14.4896	11.8452	8.42163	10.3406
chr1	121142933	121143299	0.132598	3.05391	2.19144	1.24518	0.596866
chr1	121186749	121186997	0.495639	2.65652	4.28651	3.65022	3.26634
chr1	121205449	121205741	3.50787e-07	1.84455	0.695666	3.69341	3.19388
chr1	121241920	121242379	0.991362	4.02694	3.31986	2.10143	3.32625
chr1	121300960	121301602	0.125453	2.33762	1.74102	1.33001	2.65676
chr1	121301685	121301891	7.27261e-05	0.398621	-0.251858	2.47199	2.2964
chr1	121304167	121304689	0.0471372	7.08897	3.39429	4.45994	5.63803
chr1	121316063	121317687	0.615575	3.92757	4.38385	2.59957	4.84713
chr1	121317816	121319025	0.803326	5.58148	5.87563	4.2373	6.69997
chr1	121319165	121319697	0.916024	7.38168	4.80543	4.69754	4.3407
chr1	121319960	121320679	0.0376636	13.1751	9.18963	6.93951	8.14983
chr1	121354722	121355338	0.128699	9.57958	5.8747	4.15981	6.41605
chr1	121359992	121360356	0.140696	4.75479	2.8333	1.56016	1.67875
chr1	121380968	121381472	0.159473	6.73166	4.08786	2.59036	3.87555
chr1	121400476	121401736	0.0338335	4.30773	2.55621	4.02173	3.70467
chr1	121406106	121406467	0.000241502	2.48449	1.10435	5.65137	4.07278
chr1	121419251	121419672	0.000711371	2.84816	1.41347	3.77215	4.40898
chr1	121421483	121422139	0.438649	3.77604	2.10919	3.55184	3.59493
chr1	121422440	121423214	0.291958	2.84977	3.50063	1.49176	2.04081
chr1	121432677	121433111	0.000148049	1.802	0.919023	3.1423	3.46603
chr1	121445090	121445807	0.111405	11.9248	8.54403	8.69608	9.12431
chr1	121514820	121515226	0.151343	5.03113	3.45132	4.32943	5.04597
chr1	121538927	121539360	0.00189283	5.25681	2.95446	4.97763	6.04983
chr1	121544841	121545450	0.255534	2.7459	2.30797	1.78234	2.02708
chr1	121571453	121572086	0.7768	18.5521	14.4412	10.6569	9.92894
chr1	121715233	121715697	0.260712	8.1388	3.50675	2.08972	2.89888
chr1	121733449	121734532	0.219253	3.32636	2.8956	1.42735	1.81209
chr1	121791444	121792019	0.0490086	9.99406	5.37253	2.86916	2.34024
chr1	121809602	121809977	0.321285	3.18563	3.29251	1.81903	3.1507
chr1	121815851	121816306	4.33795e-07	4.90668	4.72288	0.135531	0.235936
chr1	121826209	121826784	0.518884	10.2471	7.59996	4.54388	6.69891
chr1	121835326	121835709	0.0341887	3.22312	2.49973	0.155674	1.07337
chr1	121862488	121862801	0.0274033	4.30516	3.78915	0.1936	1.28892
chr1	121893862	121894530	0.569458	2.6764	1.81629	1.36465	1.24334
chr1	121909636	121910127	0.0591557	8.07509	4.81407	1.50754	2.78523
chr1	121912766	121913254	0.104249	14.2891	8.47391	5.34196	6.38719
chr1	121921566	121922033	0.0157258	5.20695	3.7932	1.22327	1.77734
chr1	121929510	121930053	0.00526822	14.6772	9.23934	9.49385	11.8789
chr1	121969468	121970662	0.302707	2.54096	1.553	2.29024	1.61583
chr1	121989983	121990790	0.17746	14.5008	9.83141	8.36451	10.3417
chr1	121994865	121995454	0.110386	7.38644	4.99462	5.29478	5.85398
chr1	122016785	122017068	0.333776	3.54937	1.2129	2.20137	3.0338
chr1	122043499	122044085	0.0954237	12.686	9.48445	5.4185	5.14365
chr1	122050840	122051254	0.568498	5.23239	3.54472	2.61495	3.01547
chr1	122051800	122052319	0.271489	6.61682	4.47587	4.59868	5.6419
chr1	122068350	122068860	0.0201925	6.34313	4.16353	2.00671	2.68167
chr1	122093644	122094187	0.72938	16.8082	9.38893	9.30197	9.09314
chr1	122127841	122128422	0.0315601	7.7597	5.36871	3.52033	3.49031
chr1	122161503	122162172	0.000114508	4.91172	3.52334	4.5824	4.90545
chr1	122186294	122186880	0.672949	11.8145	9.08739	6.67689	6.77595
chr1	122224228	122224703	0.270377	7.21979	3.7062	2.3863	3.02724
chr1	122253924	122254496	0.907775	2.5032	2.9947	1.69584	1.67842
chr1	122445740	122446226	0.629188	12.8201	11.6688	8.74286	7.60308
chr1	122446662	122447112	0.534023	6.68999	3.02353	2.77694	2.93138
chr1	122482967	122483728	0.460292	9.58126	4.61063	4.62621	5.88742
chr1	122491051	122491761	0.824005	10.5722	7.82033	6.23354	6.2523
chr1	122525426	122525882	0.00177633	6.08156	6.23729	1.99549	2.04772
chr1	122551475	122552370	0.000157377	5.83078	4.645	6.85541	6.94246
chr1	122582323	122582908	0.103688	11.1987	9.76623	9.21109	9.22107
chr1	122950278	122950704	0.00101581	3.61996	2.36086	0.405774	0.626067
chr1	123076774	123077351	0.938899	8.48197	4.50786	4.90859	4.26005
chr1	123145522	123146246	0.752493	10.222	5.84845	5.56531	4.7331
chr1	123223668	123225077	0.523251	3.43117	3.18312	2.51017	2.59411
chr1	123257282	123257555	0.00224455	0.873314	0.76989	2.2854	2.2363
chr1	123296606	123297333	0.137646	21.886	17.6781	13.1809	15.9879
chr1	123337611	123338088	0.0892732	10.6592	7.3665	4.04249	5.10451
chr1	123386830	123387210	0.569433	5.27701	2.19802	1.64888	2.70963
chr1	123493471	123494078	0.000903683	7.94131	4.16329	1.77656	2.43716
chr1	123497770	123498057	0.0154229	3.10853	2.94621	0.408103	0.399437
chr1	124335936	124336403	0.0521587	6.03265	2.89007	0.627851	1.28508
chr1	125244875	125245337	0.0815442	9.26105	5.23507	2.94789	2.8715
chr1	125310669	125311158	2.50201e-05	6.6234	4.4097	1.51369	1.12156
chr1	125452959	125453396	0.000865911	3.09577	2.79219	0.656995	0.703562
chr1	125551857	125552319	0.00243776	3.93848	2.52882	3.9349	5.63872
chr1	125620382	125620877	0.00806575	0.723654	1.94963	2.75176	2.48577
chr1	125631425	125631667	0.00448908	1.47709	1.40132	2.81463	2.8883
chr1	125746761	125747157	0.16369	2.95132	2.27662	4.15262	3.10565
chr1	125861157	125861640	0.224476	5.28202	3.73637	1.89045	2.18656
chr1	125871139	125871638	0.0138584	6.34517	5.4481	2.16839	2.22806
chr1	125937950	125938740	0.97104	16.678	13.7022	10.7771	13.1837
chr1	125946709	125947217	0.12816	6.76252	4.40497	3.90776	6.40614
chr1	126194972	126195268	0.0225044	3.64404	2.8702	0.965495	0.0872986
chr1	126216039	126216647	0.526858	3.33753	2.06141	1.50408	2.28048
chr1	126238336	126238715	0.19569	2.85173	2.9065	0.75461	1.84699
chr1	126413929	126414708	0.000139174	9.55762	6.11063	2.33831	1.96622
chr1	126548728	126549300	4.15714e-07	9.56398	6.81802	1.10167	2.3525
chr1	126570940	126571353	0.0115174	5.13208	3.27655	0.961872	1.7313
chr1	126614690	126615134	0.00116777	7.62693	5.40596	1.66676	2.31993
chr1	127267348	127268083	0.207497	7.24782	5.26727	3.64143	4.78829
chr1	127269431	127269796	0.0367886	2.97209	1.52829	0.470638	1.0146
chr1	127330799	127331561	0.452026	3.5128	2.01498	1.20051	1.06087
chr1	127331701	127332896	0.552182	5.4594	5.22507	2.14514	3.63913
chr1	127378572	127379203	0.0320323	2.20423	1.91759	0.365539	0.793168
chr1	127385726	127386292	0.206693	4.23717	2.76445	1.41713	2.0105
chr1	127413539	127414328	0.923514	4.18653	1.93614	2.16762	2.35027
chr1	127415539	127416381	0.943789	21.9134	17.3114	13.2747	17.0756
chr1	127422649	127423098	0.0415731	1.94364	0.384566	3.53744	2.84716
chr1	127429818	127430136	0.778964	4.49634	2.96204	1.62945	4.02758
chr1	127456239	127458401	0.812615	5.16637	3.56047	2.16987	3.61216
chr1	127470743	127471249	0.32232	10.2014	4.94903	4.93445	5.54497
chr1	127504019	127504641	0.0351011	17.0189	12.2449	13.3027	14.8435
chr1	127565593	127566046	0.835597	5.87034	4.71063	3.879	3.79559
chr1	127566652	127567090	0.0578204	6.41863	4.40728	2.21348	2.08076
chr1	127573180	127574495	0.00958333	8.63051	6.5256	6.4292	7.45025
chr1	127575854	127576665	0.62043	3.95963	3.27691	2.25239	2.85365
chr1	127590851	127591457	0.548108	6.05359	3.95019	4.02804	3.67699
chr1	127598392	127598738	0.000168555	3.68569	1.99674	4.90868	5.82229
chr1	127686275	127686852	0.123544	10.471	8.26664	3.84095	4.671
chr1	128328117	128329031	0.460118	6.00278	3.43041	2.49053	2.67053
chr1	128489255	128489987	8.07902e-06	0.814249	0.737255	3.8789	2.50783
chr1	128518594	128519107	0.178148	4.74363	3.19397	1.88657	1.14862
chr1	128569799	128570189	1.00863e-05	2.07863	1.19415	3.35078	2.49779
chr1	128622906	128623478	0.00776224	6.79918	4.30176	2.29355	2.15797
chr1	128634514	128635071	0.790787	4.8477	3.67976	2.76922	2.50867
chr1	128713951	128714630	1.72828e-06	1.8909	1.24201	3.51069	3.36421
chr1	128828143	128828765	0.664197	13.3061	9.50196	7.93702	8.27399
chr1	128889814	128890232	0.0490581	6.08172	2.43234	1.76778	1.09893
chr1	128908398	128908922	0.000267756	8.89032	5.1751	1.2024	2.19973
chr1	129099770	129100343	0.245172	6.26026	4.8751	4.85276	4.22483
chr1	129101264	129102998	0.317528	5.81864	4.57129	4.46189	4.07104
chr1	129306114	129306532	0.112966	10.506	7.71369	4.48112	5.44203
chr1	129355272	129356000	0.248268	11.4336	9.45223	7.87266	10.0512
chr1	129383734	129384060	0.090739	2.83871	2.01738	0.359431	0.942386
chr1	129393281	129393720	0.295654	14.3708	10.2273	9.28987	12.4752
chr1	129396753	129397283	8.51657e-09	11.9831	7.95093	2.6944	2.8321
chr1	129598748	129599296	0.00123959	7.30182	3.92283	1.66109	1.52868
chr1	129661846	129662556	2.82988e-06	10.0983	6.09917	2.16477	2.30332
chr1	129723822	129724423	0.0115136	12.3197	7.43711	7.26459	8.85272
chr1	129872311	129872642	0.000337257	3.97649	0.992344	4.96259	4.60866
chr1	129999795	130000697	0.234953	5.02108	4.42002	4.0284	3.80011
chr1	130037469	130038081	0.538004	8.55852	4.21438	4.54567	3.78637
chr1	130265238	130265813	0.489307	9.25154	5.06392	4.34686	3.93283
chr1	130268718	130269154	0.303552	6.28752	3.89235	3.26008	2.77023
chr1	130312960	130314174	0.426424	4.59419	2.42736	2.1141	2.45119
chr1	130720586	130721243	0.229401	10.7968	5.94809	4.14856	3.3073
chr1	130729044	130729508	0.74795	8.96984	6.84698	3.9158	5.94197
chr1	130771751	130772398	0.0650913	8.80508	4.91942	3.33379	3.60485
chr1	130840307	130840594	0.666765	2.55462	2.62523	1.38972	0.928231
chr1	130951863	130952273	0.612091	3.47647	2.89487	1.66659	1.80702
chr1	131140732	131141379	0.000268299	7.67818	3.89531	2.02965	2.04572
chr1	131237205	131237465	0.233898	3.25621	3.59299	0.667728	0.995707
chr1	131283181	131283464	0.0012375	4.20791	1.73585	5.20194	3.34757
chr1	131387661	131388220	0.00706324	13.9803	8.43926	4.36972	5.51086
chr1	131723429	131723946	0.000475914	4.99372	3.45602	0.559435	0.752547
chr1	131962763	131963103	0.117744	3.76668	2.30296	1.16779	1.53559
chr1	132063853	132064308	0.0332116	6.77647	2.9176	1.37546	1.96267
chr1	132089084	132089645	0.00504198	4.67861	2.98725	0.919503	0.951354
chr1	132246667	132247323	0.00352736	13.8482	12.091	7.7823	8.75032
chr1	132268582	132269147	0.933327	8.38967	4.34799	4.31625	4.82269
chr1	132444475	132445157	0.330325	4.87058	7.0224	2.0028	4.60002
chr1	132472496	132472908	0.805881	5.3343	2.49446	2.20319	2.06816
chr1	132530540	132531008	0.312049	9.79058	5.6111	3.75925	3.23065
chr1	132588385	132589087	0.0305362	12.232	9.53322	5.8245	9.03877
chr1	132611876	132612997	0.508457	3.4478	2.87709	2.13941	2.98533
chr1	132613199	132614668	0.791011	4.34638	3.17897	3.02808	3.42043
chr1	132630159	132630702	0.000789694	2.50267	1.79794	3.24841	4.32798
chr1	132634160	132634562	0.0394501	2.98927	1.29585	2.96187	3.0779
chr1	132660375	132661108	1.00451e-05	3.12887	2.30664	3.72176	4.78631
chr1	132673175	132673632	0.604519	6.16437	4.63673	3.10397	3.85159
chr1	132680603	132681078	0.536924	9.3317	6.71199	7.27598	10.1117
chr1	132683559	132683995	0.892766	6.08611	4.57207	4.29423	2.58336
chr1	132693513	132694062	0.0209999	4.58067	2.69477	1.24723	1.24901
chr1	132718691	132719143	0.222654	3.26649	2.95264	3.13823	2.72173
chr1	132771660	132772156	0.792595	9.72046	6.39819	4.46898	4.93155
chr1	132773501	132774083	0.577049	9.80565	7.27294	6.14393	5.95596
chr1	132823031	132823357	0.0355371	4.73119	2.37979	1.39131	1.01074
chr1	132875841	132876494	0.074304	14.141	9.44294	6.95036	7.60929
chr1	132949686	132950309	0.243586	10.3382	8.60683	5.46257	5.90994
chr1	132956828	132957146	0.812741	3.98764	4.71791	2.68087	4.59841
chr1	132992864	132994746	0.442733	3.82397	2.90296	3.05702	3.13175
chr1	133004733	133004931	0.000520039	2.21141	0.909246	2.59679	6.32598
chr1	133009195	133009615	0.303444	3.41677	1.86534	1.76419	3.23725
chr1	133012390	133013152	0.884557	7.07965	5.80049	3.65467	5.68011
chr1	133015190	133016192	0.136908	11.3197	9.39378	6.79993	7.18685
chr1	133034698	133035968	0.5311	5.41748	2.77851	1.93723	3.06188
chr1	133049575	133050057	0.0136483	3.29422	1.80255	4.00692	3.10615
chr1	133051915	133052460	0.239221	14.4748	11.8809	9.67619	11.6788
chr1	133078082	133078752	0.617641	9.7145	6.38032	5.07844	6.51442
chr1	133103954	133104425	0.674017	6.62251	3.99704	3.7375	3.60349
chr1	133124764	133125172	0.528168	5.66218	2.81825	2.77721	3.75924
chr1	133141369	133142150	0.331812	2.87878	3.57336	1.3294	1.98939
chr1	133142281	133143351	0.0573603	10.5188	9.38967	5.25368	6.87969
chr1	133156916	133157353	0.237903	7.05495	6.22829	3.63898	3.44229
chr1	133166726	133167190	0.60218	7.23088	4.35965	4.7787	3.38598
chr1	133176939	133177153	0.0240426	4.13199	2.79269	4.22276	4.04209
chr1	133187158	133187648	0.290989	7.30731	4.82388	3.12649	3.29773
chr1	133402905	133403180	0.0105677	0.597931	0.669864	2.88562	2.56995
chr1	133408446	133408782	0.990701	0.60396	3.40867	0.520145	2.03844
chr1	133422155	133422638	0.514715	5.6599	5.66735	3.76417	4.79554
chr1	133422780	133424050	0.728158	10.7084	8.79603	7.82634	8.10538
chr1	133424352	133425371	0.433567	5.39429	3.72017	2.52024	3.37853
chr1	133425505	133425716	0.00010526	1.12223	1.39751	3.76629	6.46383
chr1	133443233	133443731	0.000276333	1.9567	0.994306	3.18805	2.77602
chr1	133444918	133445337	0.0566173	7.45226	8.12796	4.06032	4.08511
chr1	133445512	133445961	0.0361087	6.70486	5.17211	2.28772	2.65708
chr1	133451440	133452141	0.761715	14.7217	11.8437	10.5975	13.1413
chr1	133509932	133510338	0.65079	6.64285	4.89939	3.6398	5.70281
chr1	133554507	133555083	0.0263341	12.1098	8.35083	7.87613	7.88457
chr1	133604908	133605331	0.555836	4.92022	3.4266	2.54752	2.46998
chr1	133608856	133609473	0.0473044	11.7826	7.38386	7.71923	10.811
chr1	133661953	133662676	0.0959097	13.902	9.9529	7.76609	9.41794
chr1	133724160	133724799	0.693281	2.18528	1.66156	1.69405	1.43892
chr1	133742843	133743268	0.180432	5.9721	3.78511	2.79958	2.70254
chr1	133763696	133764079	0.121761	3.73524	2.08415	1.05546	1.35354
chr1	133779298	133779781	0.131365	7.01805	3.9208	2.70484	1.43472
chr1	133802037	133802550	0.00587639	10.2792	7.16103	3.8855	2.65848
chr1	133834171	133834726	0.124681	9.30484	5.1395	2.75916	4.66232
chr1	133877999	133878657	0.871795	11.3584	6.10809	6.73156	6.18759
chr1	133879397	133879888	0.257141	9.959	8.09143	7.38947	7.49553
chr1	133891611	133892003	0.419724	9.22396	7.10226	4.18974	7.47497
chr1	133897045	133897608	0.213056	6.43222	3.53555	1.6223	2.64685
chr1	133904719	133905067	0.53739	2.55732	2.09169	0.66195	1.9897
chr1	133942796	133943386	0.336685	10.1778	7.12501	5.48298	7.35842
chr1	133964071	133964762	0.354432	6.48052	4.8738	5.18348	3.9872
chr1	133991944	133992632	0.00394395	3.0957	1.50556	2.64127	5.63269
chr1	134005886	134006543	0.4152	5.00129	1.97632	2.33606	2.95175
chr1	134013155	134013643	0.956057	6.007	2.94043	2.79116	3.01502
chr1	134017658	134018300	0.0140292	14.5176	9.12533	8.21491	7.75105
chr1	134034598	134036400	0.648707	2.73515	1.44032	1.39878	1.8247
chr1	134036755	134037179	0.119947	5.74672	2.6936	3.34498	5.40027
chr1	134046606	134047163	0.00136365	2.78491	1.66646	3.16329	4.5922
chr1	134048407	134048871	0.141135	2.98699	2.43127	3.05942	3.98524
chr1	134052238	134052762	0.307604	19.8264	15.7028	15.2493	18.4136
chr1	134053862	134054497	0.667741	21.4496	17.7944	14.4678	17.81
chr1	134059249	134059558	0.350867	3.11859	2.74984	1.11458	1.28152
chr1	134062288	134062922	0.0330003	5.28639	3.50228	1.70261	2.16974
chr1	134107379	134107935	0.012324	9.57454	4.25799	2.3558	2.68011
chr1	134108724	134109073	0.0267853	3.85055	2.61613	0.335811	1.0184
chr1	134134009	134134572	0.25472	12.7328	7.45212	5.24421	6.58462
chr1	134195079	134195902	0.795266	2.81715	1.86196	1.87773	1.62215
chr1	134202738	134203274	0.0343239	9.40614	8.00037	4.23611	4.33611
chr1	134209102	134209802	0.242923	10.3012	6.01149	5.92495	6.56384
chr1	134212514	134213103	0.0060039	3.0977	2.04073	3.47774	2.58678
chr1	134215854	134216203	2.61245e-06	1.7917	1.35438	7.15657	4.24392
chr1	134223362	134223967	0.000828737	4.0961	2.38448	4.22363	4.30813
chr1	134230306	134230825	0.0599863	3.72891	3.36375	3.17037	5.06361
chr1	134250071	134250288	1.87854e-05	1.9808	0.304468	3.92292	3.62828
chr1	134251495	134252793	0.0108384	14.9334	12.5785	13.203	12.9283
chr1	134264054	134264843	0.888812	13.7154	9.3654	9.56964	9.71685
chr1	134268208	134268663	9.44868e-06	0.793167	0.372539	2.99093	2.61428
chr1	134286775	134287331	0.438298	7.14263	4.41825	4.48423	6.31424
chr1	134313820	134314910	0.651145	5.43778	4.19135	3.65742	3.55011
chr1	134319863	134320238	0.171592	4.22069	2.48359	0.927006	0.868715
chr1	134373285	134374204	0.517333	3.33337	2.57365	2.22809	1.98998
chr1	134422350	134423005	0.368913	11.8736	7.62816	7.45125	7.85777
chr1	134490977	134491715	0.621163	13.3612	10.8092	8.45582	7.89996
chr1	134505608	134506106	0.0275953	5.18386	3.20131	1.37065	2.66433
chr1	134655123	134656029	1.65373e-05	14.6268	10.2251	2.95043	4.07809
chr1	134865237	134865687	6.09583e-07	8.64453	5.51448	0.88969	1.21854
chr1	134935968	134936559	0.538382	14.9924	9.62322	9.59357	8.82657
chr1	134942519	134943412	0.179272	6.91291	4.59352	5.47437	5.33783
chr1	134954434	134954639	0.0256905	3.39795	0.736386	4.14162	2.97449
chr1	134984005	134984776	0.372708	9.94167	7.05811	7.94736	7.31211
chr1	134997908	134998419	0.192797	5.28592	3.46722	4.2213	3.88775
chr1	135042446	135042996	0.355619	13.163	10.1715	6.09065	7.60269
chr1	135060465	135060789	0.43779	2.99159	2.90736	1.06625	0.902333
chr1	135073925	135074626	0.171314	12.0418	8.40566	6.79989	8.11002
chr1	135077451	135078342	0.538535	17.0342	11.7726	10.2554	12.0782
chr1	135106488	135107104	0.000892474	2.45619	1.66332	3.96112	3.70772
chr1	135110600	135110954	0.119144	3.29274	2.75515	3.67633	3.26404
chr1	135114079	135114434	0.368927	4.45008	3.23782	1.60244	2.24274
chr1	135122522	135123141	0.950749	8.03825	6.04378	4.12826	5.14531
chr1	135123558	135123772	0.0571878	3.6139	0.929709	1.85687	3.74822
chr1	135133798	135134050	0.00198779	1.98398	0.424688	2.25882	1.98135
chr1	135142210	135143304	0.503758	4.10551	2.98484	3.01575	3.27613
chr1	135161877	135162392	0.0969878	7.12118	5.02042	4.51456	6.1321
chr1	135165025	135165520	0.178503	4.82428	2.32392	1.61591	1.2576
chr1	135203271	135204320	0.00498136	12.4658	8.76488	7.90159	9.80087
chr1	135207782	135208288	0.318638	3.58854	2.2439	2.36029	2.68813
chr1	135210945	135211384	0.264629	2.99106	2.42578	0.145059	1.63712
chr1	135249838	135250569	0.924037	16.6433	12.2142	10.6311	11.9228
chr1	135278558	135279126	0.103169	18.1748	15.5563	13.5714	16.9897
chr1	135281979	135282563	1.05072e-05	9.95783	8.63635	2.33831	2.81216
chr1	135319192	135321037	0.126136	6.15487	5.97534	2.65996	4.19435
chr1	135348757	135349730	0.462126	5.32854	2.229	1.87672	3.13021
chr1	135359733	135360099	0.277609	3.06141	2.25172	1.85812	0.637471
chr1	135424128	135424721	0.00477629	3.78991	2.51378	0.39744	1.02503
chr1	135482538	135482961	0.061648	6.56138	4.61538	1.48405	2.53113
chr1	135493208	135493741	0.00983338	8.31814	6.6147	3.51419	2.20451
chr1	135506147	135507304	0.111385	9.36749	6.55839	6.23625	8.99257
chr1	135528784	135529143	0.160113	6.44815	4.12796	5.06071	5.77678
chr1	135556799	135557517	0.967162	2.32388	2.8503	1.12036	2.37054
chr1	135557686	135558389	0.101729	3.57278	2.74269	2.82679	3.52384
chr1	135582173	135582838	0.318058	5.63294	4.10677	2.39168	3.21745
chr1	135588822	135589155	0.00391533	2.45808	1.59667	3.23094	3.0133
chr1	135590833	135591099	0.0753663	3.04913	2.15116	2.55784	3.01823
chr1	135592483	135593007	0.393866	5.00572	5.65515	4.33486	6.53618
chr1	135598487	135598990	0.143517	4.97963	3.36079	4.1717	3.59585
chr1	135612976	135613477	0.213995	20.3595	14.9524	10.2942	11.0009
chr1	135632756	135633403	0.0619564	19.639	13.7744	13.6745	15.4685
chr1	135646538	135646967	0.0112731	3.06382	1.83547	3.83629	3.18682
chr1	135697504	135697880	0.109213	3.28297	2.54614	1.3573	1.38895
chr1	135722009	135722617	0.159762	8.3099	4.17462	5.50727	4.20763
chr1	135779032	135779505	0.241474	4.72615	4.69187	2.29373	1.89568
chr1	135792626	135793355	0.4131	14.9991	11.3083	8.86683	9.48301
chr1	135807936	135808687	0.368129	13.8562	11.529	8.60743	10.1044
chr1	135847160	135847358	0.00878705	0.801635	1.67538	2.00616	4.53482
chr1	135857998	135858962	0.207647	10.6111	6.84017	7.0635	6.75026
chr1	135875354	135875552	0.0259013	1.94186	0.539931	2.28622	2.38872
chr1	135942310	135942898	0.182612	16.437	12.1711	10.1207	12.6675
chr1	135945265	135945855	0.29443	12.0696	10.8132	9.80182	9.9852
chr1	135949752	135950319	0.809613	12.0935	9.71687	6.99836	6.76073
chr1	135956265	135956784	0.000915921	7.93912	4.94683	7.1007	7.37047
chr1	135957354	135958162	0.00224746	3.01898	2.01075	3.16506	2.50174
chr1	135973971	135974668	0.0118148	4.55313	2.10189	3.66693	3.9478
chr1	135974968	135976194	0.0427482	4.19957	3.46729	4.1307	4.37642
chr1	135989365	135989948	0.171395	4.65308	3.35633	3.02938	4.00603
chr1	135995237	135996255	0.156033	3.05811	1.70106	1.51641	3.17419
chr1	136003304	136003759	0.362765	13.0221	9.44575	11.4504	8.1363
chr1	136016723	136017243	0.109908	9.12751	6.21719	4.26312	4.0557
chr1	136048196	136048837	0.107089	15.9197	13.118	11.1428	14.3174
chr1	136092892	136093517	0.938886	12.9435	9.52711	7.61735	7.22599
chr1	136098609	136099013	0.224016	4.95071	2.43448	1.13335	0.980914
chr1	136129445	136130039	0.00158828	1.12791	1.60002	3.34975	2.4278
chr1	136140496	136141266	0.32771	18.2539	13.3271	11.786	10.3177
chr1	136228310	136228918	0.91796	11.8506	6.31121	5.41576	5.6224
chr1	136265336	136265904	0.190765	6.25486	4.2987	1.60449	3.8377
chr1	136311456	136311968	0.735784	2.95145	2.16684	1.67494	1.38963
chr1	136347563	136347978	0.322684	5.68923	3.82108	3.97269	3.47245
chr1	136351789	136352462	0.136402	3.44412	2.99136	1.28535	1.1952
chr1	136391303	136391997	0.494566	6.06274	4.21278	2.46245	5.8778
chr1	136415165	136415693	0.0549689	13.0449	10.4198	6.12177	5.87606
chr1	136420996	136421778	2.99954e-06	3.89551	2.36204	0.0129219	0.336468
chr1	136452774	136453755	0.0252508	4.37627	4.31383	1.69323	3.21427
chr1	136456564	136457404	0.226302	3.63667	2.67918	2.4446	2.23857
chr1	136601427	136601959	0.375494	6.88889	4.27628	4.2679	4.45924
chr1	136610136	136610398	0.229047	2.35823	2.69154	0.231142	0.804559
chr1	136621774	136622236	0.638904	5.84533	3.93825	3.43812	4.12283
chr1	136642214	136642812	0.00821712	6.7061	4.75209	2.47481	2.65339
chr1	136667928	136668359	0.0463183	4.84503	3.26807	4.34627	3.15482
chr1	136725985	136726600	0.215808	16.0916	13.6717	11.7135	14.7829
chr1	136750782	136751362	0.000419413	19.1865	13.7039	15.3438	18.0387
chr1	136852078	136852807	0.774556	5.13156	2.49782	3.05367	2.61448
chr1	136859427	136859868	0.0618436	5.8617	3.68923	4.49783	4.88173
chr1	136869510	136869919	0.490437	5.17879	4.33941	2.91624	4.28433
chr1	136885926	136886576	0.199513	16.9903	13.9621	13.7827	13.7143
chr1	136917607	136917903	3.08012e-05	1.82434	1.37259	2.88626	4.40118
chr1	137002336	137002945	0.0776468	13.9616	9.96607	9.96163	11.0197
chr1	137005196	137005585	0.8814	4.34421	3.33636	2.33571	2.41861
chr1	137006668	137007165	0.00778591	9.44688	6.78826	8.4358	8.79243
chr1	137009162	137009690	0.235227	6.7876	4.42808	6.12368	3.58028
chr1	137028983	137029388	0.162452	5.61257	3.10372	3.78603	4.18928
chr1	137032919	137033535	0.337367	8.94435	4.45724	4.8857	6.01901
chr1	137050944	137051482	0.27303	12.8105	9.30452	5.06447	9.32236
chr1	137066006	137066541	0.0539473	2.39121	1.51376	1.91122	2.93079
chr1	137067811	137068127	0.0541405	3.55731	2.8636	0.380344	0.749296
chr1	137068596	137069108	0.051987	11.2857	8.2946	8.3037	8.69452
chr1	137154835	137156122	0.0272421	4.65945	3.01234	3.22468	4.02222
chr1	137179787	137180799	0.20168	3.13459	1.85461	1.1943	1.24977
chr1	137210387	137210670	0.0154157	2.74557	1.12111	3.41442	2.07885
chr1	137263675	137263892	0.00406102	3.21722	1.18872	3.39306	5.24693
chr1	137264720	137265246	0.286351	14.2791	7.75045	7.8716	8.06881
chr1	137265596	137266029	0.433837	5.95073	4.71471	2.10358	2.6953
chr1	137271336	137272225	0.568369	2.09525	2.15264	1.79541	1.87758
chr1	137326835	137327367	0.0151014	10.9345	5.27086	8.11376	10.7022
chr1	137406806	137407310	0.973348	3.45843	2.60479	2.14892	2.28685
chr1	137436829	137437270	0.359425	9.85661	9.04069	7.57662	8.06632
chr1	137441305	137441645	0.27984	6.57756	8.28263	5.82409	8.21194
chr1	137566877	137567481	0.367397	20.0029	19.5824	14.9161	21.0433
chr1	137584331	137584786	0.562956	3.30832	2.23498	1.76653	1.83195
chr1	137584966	137585198	0.100454	0.855823	1.89205	3.65735	3.28343
chr1	137595755	137596401	0.647457	12.2195	8.57071	9.39821	8.40329
chr1	137616045	137616617	0.347325	11.916	8.24779	7.14241	7.91361
chr1	137628452	137628764	3.64705e-06	1.14235	0.128776	3.45095	3.65441
chr1	137649357	137650294	0.0677088	13.8956	11.1599	9.9264	12.1076
chr1	137662479	137663265	0.596037	4.67253	2.76866	2.47585	2.08998
chr1	137667495	137667746	0.0332884	2.63581	1.26348	3.83997	3.16832
chr1	137677796	137678244	0.248432	12.4441	8.33845	6.19924	5.75679
chr1	137684373	137684647	0.741487	3.09545	3.09982	1.65439	3.30865
chr1	137686343	137686776	0.385194	6.14403	4.06487	2.88338	2.95213
chr1	137707789	137708285	0.0420624	8.55002	6.62231	6.62399	6.68794
chr1	137743652	137744274	0.109278	6.33298	3.0156	1.8411	2.10389
chr1	137747203	137747915	0.367824	16.1089	11.4117	10.7523	10.9071
chr1	137762049	137762802	0.00545388	11.9883	7.91399	8.66388	11.0085
chr1	137779216	137779718	0.0913603	9.67286	6.44751	4.29482	3.68417
chr1	137840374	137840597	0.00154749	1.20944	1.1251	3.05337	2.91775
chr1	137841183	137841693	0.780498	10.6329	6.57227	6.00626	7.76914
chr1	137842250	137842662	0.40578	4.5851	3.63455	3.32193	3.79426
chr1	137855080	137855517	0.290849	8.89482	7.60813	7.00037	7.68205
chr1	137904537	137904770	0.242974	2.16859	1.06017	0.251141	0.761625
chr1	137914100	137914724	0.595714	2.16291	1.28681	1.09918	0.855458
chr1	137942371	137942787	0.950283	4.16846	2.41748	2.04598	3.43769
chr1	137944008	137944398	0.763392	4.55117	3.62084	1.75183	2.39337
chr1	137947983	137948404	0.418642	8.0524	4.06626	5.51777	4.76986
chr1	137972594	137973137	0.0213688	16.5959	14.4385	6.3702	9.08657
chr1	138012610	138013184	0.042873	10.0664	6.37524	3.36933	4.09465
chr1	138036783	138037162	0.0243364	3.37648	2.03749	3.14114	3.13714
chr1	138064061	138064696	0.820951	8.3701	6.71405	5.09026	5.5824
chr1	138066492	138067315	0.57442	13.3347	8.26371	10.1389	11.0151
chr1	138071765	138072145	0.0248679	6.90848	3.45255	2.09568	1.56914
chr1	138109379	138109801	0.127672	6.02096	4.09212	2.02413	2.08056
chr1	138124510	138126068	0.00396656	3.41198	2.08179	3.071	4.4211
chr1	138130667	138131403	0.0721008	7.65969	3.98236	4.47654	5.74948
chr1	138156726	138157228	0.954977	3.01287	3.66905	3.06196	1.51324
chr1	138202973	138203478	0.281657	6.34059	3.43495	1.79825	3.50095
chr1	138241752	138243208	0.115862	6.23417	5.87891	2.93201	4.35853
chr1	138311447	138312443	0.320082	5.05941	4.661	2.9219	3.24782
chr1	138355276	138355968	0.36879	15.8078	11.5587	9.42504	12.0579
chr1	138417875	138418307	0.137836	5.25941	4.5541	1.58425	2.14401
chr1	138421499	138421958	0.163575	6.98063	6.23614	2.84596	3.81865
chr1	138447269	138448221	0.0802181	19.0045	17.006	16.6781	17.0261
chr1	138520762	138522565	0.582977	5.39483	5.04414	3.03418	3.85355
chr1	138561611	138562524	0.852463	3.72537	1.72703	2.36909	1.8811
chr1	138579644	138580009	0.0470889	2.5475	1.89308	0.625674	0.750769
chr1	138581716	138582575	0.151984	2.85115	1.98155	1.91932	1.58475
chr1	138595030	138595654	0.925085	4.76589	3.33839	2.01355	3.66598
chr1	138606795	138607191	0.0197589	3.99743	1.98804	0.867776	0.411381
chr1	138614293	138615102	0.0392611	3.84208	3.22943	4.76988	5.55694
chr1	138622691	138623218	0.289963	4.03183	3.45342	1.84038	2.18723
chr1	138636060	138636547	0.0198635	9.02614	5.77958	7.45419	7.4275
chr1	138645660	138646228	0.282851	6.71647	3.60862	3.69515	3.26993
chr1	138665642	138666034	0.0578992	3.05483	3.94214	1.01842	1.66304
chr1	138670278	138670918	0.00100341	8.97203	4.00688	1.43058	2.00436
chr1	138763291	138763612	0.00645636	2.54968	2.10517	0.191932	0.0342415
chr1	138771526	138772019	0.377262	4.0727	2.2054	2.76086	2.31545
chr1	138791173	138791889	0.285143	3.9549	2.09247	1.27471	1.28439
chr1	138806685	138807363	0.51644	3.54231	1.91519	3.10248	1.77193
chr1	138811909	138812986	0.62833	2.85246	1.94507	1.27457	1.21589
chr1	138843733	138844321	0.956846	2.05464	1.28904	0.781014	0.825773
chr1	138844598	138846002	6.56885e-07	7.80877	5.93286	1.99263	2.44213
chr1	138906736	138907595	0.000688357	4.72845	3.41279	0.414708	0.759621
chr1	139014415	139014835	0.00269889	8.17606	6.5849	2.43089	3.17566
chr1	139121789	139122531	0.203766	19.6896	16.2133	10.4832	11.5461
chr1	139177075	139177589	0.296108	2.40326	1.58315	0.783056	0.569433
chr1	139194791	139195119	0.00129893	3.52368	3.17695	0.692964	0.564351
chr1	139195952	139196327	0.00064305	3.50383	2.09908	0.0134546	-0.227488
chr1	139226946	139227673	0.000155937	6.31306	5.05058	1.25822	1.90771
chr1	139457652	139458457	0.0476613	3.2725	2.16527	0.995659	0.884468
chr1	139794961	139795777	0.825785	4.04649	4.513	3.2804	3.01347
chr1	139796682	139796964	0.0237998	2.06523	1.72805	2.61016	3.55633
chr1	139941021	139941640	0.0567468	16.4735	13.1056	7.05368	9.29656
chr1	139982423	139982849	0.164225	3.73914	3.38406	1.73466	1.9829
chr1	140026667	140027200	0.00665512	10.4093	6.52445	3.09293	3.62322
chr1	140106305	140106717	0.11364	3.55953	2.35099	0.294385	0.206378
chr1	140172493	140172880	0.380567	4.58636	2.03416	0.89312	1.37799
chr1	140224692	140225600	0.407225	15.9502	13.5427	10.0045	11.1903
chr1	140240013	140240438	2.60698e-06	2.48893	1.52078	4.54306	5.56179
chr1	140244684	140245965	0.00768814	4.52786	3.33887	3.73297	4.59712
chr1	140384003	140384584	0.426896	10.2218	7.22164	4.40128	5.62157
chr1	140434384	140434833	0.0571794	5.92557	6.59767	2.02653	3.25976
chr1	140454867	140455308	0.904523	4.66698	3.78042	3.09253	2.42805
chr1	140467704	140468894	0.0692334	3.12798	2.42054	2.4851	2.9435
chr1	140500430	140500790	0.161882	2.36565	1.88866	0.797129	0.586147
chr1	140501238	140501649	0.343991	3.47137	2.32984	2.49381	2.11802
chr1	140513820	140514941	0.077013	4.25552	2.72432	2.84203	3.11123
chr1	140515463	140517091	0.656283	8.65556	5.54917	4.33298	6.2123
chr1	140534397	140534862	0.00810485	7.52817	6.79327	1.47423	2.90865
chr1	140599622	140600205	0.0649737	3.44742	2.13203	1.17635	1.2462
chr1	140648873	140649377	0.533717	12.7607	7.18541	4.83762	6.36128
chr1	140727854	140728283	0.0742215	6.39628	3.78302	3.83864	5.52738
chr1	140731836	140732477	0.103526	11.5628	8.336	6.65096	6.68103
chr1	140792731	140793048	0.786761	3.07475	2.50432	1.80029	2.61571
chr1	140808702	140809332	0.0531707	11.5573	8.82309	8.18808	9.91144
chr1	140825027	140825983	0.623022	4.69177	2.86545	2.32405	2.9918
chr1	140859301	140861211	0.769524	4.6502	5.92753	2.4226	4.92425
chr1	140888932	140889350	0.146918	3.79411	3.20164	2.17647	4.19231
chr1	140979882	140980393	0.463927	10.1958	6.65206	6.10535	6.81099
chr1	141052891	141053396	0.455694	8.69146	5.55991	2.36896	5.52648
chr1	141164309	141164846	0.434691	12.1876	7.68888	6.55048	5.75006
chr1	141210832	141211241	0.0804022	3.58893	3.10042	2.07844	1.27716
chr1	141237004	141237313	0.0627714	4.61357	3.56281	1.10479	2.13234
chr1	141302303	141302716	0.000118272	6.62686	6.47295	1.52722	1.4887
chr1	141351380	141351926	0.0113138	5.37006	3.42157	1.25222	1.53427
chr1	142068056	142068859	0.543957	13.3842	8.2708	5.93847	7.19197
chr1	142069768	142070235	0.0356212	6.11493	3.19899	0.985105	1.43601
chr1	142312264	142312733	0.086606	3.95589	1.93141	0.974455	0.963834
chr1	142427913	142428677	0.147628	15.2206	9.41947	6.39486	7.39343
chr1	142556174	142556590	0.0588761	4.55102	1.71461	0.957378	1.35363
chr1	142557887	142558478	0.00543265	11.7914	9.10407	4.89007	5.12538
chr1	142748179	142748554	0.000157587	4.8388	2.64118	-0.288372	0.15773
chr1	143331959	143332402	1.74495e-06	5.47911	3.27225	0.0205092	-0.368513
chr1	143858297	143858863	0.000236638	8.71201	5.85072	1.41356	1.10013
chr1	143990349	143990788	0.00030384	4.6663	3.07398	0.151957	0.269574
chr1	144634717	144635393	0.766863	2.69149	3.27918	2.3588	2.05142
chr1	144636914	144637260	0.061652	3.01593	2.10374	1.65858	2.7501
chr1	144638682	144639402	0.0467599	10.0117	8.95555	3.70876	6.42311
chr1	145491310	145491795	0.10158	9.45377	5.16287	3.1649	3.58369
chr1	145549350	145550512	0.175948	8.46402	4.31497	4.54621	5.5403
chr1	145577933	145578443	0.669756	10.1861	7.18142	6.56148	5.3126
chr1	145586390	145587244	0.00333038	3.40342	2.12342	2.99359	4.18285
chr1	145624301	145624824	0.502253	2.36986	2.07913	0.991977	0.885549
chr1	145635953	145636344	0.0593472	5.92177	3.29923	1.8947	1.13661
chr1	145650587	145651211	0.0142102	11.2986	5.90062	4.1844	4.26633
chr1	145661050	145661579	0.00044958	4.808	2.83221	0.0171813	0.237856
chr1	145850804	145851971	0.0157676	4.69781	3.06207	1.70989	1.25258
chr1	145853676	145854166	0.0252216	15.0095	9.08138	4.97143	6.67134
chr1	146044766	146045332	0.0528612	9.51238	4.96871	2.51797	2.77686
chr1	146090383	146091168	0.00588667	9.62988	5.86597	3.03723	3.34049
chr1	146200420	146200838	0.0214168	5.16602	2.22871	0.553776	1.06337
chr1	146226946	146227613	0.125582	16.1627	11.653	10.0296	8.91765
chr1	146253738	146254323	0.330104	12.8438	7.97585	4.36778	6.43252
chr1	146278554	146279353	7.09477e-05	9.32212	6.64816	3.42989	2.40881
chr1	146420098	146420477	0.110903	3.67323	2.10609	1.19992	1.10427
chr1	146551273	146551924	0.707576	4.50103	2.83662	2.88129	2.52318
chr1	147777337	147777895	0.155377	3.61882	3.74528	2.13711	1.86014
chr1	147954077	147954438	0.0576532	2.45408	3.38929	1.10004	0.379532
chr1	148058857	148059221	0.792342	3.28918	2.26406	1.40747	1.79062
chr1	148163861	148164283	0.703388	5.23097	3.64392	3.50212	3.54674
chr1	148341327	148342467	0.00144442	3.57359	2.81881	0.856072	0.93718
chr1	148344519	148346493	0.00175244	5.08719	4.2938	1.67971	2.12648
chr1	148362566	148362874	0.912861	3.27111	2.74598	1.65599	2.3196
chr1	148375720	148376122	0.0291975	7.20017	3.02491	1.56138	1.22539
chr1	148819898	148820145	0.0342849	2.03508	2.66001	0.919295	0.359315
chr1	149070429	149070791	0.00316188	3.65206	3.6847	-0.139594	0.67487
chr1	151605539	151606081	0.0206116	12.6528	9.38585	5.13353	4.79424
chr1	151656512	151657077	0.000403941	3.4793	1.78107	0.107404	0.37385
chr1	151680051	151680643	0.284082	15.6095	13.9395	11.3015	13.1142
chr1	151693720	151694136	0.0847496	3.25497	1.80365	1.64018	3.65138
chr1	151703775	151704256	0.00019332	5.84887	3.93707	1.53672	1.95697
chr1	151705851	151706260	0.315117	5.08488	2.45875	1.66818	1.47633
chr1	151709777	151710494	0.871997	5.18477	3.5816	2.85634	2.74119
chr1	151760258	151760856	0.53054	5.42274	2.75921	2.75562	2.27526
chr1	151946590	151947547	0.41898	4.60074	3.36962	2.38297	3.3763
chr1	152049044	152049476	0.388468	3.91597	2.80799	1.44619	1.74962
chr1	152104700	152105140	0.905554	8.91851	6.00139	4.89862	5.40641
chr1	152113565	152114085	0.549655	10.8327	5.14967	5.13442	4.14837
chr1	152344745	152345165	3.86222e-06	11.6385	9.22707	1.34782	3.09638
chr1	152387355	152387839	0.00789557	15.3455	11.3113	4.4563	7.09061
chr1	152438306	152438748	0.00856561	4.28392	2.59305	1.03385	0.695621
chr1	152627056	152627441	0.0140127	4.50324	4.98377	1.33352	0.423105
chr1	152651977	152652244	0.1931	2.03715	2.36423	0.646512	0.997502
chr1	152767371	152767803	6.0044e-05	6.33607	4.29685	0.407161	0.900276
chr1	152856427	152856984	0.563248	13.0028	7.57896	5.50761	5.5039
chr1	152881982	152882783	0.670969	16.0617	12.0446	9.21041	10.5023
chr1	152909511	152909927	0.323472	3.06699	2.35497	1.09345	0.774729
chr1	152913849	152914294	0.634684	5.72897	2.30105	2.92849	1.71533
chr1	152925776	152926543	0.833354	14.3035	11.0965	8.35686	8.05142
chr1	152977087	152977645	0.00424347	2.3617	2.31359	-0.0888387	0.252175
chr1	153005120	153005777	0.00244246	5.29389	4.97916	0.960898	1.81715
chr1	153024411	153025388	0.218581	5.85514	4.06975	2.15708	2.58961
chr1	153025603	153026327	0.00431657	3.21323	2.34071	0.0167468	0.476019
chr1	153136616	153136964	0.0184426	1.78895	1.70913	4.55537	2.60711
chr1	153185394	153185875	0.70321	1.86023	1.78334	1.53252	1.28671
chr1	153190083	153190488	0.36337	4.10867	2.38181	1.41257	1.19798
chr1	153190574	153193408	0.00643498	5.81367	5.2201	2.59446	3.04157
chr1	153195166	153195865	0.109457	6.1825	4.92418	2.35947	2.69502
chr1	153199949	153200348	0.872311	3.67866	2.57553	2.56863	0.853847
chr1	153237064	153237574	0.314389	11.2438	7.95754	6.0023	5.43624
chr1	153339511	153339962	0.118612	4.62761	2.35265	1.26658	1.19936
chr1	153347160	153347713	0.314599	3.08303	2.80935	2.26248	3.15727
chr1	153411375	153412066	0.0159709	17.6689	12.9145	7.8836	9.33276
chr1	153552929	153553794	0.343068	17.0582	13.1961	10.9564	12.2735
chr1	153602441	153603218	0.357936	3.63067	2.06243	1.2581	1.91381
chr1	153667392	153668288	0.823381	13.5511	8.7767	7.0319	8.48334
chr1	153693500	153693971	0.123187	5.15116	3.6673	1.69164	2.28951
chr1	153747475	153748015	1.13905e-06	0.876984	1.52022	4.09803	4.0501
chr1	153800669	153801153	0.0249718	2.86949	3.07218	2.58018	4.83174
chr1	153905260	153905597	0.410456	2.86432	2.98251	0.680499	1.50513
chr1	153910432	153910969	0.0144528	4.32242	2.73431	3.59541	4.77676
[truncated: 36,660 more rows]
