# Supplementary material for: The nuclear matrix protein HNRNPU maintains 3D genome architecture globally in mouse hepatocytes
Source: HighWire-hosted journal article supplement (doi:10.1101/gr.224576.117), 2017-12-22
Supplement: Supplemental_Table_S7.xlsx [file Supplemental_Table_S7.xlsx]

## Sheet: HNRNPU peaks
Supplemental Table S7 Coordinates of HNRNPU peaks (mm9).
chr	start	end
chr1	4775576	4775971
chr1	4797605	4798040
chr1	4847617	4848240
chr1	5073262	5073548
chr1	6204609	6205033
chr1	7078812	7079223
chr1	9535701	9536037
chr1	9933998	9934336
chr1	10027611	10027842
chr1	10222996	10223391
chr1	13106290	13106482
chr1	13363084	13363800
chr1	13650217	13650843
chr1	13667915	13668260
chr1	16162173	16162489
chr1	16508774	16510022
chr1	19195837	19196579
chr1	20744554	20744751
chr1	21069178	21070663
chr1	21156388	21156580
chr1	21208390	21208963
chr1	23928870	23929087
chr1	30930665	30930994
chr1	31005309	31007072
chr1	33776837	33777308
chr1	33813743	33814581
chr1	34068073	34068504
chr1	34177464	34178460
chr1	34293303	34293586
chr1	34491515	34491802
chr1	34899790	34900114
chr1	36125019	36125314
chr1	36301185	36301921
chr1	36364607	36365013
chr1	36425931	36426176
chr1	36528573	36529018
chr1	36569203	36569561
chr1	36613603	36614193
chr1	36995806	36996314
chr1	37476334	37476593
chr1	37486516	37487372
chr1	38042655	38042934
chr1	38186454	38187157
chr1	39592514	39592872
chr1	39633523	39634063
chr1	39815944	39816549
chr1	43225294	43225584
chr1	43502457	43502959
chr1	43990559	43990955
chr1	46910030	46910300
chr1	51535014	51535418
chr1	51972079	51972986
chr1	52170491	52170856
chr1	52176135	52176649
chr1	52289948	52290484
chr1	52557139	52557699
chr1	52901620	52902044
chr1	53353658	53354142
chr1	53370305	53370642
chr1	53841774	53841998
chr1	54983088	54983362
chr1	55109327	55109835
chr1	55144722	55144934
chr1	55187814	55188568
chr1	55440070	55440348
chr1	56596717	56596916
chr1	57902122	57902323
chr1	58026740	58027077
chr1	58416501	58416689
chr1	58449894	58450775
chr1	58466512	58466799
chr1	58501950	58502470
chr1	58768293	58768685
chr1	59030458	59030907
chr1	59819619	59820189
chr1	59821458	59821725
chr1	59969710	59970237
chr1	60154489	60155557
chr1	60237143	60237898
chr1	60400045	60400380
chr1	60466763	60467055
chr1	60623632	60623880
chr1	62753448	62753784
chr1	63223440	63223705
chr1	63227694	63227958
chr1	64074742	64074958
chr1	64083200	64083680
chr1	64167889	64169072
chr1	64663890	64664331
chr1	64737098	64738248
chr1	65003193	65003500
chr1	65232833	65233614
chr1	66747504	66747739
chr1	66863824	66864650
chr1	70668540	70668758
chr1	71603373	71603928
chr1	71934511	71934770
chr1	72272446	72273959
chr1	72290657	72291324
chr1	72301672	72303383
chr1	74168530	74169012
chr1	74171002	74172040
chr1	74331261	74331686
chr1	74342120	74342662
chr1	74433230	74433675
chr1	74443938	74444260
chr1	74634794	74635095
chr1	74708316	74708732
chr1	74838401	74838724
chr1	74849543	74850120
chr1	74852098	74854983
chr1	74863108	74864040
chr1	75138087	75138304
chr1	75165291	75165479
chr1	75188381	75189107
chr1	75211405	75211719
chr1	75215732	75216345
chr1	75248241	75248519
chr1	75313736	75314677
chr1	75475550	75476279
chr1	75556152	75556382
chr1	77513081	77513442
chr1	78654382	78654616
chr1	80306009	80306269
chr1	80337158	80337871
chr1	82287648	82288267
chr1	82721560	82721780
chr1	82835890	82836113
chr1	84835977	84836189
chr1	87956121	87956323
chr1	87960897	87961311
chr1	88050976	88051505
chr1	88075448	88075717
chr1	88240574	88241072
chr1	88255784	88256450
chr1	88384030	88385068
chr1	88400471	88401253
chr1	88422004	88423027
chr1	88479041	88479281
chr1	88600460	88600829
chr1	89109693	89110478
chr1	89114646	89114839
chr1	89223642	89224119
chr1	90174026	90174399
chr1	90371169	90372276
chr1	90598572	90599205
chr1	90660523	90660712
chr1	91005031	91005314
chr1	91351246	91351556
chr1	91476692	91477359
chr1	91499403	91499687
chr1	91839887	91840120
chr1	92497670	92497976
chr1	92499338	92499965
chr1	92806328	92806717
chr1	92919899	92920682
chr1	92949759	92950206
chr1	93146780	93147306
chr1	93194569	93195096
chr1	93355748	93356484
chr1	94076722	94077812
chr1	94803530	94803741
chr1	94830985	94831575
chr1	95167403	95167746
chr1	95202185	95202641
chr1	95341370	95342313
chr1	95374571	95374928
chr1	95408341	95408630
chr1	95531866	95532437
chr1	95650958	95651284
chr1	95698305	95698755
chr1	95721814	95722080
chr1	95975757	95975978
chr1	99666480	99667899
chr1	99873667	99873867
chr1	107075986	107076184
chr1	107559570	107560117
chr1	108068024	108068470
chr1	108610700	108611126
chr1	108656179	108656503
chr1	108692724	108693345
chr1	109486851	109487339
chr1	113760916	113761435
chr1	120207557	120207967
chr1	120524317	120524760
chr1	121304392	121304613
chr1	121318169	121318359
chr1	121400100	121401727
chr1	121419437	121419625
chr1	121538891	121539181
chr1	121733818	121734313
chr1	121894088	121894455
chr1	122017385	122018211
chr1	122133178	122133371
chr1	122161680	122161878
chr1	123464299	123464706
chr1	127331386	127332548
chr1	127415704	127415923
chr1	127456959	127457837
chr1	132630294	132631371
chr1	132986417	132986623
chr1	133022630	133022866
chr1	133034805	133035438
chr1	133141650	133142690
chr1	133422957	133423210
chr1	133424511	133424976
chr1	133763740	133764078
chr1	133806538	133807850
chr1	133904227	133904790
chr1	133964269	133964496
chr1	133994775	133995020
chr1	134030375	134030563
chr1	134035884	134036185
chr1	134313849	134314521
chr1	134373605	134374153
chr1	134921980	134922226
chr1	134930349	134930996
chr1	135142284	135142567
chr1	135320612	135320881
chr1	135506576	135506985
chr1	135970326	135971528
chr1	135975102	135976039
chr1	135995528	135996970
chr1	136258201	136258659
chr1	136302403	136302606
chr1	136352009	136352213
chr1	136852285	136852615
chr1	137263504	137263845
chr1	137270834	137271950
chr1	137326940	137327243
chr1	137584389	137584932
chr1	137595999	137596240
chr1	137662565	137662843
chr1	137667594	137668071
chr1	137717515	137717769
chr1	138125101	138125752
chr1	138311791	138312281
chr1	138521565	138521930
chr1	140245147	140245435
chr1	140515815	140516329
chr1	140825563	140825765
chr1	140859956	140860387
chr1	145549259	145550357
chr1	145623915	145624358
chr1	151709973	151710199
chr1	152239951	152240723
chr1	153005094	153005500
chr1	153190743	153192614
chr1	153275791	153276230
chr1	153348089	153348338
chr1	153602537	153602777
chr1	154233686	154233886
chr1	154471799	154472329
chr1	154613728	154614401
chr1	154749744	154750679
chr1	154751755	154751943
chr1	154976839	154977344
chr1	155121903	155122206
chr1	155334729	155334930
chr1	156853772	156853985
chr1	156946605	156946848
chr1	157005673	157006414
chr1	157405231	157405968
chr1	157656893	157657524
chr1	157659761	157660361
chr1	157820012	157820232
chr1	157882948	157883811
chr1	157887370	157888236
chr1	158400766	158400954
chr1	158547141	158547376
chr1	159003833	159004210
chr1	159006596	159007331
chr1	159011380	159011810
chr1	159186741	159186957
chr1	159342441	159342913
chr1	161162043	161162458
chr1	161974624	161974812
chr1	162142924	162143499
chr1	162450910	162451209
chr1	162722104	162723320
chr1	162836339	162836828
chr1	162964931	162965489
chr1	162969196	162970346
chr1	163000664	163001608
chr1	163061414	163061789
chr1	163178526	163179009
chr1	163899210	163899415
chr1	164500556	164500875
chr1	164670253	164670515
chr1	165924839	165925174
chr1	166179250	166179813
chr1	167166574	167167217
chr1	167391277	167391529
chr1	167571695	167572680
chr1	167694005	167694661
chr1	168184125	168184487
chr1	169300123	169300348
chr1	169323377	169324491
chr1	172104796	172105463
chr1	172519677	172519916
chr1	172797900	172799039
chr1	172815449	172815699
chr1	172963585	172964157
chr1	172968655	172968873
chr1	173031890	173032117
chr1	173041244	173042038
chr1	173114604	173115067
chr1	173200288	173200497
chr1	173217944	173218172
chr1	173259036	173259684
chr1	173367600	173367913
chr1	173431735	173433698
chr1	173957446	173957734
chr1	174011887	174012907
chr1	174078020	174078794
chr1	174242176	174242633
chr1	174430102	174430335
chr1	174431248	174434026
chr1	174563214	174563431
chr1	175843048	175843557
chr1	177622569	177622945
chr1	178748459	178749106
chr1	179372689	179372972
chr1	179405768	179406213
chr1	179641666	179641896
chr1	180117356	180117627
chr1	180248636	180250521
chr1	180251421	180252209
chr1	180260314	180262463
chr1	180266178	180268136
chr1	180298923	180299666
chr1	180336074	180336839
chr1	181475797	181476986
chr1	181890143	181890647
chr1	182243063	182244107
chr1	182295289	182295769
chr1	182317682	182317898
chr1	182499049	182499467
chr1	182655918	182656598
chr1	182708186	182708727
chr1	182743636	182744472
chr1	182780811	182781358
chr1	182866870	182867058
chr1	182872350	182872781
chr1	182874070	182874668
chr1	182881972	182882784
chr1	182918006	182918216
chr1	182946877	182947076
chr1	183074096	183074545
chr1	183081014	183081456
chr1	183142001	183142666
chr1	183772173	183773163
chr1	184212564	184213000
chr1	184338914	184339455
chr1	184447656	184447905
chr1	185857674	185858267
chr1	186280211	186280982
chr1	186499563	186499779
chr1	186555778	186556203
chr1	186706841	186707052
chr1	187152585	187153214
chr1	188006536	188006772
chr1	188528228	188528442
chr1	189039140	189039657
chr1	191511885	191512091
chr1	191551170	191552062
chr1	191745949	191746360
chr1	191993970	191994760
chr1	192752424	192753022
chr1	192802869	192803308
chr1	192849828	192850178
chr1	192886697	192886906
chr1	192992788	192993239
chr1	192998934	193000222
chr1	193002403	193004267
chr1	193006321	193007135
chr1	193048429	193049273
chr1	193141667	193141974
chr1	193149991	193150211
chr1	193221234	193222005
chr1	193541683	193542009
chr1	193731267	193731596
chr1	193962087	193962353
chr1	194169801	194170733
chr1	194571434	194572925
chr1	194681563	194681987
chr1	194684199	194684387
chr1	194999320	195000018
chr1	195127587	195127775
chr1	196445191	196445413
chr1	196478500	196478726
chr1	196486622	196487067
chr1	196802425	196802754
chr1	197058861	197059094
chr10	3134850	3135130
chr10	3187086	3187522
chr10	5151823	5152122
chr10	5959508	5959955
chr10	6011851	6012223
chr10	6234787	6235183
chr10	6239604	6240239
chr10	6373345	6373560
chr10	7309453	7309850
chr10	7445611	7445931
chr10	7676222	7676572
chr10	11000463	11001078
chr10	12588276	12589449
chr10	12642223	12642935
chr10	13687034	13687287
chr10	17442212	17443112
chr10	17742276	17742993
chr10	17775182	17775894
chr10	18564749	18565184
chr10	18735282	18735586
chr10	18763716	18763988
chr10	19311400	19312132
chr10	19653384	19653676
chr10	20031906	20032351
chr10	20067604	20067792
chr10	21509636	21509908
chr10	21712849	21713076
chr10	21714280	21714713
chr10	21720262	21721703
chr10	22450931	22451847
chr10	23869239	23869531
chr10	24031991	24032234
chr10	24166984	24167224
chr10	24316962	24317368
chr10	24318729	24319640
chr10	24589631	24589951
chr10	25016848	25017036
chr10	25079347	25079844
chr10	26491997	26493102
chr10	27794346	27794713
chr10	29081379	29081869
chr10	30522449	30523092
chr10	30530864	30531064
chr10	31187092	31187556
chr10	31328951	31329158
chr10	33739298	33739779
chr10	34138246	34138569
chr10	34227683	34227939
chr10	38891047	38891377
chr10	39451654	39452018
chr10	39618733	39619028
chr10	39814650	39815148
chr10	39977452	39979058
chr10	40602728	40603490
chr10	41022743	41023920
chr10	41238436	41239703
chr10	42481223	42481612
chr10	42940826	42941356
chr10	43199258	43199823
chr10	43260630	43260843
chr10	43298362	43299026
chr10	45297570	45297848
chr10	53099239	53099797
chr10	53316382	53317642
chr10	53349101	53349764
chr10	55948380	55948589
chr10	57785735	57786610
chr10	57909577	57909780
chr10	57960594	57961048
chr10	58704229	58704685
chr10	58759074	58759338
chr10	58906101	58906343
chr10	59041464	59041665
chr10	59342228	59342501
chr10	59362252	59362578
chr10	59370762	59370974
chr10	59372198	59372483
chr10	59413541	59413834
chr10	59740239	59740981
chr10	60223224	60224691
chr10	60242528	60243193
chr10	60278858	60279335
chr10	60280228	60280515
chr10	60294193	60294472
chr10	60551918	60552862
chr10	60938343	60938722
chr10	61802780	61803106
chr10	61949125	61949983
chr10	62254522	62255382
chr10	62486832	62487274
chr10	62801186	62801901
chr10	62892168	62892744
chr10	66559054	66559378
chr10	67000300	67000549
chr10	68439260	68439714
chr10	68675644	68676122
chr10	68970441	68970712
chr10	70747901	70748258
chr10	72117219	72118029
chr10	74967672	74967864
chr10	74979790	74980777
chr10	75495324	75495569
chr10	75808026	75808283
chr10	75905019	75905726
chr10	75931417	75931807
chr10	76590769	76590970
chr10	76609666	76610351
chr10	76880448	76881177
chr10	77044431	77044856
chr10	77068831	77069466
chr10	77084875	77085152
chr10	77472336	77472755
chr10	77900897	77901151
chr10	78995925	78996528
chr10	79131638	79132677
chr10	79145871	79146178
chr10	79317457	79318830
chr10	79371891	79372135
chr10	79388171	79388359
chr10	79446898	79447330
chr10	79449106	79449934
chr10	79496492	79496927
chr10	79502178	79502612
chr10	79537995	79538282
chr10	79593401	79593602
chr10	79603937	79604215
chr10	79611757	79612550
chr10	79630328	79630834
chr10	79689170	79689553
chr10	79711796	79712235
chr10	79723728	79724417
chr10	79754967	79755318
chr10	79786481	79786674
chr10	79811071	79811361
chr10	79861459	79862648
chr10	79896103	79896781
chr10	80024129	80024561
chr10	80039857	80041225
chr10	80119335	80119602
chr10	80139959	80141208
chr10	80164501	80165424
chr10	80214073	80214462
chr10	80217865	80218145
chr10	80423618	80424248
chr10	80500003	80500307
chr10	80599125	80599415
chr10	80645254	80645933
chr10	80755353	80756104
chr10	80783592	80783983
chr10	80813552	80813893
chr10	80840998	80841602
chr10	80892966	80893611
chr10	82321650	82323359
chr10	83006556	83007090
chr10	84084599	84085338
chr10	84565244	84565764
chr10	85379401	85379653
chr10	85420478	85420714
chr10	85484524	85485026
chr10	85773313	85773688
chr10	85961300	85961713
chr10	87323469	87323714
chr10	88906452	88906773
chr10	88949620	88949930
chr10	88969247	88969451
chr10	88991350	88991822
chr10	89148892	89149345
chr10	89207903	89208170
chr10	90545510	90545845
chr10	90586498	90586718
chr10	90633985	90634718
chr10	92749926	92750605
chr10	92915648	92916231
chr10	93002533	93003450
chr10	93103741	93104358
chr10	93661638	93662128
chr10	93977653	93978241
chr10	94151159	94151801
chr10	94786039	94786341
chr10	94879209	94879981
chr10	94964315	94964660
chr10	95006759	95007569
chr10	95403460	95403781
chr10	96079498	96079874
chr10	96084190	96085109
chr10	96086600	96087286
chr10	96090917	96091557
chr10	98376923	98377768
chr10	98724220	98724743
chr10	99478439	99479253
chr10	107598739	107599056
chr10	110943398	110943902
chr10	110952718	110953543
chr10	111409768	111410266
chr10	115734739	115735284
chr10	116018010	116018976
chr10	116387174	116387447
chr10	116433337	116434213
chr10	116585249	116585532
chr10	116813024	116814214
chr10	117124694	117125463
chr10	117147005	117147938
chr10	119645653	119646041
chr10	119913224	119914893
chr10	120072422	120073154
chr10	120301561	120301781
chr10	120313384	120313572
chr10	120335902	120336199
chr10	120470482	120471086
chr10	121063397	121063716
chr10	121176812	121177032
chr10	122634076	122634328
chr10	126338002	126338446
chr10	126365413	126365729
chr10	126602091	126602663
chr10	126702929	126703475
chr10	126725872	126726167
chr10	126727775	126728437
chr10	126749443	126749646
chr10	126775972	126776216
chr10	126817371	126817695
chr10	127058905	127059447
chr10	127078864	127079075
chr10	127103560	127103765
chr10	127105001	127105542
chr10	127176418	127176767
chr10	127495474	127496733
chr10	127528102	127528323
chr10	127529618	127529941
chr10	127759397	127759845
chr10	127805480	127806038
chr10	127962388	127962851
chr10	127985994	127986200
chr10	128027329	128027667
chr10	128063417	128064085
chr10	128132950	128133300
chr10	128328388	128328662
chr10	128346969	128347367
chr11	3189178	3190104
chr11	3230564	3230846
chr11	3309088	3309306
chr11	3352372	3352568
chr11	3404675	3404926
chr11	3414605	3415002
chr11	3779724	3780077
chr11	3996432	3996626
chr11	4035168	4035427
chr11	4086413	4087056
chr11	4095732	4096054
chr11	4161291	4162079
chr11	4494286	4494951
chr11	4537838	4538474
chr11	4965301	4965744
chr11	4999238	5000244
chr11	5161160	5162109
chr11	5204634	5205393
chr11	5344587	5344960
chr11	5421047	5422219
chr11	5640790	5641214
chr11	5688274	5688936
chr11	5737557	5738038
chr11	5778142	5778490
chr11	6167745	6167940
chr11	6174889	6175077
chr11	6191366	6192197
chr11	6315857	6316470
chr11	6344194	6344403
chr11	6375489	6376419
chr11	6424556	6424960
chr11	6425912	6426856
chr11	6427903	6428916
chr11	6447166	6447402
chr11	8563564	8564655
chr11	8910903	8911351
chr11	9017940	9018519
chr11	11688551	11688842
chr11	11709047	11709258
chr11	11862116	11862773
chr11	11873395	11873616
chr11	16312655	16312843
chr11	16408101	16408454
chr11	16459426	16459677
chr11	16491491	16491949
chr11	16652090	16652763
chr11	16690712	16691388
chr11	16703887	16704538
chr11	16744221	16744438
chr11	17853648	17853921
chr11	18919036	18920655
chr11	19820185	19820688
chr11	19825382	19825709
chr11	20012337	20012561
chr11	20148922	20149696
chr11	20232637	20233454
chr11	20531324	20532963
chr11	20641156	20641749
chr11	21138920	21139391
chr11	21449903	21450572
chr11	21471725	21472463
chr11	22338551	22339298
chr11	22412545	22412751
chr11	22873649	22873953
chr11	22890405	22890679
chr11	22908342	22908691
chr11	22967640	22967987
chr11	23155393	23156027
chr11	23206125	23207110
chr11	23397800	23398320
chr11	23533274	23533589
chr11	23565336	23566671
chr11	23670861	23671556
chr11	23794807	23795411
chr11	26493450	26494028
chr11	29146863	29147553
chr11	29273503	29273921
chr11	29426130	29426700
chr11	29592128	29592362
chr11	29740078	29740547
chr11	29925977	29926419
chr11	30097712	30098639
chr11	30167889	30168915
chr11	30671436	30671861
chr11	32105092	32105546
chr11	32245190	32245959
chr11	32304739	32305025
chr11	32354655	32355844
chr11	32663039	32663326
chr11	35582830	35583432
chr11	35647866	35648150
chr11	40505858	40507215
chr11	40568498	40569611
chr11	43561335	43561523
chr11	44283826	44284056
chr11	48620614	48620950
chr11	48630619	48630962
chr11	48631986	48632253
chr11	48647296	48648050
chr11	48651379	48651632
chr11	48667022	48667588
chr11	48669000	48670480
chr11	49057308	49057857
chr11	49660019	49660391
chr11	49838564	49839196
chr11	49944282	49945053
chr11	50002504	50002832
chr11	50011152	50013649
chr11	50014491	50015180
chr11	50016988	50018568
chr11	50020880	50022286
chr11	50023595	50024321
chr11	50025665	50026480
chr11	50038209	50039182
chr11	50050069	50050491
chr11	50105186	50105666
chr11	50139419	50139619
chr11	50191279	50192125
chr11	50244313	50244514
chr11	51076594	51076877
chr11	51397718	51399378
chr11	51419549	51420377
chr11	51449381	51450178
chr11	51501918	51502675
chr11	51672392	51672692
chr11	51687732	51687970
chr11	51729206	51730735
chr11	51754202	51754487
chr11	52096611	52096896
chr11	52174074	52175108
chr11	53138113	53138313
chr11	53163824	53164059
chr11	53576208	53577566
chr11	53608842	53610465
chr11	53815658	53816449
chr11	53926401	53926797
chr11	54251705	54252099
chr11	54600868	54601336
chr11	55274699	55274900
chr11	55311455	55311656
chr11	57331775	57332257
chr11	57458748	57459146
chr11	57591928	57592138
chr11	58039245	58039455
chr11	58114786	58116276
chr11	58136637	58136855
chr11	58976474	58977227
chr11	59041439	59041700
chr11	59120094	59121848
chr11	59263597	59263814
chr11	59272532	59272918
chr11	59318925	59319981
chr11	59414534	59414733
chr11	59475884	59476315
chr11	59591798	59592207
chr11	59600661	59601074
chr11	59652853	59653380
chr11	59761406	59761703
chr11	59778542	59778956
chr11	59859905	59860173
chr11	59927905	59928976
chr11	60023886	60024282
chr11	60033516	60034095
chr11	60166153	60166466
chr11	60267914	60268221
chr11	60372894	60373093
chr11	60521306	60521656
chr11	60643931	60644594
chr11	60691933	60692650
chr11	60744643	60745722
chr11	60749010	60749278
chr11	61045089	61045536
chr11	61080350	61080851
chr11	61221372	61221659
chr11	61231432	61231668
chr11	61318464	61318764
chr11	61575368	61575658
chr11	61667804	61668512
chr11	61770183	61770405
chr11	62094706	62095109
chr11	62270153	62271071
chr11	62352125	62352941
chr11	62363967	62365112
chr11	62368538	62368982
chr11	63675596	63675789
chr11	63892786	63893320
chr11	65620583	65620969
chr11	66866002	66866445
chr11	67633195	67633922
chr11	67710647	67711028
chr11	67735310	67736459
chr11	67905381	67906042
chr11	68667283	68667943
chr11	68829592	68830366
chr11	68850496	68851490
chr11	68853775	68855431
chr11	68875751	68876672
chr11	68886810	68887326
chr11	68908302	68908842
chr11	68910484	68910793
chr11	68911696	68913879
chr11	68937678	68939013
chr11	69222329	69222715
chr11	69225066	69225512
chr11	69392896	69393093
chr11	69394658	69394896
chr11	69446335	69446696
chr11	69475894	69476202
chr11	69484777	69485105
chr11	69495202	69495428
chr11	69571964	69572828
chr11	69608742	69609477
chr11	69617271	69617561
chr11	69651091	69652139
chr11	69888271	69888480
chr11	70033924	70034802
chr11	70245812	70246114
chr11	70265488	70265866
chr11	70314421	70314625
chr11	70338732	70338965
chr11	70460319	70461455
chr11	70561261	70561688
chr11	70817742	70818224
chr11	71956505	71956807
chr11	72034887	72035078
chr11	72242268	72243148
chr11	72254567	72255085
chr11	72303249	72303632
chr11	72316643	72317993
chr11	72420647	72422147
chr11	72502743	72503346
chr11	72609580	72609888
chr11	72850457	72850669
chr11	72861178	72861370
chr11	72973753	72974635
chr11	72989226	72989466
chr11	72990615	72991252
chr11	74335858	74336365
chr11	74451653	74451954
chr11	74537646	74538370
chr11	74584118	74584524
chr11	74643955	74644448
chr11	74645319	74646516
chr11	74651320	74652234
chr11	74711641	74712197
chr11	74739395	74739775
chr11	74986636	74986894
chr11	74992164	74992720
chr11	75027236	75027453
chr11	75161966	75162509
chr11	75274486	75276789
chr11	75280278	75280466
chr11	75323387	75323783
chr11	75344854	75345519
chr11	75401451	75401843
chr11	75433943	75434910
chr11	75444152	75444603
chr11	75465083	75465587
chr11	75492606	75493187
chr11	75501167	75501812
chr11	75546055	75546614
chr11	75582707	75583026
chr11	75948893	75949736
chr11	76030867	76031312
chr11	76212336	76212919
chr11	76220205	76220616
chr11	76293099	76293725
chr11	76308212	76308404
chr11	76576468	76577280
chr11	76660120	76660400
chr11	77303165	77303496
chr11	77307169	77307483
chr11	77420988	77421593
chr11	77499486	77500163
chr11	77576594	77577418
chr11	77585837	77586327
chr11	77686287	77687120
chr11	77688183	77688497
chr11	77845573	77846008
chr11	77908063	77908502
chr11	77964789	77964980
chr11	77978857	77979853
chr11	77990132	77990334
chr11	77991754	77993501
chr11	78002812	78003074
chr11	78267305	78267529
chr11	78325761	78326009
chr11	78348868	78350044
chr11	78364241	78364590
chr11	78564892	78565113
chr11	78669850	78670039
chr11	78832915	78833103
chr11	79027599	79027787
chr11	79067605	79068217
chr11	79348187	79348597
chr11	79424578	79424837
chr11	79517174	79518186
chr11	79955618	79955880
chr11	79998544	79998742
chr11	80022325	80023146
chr11	80241963	80242444
chr11	80289976	80290748
chr11	80593422	80593720
chr11	81820266	81820960
chr11	81833534	81833933
chr11	81848980	81852491
chr11	81929042	81929911
chr11	81949576	81949932
chr11	82594642	82595108
chr11	82684474	82684935
chr11	82721658	82722105
chr11	83084890	83086827
chr11	83253888	83254419
chr11	83286153	83286698
chr11	83663289	83664345
chr11	83777899	83778267
chr11	83847295	83847540
chr11	83881681	83882242
chr11	83993264	83993698
chr11	84631694	84632693
chr11	84642255	84642630
chr11	84683213	84684172
chr11	84693452	84694284
chr11	84953250	84953811
chr11	84983613	84983924
chr11	85656806	85658400
chr11	85662661	85662856
chr11	86070635	86071440
chr11	86297696	86298318
chr11	86392304	86396743
chr11	86397706	86398180
chr11	86400225	86400488
chr11	86497133	86497711
chr11	86571025	86571788
chr11	86623843	86625071
chr11	86886979	86887854
chr11	86900203	86900414
chr11	87236351	87238524
chr11	87240230	87242379
chr11	87256369	87257440
chr11	87261705	87263593
chr11	87275964	87276910
chr11	87284415	87285184
chr11	87409072	87409274
chr11	87475942	87476631
chr11	87503063	87503368
chr11	87550421	87550784
chr11	87872678	87872897
chr11	87881326	87882686
chr11	87912583	87912808
chr11	87975602	87975872
chr11	88816176	88816657
chr11	88835049	88835457
chr11	93746536	93746950
chr11	93829529	93830043
chr11	93856471	93857364
chr11	93994701	93995979
chr11	94006319	94006875
chr11	94021735	94022975
chr11	94072647	94072884
chr11	94182872	94183554
chr11	94189163	94189546
chr11	94207722	94208482
chr11	94410371	94410611
chr11	94490945	94491242
chr11	94777929	94778117
chr11	94797767	94798579
chr11	94840313	94840558
chr11	94903516	94903708
chr11	94939380	94939653
chr11	94959444	94960211
chr11	94968145	94968402
chr11	95120410	95120734
chr11	95245770	95246585
chr11	95276033	95276252
chr11	95574157	95574642
chr11	95719770	95721017
chr11	95879254	95879549
chr11	95926471	95926835
chr11	96002081	96002403
chr11	96638714	96639123
chr11	96650485	96650902
chr11	96683810	96684213
chr11	96691056	96691837
chr11	96777339	96777981
chr11	96824979	96825182
chr11	96828321	96829047
chr11	96838661	96838900
chr11	96883526	96883773
chr11	96887467	96887655
chr11	96911959	96912215
chr11	96988470	96988685
chr11	97048183	97049917
chr11	97170827	97171712
chr11	97177008	97177323
chr11	97280719	97281159
chr11	97296369	97297212
chr11	97310825	97311152
chr11	97393100	97393393
chr11	97524282	97525166
chr11	97561693	97561900
chr11	97563710	97564059
chr11	97606272	97606524
chr11	97630967	97631305
chr11	97660216	97660981
chr11	97849025	97850349
chr11	97887835	97888492
chr11	97892238	97892991
chr11	98054426	98054912
chr11	98063616	98064220
chr11	98203903	98204121
chr11	98261707	98262378
chr11	98300051	98300404
chr11	98543830	98544022
chr11	98616059	98616274
chr11	98637531	98638344
chr11	98644659	98644956
chr11	98647162	98647356
chr11	98670876	98671482
chr11	98698037	98698329
chr11	98794510	98794745
chr11	98820819	98822029
chr11	98824822	98825254
chr11	98901779	98902839
chr11	98905191	98905839
chr11	99091467	99092065
chr11	99299205	99299460
chr11	99333283	99333478
chr11	100151786	100151982
chr11	100181024	100181913
chr11	100183785	100185610
chr11	100406859	100407082
chr11	100800896	100801367
chr11	100928326	100928544
chr11	100943659	100944468
chr11	101017242	101017638
chr11	101035117	101035398
chr11	101139095	101140144
chr11	101177346	101177708
chr11	101286382	101286661
chr11	101303487	101303904
chr11	101326462	101327158
chr11	101329191	101329486
chr11	101488367	101490885
chr11	101503245	101507074
chr11	101519615	101522510
chr11	101561674	101562078
chr11	101845575	101846391
chr11	101922392	101922701
chr11	101948416	101949072
chr11	102017566	102017788
chr11	102046523	102046774
chr11	102106370	102106776
chr11	102178226	102178584
chr11	102268471	102270036
chr11	102308713	102309129
chr11	102328402	102328770
chr11	102348200	102348498
chr11	102417099	102417752
chr11	102440071	102440383
chr11	102505460	102505711
chr11	102786398	102786711
chr11	102963022	102963210
chr11	102964037	102964260
chr11	102976555	102977906
chr11	102993653	102994344
chr11	102995216	102995464
chr11	103128547	103128850
chr11	103133425	103133642
chr11	103173331	103173691
chr11	103224438	103224883
chr11	103263638	103263826
chr11	103815348	103815659
chr11	103828167	103828519
chr11	104092445	104092766
chr11	104177119	104177314
chr11	104180400	104181117
chr11	104303061	104304401
chr11	104472942	104473366
chr11	104890269	104890620
chr11	104985365	104985588
chr11	105042432	105043262
chr11	105805595	105805834
chr11	105927246	105927634
chr11	105945973	105946538
chr11	106021125	106021717
chr11	106054734	106055178
chr11	106077904	106078408
chr11	106116914	106117699
chr11	106133886	106134546
chr11	106348735	106349097
chr11	106362179	106363403
chr11	106473416	106474569
chr11	106640570	106641190
chr11	106649651	106650698
chr11	106781589	106782339
chr11	106873748	106874285
chr11	106889120	106889561
chr11	106992591	106994055
chr11	107050475	107050750
chr11	108205166	108205434
chr11	109205418	109205646
chr11	109511422	109512582
chr11	109856969	109857211
chr11	110219314	110219599
chr11	113511047	113511330
chr11	113612023	113612390
chr11	114529699	114530327
chr11	114536756	114538028
chr11	114736220	114736709
chr11	114738167	114738774
chr11	115024274	115024892
chr11	115138037	115139101
chr11	115228340	115228945
chr11	115235496	115235888
chr11	115242791	115243639
chr11	115274291	115275446
chr11	115352684	115353082
chr11	115425585	115425891
chr11	115473913	115474122
chr11	115569319	115569738
chr11	115675991	115676319
chr11	115720882	115721149
chr11	115819326	115819514
chr11	115881303	115883104
chr11	115885221	115885666
chr11	115948184	115949022
chr11	116000018	116000464
chr11	116056091	116057005
chr11	116059896	116060108
chr11	116295321	116296607
chr11	116307359	116307609
chr11	116477166	116477816
chr11	116482584	116482824
chr11	116518742	116519130
chr11	116937992	116938258
chr11	116943057	116943345
chr11	117219659	117219911
chr11	117429803	117430307
chr11	117547037	117547471
chr11	117652103	117652291
chr11	117671002	117672223
chr11	117710416	117710644
chr11	117824878	117825184
chr11	117848390	117848733
chr11	117964277	117964489
chr11	118216675	118216907
chr11	118263206	118263745
chr11	118337964	118338392
chr11	118832864	118833069
chr11	118836847	118837036
chr11	118884032	118884467
chr11	118947361	118948105
chr11	118987617	118987971
chr11	119216592	119216783
chr11	119352436	119353021
chr11	119463692	119464539
chr11	119794399	119794813
chr11	119804321	119804571
chr11	119806739	119806983
chr11	119837274	119837552
chr11	119947694	119948075
chr11	119962411	119962626
chr11	120051006	120051531
chr11	120172199	120172619
chr11	120211257	120211633
chr11	120239867	120240302
chr11	120298648	120299150
chr11	120345873	120346114
chr11	120379401	120379724
chr11	120441080	120441299
chr11	120442311	120443117
chr11	120459562	120460031
chr11	120479019	120479256
chr11	120485820	120486690
chr11	120491704	120492189
chr11	120494037	120494588
chr11	120574770	120575204
chr11	120657525	120657928
chr11	120794121	120794309
chr11	121065549	121066214
chr11	121098078	121098758
chr11	121120994	121121513
chr11	121534240	121534887
chr11	121563623	121563906
chr12	3571998	3572383
chr12	3791903	3792091
chr12	3806552	3806868
chr12	4599608	4600229
chr12	4914158	4914781
chr12	8214887	8215157
chr12	16596313	16596648
chr12	16901264	16901807
chr12	17559920	17560241
chr12	21291795	21292137
chr12	21379364	21379643
chr12	31956386	31956730
chr12	32035854	32036323
chr12	32634868	32635690
chr12	33638895	33639323
chr12	35731945	35732385
chr12	36219632	36219902
chr12	40928942	40929158
chr12	41750515	41750846
chr12	46175295	46176129
chr12	52478261	52478774
chr12	52792100	52792438
chr12	53071872	53072576
chr12	53604503	53605136
chr12	53704174	53705924
chr12	55797788	55800042
chr12	55896581	55896805
chr12	56086639	56087545
chr12	56587624	56589906
chr12	60114255	60114487
chr12	60141376	60142101
chr12	60232224	60232585
chr12	66137382	66137747
chr12	66174847	66175076
chr12	66273757	66274300
chr12	70462119	70462798
chr12	70683853	70684131
chr12	71926549	71926745
chr12	72069529	72070192
chr12	74880297	74880831
chr12	75418054	75418273
chr12	76836253	76836610
chr12	76919666	76920032
chr12	77560065	77560502
chr12	77637705	77638519
chr12	80273250	80273574
chr12	80397122	80397361
chr12	80642658	80642924
chr12	81260169	81260357
chr12	81321288	81321740
chr12	81330474	81330980
chr12	82585940	82586156
chr12	85291393	85292099
chr12	85534163	85534871
chr12	85559789	85560086
chr12	85791687	85791896
chr12	85930809	85930998
chr12	86113669	86113967
chr12	86217739	86218020
chr12	86679990	86680235
chr12	86939894	86940375
chr12	88067318	88067507
chr12	88812870	88813113
chr12	92827331	92829447
chr12	99913064	99913269
chr12	99952191	99953124
chr12	99963091	99963285
chr12	100631070	100631480
chr12	101437582	101437909
chr12	101518261	101518473
chr12	101962978	101963345
chr12	102190542	102190898
chr12	103151044	103151603
chr12	103995894	103996335
chr12	104626869	104627101
chr12	105294038	105294386
chr12	107022534	107023379
chr12	110030444	110031482
chr12	110032412	110032786
chr12	110073943	110074614
chr12	110132330	110132546
chr12	111684858	111685654
chr12	111934279	111934603
chr12	112083371	112083607
chr12	112615509	112616009
chr12	113825557	113825919
chr12	113931731	113931963
chr12	113959685	113960794
chr12	114067535	114068111
chr12	114113932	114114771
chr12	114188549	114188830
chr12	114214749	114215071
chr12	114313283	114313601
chr12	114378341	114378796
chr12	114393697	114394362
chr12	117519113	117519835
chr12	119539778	119540907
chr13	5844426	5844886
chr13	5859045	5861006
chr13	5862767	5863737
chr13	5864879	5865928
chr13	5869215	5871248
chr13	8995355	8995544
chr13	9016520	9016800
chr13	9093091	9093704
chr13	9128117	9128305
chr13	9764028	9764289
chr13	12552800	12553840
chr13	14722438	14722907
chr13	17787000	17787438
chr13	17896890	17897455
chr13	18084901	18085285
chr13	19711530	19711751
chr13	21252580	21253422
chr13	21271842	21272246
chr13	21292033	21292578
chr13	21314437	21314678
chr13	21325646	21326356
chr13	21351659	21351908
chr13	21454584	21454819
chr13	21545220	21545713
chr13	21622778	21622985
chr13	21947132	21948023
chr13	21973617	21974924
chr13	22006615	22006874
chr13	22010990	22011297
chr13	22032113	22032885
chr13	22107577	22107780
chr13	22114163	22114404
chr13	22120876	22121222
chr13	22142493	22143018
chr13	23377502	23377690
chr13	23516445	23517606
chr13	23518419	23518982
chr13	23522864	23523581
chr13	23529938	23530650
chr13	23545243	23545652
chr13	23558875	23559114
chr13	23589759	23590079
chr13	23591932	23592920
chr13	23609528	23610136
chr13	23613685	23613929
chr13	23623390	23623725
chr13	23646777	23647038
chr13	23831310	23831615
chr13	23853016	23853810
chr13	29947235	29947468
chr13	30228087	30228423
chr13	30636938	30637465
chr13	31065694	31065882
chr13	31670206	31670537
chr13	31724450	31724661
chr13	32430562	32431256
chr13	33096460	33096764
chr13	34094083	34094476
chr13	34129534	34129737
chr13	34744302	34744803
chr13	37949387	37949793
chr13	37987516	37988049
chr13	38726646	38727107
chr13	38750413	38750853
chr13	40954543	40955407
chr13	41016844	41017148
chr13	41344683	41345276
chr13	41757881	41758404
chr13	43399699	43400305
chr13	43460746	43460952
chr13	43493659	43493977
chr13	44826071	44826757
chr13	44828805	44829524
chr13	46059143	46059620
chr13	46823102	46823479
chr13	47138360	47138976
chr13	48640964	48641580
chr13	48973825	48974361
chr13	49282804	49283457
chr13	49311062	49311584
chr13	49516198	49516810
chr13	49748041	49748573
chr13	51196373	51196573
chr13	51740219	51740424
chr13	51746942	51747485
chr13	51948850	51949536
chr13	52070893	52071357
chr13	53075944	53076743
chr13	54167139	54167596
chr13	54604850	54605766
chr13	54723030	54723356
chr13	54795043	54795800
chr13	55201379	55201746
chr13	55429213	55429424
chr13	55431280	55431520
chr13	55572797	55573234
chr13	55573993	55574226
chr13	55672482	55672885
chr13	55701265	55701472
chr13	55828422	55829489
chr13	56804341	56804623
chr13	58230050	58230786
chr13	58289842	58290034
chr13	58503734	58504446
chr13	59776301	59776707
chr13	59870645	59871611
chr13	59924294	59924538
chr13	62957652	62957917
chr13	64533930	64534136
chr13	67033671	67034225
chr13	67209323	67209825
chr13	67584915	67585198
chr13	70776445	70777203
chr13	73901153	73901790
chr13	74777357	74777715
chr13	74945194	74945467
chr13	75844674	75845077
chr13	78302648	78303161
chr13	81024931	81025657
chr13	81080189	81080402
chr13	81796440	81796712
chr13	90229294	90229580
chr13	90613171	90613506
chr13	91345947	91346210
chr13	91863928	91864116
chr13	91946938	91947146
chr13	93011499	93011687
chr13	93124693	93125430
chr13	93300421	93301161
chr13	94073799	94074250
chr13	94269258	94269677
chr13	95055315	95055569
chr13	95293531	95293824
chr13	95746168	95746408
chr13	97967871	97968408
chr13	97975154	97975607
chr13	98011053	98011384
chr13	98746675	98747048
chr13	98975920	98976403
chr13	99032768	99032978
chr13	99086550	99087151
chr13	99449336	99450116
chr13	99660404	99661061
chr13	99694988	99696449
chr13	99725408	99725810
chr13	101500871	101501059
chr13	101556669	101556857
chr13	102538016	102538841
chr13	103695371	103695640
chr13	104563744	104564657
chr13	104968368	104969157
chr13	108275820	108276051
chr13	108466394	108467167
chr13	108680711	108681397
chr13	108834344	108835045
chr13	109004372	109004761
chr13	110612498	110612737
chr13	111184670	111185441
chr13	112515475	112516141
chr13	115880414	115880922
chr13	117813303	117813546
chr13	120217399	120218429
chr13	120251349	120251616
chr14	8641178	8641455
chr14	8650364	8650761
chr14	8930570	8930808
chr14	9046464	9046775
chr14	9142084	9142279
chr14	14845212	14845717
chr14	14953428	14953616
chr14	17075611	17076344
chr14	17081780	17082027
chr14	17198190	17198743
chr14	19070666	19071365
chr14	19103078	19103934
chr14	19725932	19726311
chr14	21167103	21167405
chr14	21364988	21365883
chr14	21526414	21526701
chr14	22650775	22650987
chr14	22667079	22668327
chr14	26280064	26280974
chr14	26324680	26324901
chr14	26346429	26347098
chr14	26352610	26353651
chr14	26513486	26513703
chr14	26588363	26588698
chr14	27458459	27458849
chr14	27476941	27477531
chr14	27478305	27478667
chr14	27489073	27489430
chr14	27783432	27783665
chr14	28242051	28242410
chr14	28321611	28322137
chr14	31292573	31293053
chr14	31528940	31529571
chr14	31638735	31638969
chr14	31701504	31701786
chr14	31764492	31764776
chr14	31832360	31832758
chr14	32018672	32018929
chr14	32064045	32064391
chr14	32149772	32150278
chr14	32249154	32249446
chr14	32454326	32454543
chr14	32482336	32483011
chr14	32643178	32644125
chr14	34027040	34027777
chr14	34060793	34061156
chr14	34063824	34064619
chr14	34132739	34133571
chr14	34259798	34260549
chr14	35123217	35124099
chr14	35315713	35316500
chr14	35361858	35362409
chr14	35582214	35582402
chr14	37947879	37948848
chr14	45970636	45971312
chr14	46149266	46149658
chr14	46276686	46278065
chr14	47006887	47007293
chr14	47379887	47380328
chr14	47441141	47441846
chr14	47502203	47502394
chr14	47896201	47896886
chr14	48092078	48092430
chr14	48269009	48269222
chr14	49065730	49066296
chr14	49685984	49686413
chr14	51489846	51490035
chr14	51683456	51683762
chr14	51684621	51684944
chr14	51708294	51709484
chr14	52924562	52924856
chr14	54717243	54717704
chr14	55136493	55136698
chr14	55495403	55495685
chr14	55512528	55513404
chr14	56159026	56159293
chr14	56178747	56179536
chr14	56262206	56262447
chr14	56492879	56493127
chr14	56565479	56566027
chr14	57396769	57397289
chr14	58042943	58043131
chr14	58364360	58364579
chr14	58445100	58445311
chr14	58529460	58529658
chr14	58872586	58872848
chr14	60883770	60884050
chr14	61403368	61403574
chr14	61978986	61979278
chr14	62058328	62058915
chr14	62266827	62267607
chr14	62299773	62300516
chr14	63379988	63380962
chr14	63741376	63741598
chr14	64162552	64162784
chr14	64479007	64479340
chr14	67487440	67487846
chr14	67690939	67691227
chr14	67807678	67807950
chr14	69902918	69903427
chr14	70107223	70107411
chr14	70553144	70553789
chr14	70688998	70689212
chr14	70919816	70920518
chr14	70999380	70999801
chr14	71180842	71181394
chr14	73725558	73726259
chr14	73845076	73845897
chr14	73924624	73924817
chr14	73952489	73952788
chr14	75347551	75347777
chr14	76153940	76154443
chr14	76229210	76229499
chr14	76249673	76252041
chr14	76410656	76410906
chr14	76510542	76511001
chr14	76552476	76553006
chr14	76905261	76906005
chr14	76956056	76956378
chr14	77098598	77098794
chr14	77436318	77436671
chr14	79248801	79249280
chr14	79881234	79881749
chr14	87816251	87817021
chr14	99698362	99698608
chr14	102052835	102053151
chr14	102239795	102239994
chr14	102253040	102253272
chr14	103498018	103499065
chr14	103912388	103912580
chr14	104921498	104921800
chr14	106296543	106297138
chr14	115441106	115441606
chr14	117325241	117326307
chr14	119105452	119105931
chr14	119109015	119109485
chr14	119150444	119150950
chr14	120675918	120676449
chr14	121434757	121435512
chr14	121778122	121778870
chr14	122196862	122197832
chr14	122580731	122581058
chr14	123312228	123312458
chr15	3533372	3533591
chr15	3945741	3946476
chr15	5066223	5066846
chr15	6524494	6524934
chr15	6575682	6576013
chr15	6657620	6658255
chr15	8047925	8048113
chr15	8049019	8049289
chr15	9070020	9070366
chr15	9529288	9529480
chr15	10399943	10400845
chr15	10415478	10416035
chr15	10911581	10911829
chr15	11329445	11329645
chr15	11655724	11656049
chr15	11925589	11925856
chr15	12047324	12047998
chr15	12133902	12135052
chr15	12251027	12251270
chr15	13297723	13299133
chr15	16334001	16334313
chr15	16495971	16496159
chr15	25278248	25278979
chr15	25551411	25553023
chr15	25569023	25569218
chr15	25726218	25726414
chr15	25830423	25830641
chr15	25863039	25863467
chr15	27348278	27348635
chr15	27396148	27396804
chr15	27560114	27560734
chr15	27955847	27956073
chr15	31383256	31383639
chr15	31460988	31461230
chr15	31531163	31531394
chr15	33012760	33013290
chr15	34012445	34012662
chr15	34373141	34373343
chr15	35085098	35085526
chr15	36212110	36212651
chr15	36426453	36426672
chr15	36538735	36539447
chr15	36722167	36722589
chr15	36936649	36937517
chr15	37050278	37050636
chr15	37721319	37721640
chr15	37890610	37891172
chr15	38007899	38008991
chr15	38229092	38232212
chr15	38384520	38384876
chr15	38403355	38403678
chr15	38449185	38449488
chr15	38944042	38944230
chr15	39775291	39775867
chr15	41620257	41620938
chr15	43114046	43114414
chr15	43309043	43309246
chr15	44259675	44259927
chr15	44450856	44451086
chr15	51544358	51545228
chr15	51562573	51562769
chr15	53177426	53177921
chr15	54403753	54404070
chr15	54903629	54904016
chr15	54921585	54922271
chr15	55388816	55389277
chr15	57525869	57527061
chr15	57737574	57738524
chr15	57807358	57807628
chr15	57865459	57865947
chr15	57966525	57966902
chr15	58215089	58215290
chr15	58654380	58655139
chr15	58719846	58720624
chr15	58764697	58765558
chr15	59146226	59146801
chr15	59479059	59479562
chr15	59591220	59591448
chr15	60655689	60656744
chr15	61363723	61363911
chr15	61441326	61441525
chr15	61815962	61817296
chr15	61875324	61875595
chr15	62119016	62119809
chr15	62159891	62160824
chr15	62897689	62897962
chr15	63172143	63172489
chr15	63829205	63829630
chr15	64051318	64051879
chr15	64144019	64144393
chr15	64213911	64214367
chr15	66409326	66409675
chr15	66800999	66801476
chr15	66977647	66978279
chr15	67007643	67008581
chr15	68089903	68090604
chr15	68194297	68194744
chr15	72921129	72921317
chr15	73253211	73254445
chr15	73272885	73273073
chr15	73342994	73343272
chr15	74551351	74552099
chr15	74579703	74579891
chr15	75446619	75447348
chr15	75508989	75509966
chr15	75578608	75579159
chr15	75724618	75725100
chr15	75739570	75739942
chr15	75751609	75751866
chr15	75771297	75771630
chr15	75900044	75900555
chr15	76029157	76029498
chr15	76157734	76158123
chr15	76180925	76181191
chr15	76286647	76287059
chr15	76307768	76307971
chr15	76342081	76342710
chr15	76437792	76437997
chr15	76456282	76456649
chr15	76486982	76487189
chr15	76490303	76490572
chr15	76528260	76528488
chr15	76552778	76553293
chr15	76734481	76734899
chr15	76981050	76981240
chr15	76982817	76983699
chr15	77136817	77137588
chr15	77586600	77588554
chr15	77628498	77629438
chr15	77666463	77666673
chr15	77672867	77673066
chr15	77909404	77909903
chr15	78236176	78237080
chr15	78278306	78278861
chr15	78362413	78362880
chr15	78672817	78673250
chr15	78706640	78707907
chr15	78758536	78758724
chr15	78869345	78869622
chr15	79153943	79154274
chr15	79186196	79187271
chr15	79189971	79191644
chr15	79198951	79199234
chr15	79233574	79233889
chr15	79356997	79357187
chr15	79376375	79376851
chr15	79501145	79501505
chr15	79518200	79518593
chr15	79521352	79521544
chr15	79572507	79572763
chr15	79604639	79604875
chr15	79843113	79843632
chr15	79844706	79845108
chr15	79854694	79855343
chr15	79906566	79907711
chr15	79912329	79914577
chr15	79921574	79921823
chr15	79963442	79963648
chr15	80063571	80064592
chr15	80085946	80086773
chr15	80088104	80088833
chr15	80094663	80094888
chr15	80628263	80629010
chr15	80778622	80779039
chr15	80808181	80808488
chr15	80820125	80820391
chr15	81094778	81095140
chr15	81296279	81297464
chr15	81344750	81344947
chr15	81415877	81416495
chr15	81560216	81560668
chr15	81688648	81688980
chr15	81756432	81756818
chr15	81758232	81758983
chr15	81767197	81767480
chr15	81790649	81791385
chr15	81846294	81846925
chr15	81958127	81958444
chr15	81977688	81978593
chr15	82074725	82075038
chr15	82076097	82076429
chr15	82077648	82077842
chr15	82730007	82730454
chr15	82930283	82930837
chr15	82952962	82953480
chr15	82978817	82980707
chr15	82987432	82987876
chr15	83002602	83002948
chr15	83180509	83180962
chr15	83341287	83341482
chr15	83385741	83386111
chr15	83393438	83394615
chr15	84022564	84023036
chr15	84818276	84818686
chr15	85167225	85167436
chr15	85353872	85354115
chr15	85464869	85465261
chr15	85483529	85484738
chr15	85500232	85501506
chr15	85540055	85540936
chr15	85602711	85602901
chr15	85641771	85642079
chr15	85689968	85690300
chr15	85709480	85709909
chr15	86031540	86031837
chr15	86044608	86044919
chr15	87454484	87454832
chr15	87456087	87456337
chr15	88582354	88582720
chr15	88686036	88686239
chr15	88692330	88692976
chr15	88697420	88698075
chr15	88958865	88959557
chr15	88999673	89000093
chr15	89026697	89027760
chr15	89041989	89042238
chr15	89185767	89187045
chr15	89203716	89204667
chr15	89260478	89260992
chr15	90054737	90055175
chr15	90509113	90510735
chr15	90879636	90880538
chr15	93105289	93106925
chr15	93166660	93167482
chr15	95717752	95718031
chr15	96115553	96116214
chr15	96117025	96118945
chr15	96290779	96291549
chr15	96529604	96530078
chr15	96540418	96540751
chr15	97494423	97494721
chr15	97497929	97498128
chr15	97598018	97598646
chr15	97614736	97615076
chr15	97655500	97655716
chr15	97661311	97662317
chr15	97879396	97880052
chr15	97923650	97923852
chr15	98364345	98364789
chr15	98397951	98398596
chr15	98461990	98462217
chr15	98701965	98702769
chr15	98726371	98726802
chr15	98748552	98748883
chr15	98764586	98765179
chr15	98783486	98784047
chr15	98860249	98861303
chr15	98904905	98905163
chr15	98929601	98929926
chr15	98956622	98957035
chr15	99125274	99125758
chr15	99200570	99201151
chr15	99224305	99224811
chr15	99499423	99499704
chr15	99519380	99519576
chr15	99532369	99532591
chr15	99545368	99546152
chr15	99555940	99556347
chr15	99869091	99869527
chr15	100057968	100058839
chr15	100299172	100299688
chr15	100382044	100382611
chr15	100445251	100447036
chr15	101114236	101114510
chr15	101804218	101804499
chr15	101823363	101823721
chr15	101846663	101847502
chr15	101863461	101864865
chr15	101876276	101876525
chr15	101931043	101931278
chr15	101966342	101966875
chr15	102033651	102034648
chr15	102073927	102074219
chr15	102077331	102078463
chr15	102109430	102110018
chr15	102181058	102181351
chr15	102207339	102207889
chr15	102235672	102235898
chr15	102236991	102237180
chr15	102289369	102289791
chr15	102300644	102300979
chr15	102341006	102341893
chr15	102347554	102347751
chr15	102348886	102349199
chr15	102455600	102456450
chr15	102496021	102496215
chr15	102573078	102573363
chr15	103012638	103012884
chr15	103070909	103072298
chr15	103088777	103089037
chr15	103103246	103103529
chr15	103153586	103154565
chr16	4077639	4077941
chr16	4213404	4214298
chr16	4568128	4568316
chr16	4624295	4625055
chr16	4683589	4684400
chr16	4879729	4879930
chr16	5013466	5013862
chr16	5136008	5136822
chr16	5254512	5254829
chr16	8671692	8672352
chr16	10754366	10754957
chr16	10784443	10785422
chr16	10992492	10993234
chr16	11066218	11066752
chr16	11134484	11135129
chr16	11909180	11909548
chr16	13109726	13110127
chr16	13437321	13438278
chr16	16213198	16213581
chr16	16358673	16359036
chr16	16870710	16871074
chr16	16983381	16983687
chr16	17293048	17293300
chr16	17911294	17911586
chr16	18052810	18053000
chr16	18248347	18249120
chr16	18343946	18344266
chr16	18425792	18426741
chr16	18876498	18877296
chr16	20097509	20098263
chr16	20302156	20302672
chr16	20516875	20517433
chr16	20548290	20548731
chr16	20716093	20716459
chr16	23107373	23107954
chr16	23272789	23273045
chr16	23988028	23989172
chr16	30066928	30067284
chr16	30068259	30069089
chr16	30070268	30070491
chr16	30550552	30550771
chr16	30587888	30588141
chr16	31664208	31664571
chr16	32002817	32003361
chr16	32079035	32079524
chr16	32332380	32332954
chr16	32608898	32609136
chr16	32877640	32877851
chr16	32914093	32914317
chr16	33062228	33062569
chr16	33251563	33251876
chr16	33400323	33400553
chr16	34690470	34690734
chr16	38089866	38090125
chr16	42876219	42876407
chr16	43364015	43364372
chr16	44724248	44724741
chr16	45742877	45743217
chr16	45967033	45967727
chr16	46010352	46010622
chr16	46496754	46497391
chr16	50736874	50737084
chr16	55838956	55839254
chr16	55895408	55895727
chr16	55973979	55974789
chr16	56029366	56029583
chr16	64770693	64770921
chr16	70314161	70314549
chr16	78317271	78318287
chr16	84735415	84735677
chr16	85148999	85149217
chr16	87495987	87496186
chr16	87699153	87699342
chr16	90283816	90285041
chr16	90934738	90935297
chr16	91373065	91373253
chr16	91647068	91648303
chr16	91688779	91689378
chr16	91728717	91730096
chr16	92611122	92611369
chr16	93603917	93604961
chr16	95923481	95923983
chr16	96212359	96213267
chr16	98072941	98073397
chr16	98218288	98218708
chr17	3114818	3115552
[truncated: 3,287 more rows]
